# Supplementary material for: Minimizing the effects of Pb loss in detrital and igneous U–Pb zircon geochronology by CA-LA-ICP-MS
Source: Copernicus journal article supplement (doi:10.5194/gchron-6-89-2024), 2024-03-27
Supplement: Supplementary file 1 [file gchron-6-89-2024-supplement.pdf]

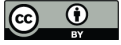

*Supplement of*

## **Minimizing the effects of Pb loss in detrital and igneous U–Pb zircon geochronology by CA-LA-ICP-MS**

**Erin E. Donaghy et al.**

*Correspondence to:* Erin E. Donaghy (edonaghy@purdue.edu)

The copyright of individual parts of the supplement might differ from the article licence.

### **Primary and Secondary Reference Material LA-ICPMS and CA-LA-ICPMS Data**

This section consists of one-page summaries (Figs. S1-S13) for each primary and secondary reference material analyzed in this study. The summaries include rank order plots of the weighted means for each run in both the treated and untreated aliquots. Concordia diagrams show all runs for treated and untreated aliquots. Finally, each one-page summary includes example CL images for comparison of treated and untreated aliquots.

All raw data for concordant and discordant U-Pb zircon geochronology is included in Tables S1-S13 in this section.

Figure S14 shows all of the reference materials from the round robin study plotted against  $^{238}\text{U}$  cps normalized to SLF. Please see the manuscript text and the below section (Fig. S15) for detailed description of how data was normalized to SLF  $^{238}\text{U}$  cps.

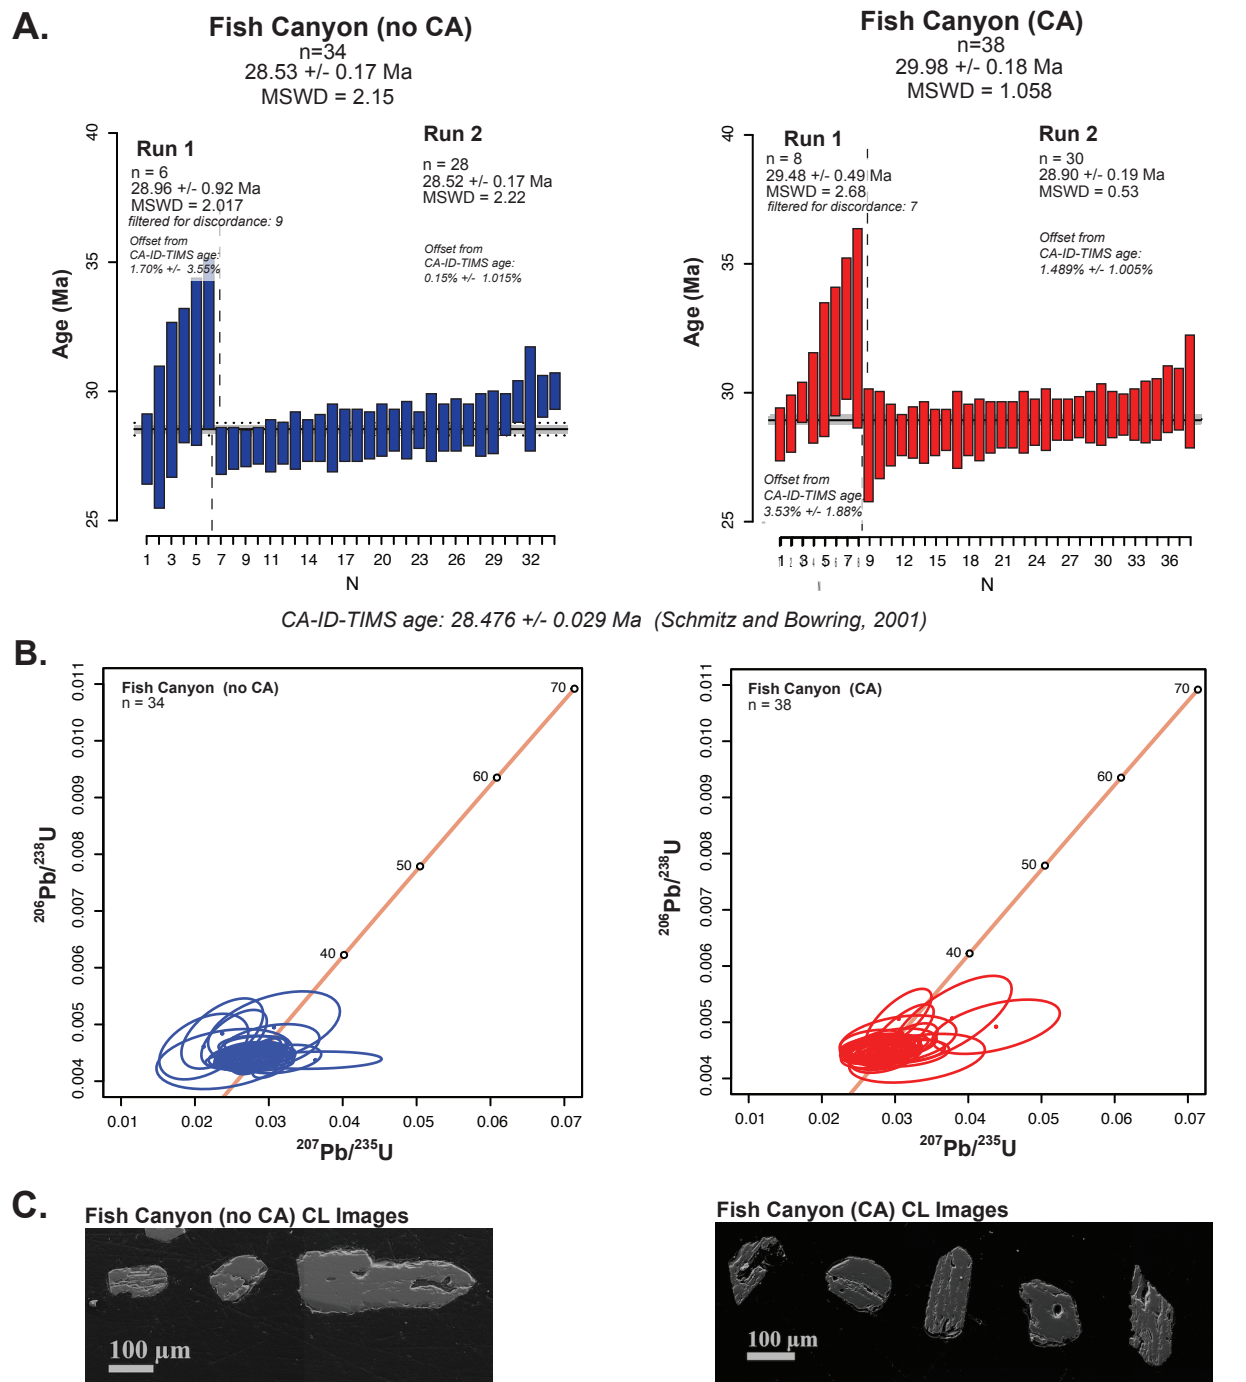

**Figure S1. A.** Rank order plots show weighted mean calculations and the deviation from the CA-ID-TIMS age of individual runs for treated and untreated aliquots of reference material Fish Canyon. Reported as 2-sigma uncertainty. **B.** Concordia diagram of all U-Pb analyses for treated and untreated aliquots of Fish Canyon. **C.** Example CL images of treated and untreated aliquots of Fish Canyon.

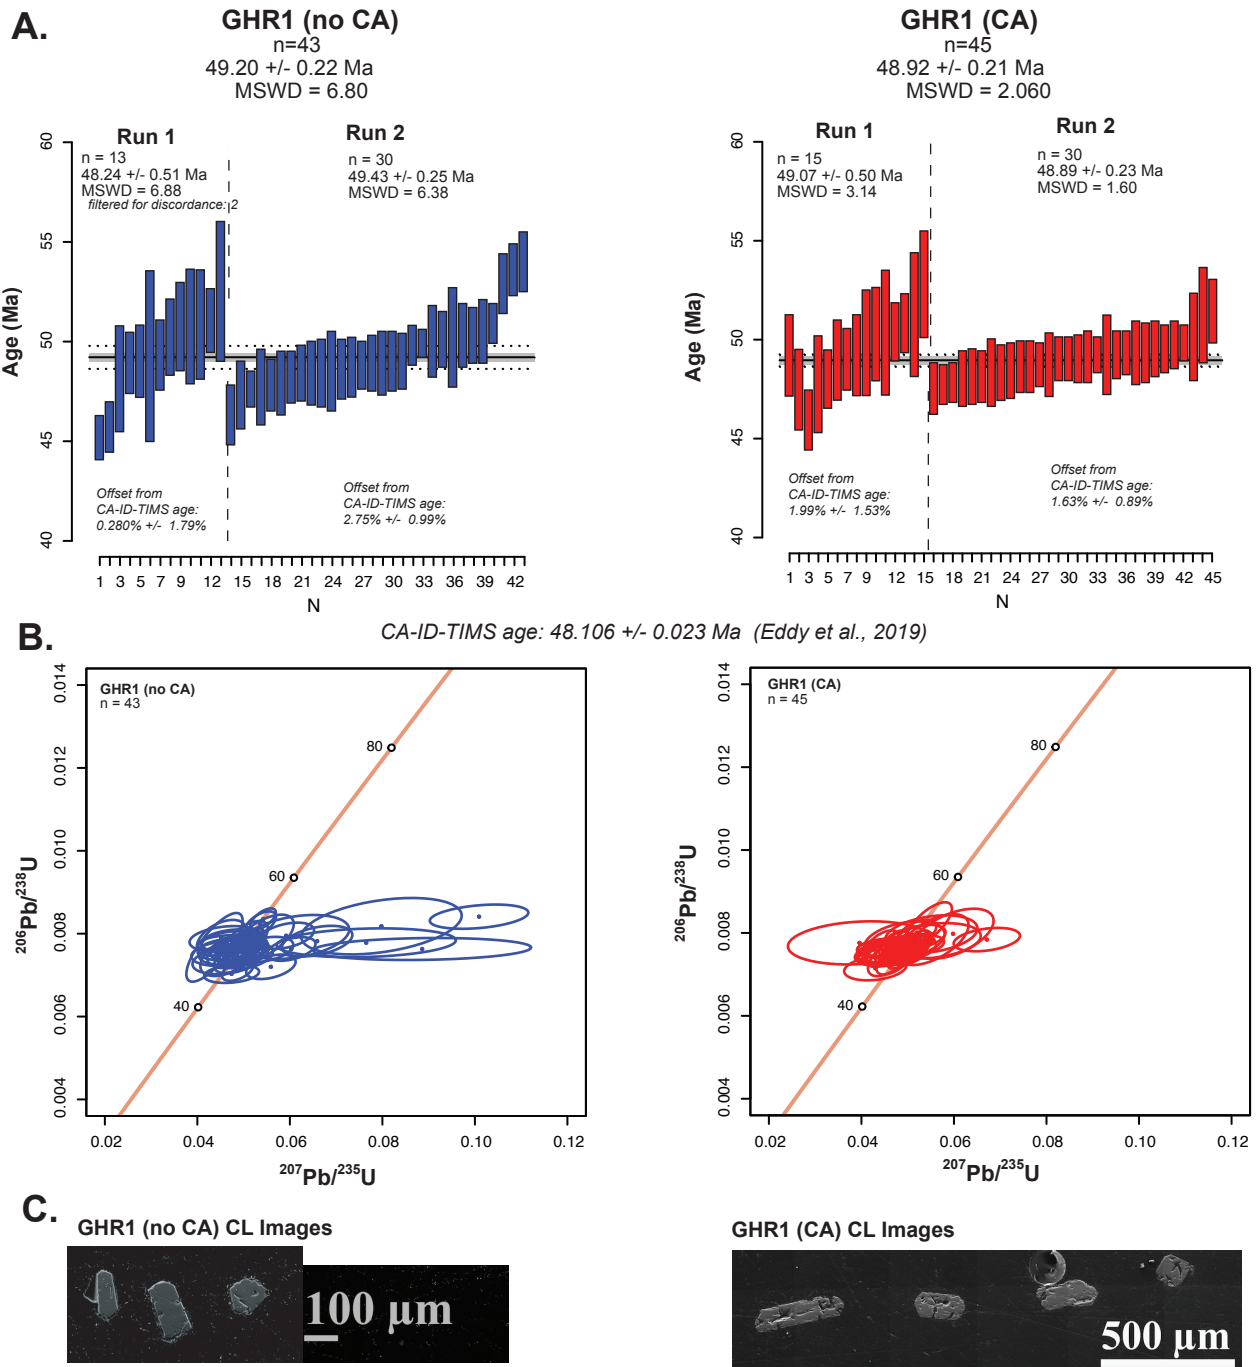

**Figure S2. A.** Rank order plots show weighted mean calculations and the deviation from the CA-ID-TIMS age of individual runs for treated and untreated aliquots of reference material GHR1. Reported as 2-sigma uncertainty. **B.** Concordia diagram of all U-Pb analyses for treated and untreated aliquots of GHR1. **C.** Example CL images of treated and untreated aliquots of GHR1.

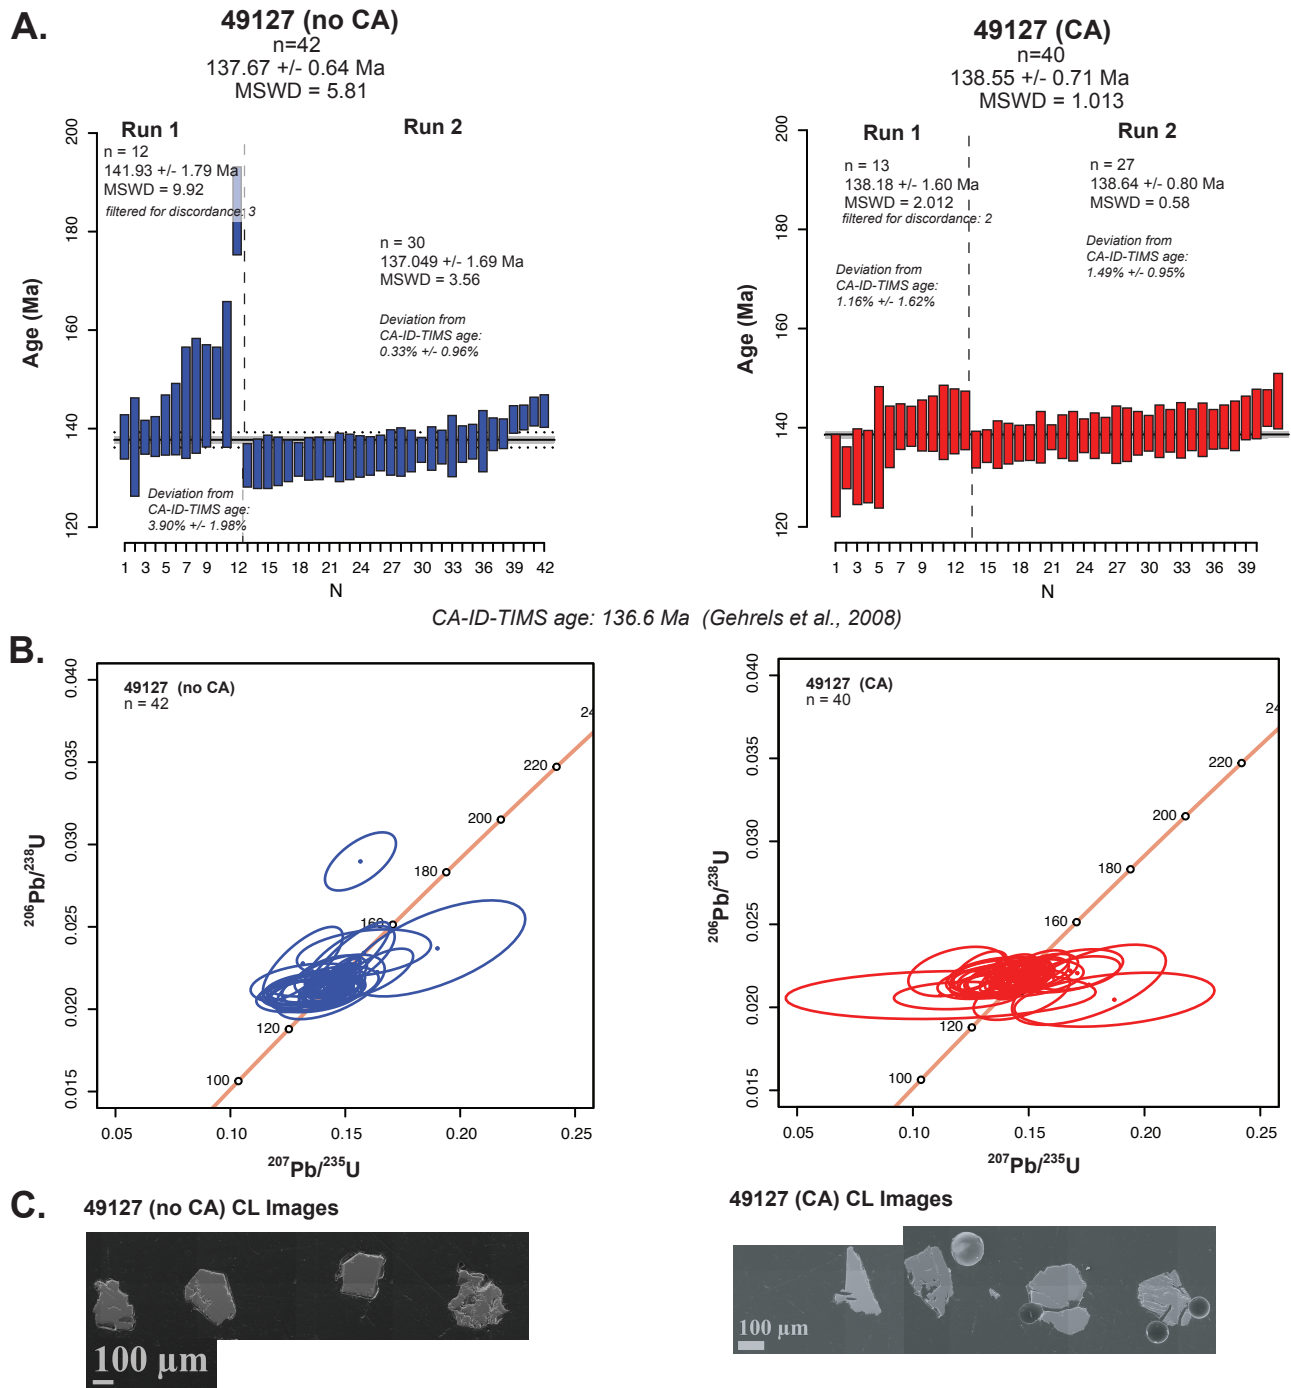

**Figure S3. A.** Rank order plots show weighted mean calculations and the deviation from the CA-ID-TIMS age of individual runs for treated and untreated aliquots of reference material 49127. Reported as 2-sigma uncertainty. **B.** Concordia diagram of all U-Pb analyses for treated and untreated aliquots of 49127. **C.** Example CL images of treated and untreated aliquots of 49127.

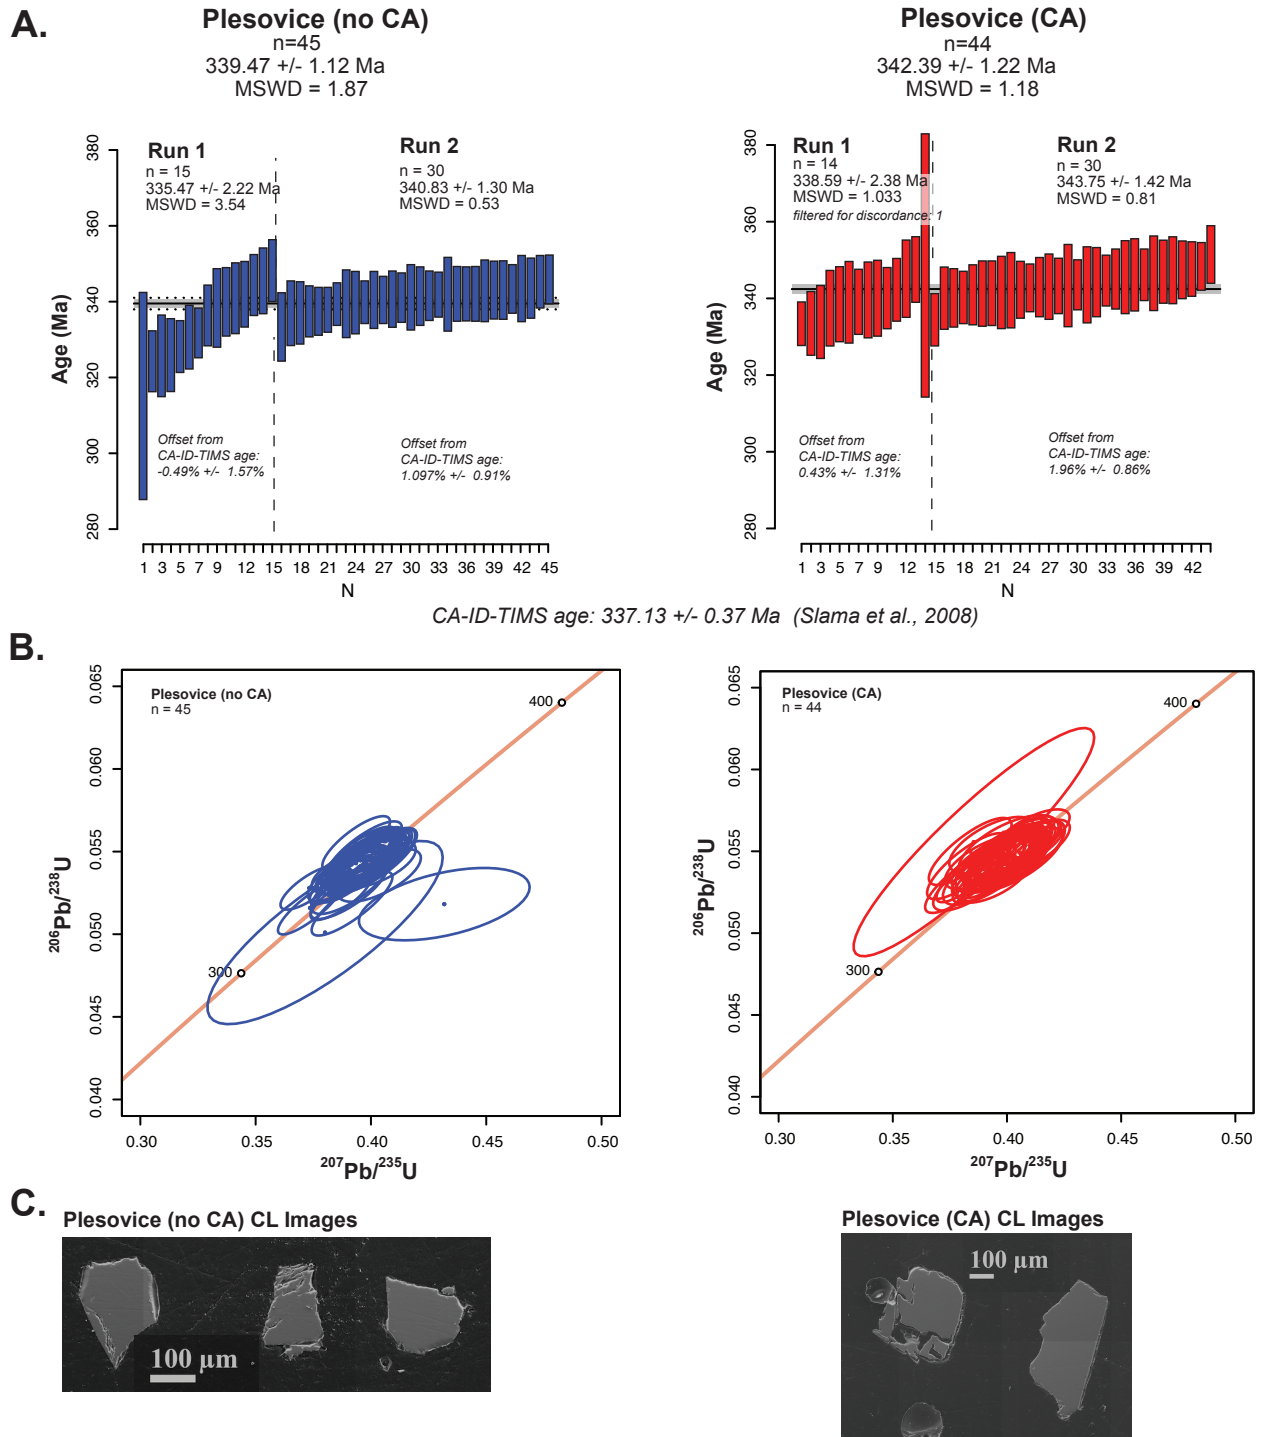

**Figure S4. A.** Rank order plots show weighted mean calculations and the deviation from the CA-ID-TIMS age of individual runs for treated and untreated aliquots of reference material Plesovice. Reported as 2-sigma uncertainty. **B.** Concordia diagram of all U-Pb analyses for treated and untreated aliquots of Plesovice. **C.** Example CL images of treated and untreated aliquots of Plesovice.

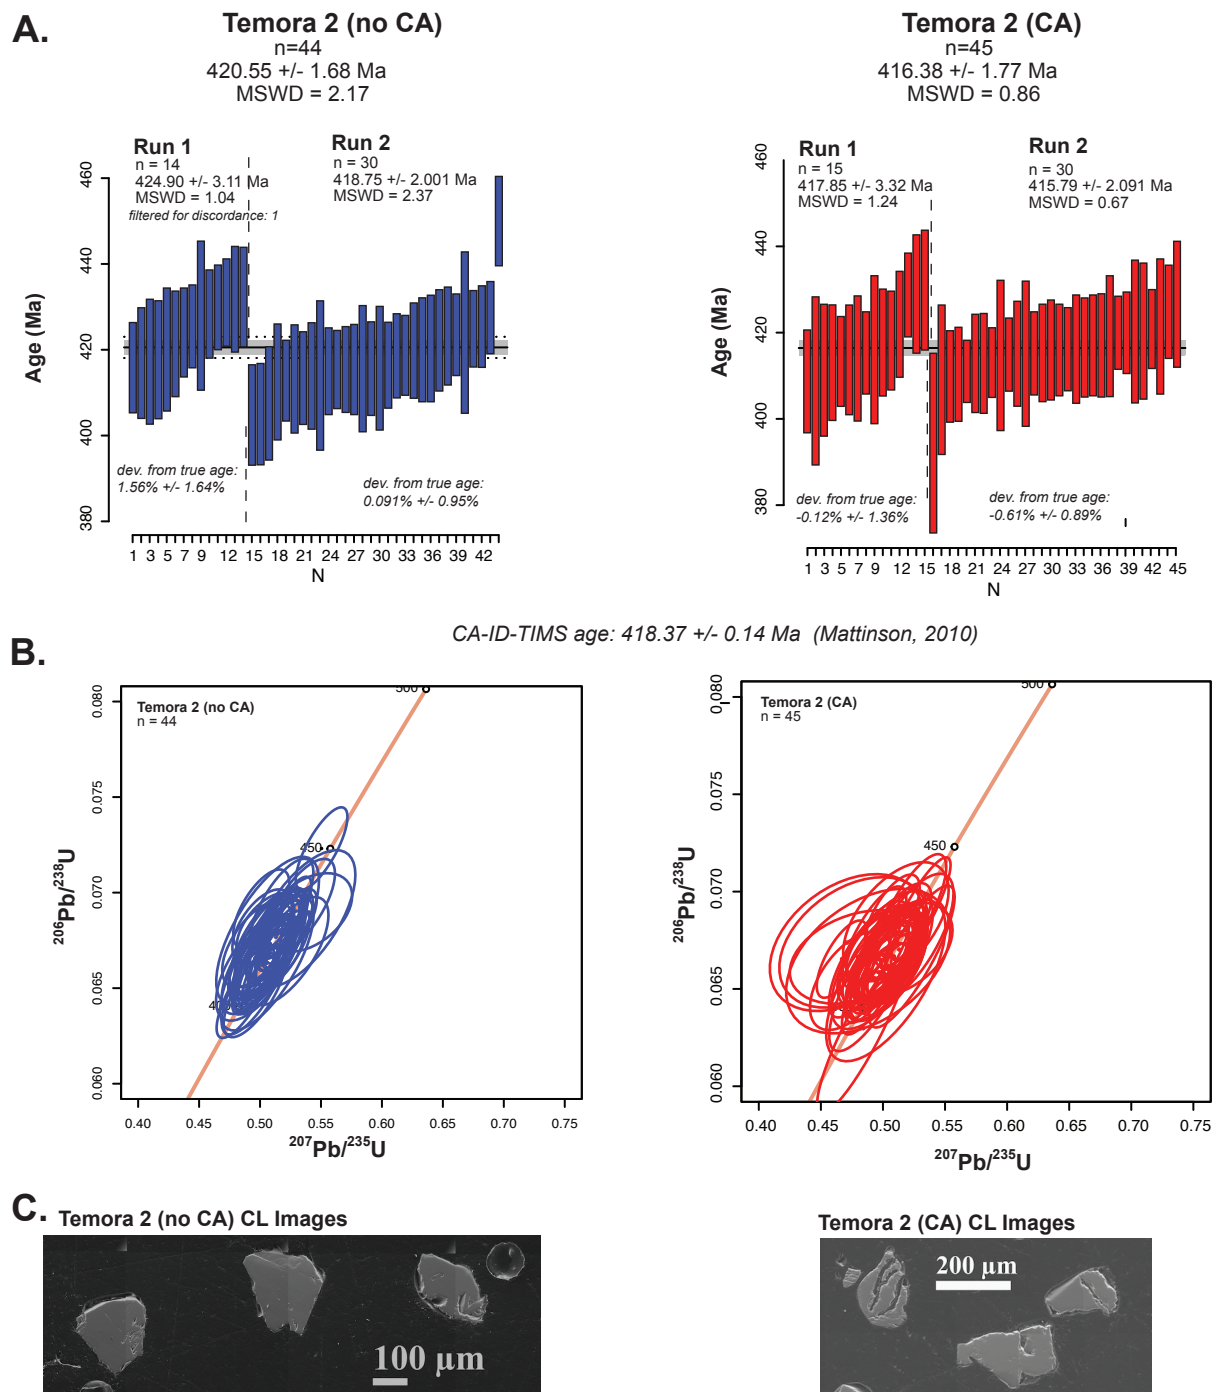

**Figure S5. A.** Rank order plots show weighted mean calculations and the deviation from the CA-ID-TIMS age of individual runs for treated and untreated aliquots of reference material Temora 2. Reported as 2-sigma uncertainty. **B.** Concordia diagram of all U-Pb analyses for treated and untreated aliquots of Temora 2. **C.** Example CL images of treated and untreated aliquots of Temora 2.

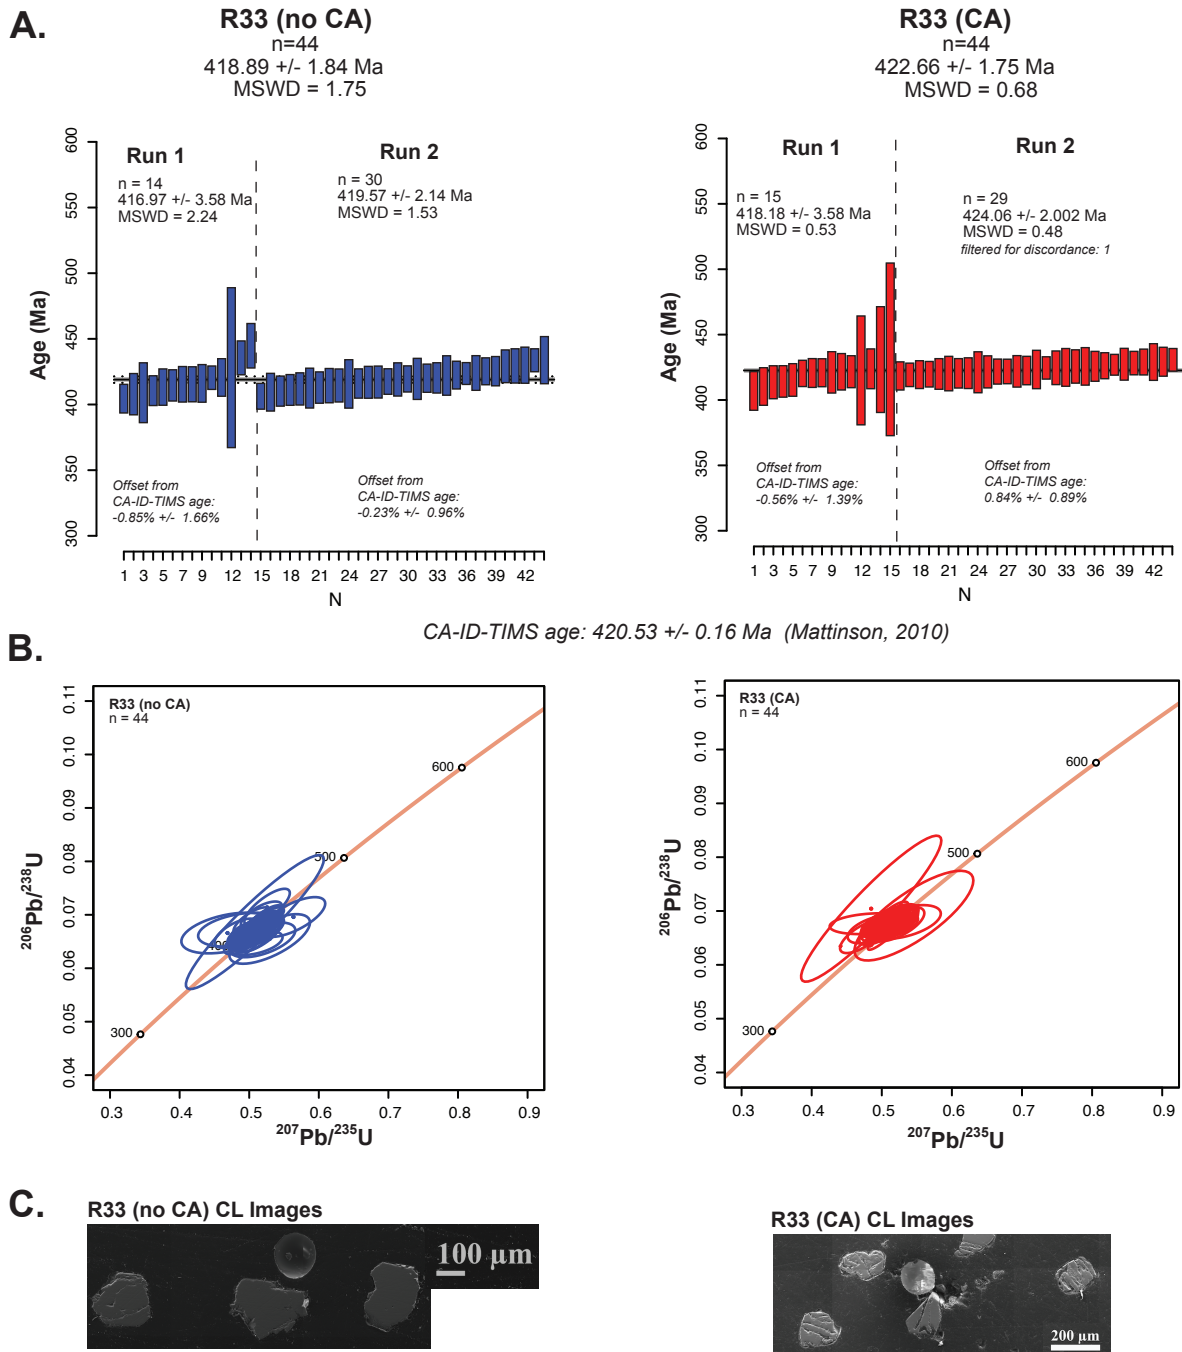

**Figure S6. A.** Rank order plots show weighted mean calculations and the deviation from the CA-ID-TIMS age of individual runs for treated and untreated aliquots of reference material R33. Reported as 2-sigma uncertainty. **B.** Concordia diagram of all U-Pb analyses for treated and untreated aliquots of R33. **C.** Example CL images of treated and untreated aliquots of R33.



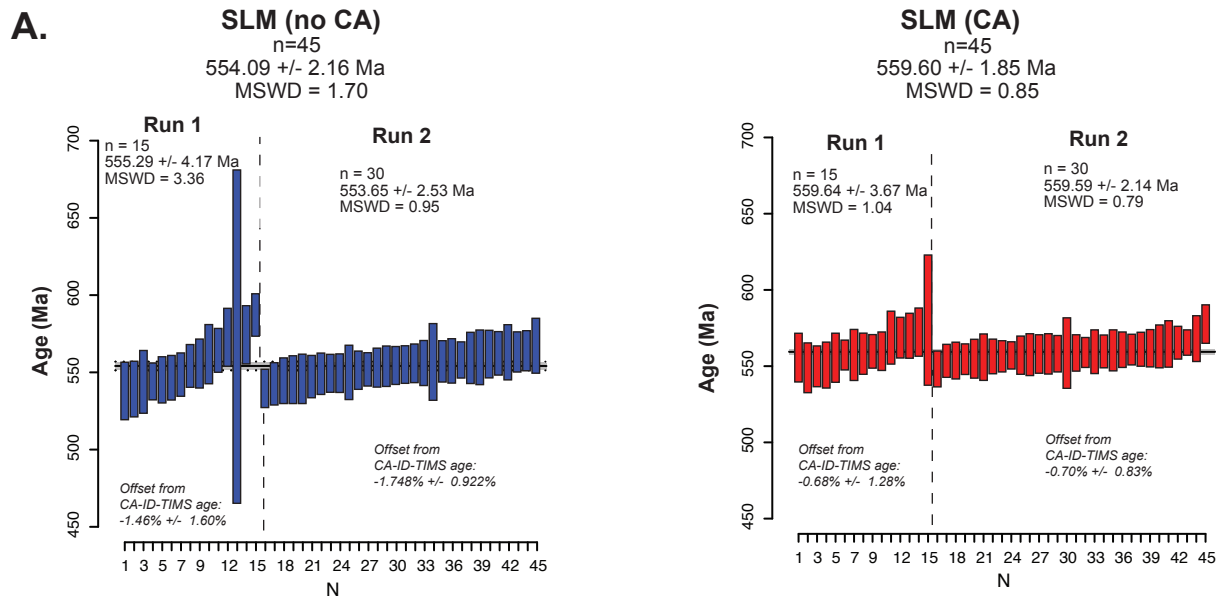

CA-ID-TIMS age: 563.5 +/- 3.2 Ma (Gehrels et al., 2008)

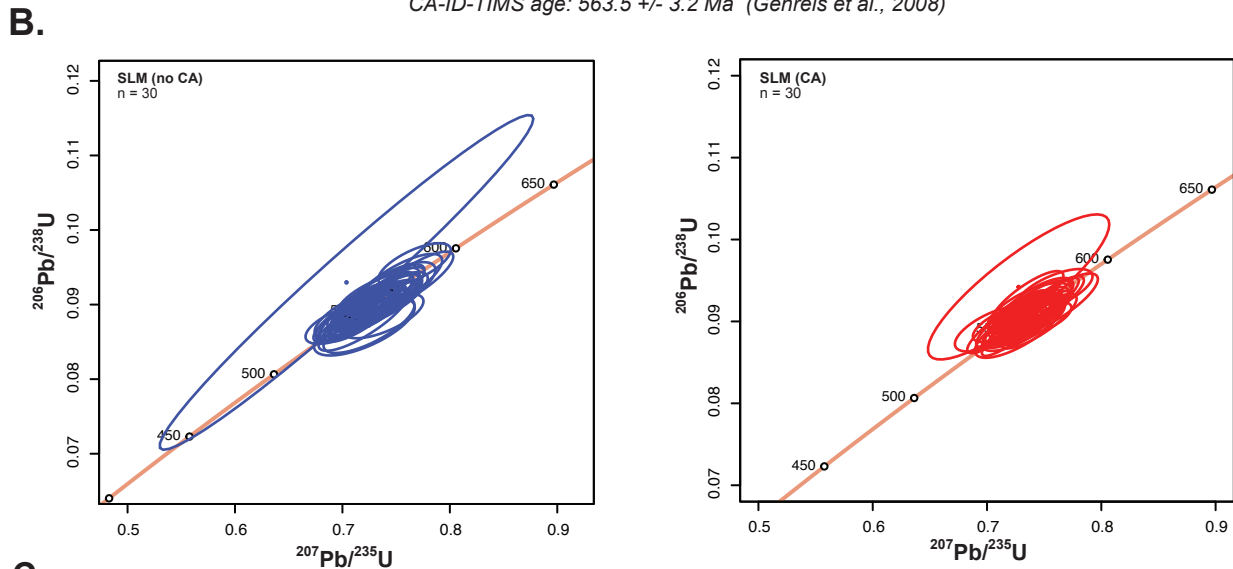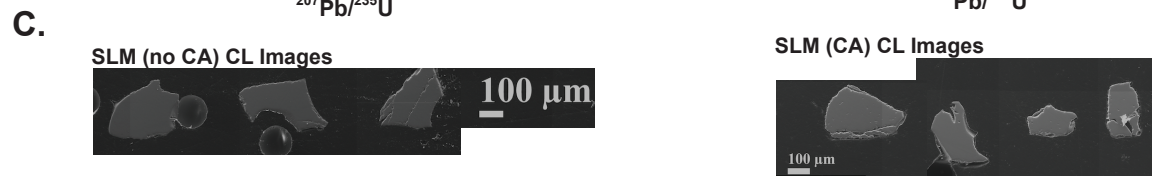

**Figure S7. A.** Rank order plots show weighted mean calculations and the deviation from the CA-ID-TIMS age of individual runs for treated and untreated aliquots of reference material SLM. Reported as 2-sigma uncertainty. **B.** Concordia diagram of all U-Pb analyses for treated and untreated aliquots of SLM. **C.** Example CL images of treated and untreated aliquots of SLM.

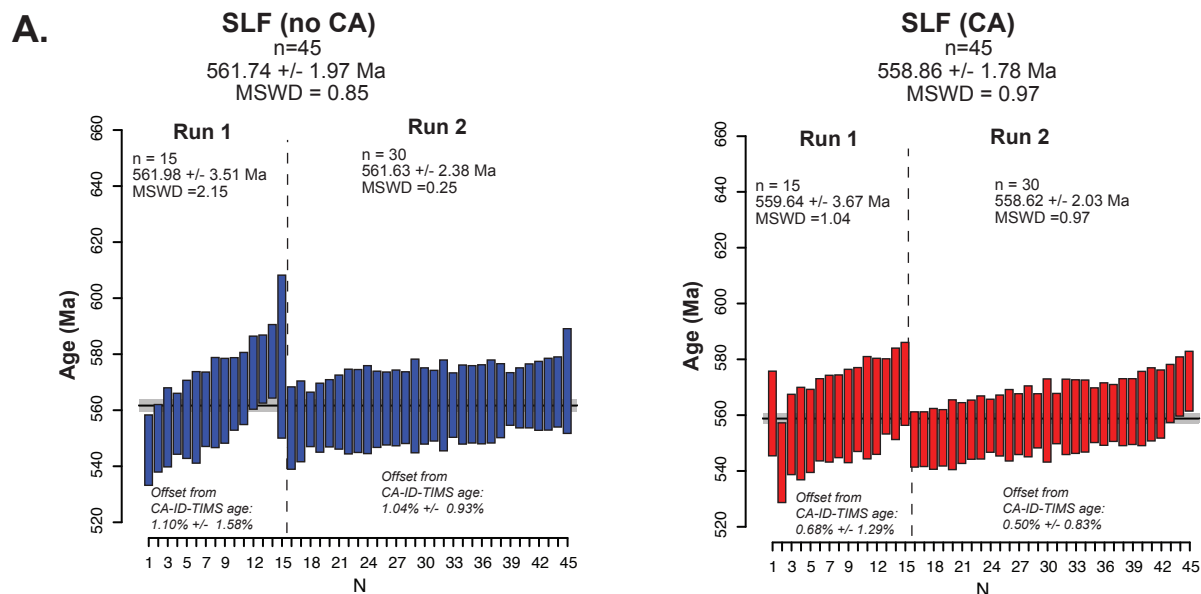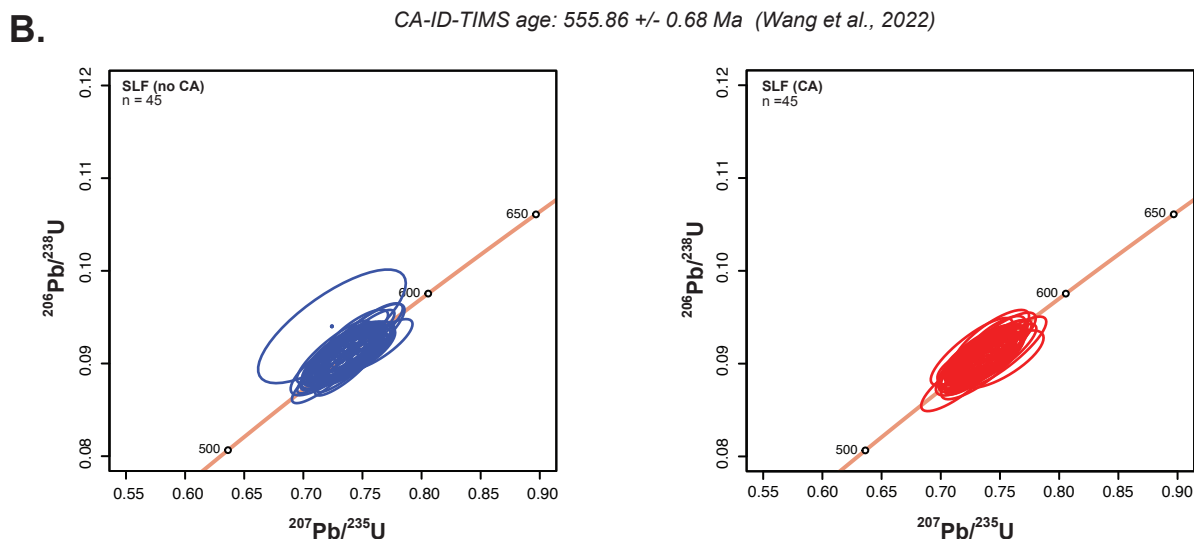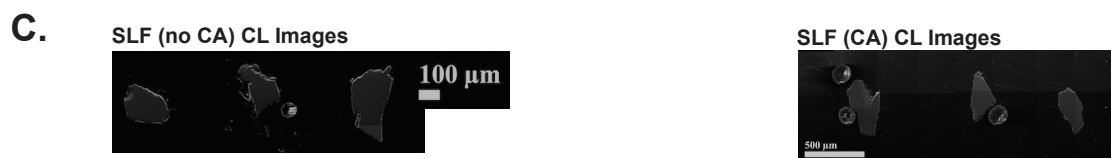

**Figure S8. A.** Rank order plots show weighted mean calculations and the deviation from the CA-ID-TIMS age of individual runs for treated and untreated aliquots of reference material SLF. Reported as 2-sigma uncertainty. **B.** Concordia diagram of all U-Pb analyses for treated and untreated aliquots of SLF. **C.** Example CL images of treated and untreated aliquots of SLF.

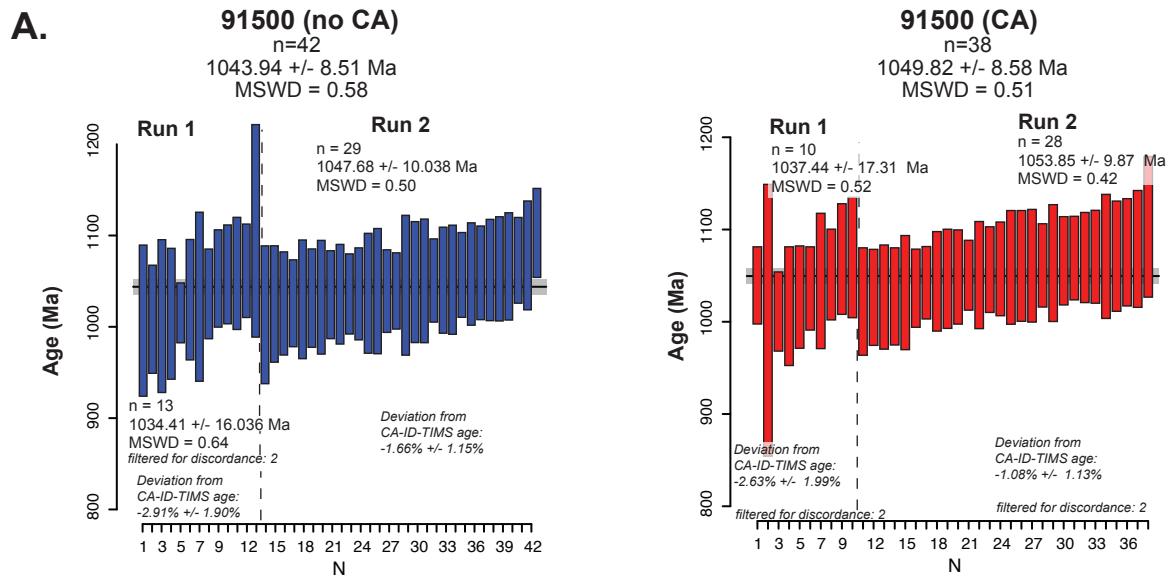

CA-ID-TIMS age: 1065.4 +/- 0.3 Ma (Wiedenbeck et al., 1995)

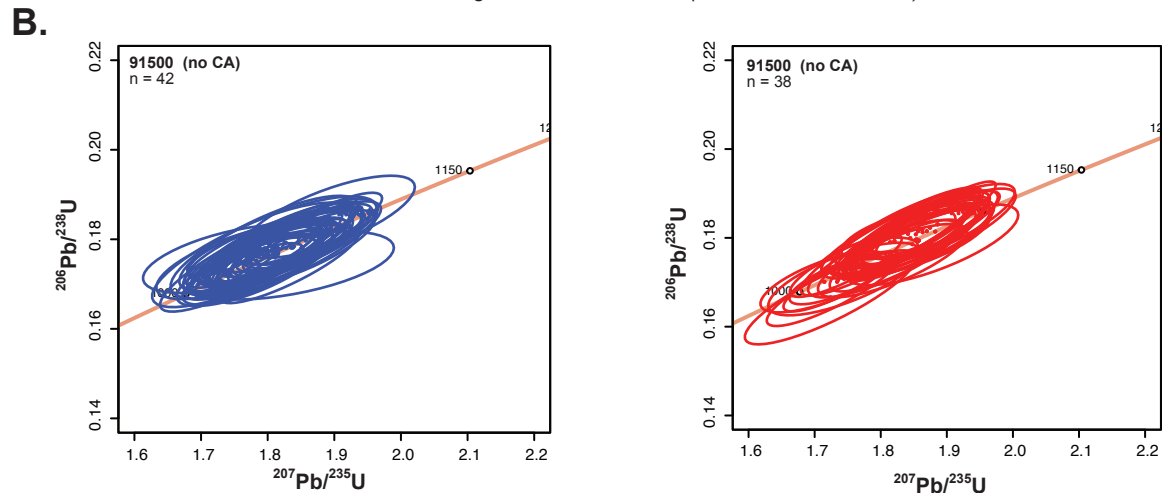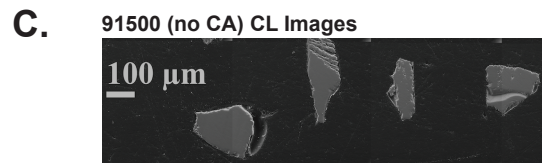

**Figure S9. A.** Rank order plots show weighted mean calculations and the deviation from the CA-ID-TIMS age of individual runs for treated and untreated aliquots of reference material 91500. Reported as 2-sigma uncertainty. **B.** Concordia diagram of all U-Pb analyses for treated and untreated aliquots of 91500. **C.** Example CL images of untreated aliquot of 91500; no available imaging for the treated aliquot of 91500.

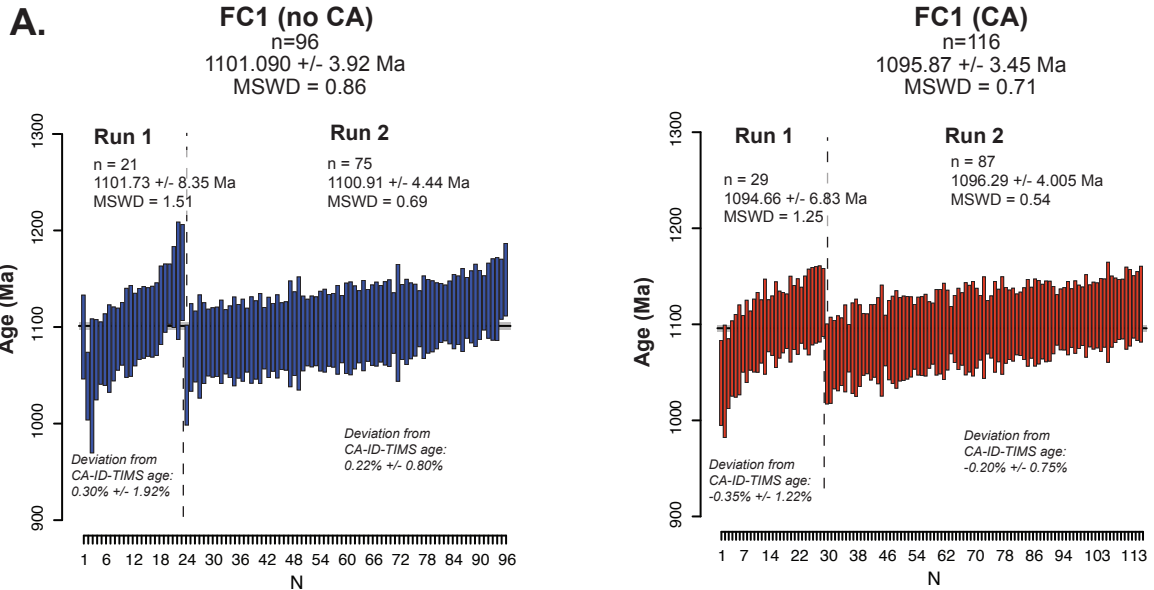

CA-ID-TIMS age: 1098.47 +/- 0.16 Ma (Mattinson, 2010)

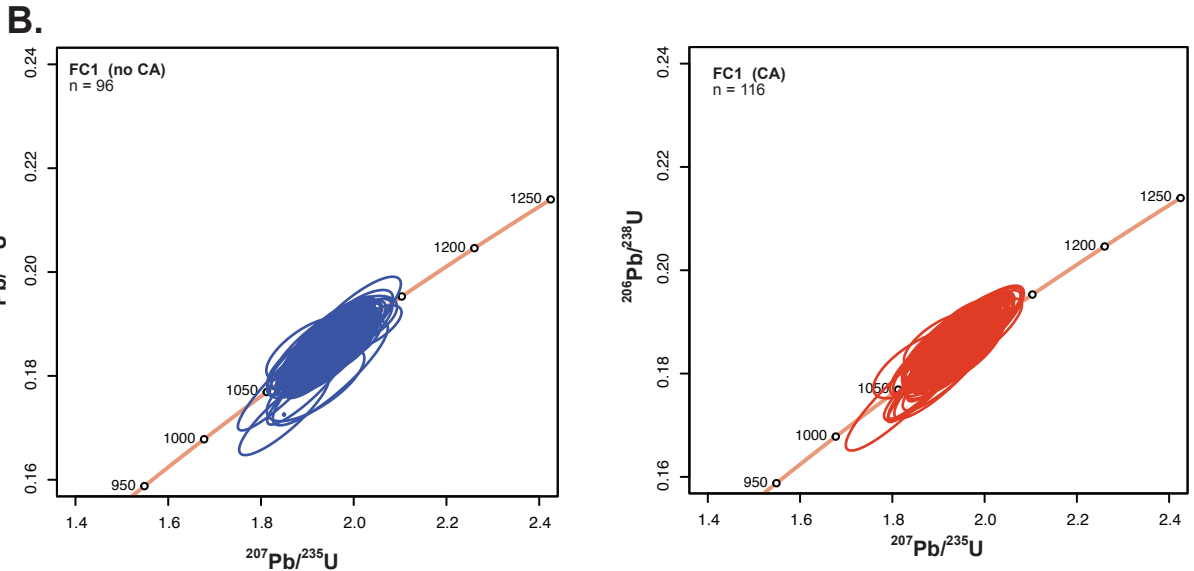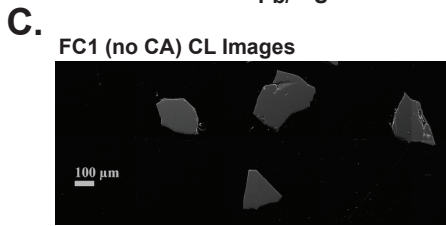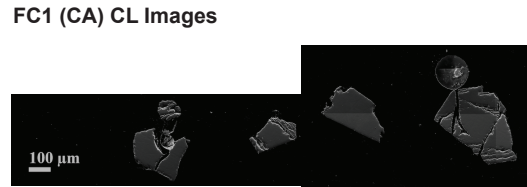

**Figure S10.** **A.** Rank order plots show weighted mean calculations and the deviation from the CA-ID-TIMS age of individual runs for treated and untreated aliquots of reference material FC1. Reported as 2-sigma uncertainty. **B.** Concordia diagram of all U-Pb analyses for treated and untreated aliquots of FC1. **C.** Example CL images of treated and untreated aliquots of FC1.

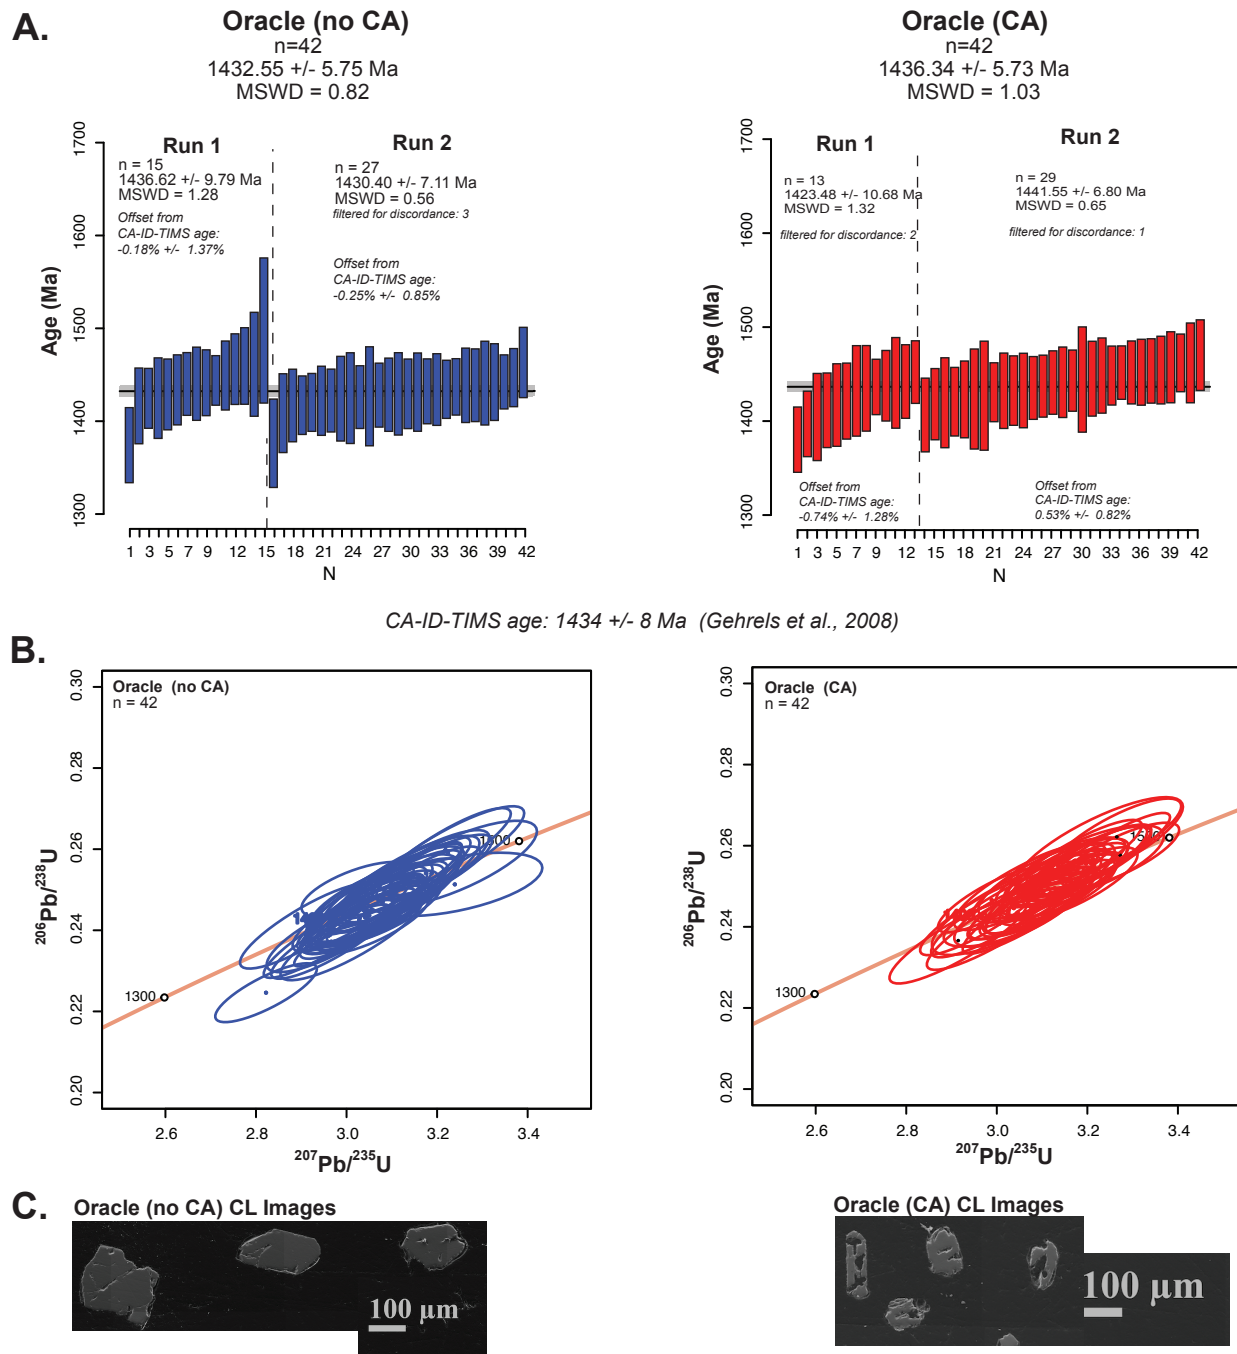

**Figure S11. A.** Rank order plots show weighted mean calculations and the deviation from the CA-ID-TIMS age of individual runs for treated and untreated aliquots of reference material Oracle. Reported as 2-sigma uncertainty. **B.** Concordia diagram of all U-Pb analyses for treated and untreated aliquots of Oracle. **C.** Example CL images of treated and untreated aliquots of Oracle.

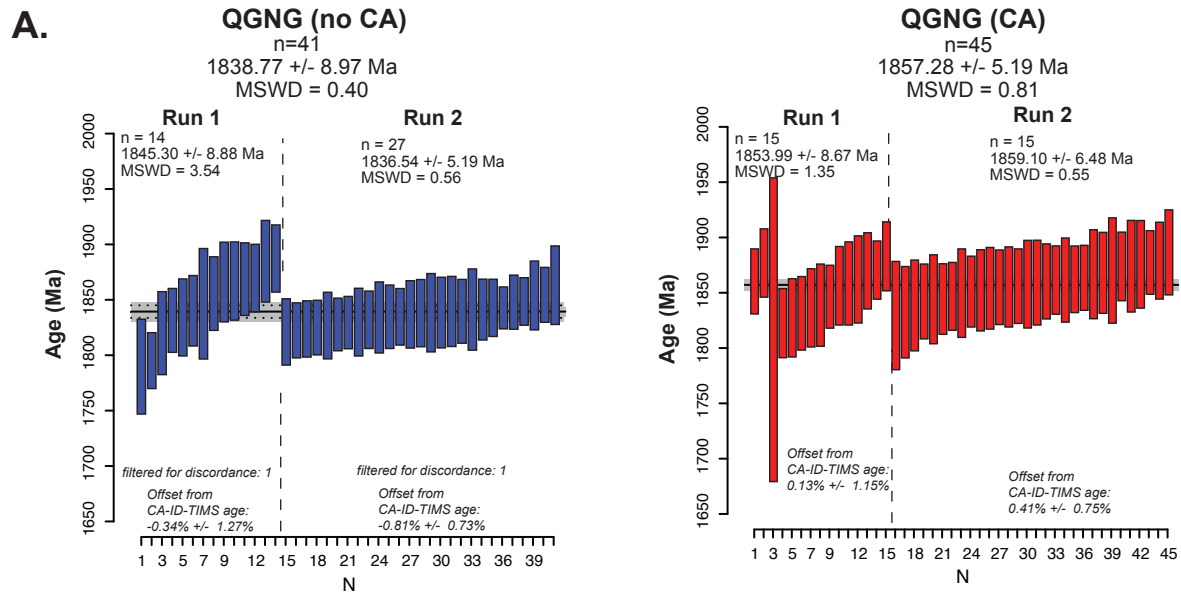

**B.** CA-ID-TIMS age: 1851.6 +/- 0.6 Ma (Black et al., 2004)

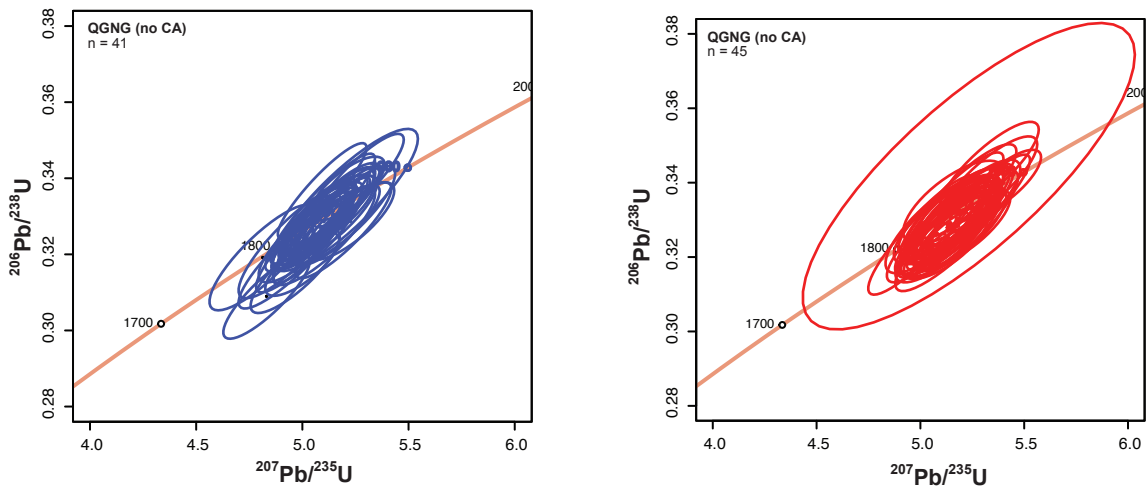

**C.** QNGG (no CA) CL Images

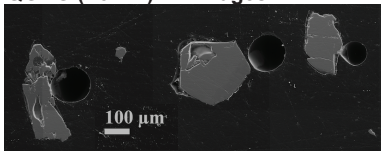

QNGG (CA) CL Images

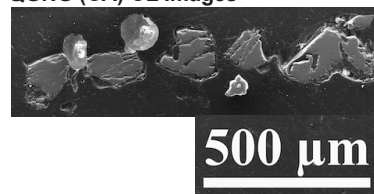

**Figure S12.** **A.** Rank order plots show weighted mean calculations and the deviation from the CA-ID-TIMS age of individual runs for treated and untreated aliquots of reference material QNGG. Reported in 2-sigma uncertainty. **B.** Concordia diagram of all U-Pb analyses for treated and untreated aliquots of QNGG. **C.** Example CL images of treated and untreated aliquots of QNGG.

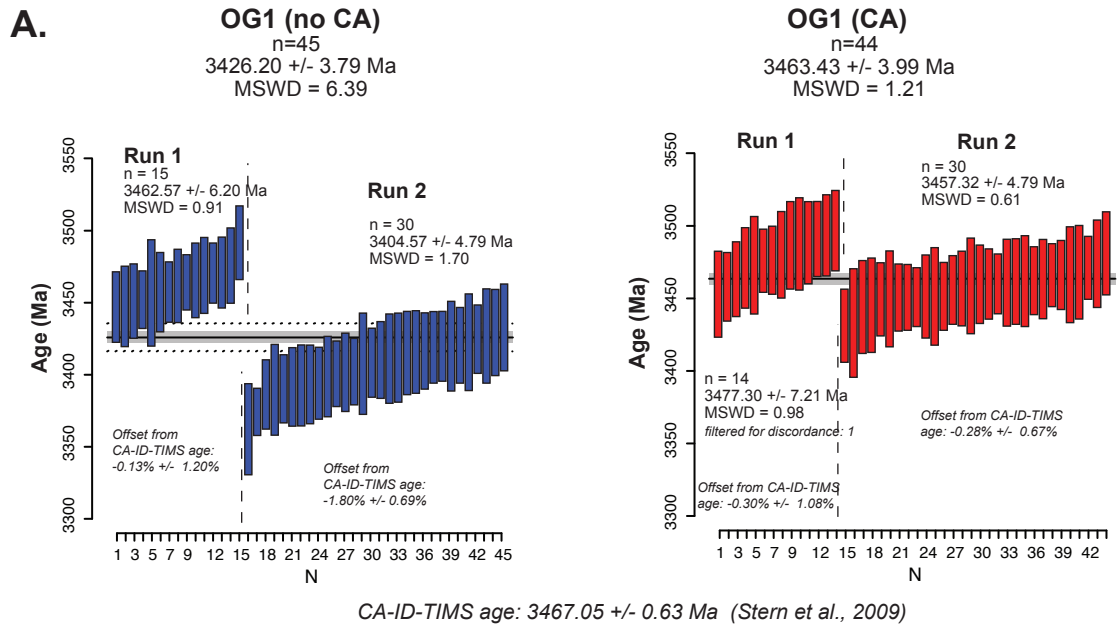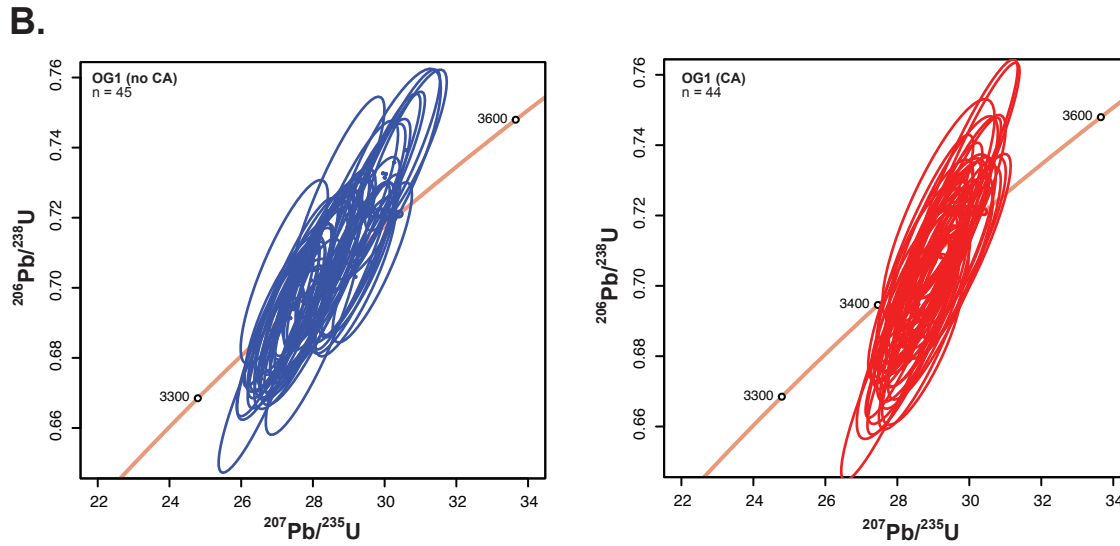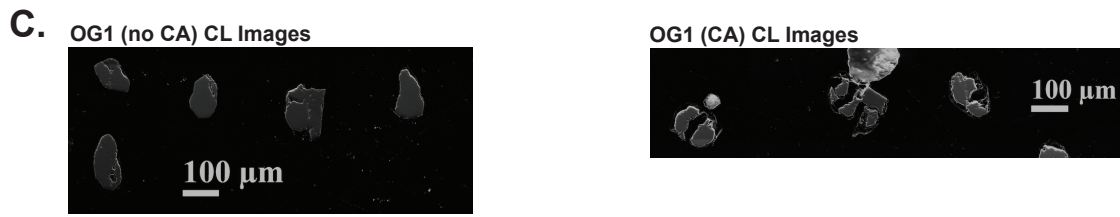

**Figure S13. A.** Rank order plots show weighted mean calculations and the deviation from the CA-ID-TIMS age of individual runs for treated and untreated aliquots of reference material OG1. Reported as 2-sigma uncertainty. **B.** Concordia diagram of all U-Pb analyses for treated and untreated aliquots of OG1. **C.** Example CL images of treated and untreated aliquots of OG1.

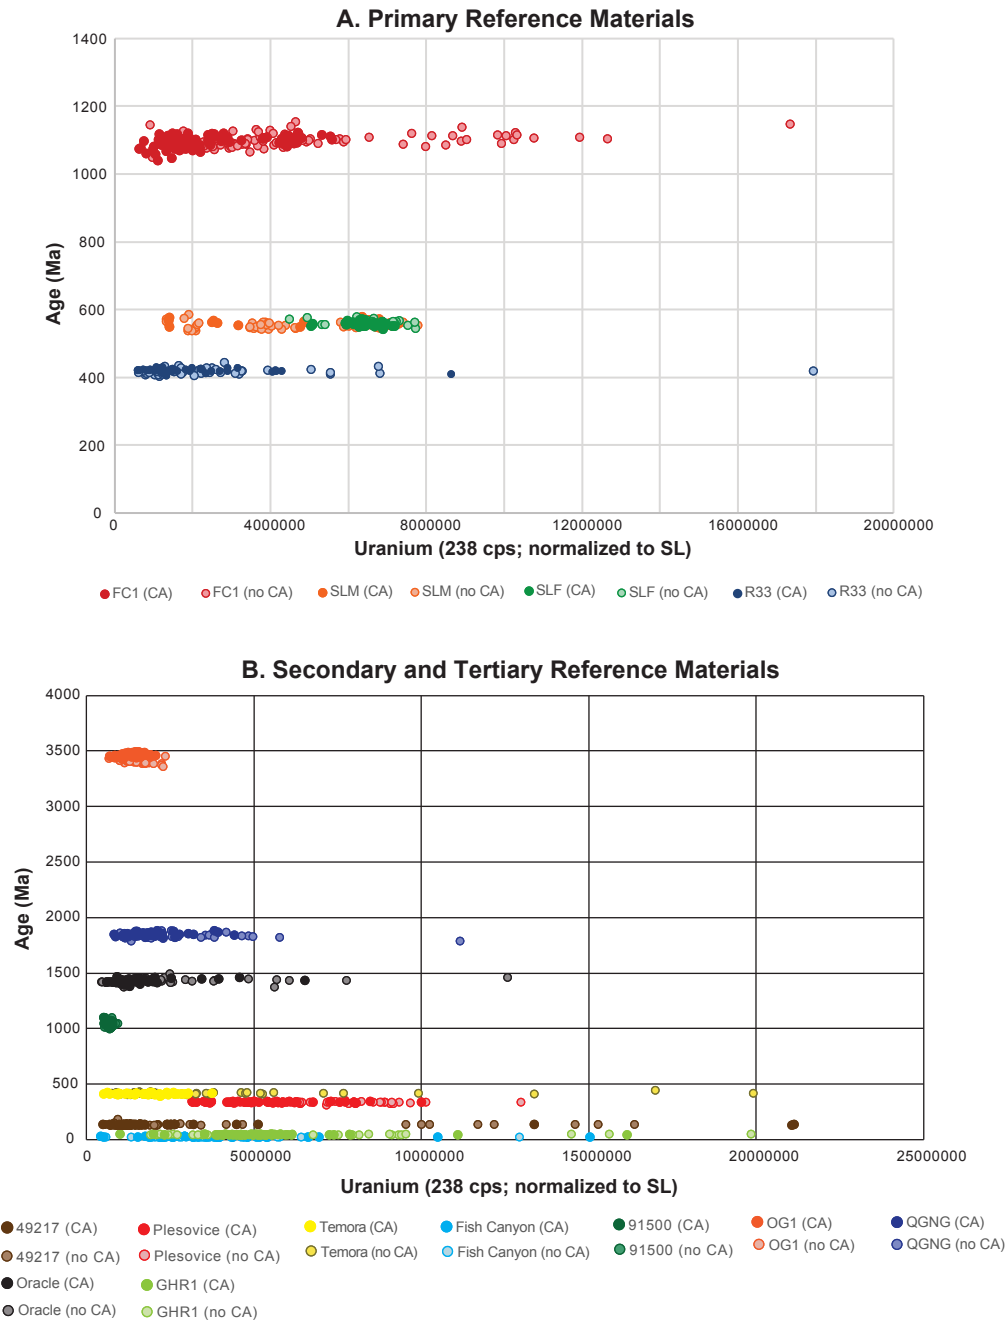

**Figure S14.** **A.** Scatter plot of uranium (238 cps; normalized to SL) plotted against the age (Ma) for both treated and untreated aliquots of primary reference materials. The age for SLM, SLF, and R33 is the  $^{206}\text{Pb}/^{238}\text{U}$  age whereas the best age for FC1 is the  $^{207}\text{Pb}/^{206}\text{Pb}$  age. The 238U cps for the treated and untreated aliquots of R33 and FC1 overlap, but there is a clear distinction of treated aliquots having overall lower 238 U cps. However, in both of the treated aliquots of SLM and SLF,  $^{238}\text{U}$  cps overlaps and is broadly similar. **B.** Scatter plot of uranium (238 cps; normalized to SL) plotted against the age (Ma) for both treated and untreated aliquots of secondary and tertiary reference materials. Ages are defined as the  $^{206}\text{Pb}/^{238}\text{U}$  or  $^{207}\text{Pb}/^{206}\text{Pb}$  age in Figure 1.  $^{238}\text{U}$  cps for the treated and untreated aliquots of all reference materials overlap and are similar, but there is a clear proportion of treated aliquots that contain less  $^{238}\text{U}$  than the untreated aliquot.



**TABLE S1: FISH CANYON LA-ICPMS U-Pb ZIRCON GEOCHRONOLOGY**

| Zircon #                                    | Composition |                    |              |                  |        |      |                 |                 | Ages        |                  |               |                   |      |       |      |       |       |        |
|---------------------------------------------|-------------|--------------------|--------------|------------------|--------|------|-----------------|-----------------|-------------|------------------|---------------|-------------------|------|-------|------|-------|-------|--------|
|                                             | U (238 cps) | U (norm) (238 cps) | 206Pb/ 204Pb | 206Pb/ 207Pb (%) | U/Th   | 2σ   | 207Pb/ 235U (%) | 206Pb/ 238U (%) | error corr. | 206Pb/ 238U (Ma) | 207Pb 2σ (Ma) | 206Pb/ 207Pb (Ma) | %    | Disc. |      |       |       |        |
| <b>Fish Canyon no CA Run 1</b>              |             |                    |              |                  |        |      |                 |                 |             |                  |               |                   |      |       |      |       |       |        |
| Fish Canyon-1                               | 5040630     | 5765998            | 3013         | 2.27             | 19.391 | 5.8  | 0.0307          | 7.6             | 0.00432     | 4.9              | 0.640         | 27.8              | 1.3  | 30.7  | 2.3  | 265.4 | 134.2 | 89.5   |
| Fish Canyon-2                               | 4112037     | 4703775            | 757          | 2.55             | 29.950 | 20.6 | 0.0212          | 22.9            | 0.00461     | 10.1             | 0.439         | 29.7              | 3.0  | 21.3  | 4.8  | NA    | NA    | NA     |
| Fish Canyon-3                               | 3045263     | 3483489            | 879          | 1.18             | 25.229 | 29.4 | 0.0240          | 30.9            | 0.00439     | 9.7              | 0.313         | 28.2              | 2.7  | 24.1  | 7.4  | NA    | NA    | NA     |
| Fish Canyon-5                               | 2162837     | 2474078            | 1070         | 2.40             | 25.905 | 11.3 | 0.0253          | 14.1            | 0.00476     | 8.4              | 0.598         | 30.6              | 2.6  | 25.4  | 3.5  | NA    | NA    | NA     |
| Fish Canyon-6                               | 2297646     | 2628287            | 920          | 2.28             | 28.107 | 15.7 | 0.0237          | 18.8            | 0.00484     | 10.3             | 0.551         | 31.1              | 3.2  | 23.8  | 4.4  | NA    | NA    | NA     |
| Fish Canyon-8                               | 3794239     | 4340245            | 1699         | 2.33             | 22.244 | 21.0 | 0.0307          | 23.4            | 0.00495     | 10.3             | 0.441         | 31.8              | 3.3  | 30.7  | 7.1  | NA    | NA    | NA     |
| <b>Fish Canyon no CA Run 1 (discordant)</b> |             |                    |              |                  |        |      |                 |                 |             |                  |               |                   |      |       |      |       |       |        |
| Fish Canyon-4                               | 1178832     | 1348471            | 1251         | 1.16             | 24.164 | 14.4 | 0.0360          | 44.6            | 0.00632     | 42.2             | 0.947         | 40.6              | 17.1 | 35.9  | 15.7 | NA    | NA    | NA     |
| Fish Canyon-7                               | 1372434     | 1569932            | 5689         | 2.34             | 11.017 | 28.4 | 0.0678          | 32.5            | 0.00542     | 15.8             | 0.487         | 34.8              | 5.5  | 66.6  | 20.9 | ##### | 543.5 | 97.6   |
| Fish Canyon-9                               | 1708061     | 1953858            | 397          | 1.40             | 29.335 | 26.8 | 0.0237          | 31.6            | 0.00505     | 16.6             | 0.528         | 32.5              | 5.4  | 23.8  | 7.4  | NA    | NA    | NA     |
| Fish Canyon-10                              | 3963333     | 4533673            | 1134         | 2.12             | 23.796 | 12.0 | 0.0240          | 17.3            | 0.00415     | 12.5             | 0.719         | 26.7              | 3.3  | 24.1  | 4.1  | NA    | NA    | NA     |
| Fish Canyon-11                              | 1387136     | 1586750            | 189          | 2.52             | 36.304 | 56.2 | 0.0185          | 58.6            | 0.00488     | 16.8             | 0.287         | 31.4              | 5.3  | 18.6  | 10.8 | NA    | NA    | NA     |
| Fish Canyon-12                              | 2832561     | 3240178            | 33433        | 2.65             | 19.317 | 10.5 | 0.0365          | 17.0            | 0.00511     | 13.4             | 0.786         | 32.9              | 4.4  | 36.4  | 6.1  | 274.2 | 241.2 | 88.0   |
| Fish Canyon-13                              | 2671006     | 3055375            | 413          | 1.15             | 53.117 | 28.7 | 0.0127          | 30.3            | 0.00489     | 9.8              | 0.324         | 31.5              | 3.1  | 12.8  | 3.9  | NA    | NA    | NA     |
| Fish Canyon-14                              | 2660762     | 3043657            | 575          | 1.53             | 18.765 | 42.2 | 0.0374          | 43.4            | 0.00509     | 10.1             | 0.233         | 32.8              | 3.3  | 37.3  | 15.9 | 340.2 | NA    | 90.4   |
| Fish Canyon-15                              | 1219797     | 1395330            | 191          | 1.22             | 21.003 | 42.1 | 0.0297          | 44.7            | 0.00452     | 15.1             | 0.338         | 29.1              | 4.4  | 29.7  | 13.1 | 79.0  | NA    | 63.2   |
| <b>Fish Canyon no CA Run 2</b>              |             |                    |              |                  |        |      |                 |                 |             |                  |               |                   |      |       |      |       |       |        |
| FishC_1                                     | 4238744     | 3987903            | 26992        | 1.48             | 22.042 | 6.5  | 0.0273          | 7.6             | 0.0044      | 4                | 0.519         | 28.1              | 1.1  | 27.4  | 2.1  | 36.9  | 158   | 23.8   |
| FishC_10                                    | 4903328     | 4613158            | 29024        | 2.3              | 21.458 | 6.4  | 0.0276          | 7.2             | 0.0043      | 3.3              | 0.463         | 27.7              | 0.9  | 27.7  | 2    | 27.9  | 152   | 0.7    |
| FishC_11                                    | 3904869     | 3673786            | 5000         | 2.41             | 22.175 | 12.7 | 0.0269          | 12.9            | 0.0043      | 2.5              | 0.197         | 27.9              | 0.7  | 27    | 3.4  | 51.5  | 308   | 45.8   |
| FishC_12                                    | 610796      | 574650             | 5000         | 2.43             | 21.207 | 17.1 | 0.03            | 18.4            | 0.0046      | 6.9              | 0.373         | 29.7              | 2    | 30    | 5.4  | 56    | 408   | 47.0   |
| FishC_13                                    | 3158272     | 2971372            | 5000         | 2.58             | 22.094 | 13   | 0.0278          | 13.4            | 0.0045      | 3.4              | 0.25          | 28.7              | 1    | 27.8  | 3.7  | 42.7  | 316   | 32.8   |
| FishC_14                                    | 1.4E+07     | 12922341           | 24959        | 0.46             | 21.088 | 5.2  | 0.0301          | 5.9             | 0.0046      | 2.8              | 0.466         | 29.6              | 0.8  | 30.1  | 1.8  | 69.3  | 125   | 57.3   |
| FishC_15                                    | 4153965     | 3908141            | 5000         | 1.67             | 23.371 | 12.1 | 0.0274          | 12.4            | 0.0046      | 2.8              | 0.228         | 29.8              | 0.8  | 27.4  | 3.3  | 500   | 1     | 94.0   |
| FishC_16                                    | 3793071     | 3568604            | 53203        | 1.9              | 21.802 | 8    | 0.0278          | 8.8             | 0.0044      | 3.5              | 0.403         | 28.3              | 1    | 27.9  | 2.4  | 10.4  | 194   | -172.1 |
| FishC_17                                    | 2701994     | 2542095            | 5000         | 0.94             | 16.566 | 19.7 | 0.0363          | 19.9            | 0.0044      | 2.8              | 0.141         | 28.1              | 0.8  | 36.2  | 7.1  | 615.7 | 427   | 95.4   |
| FishC_18                                    | 6990256     | 6576586            | 5000         | 0.51             | 22.699 | 12   | 0.0283          | 12.3            | 0.0047      | 2.3              | 0.187         | 30                | 0.7  | 28.3  | 3.4  | 108.8 | 297   | 72.4   |
| FishC_19                                    | 2940183     | 2766189            | 4E+05        | 1.51             | 21.113 | 7.5  | 0.0283          | 8.3             | 0.0043      | 3.5              | 0.421         | 27.9              | 1    | 28.3  | 2.3  | 66.5  | 180   | 58.0   |
| FishC_2                                     | 2006183     | 1887461            | 5000         | 2.93             | 22.027 | 12   | 0.028           | 12.7            | 0.0045      | 4                | 0.318         | 28.8              | 1.2  | 28    | 3.5  | 35.2  | 292   | 18.2   |
| FishC_20                                    | 4974802     | 4680403            | 5000         | 1.67             | 21.807 | 11.6 | 0.0277          | 12              | 0.0044      | 3.3              | 0.277         | 28.2              | 0.9  | 27.7  | 3.3  | 10.9  | 280   | -158.7 |
| FishC_21                                    | 2255158     | 2121702            | 5000         | 2.41             | 22.722 | 14.9 | 0.0264          | 15.2            | 0.0044      | 2.9              | 0.191         | 28                | 0.8  | 26.5  | 4    | 111.2 | 368   | 74.8   |
| FishC_23                                    | 3445056     | 3241184            | 5000         | 2.52             | 22.19  | 12.8 | 0.0275          | 13.3            | 0.0044      | 3.5              | 0.264         | 28.5              | 1    | 27.6  | 3.6  | 53.2  | 313   | 46.4   |
| FishC_24                                    | 1405972     | 1322769            | 47240        | 1.17             | 18.989 | 12.6 | 0.0318          | 13.4            | 0.0044      | 4.6              | 0.34          | 28.2              | 1.3  | 31.8  | 4.2  | 313.2 | 288   | 91.0   |
| FishC_25                                    | 3563800     | 3352901            | 5000         | 2.4              | 22.313 | 12.9 | 0.0272          | 13.5            | 0.0044      | 3.7              | 0.276         | 28.3              | 1    | 27.2  | 3.6  | 66.6  | 316   | 57.5   |
| FishC_26                                    | 2669952     | 2511949            | 45799        | 2.96             | 21.814 | 9.6  | 0.028           | 10              | 0.0044      | 2.8              | 0.281         | 28.5              | 0.8  | 28.1  | 2.8  | 11.8  | 232   | -141.5 |
| FishC_27                                    | 4026274     | 3788007            | 5000         | 1.85             | 23.196 | 13   | 0.0263          | 13.6            | 0.0044      | 3.7              | 0.275         | 28.5              | 1.1  | 26.4  | 3.5  | 162.3 | 325   | 82.4   |
| FishC_28                                    | 6047682     | 5689792            | 5000         | 1.4              | 22.703 | 12.2 | 0.0271          | 12.5            | 0.0045      | 2.9              | 0.232         | 28.7              | 0.8  | 27.1  | 3.3  | 109.2 | 300   | 73.7   |
| FishC_29                                    | 5707887     | 5370105            | 5000         | 1.46             | 21.892 | 11.8 | 0.0273          | 12.1            | 0.0043      | 2.8              | 0.227         | 27.8              | 0.8  | 27.3  | 3.3  | 20.3  | 286   | -36.9  |

|          |         |         |       |      |        |      |        |      |        |     |       |      |     |      |     |       |     |       |
|----------|---------|---------|-------|------|--------|------|--------|------|--------|-----|-------|------|-----|------|-----|-------|-----|-------|
| FishC_3  | 3015839 | 2837367 | 5000  | 2.46 | 21.35  | 13   | 0.0286 | 13.2 | 0.0044 | 2.6 | 0.193 | 28.5 | 0.7 | 28.7 | 3.7 | 39.9  | 311 | 28.6  |
| FishC_30 | 4638686 | 4364177 | 73929 | 1.64 | 21.906 | 6.4  | 0.0285 | 7.1  | 0.0045 | 2.9 | 0.412 | 29.1 | 0.8 | 28.5 | 2   | 22    | 156 | -32.3 |
| FishC_4  | 3754909 | 3532701 | 5000  | 2.27 | 20.639 | 12.1 | 0.0289 | 12.4 | 0.0043 | 2.6 | 0.213 | 27.8 | 0.7 | 28.9 | 3.5 | 120.3 | 285 | 76.9  |
| FishC_5  | 2155853 | 2028274 | 5000  | 1.01 | 21.906 | 13.6 | 0.028  | 14.3 | 0.0044 | 4.4 | 0.31  | 28.6 | 1.3 | 28   | 3.9 | 21.9  | 328 | -30.6 |
| FishC_6  | 6811185 | 6408112 | 5000  | 1.7  | 22.424 | 11.6 | 0.027  | 12   | 0.0044 | 3.1 | 0.254 | 28.3 | 0.9 | 27.1 | 3.2 | 78.8  | 285 | 64.1  |
| FishC_8  | 3734281 | 3513293 | 5000  | 2.32 | 22.716 | 12.4 | 0.0271 | 13   | 0.0045 | 4.1 | 0.317 | 28.7 | 1.2 | 27.1 | 3.5 | 110.6 | 305 | 74.1  |
| FishC_9  | 3617220 | 3403160 | 5000  | 2.45 | 22.292 | 11.3 | 0.0275 | 11.8 | 0.0045 | 3.3 | 0.276 | 28.6 | 0.9 | 27.5 | 3.2 | 64.4  | 277 | 55.6  |

**Fish Canyon no CA Run 2 (discordant)**

|          |         |         |      |      |        |      |        |      |        |     |       |      |     |      |     |       |     |      |
|----------|---------|---------|------|------|--------|------|--------|------|--------|-----|-------|------|-----|------|-----|-------|-----|------|
| FishC_22 | 709115  | 667151  | 5000 | 2.98 | 2.256  | 8.4  | 0.5751 | 9.7  | 0.0094 | 5   | 0.511 | 60.4 | 3   | 461  | 36  | 4062  | 125 | 98.5 |
| FishC_7  | 1551183 | 1459387 | 5000 | 2.03 | 20.618 | 16.6 | 0.0289 | 17.1 | 0.0043 | 4.3 | 0.251 | 27.8 | 1.2 | 28.9 | 4.9 | 122.7 | 392 | 77.3 |

**Composition**

**Ages**

| Zircon | U         | U (norm)  | 206Pb/ U/Th | 206Pb/ 2σ | 207Pb/ 2σ | 206Pb/ 2σ | error | 206Pb/ 2σ | 207Pb 2σ  | 206Pb/ 2σ  | %     |
|--------|-----------|-----------|-------------|-----------|-----------|-----------|-------|-----------|-----------|------------|-------|
| #      | (238 cps) | (238 cps) | 204Pb       | 207Pb (%) | 235U (%)  | 238U (%)  | corr. | 238U (Ma) | 235U (Ma) | 207Pb (Ma) | Disc. |

**Fish Canyon CA Run 1**

|                |         |          |       |      |        |      |        |      |         |      |       |      |     |      |     |       |       |       |
|----------------|---------|----------|-------|------|--------|------|--------|------|---------|------|-------|------|-----|------|-----|-------|-------|-------|
| Fish Canyon-2  | 1318522 | 1736201  | 2104  | 1.27 | 18.450 | 12.5 | 0.0378 | 17.3 | 0.00507 | 12.0 | 0.690 | 32.6 | 3.9 | 37.7 | 6.4 | 378.4 | 282.4 | 91.4  |
| Fish Canyon-3  | 2221601 | 2925357  | 10945 | 1.47 | 21.471 | 7.6  | 0.0309 | 11.4 | 0.00481 | 8.5  | 0.743 | 31.0 | 2.6 | 30.9 | 3.5 | 26.4  | NA    | -17.1 |
| Fish Canyon-4  | 5263627 | 6931033  | 1171  | 1.59 | 23.211 | 11.8 | 0.0266 | 12.4 | 0.00448 | 3.9  | 0.313 | 28.8 | 1.1 | 26.7 | 3.3 | NA    | NA    |       |
| Fish Canyon-6  | 1.1E+07 | 15019407 | 31562 | 0.37 | 19.802 | 5.5  | 0.0321 | 6.1  | 0.00461 | 2.6  | 0.434 | 29.7 | 0.8 | 32.1 | 1.9 | 217.1 | 126.9 | 86.3  |
| Fish Canyon-7  | 3651500 | 4808218  | ##### | 2.41 | 20.147 | 8.2  | 0.0318 | 10.1 | 0.00464 | 5.9  | 0.585 | 29.9 | 1.8 | 31.7 | 3.2 | 176.9 | 191.4 | 83.1  |
| Fish Canyon-9  | 2952057 | 3887206  | 2132  | 2.31 | 21.754 | 7.1  | 0.0280 | 8.0  | 0.00442 | 3.6  | 0.457 | 28.4 | 1.0 | 28.0 | 2.2 | NA    | NA    |       |
| Fish Canyon-10 | 3614518 | 4759521  | 5000  | 0.60 | 15.501 | 13.9 | 0.0438 | 16.0 | 0.00492 | 7.9  | 0.495 | 31.7 | 2.5 | 43.5 | 6.8 | 757.5 | 294.6 | 95.8  |
| Fish Canyon-14 | 2214802 | 2916404  | 2607  | 2.62 | 22.845 | 8.2  | 0.0305 | 11.8 | 0.00506 | 8.5  | 0.721 | 32.6 | 2.8 | 30.5 | 3.5 | NA    | NA    |       |

**Fish Canyon CA Run 1 (discordant)**

|                |         |         |      |      |         |       |        |       |         |      |       |      |      |      |      |       |       |      |
|----------------|---------|---------|------|------|---------|-------|--------|-------|---------|------|-------|------|------|------|------|-------|-------|------|
| Fish Canyon-1  | 1315766 | 1732573 | 528  | 1.95 | 14.864  | 25.7  | 0.0431 | 27.5  | 0.00465 | 10.0 | 0.364 | 29.9 | 3.0  | 42.9 | 11.6 | 845.4 | 535.8 | 96.5 |
| Fish Canyon-5  | 690968  | 909852  | 335  | 1.11 | 160.018 | 442.8 | 0.0040 | 443.1 | 0.00469 | 14.3 | 0.032 | 30.2 | 4.3  | 4.1  | 18.1 | NA    | NA    |      |
| Fish Canyon-8  | 2103178 | 2769421 | 1896 | 0.90 | 27.441  | 11.1  | 0.0270 | 17.7  | 0.00537 | 13.7 | 0.776 | 34.5 | 4.7  | 27.0 | 4.7  | NA    | NA    |      |
| Fish Canyon-11 | 1170671 | 1541514 | 1069 | 3.08 | 16.495  | 23.0  | 0.0533 | 33.1  | 0.00638 | 23.8 | 0.720 | 41.0 | 9.7  | 52.7 | 17.0 | 624.9 | 496.9 | 93.4 |
| Fish Canyon-12 | 1514509 | 1994273 | 1824 | 2.71 | 26.782  | 8.5   | 0.0285 | 33.2  | 0.00553 | 32.0 | 0.966 | 35.6 | 11.4 | 28.5 | 9.3  | NA    | NA    |      |
| Fish Canyon-13 | 1185122 | 1560544 | 588  | 2.86 | 14.860  | 22.7  | 0.0427 | 25.1  | 0.00461 | 10.8 | 0.430 | 29.6 | 3.2  | 42.5 | 10.4 | 846.1 | 472.6 | 96.5 |
| Fish Canyon-15 | 1356812 | 1786621 | 675  | 0.57 | 31.296  | 26.0  | 0.0219 | 35.1  | 0.00496 | 23.6 | 0.672 | 31.9 | 7.5  | 22.0 | 7.6  | NA    | NA    |      |

**Fish Canyon CA Run 2**

|          |         |         |       |      |        |      |        |      |        |     |       |      |     |      |     |       |     |        |
|----------|---------|---------|-------|------|--------|------|--------|------|--------|-----|-------|------|-----|------|-----|-------|-----|--------|
| FishC 1  | 2462477 | 2198080 | 5000  | 0.89 | 22.441 | 12.7 | 0.028  | 13.4 | 0.0046 | 4.3 | 0.318 | 29.3 | 1.2 | 28   | 3.7 | 80.7  | 311 | 63.7   |
| FishC 10 | 2459175 | 2195132 | 5000  | 0.94 | 20.063 | 14.9 | 0.0309 | 15.4 | 0.0045 | 4   | 0.261 | 28.9 | 1.2 | 30.9 | 4.7 | 186.6 | 348 | 84.5   |
| FishC 11 | 2529805 | 2258179 | 5000  | 1.86 | 21.089 | 14   | 0.0302 | 14.6 | 0.0046 | 4.5 | 0.304 | 29.8 | 1.3 | 30.2 | 4.4 | 69.3  | 332 | 57.0   |
| FishC 12 | 6064197 | 5413082 | 5000  | 1.52 | 22.79  | 12.6 | 0.0273 | 13.3 | 0.0045 | 4.2 | 0.314 | 29   | 1.2 | 27.4 | 3.6 | 118.6 | 312 | 75.5   |
| FishC 13 | 5669624 | 5060874 | 82039 | 1.51 | 21.477 | 6.3  | 0.029  | 6.9  | 0.0045 | 2.8 | 0.411 | 29.1 | 0.8 | 29   | 2   | 25.7  | 151 | -13.2  |
| FishC 14 | 7432336 | 6634323 | 58895 | 1.01 | 21.819 | 4.3  | 0.0286 | 5.5  | 0.0045 | 3.3 | 0.612 | 29.1 | 1   | 28.6 | 1.5 | 12.3  | 105 | -136.6 |
| FishC 15 | 2908721 | 2596410 | 5000  | 0.91 | 22.245 | 13.8 | 0.0277 | 14.1 | 0.0045 | 3.2 | 0.226 | 28.8 | 0.9 | 27.7 | 3.9 | 59.2  | 336 | 51.4   |
| FishC 16 | 3544621 | 3164034 | 4E+05 | 1.33 | 20.9   | 7.6  | 0.0296 | 8.3  | 0.0045 | 3.2 | 0.386 | 28.8 | 0.9 | 29.6 | 2.4 | 90.6  | 181 | 68.2   |
| FishC 17 | 5779467 | 5158923 | 24103 | 1.09 | 21.234 | 6.3  | 0.0288 | 7.3  | 0.0044 | 3.7 | 0.504 | 28.5 | 1   | 28.8 | 2.1 | 52.9  | 151 | 46.1   |
| FishC 18 | 2560899 | 2285934 | 5000  | 1.99 | 23.725 | 12.6 | 0.0269 | 13.2 | 0.0046 | 3.9 | 0.296 | 29.8 | 1.2 | 27   | 3.5 | 500   | 1   | 94.0   |
| FishC 19 | 4877886 | 4354145 | 5000  | 2.03 | 21.203 | 12.2 | 0.0287 | 13.5 | 0.0044 | 5.8 | 0.43  | 28.4 | 1.7 | 28.7 | 3.8 | 56.5  | 292 | 49.7   |
| FishC 2  | 2557588 | 2282979 | 5000  | 0.88 | 22.414 | 12.9 | 0.0272 | 13.6 | 0.0044 | 4.3 | 0.317 | 28.5 | 1.2 | 27.2 | 3.7 | 77.7  | 316 | 63.3   |

|          |         |          |       |      |        |      |        |      |        |     |       |      |     |      |     |       |     |        |
|----------|---------|----------|-------|------|--------|------|--------|------|--------|-----|-------|------|-----|------|-----|-------|-----|--------|
| FishC 20 | 2617957 | 2336866  | 27374 | 1.39 | 20.776 | 8.1  | 0.0301 | 9.1  | 0.0045 | 4.1 | 0.453 | 29.2 | 1.2 | 30.1 | 2.7 | 104.8 | 191 | 72.1   |
| FishC 21 | 2885117 | 2575341  | 5000  | 1.06 | 22.506 | 13.8 | 0.0278 | 14.1 | 0.0045 | 3   | 0.215 | 29.2 | 0.9 | 27.9 | 3.9 | 87.7  | 339 | 66.7   |
| FishC 22 | 4409579 | 3936121  | 5000  | 2.28 | 22.51  | 12.5 | 0.0278 | 12.8 | 0.0045 | 2.8 | 0.219 | 29.2 | 0.8 | 27.8 | 3.5 | 88.2  | 306 | 66.9   |
| FishC 23 | 5355821 | 4780764  | 5000  | 2.62 | 22.474 | 11.8 | 0.0276 | 12.1 | 0.0045 | 2.7 | 0.222 | 29   | 0.8 | 27.6 | 3.3 | 84.3  | 290 | 65.6   |
| FishC 24 | 478002  | 426679   | 5000  | 1.08 | 21.224 | 19.8 | 0.0304 | 21.1 | 0.0047 | 7.4 | 0.351 | 30.1 | 2.2 | 30.4 | 6.3 | 54    | 473 | 44.3   |
| FishC 25 | 3561798 | 3179366  | 21677 | 2.28 | 20.848 | 6.1  | 0.0291 | 7.4  | 0.0044 | 4.2 | 0.566 | 28.4 | 1.2 | 29.2 | 2.1 | 96.5  | 144 | 70.6   |
| FishC 26 | 4050808 | 3615871  | 5000  | 2.02 | 23.454 | 12.2 | 0.0267 | 12.7 | 0.0045 | 3.3 | 0.26  | 29.2 | 1   | 26.7 | 3.3 | 500   | 1   | 94.2   |
| FishC 27 | 4449541 | 3971792  | 39128 | 1.51 | 21.121 | 7.5  | 0.0291 | 8.4  | 0.0045 | 3.6 | 0.436 | 28.7 | 1   | 29.1 | 2.4 | 65.7  | 179 | 56.3   |
| FishC 28 | 4847478 | 4327002  | 6E+05 | 2.54 | 20.418 | 6.5  | 0.0298 | 7.1  | 0.0044 | 3   | 0.418 | 28.4 | 0.8 | 29.8 | 2.1 | 145.7 | 152 | 80.5   |
| FishC 29 | 4388413 | 3917227  | 5000  | 1.38 | 22.342 | 11.9 | 0.0274 | 12.2 | 0.0045 | 2.8 | 0.227 | 28.6 | 0.8 | 27.5 | 3.3 | 69.8  | 290 | 59.0   |
| FishC 3  | 2092448 | 1867781  | 5000  | 1.26 | 21.384 | 13.4 | 0.0286 | 14.4 | 0.0044 | 5.2 | 0.359 | 28.6 | 1.5 | 28.7 | 4.1 | 36.1  | 322 | 20.8   |
| FishC 30 | 4283534 | 3823609  | 5000  | 1.99 | 22.358 | 12   | 0.0273 | 12.5 | 0.0044 | 3.2 | 0.257 | 28.5 | 0.9 | 27.4 | 3.4 | 71.6  | 295 | 60.2   |
| FishC 4  | 557486  | 497628   | 5000  | 1.57 | 18.202 | 21.1 | 0.033  | 22.6 | 0.0044 | 8   | 0.353 | 28   | 2.2 | 33   | 7.3 | 408.7 | 474 | 93.1   |
| FishC 5  | 2158412 | 1926662  | 5000  | 1.44 | 21.913 | 12.9 | 0.0279 | 13.4 | 0.0044 | 3.5 | 0.263 | 28.6 | 1   | 28   | 3.7 | 22.7  | 312 | -26.0  |
| FishC 6  | 3711668 | 3313145  | 5000  | 0.87 | 21.807 | 13.2 | 0.0284 | 13.5 | 0.0045 | 2.8 | 0.206 | 29   | 0.8 | 28.5 | 3.8 | 11    | 319 | -163.6 |
| FishC 7  | 1715051 | 1530905  | 5000  | 1.79 | 22.322 | 13.6 | 0.0282 | 14.2 | 0.0046 | 3.9 | 0.278 | 29.4 | 1.2 | 28.2 | 3.9 | 67.6  | 332 | 56.5   |
| FishC 8  | 1.2E+07 | 10478143 | 1E+05 | 1.05 | 20.708 | 5.4  | 0.0299 | 6.2  | 0.0045 | 3   | 0.483 | 28.9 | 0.9 | 29.9 | 1.8 | 112.4 | 128 | 74.3   |
| FishC 9  | 6015641 | 5369739  | 5000  | 1.86 | 19.356 | 13.8 | 0.0317 | 14.4 | 0.0045 | 4.3 | 0.296 | 28.6 | 1.2 | 31.7 | 4.5 | 269.5 | 316 | 89.4   |

**TABLE S2: GHR1 LA-ICPMS U-Pb ZIRCON GEOCHRONOLOGY**

| Zircon #                             | Composition |                    |             |      |                 |      |                | Ages |                |      |             |                 |      |                 | % Disc. |        |                 |       |
|--------------------------------------|-------------|--------------------|-------------|------|-----------------|------|----------------|------|----------------|------|-------------|-----------------|------|-----------------|---------|--------|-----------------|-------|
|                                      | U (238 cps) | U (norm) (238 cps) | 206Pb/204Pb | U/Th | 206Pb/207Pb (%) | 2σ   | 207Pb/235U (%) | 2σ   | 206Pb/238U (%) | 2σ   | error corr. | 206Pb/238U (Ma) | 2σ   | 207Pb/235U (Ma) |         | 2σ     | 206Pb/238U (Ma) | 2σ    |
| <b>GHR1 no CA Run 1</b>              |             |                    |             |      |                 |      |                |      |                |      |             |                 |      |                 |         |        |                 |       |
| GHR1-1                               | 7107558     | 8130364            | 2601        | 2.53 | 19.193          | 8.3  | 0.0547         | 8.9  | 0.00762        | 3.2  | 0.354       | 48.9            | 1.5  | 54.1            | 4.7     | 288.9  | 190.2           | 83.1  |
| GHR1-2                               | 5356443     | 6127257            | 154552      | 2.82 | 18.515          | 7.5  | 0.0592         | 8.2  | 0.00795        | 3.2  | 0.386       | 51.0            | 1.6  | 58.4            | 4.6     | 370.5  | 169.5           | 86.2  |
| GHR1-3                               | 4778897     | 5466600            | 2172        | 2.52 | 24.084          | 8.3  | 0.0452         | 9.4  | 0.00790        | 4.4  | 0.469       | 50.7            | 2.2  | 44.9            | 4.1     | NA     | NA              | NA    |
| GHR1-4                               | 5242910     | 5997385            | 2838        | 2.88 | 21.982          | 9.3  | 0.0470         | 10.9 | 0.00749        | 5.5  | 0.511       | 48.1            | 2.7  | 46.6            | 4.9     | NA     | NA              | NA    |
| GHR1-6                               | 8126342     | 9295756            | 4515        | 2.47 | 20.423          | 9.8  | 0.0474         | 10.1 | 0.00703        | 2.5  | 0.244       | 45.2            | 1.1  | 47.1            | 4.6     | 145.1  | 230.0           | 68.9  |
| GHR1-7                               | 4903672     | 5609331            | 31877       | 2.84 | 16.347          | 8.5  | 0.0659         | 9.3  | 0.00782        | 3.8  | 0.409       | 50.2            | 1.9  | 64.8            | 5.9     | 644.4  | 183.4           | 92.2  |
| GHR1-8                               | 3793425     | 4339314            | 2256        | 3.16 | 17.840          | 14.4 | 0.0612         | 15.3 | 0.00792        | 5.4  | 0.353       | 50.8            | 2.7  | 60.3            | 9.0     | 453.5  | 319.0           | 88.8  |
| GHR1-9                               | 4030670     | 4610699            | 25984       | 2.78 | 20.051          | 7.8  | 0.0543         | 9.7  | 0.00790        | 5.7  | 0.587       | 50.7            | 2.9  | 53.7            | 5.1     | 188.1  | 182.6           | 73.0  |
| GHR1-10                              | 8209960     | 9391407            | 9604        | 2.21 | 20.134          | 4.9  | 0.0487         | 5.6  | 0.00711        | 2.8  | 0.495       | 45.7            | 1.3  | 48.3            | 2.6     | 178.4  | 113.9           | 74.4  |
| GHR1-11                              | 7952967     | 9097431            | 7573        | 1.78 | 21.798          | 5.2  | 0.0485         | 6.4  | 0.00768        | 3.6  | 0.564       | 49.3            | 1.8  | 48.1            | 3.0     | NA     | NA              | NA    |
| GHR1-13                              | 4988081     | 5705886            | 6404        | 2.67 | 21.794          | 6.2  | 0.0482         | 7.2  | 0.00763        | 3.7  | 0.515       | 49.0            | 1.8  | 47.8            | 3.4     | NA     | NA              | NA    |
| GHR1-14                              | 4460239     | 5102085            | 3155        | 2.45 | 24.171          | 7.0  | 0.0437         | 11.2 | 0.00767        | 8.7  | 0.783       | 49.3            | 4.3  | 43.5            | 4.8     | NA     | NA              | NA    |
| GHR1-15                              | 2241234     | 2563756            | 10569       | 2.22 | 14.121          | 16.2 | 0.0798         | 17.5 | 0.00818        | 6.7  | 0.384       | 52.5            | 3.5  | 78.0            | 13.1    | 951.2  | 331.1           | 94.5  |
| <b>GHR1 no CA Run 1 (discordant)</b> |             |                    |             |      |                 |      |                |      |                |      |             |                 |      |                 |         |        |                 |       |
| GHR1-5                               | 3181823     | 3639700            | 471         | 3.14 | 9.387           | 29.2 | 0.1201         | 30.0 | 0.00818        | 3.4  | 0.226       | 52.5            | 3.6  | 115.2           | 32.7    | 1740.1 | 538.8           | 97.0  |
| GHR1-12                              | 4120579     | 4713547            | 3975        | 3.31 | 25.522          | 5.6  | 0.0495         | 55.6 | 0.00917        | 27.7 | 0.995       | 58.8            | 32.4 | 49.1            | 26.6    | NA     | NA              | NA    |
| <b>GHR1 no CA Run 2</b>              |             |                    |             |      |                 |      |                |      |                |      |             |                 |      |                 |         |        |                 |       |
| GHR1 1                               | 15377905    | 14467870           | 174251      | 1.71 | 21.055          | 2.5  | 0.0519         | 3.2  | 0.0079         | 2    | 0.61        | 50.9            | 1    | 51.4            | 1.6     | 73.1   | 60.5            | 30.4  |
| GHR1 10                              | 5016871     | 4719982            | 5000        | 3.54 | 23.07           | 11   | 0.0464         | 11   | 0.0078         | 2.1  | 0.18        | 49.8            | 1    | 46              | 5.1     | 500    | 1               | 90.0  |
| GHR1 11                              | 8432095     | 7933100            | 5000        | 2.17 | 22.739          | 5    | 0.0461         | 5.5  | 0.0076         | 2.4  | 0.43        | 48.8            | 1.2  | 45.7            | 2.5     | 500    | 1               | 90.2  |
| GHR1 12                              | 3372773     | 3173179            | 25194       | 2.94 | 14.014          | 20.1 | 0.0765         | 20   | 0.0078         | 3.6  | 0.18        | 50              | 1.8  | 74.9            | 14.7    | 966.8  | 411             | 94.8  |
| GHR1 13                              | 8939725     | 8410689            | 49893       | 2.94 | 21.036          | 3.8  | 0.0513         | 4.9  | 0.0078         | 3.1  | 0.64        | 50.3            | 1.6  | 50.8            | 2.4     | 75.2   | 89.4            | 33.1  |
| GHR1 14                              | 4862702     | 4574937            | 31514       | 3.29 | 20.768          | 5.4  | 0.0492         | 5.8  | 0.0074         | 1.9  | 0.33        | 47.6            | 0.9  | 48.8            | 2.7     | 105.6  | 128             | 54.9  |
| GHR1 15                              | 6168054     | 5803040            | 1E+06       | 2.99 | 20.648          | 6.6  | 0.0507         | 7.3  | 0.0076         | 3.1  | 0.43        | 48.7            | 1.5  | 50.2            | 3.6     | 119.3  | 156             | 59.2  |
| GHR1 16                              | 7176882     | 6752168            | 37708       | 2.63 | 20.556          | 3.6  | 0.0505         | 4.7  | 0.0075         | 3    | 0.64        | 48.4            | 1.4  | 50              | 2.3     | 129.8  | 84.9            | 62.7  |
| GHR1 17                              | 3658961     | 3442431            | 23025       | 3.41 | 21.116          | 7.6  | 0.0494         | 8.2  | 0.0076         | 3.1  | 0.38        | 48.6            | 1.5  | 48.9            | 3.9     | 66.3   | 180             | 26.7  |
| GHR1 18                              | 2206877     | 2076278            | 58098       | 4.85 | 21.432          | 9.9  | 0.0486         | 11   | 0.0076         | 4.1  | 0.39        | 48.5            | 2    | 48.1            | 5       | 30.8   | 236             | -57.5 |
| GHR1 19                              | 8340424     | 7846854            | 25986       | 2.21 | 21.417          | 6.2  | 0.0503         | 7.9  | 0.0078         | 5    | 0.63        | 50.2            | 2.5  | 49.8            | 3.9     | 32.5   | 148             | -54.5 |
| GHR1 2                               | 4628957     | 4355024            | 73238       | 3.64 | 21.251          | 6.4  | 0.0481         | 7.5  | 0.0074         | 4    | 0.53        | 47.7            | 1.9  | 47.7            | 3.5     | 51     | 152             | 6.5   |
| GHR1 20                              | 5017652     | 4720717            | 219893      | 3.4  | 21.29           | 5.5  | 0.0481         | 6.1  | 0.0074         | 2.7  | 0.44        | 47.8            | 1.3  | 47.7            | 2.9     | 46.6   | 131             | -2.6  |
| GHR1 21                              | 2023330     | 1903593            | 5000        | 6.78 | 22.379          | 13   | 0.0464         | 13   | 0.0075         | 3.3  | 0.24        | 48.4            | 1.6  | 46              | 6       | 73.9   | 319             | 34.5  |
| GHR1 22                              | 2879617     | 2709207            | 5000        | 3.01 | 21.936          | 12.3 | 0.0463         | 13   | 0.0074         | 3.7  | 0.29        | 47.3            | 1.7  | 45.9            | 5.8     | 25.2   | 297             | -87.7 |
| GHR1 23                              | 2322411     | 2184975            | 5000        | 3.66 | 23.543          | 13.2 | 0.0461         | 14   | 0.0079         | 3.2  | 0.24        | 50.5            | 1.6  | 45.7            | 6.1     | 500    | 1               | 89.9  |
| GHR1 24                              | 10133150    | 9533490            | 24084       | 2.01 | 21.183          | 4.2  | 0.0536         | 5.1  | 0.0082         | 2.9  | 0.57        | 52.9            | 1.5  | 53              | 2.6     | 58.7   | 99.7            | 9.9   |
| GHR1 25                              | 3715686     | 3495799            | 5000        | 3.45 | 22.459          | 11.3 | 0.0468         | 12   | 0.0076         | 2.8  | 0.24        | 48.9            | 1.4  | 46.4            | 5.3     | 82.6   | 277             | 40.8  |
| GHR1 26                              | 16579331    | 15598198           | 5000        | 1.95 | 11.486          | 8    | 0.1009         | 8.5  | 0.0084         | 2.8  | 0.34        | 54              | 1.5  | 97.6            | 7.9     | 1361   | 154             | 96.0  |
| GHR1 27                              | 3534593     | 3325423            | 31821       | 3.2  | 20.593          | 5.7  | 0.0509         | 6.6  | 0.0076         | 3.2  | 0.49        | 48.9            | 1.6  | 50.4            | 3.2     | 125.6  | 134             | 61.1  |
| GHR1 28                              | 5886671     | 5538309            | 5000        | 2.64 | 22.533          | 11.1 | 0.0477         | 11   | 0.0078         | 2.7  | 0.24        | 50.1            | 1.4  | 47.3            | 5.3     | 90.7   | 271             | 44.8  |

|         |          |          |       |      |        |      |        |     |        |     |      |      |     |      |      |       |      |        |
|---------|----------|----------|-------|------|--------|------|--------|-----|--------|-----|------|------|-----|------|------|-------|------|--------|
| GHR1 29 | 21087095 | 19839201 | 75664 | 0.91 | 21.243 | 3.2  | 0.0542 | 4.1 | 0.0084 | 2.5 | 0.62 | 53.6 | 1.3 | 53.6 | 2.1  | 52    | 76.1 | -3.1   |
| GHR1 3  | 7975424  | 7503454  | 97174 | 1.88 | 20.843 | 3.6  | 0.0513 | 3.8 | 0.0078 | 1.4 | 0.37 | 49.9 | 0.7 | 50.8 | 1.9  | 97    | 84.3 | 48.6   |
| GHR1 30 | 3835378  | 3608408  | 84945 | 3.45 | 17.456 | 6.3  | 0.0603 | 7   | 0.0076 | 3   | 0.43 | 49   | 1.5 | 59.4 | 4    | 501.6 | 139  | 90.2   |
| GHR1 4  | 4167938  | 3921287  | 5000  | 2.18 | 11.876 | 21.2 | 0.0886 | 21  | 0.0076 | 2.8 | 0.13 | 49   | 1.4 | 86.2 | 17.7 | 1296  | 414  | 96.2   |
| GHR1 5  | 9609677  | 9040995  | 5000  | 3.4  | 22.774 | 10.7 | 0.0474 | 11  | 0.0078 | 2.8 | 0.25 | 50.3 | 1.4 | 47   | 5.1  | 116.8 | 264  | 56.9   |
| GHR1 6  | 5159540  | 4854208  | 5000  | 2.54 | 21.912 | 11.3 | 0.0472 | 12  | 0.0075 | 2.7 | 0.24 | 48.2 | 1.3 | 46.8 | 5.3  | 22.5  | 274  | -114.2 |
| GHR1 7  | 6506930  | 6121862  | 31439 | 2.73 | 17.767 | 7    | 0.0559 | 7.7 | 0.0072 | 3.3 | 0.43 | 46.3 | 1.5 | 55.2 | 4.1  | 462.6 | 155  | 90.0   |
| GHR1 8  | 6375965  | 5998648  | 46147 | 3.08 | 21.433 | 5.4  | 0.0485 | 6.5 | 0.0075 | 3.6 | 0.55 | 48.4 | 1.7 | 48   | 3.1  | 30.6  | 130  | -58.2  |
| GHR1 9  | 2587160  | 2434057  | 21737 | 3.07 | 20.198 | 8    | 0.0509 | 8.6 | 0.0075 | 3.3 | 0.38 | 47.9 | 1.6 | 50.4 | 4.2  | 171   | 186  | 72.0   |

**Composition**

**Ages**

| Zircon #             | U (238 cps) | U (norm) (238 cps) | 206Pb/204Pb | U/Th | 206Pb/207Pb (%) | 2σ   | 207Pb/235U (%) | 2σ   | 206Pb/238U (%) | 2σ  | error | 206Pb/2σ | 207Pb/2σ | 206Pb/2σ | 2σ   | %     | Disc. |        |
|----------------------|-------------|--------------------|-------------|------|-----------------|------|----------------|------|----------------|-----|-------|----------|----------|----------|------|-------|-------|--------|
| <b>GHR1 CA Run 1</b> |             |                    |             |      |                 |      |                |      |                |     |       |          |          |          |      |       |       |        |
| GHR1-1               | 2952057     | 3887206            | 4834        | 2.82 | 22.737          | 4.2  | 0.0464         | 5.9  | 0.00766        | 4.2 | 0.709 | 49.2     | 2.0      | 46.1     | 2.7  | NA    | NA    | NA     |
| GHR1-2               | 3480850     | 4583509            | 4591        | 4.32 | 21.476          | 5.6  | 0.0474         | 7.1  | 0.00739        | 4.3 | 0.606 | 47.4     | 2.0      | 47.0     | 3.3  | 25.9  | NA    | -83.2  |
| GHR1-3               | 3934300     | 5180603            | 55149       | 2.63 | 20.730          | 5.2  | 0.0546         | 7.3  | 0.00822        | 5.1 | 0.703 | 52.8     | 2.7      | 54.0     | 3.8  | 110.0 | 122.2 | 52.0   |
| GHR1-4               | 3091576     | 4070922            | 2104        | 2.78 | 23.893          | 5.9  | 0.0442         | 7.2  | 0.00766        | 4.2 | 0.576 | 49.2     | 2.0      | 43.9     | 3.1  | NA    | NA    | NA     |
| GHR1-5               | 4070890     | 5360462            | 2492        | 2.54 | 22.116          | 6.8  | 0.0463         | 8.5  | 0.00743        | 5.1 | 0.602 | 47.7     | 2.4      | 46.0     | 3.8  | NA    | NA    | NA     |
| GHR1-6               | 3144248     | 4140279            | 1763        | 2.70 | 21.889          | 13.4 | 0.0493         | 14.2 | 0.00782        | 4.7 | 0.331 | 50.2     | 2.3      | 48.8     | 6.8  | NA    | NA    | NA     |
| GHR1-7               | 5505455     | 7249467            | 98121       | 2.41 | 20.191          | 3.4  | 0.0520         | 5.3  | 0.00762        | 4.1 | 0.776 | 48.9     | 2.0      | 51.5     | 2.7  | 171.9 | 78.5  | 71.5   |
| GHR1-8               | 4069170     | 5358197            | 2204        | 2.44 | 22.926          | 12.2 | 0.0430         | 12.6 | 0.00715        | 3.3 | 0.261 | 45.9     | 1.5      | 42.7     | 5.3  | NA    | NA    | NA     |
| GHR1-9               | 3769800     | 4963993            | 1581        | 3.28 | 23.145          | 5.6  | 0.0445         | 6.3  | 0.00747        | 3.1 | 0.484 | 48.0     | 1.5      | 44.2     | 2.7  | NA    | NA    | NA     |
| GHR1-10              | 3843329     | 5060815            | 4855        | 2.65 | 16.112          | 8.1  | 0.0671         | 8.6  | 0.00784        | 2.9 | 0.338 | 50.4     | 1.5      | 65.9     | 5.5  | 675.5 | 174.0 | 92.5   |
| GHR1-11              | 1757714     | 2314521            | 1346        | 1.65 | 26.966          | 31.1 | 0.0396         | 31.5 | 0.00776        | 5.4 | 0.170 | 49.8     | 2.7      | 39.5     | 12.2 | NA    | NA    | NA     |
| GHR1-12              | 4397016     | 5789897            | 3212        | 3.21 | 20.659          | 7.6  | 0.0528         | 8.2  | 0.00791        | 2.9 | 0.360 | 50.8     | 1.5      | 52.2     | 4.2  | 118.1 | 179.6 | 57.0   |
| GHR1-13              | 3733043     | 4915593            | 3833        | 2.32 | 18.402          | 10.1 | 0.0598         | 11.8 | 0.00798        | 6.1 | 0.517 | 51.2     | 3.1      | 58.9     | 6.8  | 384.3 | 227.7 | 86.7   |
| GHR1-14              | 2676128     | 3523869            | 17286       | 2.61 | 19.472          | 9.1  | 0.0555         | 11.1 | 0.00784        | 6.3 | 0.567 | 50.3     | 3.1      | 54.8     | 5.9  | 255.8 | 209.4 | 80.3   |
| GHR1-15              | 3306750     | 4354259            | 2696        | 2.33 | 21.033          | 9.4  | 0.0500         | 9.9  | 0.00763        | 3.2 | 0.320 | 49.0     | 1.6      | 49.5     | 4.8  | 75.6  | NA    | 35.2   |
| <b>GHR1 CA Run 2</b> |             |                    |             |      |                 |      |                |      |                |     |       |          |          |          |      |       |       |        |
| GHR1 1               | 4382655     | 3912088            | 5000        | 2.46 | 22.668          | 11.8 | 0.0454         | 12   | 0.0075         | 2.9 | 0.24  | 48       | 1.4      | 45.1     | 5.3  | 105.3 | 290   | 54.4   |
| GHR1 10              | 5185941     | 4629124            | 5000        | 3.17 | 22.575          | 11.2 | 0.046          | 12   | 0.0075         | 3.5 | 0.29  | 48.3     | 1.7      | 45.6     | 5.2  | 95.2  | 276   | 49.3   |
| GHR1 11              | 4565560     | 4075354            | 5000        | 2.73 | 22.931          | 11.7 | 0.0459         | 12   | 0.0076         | 2.2 | 0.18  | 49       | 1.1      | 45.6     | 5.3  | 133.8 | 289   | 63.4   |
| GHR1 12              | 4500834     | 4017578            | 523758      | 3.16 | 20.991          | 4.6  | 0.0508         | 5.2  | 0.0077         | 2.4 | 0.47  | 49.7     | 1.2      | 50.3     | 2.6  | 80.4  | 110   | 38.2   |
| GHR1 13              | 5817738     | 5193085            | 38932       | 2.15 | 21.39           | 4.6  | 0.0492         | 5.1  | 0.0076         | 2.3 | 0.45  | 49       | 1.1      | 48.7     | 2.4  | 35.5  | 110   | -38.0  |
| GHR1 14              | 4985752     | 4450430            | 27089       | 2.95 | 20.863          | 4.8  | 0.0509         | 5.6  | 0.0077         | 2.8 | 0.51  | 49.5     | 1.4      | 50.4     | 2.7  | 94.8  | 114   | 47.8   |
| GHR1 15              | 6850286     | 6114768            | 80460       | 2.65 | 20.963          | 5.5  | 0.0504         | 5.8  | 0.0077         | 1.9 | 0.32  | 49.2     | 0.9      | 49.9     | 2.8  | 83.5  | 130   | 41.1   |
| GHR1 16              | 5718989     | 5104939            | 20875       | 2.82 | 21.45           | 6.7  | 0.0487         | 7.1  | 0.0076         | 2.3 | 0.33  | 48.7     | 1.1      | 48.3     | 3.3  | 28.7  | 160   | -69.7  |
| GHR1 17              | 18069712    | 16129560           | 274997      | 1.61 | 21.284          | 2.8  | 0.0502         | 3.3  | 0.0078         | 1.8 | 0.54  | 49.8     | 0.9      | 49.7     | 1.6  | 47.4  | 67.1  | -5.1   |
| GHR1 18              | 6640764     | 5927742            | 260441      | 3.14 | 21.177          | 4.2  | 0.0499         | 4.8  | 0.0077         | 2.3 | 0.48  | 49.3     | 1.1      | 49.5     | 2.3  | 59.3  | 101   | 16.9   |
| GHR1 19              | 5977412     | 5335615            | 40850       | 2.45 | 20.997          | 3.8  | 0.0504         | 4.9  | 0.0077         | 3.2 | 0.65  | 49.3     | 1.6      | 49.9     | 2.4  | 79.6  | 89.4  | 38.1   |
| GHR1 2               | 6232278     | 5563116            | 32160       | 2.34 | 21.595          | 4.4  | 0.0483         | 5.1  | 0.0076         | 2.7 | 0.52  | 48.6     | 1.3      | 47.9     | 2.4  | 12.6  | 106   | -285.7 |
| GHR1 20              | 8275400     | 7386867            | 5000        | 2.18 | 23.019          | 10.7 | 0.0451         | 11   | 0.0075         | 2.9 | 0.26  | 48.3     | 1.4      | 44.8     | 4.8  | 500   | 1     | 90.3   |
| GHR1 21              | 5823807     | 5198502            | 5000        | 2.86 | 22.223          | 11.5 | 0.0461         | 12   | 0.0074         | 2.1 | 0.18  | 47.7     | 1        | 45.8     | 5.2  | 56.8  | 280   | 16.0   |

|         |          |          |        |      |        |      |        |     |        |     |      |      |     |      |     |       |      |        |
|---------|----------|----------|--------|------|--------|------|--------|-----|--------|-----|------|------|-----|------|-----|-------|------|--------|
| GHR1 22 | 8806835  | 7861241  | 5000   | 2.31 | 21.884 | 10.9 | 0.0472 | 11  | 0.0075 | 2.9 | 0.26 | 48.1 | 1.4 | 46.8 | 5.2 | 19.5  | 265  | -146.7 |
| GHR1 23 | 11111557 | 992209   | 5000   | 2.12 | 19.428 | 14.5 | 0.0554 | 15  | 0.0078 | 4.4 | 0.29 | 50.1 | 2.2 | 54.7 | 8   | 261   | 332  | 80.8   |
| GHR1 24 | 12415455 | 11082402 | 29517  | 2.13 | 21.086 | 3.5  | 0.0483 | 4.4 | 0.0074 | 2.7 | 0.61 | 47.5 | 1.3 | 47.9 | 2   | 69.5  | 82.6 | 31.7   |
| GHR1 25 | 5312278  | 4741897  | 40469  | 2.34 | 20.627 | 5.9  | 0.0501 | 6.5 | 0.0075 | 2.7 | 0.42 | 48.1 | 1.3 | 49.6 | 3.2 | 121.7 | 140  | 60.5   |
| GHR1 26 | 4318930  | 3855205  | 327566 | 2.88 | 21.51  | 5.2  | 0.0492 | 6   | 0.0077 | 3.1 | 0.51 | 49.3 | 1.5 | 48.8 | 2.9 | 22    | 125  | -124.1 |
| GHR1 27 | 5261336  | 4696424  | 5000   | 2.76 | 23.126 | 11.1 | 0.0454 | 11  | 0.0076 | 2.5 | 0.22 | 49   | 1.2 | 45.1 | 5   | 500   | 1    | 90.2   |
| GHR1 28 | 2225556  | 1986597  | 5000   | 1.72 | 19.92  | 13.9 | 0.0551 | 15  | 0.008  | 4.6 | 0.32 | 51.2 | 2.4 | 54.5 | 7.8 | 203.2 | 322  | 74.8   |
| GHR1 29 | 4772625  | 4260186  | 404631 | 2.39 | 20.1   | 7.1  | 0.0529 | 7.5 | 0.0077 | 2.4 | 0.33 | 49.5 | 1.2 | 52.3 | 3.8 | 182.3 | 165  | 72.8   |
| GHR1 3  | 5547523  | 4951883  | 5000   | 2.55 | 22.146 | 10.8 | 0.0469 | 11  | 0.0075 | 2.8 | 0.26 | 48.4 | 1.4 | 46.5 | 5.1 | 48.4  | 263  | 0.0    |
| GHR1 30 | 5044687  | 4503037  | 23517  | 2.29 | 21.379 | 4.9  | 0.0488 | 5.8 | 0.0076 | 3.2 | 0.55 | 48.7 | 1.6 | 48.4 | 2.8 | 36.7  | 117  | -32.7  |
| GHR1 4  | 6185802  | 5521630  | 53220  | 1.75 | 21.223 | 5.6  | 0.052  | 6.5 | 0.008  | 3.2 | 0.5  | 51.4 | 1.6 | 51.5 | 3.2 | 54.2  | 134  | 5.2    |
| GHR1 5  | 5116838  | 4567441  | 67196  | 2.51 | 21.311 | 5.1  | 0.0482 | 5.5 | 0.0075 | 2.1 | 0.38 | 47.8 | 1   | 47.8 | 2.6 | 44.3  | 122  | -7.9   |
| GHR1 6  | 6182763  | 5518917  | 5000   | 2.52 | 22.269 | 10.8 | 0.0473 | 11  | 0.0076 | 2.8 | 0.25 | 49.1 | 1.3 | 46.9 | 5.1 | 61.8  | 264  | 20.6   |
| GHR1 7  | 5928535  | 5291986  | 34448  | 2.66 | 21.465 | 4.6  | 0.0486 | 5.3 | 0.0076 | 2.6 | 0.49 | 48.6 | 1.3 | 48.2 | 2.5 | 27    | 111  | -80.0  |
| GHR1 8  | 5579401  | 4980338  | 35238  | 2.56 | 20.624 | 4.1  | 0.0512 | 5.8 | 0.0077 | 4.1 | 0.71 | 49.2 | 2   | 50.7 | 2.9 | 122.1 | 97.2 | 59.7   |
| GHR1 9  | 5761414  | 5142809  | 190837 | 2.81 | 21.797 | 4.5  | 0.0485 | 5.2 | 0.0077 | 2.5 | 0.48 | 49.2 | 1.2 | 48   | 2.4 | 9.9   | 110  | -397.0 |

**TABLE S3: 49127 LA-ICPMS U-Pb ZIRCON GEOCHRONOLOGY RESULTS**

| Zircon #                              | Composition |                    |             |      |             |        |            |        |            |        | Ages        |                 |         |                 |         |                  |         | % Disc. |
|---------------------------------------|-------------|--------------------|-------------|------|-------------|--------|------------|--------|------------|--------|-------------|-----------------|---------|-----------------|---------|------------------|---------|---------|
|                                       | U (238 cps) | U (norm) (238 cps) | 206Pb/204Pb | U/Th | 206Pb/207Pb | 2σ (%) | 207Pb/235U | 2σ (%) | 206Pb/238U | 2σ (%) | Error Corr. | 206Pb/238U (Ma) | 2σ (Ma) | 207Pb/235U (Ma) | 2σ (Ma) | 206Pb/207Pb (Ma) | 2σ (Ma) |         |
| <b>49127 no CA Run 1</b>              |             |                    |             |      |             |        |            |        |            |        |             |                 |         |                 |         |                  |         |         |
| 49127-1                               | 3644095     | 4168495            | 10652       | 1.76 | 20.241      | 3.5    | 0.1476     | 4.8    | 0.02168    | 3.3    | 0.683       | 138.3           | 4.5     | 139.8           | 6.3     | 166.1            | 82.1    | 16.8    |
| 49127-2                               | 1114200     | 1274538            | 1229        | 1.15 | 20.503      | 11.0   | 0.1435     | 13.2   | 0.02135    | 7.4    | 0.558       | 136.2           | 10.0    | 136.2           | 16.9    | 135.9            | 258.4   | -0.2    |
| 49127-3                               | 805140.4    | 921003             | 11375       | 1.88 | 25.496      | 6.2    | 0.1566     | 7.9    | 0.02897    | 4.9    | 0.618       | 184.1           | 8.9     | 147.7           | 10.9    | NA               | NA      | NA      |
| 49127-5                               | 721882.9    | 825765             | 12448       | 2.04 | 17.172      | 12.8   | 0.1901     | 16.2   | 0.02369    | 9.9    | 0.613       | 150.9           | 14.8    | 176.7           | 26.2    | 537.7            | 279.8   | 71.9    |
| 49127-6                               | 2688012     | 3074828            | 4976        | 1.19 | 21.159      | 7.7    | 0.1437     | 8.8    | 0.02206    | 4.4    | 0.496       | 140.7           | 6.1     | 136.3           | 11.3    | 61.3             | NA      | -129.3  |
| 49127-7                               | 1395055     | 1595809            | 4559        | 1.04 | 20.863      | 7.5    | 0.1519     | 10.4   | 0.02300    | 7.2    | 0.689       | 146.6           | 10.4    | 143.6           | 13.9    | 94.9             | 178.0   | -54.5   |
| 49127-8                               | 13351009    | 15272273           | 23463       | 1.16 | 21.092      | 1.9    | 0.1416     | 3.1    | 0.02167    | 2.5    | 0.801       | 138.2           | 3.4     | 134.4           | 3.9     | 68.9             | 44.5    | -100.4  |
| 49127-10                              | 8728971     | 9985105            | 20920       | 1.85 | 20.769      | 2.5    | 0.1439     | 3.9    | 0.02169    | 2.9    | 0.765       | 138.3           | 4.0     | 136.6           | 4.9     | 105.5            | 58.7    | -31.1   |
| 49127-11                              | 2443184     | 2794768            | 12689       | 1.15 | 20.942      | 5.2    | 0.1514     | 9.5    | 0.02300    | 8.0    | 0.842       | 146.6           | 11.6    | 143.1           | 12.7    | 86.0             | 122.3   | -70.5   |
| 49127-12                              | 1140857     | 1305031            | 2787        | 1.12 | 20.408      | 14.0   | 0.1581     | 14.9   | 0.02341    | 4.9    | 0.331       | 149.2           | 7.3     | 149.0           | 20.6    | 146.8            | NA      | -1.6    |
| 49127-13                              | 1052093     | 1203493            | 2484        | 1.44 | 23.866      | 7.2    | 0.1315     | 10.6   | 0.02278    | 7.9    | 0.739       | 145.2           | 11.3    | 125.5           | 12.5    | NA               | NA      | NA      |
| 49127-15                              | 1852182     | 2118718            | 8166        | 1.10 | 18.705      | 5.7    | 0.1640     | 7.6    | 0.02225    | 5.2    | 0.673       | 141.9           | 7.2     | 154.2           | 10.9    | 347.4            | 127.9   | 59.2    |
| <b>49127 no CA run 1 (discordant)</b> |             |                    |             |      |             |        |            |        |            |        |             |                 |         |                 |         |                  |         |         |
| 49127-4                               | 1090336     | 1247240            | 4643        | 0.99 | 23.411      | 6.1    | 0.1447     | 20.5   | 0.02459    | 19.5   | 0.955       | 156.6           | 30.2    | 137.3           | 26.3    | NA               | NA      | NA      |
| 49127-9                               | 7809481     | 8933297            | 8761        | 1.91 | 21.388      | 3.8    | 0.1400     | 13.7   | 0.02172    | 13.2   | 0.961       | 138.5           | 18.0    | 133.0           | 17.1    | 35.7             | NA      | -288.0  |
| 49127-14                              | 1218558     | 1393914            | 3722        | 1.54 | 34.109      | 14.8   | 0.1802     | 61.8   | 0.04460    | 60.0   | 0.971       | 281.3           | 165.1   | 168.2           | 95.9    | NA               | NA      | NA      |
| <b>49127 no CA Run 2</b>              |             |                    |             |      |             |        |            |        |            |        |             |                 |         |                 |         |                  |         |         |
| 49127 1                               | 1712085     | 1610767            | 5000        | 1.18 | 21.802      | 10.7   | 0.1322     | 11.2   | 0.02091    | 3.2    | 0.286       | 133.4           | 4.2     | 126.1           | 13.3    | 10.4             | 259.1   | -1182.7 |
| 49127 10                              | 2556589     | 2405295            | 5000        | 1.86 | 21.63       | 10.6   | 0.1355     | 10.8   | 0.02126    | 1.9    | 0.176       | 135.6           | 2.5     | 129             | 13.1    | 8.6              | 255.3   | -1476.7 |
| 49127 11                              | 1996308     | 1878170            | 46403       | 1.66 | 20.523      | 5      | 0.143      | 6      | 0.0213     | 3.3    | 0.55        | 135.9           | 4.4     | 135.8           | 7.6     | 133.7            | 117.9   | -1.6    |
| 49127 12                              | 594747      | 559551             | 5000        | 1.88 | 22.207      | 14.3   | 0.1337     | 15     | 0.02154    | 4.6    | 0.305       | 137.4           | 6.2     | 127.4           | 18      | 55               | 349     | -149.8  |
| 49127 13                              | 1180192     | 1110351            | 5000        | 2.06 | 21.713      | 10.4   | 0.1344     | 11     | 0.02118    | 3.5    | 0.317       | 135.1           | 4.6     | 128.1           | 13.2    | 0.5              | 251     | #####   |
| 49127 14                              | 1549589     | 1457887            | 24537       | 1.71 | 19.72       | 5.4    | 0.147      | 6.4    | 0.02104    | 3.5    | 0.538       | 134.2           | 4.6     | 139.3           | 8.4     | 226.6            | 125.2   | 40.8    |
| 49127 15                              | 1758776     | 1654695            | 69357       | 1.55 | 20.372      | 4.8    | 0.1444     | 5.4    | 0.02135    | 2.6    | 0.471       | 136.2           | 3.4     | 137             | 6.9     | 150.9            | 112     | 9.7     |
| 49127 16                              | 1652525     | 1554732            | 163670      | 1.33 | 20.226      | 5      | 0.143      | 5.9    | 0.02099    | 3.2    | 0.541       | 133.9           | 4.3     | 135.7           | 7.5     | 167.7            | 116.8   | 20.2    |
| 49127 17                              | 975979      | 918222             | 82457       | 1.67 | 19.951      | 6.4    | 0.1462     | 6.9    | 0.02116    | 2.7    | 0.386       | 135             | 3.6     | 138.6           | 9       | 199.7            | 148.5   | 32.4    |
| 49127 18                              | 865814      | 814577             | 5000        | 1.82 | 21.006      | 11.1   | 0.137      | 11.8   | 0.02088    | 4.1    | 0.343       | 133.2           | 5.4     | 130.3           | 14.5    | 78.6             | 264.2   | -69.5   |
| 49127 19                              | 1151344     | 1083210            | 5000        | 1.87 | 21.505      | 11.2   | 0.136      | 11.6   | 0.02122    | 3.1    | 0.269       | 135.4           | 4.2     | 129.5           | 14.1    | 22.6             | 268.1   | -499.1  |
| 49127 2                               | 12407845    | 11673573           | 365080      | 2.01 | 20.754      | 2.3    | 0.1477     | 3.1    | 0.02224    | 2      | 0.651       | 141.8           | 2.8     | 139.9           | 4       | 107.3            | 55.4    | -32.2   |
| 49127 20                              | 1098812     | 1033786            | 119437      | 1.55 | 20.129      | 5.9    | 0.144      | 7      | 0.02103    | 3.7    | 0.527       | 134.1           | 4.9     | 136.6           | 8.9     | 179              | 137.9   | 25.1    |
| 49127 21                              | 1258029     | 1183581            | 238006      | 1.16 | 20.379      | 5.5    | 0.1424     | 6.3    | 0.02106    | 2.9    | 0.47        | 134.4           | 3.9     | 135.2           | 7.9     | 150.1            | 129.5   | 10.5    |
| 49127 22                              | 2241735     | 2109073            | 5000        | 1.36 | 22.166      | 10.5   | 0.1305     | 10.9   | 0.02099    | 2.8    | 0.254       | 133.9           | 3.7     | 124.6           | 12.8    | 50.6             | 256.2   | -164.6  |
| 49127 23                              | 1518147     | 1428306            | 5000        | 1.34 | 21.097      | 11.5   | 0.1365     | 12.1   | 0.02089    | 3.7    | 0.307       | 133.3           | 4.9     | 129.9           | 14.7    | 68.3             | 274     | -95.2   |
| 49127 24                              | 2212860     | 2081907            | 41627       | 1.66 | 20.506      | 4      | 0.1409     | 4.7    | 0.02096    | 2.6    | 0.54        | 133.7           | 3.4     | 133.8           | 5.9     | 135.5            | 93.7    | 1.3     |
| 49127 25                              | 10130969    | 9531438            | 4509535     | 2.15 | 20.547      | 2.1    | 0.1461     | 3      | 0.02178    | 2.2    | 0.724       | 138.9           | 3       | 138.4           | 3.9     | 130.9            | 49.4    | -6.1    |
| 49127 26                              | 1847112     | 1737803            | 58523       | 1.27 | 20.406      | 5.3    | 0.1403     | 6.3    | 0.02077    | 3.4    | 0.533       | 132.5           | 4.4     | 133.3           | 7.9     | 147.1            | 125     | 9.9     |
| 49127 27                              | 4940122     | 4647775            | 33138       | 1.44 | 21.113      | 3      | 0.1405     | 4      | 0.02153    | 2.6    | 0.651       | 137.3           | 3.5     | 133.5           | 5       | 66.6             | 71.9    | -106.2  |
| 49127 28                              | 969050      | 911703             | 5000        | 1.59 | 20.537      | 10.8   | 0.1435     | 11.8   | 0.02139    | 4.6    | 0.39        | 136.4           | 6.2     | 136.2           | 15      | 131.9            | 254.8   | -3.4    |

|          |          |          |        |      |        |      |        |      |         |     |       |       |     |       |      |       |       |        |
|----------|----------|----------|--------|------|--------|------|--------|------|---------|-----|-------|-------|-----|-------|------|-------|-------|--------|
| 49127 29 | 15506812 | 14589149 | 146336 | 1.84 | 20.686 | 2.4  | 0.15   | 3.3  | 0.02251 | 2.3 | 0.706 | 143.5 | 3.3 | 141.9 | 4.4  | 115   | 55.5  | -24.8  |
| 49127 3  | 2144141  | 2017255  | 5000   | 1.25 | 22.108 | 10.2 | 0.1321 | 10.8 | 0.0212  | 3.7 | 0.341 | 135.2 | 4.9 | 126   | 12.8 | 44.1  | 247.7 | -206.6 |
| 49127 30 | 10869681 | 10226434 | 112969 | 2.17 | 20.233 | 2.4  | 0.1482 | 3.4  | 0.02176 | 2.4 | 0.709 | 138.8 | 3.3 | 140.3 | 4.4  | 166.9 | 55.4  | 16.8   |
| 49127 4  | 2649818  | 2493007  | 379859 | 1.21 | 19.903 | 6.2  | 0.1452 | 7    | 0.02097 | 3.2 | 0.464 | 133.8 | 4.3 | 137.6 | 9    | 205.2 | 143.8 | 34.8   |
| 49127 5  | 3634532  | 3419447  | 106614 | 1.94 | 20.701 | 3.1  | 0.1428 | 4.1  | 0.02145 | 2.7 | 0.661 | 136.8 | 3.7 | 135.5 | 5.3  | 113.3 | 73.4  | -20.7  |
| 49127 6  | 12922243 | 12157529 | 365913 | 1.36 | 20.456 | 2.2  | 0.1502 | 2.8  | 0.0223  | 1.7 | 0.614 | 142.2 | 2.5 | 142.1 | 3.8  | 141.2 | 52.7  | -0.7   |
| 49127 7  | 17388120 | 16359124 | 122205 | 2.01 | 20.48  | 2    | 0.1514 | 2.8  | 0.0225  | 2.1 | 0.724 | 143.4 | 2.9 | 143.2 | 3.8  | 138.5 | 46.1  | -3.5   |
| 49127 8  | 1643485  | 1546227  | 29310  | 1.24 | 20.498 | 5.9  | 0.1416 | 6.7  | 0.02106 | 3.2 | 0.477 | 134.3 | 4.2 | 134.5 | 8.4  | 136.5 | 137.7 | 1.6    |
| 49127 9  | 1344600  | 1265029  | 5000   | 1.19 | 22.031 | 11.1 | 0.1302 | 11.7 | 0.02081 | 3.8 | 0.321 | 132.8 | 5   | 124.2 | 13.7 | 35.7  | 270.1 | -272.0 |

**Composition**

**Ages**

| Zircon #                           | U (238 cps) | U (norm) (238 cps) | 206Pb/204Pb | U/Th | 206Pb/207Pb | 2σ (%) | 207Pb/235U (%) | 2σ (%) | 206Pb/238U (%) | 2σ (%) | Error Corr. | 206Pb/238U (Ma) | 2σ (Ma) | 207Pb/235U (Ma) | 2σ (Ma) | 206Pb/207Pb (Ma) | 2σ (Ma) | % Disc. |
|------------------------------------|-------------|--------------------|-------------|------|-------------|--------|----------------|--------|----------------|--------|-------------|-----------------|---------|-----------------|---------|------------------|---------|---------|
| <b>49127 CA Run 1</b>              |             |                    |             |      |             |        |                |        |                |        |             |                 |         |                 |         |                  |         |         |
| 49127-2                            | 758558.3    | 998854             | 830         | 1.31 | 24.046      | 18.1   | 0.119          | 18.4   | 0.02071        | 3.2    | 0.176       | 132.1           | 4.2     | 113.9           | 19.8    | NA               | NA      | NA      |
| 49127-4                            | 1043707     | 1374331            | 2073        | 1.66 | 23.756      | 5.8    | 0.129          | 7.2    | 0.02222        | 4.2    | 0.589       | 141.7           | 5.9     | 123.1           | 8.3     | NA               | NA      | NA      |
| 49127-5                            | 676796.1    | 891191             | 1202        | 1.48 | 15.038      | 17.5   | 0.187          | 18.6   | 0.02046        | 6.4    | 0.345       | 130.5           | 8.3     | 174.5           | 29.9    | 821.2            | 366.0   | 84.1    |
| 49127-6                            | 16034772    | 21114249           | 64816       | 5.64 | 20.330      | 2.3    | 0.149          | 3.7    | 0.02204        | 2.9    | 0.780       | 140.5           | 4.0     | 141.4           | 4.9     | 155.8            | 54.6    | 9.8     |
| 49127-7                            | 1104401     | 1454252            | 1324        | 1.11 | 25.646      | 13.1   | 0.119          | 14.2   | 0.02216        | 5.4    | 0.378       | 141.3           | 7.5     | 114.2           | 15.3    | NA               | NA      | NA      |
| 49127-8                            | 994894.2    | 1310056            | 830         | 1.50 | 25.599      | 47.7   | 0.112          | 48.1   | 0.02074        | 5.6    | 0.116       | 132.4           | 7.3     | 107.5           | 49.0    | NA               | NA      | NA      |
| 49127-9                            | 1185920     | 1561594            | 8406        | 1.05 | 19.601      | 6.8    | 0.156          | 7.9    | 0.02212        | 4.0    | 0.508       | 141.0           | 5.6     | 146.8           | 10.8    | 240.6            | 156.4   | 41.4    |
| 49127-10                           | 2415065     | 3180106            | 8867        | 2.06 | 17.816      | 7.9    | 0.171          | 8.7    | 0.02206        | 3.7    | 0.424       | 140.7           | 5.1     | 160.0           | 12.9    | 456.5            | 175.1   | 69.2    |
| 49127-11                           | 1825963     | 2404389            | 8870        | 1.21 | 20.277      | 5.2    | 0.147          | 6.9    | 0.02170        | 4.5    | 0.656       | 138.4           | 6.2     | 139.7           | 9.0     | 161.9            | 122.1   | 14.5    |
| 49127-12                           | 1240185     | 1633049            | 2237        | 1.53 | 18.206      | 9.8    | 0.168          | 10.9   | 0.02220        | 4.7    | 0.431       | 141.5           | 6.6     | 157.7           | 15.9    | 408.2            | 219.2   | 65.3    |
| 49127-13                           | 1986221     | 2615413            | 19088       | 1.81 | 20.773      | 4.5    | 0.146          | 5.6    | 0.02202        | 3.3    | 0.597       | 140.4           | 4.6     | 138.5           | 7.2     | 105.1            | 105.4   | -33.6   |
| 49127-14                           | 540655.6    | 711924             | 20817       | 2.10 | 16.680      | 12.2   | 0.176          | 15.2   | 0.02136        | 9.1    | 0.598       | 136.3           | 12.3    | 165.0           | 23.2    | 600.9            | 264.4   | 77.3    |
| 49127-15                           | 854975.6    | 1125814            | 2589        | 2.36 | 19.481      | 9.7    | 0.147          | 11.4   | 0.02074        | 5.8    | 0.514       | 132.3           | 7.7     | 139.0           | 14.8    | 254.8            | 224.0   | 48.1    |
| <b>49127 CA Run 1 (discordant)</b> |             |                    |             |      |             |        |                |        |                |        |             |                 |         |                 |         |                  |         |         |
| 49127-1                            | 744047      | 979746             | 35254       | 1.59 | 19.235      | 10.5   | 0.176          | 26.0   | 0.02460        | 23.8   | 0.915       | 156.6           | 36.8    | 164.8           | 39.6    | 284.0            | 240.5   | 44.8    |
| 49127-3                            | 1667076     | 2195171            | 6132        | 1.68 | 26.640      | 5.8    | 0.147          | 55.5   | 0.02841        | 55.2   | 0.995       | 180.6           | 98.3    | 139.3           | 72.2    | NA               | NA      | NA      |
| <b>49127 CA Run 2</b>              |             |                    |             |      |             |        |                |        |                |        |             |                 |         |                 |         |                  |         |         |
| 49127 1                            | 1758072     | 1569307            | 26367       | 0.99 | 20.781      | 6.8    | 0.146          | 7.5    | 0.02202        | 3.2    | 0.423       | 140.4           | 4.4     | 138.4           | 9.7     | 104.1            | 160.1   | -34.9   |
| 49127 10                           | 1427984     | 1274661            | 5000        | 1.03 | 22.118      | 10.7   | 0.1353         | 11.2   | 0.02171        | 3.2    | 0.289       | 138.4           | 4.4     | 128.8           | 13.5    | 45.3             | 260.5   | -205.5  |
| 49127 11                           | 1089071     | 972137             | 5000        | 1.53 | 20.94       | 10.7   | 0.1415         | 11     | 0.02149        | 2.7    | 0.244       | 137.1           | 3.6     | 134.3           | 13.9    | 86.2             | 253.9   | -59.0   |
| 49127 13                           | 1442638     | 1287741            | 883376      | 1.01 | 19.968      | 5.8    | 0.1548         | 6.8    | 0.02243        | 3.6    | 0.523       | 143             | 5       | 146.1           | 9.3     | 197.7            | 135.4   | 27.7    |
| 49127 14                           | 23596800    | 21063202           | 1575986     | 5.21 | 20.332      | 1.9    | 0.145          | 3.1    | 0.02139        | 2.5    | 0.791       | 136.5           | 3.3     | 137.5           | 4       | 155.5            | 44.7    | 12.2    |
| 49127 15                           | 14980021    | 13371610           | 330434      | 4.3  | 20.491      | 2.1    | 0.1462         | 3.2    | 0.02173        | 2.5    | 0.766       | 138.6           | 3.4     | 138.5           | 4.2     | 137.3            | 48.6    | -0.9    |
| 49127 16                           | 1262943     | 1127340            | 116927      | 1.03 | 20.516      | 6.2    | 0.146          | 7.1    | 0.02173        | 3.3    | 0.47        | 138.6           | 4.6     | 138.4           | 9.1     | 134.3            | 146.5   | -3.2    |
| 49127 18                           | 553064      | 493681             | 5000        | 1.73 | 20.185      | 12.9   | 0.1486         | 13.6   | 0.02177        | 4.2    | 0.312       | 138.8           | 5.8     | 140.7           | 17.8    | 172.5            | 300.8   | 19.5    |
| 49127 19                           | 867730      | 774561             | 45134       | 1.27 | 20          | 7.3    | 0.152          | 8.1    | 0.02205        | 3.6    | 0.443       | 140.6           | 5       | 143.6           | 10.9    | 194              | 169.8   | 27.5    |
| 49127 2                            | 1589722     | 1419033            | 951211      | 1.27 | 20.054      | 5.1    | 0.1494         | 5.7    | 0.02174        | 2.6    | 0.457       | 138.7           | 3.6     | 141.4           | 7.5     | 187.6            | 117.7   | 26.1    |
| 49127 20                           | 5012435     | 4474248            | 5000        | 1.63 | 22.11       | 2.7    | 0.136          | 4.2    | 0.02182        | 3.2    | 0.76        | 139.1           | 4.4     | 129.5           | 5.1     | 500              | 1.0     | 72.2    |
| 49127 21                           | 1341107     | 1197112            | 5000        | 1.04 | 21.299      | 10.4   | 0.139          | 10.9   | 0.02148        | 3      | 0.277       | 137             | 4.1     | 132.2           | 13.5    | 45.7             | 249.4   | -199.8  |
| 49127 22                           | 2806768     | 2505404            | 54677       | 1.93 | 20.269      | 5.1    | 0.1491         | 6      | 0.02192        | 3.1    | 0.514       | 139.8           | 4.2     | 141.1           | 7.9     | 162.8            | 119.7   | 14.1    |



|          |         |         |        |      |        |      |        |      |         |     |       |       |     |       |      |       |       |         |
|----------|---------|---------|--------|------|--------|------|--------|------|---------|-----|-------|-------|-----|-------|------|-------|-------|---------|
| 49127 23 | 769344  | 686739  | 5000   | 1.45 | 21.851 | 12.8 | 0.1382 | 13.4 | 0.02191 | 4.1 | 0.304 | 139.7 | 5.6 | 131.4 | 16.6 | 15.8  | 309.6 | -784.2  |
| 49127 24 | 1435118 | 1281029 | 88472  | 1.09 | 20.439 | 6.1  | 0.1476 | 6.8  | 0.0219  | 3.1 | 0.454 | 139.6 | 4.3 | 139.8 | 8.9  | 143.3 | 142.6 | 2.6     |
| 49127 25 | 1221431 | 1090285 | 5000   | 1.38 | 22.332 | 11.4 | 0.1343 | 12   | 0.02176 | 4   | 0.329 | 138.8 | 5.4 | 127.9 | 14.5 | 68.8  | 278.0 | -101.7  |
| 49127 26 | 1929505 | 1722333 | 46441  | 1.46 | 20.975 | 5.9  | 0.1438 | 7.1  | 0.02188 | 3.8 | 0.543 | 139.5 | 5.3 | 136.4 | 9    | 82.1  | 141.1 | -69.9   |
| 49127 27 | 1268489 | 1132291 | 5000   | 1.47 | 22.051 | 6.5  | 0.1355 | 7.5  | 0.02168 | 3.8 | 0.505 | 138.3 | 5.2 | 129   | 9.1  | 38    | 157.9 | -263.9  |
| 49127 28 | 2837379 | 2532728 | 35382  | 1.29 | 21.548 | 5.4  | 0.1426 | 6.3  | 0.0223  | 3.2 | 0.502 | 142.2 | 4.4 | 135.4 | 8    | 17.8  | 130.6 | -698.9  |
| 49127 29 | 1359013 | 1213095 | 5000   | 1.23 | 21.738 | 10.9 | 0.1349 | 11.3 | 0.02128 | 2.8 | 0.245 | 135.8 | 3.7 | 128.5 | 13.6 | 3.3   | 263.6 | -4015.2 |
| 49127 3  | 1340713 | 1196760 | 5000   | 1.07 | 21.554 | 10.7 | 0.1388 | 11.3 | 0.02171 | 3.7 | 0.325 | 138.5 | 5   | 132   | 14   | 17.1  | 256.4 | -709.9  |
| 49127 30 | 2948901 | 2632276 | 61717  | 2.01 | 20.468 | 4.6  | 0.146  | 4.9  | 0.02169 | 1.9 | 0.376 | 138.3 | 2.5 | 138.4 | 6.4  | 139.9 | 107.7 | 1.1     |
| 49127 4  | 2676698 | 2389300 | 31403  | 1.73 | 20.176 | 4.9  | 0.147  | 5.5  | 0.02152 | 2.6 | 0.477 | 137.2 | 3.6 | 139.2 | 7.2  | 173.5 | 113.8 | 20.9    |
| 49127 5  | 1459924 | 1303171 | 5000   | 0.99 | 22.831 | 11.2 | 0.1294 | 11.7 | 0.02144 | 3.5 | 0.3   | 136.8 | 4.8 | 123.6 | 13.6 | 123   | 275.9 | -11.2   |
| 49127 7  | 5723753 | 5109191 | 140926 | 1.46 | 20.574 | 3.6  | 0.147  | 4.6  | 0.02194 | 2.9 | 0.618 | 139.9 | 4   | 139.2 | 6    | 127.8 | 85.8  | -9.5    |
| 49127 8  | 2935910 | 2620680 | 32451  | 2.33 | 21.206 | 3.9  | 0.1417 | 4.7  | 0.02181 | 2.6 | 0.555 | 139.1 | 3.6 | 134.6 | 5.9  | 56.1  | 93.4  | -148.0  |
| 49127 9  | 1205409 | 1075984 | 5000   | 1.28 | 22.01  | 11.5 | 0.1373 | 12.2 | 0.02192 | 3.9 | 0.321 | 139.8 | 5.4 | 130.6 | 14.9 | 33.4  | 279.9 | -318.6  |

**TABLE S4: PLESOVICE LA-ICPMS U-Pb ZIRCON GEOCHRONOLOGY**

| Zircon #                     | Composition |                    |             |       |                 |     |                |      |                |     | Ages        |                 |      |                 |      |                  |       |         |
|------------------------------|-------------|--------------------|-------------|-------|-----------------|-----|----------------|------|----------------|-----|-------------|-----------------|------|-----------------|------|------------------|-------|---------|
|                              | U (238 cps) | U (norm) (238 cps) | 206Pb/204Pb | U/Th  | 206Pb/207Pb (%) | 2σ  | 207Pb/235U (%) | 2σ   | 206Pb/238U (%) | 2σ  | Error Corr. | 206Pb/238U (Ma) | 2σ   | 207Pb/235U (Ma) | 2σ   | 206Pb/207Pb (Ma) | 2σ    | % Disc. |
| <b>Plesovice no CA Run 1</b> |             |                    |             |       |                 |     |                |      |                |     |             |                 |      |                 |      |                  |       |         |
| PLES-1                       | 6332766     | 7244076            | 30466       | 10.41 | 19.430          | 1.8 | 0.3936         | 3.0  | 0.05549        | 2.4 | 0.800       | 348.1           | 8.1  | 337.0           | 8.6  | 260.8            | 41.3  | -33.5   |
| PLES-2                       | 8149195     | 9321898            | 909024      | 8.94  | 19.018          | 2.2 | 0.3935         | 3.6  | 0.05430        | 2.8 | 0.787       | 340.9           | 9.3  | 336.9           | 10.2 | 309.8            | 50.1  | -10.0   |
| PLES-3                       | 8439028     | 9653439            | 35296       | 11.27 | 18.287          | 2.7 | 0.4036         | 3.6  | 0.05356        | 2.4 | 0.673       | 336.3           | 8.0  | 344.3           | 10.6 | 398.4            | 59.9  | 15.6    |
| PLES-4                       | 5455789     | 6240899            | 17028       | 10.80 | 19.104          | 2.0 | 0.3971         | 3.3  | 0.05505        | 2.6 | 0.789       | 345.4           | 8.6  | 339.6           | 9.4  | 299.5            | 45.7  | -15.4   |
| PLES-5                       | 5586737     | 6390691            | 6644        | 7.19  | 16.538          | 6.1 | 0.4318         | 6.9  | 0.05182        | 3.4 | 0.487       | 325.7           | 10.7 | 364.5           | 21.2 | 619.3            | 130.8 | 47.4    |
| PLES-6                       | 7017099     | 8026888            | 52298       | 12.34 | 18.241          | 2.0 | 0.3918         | 3.6  | 0.05185        | 3.0 | 0.831       | 325.9           | 9.6  | 335.7           | 10.4 | 404.0            | 45.3  | 19.3    |
| PLES-7                       | 11330346    | 12960829           | 13641       | 9.48  | 18.996          | 1.8 | 0.3909         | 3.6  | 0.05388        | 3.1 | 0.873       | 338.3           | 10.3 | 335.0           | 10.3 | 312.5            | 39.9  | -8.3    |
| PLES-8                       | 7922629     | 9062727            | 71383       | 6.97  | 18.606          | 1.6 | 0.3868         | 2.7  | 0.05222        | 2.1 | 0.795       | 328.1           | 6.8  | 332.0           | 7.6  | 359.4            | 36.7  | 8.7     |
| PLES-9                       | 5832008     | 6671258            | 13681       | 10.34 | 18.979          | 1.7 | 0.3955         | 3.1  | 0.05447        | 2.6 | 0.838       | 341.9           | 8.6  | 338.4           | 8.9  | 314.5            | 38.4  | -8.7    |
| PLES-10                      | 7993970     | 9144335            | 16009       | 7.39  | 19.028          | 1.6 | 0.3736         | 3.0  | 0.05159        | 2.5 | 0.852       | 324.3           | 8.0  | 322.3           | 8.2  | 308.6            | 35.4  | -5.1    |
| PLES-11                      | 4739117     | 5421095            | 40487       | 10.23 | 18.848          | 2.3 | 0.3959         | 3.5  | 0.05414        | 2.7 | 0.770       | 339.9           | 9.0  | 338.7           | 10.2 | 330.2            | 51.1  | -2.9    |
| PLES-12                      | 5101269     | 5835362            | 8619        | 11.80 | 19.493          | 1.7 | 0.3733         | 2.7  | 0.05280        | 2.0 | 0.756       | 331.7           | 6.5  | 322.1           | 7.4  | 253.3            | 40.1  | -30.9   |
| PLES-13                      | 6838628     | 7822734            | 311201      | 9.49  | 18.582          | 2.1 | 0.3903         | 3.4  | 0.05262        | 2.6 | 0.773       | 330.6           | 8.4  | 334.6           | 9.6  | 362.3            | 48.0  | 8.8     |
| PLES-14                      | 4733031     | 5414133            | 22518       | 11.46 | 19.112          | 1.9 | 0.3957         | 3.1  | 0.05487        | 2.4 | 0.779       | 344.3           | 8.0  | 338.5           | 8.8  | 298.6            | 43.9  | -15.3   |
| PLES-15                      | 6251401     | 7151003            | 69525       | 9.51  | 18.164          | 6.2 | 0.3801         | 10.8 | 0.05010        | 8.9 | 0.818       | 315.1           | 27.3 | 327.1           | 30.3 | 413.4            | 139.1 | 23.8    |
| <b>Plesovice no CA Run 2</b> |             |                    |             |       |                 |     |                |      |                |     |             |                 |      |                 |      |                  |       |         |
| PLES 1                       | 7640940     | 7188764            | 3475891     | 10.39 | 18.775          | 1.5 | 0.3969         | 3.1  | 0.05407        | 2.7 | 0.875       | 339.4           | 8.9  | 339.4           | 8.9  | 338.9            | 33.8  | -0.1    |
| PLES 10                      | 8203349     | 7717891            | 278674      | 7.82  | 18.878          | 2.3 | 0.3971         | 3.2  | 0.05439        | 2.3 | 0.712       | 341.4           | 7.7  | 339.5           | 9.4  | 326.6            | 51.8  | -4.5    |
| PLES 11                      | 6360004     | 5983631            | 141751      | 11.36 | 18.757          | 1.8 | 0.4001         | 2.5  | 0.05446        | 1.8 | 0.71        | 341.8           | 5.9  | 341.7           | 7.3  | 341.2            | 39.8  | -0.2    |
| PLES 12                      | 6748903     | 6349516            | 193554      | 10.9  | 18.828          | 2.2 | 0.4001         | 3.1  | 0.05466        | 2.3 | 0.727       | 343             | 7.6  | 341.7           | 9.1  | 332.6            | 48.9  | -3.1    |
| PLES 13                      | 7890831     | 7423867            | 631867      | 10.08 | 19.032          | 2.2 | 0.3984         | 3    | 0.05501        | 2   | 0.678       | 345.2           | 6.9  | 340.5           | 8.7  | 308.1            | 50.4  | -12.0   |
| PLES 14                      | 9461436     | 8901526            | 421926      | 11.7  | 18.728          | 1.8 | 0.4009         | 2.8  | 0.05448        | 2.2 | 0.772       | 342             | 7.2  | 342.3           | 8.2  | 344.6            | 40.4  | 0.8     |
| PLES 15                      | 6095434     | 5734718            | 100432      | 10.27 | 18.646          | 3   | 0.401          | 3.7  | 0.05425        | 2.2 | 0.592       | 340.6           | 7.4  | 342.4           | 10.9 | 354.6            | 68.2  | 3.9     |
| PLES 16                      | 9433873     | 8875595            | 352390      | 9.05  | 18.661          | 1.9 | 0.4042         | 3    | 0.05473        | 2.4 | 0.775       | 343.5           | 7.9  | 344.7           | 8.9  | 352.7            | 43.4  | 2.6     |
| PLES 17                      | 6821496     | 6417813            | 95526       | 10.71 | 18.884          | 2.1 | 0.397          | 2.8  | 0.0544         | 2   | 0.686       | 341.5           | 6.5  | 339.5           | 8.2  | 325.9            | 47.1  | -4.8    |
| PLES 18                      | 4883820     | 4594805            | 125413      | 11.87 | 18.844          | 2.8 | 0.3975         | 3.8  | 0.05435        | 2.6 | 0.68        | 341.1           | 8.6  | 339.8           | 11   | 330.7            | 63.4  | -3.1    |
| PLES 19                      | 5230072     | 4920566            | 1930616     | 12    | 18.678          | 2.3 | 0.3916         | 3.6  | 0.05307        | 2.8 | 0.766       | 333.3           | 9    | 335.5           | 10.3 | 350.7            | 52.5  | 5.0     |
| PLES 2                       | 6587492     | 6197657            | 233580      | 11.11 | 18.889          | 2.4 | 0.392          | 3.1  | 0.05373        | 2   | 0.648       | 337.4           | 6.7  | 335.9           | 9    | 325.2            | 54.3  | -3.8    |
| PLES 20                      | 7692866     | 7237617            | 254832      | 9.47  | 18.827          | 1.9 | 0.3969         | 3    | 0.05422        | 2.3 | 0.761       | 340.4           | 7.5  | 339.4           | 8.6  | 332.7            | 43.9  | -2.3    |
| PLES 21                      | 9688366     | 9115027            | 248248      | 11.71 | 18.741          | 1.9 | 0.4019         | 3    | 0.05465        | 2.3 | 0.779       | 343             | 7.7  | 343             | 8.6  | 343              | 42    | NA      |
| PLES 22                      | 9360399     | 8806469            | 1559801     | 9.35  | 18.737          | 1.7 | 0.4017         | 3    | 0.05462        | 2.4 | 0.818       | 342.8           | 8.1  | 342.9           | 8.7  | 343.6            | 38.8  | 0.2     |
| PLES 23                      | 4994553     | 4698985            | 89908       | 12.22 | 19.083          | 2   | 0.3916         | 2.7  | 0.05422        | 1.9 | 0.687       | 340.4           | 6.2  | 335.5           | 7.8  | 301.9            | 45.4  | -12.8   |
| PLES 24                      | 6699049     | 6302612            | 345662      | 10.94 | 19.013          | 2.5 | 0.3894         | 3.1  | 0.05373        | 1.9 | 0.612       | 337.4           | 6.3  | 334             | 8.9  | 310.4            | 56.3  | -8.7    |
| PLES 25                      | 8715373     | 8199614            | 749096      | 9.3   | 18.806          | 2.1 | 0.4038         | 2.8  | 0.0551         | 1.9 | 0.675       | 345.8           | 6.4  | 344.4           | 8.2  | 335.3            | 47.2  | -3.1    |
| PLES 26                      | 9312910     | 8761790            | 355916      | 7     | 18.911          | 1.8 | 0.3987         | 3.1  | 0.05471        | 2.6 | 0.827       | 343.4           | 8.7  | 340.7           | 9.1  | 322.6            | 40    | -6.4    |
| PLES 27                      | 6254734     | 5884591            | 367729      | 11.22 | 18.87           | 2   | 0.3948         | 2.6  | 0.05405        | 1.7 | 0.64        | 339.3           | 5.6  | 337.9           | 7.5  | 327.5            | 45.7  | -3.6    |
| PLES 28                      | 3948978     | 3715285            | 453797      | 12.66 | 18.843          | 2.6 | 0.3934         | 3.1  | 0.05379        | 1.8 | 0.572       | 337.8           | 5.9  | 336.9           | 8.9  | 330.8            | 57.9  | -2.1    |
| PLES 29                      | 10761070    | 10124251           | 251304      | 10.43 | 18.749          | 2.2 | 0.3977         | 3.3  | 0.05411        | 2.5 | 0.756       | 339.7           | 8.2  | 340             | 9.5  | 342.1            | 48.7  | 0.7     |

|         |         |         |        |       |        |     |        |     |         |     |       |       |     |       |      |       |      |      |
|---------|---------|---------|--------|-------|--------|-----|--------|-----|---------|-----|-------|-------|-----|-------|------|-------|------|------|
| PLES 3  | 4627135 | 4353310 | 99796  | 12.89 | 19.038 | 2.1 | 0.3885 | 3.3 | 0.05366 | 2.5 | 0.765 | 337   | 8.2 | 333.3 | 9.3  | 307.4 | 47.9 | -9.6 |
| PLES 30 | 6085308 | 5725191 | 111749 | 11.39 | 18.854 | 1.8 | 0.3922 | 3.1 | 0.05365 | 2.6 | 0.829 | 336.9 | 8.5 | 335.9 | 9    | 329.5 | 39.7 | -2.2 |
| PLES 4  | 6713007 | 6315744 | 149313 | 10.72 | 18.87  | 1.7 | 0.3979 | 2.7 | 0.05448 | 2.1 | 0.779 | 342   | 7.1 | 340.1 | 7.9  | 327.5 | 38.8 | -4.4 |
| PLES 5  | 6337858 | 5962796 | 291687 | 11.28 | 18.854 | 2.4 | 0.3956 | 2.9 | 0.05412 | 1.7 | 0.575 | 339.8 | 5.6 | 338.5 | 8.5  | 329.4 | 54.5 | -3.2 |
| PLES 6  | 9082358 | 8544882 | 253595 | 9.26  | 18.955 | 2.3 | 0.3977 | 3   | 0.0547  | 1.9 | 0.646 | 343.3 | 6.4 | 340   | 8.6  | 317.3 | 51.7 | -8.2 |
| PLES 7  | 6768072 | 6367551 | 181777 | 10.63 | 18.816 | 2   | 0.3979 | 2.8 | 0.05432 | 2   | 0.708 | 341   | 6.5 | 340.1 | 8.1  | 334   | 44.6 | -2.1 |
| PLES 8  | 6468241 | 6085463 | 660847 | 12.91 | 18.808 | 2.5 | 0.3993 | 3.3 | 0.05449 | 2.2 | 0.656 | 342   | 7.2 | 341.1 | 9.5  | 335   | 56.3 | -2.1 |
| PLES 9  | 5314619 | 5000110 | 152767 | 10.88 | 18.699 | 2.3 | 0.4015 | 3.7 | 0.05447 | 2.9 | 0.78  | 341.9 | 9.7 | 342.7 | 10.8 | 348.2 | 52.5 | 1.8  |

**Composition**

**Ages**

| Zircon | U         | U (norm)  | 206Pb/ | U/Th | 206Pb/ | 2 $\sigma$ | 207Pb/ | 2 $\sigma$ | 206Pb/ | 2 $\sigma$ | Corr. | 206Pb/ | 2 $\sigma$ | 207Pb/ | 2 $\sigma$ | 206Pb/ | 2 $\sigma$ | %     |
|--------|-----------|-----------|--------|------|--------|------------|--------|------------|--------|------------|-------|--------|------------|--------|------------|--------|------------|-------|
| #      | (238 cps) | (238 cps) | 204Pb  |      | 207Pb  | (%)        | 235U   | (%)        | 238U   | (%)        |       | 238U   | (Ma)       | 235U   | (Ma)       | 207Pb  | (Ma)       | Disc. |

**Plesovice CA Run 1**

|         |         |         |        |       |        |     |        |      |         |      |       |       |      |       |      |       |       |       |
|---------|---------|---------|--------|-------|--------|-----|--------|------|---------|------|-------|-------|------|-------|------|-------|-------|-------|
| PLES-1  | 3652845 | 4809989 | 198348 | 11.56 | 18.777 | 2.1 | 0.3976 | 3.2  | 0.05416 | 2.4  | 0.757 | 340.0 | 8.0  | 339.9 | 9.2  | 338.8 | 47.0  | -0.4  |
| PLES-2  | 6063941 | 7984869 | 38777  | 6.17  | 18.772 | 1.8 | 0.3976 | 3.5  | 0.05416 | 3.0  | 0.862 | 340.0 | 9.9  | 339.9 | 10.0 | 339.4 | 39.6  | -0.2  |
| PLES-3  | 3710232 | 4885555 | 43405  | 9.73  | 18.785 | 2.1 | 0.4000 | 3.2  | 0.05452 | 2.4  | 0.765 | 342.2 | 8.2  | 341.6 | 9.3  | 337.8 | 46.7  | -1.3  |
| PLES-4  | 2791011 | 3675144 | 13699  | 10.22 | 18.896 | 2.8 | 0.3919 | 4.1  | 0.05373 | 3.0  | 0.731 | 337.4 | 9.8  | 335.8 | 11.7 | 324.5 | 63.3  | -4.0  |
| PLES-5  | 2405240 | 3167169 | 27229  | 6.49  | 18.819 | 2.2 | 0.3954 | 3.9  | 0.05399 | 3.2  | 0.825 | 338.9 | 10.6 | 338.3 | 11.2 | 333.7 | 50.0  | -1.6  |
| PLES-6  | 3349149 | 4410089 | 36349  | 7.94  | 18.686 | 1.4 | 0.3914 | 2.3  | 0.05307 | 1.7  | 0.773 | 333.3 | 5.7  | 335.4 | 6.4  | 349.7 | 32.3  | 4.7   |
| PLES-7  | 6052893 | 7970322 | 21642  | 6.44  | 18.988 | 2.0 | 0.3920 | 3.3  | 0.05400 | 2.6  | 0.785 | 339.1 | 8.5  | 335.8 | 9.3  | 313.4 | 46.0  | -8.2  |
| PLES-8  | 4766646 | 6276619 | 26111  | 10.13 | 19.253 | 1.8 | 0.3859 | 3.5  | 0.05390 | 3.0  | 0.851 | 338.5 | 9.8  | 331.4 | 9.8  | 281.8 | 41.7  | -20.1 |
| PLES-9  | 4429343 | 5832465 | 13733  | 10.47 | 19.032 | 2.4 | 0.3844 | 3.5  | 0.05309 | 2.6  | 0.728 | 333.4 | 8.3  | 330.3 | 9.9  | 308.2 | 54.8  | -8.2  |
| PLES-10 | 6114471 | 8051407 | 17676  | 6.35  | 19.213 | 2.1 | 0.3812 | 3.6  | 0.05315 | 2.9  | 0.809 | 333.8 | 9.5  | 327.9 | 10.1 | 286.5 | 48.5  | -16.5 |
| PLES-11 | 7585849 | 9988886 | 33083  | 10.74 | 19.484 | 2.2 | 0.3826 | 3.7  | 0.05409 | 3.0  | 0.810 | 339.6 | 9.9  | 328.9 | 10.3 | 254.4 | 49.7  | -33.5 |
| PLES-12 | 6435835 | 8474572 | 11443  | 10.51 | 19.405 | 2.9 | 0.3933 | 3.8  | 0.05538 | 2.5  | 0.660 | 347.5 | 8.6  | 336.8 | 11.0 | 263.8 | 66.1  | -31.7 |
| PLES-14 | 4600034 | 6057227 | 6611   | 12.07 | 19.862 | 4.4 | 0.3855 | 11.0 | 0.05556 | 10.1 | 0.915 | 348.5 | 34.3 | 331.1 | 31.2 | 210.0 | 102.9 | -66.0 |
| PLES-15 | 3803583 | 5008478 | 5199   | 11.21 | 19.743 | 2.3 | 0.3839 | 3.8  | 0.05499 | 3.0  | 0.795 | 345.1 | 10.1 | 329.9 | 10.6 | 223.9 | 52.7  | -54.1 |

**Plesovice CA Run 1 (discordant)**

|         |         |         |       |      |        |     |        |      |         |      |       |       |      |       |      |      |       |        |
|---------|---------|---------|-------|------|--------|-----|--------|------|---------|------|-------|-------|------|-------|------|------|-------|--------|
| PLES-13 | 4675079 | 6156045 | 16221 | 9.46 | 21.128 | 4.7 | 0.3948 | 25.0 | 0.06052 | 24.5 | 0.982 | 378.8 | 90.2 | 337.9 | 71.8 | 64.9 | 110.9 | -483.6 |
|---------|---------|---------|-------|------|--------|-----|--------|------|---------|------|-------|-------|------|-------|------|------|-------|--------|

**Plesovice CA Run 2**

|         |         |         |        |       |        |     |        |     |         |     |       |       |      |       |      |       |      |       |
|---------|---------|---------|--------|-------|--------|-----|--------|-----|---------|-----|-------|-------|------|-------|------|-------|------|-------|
| Ples 1  | 4773157 | 4260661 | 87745  | 10.53 | 18.835 | 2.7 | 0.4004 | 3.3 | 0.05473 | 1.9 | 0.589 | 343.5 | 6.5  | 342   | 9.6  | 331.8 | 60.4 | -3.5  |
| Ples 10 | 7577053 | 6763502 | 599546 | 9.19  | 18.963 | 2.5 | 0.3972 | 3.5 | 0.05465 | 2.5 | 0.717 | 343   | 8.5  | 339.6 | 10.2 | 316.3 | 56   | -8.4  |
| Ples 11 | 3921938 | 3500838 | 151852 | 11.13 | 18.648 | 1.8 | 0.4058 | 2.7 | 0.0549  | 2   | 0.729 | 344.6 | 6.6  | 345.8 | 7.9  | 354.4 | 41.7 | 2.8   |
| Ples 12 | 5063522 | 4519850 | 81099  | 10.79 | 18.925 | 2.3 | 0.401  | 3.6 | 0.05506 | 2.8 | 0.779 | 345.5 | 9.5  | 342.3 | 10.6 | 321   | 51.9 | -7.6  |
| Ples 13 | 4166372 | 3719027 | 268490 | 11.48 | 18.925 | 1.6 | 0.4004 | 2.8 | 0.05498 | 2.3 | 0.822 | 345   | 7.8  | 341.9 | 8.2  | 321   | 36.7 | -7.5  |
| Ples 14 | 3660499 | 3267470 | 81640  | 11.78 | 18.693 | 3   | 0.4033 | 4.4 | 0.0547  | 3.2 | 0.728 | 343.3 | 10.7 | 344   | 12.9 | 348.9 | 68.3 | 1.6   |
| Ples 15 | 3642072 | 3251021 | 313142 | 11.57 | 18.966 | 2   | 0.4007 | 3.5 | 0.05515 | 2.8 | 0.81  | 346.1 | 9.4  | 342.2 | 10   | 315.9 | 46.1 | -9.6  |
| Ples 16 | 3530141 | 3151108 | 233754 | 11.61 | 18.994 | 3.4 | 0.4007 | 4.4 | 0.05522 | 2.9 | 0.647 | 346.5 | 9.7  | 342.1 | 12.8 | 312.6 | 76.7 | -10.8 |
| Ples 17 | 4896592 | 4370843 | 341651 | 10.51 | 18.612 | 2   | 0.4102 | 2.9 | 0.05539 | 2.1 | 0.716 | 347.6 | 7.1  | 349   | 8.6  | 358.7 | 45.9 | 3.1   |
| Ples 18 | 6019279 | 5372987 | 399392 | 9.9   | 18.818 | 2.3 | 0.4066 | 2.9 | 0.05552 | 1.8 | 0.625 | 348.3 | 6.2  | 346.4 | 8.6  | 333.8 | 51.9 | -4.3  |
| Ples 19 | 8640789 | 7713024 | 343685 | 6.85  | 18.7   | 2.1 | 0.408  | 3.1 | 0.05536 | 2.2 | 0.721 | 347.4 | 7.5  | 347.5 | 9.1  | 348   | 48.5 | 0.2   |
| Ples 2  | 4013910 | 3582935 | 319188 | 11.04 | 18.76  | 2   | 0.3994 | 3.2 | 0.05437 | 2.5 | 0.78  | 341.3 | 8.4  | 341.2 | 9.3  | 340.7 | 45.6 | -0.2  |
| Ples 20 | 5577652 | 4978777 | 232811 | 10.13 | 18.573 | 2.4 | 0.4102 | 3.4 | 0.05528 | 2.4 | 0.713 | 346.9 | 8.2  | 349   | 10   | 363.4 | 53.6 | 4.5   |
| Ples 21 | 8465635 | 7556676 | 236821 | 5.97  | 18.615 | 2.1 | 0.4025 | 3.3 | 0.05436 | 2.6 | 0.776 | 341.2 | 8.5  | 343.4 | 9.7  | 358.3 | 47.2 | 4.8   |

|         |         |         |         |       |        |     |        |     |         |     |       |       |     |       |      |       |      |       |
|---------|---------|---------|---------|-------|--------|-----|--------|-----|---------|-----|-------|-------|-----|-------|------|-------|------|-------|
| Ples 22 | 8634642 | 7707537 | 2259381 | 6.57  | 18.807 | 2.4 | 0.4106 | 3.3 | 0.05603 | 2.2 | 0.668 | 351.4 | 7.5 | 349.3 | 9.7  | 335.1 | 55.2 | -4.9  |
| Ples 23 | 5277041 | 4710443 | 617220  | 11.76 | 18.794 | 2.3 | 0.4014 | 3.7 | 0.05473 | 3   | 0.794 | 343.5 | 9.9 | 342.6 | 10.9 | 336.7 | 51.4 | -2.0  |
| Ples 24 | 4841910 | 4322032 | 85245   | 9.64  | 18.694 | 2.3 | 0.4028 | 3.3 | 0.05463 | 2.3 | 0.703 | 342.9 | 7.7 | 343.7 | 9.5  | 348.8 | 52.4 | 1.7   |
| Ples 25 | 3961729 | 3536357 | 44589   | 10.39 | 19.173 | 2.7 | 0.3903 | 3.6 | 0.0543  | 2.4 | 0.658 | 340.9 | 7.8 | 334.6 | 10.2 | 291.3 | 61.6 | -17.0 |
| Ples 26 | 5430391 | 4847328 | 162548  | 10.43 | 18.789 | 2.5 | 0.4005 | 3.1 | 0.0546  | 1.9 | 0.596 | 342.7 | 6.2 | 342   | 9    | 337.3 | 56.4 | -1.6  |
| Ples 27 | 6356981 | 5674429 | 205513  | 8.43  | 18.793 | 3.2 | 0.3972 | 4   | 0.05416 | 2.5 | 0.614 | 340   | 8.1 | 339.6 | 11.5 | 336.8 | 71.4 | -1.0  |
| Ples 28 | 6550131 | 5846841 | 198228  | 9.36  | 18.784 | 2.5 | 0.4012 | 3.3 | 0.05468 | 2.2 | 0.659 | 343.2 | 7.2 | 342.5 | 9.5  | 337.9 | 55.7 | -1.6  |
| Ples 29 | 6234683 | 5565263 | 1114465 | 9.13  | 18.629 | 2.4 | 0.3939 | 3.2 | 0.05325 | 2.1 | 0.657 | 334.4 | 6.8 | 337.2 | 9.1  | 356.6 | 54   | 6.2   |
| Ples 3  | 7011146 | 6258356 | 392546  | 9.63  | 18.904 | 2.1 | 0.3974 | 3   | 0.05452 | 2.2 | 0.725 | 342.2 | 7.4 | 339.8 | 8.8  | 323.4 | 47.6 | -5.8  |
| Ples 30 | 6051088 | 5401380 | 1012948 | 9.16  | 18.813 | 2.2 | 0.3969 | 3.2 | 0.05418 | 2.3 | 0.724 | 340.1 | 7.6 | 339.4 | 9.2  | 334.4 | 49.7 | -1.7  |
| Ples 4  | 5766499 | 5147348 | 47466   | 9.58  | 18.87  | 3.3 | 0.3974 | 4.4 | 0.05441 | 2.8 | 0.648 | 341.5 | 9.4 | 339.7 | 12.6 | 327.6 | 75.3 | -4.2  |
| Ples 5  | 6555216 | 5851380 | 533642  | 9.72  | 18.612 | 2.2 | 0.4013 | 3   | 0.05419 | 2.1 | 0.681 | 340.2 | 6.8 | 342.6 | 8.8  | 358.6 | 49.8 | 5.1   |
| Ples 6  | 6350067 | 5668258 | 995204  | 8.39  | 18.839 | 2   | 0.4034 | 2.8 | 0.05515 | 2   | 0.704 | 346.1 | 6.7 | 344.1 | 8.2  | 331.2 | 45.3 | -4.5  |
| Ples 7  | 8155578 | 7279910 | 513284  | 8.23  | 18.904 | 2.2 | 0.4036 | 3.4 | 0.05536 | 2.6 | 0.767 | 347.3 | 8.7 | 344.2 | 9.8  | 323.4 | 49.2 | -7.4  |
| Ples 8  | 6257155 | 5585322 | 89714   | 8.84  | 18.604 | 2.8 | 0.4038 | 4.1 | 0.0545  | 2.9 | 0.718 | 342.1 | 9.8 | 344.4 | 11.9 | 359.6 | 64.1 | 4.9   |
| Ples 9  | 4700873 | 4196138 | 644052  | 10.77 | 18.952 | 2.6 | 0.3988 | 3.7 | 0.05484 | 2.7 | 0.716 | 344.2 | 9   | 340.8 | 10.8 | 317.7 | 59.3 | -8.3  |

**TABLE S5: TEMORA 2 LA-ICPMS U-Pb ZIRCON GEOCHRONOLOGY**

| Zircon #                                 | Composition |                    |             |      |                 |     |            |        |                |        | Ages        |                 |         |                 |                  |         |       |        |
|------------------------------------------|-------------|--------------------|-------------|------|-----------------|-----|------------|--------|----------------|--------|-------------|-----------------|---------|-----------------|------------------|---------|-------|--------|
|                                          | U (238 cps) | U (norm) (238 cps) | 206Pb/204Pb | U/Th | 206Pb/207Pb (%) | 2σ  | 207Pb/235U | 2σ (%) | 206Pb/238U (%) | 2σ (%) | Error Corr. | 206Pb/238U (Ma) | 2σ (Ma) | 207Pb/235U (Ma) | 206Pb/207Pb (Ma) | % Disc. |       |        |
| <b>Temora 2 no CA Run 1</b>              |             |                    |             |      |                 |     |            |        |                |        |             |                 |         |                 |                  |         |       |        |
| TEM-1                                    | 771982      | 883074             | 308674      | 3.33 | 17.67           | 5.0 | 0.535      | 6.5    | 0.06864        | 4.2    | 0.644       | 427.9           | 17.4    | 435.3           | 23.0             | 474.2   | 110.2 | 9.8    |
| TEM-2                                    | 17390593    | 19893170           | 41775       | 1.46 | 18.01           | 2.5 | 0.520      | 3.6    | 0.06799        | 2.5    | 0.707       | 424.0           | 10.3    | 425.3           | 12.4             | 432.0   | 56.2  | 1.8    |
| TEM-3                                    | 1845010     | 2110515            | 84894       | 3.91 | 18.38           | 3.2 | 0.507      | 4.4    | 0.06755        | 3.0    | 0.683       | 421.4           | 12.3    | 416.1           | 15.1             | 386.9   | 72.4  | -8.9   |
| TEM-4                                    | 4871818     | 5572892            | 24198       | 2.89 | 17.60           | 4.8 | 0.540      | 5.3    | 0.06896        | 2.4    | 0.444       | 429.9           | 9.8     | 438.4           | 19.0             | 483.4   | 105.5 | 11.1   |
| TEM-5                                    | 1664898     | 1904484            | 17194       | 1.67 | 18.46           | 2.8 | 0.518      | 4.0    | 0.06936        | 2.8    | 0.698       | 432.3           | 11.6    | 423.7           | 13.8             | 377.5   | 64.0  | -14.5  |
| TEM-6                                    | 1362606     | 1558690            | 18099       | 4.57 | 17.92           | 3.1 | 0.533      | 4.3    | 0.06927        | 2.9    | 0.684       | 431.8           | 12.3    | 433.6           | 15.2             | 443.1   | 69.8  | 2.5    |
| TEM-7                                    | 1084019     | 1240013            | 32424       | 3.44 | 17.64           | 3.8 | 0.523      | 5.1    | 0.06694        | 3.4    | 0.663       | 417.7           | 13.7    | 427.1           | 17.9             | 477.9   | 84.9  | 12.6   |
| TEM-8                                    | 11685742    | 13367367           | 55825       | 1.47 | 18.01           | 1.5 | 0.510      | 3.0    | 0.06663        | 2.6    | 0.869       | 415.8           | 10.5    | 418.3           | 10.3             | 431.8   | 33.1  | 3.7    |
| TEM-9                                    | 3195134     | 3654927            | 122329      | 1.99 | 18.25           | 1.9 | 0.505      | 3.7    | 0.06681        | 3.2    | 0.861       | 416.9           | 12.9    | 414.9           | 12.6             | 403.5   | 42.2  | -3.3   |
| TEM-10                                   | 3318163     | 3795660            | 131674      | 2.01 | 18.13           | 1.9 | 0.522      | 3.1    | 0.06870        | 2.5    | 0.797       | 428.3           | 10.3    | 426.6           | 10.8             | 417.0   | 42.0  | -2.7   |
| TEM-11                                   | 1751352     | 2003378            | 9518        | 4.13 | 19.02           | 2.8 | 0.501      | 3.7    | 0.06915        | 2.4    | 0.651       | 431.0           | 10.2    | 412.4           | 12.7             | 309.7   | 64.7  | -39.2  |
| TEM-13                                   | 2476537     | 2832921            | 5567        | 1.94 | 18.18           | 3.3 | 0.507      | 4.9    | 0.06686        | 3.6    | 0.736       | 417.2           | 14.5    | 416.3           | 16.7             | 411.2   | 74.1  | -1.5   |
| TEM-14                                   | 4035773     | 4616537            | 141229      | 4.03 | 17.91           | 2.3 | 0.525      | 3.3    | 0.06823        | 2.3    | 0.708       | 425.5           | 9.6     | 428.6           | 11.6             | 445.4   | 52.0  | 4.5    |
| TEM-15                                   | 4135288     | 4730373            | 32072       | 2.14 | 18.27           | 3.0 | 0.508      | 4.6    | 0.06733        | 3.5    | 0.764       | 420.1           | 14.3    | 417.0           | 15.8             | 400.0   | 66.6  | -5.0   |
| <b>Temora 2 no CA Run 1 (discordant)</b> |             |                    |             |      |                 |     |            |        |                |        |             |                 |         |                 |                  |         |       |        |
| TEM-12                                   | 786181      | 899315             | 6390        | 1.28 | 18.83           | 8.0 | 0.889      | 60.5   | 0.12149        | 60.0   | 0.991       | 739.1           | 419.1   | 646.0           | 291.3            | 332.7   | 181.9 | -122.2 |
| <b>Temora 2 no CA Run 2</b>              |             |                    |             |      |                 |     |            |        |                |        |             |                 |         |                 |                  |         |       |        |
| TEM 1                                    | 1287979     | 1211759            | 49162       | 3.91 | 18.305          | 2.4 | 0.488      | 3.9    | 0.0648         | 3      | 0.774       | 404.8           | 11.7    | 403.5           | 12.9             | 396.1   | 54.8  | -2.2   |
| TEM 10                                   | 1680248     | 1580814            | 52641       | 1.88 | 18.525          | 2.9 | 0.5012     | 4.2    | 0.0674         | 3.1    | 0.722       | 420.3           | 12.4    | 412.5           | 14.4             | 369.3   | 66    | -13.8  |
| TEM 11                                   | 10519152    | 9896649            | 125663      | 2.19 | 18.093          | 1.5 | 0.5172     | 2.8    | 0.0679         | 2.3    | 0.839       | 423.5           | 9.5     | 423.2           | 9.6              | 422.1   | 33.7  | -0.3   |
| TEM 12                                   | 5095069     | 4793553            | 64074       | 1.85 | 18.307          | 2.2 | 0.5162     | 3      | 0.0686         | 2      | 0.678       | 427.5           | 8.4     | 422.6           | 10.4             | 395.8   | 49.6  | -8.0   |
| TEM 13                                   | 1531942     | 1441285            | 32596       | 3.86 | 18.16           | 2.7 | 0.5033     | 4.1    | 0.0663         | 3.1    | 0.759       | 413.9           | 12.4    | 413.9           | 13.9             | 413.9   | 59.4  | NA     |
| TEM 14                                   | 795216      | 748157             | 46718       | 2.36 | 18.511          | 4.9 | 0.5062     | 6.7    | 0.068          | 4.6    | 0.679       | 424             | 18.8    | 415.9           | 23               | 371     | 111.4 | -14.3  |
| TEM 15                                   | 3184630     | 2996170            | 258570      | 2.03 | 18.017          | 2.9 | 0.496      | 4.2    | 0.0649         | 3      | 0.715       | 405             | 11.8    | 409             | 14.2             | 431.5   | 65.6  | 6.1    |
| TEM 16                                   | 7519673     | 7074673            | 183024      | 2.1  | 17.924          | 2   | 0.516      | 3      | 0.0671         | 2.3    | 0.759       | 418.7           | 9.3     | 422.5           | 10.5             | 443     | 43.9  | 5.5    |
| TEM 17                                   | 3477525     | 3271732            | 98274       | 2.17 | 18.078          | 1.9 | 0.5132     | 3.5    | 0.0673         | 3      | 0.844       | 420             | 12.1    | 420.6           | 12.1             | 424     | 42    | 0.9    |
| TEM 18                                   | 18036007    | 16968671           | 1707168     | 1.69 | 18.103          | 2   | 0.5505     | 3.1    | 0.0723         | 2.4    | 0.767       | 450             | 10.4    | 445.3           | 11.2             | 420.8   | 44.5  | -6.9   |
| TEM 19                                   | 1357461     | 1277129            | 62264       | 4.21 | 18.34           | 4.1 | 0.4966     | 5.3    | 0.0661         | 3.4    | 0.639       | 412.5           | 13.5    | 409.4           | 17.9             | 391.8   | 91.6  | -5.3   |
| TEM 2                                    | 1348521     | 1268718            | 20551       | 3.76 | 18.646          | 3.7 | 0.4974     | 4.6    | 0.0673         | 2.7    | 0.592       | 419.8           | 11.1    | 409.9           | 15.6             | 354.5   | 84.1  | -18.4  |
| TEM 20                                   | 1555004     | 1462982            | 193361      | 2.93 | 18.161          | 2.6 | 0.5054     | 4.5    | 0.0666         | 3.6    | 0.814       | 415.6           | 14.7    | 415.3           | 15.2             | 413.7   | 58.1  | -0.5   |
| TEM 21                                   | 2020086     | 1900541            | 187120      | 4.47 | 18.303          | 2.3 | 0.5006     | 3.4    | 0.0665         | 2.5    | 0.737       | 415             | 10.1    | 412.1           | 11.5             | 396.3   | 51.6  | -4.7   |
| TEM 22                                   | 1516967     | 1427196            | 41218       | 4.19 | 18.257          | 2.9 | 0.5028     | 4      | 0.0666         | 2.7    | 0.683       | 415.6           | 10.9    | 413.6           | 13.4             | 402     | 64.6  | -3.4   |
| TEM 23                                   | 5585812     | 5255254            | 366736      | 2.31 | 18.088          | 1.8 | 0.5039     | 3      | 0.0661         | 2.4    | 0.789       | 412.8           | 9.4     | 414.3           | 10.1             | 422.8   | 40.9  | 2.4    |
| TEM 24                                   | 1942921     | 1827943            | 65799       | 2.95 | 18.388          | 3.2 | 0.4988     | 3.9    | 0.0666         | 2.3    | 0.579       | 415.4           | 9.1     | 410.9           | 13.2             | 385.9   | 71.5  | -7.6   |
| TEM 25                                   | 5512001     | 5185811            | 419441      | 3.05 | 18.191          | 2.7 | 0.5141     | 3.9    | 0.0679         | 2.8    | 0.719       | 423.2           | 11.4    | 421.2           | 13.3             | 410.1   | 59.9  | -3.2   |
| TEM 26                                   | 8156220     | 7673551            | 210138      | 2.14 | 17.842          | 2.5 | 0.5182     | 3.5    | 0.0671         | 2.4    | 0.699       | 418.6           | 9.8     | 424             | 12               | 453.3   | 55.2  | 7.7    |
| TEM 27                                   | 1784755     | 1679137            | 35093       | 2.33 | 18.187          | 2.7 | 0.5043     | 3.7    | 0.0666         | 2.5    | 0.677       | 415.4           | 10      | 414.6           | 12.5             | 410.5   | 60.6  | -1.2   |
| TEM 28                                   | 1842981     | 1733917            | 56860       | 2.16 | 18.359          | 3.4 | 0.4969     | 4.6    | 0.0662         | 3.1    | 0.676       | 413.2           | 12.6    | 409.6           | 15.7             | 389.4   | 76.7  | -6.1   |

|        |         |         |         |      |        |     |        |     |        |     |       |       |      |       |      |       |      |       |
|--------|---------|---------|---------|------|--------|-----|--------|-----|--------|-----|-------|-------|------|-------|------|-------|------|-------|
| TEM 29 | 3790541 | 3566224 | 1159095 | 2.9  | 18.188 | 2.5 | 0.5129 | 3.8 | 0.0677 | 2.9 | 0.754 | 422.2 | 11.8 | 420.4 | 13.2 | 410.5 | 56.3 | -2.9  |
| TEM 3  | 1087943 | 1023561 | 2042540 | 2.93 | 18.082 | 4.3 | 0.5056 | 6.1 | 0.0663 | 4.3 | 0.708 | 414   | 17.4 | 415.5 | 20.9 | 423.5 | 96.4 | 2.2   |
| TEM 30 | 1886919 | 1775255 | 96164   | 2.09 | 18.074 | 2.9 | 0.508  | 4.6 | 0.0666 | 3.6 | 0.778 | 415.7 | 14.4 | 417.1 | 15.8 | 424.5 | 64.7 | 2.1   |
| TEM 4  | 1374632 | 1293284 | 52883   | 2.58 | 18.146 | 2.9 | 0.4956 | 4.4 | 0.0653 | 3.3 | 0.758 | 407.5 | 13.2 | 408.7 | 14.8 | 415.6 | 64.2 | 1.9   |
| TEM 5  | 2080100 | 1957004 | 30481   | 2.01 | 18.122 | 3.7 | 0.5075 | 4.5 | 0.0667 | 2.5 | 0.557 | 416.4 | 10   | 416.7 | 15.3 | 418.5 | 83   | 0.5   |
| TEM 6  | 2274887 | 2140264 | 230392  | 2.11 | 18.193 | 2.4 | 0.5017 | 3.6 | 0.0662 | 2.7 | 0.746 | 413.4 | 10.8 | 412.9 | 12.3 | 409.8 | 54.1 | -0.9  |
| TEM 7  | 1574982 | 1481778 | 21274   | 3.47 | 18.536 | 3.5 | 0.5065 | 4.1 | 0.0681 | 2.2 | 0.526 | 424.9 | 8.9  | 416.1 | 14.1 | 367.9 | 79.1 | -15.5 |
| TEM 8  | 3461906 | 3257037 | 138532  | 3.26 | 18.489 | 2.5 | 0.4961 | 3.6 | 0.0666 | 2.6 | 0.716 | 415.4 | 10.5 | 409.1 | 12.2 | 373.6 | 57   | -11.2 |
| TEM 9  | 1507267 | 1418070 | 27664   | 2.6  | 18.742 | 3.2 | 0.5016 | 3.9 | 0.0682 | 2.3 | 0.59  | 425.4 | 9.5  | 412.8 | 13.3 | 342.9 | 71.8 | -24.1 |

**Composition**

**Ages**

| Zircon #                 | U (238 cps) | U (norm) (238 cps) | 206Pb/204Pb | U/Th | 206Pb/207Pb (%) | 2σ  | 207Pb/235U (%) | 2σ   | 206Pb/238U (%) | 2σ  | Error Corr. | 206Pb/238U (Ma) | 2σ   | 207Pb/235U (Ma) | 2σ   | 206Pb/207Pb (Ma) | 2σ    | % Disc. |
|--------------------------|-------------|--------------------|-------------|------|-----------------|-----|----------------|------|----------------|-----|-------------|-----------------|------|-----------------|------|------------------|-------|---------|
| <b>Temora 2 CA Run 1</b> |             |                    |             |      |                 |     |                |      |                |     |             |                 |      |                 |      |                  |       |         |
| TEM-1                    | 1468416     | 1933580            | 3978        | 2.93 | 18.910          | 2.8 | 0.4931         | 4.2  | 0.06766        | 3.1 | 0.741       | 422.0           | 12.6 | 407.0           | 14.0 | 322.8            | 63.5  | -30.7   |
| TEM-2                    | 878868      | 1157275            | 9978        | 3.42 | 18.105          | 3.2 | 0.5039         | 4.2  | 0.06619        | 2.7 | 0.638       | 413.2           | 10.7 | 414.3           | 14.3 | 420.7            | 72.1  | 1.8     |
| TEM-3                    | 1293231     | 1702900            | 3892        | 4.08 | 18.886          | 3.1 | 0.4835         | 4.5  | 0.06625        | 3.3 | 0.730       | 413.5           | 13.1 | 400.5           | 14.8 | 325.7            | 69.3  | -27.0   |
| TEM-4                    | 1118448     | 1472749            | 5386        | 3.12 | 17.995          | 6.1 | 0.5133         | 6.7  | 0.06702        | 2.9 | 0.431       | 418.2           | 11.8 | 420.6           | 23.2 | 434.3            | 135.6 | 3.7     |
| TEM-5                    | 1964009     | 2586165            | 45450       | 2.58 | 17.965          | 2.0 | 0.5282         | 4.0  | 0.06885        | 3.4 | 0.856       | 429.2           | 14.1 | 430.6           | 13.9 | 438.0            | 45.5  | 2.0     |
| TEM-6                    | 1813224     | 2387615            | 32428       | 2.96 | 18.204          | 2.8 | 0.5224         | 4.4  | 0.06901        | 3.4 | 0.775       | 430.2           | 14.3 | 426.8           | 15.4 | 408.4            | 62.5  | -5.3    |
| TEM-7                    | 710590      | 935690             | 6081        | 2.42 | 17.953          | 5.8 | 0.5023         | 7.7  | 0.06543        | 5.1 | 0.660       | 408.5           | 20.0 | 413.2           | 26.0 | 439.5            | 128.2 | 7.0     |
| TEM-8                    | 1648203     | 2170319            | 3012        | 2.10 | 19.635          | 2.5 | 0.4670         | 3.5  | 0.06653        | 2.4 | 0.701       | 415.2           | 9.8  | 389.1           | 11.2 | 236.6            | 57.1  | -75.5   |
| TEM-9                    | 2214750     | 2916336            | 14338       | 2.29 | 18.332          | 2.8 | 0.4985         | 4.7  | 0.06631        | 3.7 | 0.797       | 413.9           | 14.9 | 410.7           | 15.8 | 392.8            | 63.2  | -5.4    |
| TEM-10                   | 1474534     | 1941635            | 9956        | 1.67 | 18.687          | 2.6 | 0.5075         | 3.5  | 0.06882        | 2.4 | 0.682       | 429.0           | 10.0 | 416.8           | 12.0 | 349.6            | 58.2  | -22.7   |
| TEM-11                   | 978533      | 1288511            | 11441       | 1.65 | 18.691          | 3.4 | 0.4936         | 4.6  | 0.06694        | 3.1 | 0.684       | 417.7           | 12.7 | 407.3           | 15.4 | 349.2            | 75.9  | -19.6   |
| TEM-12                   | 2069561     | 2725154            | 35825       | 2.30 | 18.276          | 2.7 | 0.4966         | 4.8  | 0.06585        | 3.9 | 0.828       | 411.1           | 15.7 | 409.4           | 16.1 | 399.7            | 59.9  | -2.8    |
| TEM-13                   | 1103957     | 1453667            | 9813        | 1.83 | 17.556          | 2.9 | 0.5233         | 5.3  | 0.06666        | 4.4 | 0.831       | 416.0           | 17.6 | 427.3           | 18.4 | 489.0            | 64.7  | 14.9    |
| TEM-14                   | 1852485     | 2439312            | 6866        | 2.16 | 19.010          | 4.7 | 0.4742         | 5.6  | 0.06541        | 3.1 | 0.550       | 408.4           | 12.2 | 394.1           | 18.4 | 310.7            | 106.9 | -31.4   |
| TEM-15                   | 759323      | 999860             | 9851        | 2.98 | 18.132          | 4.0 | 0.5027         | 5.3  | 0.06614        | 3.4 | 0.654       | 412.9           | 13.8 | 413.6           | 17.9 | 417.4            | 89.0  | 1.1     |
| <b>Temora 2 CA Run 2</b> |             |                    |             |      |                 |     |                |      |                |     |             |                 |      |                 |      |                  |       |         |
| TEM 1                    | 725569      | 647664             | 30198       | 2.31 | 17.885          | 4   | 0.5206         | 5.6  | 0.0676         | 4   | 0.707       | 421.5           | 16.1 | 425.6           | 19.5 | 447.9            | 88    | 5.9     |
| TEM 10                   | 951964      | 849751             | 21580       | 3.01 | 18.386          | 3.9 | 0.4984         | 5    | 0.0665         | 3.1 | 0.62        | 415             | 12.5 | 410.6           | 16.9 | 386.2            | 88.2  | -7.5    |
| TEM 11                   | 2024635     | 1807249            | 313297      | 2.19 | 17.863          | 2.9 | 0.5103         | 3.6  | 0.0662         | 2.1 | 0.578       | 412.9           | 8.3  | 418.7           | 12.3 | 450.6            | 64.8  | 8.4     |
| TEM 12                   | 1612690     | 1439535            | 20991       | 2    | 18.122          | 3.1 | 0.4996         | 4.2  | 0.0657         | 2.8 | 0.671       | 410.1           | 11.2 | 411.4           | 14.2 | 418.5            | 69.4  | 2.0     |
| TEM 13                   | 1639769     | 1463706            | 5000        | 3.78 | 19.142          | 8.7 | 0.4798         | 9.2  | 0.0666         | 2.9 | 0.319       | 415.9           | 11.9 | 397.9           | 30.4 | 295              | 199.5 | -41.0   |
| TEM 14                   | 1341374     | 1197350            | 86122       | 3.58 | 18.329          | 3.1 | 0.5051         | 4.7  | 0.0672         | 3.5 | 0.754       | 419.2           | 14.4 | 415.2           | 16   | 393.1            | 69.1  | -6.6    |
| TEM 15                   | 2040577     | 1821479            | 41234       | 3.34 | 18.257          | 2.9 | 0.4991         | 4.1  | 0.0661         | 2.9 | 0.71        | 412.7           | 11.7 | 411.1           | 13.9 | 402              | 65    | -2.7    |
| TEM 16                   | 3385220     | 3021748            | 308778      | 2.27 | 18.245          | 2.5 | 0.5085         | 3.3  | 0.0673         | 2.1 | 0.656       | 420             | 8.7  | 417.5           | 11.2 | 403.5            | 55.1  | -4.1    |
| TEM 17                   | 1054536     | 941310             | 5000        | 4.31 | 19.5            | 9.3 | 0.4763         | 10.1 | 0.0674         | 4   | 0.393       | 420.4           | 16.2 | 395.5           | 33.2 | 252.5            | 214.3 | -66.5   |
| TEM 18                   | 2923349     | 2609468            | 127328      | 1.9  | 18.055          | 2.6 | 0.5089         | 3.6  | 0.0667         | 2.5 | 0.687       | 416.1           | 9.9  | 417.7           | 12.3 | 426.8            | 58    | 2.5     |
| TEM 19                   | 2940852     | 2625092            | 177737      | 2.26 | 17.996          | 3   | 0.5095         | 4.2  | 0.0665         | 2.9 | 0.693       | 415.2           | 11.6 | 418.1           | 14.3 | 434.2            | 66.9  | 4.4     |
| TEM 2                    | 2099968     | 1874494            | 143336      | 2.22 | 18.311          | 3   | 0.5129         | 4.1  | 0.0682         | 2.7 | 0.663       | 425             | 11.1 | 420.4           | 14   | 395.3            | 68.1  | -7.5    |
| TEM 20                   | 694359      | 619805             | 20118       | 2.98 | 18.484          | 5.7 | 0.5104         | 6.7  | 0.0685         | 3.6 | 0.537       | 426.8           | 15   | 418.7           | 23.1 | 374.2            | 127.9 | -14.1   |
| TEM 21                   | 1039081     | 927514             | 28577       | 3.84 | 18.508          | 4.3 | 0.4966         | 5.4  | 0.0667         | 3.2 | 0.594       | 416.1           | 12.9 | 409.4           | 18.1 | 371.3            | 97.3  | -12.1   |

|        |         |         |        |      |        |     |        |      |        |     |       |       |      |       |      |       |       |       |
|--------|---------|---------|--------|------|--------|-----|--------|------|--------|-----|-------|-------|------|-------|------|-------|-------|-------|
| TEM 22 | 2434258 | 2172891 | 37491  | 1.91 | 18.324 | 2.6 | 0.4999 | 3.4  | 0.0665 | 2.2 | 0.636 | 414.8 | 8.7  | 411.6 | 11.5 | 393.7 | 58.9  | -5.4  |
| TEM 23 | 688343  | 614435  | 5000   | 2.56 | 19.717 | 9.8 | 0.4709 | 10.6 | 0.0674 | 4.2 | 0.392 | 420.3 | 17   | 391.8 | 34.6 | 226.9 | 226.4 | -85.2 |
| TEM 24 | 1666478 | 1487548 | 45882  | 1.64 | 18.113 | 2.2 | 0.5122 | 3.3  | 0.0673 | 2.4 | 0.728 | 420   | 9.7  | 419.9 | 11.3 | 419.7 | 50.2  | -0.1  |
| TEM 25 | 556582  | 496822  | 5000   | 3.54 | 18.757 | 9.9 | 0.4881 | 10.9 | 0.0664 | 4.5 | 0.41  | 414.6 | 17.9 | 403.6 | 36.2 | 341.1 | 224.8 | -21.5 |
| TEM 26 | 3179101 | 2837760 | 115805 | 2.31 | 18.301 | 2.7 | 0.5032 | 4    | 0.0668 | 3   | 0.735 | 417   | 12   | 413.9 | 13.7 | 396.5 | 61.4  | -5.2  |
| TEM 27 | 2049969 | 1829863 | 46965  | 3.07 | 18.331 | 3.6 | 0.4922 | 5.8  | 0.0655 | 4.5 | 0.78  | 408.8 | 17.8 | 406.4 | 19.3 | 392.9 | 80.8  | -4.0  |
| TEM 28 | 2539002 | 2266388 | 116446 | 3.53 | 18.101 | 2.7 | 0.501  | 3.3  | 0.0658 | 1.9 | 0.568 | 410.8 | 7.4  | 412.4 | 11.1 | 421.1 | 60.3  | 2.4   |
| TEM 29 | 4182796 | 3733687 | 252685 | 1.7  | 18.194 | 3   | 0.5112 | 3.8  | 0.0675 | 2.3 | 0.61  | 420.9 | 9.4  | 419.2 | 12.9 | 409.8 | 66.7  | -2.7  |
| TEM 3  | 2267813 | 2024317 | 41970  | 3.12 | 18.178 | 3.3 | 0.4973 | 4.3  | 0.0656 | 2.7 | 0.641 | 409.6 | 10.9 | 409.9 | 14.4 | 411.7 | 73.5  | 0.5   |
| TEM 30 | 2462200 | 2197833 | 124650 | 3.49 | 17.929 | 2.8 | 0.4842 | 6.2  | 0.063  | 5.6 | 0.898 | 393.7 | 21.4 | 400.9 | 20.7 | 442.4 | 61.2  | 11.0  |
| TEM 4  | 1426194 | 1273063 | 145740 | 2.07 | 17.951 | 3.3 | 0.5075 | 4.4  | 0.0661 | 3   | 0.676 | 412.7 | 11.9 | 416.8 | 15.1 | 439.7 | 72.5  | 6.1   |
| TEM 5  | 3378767 | 3015987 | 330791 | 2.87 | 18.437 | 2.9 | 0.4972 | 3.8  | 0.0665 | 2.5 | 0.653 | 415.1 | 9.9  | 409.8 | 12.8 | 379.9 | 64.6  | -9.3  |
| TEM 6  | 769797  | 687144  | 22302  | 3.38 | 18.359 | 4.9 | 0.4992 | 6.6  | 0.0665 | 4.3 | 0.657 | 415   | 17.3 | 411.1 | 22.2 | 389.5 | 110.9 | -6.5  |
| TEM 7  | 2021082 | 1804078 | 147241 | 1.84 | 18.315 | 3   | 0.5029 | 4.3  | 0.0668 | 3   | 0.716 | 417   | 12.3 | 413.6 | 14.4 | 394.8 | 66.6  | -5.6  |
| TEM 8  | 2221439 | 1982922 | 33874  | 2.58 | 18.388 | 2.7 | 0.5002 | 4    | 0.0667 | 2.9 | 0.728 | 416.5 | 11.8 | 411.8 | 13.6 | 385.9 | 61.7  | -7.9  |
| TEM 9  | 1886963 | 1684359 | 64312  | 1.93 | 18.12  | 3.4 | 0.5069 | 4.3  | 0.0667 | 2.7 | 0.622 | 415.9 | 10.9 | 416.4 | 14.8 | 418.8 | 76    | 0.7   |

**TABLE S6: R33 LA-ICPMS U-Pb ZIRCON GEOCHRONOLOGY**

| Zircon #                            | Composition |                    |             |      |                 |     |                |      |                |      | Ages        |                 |      |                 |      |                  |       |         |
|-------------------------------------|-------------|--------------------|-------------|------|-----------------|-----|----------------|------|----------------|------|-------------|-----------------|------|-----------------|------|------------------|-------|---------|
|                                     | U (238 cps) | U (norm) (238 cps) | 206Pb/204Pb | U/Th | 206Pb/207Pb (%) | 2σ  | 207Pb/235U (%) | 2σ   | 206Pb/238U (%) | 2σ   | Error Corr. | 206Pb/238U (Ma) | 2σ   | 207Pb/235U (Ma) | 2σ   | 206Pb/207Pb (Ma) | 2σ    | % Disc. |
| <b>R33 no CA Run 1</b>              |             |                    |             |      |                 |     |                |      |                |      |             |                 |      |                 |      |                  |       |         |
| R33-10                              | 2118292.4   | 2423123            | 6686        | 1.64 | 17.950          | 3.1 | 0.5099         | 4.3  | 0.06641        | 3.0  | 0.693       | 414.5           | 11.9 | 418.4           | 14.6 | 439.9            | 68.3  | 5.8     |
| R33-11                              | 4836437.2   | 5532420            | 13907       | 1.47 | 18.333          | 2.0 | 0.4942         | 3.5  | 0.06574        | 2.8  | 0.816       | 410.5           | 11.3 | 407.8           | 11.7 | 392.7            | 45.2  | -4.5    |
| R33-12                              | 888450.81   | 1016302            | 12207       | 1.61 | 17.336          | 6.1 | 0.5192         | 7.3  | 0.06531        | 4.0  | 0.547       | 407.8           | 15.7 | 424.6           | 25.2 | 516.8            | 133.4 | 21.1    |
| R33-13                              | 690944.85   | 790375             | 5544        | 2.02 | 17.046          | 6.6 | 0.5294         | 8.8  | 0.06548        | 5.7  | 0.655       | 408.9           | 22.7 | 431.4           | 30.8 | 553.7            | 144.3 | 26.2    |
| R33-14                              | 1000821.4   | 1144844            | 5476        | 1.73 | 17.498          | 5.3 | 0.5099         | 6.0  | 0.06474        | 2.8  | 0.463       | 404.4           | 10.8 | 418.4           | 20.5 | 496.4            | 116.8 | 18.5    |
| R33-15                              | 1927882.6   | 2205313            | 4403        | 1.08 | 18.132          | 4.8 | 0.5058         | 5.9  | 0.06655        | 3.4  | 0.570       | 415.3           | 13.5 | 415.6           | 20.1 | 417.3            | 107.9 | 0.5     |
| R33-2                               | 1510316.9   | 1727658            | 9048        | 1.67 | 19.038          | 4.1 | 0.4818         | 5.3  | 0.06655        | 3.3  | 0.627       | 415.3           | 13.3 | 399.3           | 17.4 | 307.3            | 93.6  | -35.1   |
| R33-3                               | 5944714.4   | 6800183            | 16589       | 1.57 | 18.140          | 2.5 | 0.5029         | 4.3  | 0.06619        | 3.4  | 0.805       | 413.2           | 13.8 | 413.6           | 14.6 | 416.4            | 56.8  | 0.8     |
| R33-4                               | 1428696.8   | 1634292            | 5856        | 1.65 | 18.608          | 3.4 | 0.5175         | 4.6  | 0.06988        | 3.0  | 0.670       | 435.4           | 12.8 | 423.5           | 15.8 | 359.2            | 76.2  | -21.2   |
| R33-6                               | 2462583.2   | 2816959            | 13597       | 1.56 | 18.723          | 3.2 | 0.5257         | 5.0  | 0.07141        | 3.9  | 0.779       | 444.6           | 16.9 | 428.9           | 17.6 | 345.3            | 71.6  | -28.8   |
| R33-7                               | 15682935    | 17939772           | 161595      | 1.32 | 17.861          | 1.7 | 0.5198         | 2.8  | 0.06737        | 2.2  | 0.782       | 420.3           | 8.9  | 425.0           | 9.7  | 451.0            | 38.7  | 6.8     |
| R33-8                               | 1301140.9   | 1488380            | 10891       | 1.34 | 18.222          | 3.1 | 0.5098         | 4.7  | 0.06741        | 3.5  | 0.749       | 420.5           | 14.3 | 418.3           | 16.1 | 406.2            | 69.4  | -3.5    |
| R33-9                               | 2361156.4   | 2700936            | 12352       | 1.57 | 18.364          | 3.0 | 0.5003         | 4.7  | 0.06666        | 3.5  | 0.760       | 416.0           | 14.3 | 411.9           | 15.8 | 388.8            | 68.2  | -7.0    |
| <b>R33 no CA Run 1 (discordant)</b> |             |                    |             |      |                 |     |                |      |                |      |             |                 |      |                 |      |                  |       |         |
| R33-1                               | 975696.38   | 1116103            | 34248       | 1.54 | 18.621          | 5.6 | 0.5081         | 15.7 | 0.06864        | 14.7 | 0.934       | 428.0           | 60.8 | 417.1           | 53.8 | 357.6            | 126.3 | -19.7   |
| <b>R33 no CA Run 2</b>              |             |                    |             |      |                 |     |                |      |                |      |             |                 |      |                 |      |                  |       |         |
| R33 1                               | 3465645     | 3260555            | 742378      | 1.1  | 18.348          | 2.8 | 0.5049         | 3.7  | 0.06722        | 2.4  | 0.656       | 419.4           | 9.9  | 415             | 12.7 | 390.8            | 63.1  | -7.3    |
| R33 10                              | 2638856     | 2482694            | 86117       | 0.85 | 18.252          | 2.6 | 0.5206         | 4.2  | 0.06895        | 3.3  | 0.79        | 429.8           | 13.7 | 425.6           | 14.5 | 402.6            | 57.2  | -6.8    |
| R33 11                              | 842104      | 792270             | 56454       | 1.5  | 17.775          | 3.7 | 0.5122         | 5.3  | 0.06606        | 3.8  | 0.717       | 412.4           | 15.1 | 419.9           | 18.1 | 461.5            | 81.2  | 10.6    |
| R33 12                              | 1719318     | 1617572            | 28252       | 1.38 | 18.416          | 3.7 | 0.5006         | 4.4  | 0.06689        | 2.4  | 0.545       | 417.4           | 9.7  | 412.1           | 14.9 | 382.5            | 82.9  | -9.1    |
| R33 13                              | 2757105     | 2593945            | 238324      | 1.66 | 18.118          | 2.8 | 0.5187         | 3.7  | 0.06819        | 2.5  | 0.667       | 425.2           | 10.2 | 424.3           | 12.9 | 419.1            | 62    | -1.5    |
| R33 14                              | 1801619     | 1695003            | 155027      | 1.36 | 18.83           | 2.9 | 0.5037         | 4.2  | 0.06882        | 3    | 0.714       | 429             | 12.4 | 414.2           | 14.2 | 332.3            | 66.5  | -29.1   |
| R33 15                              | 1375138     | 1293760            | 22168       | 1.38 | 18.207          | 3.2 | 0.5144         | 4.5  | 0.06796        | 3.2  | 0.712       | 423.9           | 13.2 | 421.4           | 15.7 | 408.1            | 71.3  | -3.9    |
| R33 16                              | 1367286     | 1286373            | 22031       | 0.87 | 17.015          | 4.8 | 0.5637         | 6.5  | 0.06959        | 4.3  | 0.662       | 433.7           | 17.9 | 453.9           | 23.6 | 557.7            | 105.6 | 22.2    |
| R33 17                              | 2293224     | 2157515            | 73853       | 1.62 | 18.092          | 2.7 | 0.5173         | 3.4  | 0.06791        | 2    | 0.603       | 423.5           | 8.3  | 423.3           | 11.6 | 422.2            | 59.7  | -0.3    |
| R33 18                              | 1183026     | 1113017            | 20741       | 1.36 | 18.266          | 3.5 | 0.4946         | 5    | 0.06555        | 3.6  | 0.721       | 409.3           | 14.3 | 408             | 16.8 | 400.8            | 77.4  | -2.1    |
| R33 19                              | 1256715     | 1182345            | 154227      | 1.61 | 17.832          | 3.7 | 0.519          | 4.8  | 0.06716        | 3.1  | 0.645       | 419             | 12.6 | 424.5           | 16.6 | 454.5            | 81.4  | 7.8     |
| R33 2                               | 1795982     | 1689699            | 55363       | 2.63 | 18.383          | 2.8 | 0.4946         | 4.1  | 0.06597        | 3.1  | 0.738       | 411.8           | 12.2 | 408             | 13.9 | 386.5            | 62.8  | -6.5    |
| R33 20                              | 1123833     | 1057327            | 1406710     | 1.89 | 17.879          | 2.9 | 0.5151         | 4.1  | 0.06683        | 3    | 0.721       | 417             | 12.1 | 421.9           | 14.3 | 448.6            | 63.8  | 7.0     |
| R33 21                              | 3376234     | 3176435            | 667189      | 1.1  | 18.052          | 2.6 | 0.5026         | 3.9  | 0.06583        | 2.9  | 0.747       | 411             | 11.7 | 413.4           | 13.4 | 427.2            | 58.3  | 3.8     |
| R33 22                              | 2507716     | 2359314            | 63222       | 1.07 | 18.223          | 2.7 | 0.5208         | 4.1  | 0.06886        | 3.1  | 0.754       | 429.3           | 13   | 425.7           | 14.4 | 406.2            | 61    | -5.7    |
| R33 23                              | 1303213     | 1226091            | 32367       | 1.52 | 18.251          | 3.1 | 0.496          | 4.2  | 0.06569        | 2.9  | 0.68        | 410.1           | 11.4 | 409             | 14.2 | 402.7            | 69.1  | -1.8    |
| R33 24                              | 1611094     | 1515753            | 1102756     | 1.42 | 18.325          | 2.9 | 0.5023         | 4.1  | 0.06679        | 3    | 0.723       | 416.8           | 12.1 | 413.2           | 14.1 | 393.6            | 64.2  | -5.9    |
| R33 25                              | 5347924     | 5031444            | 938550      | 1.7  | 18.253          | 2.5 | 0.515          | 3.7  | 0.06821        | 2.7  | 0.739       | 425.3           | 11.1 | 421.8           | 12.6 | 402.4            | 55.2  | -5.7    |
| R33 26                              | 5887843     | 5539412            | 301653      | 1.53 | 17.988          | 2.2 | 0.5105         | 3.5  | 0.06664        | 2.7  | 0.774       | 415.9           | 11.1 | 418.8           | 12.2 | 435.1            | 50    | 4.4     |
| R33 27                              | 7177655     | 6752895            | 262288      | 1.42 | 18.089          | 2.2 | 0.5301         | 3    | 0.06958        | 2.1  | 0.689       | 433.6           | 8.7  | 431.9           | 10.6 | 422.6            | 48.9  | -2.6    |
| R33 28                              | 792250      | 745366             | 5000        | 1.62 | 19.02           | 9.3 | 0.4871         | 10   | 0.06722        | 3.8  | 0.382       | 419.4           | 15.6 | 402.9           | 33.3 | 309.5            | 210.9 | -35.5   |
| R33 29                              | 3443076     | 3239321            | 50470       | 1.66 | 18.175          | 2.6 | 0.5107         | 3.8  | 0.06735        | 2.8  | 0.737       | 420.2           | 11.5 | 418.9           | 13.1 | 412.1            | 57.8  | -2.0    |



|        |         |         |        |      |        |      |        |      |         |     |       |       |      |       |      |       |       |       |
|--------|---------|---------|--------|------|--------|------|--------|------|---------|-----|-------|-------|------|-------|------|-------|-------|-------|
| R33 3  | 2349642 | 2210595 | 201198 | 1.11 | 18.212 | 2.8  | 0.5093 | 3.9  | 0.0673  | 2.6 | 0.681 | 419.9 | 10.7 | 418   | 13.3 | 407.5 | 63.5  | -3.0  |
| R33 30 | 638602  | 600811  | 5000   | 2.16 | 19.572 | 10.4 | 0.4689 | 11.4 | 0.06659 | 4.6 | 0.401 | 415.6 | 18.4 | 390.4 | 36.9 | 244   | 240.7 | -70.3 |
| R33 4  | 1549179 | 1457502 | 230033 | 1.59 | 18.2   | 3.3  | 0.5122 | 5    | 0.06764 | 3.7 | 0.741 | 422   | 15   | 419.9 | 17.1 | 408.9 | 74.5  | -3.2  |
| R33 5  | 3278992 | 3084948 | 47163  | 2.51 | 17.934 | 2.4  | 0.5082 | 3.8  | 0.06613 | 3   | 0.776 | 412.8 | 11.9 | 417.2 | 13.1 | 441.8 | 53.7  | 6.6   |
| R33 6  | 926168  | 871359  | 67169  | 2.37 | 18.127 | 3.6  | 0.5048 | 4.7  | 0.06639 | 3.1 | 0.657 | 414.4 | 12.5 | 414.9 | 16.1 | 417.9 | 79.9  | 0.8   |
| R33 7  | 2352020 | 2212832 | 157760 | 1.72 | 18.105 | 2.6  | 0.5053 | 4.1  | 0.06638 | 3.2 | 0.783 | 414.3 | 13   | 415.3 | 14.1 | 420.7 | 57.5  | 1.5   |
| R33 8  | 2158090 | 2030378 | 174952 | 1.24 | 17.784 | 3    | 0.504  | 3.9  | 0.06503 | 2.5 | 0.643 | 406.2 | 9.8  | 414.4 | 13.2 | 460.5 | 65.9  | 11.8  |
| R33 9  | 4158242 | 3912165 | 114345 | 0.95 | 18.333 | 2.3  | 0.509  | 3.5  | 0.06771 | 2.6 | 0.74  | 422.3 | 10.5 | 417.8 | 11.9 | 392.7 | 52.5  | -7.5  |

**Composition**

**Ages**

| Zircon                           | U         | U (norm)  | 206Pb/ | U/Th | 206Pb/ | 2σ   | 207Pb/ | 2σ   | 206Pb/  | 2σ   | Error | 206Pb/ | 2σ   | 207Pb/ | 2σ   | 206Pb/ | 2σ    | %      |
|----------------------------------|-----------|-----------|--------|------|--------|------|--------|------|---------|------|-------|--------|------|--------|------|--------|-------|--------|
| #                                | (238 cps) | (238 cps) | 204Pb  |      | 207Pb  | (%)  | 235U   | (%)  | 238U    | (%)  | Corr. | 238U   | (Ma) | 235U   | (Ma) | 207Pb  | (Ma)  | Disc.  |
| <b>R33 CA Run 1</b>              |           |           |        |      |        |      |        |      |         |      |       |        |      |        |      |        |       |        |
| R33-1                            | 861433    | 1134316   | 8053   | 1.33 | 18.230 | 5.2  | 0.5105 | 6.5  | 0.06753 | 3.9  | 0.598 | 421.2  | 15.8 | 418.8  | 22.2 | 405.3  | 116.1 | -3.9   |
| R33-2                            | 2193276   | 2888060   | 119350 | 1.58 | 17.777 | 3.8  | 0.5224 | 4.5  | 0.06739 | 2.5  | 0.544 | 420.4  | 10.0 | 426.8  | 15.7 | 461.4  | 83.8  | 8.9    |
| R33-3                            | 1004810   | 1323113   | 7029   | 1.26 | 18.836 | 5.0  | 0.4870 | 5.9  | 0.06656 | 3.1  | 0.526 | 415.4  | 12.4 | 402.9  | 19.5 | 331.6  | 113.3 | -25.3  |
| R33-5                            | 896378    | 1180331   | 15002  | 1.44 | 18.436 | 3.4  | 0.5054 | 4.5  | 0.06761 | 3.0  | 0.657 | 421.7  | 12.2 | 415.4  | 15.5 | 380.1  | 76.8  | -10.9  |
| R33-6                            | 2041635   | 2688381   | 6938   | 1.86 | 18.680 | 3.0  | 0.4979 | 4.0  | 0.06748 | 2.6  | 0.658 | 421.0  | 10.6 | 410.3  | 13.4 | 350.5  | 67.7  | -20.1  |
| R33-7                            | 1209925   | 1593203   | 15063  | 1.24 | 18.652 | 2.7  | 0.4983 | 3.8  | 0.06744 | 2.7  | 0.705 | 420.7  | 11.0 | 410.6  | 12.9 | 353.8  | 61.3  | -18.9  |
| R33-8                            | 6552394   | 8628054   | 36566  | 0.94 | 17.933 | 1.7  | 0.5052 | 4.0  | 0.06574 | 3.6  | 0.908 | 410.4  | 14.4 | 415.2  | 13.5 | 441.9  | 37.0  | 7.1    |
| R33-9                            | 930595    | 1225388   | 534136 | 2.06 | 17.459 | 7.8  | 0.5458 | 12.5 | 0.06914 | 9.7  | 0.777 | 431.0  | 40.4 | 442.2  | 44.7 | 501.2  | 172.8 | 14.0   |
| R33-10                           | 1775319   | 2337702   | 13328  | 2.59 | 18.585 | 2.6  | 0.4923 | 4.0  | 0.06638 | 3.0  | 0.749 | 414.3  | 12.0 | 406.4  | 13.4 | 362.0  | 59.6  | -14.4  |
| R33-11                           | 478717    | 630365    | 6625   | 1.91 | 12.979 | 12.0 | 0.7197 | 15.7 | 0.06777 | 10.1 | 0.647 | 422.7  | 41.5 | 550.5  | 66.6 | 1121.6 | 238.6 | 62.3   |
| R33-12                           | 931024    | 1225953   | 5552   | 1.33 | 17.549 | 6.6  | 0.5338 | 7.6  | 0.06797 | 3.7  | 0.488 | 423.9  | 15.1 | 434.4  | 26.7 | 490.0  | 145.7 | 13.5   |
| R33-14                           | 919347    | 1210577   | 10606  | 1.27 | 18.387 | 3.6  | 0.4968 | 4.8  | 0.06628 | 3.1  | 0.658 | 413.7  | 12.6 | 409.5  | 16.1 | 386.1  | 80.6  | -7.1   |
| R33-13                           | 995253    | 1310528   | 7356   | 1.32 | 19.053 | 3.8  | 0.4715 | 5.3  | 0.06518 | 3.7  | 0.701 | 407.0  | 14.7 | 392.2  | 17.3 | 305.6  | 86.5  | -33.2  |
| R33-15                           | 3122164   | 4111199   | 117093 | 1.47 | 17.954 | 2.7  | 0.5189 | 4.3  | 0.06760 | 3.4  | 0.781 | 421.7  | 13.9 | 424.4  | 15.1 | 439.3  | 60.5  | 4.0    |
| <b>R33 CA Run 1 (discordant)</b> |           |           |        |      |        |      |        |      |         |      |       |        |      |        |      |        |       |        |
| R33-4                            | 1171872   | 1543096   | 4692   | 1.45 | 20.020 | 6.0  | 0.4849 | 16.6 | 0.07043 | 15.5 | 0.933 | 438.8  | 65.8 | 401.4  | 55.2 | 191.7  | 139.5 | -128.9 |
| <b>R33 CA Run 2</b>              |           |           |        |      |        |      |        |      |         |      |       |        |      |        |      |        |       |        |
| R33 1                            | 2774273   | 2476398   | 334247 | 0.98 | 18.358 | 2.9  | 0.5046 | 3.7  | 0.06721 | 2.2  | 0.596 | 419.3  | 8.9  | 414.8  | 12.5 | 389.6  | 66.2  | -7.6   |
| R33 10                           | 1015333   | 906316    | 163116 | 2.23 | 18.14  | 3.9  | 0.5186 | 5    | 0.06826 | 3.1  | 0.618 | 425.7  | 12.7 | 424.2  | 17.3 | 416.4  | 87.6  | -2.2   |
| R33 11                           | 1533174   | 1368556   | 70364  | 1.77 | 18.5   | 3    | 0.5047 | 4    | 0.06775 | 2.6  | 0.656 | 422.6  | 10.8 | 414.9  | 13.7 | 372.3  | 68.1  | -13.5  |
| R33 12                           | 1158069   | 1033727   | 5000   | 1.92 | 19.316 | 9.2  | 0.4826 | 9.5  | 0.06764 | 2.3  | 0.239 | 421.9  | 9.3  | 399.8  | 31.3 | 274.2  | 211.1 | -53.9  |
| R33 13                           | 1189638   | 1061906   | 30508  | 1.5  | 18.255 | 3.7  | 0.5217 | 4.3  | 0.06911 | 2.1  | 0.482 | 430.8  | 8.6  | 426.3  | 14.9 | 402.2  | 84    | -7.1   |
| R33 14                           | 1657131   | 1479204   | 55799  | 1.24 | 18.075 | 3.1  | 0.5141 | 4.3  | 0.06742 | 2.9  | 0.675 | 420.6  | 11.7 | 421.2  | 14.7 | 424.4  | 70.3  | 0.9    |
| R33 15                           | 3228683   | 2882018   | 82024  | 0.91 | 18.107 | 2.6  | 0.5229 | 3.4  | 0.0687  | 2.2  | 0.639 | 428.3  | 8.9  | 427.1  | 11.8 | 420.5  | 58    | -1.9   |
| R33 16                           | 897706    | 801319    | 143428 | 2.21 | 18.117 | 4.5  | 0.5144 | 5.1  | 0.06762 | 2.3  | 0.456 | 421.8  | 9.5  | 421.4  | 17.6 | 419.1  | 101.3 | -0.6   |
| R33 17                           | 2207184   | 1970198   | 40305  | 1.02 | 18.284 | 2.6  | 0.5188 | 3.5  | 0.06883 | 2.4  | 0.674 | 429.1  | 9.8  | 424.4  | 12.1 | 398.7  | 57.7  | -7.6   |
| R33 18                           | 2150675   | 1919756   | 144509 | 1.11 | 18.242 | 2.8  | 0.509  | 4.3  | 0.06737 | 3.2  | 0.756 | 420.3  | 13.1 | 417.7  | 14.6 | 403.8  | 62.4  | -4.1   |
| R33 19                           | 1643554   | 1467085   | 236345 | 1.41 | 18.368 | 2.4  | 0.5138 | 3.1  | 0.06848 | 1.9  | 0.617 | 427    | 7.9  | 421    | 10.6 | 388.3  | 54.5  | -10.0  |
| R33 2                            | 806032    | 719488    | 75251  | 1.71 | 18.2   | 4.2  | 0.5171 | 5.5  | 0.06829 | 3.5  | 0.636 | 425.8  | 14.3 | 423.2  | 18.9 | 409    | 94.2  | -4.1   |
| R33 20                           | 646775    | 577331    | 21868  | 1.65 | 18.348 | 4.7  | 0.5099 | 5.9  | 0.06789 | 3.6  | 0.604 | 423.4  | 14.6 | 418.4  | 20.2 | 390.8  | 105.5 | -8.3   |
| R33 21                           | 1140204   | 1017780   | 100004 | 1.81 | 17.994 | 4.1  | 0.5157 | 5    | 0.06733 | 2.9  | 0.572 | 420    | 11.7 | 422.2  | 17.3 | 434.4  | 91.7  | 3.3    |

|        |         |         |         |      |        |     |        |     |         |     |       |       |      |       |      |       |      |       |
|--------|---------|---------|---------|------|--------|-----|--------|-----|---------|-----|-------|-------|------|-------|------|-------|------|-------|
| R33 22 | 2037623 | 1818843 | 705886  | 1.42 | 18.037 | 2.9 | 0.5217 | 4   | 0.06828 | 2.8 | 0.685 | 425.8 | 11.4 | 426.3 | 14.1 | 429   | 65.6 | 0.7   |
| R33 23 | 1621837 | 1447700 | 22594   | 1.26 | 18.414 | 3.7 | 0.5097 | 4.8 | 0.06809 | 3.1 | 0.648 | 424.7 | 12.8 | 418.2 | 16.5 | 382.8 | 82.3 | -10.9 |
| R33 24 | 990892  | 884500  | 33205   | 1.71 | 18.595 | 4   | 0.5014 | 4.9 | 0.06765 | 2.9 | 0.595 | 422   | 12   | 412.6 | 16.7 | 360.7 | 89.4 | -17.0 |
| R33 25 | 2506436 | 2237319 | 53527   | 1.28 | 18.34  | 2.8 | 0.5116 | 3.5 | 0.06808 | 2.1 | 0.59  | 424.6 | 8.5  | 419.5 | 12.1 | 391.7 | 63.6 | -8.4  |
| R33 26 | 2452063 | 2188784 | 75011   | 1.3  | 18.1   | 2.7 | 0.522  | 4   | 0.06855 | 2.9 | 0.741 | 427.4 | 12.1 | 426.5 | 13.8 | 421.3 | 59.2 | -1.4  |
| R33 27 | 1653807 | 1476237 | 44741   | 1.41 | 18.344 | 1.9 | 0.5064 | 3.3 | 0.0674  | 2.7 | 0.825 | 420.5 | 11.2 | 416   | 11.4 | 391.3 | 42.2 | -7.5  |
| R33 28 | 3526238 | 3147624 | 210788  | 1.55 | 18.364 | 2   | 0.5167 | 3.3 | 0.06886 | 2.6 | 0.802 | 429.3 | 11   | 423   | 11.4 | 388.8 | 44.2 | -10.4 |
| R33 29 | 4645988 | 4147146 | 160008  | 1.58 | 18.056 | 2.5 | 0.5132 | 3.6 | 0.06724 | 2.6 | 0.726 | 419.5 | 10.6 | 420.6 | 12.4 | 426.7 | 55.2 | 1.7   |
| R33 3  | 1692433 | 1510716 | 43002   | 1.81 | 18.104 | 3   | 0.5188 | 4.6 | 0.06815 | 3.5 | 0.761 | 425   | 14.4 | 424.4 | 15.9 | 420.8 | 66.5 | -1.0  |
| R33 30 | 1292666 | 1153872 | 73164   | 1.23 | 18.544 | 2.4 | 0.5116 | 4.1 | 0.06883 | 3.4 | 0.817 | 429.1 | 14   | 419.5 | 14.1 | 367   | 53.4 | -16.9 |
| R33 4  | 4784944 | 4271183 | 298711  | 1.71 | 17.93  | 2.4 | 0.5172 | 3.4 | 0.06729 | 2.4 | 0.71  | 419.8 | 9.7  | 423.3 | 11.7 | 442.3 | 52.7 | 5.1   |
| R33 5  | 651494  | 581543  | 56058   | 1.58 | 17.818 | 4.5 | 0.5224 | 5.9 | 0.06754 | 3.8 | 0.652 | 421.3 | 15.6 | 426.7 | 20.5 | 456.2 | 99.1 | 7.7   |
| R33 7  | 2474556 | 2208862 | 1141650 | 1.68 | 18.27  | 3   | 0.5156 | 3.8 | 0.06836 | 2.4 | 0.63  | 426.3 | 9.9  | 422.2 | 13.1 | 400.3 | 66.1 | -6.5  |
| R33 8  | 1109806 | 990646  | 45687   | 1.3  | 18.238 | 3.6 | 0.5107 | 4.7 | 0.06758 | 3   | 0.641 | 421.6 | 12.2 | 418.9 | 16   | 404.3 | 80   | -4.3  |
| R33 9  | 4527634 | 4041500 | 289811  | 1.7  | 18     | 1.9 | 0.5136 | 3.2 | 0.06707 | 2.6 | 0.818 | 418.5 | 10.7 | 420.8 | 11.1 | 433.7 | 41.2 | 3.5   |

**R33 CA Run 2 (discordant)**

|       |         |        |        |      |       |     |        |     |         |     |      |        |      |      |    |      |      |     |
|-------|---------|--------|--------|------|-------|-----|--------|-----|---------|-----|------|--------|------|------|----|------|------|-----|
| R33 6 | 1085882 | 969290 | 375529 | 2.12 | 6.231 | 1.8 | 10.048 | 3.8 | 0.45425 | 3.3 | 0.88 | 2414.1 | 67.2 | 2439 | 35 | 2460 | 30.4 | 1.9 |
|-------|---------|--------|--------|------|-------|-----|--------|-----|---------|-----|------|--------|------|------|----|------|------|-----|

**TABLE S7: SLM LA-ICPMS U-Pb ZIRCON GEOCHRONOLOGY**

| Zircon #                            | Composition |                    |             |      |                 |     |                |      |                |      | Ages        |                 |       |                 |      |                  |      |         |
|-------------------------------------|-------------|--------------------|-------------|------|-----------------|-----|----------------|------|----------------|------|-------------|-----------------|-------|-----------------|------|------------------|------|---------|
|                                     | U (238 cps) | U (norm) (238 cps) | 206Pb/204Pb | U/Th | 206Pb/207Pb (%) | 2σ  | 207Pb/235U (%) | 2σ   | 206Pb/238U (%) | 2σ   | Error Corr. | 206Pb/238U (Ma) | 2σ    | 207Pb/235U (Ma) | 2σ   | 206Pb/207Pb (Ma) | 2σ   | % Disc. |
| <b>SLM no CA Run 1</b>              |             |                    |             |      |                 |     |                |      |                |      |             |                 |       |                 |      |                  |      |         |
| SLM-1                               | 1812595     | 2073434            | 13334       | 6.00 | 16.587          | 3.3 | 0.7247         | 4.8  | 0.08722        | 3.5  | 0.729       | 539.1           | 18.0  | 553.5           | 20.4 | 613.0            | 70.6 | 12.1    |
| SLM-10                              | 3826390     | 4377023            | 32288       | 3.45 | 17.286          | 1.6 | 0.7157         | 3.0  | 0.08976        | 2.6  | 0.859       | 554.1           | 13.9  | 548.1           | 12.9 | 523.2            | 34.2 | -5.9    |
| SLM-11                              | 3255875     | 3724408            | 58062       | 6.51 | 16.976          | 1.6 | 0.7163         | 3.3  | 0.08824        | 2.9  | 0.870       | 545.1           | 15.0  | 548.5           | 13.9 | 562.7            | 35.3 | 3.1     |
| SLM-12                              | 1651680     | 1889363            | 14747       | 6.28 | 17.134          | 2.6 | 0.7671         | 3.6  | 0.09536        | 2.5  | 0.682       | 587.2           | 13.8  | 578.1           | 15.9 | 542.5            | 57.5 | -8.2    |
| SLM-13                              | 3074887     | 3517375            | 31095       | 4.26 | 17.005          | 2.2 | 0.7380         | 4.2  | 0.09105        | 3.6  | 0.846       | 561.8           | 19.2  | 561.2           | 18.2 | 559.0            | 48.9 | -0.5    |
| SLM-14                              | 1547649     | 1770362            | 72348       | 5.34 | 16.801          | 2.3 | 0.7644         | 4.1  | 0.09319        | 3.4  | 0.828       | 574.4           | 18.9  | 576.5           | 18.3 | 585.2            | 50.4 | 1.9     |
| SLM-15                              | 3032481     | 3468868            | 24512       | 6.31 | 17.106          | 2.0 | 0.7155         | 3.3  | 0.08880        | 2.7  | 0.807       | 548.5           | 14.0  | 548.0           | 14.0 | 546.1            | 42.7 | -0.4    |
| SLM-2                               | 1150904     | 1316524            | 18639       | 7.18 | 17.029          | 2.8 | 0.7519         | 4.5  | 0.09291        | 3.4  | 0.769       | 572.7           | 18.8  | 569.3           | 19.4 | 555.9            | 62.1 | -3.0    |
| SLM-3                               | 1799345     | 2058278            | 4613        | 6.20 | 16.519          | 3.1 | 0.7381         | 4.1  | 0.08847        | 2.8  | 0.666       | 546.5           | 14.4  | 561.3           | 17.9 | 621.9            | 66.7 | 12.1    |
| SLM-4                               | 5058020     | 5785890            | 81163       | 5.13 | 17.106          | 1.4 | 0.7370         | 3.0  | 0.09147        | 2.6  | 0.882       | 564.2           | 14.2  | 560.6           | 12.8 | 546.1            | 30.6 | -3.3    |
| SLM-5                               | 6798007     | 7776267            | 56723       | 5.37 | 17.221          | 1.8 | 0.7204         | 3.5  | 0.09002        | 3.0  | 0.850       | 555.7           | 15.8  | 550.9           | 14.9 | 531.4            | 40.4 | -4.6    |
| SLM-6                               | 3439342     | 3934277            | 207689      | 6.68 | 16.852          | 2.7 | 0.7197         | 4.8  | 0.08801        | 3.9  | 0.819       | 543.7           | 20.4  | 550.5           | 20.3 | 578.6            | 59.4 | 6.0     |
| SLM-7                               | 1642686     | 1879075            | 10636       | 6.23 | 16.646          | 3.9 | 0.7204         | 5.3  | 0.08701        | 3.6  | 0.677       | 537.8           | 18.6  | 550.9           | 22.7 | 605.3            | 84.8 | 11.1    |
| SLM-9                               | 3735277     | 4272799            | 65139       | 5.98 | 17.036          | 1.6 | 0.7124         | 2.8  | 0.08806        | 2.3  | 0.820       | 544.1           | 11.9  | 546.2           | 11.8 | 555.0            | 34.8 | 2.0     |
| <b>SLM no CA Run 1 (discordant)</b> |             |                    |             |      |                 |     |                |      |                |      |             |                 |       |                 |      |                  |      |         |
| SLM-8                               | 4207205     | 4812639            | 27718       | 5.69 | 18.208          | 4.3 | 0.7038         | 20.2 | 0.09298        | 19.7 | 0.977       | 573.1           | 108.2 | 541.0           | 84.8 | 408.0            | 96.5 | -40.5   |
| <b>SLM no CA Run 2</b>              |             |                    |             |      |                 |     |                |      |                |      |             |                 |       |                 |      |                  |      |         |
| SLM 1                               | 4276988     | 4023884            | 82685       | 3.89 | 16.967          | 2.4 | 0.7261         | 3.2  | 0.08939        | 2    | 0.647       | 551.9           | 10.8  | 554.3           | 13.5 | 563.9            | 52.5 | 2.1     |
| SLM 10                              | 4109318     | 3866136            | 105401      | 4.03 | 17.014          | 2.6 | 0.7293         | 3.5  | 0.09004        | 2.4  | 0.673       | 555.8           | 12.5  | 556.2           | 15   | 557.9            | 56.4 | 0.4     |
| SLM 11                              | 2192934     | 2063160            | 73916       | 6.51 | 17.083          | 2.8 | 0.7176         | 3.6  | 0.08895        | 2.3  | 0.64        | 549.3           | 12.3  | 549.2           | 15.4 | 548.9            | 61   | -0.1    |
| SLM 12                              | 4005467     | 3768431            | 344129      | 6.86 | 17.128          | 2.1 | 0.7248         | 3.5  | 0.09007        | 2.7  | 0.788       | 556             | 14.6  | 553.5           | 14.9 | 543.3            | 46.9 | -2.3    |
| SLM 13                              | 6227156     | 5858645            | 253077      | 5.58 | 16.912          | 2.2 | 0.7249         | 3.2  | 0.08896        | 2.4  | 0.74        | 549.4           | 12.5  | 553.6           | 13.7 | 570.9            | 46.9 | 3.8     |
| SLM 14                              | 3789464     | 3565211            | 301471      | 6.96 | 17.202          | 2.3 | 0.7062         | 3.6  | 0.08814        | 2.8  | 0.782       | 544.5           | 14.8  | 542.5           | 15.2 | 533.9            | 49.4 | -2.0    |
| SLM 15                              | 4104549     | 3861650            | 118662      | 4.03 | 17.133          | 2.5 | 0.734          | 4.2  | 0.09125        | 3.3  | 0.796       | 563             | 17.9  | 558.9           | 17.9 | 542.5            | 55.3 | -3.8    |
| SLM 16                              | 2105162     | 1980583            | 52805       | 7.15 | 17.255          | 2.9 | 0.6972         | 3.7  | 0.08729        | 2.4  | 0.641       | 539.5           | 12.4  | 537.1           | 15.6 | 527.1            | 63.1 | -2.4    |
| SLM 17                              | 7869435     | 7403737            | 424775      | 5.53 | 17.054          | 2   | 0.7378         | 3.1  | 0.0913         | 2.4  | 0.777       | 563.2           | 13    | 561.1           | 13.4 | 552.6            | 42.6 | -1.9    |
| SLM 18                              | 3849962     | 3622129            | 101331      | 6.81 | 16.978          | 2.2 | 0.7228         | 4    | 0.08904        | 3.3  | 0.837       | 549.9           | 17.6  | 552.3           | 17   | 562.4            | 47.7 | 2.2     |
| SLM 19                              | 1990377     | 1872590            | 65655       | 6.69 | 17.117          | 2.4 | 0.7113         | 3.9  | 0.08834        | 3.1  | 0.787       | 545.7           | 16    | 545.5           | 16.4 | 544.6            | 52.4 | -0.2    |
| SLM 2                               | 6354776     | 5978713            | 331675      | 5.71 | 17.122          | 1.6 | 0.7222         | 3    | 0.08973        | 2.5  | 0.834       | 553.9           | 13.1  | 552             | 12.6 | 544              | 35.8 | -1.8    |
| SLM 20                              | 4043907     | 3804596            | 639867      | 3.93 | 16.974          | 2.2 | 0.7424         | 3.2  | 0.09143        | 2.4  | 0.742       | 564             | 13    | 563.8           | 14   | 562.9            | 47.3 | -0.2    |
| SLM 21                              | 4928632     | 4636965            | 80490       | 6.12 | 17.279          | 2   | 0.704          | 3.6  | 0.08826        | 3    | 0.83        | 545.2           | 15.5  | 541.2           | 15   | 524              | 43.6 | -4.0    |
| SLM 22                              | 1465841     | 1379095            | 88185       | 6.64 | 16.881          | 2.7 | 0.7405         | 4.3  | 0.0907         | 3.3  | 0.772       | 559.7           | 17.7  | 562.7           | 18.5 | 574.9            | 59.2 | 2.6     |
| SLM 23                              | 4906115     | 4615781            | 646582      | 6.12 | 17.382          | 2.1 | 0.7025         | 3.3  | 0.0886         | 2.6  | 0.782       | 547.2           | 13.7  | 540.3           | 14   | 511              | 45.7 | -7.1    |
| SLM 24                              | 1409143     | 1325753            | 103566      | 6.38 | 17.001          | 3.1 | 0.7456         | 4.5  | 0.09198        | 3.3  | 0.733       | 567.2           | 17.8  | 565.7           | 19.5 | 559.4            | 66.5 | -1.4    |
| SLM 25                              | 4004008     | 3767058            | 150869      | 7.02 | 16.982          | 2.1 | 0.7125         | 3.4  | 0.0878         | 2.6  | 0.779       | 542.5           | 13.7  | 546.2           | 14.3 | 561.8            | 46.4 | 3.4     |
| SLM 26                              | 2252532     | 2119231            | 338877      | 6.52 | 17.091          | 2.9 | 0.7274         | 5.5  | 0.0902         | 4.7  | 0.85        | 556.7           | 24.9  | 555             | 23.5 | 548              | 63.3 | -1.6    |
| SLM 27                              | 4123544     | 3879521            | 163579      | 3.81 | 16.829          | 2   | 0.7392         | 3.2  | 0.09026        | 2.5  | 0.783       | 557.1           | 13.4  | 561.9           | 13.8 | 581.6            | 43.2 | 4.2     |
| SLM 28                              | 4208277     | 3959239            | 10806294    | 3.91 | 16.908          | 2.1 | 0.7429         | 3.4  | 0.09115        | 2.6  | 0.779       | 562.3           | 14.1  | 564.1           | 14.5 | 571.4            | 45.7 | 1.6     |

|        |         |         |          |      |        |     |        |     |         |     |       |       |      |       |      |       |      |      |
|--------|---------|---------|----------|------|--------|-----|--------|-----|---------|-----|-------|-------|------|-------|------|-------|------|------|
| SLM 29 | 6372822 | 5995691 | 13233870 | 5.68 | 16.896 | 2.3 | 0.7366 | 3.6 | 0.09031 | 2.7 | 0.76  | 557.4 | 14.4 | 560.4 | 15.3 | 572.9 | 50.2 | 2.7  |
| SLM 3  | 6575696 | 6186559 | 141347   | 5.57 | 17.086 | 2.2 | 0.7244 | 3.2 | 0.08981 | 2.3 | 0.719 | 554.4 | 12.3 | 553.3 | 13.8 | 548.6 | 49   | -1.1 |
| SLM 30 | 5340454 | 5024416 | 128673   | 5.71 | 17.067 | 2.2 | 0.7319 | 3.8 | 0.09064 | 3.1 | 0.816 | 559.3 | 16.6 | 557.7 | 16.3 | 551.1 | 47.9 | -1.5 |
| SLM 4  | 6378252 | 6000799 | 293124   | 5.97 | 17.088 | 2.5 | 0.7224 | 3.5 | 0.08957 | 2.4 | 0.687 | 553   | 12.6 | 552.1 | 14.7 | 548.4 | 54.9 | -0.8 |
| SLM 5  | 3684504 | 3466462 | 268686   | 4.64 | 17.104 | 1.8 | 0.7194 | 3   | 0.08928 | 2.4 | 0.795 | 551.3 | 12.4 | 550.3 | 12.6 | 546.2 | 39.2 | -0.9 |
| SLM 6  | 4467813 | 4203416 | 133547   | 3.8  | 17.069 | 2.6 | 0.726  | 3.5 | 0.08991 | 2.3 | 0.656 | 555   | 12.2 | 554.2 | 15   | 550.8 | 57.7 | -0.8 |
| SLM 7  | 3987096 | 3751147 | 258430   | 4.17 | 17.249 | 2.2 | 0.7224 | 3.1 | 0.09042 | 2.2 | 0.703 | 558   | 11.7 | 552.1 | 13.3 | 527.8 | 48.7 | -5.7 |
| SLM 8  | 2293087 | 2157387 | 481965   | 6.76 | 17.08  | 3.3 | 0.7347 | 4.4 | 0.09105 | 2.9 | 0.657 | 561.8 | 15.4 | 559.3 | 18.8 | 549.4 | 71.8 | -2.3 |
| SLM 9  | 6580359 | 6190946 | 253778   | 5.71 | 16.865 | 2   | 0.7264 | 3.3 | 0.08889 | 2.5 | 0.781 | 549   | 13.4 | 554.4 | 13.9 | 576.9 | 44.1 | 4.8  |

**Composition**

**Ages**

| Zircon #            | U (238 cps) | U (norm) (238 cps) | 206Pb/204Pb | U/Th | 206Pb/207Pb (%) | 2σ  | 207Pb/235U (%) | 2σ  | 206Pb/238U (%) | 2σ  | Error Corr. | 206Pb/238U (Ma) | 2σ   | 207Pb/235U (Ma) | 2σ   | 206Pb/207Pb (Ma) | 2σ    | % Disc. |
|---------------------|-------------|--------------------|-------------|------|-----------------|-----|----------------|-----|----------------|-----|-------------|-----------------|------|-----------------|------|------------------|-------|---------|
| <b>SLM CA Run 1</b> |             |                    |             |      |                 |     |                |     |                |     |             |                 |      |                 |      |                  |       |         |
| SLM-1               | 5374175     | 7076599            | 170477      | 5.50 | 17.003          | 2.3 | 0.7299         | 3.8 | 0.09005        | 3.0 | 0.793       | 555.8           | 15.9 | 556.5           | 16.1 | 559.2            | 50.0  | 0.6     |
| SLM-3               | 4703888     | 6193980            | 38391       | 5.08 | 17.253          | 1.6 | 0.7217         | 3.5 | 0.09034        | 3.1 | 0.885       | 557.6           | 16.7 | 551.7           | 15.1 | 527.3            | 36.1  | -5.7    |
| SLM-4               | 4951877     | 6520527            | 37284       | 5.30 | 16.879          | 1.8 | 0.7551         | 3.2 | 0.09247        | 2.7 | 0.838       | 570.1           | 14.7 | 571.2           | 14.0 | 575.2            | 38.1  | 0.9     |
| SLM-5               | 1054487     | 1388526            | 6968        | 4.92 | 17.427          | 2.8 | 0.7045         | 3.8 | 0.08909        | 2.5 | 0.667       | 550.1           | 13.3 | 541.5           | 15.9 | 505.4            | 62.1  | -8.9    |
| SLM-6               | 5096681     | 6711202            | 8237        | 5.54 | 17.287          | 1.7 | 0.7113         | 3.3 | 0.08922        | 2.8 | 0.863       | 550.9           | 15.0 | 545.5           | 13.9 | 523.0            | 36.4  | -5.3    |
| SLM-8               | 4693200     | 6179906            | 33885       | 5.44 | 16.858          | 2.1 | 0.7397         | 3.3 | 0.09048        | 2.5 | 0.765       | 558.4           | 13.5 | 562.2           | 14.2 | 577.8            | 46.0  | 3.4     |
| SLM-7               | 5105173     | 6722384            | 38414       | 5.06 | 16.913          | 2.0 | 0.7395         | 3.1 | 0.09076        | 2.3 | 0.757       | 560.0           | 12.6 | 562.1           | 13.4 | 570.7            | 44.0  | 1.9     |
| SLM-10              | 3613852     | 4758643            | 109262      | 5.23 | 16.873          | 2.8 | 0.7263         | 4.2 | 0.08892        | 3.1 | 0.744       | 549.2           | 16.3 | 554.4           | 17.8 | 576.0            | 60.5  | 4.7     |
| SLM-9               | 1927352     | 2537896            | 47428       | 5.75 | 16.719          | 2.3 | 0.7605         | 3.9 | 0.09226        | 3.2 | 0.811       | 568.9           | 17.3 | 574.3           | 17.2 | 595.8            | 49.7  | 4.5     |
| SLM-11              | 5147884     | 6778625            | 38532       | 5.21 | 17.403          | 2.0 | 0.7355         | 3.5 | 0.09288        | 2.9 | 0.827       | 572.5           | 15.8 | 559.8           | 15.0 | 508.3            | 43.1  | -12.6   |
| SLM-12              | 5260145     | 6926448            | 37831       | 5.25 | 17.019          | 2.1 | 0.7348         | 3.0 | 0.09074        | 2.0 | 0.691       | 559.9           | 11.0 | 559.4           | 12.8 | 557.2            | 46.8  | -0.5    |
| SLM-13              | 4806636     | 6329277            | 16653       | 5.25 | 17.079          | 2.1 | 0.7446         | 3.2 | 0.09227        | 2.4 | 0.760       | 568.9           | 13.3 | 565.1           | 13.9 | 549.6            | 45.5  | -3.5    |
| SLM-14              | 4512961     | 5942572            | 3859958     | 5.12 | 16.646          | 2.0 | 0.7454         | 3.6 | 0.09003        | 3.0 | 0.833       | 555.7           | 16.1 | 565.5           | 15.7 | 605.3            | 43.4  | 8.2     |
| SLM-2               | 4821385     | 6348698            | 56602       | 5.42 | 17.844          | 4.5 | 0.7276         | 8.9 | 0.09421        | 7.7 | 0.862       | 580.4           | 42.6 | 555.2           | 38.1 | 453.0            | 100.2 | -28.1   |
| SLM-15              | 4979356     | 6556711            | 45967       | 5.43 | 16.628          | 2.1 | 0.7487         | 2.7 | 0.09034        | 1.8 | 0.663       | 557.5           | 9.7  | 567.5           | 11.9 | 607.6            | 44.4  | 8.2     |
| <b>SLM CA Run 2</b> |             |                    |             |      |                 |     |                |     |                |     |             |                 |      |                 |      |                  |       |         |
| SLM 1               | 7761889     | 6928492            | 1283677     | 5.08 | 16.946          | 2.3 | 0.7366         | 3.2 | 0.09057        | 2.2 | 0.693       | 558.9           | 11.9 | 560.4           | 13.8 | 566.5            | 50.3  | 1.3     |
| SLM 10              | 5468116     | 4881002            | 214351      | 5.04 | 16.955          | 1.9 | 0.7422         | 3.2 | 0.0913         | 2.6 | 0.809       | 563.2           | 14   | 563.7           | 13.9 | 565.4            | 41.2  | 0.4     |
| SLM 11              | 1532109     | 1367606            | 152546      | 4.57 | 17.099          | 2.4 | 0.7428         | 3.6 | 0.09216        | 2.8 | 0.76        | 568.3           | 15   | 564             | 15.7 | 546.9            | 51.4  | -3.9    |
| SLM 12              | 6894190     | 6153958            | 223931      | 4.76 | 16.928          | 2   | 0.7359         | 3.3 | 0.09039        | 2.6 | 0.789       | 557.8           | 13.7 | 560             | 14   | 568.8            | 43.6  | 1.9     |
| SLM 13              | 7604516     | 6788016            | 224287      | 5.32 | 16.903          | 2.3 | 0.724          | 3.2 | 0.08879        | 2.2 | 0.702       | 548.4           | 11.7 | 553             | 13.5 | 572              | 49    | 4.1     |
| SLM 14              | 3539615     | 3159565            | 107821      | 5.26 | 17.316          | 2.2 | 0.7138         | 3   | 0.08968        | 2   | 0.681       | 553.7           | 10.8 | 547             | 12.6 | 519.3            | 47.9  | -6.6    |
| SLM 15              | 2941059     | 2625276            | 99654       | 5.72 | 17.251          | 1.9 | 0.7278         | 3   | 0.0911         | 2.3 | 0.763       | 562             | 12.2 | 555.3           | 12.7 | 527.6            | 41.9  | -6.5    |
| SLM 16              | 2779888     | 2481410            | 234603      | 5.92 | 17.117          | 3   | 0.7373         | 4.1 | 0.09157        | 2.8 | 0.682       | 564.8           | 15.2 | 560.8           | 17.8 | 544.6            | 65.8  | -3.7    |
| SLM 17              | 7723835     | 6894524            | 2290943     | 5.31 | 17.047          | 2.3 | 0.7312         | 3.3 | 0.09044        | 2.4 | 0.722       | 558.2           | 12.6 | 557.3           | 14   | 553.6            | 49.2  | -0.8    |
| SLM 18              | 7892006     | 7044638            | 867172      | 5.17 | 16.884          | 2.1 | 0.7354         | 3.5 | 0.0901         | 2.8 | 0.804       | 556.1           | 15.2 | 559.7           | 15.2 | 574.4            | 45.8  | 3.2     |
| SLM 19              | 6854131     | 6118200            | 472445      | 4.84 | 17.002          | 1.8 | 0.7333         | 3.1 | 0.09046        | 2.5 | 0.803       | 558.3           | 13.2 | 558.5           | 13.2 | 559.4            | 39.8  | 0.2     |
| SLM 2               | 7104933     | 6342073            | 308248      | 5.4  | 17.018          | 1.8 | 0.7313         | 3   | 0.09031        | 2.3 | 0.786       | 557.4           | 12.5 | 557.3           | 12.8 | 557.3            | 40.1  | 0.0     |
| SLM 20              | 1566991     | 1398743            | 172597      | 4.44 | 17.028          | 2.7 | 0.7589         | 3.6 | 0.09376        | 2.3 | 0.642       | 577.8           | 12.6 | 573.4           | 15.6 | 556              | 59.5  | -3.9    |
| SLM 21              | 5432413     | 4849133            | 2358637     | 4.98 | 17.06           | 1.9 | 0.7408         | 2.7 | 0.0917         | 2   | 0.721       | 565.6           | 10.7 | 562.9           | 11.8 | 551.9            | 41.4  | -2.5    |

|        |         |         |         |      |        |     |        |     |         |     |       |       |      |       |      |       |      |      |
|--------|---------|---------|---------|------|--------|-----|--------|-----|---------|-----|-------|-------|------|-------|------|-------|------|------|
| SLM 22 | 8157057 | 7281230 | 430158  | 5.05 | 16.804 | 1.7 | 0.744  | 3.2 | 0.09071 | 2.7 | 0.843 | 559.7 | 14.3 | 564.7 | 13.7 | 584.9 | 36.8 | 4.3  |
| SLM 23 | 7482060 | 6678708 | 2709499 | 5.23 | 17.082 | 2   | 0.7331 | 3.2 | 0.09086 | 2.5 | 0.783 | 560.6 | 13.4 | 558.4 | 13.7 | 549.1 | 43.3 | -2.1 |
| SLM 24 | 7706033 | 6878633 | 325083  | 4.78 | 16.837 | 1.7 | 0.7406 | 2.8 | 0.09048 | 2.2 | 0.792 | 558.4 | 11.9 | 562.7 | 12.2 | 580.5 | 37.3 | 3.8  |
| SLM 25 | 6997553 | 6246223 | 286485  | 5.26 | 17.051 | 2.3 | 0.7335 | 3   | 0.09075 | 2   | 0.658 | 559.9 | 10.7 | 558.6 | 13   | 553.1 | 49.6 | -1.2 |
| SLM 26 | 7456304 | 6655718 | 116626  | 5.15 | 16.911 | 1.8 | 0.7379 | 4.7 | 0.09055 | 4.3 | 0.919 | 558.8 | 23.1 | 561.2 | 20.2 | 571   | 40.3 | 2.1  |
| SLM 27 | 6923383 | 6180017 | 544134  | 4.8  | 17.05  | 1.6 | 0.7414 | 2.2 | 0.09172 | 1.5 | 0.699 | 565.7 | 8.3  | 563.2 | 9.5  | 553.2 | 34.4 | -2.3 |
| SLM 28 | 6801848 | 6071531 | 485514  | 4.9  | 17.021 | 1.8 | 0.7363 | 2.8 | 0.09093 | 2.2 | 0.762 | 561   | 11.6 | 560.2 | 12.2 | 556.9 | 40.2 | -0.7 |
| SLM 29 | 7619968 | 6801809 | 3953546 | 5.04 | 17.07  | 1.7 | 0.7343 | 2.5 | 0.09095 | 1.9 | 0.738 | 561.1 | 10   | 559   | 10.9 | 550.6 | 37.2 | -1.9 |
| SLM 3  | 7909508 | 7060261 | 1298526 | 5.2  | 17.001 | 2   | 0.7374 | 2.8 | 0.09097 | 2.1 | 0.726 | 561.3 | 11.1 | 560.9 | 12.3 | 559.5 | 42.7 | -0.3 |
| SLM 30 | 7303260 | 6519106 | 606987  | 5.33 | 16.906 | 1.9 | 0.7388 | 2.6 | 0.09063 | 1.8 | 0.7   | 559.2 | 9.8  | 561.7 | 11.3 | 571.6 | 40.6 | 2.2  |
| SLM 4  | 7017993 | 6264468 | 5647563 | 4.86 | 16.789 | 1.4 | 0.7405 | 2.4 | 0.0902  | 1.9 | 0.802 | 556.7 | 10.2 | 562.7 | 10.3 | 586.8 | 30.8 | 5.1  |
| SLM 5  | 7240742 | 6463301 | 280175  | 5.16 | 16.91  | 1.5 | 0.7359 | 2.3 | 0.0903  | 1.7 | 0.731 | 557.3 | 8.9  | 560   | 9.8  | 571.2 | 33.7 | 2.4  |
| SLM 6  | 7160682 | 6391837 | 262113  | 5.23 | 16.745 | 2   | 0.7401 | 3.1 | 0.08992 | 2.4 | 0.762 | 555.1 | 12.7 | 562.5 | 13.5 | 592.4 | 44   | 6.3  |
| SLM 7  | 7961878 | 7107008 | 372548  | 4.77 | 17.054 | 2   | 0.7251 | 3   | 0.08972 | 2.3 | 0.757 | 553.9 | 12   | 553.6 | 12.8 | 552.7 | 42.6 | -0.2 |
| SLM 8  | 7503922 | 6698223 | 315856  | 5.32 | 16.995 | 1.8 | 0.7288 | 2.6 | 0.08987 | 1.9 | 0.716 | 554.8 | 10   | 555.8 | 11.2 | 560.2 | 39.9 | 1.0  |
| SLM 9  | 6843489 | 6108701 | 3196578 | 5.43 | 16.997 | 1.8 | 0.7312 | 2.8 | 0.09018 | 2.1 | 0.763 | 556.6 | 11.3 | 557.3 | 11.9 | 560   | 39.2 | 0.6  |

**TABLE S8: SLF LA-ICPMS U-Pb ZIRCON GEOCHRONOLOGY**

| Zircon #               | Composition    |                       |                 |      |                 |                   |                |                   |                |                   | Ages           |                |                    |                |                    |                 |                    |            |
|------------------------|----------------|-----------------------|-----------------|------|-----------------|-------------------|----------------|-------------------|----------------|-------------------|----------------|----------------|--------------------|----------------|--------------------|-----------------|--------------------|------------|
|                        | U<br>(238 cps) | U (norm)<br>(238 cps) | 206Pb/<br>204Pb | U/Th | 206Pb/<br>207Pb | 2 $\sigma$<br>(%) | 207Pb/<br>235U | 2 $\sigma$<br>(%) | 206Pb/<br>238U | 2 $\sigma$<br>(%) | Error<br>Corr. | 206Pb/<br>238U | 2 $\sigma$<br>(Ma) | 207Pb/<br>235U | 2 $\sigma$<br>(Ma) | 206Pb/<br>207Pb | 2 $\sigma$<br>(Ma) | %<br>Disc. |
| <b>SLF no CA Run 1</b> |                |                       |                 |      |                 |                   |                |                   |                |                   |                |                |                    |                |                    |                 |                    |            |
| SLF-1                  | 5359269        | 6130489               | 38849           | 5.42 | 16.778          | 1.5               | 0.7420         | 3.4               | 0.09034        | 3.1               | 0.897          | 557.5          | 16.3               | 563.6          | 14.8               | 588.2           | 32.7               | 5.2        |
| SLF-10                 | 5809978        | 6646057               | 36208           | 5.34 | 17.240          | 1.8               | 0.7455         | 2.8               | 0.09326        | 2.2               | 0.782          | 574.8          | 12.1               | 565.6          | 12.2               | 529.0           | 38.5               | -8.6       |
| SLF-11                 | 4310405        | 4930690               | 53756           | 5.75 | 17.079          | 1.8               | 0.7564         | 3.0               | 0.09373        | 2.4               | 0.805          | 577.5          | 13.1               | 571.9          | 12.9               | 549.6           | 38.2               | -5.1       |
| SLF-12                 | 5423737        | 6204234               | 18611           | 5.53 | 17.891          | 4.5               | 0.7242         | 6.9               | 0.09401        | 5.2               | 0.756          | 579.2          | 29.1               | 553.1          | 29.6               | 447.2           | 101.0              | -29.5      |
| SLF-13                 | 5817218        | 6654339               | 826559          | 5.63 | 16.722          | 1.4               | 0.7341         | 2.7               | 0.08907        | 2.3               | 0.858          | 550.1          | 12.0               | 559.0          | 11.4               | 595.4           | 29.6               | 7.6        |
| SLF-14                 | 5801692        | 6636578               | 24288           | 5.52 | 17.077          | 1.8               | 0.7371         | 3.3               | 0.09134        | 2.8               | 0.842          | 563.4          | 15.1               | 560.7          | 14.4               | 549.8           | 39.2               | -2.5       |
| SLF-15                 | 5759601        | 6588431               | 44438           | 5.65 | 17.097          | 1.8               | 0.7272         | 3.2               | 0.09021        | 2.6               | 0.821          | 556.8          | 13.9               | 554.9          | 13.6               | 547.3           | 39.7               | -1.7       |
| SLF-2                  | 6388900        | 7308289               | 32676           | 5.42 | 16.604          | 1.8               | 0.7643         | 3.0               | 0.09208        | 2.4               | 0.801          | 567.8          | 12.9               | 576.5          | 13.0               | 610.7           | 38.2               | 7.0        |
| SLF-3                  | 6565743        | 7510580               | 18647           | 5.71 | 17.138          | 1.4               | 0.7216         | 3.0               | 0.08974        | 2.7               | 0.889          | 554.0          | 14.1               | 551.6          | 12.7               | 542.0           | 29.8               | -2.2       |
| SLF-4                  | 6311084        | 7219274               | 1214081         | 5.55 | 17.025          | 1.4               | 0.7428         | 2.8               | 0.09175        | 2.4               | 0.866          | 565.9          | 12.9               | 564.0          | 11.9               | 556.5           | 30.1               | -1.7       |
| SLF-5                  | 3913830        | 4477046               | 37822           | 6.15 | 17.069          | 1.4               | 0.7512         | 2.8               | 0.09304        | 2.4               | 0.858          | 573.5          | 13.0               | 568.9          | 12.1               | 550.8           | 31.1               | -4.1       |
| SLF-6                  | 6186463        | 7076720               | 38805           | 5.55 | 17.004          | 2.5               | 0.7290         | 3.2               | 0.08995        | 2.0               | 0.636          | 555.2          | 10.9               | 556.0          | 13.8               | 559.1           | 54.0               | 0.7        |
| SLF-7                  | 6741229        | 7711319               | 34045           | 5.74 | 17.014          | 1.5               | 0.7157         | 2.9               | 0.08836        | 2.4               | 0.840          | 545.8          | 12.6               | 548.1          | 12.1               | 557.9           | 33.8               | 2.2        |
| SLF-8                  | 5988449        | 6850211               | 272125          | 5.58 | 16.923          | 1.3               | 0.7397         | 2.8               | 0.09082        | 2.5               | 0.878          | 560.4          | 13.3               | 562.2          | 12.2               | 569.5           | 29.4               | 1.6        |
| SLF-9                  | 5440910        | 6223879               | 37397           | 5.53 | 17.322          | 1.8               | 0.7259         | 3.5               | 0.09123        | 3.0               | 0.857          | 562.8          | 16.1               | 554.1          | 14.9               | 518.6           | 39.3               | -8.5       |
| <b>SLF no CA Run 2</b> |                |                       |                 |      |                 |                   |                |                   |                |                   |                |                |                    |                |                    |                 |                    |            |
| SLF 1                  | 7640281        | 7188144               | 951426          | 6.06 | 16.941          | 2.6               | 0.7405         | 4                 | 0.09102        | 3.1               | 0.771          | 561.6          | 16.7               | 562.7          | 17.4               | 567.2           | 55.7               | 1.0        |
| SLF 10                 | 7300296        | 6868279               | 278758          | 6.19 | 16.977          | 2.2               | 0.7458         | 3.2               | 0.09187        | 2.3               | 0.725          | 566.6          | 12.5               | 565.8          | 13.8               | 562.5           | 47.9               | -0.7       |
| SLF 11                 | 7242980        | 6814354               | 390017          | 5.89 | 16.878          | 1.6               | 0.7403         | 2.9               | 0.09066        | 2.5               | 0.84           | 559.4          | 13.2               | 562.6          | 12.6               | 575.3           | 34.6               | 2.8        |
| SLF 12                 | 7106555        | 6686003               | 320847          | 6.27 | 17.016          | 2.3               | 0.7381         | 3.4               | 0.09113        | 2.6               | 0.749          | 562.2          | 13.8               | 561.3          | 14.7               | 557.5           | 49.4               | -0.8       |
| SLF 13                 | 6737513        | 6338800               | 78280           | 6.07 | 17.008          | 2.1               | 0.7351         | 3.5               | 0.09072        | 2.8               | 0.795          | 559.8          | 14.8               | 559.6          | 15                 | 558.6           | 46                 | -0.2       |
| SLF 14                 | 6820059        | 6416461               | 121680          | 6.18 | 17.063          | 2.5               | 0.7334         | 3.8               | 0.0908         | 2.9               | 0.766          | 560.3          | 15.7               | 558.6          | 16.4               | 551.6           | 53.6               | -1.6       |
| SLF 15                 | 6858516        | 6452642               | 1945445         | 6.07 | 17.041          | 2.2               | 0.7484         | 4                 | 0.09253        | 3.4               | 0.846          | 570.5          | 18.7               | 567.3          | 17.6               | 554.3           | 47.1               | -2.9       |
| SLF 16                 | 5643898        | 5309903               | 265069          | 6.31 | 16.972          | 2.4               | 0.7333         | 3.3               | 0.09031        | 2.3               | 0.697          | 557.4          | 12.3               | 558.5          | 14.2               | 563.2           | 51.8               | 1.0        |
| SLF 17                 | 6675620        | 6280570               | 368921          | 6.24 | 17.104          | 2.1               | 0.7335         | 3.1               | 0.09104        | 2.3               | 0.745          | 561.7          | 12.6               | 558.6          | 13.5               | 546.3           | 45.8               | -2.8       |
| SLF 18                 | 6884020        | 6476637               | 1069555         | 5.93 | 16.97           | 1.7               | 0.7401         | 3.1               | 0.09113        | 2.6               | 0.842          | 562.2          | 14.1               | 562.4          | 13.5               | 563.5           | 36.6               | 0.2        |
| SLF 19                 | 7029029        | 6613065               | 6227305         | 5.83 | 17.126          | 2.1               | 0.7383         | 3.1               | 0.09174        | 2.4               | 0.75           | 565.8          | 12.8               | 561.4          | 13.5               | 543.4           | 45.5               | -4.1       |
| SLF 2                  | 6295422        | 5922871               | 338080          | 5.83 | 16.963          | 1.7               | 0.7329         | 2.5               | 0.09021        | 1.8               | 0.74           | 556.8          | 9.7                | 558.3          | 10.6               | 564.3           | 36                 | 1.3        |
| SLF 20                 | 7294662        | 6862978               | 146763          | 6.18 | 17.062          | 1.5               | 0.7402         | 2.6               | 0.09164        | 2.1               | 0.812          | 565.2          | 11.4               | 562.5          | 11.2               | 551.6           | 33.2               | -2.5       |
| SLF 21                 | 7062546        | 6644598               | 637360          | 6.18 | 16.924          | 2.2               | 0.7377         | 3.1               | 0.09059        | 2.2               | 0.714          | 559            | 12                 | 561.1          | 13.5               | 569.3           | 47.8               | 1.8        |
| SLF 22                 | 6802013        | 6399483               | 415108          | 6.14 | 17.018          | 2.4               | 0.7345         | 3.7               | 0.09069        | 2.8               | 0.767          | 559.6          | 15.1               | 559.2          | 15.8               | 557.3           | 51.4               | -0.4       |
| SLF 23                 | 6684229        | 6288669               | 1005130         | 6.14 | 17.075          | 2.5               | 0.7386         | 3.2               | 0.09151        | 2                 | 0.622          | 564.5          | 10.7               | 561.6          | 13.8               | 550             | 54.7               | -2.6       |
| SLF 24                 | 7244526        | 6815809               | 223195          | 6.04 | 16.849          | 2.3               | 0.7453         | 3.5               | 0.09111        | 2.6               | 0.754          | 562.1          | 14.1               | 565.5          | 15.1               | 579             | 49.8               | 2.9        |
| SLF 25                 | 6329092        | 5954548               | 510381          | 5.98 | 16.861          | 2.2               | 0.7475         | 2.8               | 0.09145        | 1.7               | 0.622          | 564.1          | 9.4                | 566.8          | 12.1               | 577.5           | 47.5               | 2.3        |
| SLF 26                 | 6860073        | 6454107               | 1686134         | 6.19 | 17.106          | 1.7               | 0.7325         | 2.9               | 0.09092        | 2.4               | 0.811          | 561            | 12.8               | 558            | 12.6               | 546             | 37.6               | -2.7       |
| SLF 27                 | 6844589        | 6439539               | 184158          | 5.96 | 17.091          | 1.8               | 0.7328         | 3                 | 0.09088        | 2.4               | 0.804          | 560.7          | 13                 | 558.2          | 12.9               | 548             | 39.1               | -2.3       |
| SLF 28                 | 7529542        | 7083958               | 247904          | 6.3  | 16.932          | 1.8               | 0.74           | 3.1               | 0.09091        | 2.5               | 0.81           | 560.9          | 13.5               | 562.4          | 13.4               | 568.4           | 39.4               | 1.3        |
| SLF 29                 | 7496805        | 7053158               | 302715          | 5.95 | 17.053          | 2.3               | 0.734          | 3.4               | 0.09082        | 2.5               | 0.744          | 560.4          | 13.6               | 558.9          | 14.7               | 552.8           | 49.7               | -1.4       |

|        |         |         |         |      |        |     |        |     |         |     |       |       |      |       |      |       |      |      |
|--------|---------|---------|---------|------|--------|-----|--------|-----|---------|-----|-------|-------|------|-------|------|-------|------|------|
| SLF 3  | 7167057 | 6742924 | 126413  | 6.13 | 17.152 | 2.2 | 0.7206 | 3.5 | 0.08969 | 2.8 | 0.785 | 553.7 | 14.7 | 551   | 15   | 540.1 | 47.8 | -2.5 |
| SLF 30 | 6985008 | 6571649 | 1137341 | 6.11 | 17.046 | 1.9 | 0.7362 | 3.6 | 0.09106 | 3   | 0.848 | 561.8 | 16.2 | 560.2 | 15.3 | 553.6 | 41.1 | -1.5 |
| SLF 4  | 7322221 | 6888906 | 349860  | 6.12 | 17.133 | 2.3 | 0.7344 | 3.6 | 0.0913  | 2.7 | 0.772 | 563.2 | 14.8 | 559.1 | 15.3 | 542.6 | 49.4 | -3.8 |
| SLF 5  | 8189723 | 7705071 | 218098  | 6.02 | 16.872 | 2   | 0.7462 | 3.2 | 0.09135 | 2.4 | 0.77  | 563.5 | 13.2 | 566   | 13.8 | 576   | 44.1 | 2.2  |
| SLF 6  | 6273695 | 5902430 | 1.6E+07 | 5.91 | 17.074 | 2.2 | 0.7347 | 3.4 | 0.09102 | 2.5 | 0.752 | 561.6 | 13.6 | 559.3 | 14.4 | 550.1 | 48.2 | -2.1 |
| SLF 7  | 7052134 | 6634802 | 1481454 | 6.14 | 16.922 | 2.4 | 0.7417 | 3.2 | 0.09107 | 2.1 | 0.657 | 561.9 | 11.5 | 563.4 | 14   | 569.6 | 53.2 | 1.4  |
| SLF 8  | 5720609 | 5382074 | 250616  | 6.35 | 17.058 | 2   | 0.728  | 3.4 | 0.0901  | 2.7 | 0.805 | 556.1 | 14.4 | 555.4 | 14.4 | 552.2 | 43.4 | -0.7 |
| SLF 9  | 7593195 | 7143844 | 688740  | 6.05 | 17.075 | 1.9 | 0.7396 | 3   | 0.09164 | 2.3 | 0.766 | 565.2 | 12.3 | 562.2 | 12.8 | 550   | 41.4 | -2.8 |

**Composition**

**Ages**

| Zircon #            | U<br>(238 cps) | U (norm)<br>(238 cps) | 206Pb/<br>204Pb | U/Th | 206Pb/<br>207Pb | 2σ (%) | 207Pb/<br>235U | 2σ (%) | 206Pb/<br>238U | 2σ (%) | Error<br>Corr. | 206Pb/<br>238U | 2σ<br>(Ma) | 207Pb/<br>235U | 2σ<br>(Ma) | 206Pb/<br>207Pb | 2σ<br>(Ma) | %<br>Disc. |
|---------------------|----------------|-----------------------|-----------------|------|-----------------|--------|----------------|--------|----------------|--------|----------------|----------------|------------|----------------|------------|-----------------|------------|------------|
| <b>SLF CA Run 1</b> |                |                       |                 |      |                 |        |                |        |                |        |                |                |            |                |            |                 |            |            |
| SLF-1               | 5279678        | 6952168               | 48830           | 5.36 | 16.579          | 1.2    | 0.7522         | 1.9    | 0.0905         | 1.4    | 0.742          | 558.4          | 7.4        | 569.5          | 8.1        | 614.0           | 26.9       | 9.1        |
| SLF-10              | 5222907        | 6877414               | 35189           | 5.77 | 16.978          | 1.0    | 0.7134         | 1.7    | 0.0879         | 1.4    | 0.813          | 543.0          | 7.1        | 546.7          | 7.1        | 562.5           | 21.4       | 3.5        |
| SLF-11              | 4529281        | 5964061               | 35524           | 5.36 | 17.000          | 1.0    | 0.7463         | 1.8    | 0.0921         | 1.5    | 0.823          | 567.7          | 8.2        | 566.1          | 7.9        | 559.6           | 22.6       | -1.4       |
| SLF-12              | 4837660        | 6370129               | 30648           | 5.67 | 16.975          | 1.1    | 0.7273         | 1.7    | 0.0896         | 1.4    | 0.778          | 553.1          | 7.2        | 555.0          | 7.5        | 562.8           | 23.9       | 1.7        |
| SLF-13              | 4599438        | 6056443               | 42220           | 5.08 | 16.719          | 1.0    | 0.7519         | 2.0    | 0.0912         | 1.7    | 0.854          | 562.7          | 9.2        | 569.3          | 8.7        | 595.8           | 22.5       | 5.6        |
| SLF-14              | 5058159        | 6660477               | 83661           | 5.47 | 16.875          | 0.9    | 0.7334         | 1.6    | 0.0898         | 1.4    | 0.850          | 554.4          | 7.4        | 558.6          | 7.1        | 575.6           | 18.9       | 3.7        |
| SLF-15              | 4722173        | 6218058               | 45299           | 5.44 | 17.007          | 1.2    | 0.7351         | 1.9    | 0.0907         | 1.6    | 0.803          | 559.7          | 8.4        | 559.5          | 8.4        | 558.7           | 25.3       | -0.2       |
| SLF-2               | 4647635        | 6119907               | 50944           | 5.39 | 16.862          | 0.9    | 0.7426         | 1.7    | 0.0909         | 1.4    | 0.843          | 560.6          | 7.6        | 563.9          | 7.2        | 577.4           | 19.6       | 2.9        |
| SLF-3               | 5045288        | 6643528               | 110051          | 5.58 | 16.739          | 0.9    | 0.7501         | 1.6    | 0.0911         | 1.4    | 0.849          | 562.0          | 7.5        | 568.3          | 7.2        | 593.2           | 18.8       | 5.3        |
| SLF-4               | 5027861        | 6620581               | 47230           | 5.69 | 16.874          | 0.9    | 0.7407         | 1.7    | 0.0907         | 1.4    | 0.838          | 559.6          | 7.4        | 562.8          | 7.1        | 575.7           | 19.6       | 2.8        |
| SLF-5               | 5239543        | 6899319               | 24629           | 5.36 | 17.089          | 1.1    | 0.7302         | 1.8    | 0.0905         | 1.5    | 0.800          | 558.8          | 7.8        | 556.7          | 7.8        | 548.2           | 23.7       | -1.9       |
| SLF-6               | 4765886        | 6275617               | 132812          | 5.58 | 17.191          | 1.1    | 0.7428         | 1.7    | 0.0927         | 1.4    | 0.791          | 571.2          | 7.4        | 564.1          | 7.4        | 535.2           | 23.1       | -6.7       |
| SLF-7               | 3821501        | 5032072               | 28238           | 5.78 | 16.813          | 1.1    | 0.7348         | 1.9    | 0.0896         | 1.6    | 0.829          | 553.4          | 8.3        | 559.4          | 8.1        | 583.6           | 22.8       | 5.2        |
| SLF-8               | 4845533        | 6380495               | 25688           | 5.64 | 17.328          | 1.1    | 0.7261         | 1.9    | 0.0913         | 1.6    | 0.833          | 563.2          | 8.6        | 554.3          | 8.2        | 517.8           | 23.3       | -8.8       |
| SLF-9               | 4756357        | 6263071               | 32569           | 5.40 | 16.918          | 0.9    | 0.7487         | 1.5    | 0.0919         | 1.2    | 0.823          | 566.8          | 6.7        | 567.4          | 6.6        | 570.2           | 18.7       | 0.6        |
| <b>SLF CA Run 2</b> |                |                       |                 |      |                 |        |                |        |                |        |                |                |            |                |            |                 |            |            |
| SLF 1               | 7149600        | 6381945               | 212354          | 5.14 | 16.99           | 1.5    | 0.7503         | 2.5    | 0.09249        | 1.9    | 0.783          | 570.3          | 10.6       | 568.4          | 10.8       | 560.9           | 33.5       | -1.7       |
| SLF 10              | 7186262        | 6414670               | 1.8E+07         | 5.36 | 16.987          | 2.2    | 0.7267         | 3.2    | 0.08957        | 2.4    | 0.735          | 553            | 12.5       | 554.6          | 13.8       | 561.2           | 47.6       | 1.5        |
| SLF 11              | 7257347        | 6478123               | 319009          | 5.16 | 16.889          | 2.2    | 0.7401         | 3.3    | 0.0907         | 2.4    | 0.733          | 559.7          | 12.9       | 562.5          | 14.2       | 573.8           | 48.7       | 2.5        |
| SLF 12              | 7365503        | 6574666               | 179903          | 5.16 | 16.946          | 2.3    | 0.733          | 3      | 0.09013        | 2      | 0.669          | 556.3          | 10.9       | 558.3          | 13.1       | 566.5           | 49.3       | 1.8        |
| SLF 13              | 6660270        | 5945154               | 298586          | 4.91 | 16.988          | 2      | 0.7356         | 3.2    | 0.09068        | 2.5    | 0.768          | 559.5          | 13.2       | 559.8          | 13.8       | 561.1           | 44.6       | 0.3        |
| SLF 14              | 7606370        | 6789671               | 215508          | 5.24 | 17.018          | 2.3    | 0.7306         | 3.1    | 0.09022        | 2      | 0.664          | 556.8          | 10.9       | 556.9          | 13.2       | 557.3           | 50.1       | 0.1        |
| SLF 15              | 7968478        | 7112899               | 170455          | 5.14 | 16.858          | 1.8    | 0.7331         | 2.7    | 0.08967        | 2.1    | 0.749          | 553.6          | 10.9       | 558.4          | 11.8       | 577.8           | 39.5       | 4.2        |
| SLF 16              | 6666829        | 5951009               | 676963          | 5.13 | 17.026          | 1.8    | 0.7295         | 2.5    | 0.09012        | 1.8    | 0.711          | 556.2          | 9.5        | 556.2          | 10.7       | 556.3           | 38.2       | 0.0        |
| SLF 17              | 7036614        | 6281090               | 332443          | 5.27 | 16.928          | 1.5    | 0.7272         | 2.6    | 0.08932        | 2.1    | 0.808          | 551.5          | 10.9       | 554.9          | 10.9       | 568.9           | 32.9       | 3.1        |
| SLF 18              | 7177464        | 6406817               | 382381          | 5.26 | 16.979          | 1.8    | 0.7338         | 2.6    | 0.09041        | 1.8    | 0.704          | 558            | 9.7        | 558.8          | 11.1       | 562.2           | 39.9       | 0.7        |
| SLF 19              | 7167911        | 6398289               | 806568          | 5.27 | 17.143          | 1.9    | 0.7313         | 2.9    | 0.09097        | 2.2    | 0.756          | 561.3          | 11.8       | 557.3          | 12.5       | 541.3           | 41.7       | -3.7       |
| SLF 2               | 7706431        | 6878988               | 436882          | 5.25 | 17.142          | 1.9    | 0.7349         | 3.1    | 0.09141        | 2.4    | 0.79           | 563.9          | 13.1       | 559.4          | 13.2       | 541.4           | 41.3       | -4.2       |
| SLF 20              | 6643418        | 5930111               | 5946153         | 5.23 | 17.031          | 2      | 0.7359         | 3      | 0.09094        | 2.2    | 0.741          | 561.1          | 12         | 560            | 13         | 555.6           | 44.1       | -1.0       |
| SLF 21              | 7136741        | 6370466               | 531644          | 5.15 | 16.999          | 2.1    | 0.724          | 2.8    | 0.0893         | 1.8    | 0.658          | 551.4          | 9.8        | 553            | 12         | 559.8           | 46.1       | 1.5        |
| SLF 22              | 8037616        | 7174614               | 372277          | 5.18 | 16.849          | 1.6    | 0.7311         | 2.5    | 0.08938        | 1.9    | 0.766          | 551.9          | 10.1       | 557.2          | 10.7       | 579             | 34.8       | 4.7        |

|        |         |         |         |      |        |     |        |     |         |     |       |       |      |       |      |       |      |      |
|--------|---------|---------|---------|------|--------|-----|--------|-----|---------|-----|-------|-------|------|-------|------|-------|------|------|
| SLF 23 | 7014816 | 6261632 | 1.7E+07 | 4.92 | 17.004 | 1.9 | 0.7237 | 2.6 | 0.08929 | 1.9 | 0.711 | 551.3 | 9.9  | 552.8 | 11.2 | 559   | 40.4 | 1.4  |
| SLF 24 | 7084075 | 6323455 | 107781  | 5.37 | 17.061 | 2.5 | 0.726  | 3.2 | 0.08988 | 2   | 0.62  | 554.8 | 10.6 | 554.2 | 13.8 | 551.8 | 55.3 | -0.5 |
| SLF 25 | 7117197 | 6353021 | 443708  | 5.24 | 16.902 | 2   | 0.7351 | 3.1 | 0.09015 | 2.4 | 0.767 | 556.4 | 12.8 | 559.5 | 13.4 | 572.1 | 43.6 | 2.7  |
| SLF 26 | 7203872 | 6430389 | 332810  | 5.32 | 16.878 | 2.2 | 0.738  | 3.2 | 0.09038 | 2.4 | 0.735 | 557.8 | 12.7 | 561.2 | 14   | 575.2 | 47.9 | 3.0  |
| SLF 27 | 7121667 | 6357011 | 290796  | 5.23 | 16.965 | 2.7 | 0.7356 | 3.2 | 0.09054 | 1.7 | 0.534 | 558.8 | 9    | 559.8 | 13.6 | 564.1 | 58.1 | 0.9  |
| SLF 28 | 7657951 | 6835714 | 168079  | 5.11 | 17.111 | 2.3 | 0.7315 | 3.1 | 0.09082 | 2.1 | 0.671 | 560.4 | 11.2 | 557.4 | 13.3 | 545.4 | 50.3 | -2.8 |
| SLF 29 | 5678379 | 5068689 | 304201  | 5.28 | 17.069 | 2   | 0.7301 | 3.4 | 0.09043 | 2.8 | 0.817 | 558.1 | 14.9 | 556.6 | 14.6 | 550.7 | 42.8 | -1.3 |
| SLF 3  | 7134735 | 6368676 | 229942  | 5.29 | 17.063 | 1.8 | 0.7437 | 2.6 | 0.09207 | 1.9 | 0.73  | 567.8 | 10.4 | 564.5 | 11.3 | 551.5 | 39.1 | -3.0 |
| SLF 30 | 7110174 | 6346752 | 726344  | 4.97 | 17.125 | 1.7 | 0.747  | 2.6 | 0.09282 | 2   | 0.764 | 572.2 | 10.7 | 566.5 | 11.1 | 543.6 | 36.2 | -5.3 |
| SLF 4  | 7240788 | 6463342 | 366780  | 5.16 | 17.165 | 2   | 0.7319 | 3.2 | 0.09116 | 2.5 | 0.779 | 562.4 | 13.3 | 557.7 | 13.6 | 538.4 | 43.5 | -4.5 |
| SLF 5  | 7059792 | 6301779 | 213426  | 5.11 | 16.926 | 1.6 | 0.74   | 2.5 | 0.09089 | 1.9 | 0.76  | 560.8 | 10.2 | 562.4 | 10.8 | 569.2 | 35.2 | 1.5  |
| SLF 6  | 5694539 | 5083114 | 165674  | 5.27 | 17.093 | 1.7 | 0.7309 | 3   | 0.09065 | 2.5 | 0.825 | 559.4 | 13.5 | 557.1 | 13.1 | 547.7 | 37.6 | -2.1 |
| SLF 7  | 7653041 | 6831331 | 1.9E+07 | 5.22 | 16.922 | 1.6 | 0.7331 | 2.7 | 0.09001 | 2.1 | 0.801 | 555.6 | 11.3 | 558.4 | 11.4 | 569.7 | 34.7 | 2.5  |
| SLF 8  | 6835206 | 6101307 | 204365  | 5.13 | 16.885 | 1.7 | 0.7463 | 2.8 | 0.09144 | 2.3 | 0.797 | 564   | 12.2 | 566.1 | 12.3 | 574.4 | 37.3 | 1.8  |
| SLF 9  | 7228036 | 6451959 | 1899868 | 5.28 | 17.017 | 1.4 | 0.7351 | 2.3 | 0.09076 | 1.8 | 0.796 | 560   | 9.8  | 559.5 | 9.9  | 557.5 | 30.4 | -0.4 |



**TABLE S9: 91500 LA-ICPMS U-Pb ZIRCON GEOCHRONOLOGY**

| Zircon<br>#                           | Composition |           |        |      |        |      |        |     |         | Ages   |       |        |      |        |      |        |       |       |
|---------------------------------------|-------------|-----------|--------|------|--------|------|--------|-----|---------|--------|-------|--------|------|--------|------|--------|-------|-------|
|                                       | U           | U (norm)  | 206Pb/ | U/Th | 206Pb/ | 2σ   | 207Pb/ | 2σ  | Error   | 206Pb/ | 2σ    | 207Pb/ | 2σ   | 206Pb/ | 2σ   | %      |       |       |
|                                       | (238 cps)   | (238 cps) | 204Pb  |      | 207Pb  | (%)  | 235U   | (%) | 238U    | (%)    | Corr. | 238U   | (Ma) | 235U   | (Ma) | 207Pb  | (Ma)  | Disc. |
| <b>91500 no CA Run 1</b>              |             |           |        |      |        |      |        |     |         |        |       |        |      |        |      |        |       |       |
| 91500-1                               | 634053.3    | 725296    | 11484  | 2.85 | 13.430 | 26.9 | 1.828  | 4.0 | 0.17811 | 3.0    | 0.756 | 1056.6 | 29.7 | 1055.5 | 26.5 | 1053.1 | 53.2  | -0.3  |
| 91500-2                               | 652610.4    | 746524    | 14269  | 2.83 | 13.400 | 26.8 | 1.857  | 3.9 | 0.18055 | 2.8    | 0.719 | 1070.0 | 27.4 | 1065.9 | 25.5 | 1057.6 | 54.0  | -1.2  |
| 91500-3                               | 553709.7    | 633391    | 14357  | 2.87 | 13.542 | 27.1 | 1.811  | 3.8 | 0.17793 | 2.9    | 0.763 | 1055.6 | 27.9 | 1049.3 | 24.6 | 1036.3 | 49.0  | -1.9  |
| 91500-5                               | 670517.9    | 767008    | 14029  | 2.82 | 13.374 | 26.7 | 1.836  | 3.9 | 0.17812 | 2.9    | 0.752 | 1056.7 | 28.2 | 1058.3 | 25.3 | 1061.5 | 51.1  | 0.5   |
| 91500-6                               | 677612      | 775123    | 7620   | 2.91 | 13.393 | 26.8 | 1.796  | 4.7 | 0.17451 | 3.5    | 0.758 | 1036.9 | 34.0 | 1043.9 | 30.5 | 1058.7 | 61.3  | 2.1   |
| 91500-8                               | 580827.7    | 664411    | 76895  | 2.99 | 13.564 | 27.1 | 1.810  | 6.9 | 0.17810 | 5.2    | 0.749 | 1056.6 | 50.5 | 1049.0 | 45.2 | 1033.1 | 92.5  | -2.3  |
| 91500-9                               | 587030.9    | 671507    | 5890   | 2.81 | 13.682 | 27.4 | 1.755  | 3.2 | 0.17427 | 2.7    | 0.860 | 1035.6 | 26.1 | 1029.2 | 20.5 | 1015.5 | 32.7  | -2.0  |
| 91500-10                              | 661089      | 756222    | 6004   | 2.92 | 13.085 | 26.2 | 1.834  | 6.8 | 0.17416 | 3.5    | 0.518 | 1035.0 | 33.7 | 1057.8 | 44.7 | 1105.3 | 116.3 | 6.4   |
| 91500-11                              | 596656.5    | 682518    | 9787   | 2.87 | 13.730 | 27.5 | 1.778  | 4.6 | 0.17715 | 3.6    | 0.778 | 1051.4 | 35.0 | 1037.5 | 30.2 | 1008.4 | 59.1  | -4.3  |
| 91500-12                              | 619610.2    | 708775    | 22374  | 3.02 | 13.585 | 27.2 | 1.772  | 4.5 | 0.17469 | 3.1    | 0.690 | 1037.9 | 29.8 | 1035.3 | 29.2 | 1029.9 | 65.9  | -0.8  |
| 91500-13                              | 509094.8    | 582356    | 4784   | 2.92 | 13.689 | 27.4 | 1.784  | 4.7 | 0.17722 | 3.1    | 0.660 | 1051.7 | 30.1 | 1039.7 | 30.6 | 1014.5 | 71.6  | -3.7  |
| 91500-14                              | 629584.9    | 720185    | 6618   | 2.90 | 13.740 | 27.5 | 1.754  | 5.6 | 0.17491 | 3.8    | 0.683 | 1039.1 | 36.6 | 1028.8 | 36.1 | 1006.9 | 82.7  | -3.2  |
| 91500-15                              | 635554.7    | 727014    | 10448  | 3.01 | 13.706 | 27.4 | 1.775  | 6.7 | 0.17651 | 5.3    | 0.790 | 1047.9 | 51.5 | 1036.3 | 43.7 | 1012.0 | 83.6  | -3.6  |
| <b>91500 no CA Run 1 (discordant)</b> |             |           |        |      |        |      |        |     |         |        |       |        |      |        |      |        |       |       |
| 91500-4                               | 629502.8    | 720091    | 5414   | 2.90 | 13.859 | 27.7 | 1.747  | 6.2 | 0.17564 | 3.5    | 0.567 | 1043.1 | 33.7 | 1025.9 | 39.8 | 989.5  | 103.3 | -5.4  |
| 91500-7                               | 684178.3    | 782634    | 8783   | 2.71 | 13.964 | 27.9 | 1.743  | 2.9 | 0.17662 | 2.2    | 0.737 | 1048.5 | 21.0 | 1024.6 | 19.0 | 974.1  | 40.6  | -7.6  |
| <b>91500 no CA Run 2</b>              |             |           |        |      |        |      |        |     |         |        |       |        |      |        |      |        |       |       |
| 91500 10                              | 700145      | 658711.76 | 432045 | 2.99 | 13.341 | 2.9  | 1.857  | 4.9 | 0.17976 | 3.9    | 0.804 | 1065.7 | 38.8 | 1065.9 | 32.4 | 1066.4 | 58.7  | 0.1   |
| 91500 11                              | 536345      | 504605.13 | 63264  | 3.16 | 13.456 | 3.3  | 1.847  | 5.1 | 0.18028 | 3.9    | 0.762 | 1068.5 | 38   | 1062.2 | 33.4 | 1049.2 | 66.2  | -1.8  |
| 91500 12                              | 616229      | 579761.75 | 285731 | 3.25 | 13.262 | 3    | 1.851  | 4.8 | 0.17811 | 3.8    | 0.788 | 1056.7 | 37   | 1063.8 | 31.8 | 1078.4 | 59.5  | 2.0   |
| 91500 13                              | 887986      | 835436.69 | 54142  | 2.94 | 13.398 | 2.8  | 1.846  | 4.1 | 0.17948 | 3.1    | 0.742 | 1064.1 | 30.2 | 1062.1 | 27.3 | 1058   | 56    | -0.6  |
| 91500 14                              | 755401      | 710697.82 | 114360 | 2.94 | 13.617 | 3.1  | 1.775  | 6.2 | 0.17539 | 5.3    | 0.861 | 1041.7 | 51.4 | 1036.4 | 40.3 | 1025.2 | 63.7  | -1.6  |
| 91500 15                              | 836198      | 786713.41 | 213814 | 2.91 | 13.368 | 2.8  | 1.839  | 3.5 | 0.17841 | 2.2    | 0.628 | 1058.3 | 21.7 | 1059.7 | 23.3 | 1062.4 | 55.4  | 0.4   |
| 91500 16                              | 732541      | 689190.63 | 81913  | 3.12 | 13.389 | 2.5  | 1.811  | 3.8 | 0.17594 | 2.8    | 0.735 | 1044.7 | 26.6 | 1049.4 | 24.5 | 1059.3 | 51.2  | 1.4   |
| 91500 17                              | 738883      | 695157.32 | 31127  | 3.04 | 13.542 | 2.5  | 1.794  | 4   | 0.17631 | 3.2    | 0.789 | 1046.8 | 30.8 | 1043.4 | 26.4 | 1036.3 | 50.3  | -1.0  |
| 91500 18                              | 727407      | 684360.45 | 366302 | 2.92 | 13.404 | 2.3  | 1.867  | 4.5 | 0.1816  | 3.9    | 0.862 | 1075.7 | 38.8 | 1069.6 | 30.1 | 1057   | 46.4  | -1.8  |
| 91500 19                              | 744519      | 700459.8  | 46412  | 3.03 | 13.522 | 3.4  | 1.815  | 5   | 0.1781  | 3.6    | 0.731 | 1056.6 | 35.4 | 1051   | 32.5 | 1039.3 | 68.5  | -1.7  |
| 91500 2                               | 846340      | 796255.22 | 69741  | 2.96 | 13.582 | 3.2  | 1.813  | 4.2 | 0.17864 | 2.7    | 0.646 | 1059.6 | 26.6 | 1050.1 | 27.5 | 1030.3 | 64.9  | -2.8  |
| 91500 20                              | 668804      | 629225.46 | 100000 | 2.97 | 13.479 | 3.8  | 1.892  | 5.5 | 0.18501 | 4      | 0.723 | 1094.3 | 39.9 | 1078.2 | 36.4 | 1045.7 | 76.5  | -4.6  |
| 91500 21                              | 720577      | 677934.64 | 144706 | 3.05 | 13.611 | 2.3  | 1.778  | 4.4 | 0.1756  | 3.7    | 0.846 | 1042.9 | 35.9 | 1037.5 | 28.6 | 1026   | 47.5  | -1.6  |
| 91500 22                              | 738851      | 695127.22 | 495552 | 2.98 | 13.359 | 2.8  | 1.838  | 5.2 | 0.17815 | 4.4    | 0.839 | 1056.8 | 42.5 | 1059.1 | 34.2 | 1063.7 | 57    | 0.6   |
| 91500 23                              | 584518      | 549927.35 | 52834  | 3.13 | 13.442 | 2.9  | 1.834  | 4.8 | 0.17889 | 3.8    | 0.798 | 1060.9 | 37.2 | 1057.7 | 31.4 | 1051.2 | 58    | -0.9  |
| 91500 24                              | 584176      | 549605.59 | 175805 | 3.27 | 13.567 | 3.1  | 1.808  | 5.5 | 0.17793 | 4.6    | 0.83  | 1055.7 | 44.6 | 1048.2 | 36.1 | 1032.6 | 62.2  | -2.2  |
| 91500 25                              | 813305      | 765175.17 | 64128  | 2.86 | 13.521 | 2.1  | 1.827  | 3   | 0.17926 | 2.2    | 0.736 | 1062.9 | 22   | 1055.3 | 20   | 1039.5 | 41.7  | -2.3  |
| 91500 26                              | 882655      | 830421.17 | 312938 | 2.86 | 13.522 | 2.2  | 1.825  | 4.8 | 0.1791  | 4.2    | 0.883 | 1062   | 41.2 | 1054.6 | 31.2 | 1039.3 | 45.2  | -2.2  |
| 91500 27                              | 568807      | 535146.09 | 29356  | 3.07 | 13.696 | 3.7  | 1.802  | 6   | 0.17904 | 4.8    | 0.787 | 1061.7 | 46.5 | 1046   | 39.4 | 1013.4 | 75.4  | -4.8  |
| 91500 28                              | 651213      | 612675.47 | 157634 | 3.02 | 13.548 | 2.4  | 1.805  | 4.1 | 0.17742 | 3.3    | 0.81  | 1052.9 | 31.9 | 1047.2 | 26.5 | 1035.4 | 48.1  | -1.7  |
| 91500 29                              | 687162      | 646497.07 | 81428  | 3    | 13.574 | 2.7  | 1.8    | 4.2 | 0.17728 | 3.2    | 0.774 | 1052.1 | 31.5 | 1045.4 | 27.4 | 1031.6 | 53.8  | -2.0  |

|          |        |           |         |      |        |     |       |     |         |     |       |        |      |        |      |        |      |      |
|----------|--------|-----------|---------|------|--------|-----|-------|-----|---------|-----|-------|--------|------|--------|------|--------|------|------|
| 91500 3  | 592656 | 557583.76 | 110996  | 3.18 | 13.538 | 3.2 | 1.8   | 4.7 | 0.17684 | 3.4 | 0.724 | 1049.7 | 33   | 1045.6 | 30.7 | 1036.9 | 65.6 | -1.2 |
| 91500 30 | 587368 | 552608.69 | 111474  | 3.2  | 13.1   | 2.4 | 1.832 | 4.6 | 0.17418 | 3.9 | 0.85  | 1035.1 | 37.6 | 1057.1 | 30.4 | 1103   | 48.7 | 6.2  |
| 91500 4  | 992444 | 933713.07 | 36613   | 2.95 | 13.445 | 2.3 | 1.772 | 3.7 | 0.1729  | 2.9 | 0.793 | 1028.1 | 27.9 | 1035.4 | 24   | 1050.9 | 45.5 | 2.2  |
| 91500 5  | 581232 | 546835.81 | 76415   | 3.33 | 13.542 | 2.2 | 1.8   | 4   | 0.17684 | 3.4 | 0.841 | 1049.7 | 32.5 | 1045.3 | 26.1 | 1036.2 | 43.8 | -1.3 |
| 91500 6  | 608523 | 572511.78 | 26391   | 3.26 | 13.545 | 2.7 | 1.783 | 4.8 | 0.17523 | 4   | 0.831 | 1040.9 | 38.7 | 1039.3 | 31.5 | 1035.9 | 54.5 | -0.5 |
| 91500 7  | 745724 | 701593.49 | 118619  | 2.98 | 13.298 | 2.3 | 1.813 | 4.6 | 0.17495 | 3.9 | 0.86  | 1039.3 | 37.8 | 1050.2 | 30   | 1073   | 46.9 | 3.1  |
| 91500 8  | 917252 | 862970.79 | 2036753 | 2.97 | 13.44  | 3   | 1.773 | 4.6 | 0.17293 | 3.5 | 0.763 | 1028.2 | 33.2 | 1035.7 | 29.7 | 1051.7 | 59.7 | 2.2  |
| 91500 9  | 767342 | 721932.17 | 379323  | 2.96 | 13.612 | 2.8 | 1.795 | 4.4 | 0.17731 | 3.4 | 0.77  | 1052.3 | 32.7 | 1043.7 | 28.5 | 1025.8 | 56.4 | -2.6 |

Ages

| Zircon #                           | U (238 cps) | U (norm) (238 cps) | 206Pb/204Pb | U/Th | 206Pb/207Pb (%) | 2σ  | 207Pb/235U (%) | 2σ   | 206Pb/238U (%) | 2σ   | Error | 206Pb/238U (Ma) | 2σ    | 207Pb/235U (Ma) | 2σ    | 206Pb/207Pb (Ma) | 2σ    | % Disc. |
|------------------------------------|-------------|--------------------|-------------|------|-----------------|-----|----------------|------|----------------|------|-------|-----------------|-------|-----------------|-------|------------------|-------|---------|
| <b>91500 CA Run 1</b>              |             |                    |             |      |                 |     |                |      |                |      |       |                 |       |                 |       |                  |       |         |
| 91500-1                            | 552634      | 727697             | 7828        | 2.76 | 13.519          | 2.1 | 1.734          | 3.8  | 0.17010        | 3.2  | 0.837 | 1012.7          | 29.6  | 1021.3          | 24.3  | 1039.7           | 41.8  | 2.6     |
| 91500-4                            | 587197.4    | 773209             | 12666       | 2.78 | 13.318          | 3.2 | 1.724          | 6.1  | 0.16660        | 5.1  | 0.845 | 993.4           | 47.1  | 1017.5          | 38.9  | 1069.9           | 65.1  | 7.2     |
| 91500-5                            | 506936.9    | 667524             | 6638        | 2.84 | 13.671          | 3.2 | 1.715          | 4.5  | 0.17010        | 3.3  | 0.716 | 1012.6          | 30.5  | 1014.1          | 29.2  | 1017.2           | 64.3  | 0.4     |
| 91500-6                            | 460908.8    | 606915             | 34450       | 2.70 | 13.329          | 3.0 | 1.481          | 3.9  | 0.14321        | 2.6  | 0.652 | 862.8           | 20.7  | 922.5           | 23.9  | 1068.2           | 60.0  | 19.2    |
| 91500-7                            | 587833.6    | 774047             | 14397       | 2.73 | 13.441          | 2.4 | 1.728          | 4.7  | 0.16855        | 4.0  | 0.855 | 1004.1          | 37.3  | 1019.1          | 30.2  | 1051.5           | 49.1  | 4.5     |
| 91500-8                            | 559646.4    | 736930             | 25835       | 2.59 | 13.605          | 2.7 | 1.783          | 3.3  | 0.17597        | 1.9  | 0.565 | 1044.9          | 18.1  | 1039.1          | 21.6  | 1027.0           | 55.4  | -1.7    |
| 91500-10                           | 530936.7    | 699126             | 62285       | 2.75 | 13.710          | 2.1 | 1.747          | 3.9  | 0.17379        | 3.3  | 0.840 | 1033.0          | 31.3  | 1026.1          | 25.2  | 1011.4           | 42.8  | -2.1    |
| 91500-11                           | 522674.9    | 688247             | 13338       | 2.75 | 13.774          | 7.2 | 1.748          | 11.3 | 0.17468        | 8.7  | 0.768 | 1037.8          | 83.2  | 1026.3          | 73.1  | 1001.9           | 147.3 | -3.6    |
| 91500-14                           | 581317.7    | 765467             | 22529       | 2.74 | 13.542          | 2.2 | 1.735          | 3.4  | 0.17050        | 2.6  | 0.756 | 1014.9          | 24.2  | 1021.7          | 22.0  | 1036.4           | 45.1  | 2.1     |
| 91500-15                           | 491536.6    | 647245             | 97207       | 2.83 | 13.487          | 3.6 | 1.745          | 5.3  | 0.17073        | 3.9  | 0.728 | 1016.2          | 36.2  | 1025.2          | 34.2  | 1044.5           | 73.3  | 2.7     |
| <b>91500 CA Run 1 (discordant)</b> |             |                    |             |      |                 |     |                |      |                |      |       |                 |       |                 |       |                  |       |         |
| 91500-2                            | 525403.3    | 691840             | 5351        | 2.72 | 14.917          | 8.1 | 1.686          | 25.0 | 0.18246        | 23.6 | 0.946 | 1080.4          | 235.3 | 1003.1          | 159.6 | 837.9            | 168.2 | -28.9   |
| 91500-3                            | 479703.7    | 631664             | 3834        | 2.65 | 14.106          | 2.3 | 1.679          | 3.4  | 0.17184        | 2.5  | 0.728 | 1022.2          | 23.6  | 1000.6          | 21.8  | 953.4            | 48.0  | -7.2    |
| 91500-9                            | 628569.1    | 827687             | 4448        | 2.62 | 14.073          | 1.9 | 1.669          | 3.0  | 0.17040        | 2.3  | 0.760 | 1014.3          | 21.1  | 996.8           | 18.8  | 958.3            | 39.3  | -5.9    |
| 91500-12                           | 470817.3    | 619962             | 3186        | 2.69 | 20.118          | 3.9 | 0.954          | 5.2  | 0.13929        | 3.5  | 0.671 | 840.6           | 27.5  | 680.3           | 25.8  | 180.2            | 90.0  | ####    |
| 91500-13                           | 574094.5    | 755956             | 90638       | 2.90 | 11.984          | 2.6 | 1.875          | 7.0  | 0.16306        | 6.5  | 0.930 | 973.8           | 58.5  | 1072.4          | 46.1  | 1278.8           | 50.0  | 23.9    |
| <b>91500 CA Run 2</b>              |             |                    |             |      |                 |     |                |      |                |      |       |                 |       |                 |       |                  |       |         |
| 91500 1                            | 755488      | 674370.94          | 40413       | 2.66 | 13.358          | 3.1 | 1.854          | 5.1  | 0.17969        | 4    | 0.782 | 1065.3          | 38.8  | 1064.8          | 33.4  | 1063.9           | 63.3  | -0.1    |
| 91500 11                           | 736217      | 657169.08          | 72735       | 2.55 | 13.54           | 2.1 | 1.841          | 4.4  | 0.18088        | 3.9  | 0.88  | 1071.8          | 38.3  | 1060.3          | 29    | 1036.6           | 42.3  | -3.4    |
| 91500 12                           | 806956      | 720312.8           | 55554       | 2.59 | 13.459          | 2.5 | 1.863          | 4.4  | 0.18197        | 3.7  | 0.823 | 1077.7          | 36.3  | 1068.2          | 29.4  | 1048.8           | 51    | -2.8    |
| 91500 13                           | 678492      | 605642.03          | 28300       | 2.57 | 13.604          | 2.8 | 1.842          | 4.8  | 0.18178        | 3.9  | 0.813 | 1076.7          | 38.6  | 1060.4          | 31.5  | 1027             | 56.4  | -4.8    |
| 91500 15                           | 726244      | 648266.88          | 131657      | 2.63 | 13.4            | 2.5 | 1.875          | 4.4  | 0.18228        | 3.7  | 0.824 | 1079.4          | 36.4  | 1072.2          | 29.4  | 1057.6           | 50.7  | -2.1    |
| 91500 16                           | 769404      | 686792.78          | 114132      | 2.54 | 13.28           | 2.9 | 1.883          | 5.2  | 0.18141        | 4.3  | 0.831 | 1074.7          | 42.8  | 1075            | 34.5  | 1075.6           | 58.1  | 0.1     |
| 91500 17                           | 618093      | 551728.1           | 32100       | 2.59 | 13.379          | 3   | 1.87           | 4.1  | 0.18151        | 2.8  | 0.684 | 1075.2          | 27.7  | 1070.5          | 27    | 1060.8           | 60    | -1.4    |
| 91500 18                           | 681604      | 608419.9           | 53963       | 2.6  | 13.5            | 1.9 | 1.859          | 5    | 0.18206        | 4.7  | 0.923 | 1078.2          | 46.2  | 1066.5          | 33.3  | 1042.6           | 39.2  | -3.4    |
| 91500 19                           | 745007      | 665015.29          | 68229       | 2.57 | 13.406          | 2.3 | 1.863          | 4.3  | 0.18125        | 3.6  | 0.84  | 1073.8          | 35.4  | 1068.2          | 28.1  | 1056.8           | 46.4  | -1.6    |
| 91500 2                            | 654499      | 584225.17          | 239932      | 2.59 | 13.322          | 2.2 | 1.856          | 3.8  | 0.17941        | 3.1  | 0.811 | 1063.8          | 30.5  | 1065.6          | 25.3  | 1069.3           | 45.2  | 0.5     |
| 91500 20                           | 738551      | 659252.47          | 215389      | 2.61 | 13.445          | 2.9 | 1.845          | 5    | 0.17995        | 4.1  | 0.817 | 1066.7          | 40.1  | 1061.5          | 32.9  | 1050.9           | 58    | -1.5    |
| 91500 21                           | 647918      | 578350.78          | 120776      | 2.54 | 13.49           | 2.7 | 1.859          | 4.6  | 0.18191        | 3.8  | 0.816 | 1077.4          | 37.4  | 1066.4          | 30.5  | 1044.1           | 53.9  | -3.2    |
| 91500 22                           | 559841      | 499730.64          | 663732      | 2.75 | 13.099          | 3.8 | 1.877          | 5.6  | 0.17844        | 4.1  | 0.73  | 1058.4          | 39.7  | 1073.2          | 37    | 1103.2           | 76.2  | 4.1     |
| 91500 23                           | 709738      | 633533.14          | 1487161     | 2.61 | 13.599          | 2.6 | 1.814          | 6    | 0.17903        | 5.4  | 0.9   | 1061.7          | 52.4  | 1050.7          | 39    | 1027.8           | 52.6  | -3.3    |

|                                    |        |           |         |      |        |     |        |     |         |     |       |        |      |        |      |        |      |      |
|------------------------------------|--------|-----------|---------|------|--------|-----|--------|-----|---------|-----|-------|--------|------|--------|------|--------|------|------|
| 91500 24                           | 626218 | 558980.72 | 124311  | 2.61 | 13.377 | 3   | 1.886  | 5   | 0.18304 | 4   | 0.796 | 1083.6 | 39.8 | 1076.1 | 33.2 | 1061   | 61   | -2.1 |
| 91500 25                           | 734369 | 655519.5  | 246803  | 2.68 | 13.318 | 2.4 | 1.848  | 4.4 | 0.17856 | 3.7 | 0.834 | 1059.1 | 35.9 | 1062.7 | 29   | 1069.9 | 48.8 | 1.0  |
| 91500 26                           | 835064 | 745402.83 | 179489  | 2.55 | 13.472 | 2.7 | 1.857  | 4.3 | 0.18149 | 3.3 | 0.78  | 1075.1 | 32.9 | 1065.8 | 28.1 | 1046.8 | 53.7 | -2.7 |
| 91500 27                           | 679941 | 606935.45 | 74513   | 2.67 | 13.636 | 2.9 | 1.827  | 3.8 | 0.18075 | 2.5 | 0.663 | 1071.1 | 25.1 | 1055.1 | 25.2 | 1022.2 | 58.2 | -4.8 |
| 91500 28                           | 803929 | 717610.81 | 54210   | 2.63 | 13.257 | 3.2 | 1.818  | 5   | 0.17487 | 3.8 | 0.77  | 1038.9 | 36.6 | 1051.9 | 32.4 | 1079.2 | 63.3 | 3.7  |
| 91500 29                           | 766901 | 684558.52 | 299682  | 2.54 | 13.311 | 3.3 | 1.857  | 4.7 | 0.17937 | 3.4 | 0.708 | 1063.5 | 32.9 | 1066   | 31.3 | 1071.1 | 67.2 | 0.7  |
| 91500 3                            | 622568 | 555722.62 | 109347  | 2.79 | 13.341 | 2.4 | 1.854  | 4.2 | 0.17943 | 3.4 | 0.821 | 1063.9 | 33.6 | 1064.7 | 27.5 | 1066.4 | 47.8 | 0.2  |
| 91500 30                           | 658123 | 587460.06 | 48440   | 2.62 | 13.309 | 3   | 1.858  | 4.8 | 0.1794  | 3.7 | 0.782 | 1063.7 | 36.6 | 1066.2 | 31.5 | 1071.3 | 59.7 | 0.7  |
| 91500 4                            | 643465 | 574375.9  | 3027465 | 2.6  | 13.374 | 2.2 | 1.886  | 4   | 0.18305 | 3.3 | 0.83  | 1083.6 | 33.3 | 1076.3 | 26.7 | 1061.4 | 45.1 | -2.1 |
| 91500 5                            | 796945 | 711376.69 | 87402   | 2.71 | 13.39  | 3.1 | 1.804  | 5.1 | 0.17529 | 4   | 0.796 | 1041.2 | 38.7 | 1047   | 33.1 | 1059.2 | 61.6 | 1.7  |
| 91500 6                            | 804832 | 718416.86 | 71895   | 2.65 | 13.313 | 2.5 | 1.822  | 4.4 | 0.17602 | 3.7 | 0.825 | 1045.2 | 35.3 | 1053.5 | 29   | 1070.7 | 50.3 | 2.4  |
| 91500 7                            | 689572 | 615532.37 | 407956  | 2.61 | 13.571 | 3.1 | 1.821  | 4.9 | 0.1793  | 3.8 | 0.778 | 1063.2 | 37.1 | 1053   | 31.9 | 1031.9 | 61.8 | -3.0 |
| 91500 8                            | 664998 | 593596.89 | 38420   | 2.59 | 13.446 | 1.9 | 1.853  | 4.3 | 0.1808  | 3.9 | 0.899 | 1071.3 | 38   | 1064.5 | 28.3 | 1050.7 | 37.8 | -2.0 |
| 91500 9                            | 729798 | 651439.29 | 95071   | 2.65 | 13.606 | 2.6 | 1.838  | 5.1 | 0.18145 | 4.4 | 0.863 | 1074.9 | 43.4 | 1059.1 | 33.4 | 1026.7 | 52   | -4.7 |
| <b>91500 CA Run 2 (discordant)</b> |        |           |         |      |        |     |        |     |         |     |       |        |      |        |      |        |      |      |
| 91500 10                           | 662761 | 591600    | 30656   | 2.55 | 13.712 | 3.5 | 1.8289 | 5.4 | 0.18196 | 4.1 | 0.762 | 1077.7 | 40.7 | 1055.9 | 35.3 | 1011   | 70.6 | -6.6 |
| 91500 14                           | 575445 | 513659    | 22736   | 2.75 | 13.717 | 3.3 | 1.87   | 5   | 0.18612 | 3.7 | 0.747 | 1100.3 | 37.7 | 1070.5 | 33   | 1010.3 | 67.3 | -8.9 |

**TABLE S10: FC1 LA-ICPMS U-Pb ZIRCON GEOCHRONOLOGY**

| Zircon #                            | Composition |                    |             |        |             |        |            |        |            |        |             | Ages            |         |                 |         |                 |         |         |
|-------------------------------------|-------------|--------------------|-------------|--------|-------------|--------|------------|--------|------------|--------|-------------|-----------------|---------|-----------------|---------|-----------------|---------|---------|
|                                     | U (238 cps) | U (norm) (238 cps) | 206Pb/204Pb | U/Th   | 206Pb/207Pb | 2σ (%) | 207Pb/235U | 2σ (%) | 206Pb/238U | 2σ (%) | Error Corr. | 206Pb/238U (Ma) | 2σ (Ma) | 207Pb/235U (Ma) | 2σ (Ma) | 206Pb/238U (Ma) | 2σ (Ma) | % Disc. |
| <b>FC1 no CA Run 1</b>              |             |                    |             |        |             |        |            |        |            |        |             |                 |         |                 |         |                 |         |         |
| FC1-11                              | 2235740     | 2557472            | 31761       | 1.73   | 13.305      | 1.6    | 1.9048     | 3.7    | 0.18389    | 3.3    | 0.899       | 1088.2          | 33.2    | 1082.8          | 24.5    | 1071.9          | 32.3    | -1.5    |
| FC1-12                              | 3475152     | 3975241            | 318394      | 2.04   | 12.932      | 1.8    | 1.9441     | 3.0    | 0.18242    | 2.4    | 0.802       | 1080.2          | 23.7    | 1096.4          | 19.9    | 1128.8          | 35.4    | 4.3     |
| FC1-13                              | 2170958     | 2483368            | 26223       | 1.71   | 12.980      | 2.0    | 1.9681     | 3.7    | 0.18536    | 3.0    | 0.830       | 1096.2          | 30.6    | 1104.7          | 24.6    | 1121.4          | 40.7    | 2.2     |
| FC1-14                              | 2971233     | 3398805            | 30198       | 1.65   | 13.093      | 1.8    | 1.9561     | 3.2    | 0.18584    | 2.6    | 0.826       | 1098.8          | 26.4    | 1100.6          | 21.2    | 1104.1          | 35.6    | 0.5     |
| FC1-15                              | 4044446     | 4626458            | 53851       | 1.39   | 12.761      | 2.5    | 1.9495     | 5.1    | 0.18051    | 4.5    | 0.872       | 1069.7          | 44.1    | 1098.3          | 34.4    | 1155.3          | 49.8    | 7.4     |
| FC1-16                              | 4002651     | 4578649            | 63839       | 1.72   | 13.074      | 1.9    | 1.9528     | 3.8    | 0.18524    | 3.3    | 0.866       | 1095.6          | 32.8    | 1099.4          | 25.2    | 1107.0          | 37.6    | 1.0     |
| FC1-17                              | 2357457     | 2696704            | 20204       | 1.28   | 13.106      | 1.8    | 1.9332     | 3.6    | 0.18384    | 3.1    | 0.860       | 1087.9          | 31.1    | 1092.6          | 24.1    | 1102.1          | 36.8    | 1.3     |
| FC1-21                              | 2669119     | 3053216            | 36493       | 1.62   | 13.173      | 1.6    | 1.9273     | 3.2    | 0.18422    | 2.8    | 0.864       | 1090.0          | 27.9    | 1090.6          | 21.6    | 1091.9          | 32.5    | 0.2     |
| FC1-22                              | 4375538     | 5005195            | 248861      | 1.80   | 13.091      | 1.8    | 1.9446     | 2.9    | 0.18471    | 2.3    | 0.782       | 1092.7          | 23.2    | 1096.6          | 19.8    | 1104.4          | 36.7    | 1.1     |
| FC1-23                              | 2254950     | 2579447            | 15855       | 1.64   | 13.154      | 2.3    | 1.9351     | 3.8    | 0.18469    | 2.9    | 0.780       | 1092.6          | 29.4    | 1093.3          | 25.1    | 1094.8          | 47.0    | 0.2     |
| FC1-24                              | 3561332     | 4073822            | 327238      | 2.45   | 13.210      | 1.6    | 1.9649     | 3.2    | 0.18834    | 2.8    | 0.866       | 1112.4          | 28.4    | 1103.6          | 21.6    | 1086.3          | 32.2    | -2.4    |
| FC1-26                              | 3172664     | 3629223            | 162029      | 1.75   | 12.905      | 1.6    | 1.8968     | 3.5    | 0.17761    | 3.2    | 0.896       | 1053.9          | 30.8    | 1080.0          | 23.5    | 1132.9          | 31.2    | 7.0     |
| FC1-27                              | 1412283     | 1615517            | 101999      | 1.94   | 13.167      | 2.3    | 2.0000     | 4.1    | 0.19108    | 3.4    | 0.826       | 1127.2          | 35.0    | 1115.5          | 27.7    | 1092.8          | 46.2    | -3.1    |
| FC1-28                              | 2050342     | 2345395            | 162002      | 1.99   | 13.274      | 2.3    | 1.9478     | 3.6    | 0.18761    | 2.8    | 0.776       | 1108.4          | 28.3    | 1097.7          | 24.0    | 1076.5          | 45.3    | -3.0    |
| FC1-29                              | 3944821     | 4512497            | 30241       | 1.45   | 12.857      | 2.1    | 1.8497     | 4.2    | 0.17256    | 3.6    | 0.866       | 1026.2          | 34.6    | 1063.3          | 27.8    | 1140.3          | 41.9    | 10.0    |
| FC1-3                               | 3335188     | 3815135            | 35829       | 1.84   | 13.282      | 1.9    | 1.8593     | 4.7    | 0.17918    | 4.3    | 0.920       | 1062.5          | 42.6    | 1066.7          | 31.2    | 1075.5          | 37.1    | 1.2     |
| FC1-30                              | 4302837     | 4922033            | 56192       | 2.32   | 13.145      | 1.9    | 1.9059     | 3.1    | 0.18178    | 2.5    | 0.798       | 1076.7          | 24.6    | 1083.2          | 20.7    | 1096.2          | 37.6    | 1.8     |
| FC1-4                               | 3022444     | 3457386            | 20308       | 1.70   | 13.351      | 2.1    | 1.8882     | 3.2    | 0.18292    | 2.4    | 0.755       | 1082.9          | 23.8    | 1077.0          | 21.0    | 1065.0          | 41.6    | -1.7    |
| FC1-5                               | 793161.6    | 907301             | 149727      | 3.24   | 12.816      | 3.1    | 1.9178     | 4.4    | 0.17833    | 3.2    | 0.721       | 1057.8          | 31.1    | 1087.3          | 29.5    | 1146.8          | 60.8    | 7.8     |
| FC1-7                               | 11061421    | 12653205           | 69338       | 1.75   | 13.096      | 1.9    | 1.9857     | 3.0    | 0.18868    | 2.4    | 0.790       | 1114.2          | 24.5    | 1110.6          | 20.5    | 1103.6          | 37.2    | -1.0    |
| FC1-8                               | 1455125     | 1664524            | 56009       | 2.69   | 13.242      | 1.9    | 1.9632     | 3.4    | 0.18864    | 2.8    | 0.828       | 1114.0          | 28.8    | 1103.0          | 22.9    | 1081.4          | 38.3    | -3.0    |
| <b>FC1 no CA Run 1 (discordant)</b> |             |                    |             |        |             |        |            |        |            |        |             |                 |         |                 |         |                 |         |         |
| FC1-10                              | 2491333     | 2849846            | 17033       | 1.74   | 13.195      | 2.2    | 2.0680     | 4.1    | 0.19800    | 3.5    | 0.847       | 1164.5          | 36.8    | 1138.3          | 27.9    | 1088.5          | 43.4    | -7.0    |
| FC1-2                               | 1802401     | 2061774            | 11929       | 1.98   | 13.533      | 1.7    | 1.9200     | 4.7    | 0.18854    | 4.4    | 0.930       | 1113.5          | 44.8    | 1088.1          | 31.4    | 1037.6          | 35.0    | -7.3    |
| FC1-6                               | 1508835     | 1725962            | 9258        | 1.37   | 13.531      | 3.4    | 1.9290     | 5.6    | 0.18940    | 4.4    | 0.791       | 1118.1          | 45.6    | 1091.2          | 37.6    | 1037.9          | 69.4    | -7.7    |
| FC1-xx                              | 1334348     | 1526366            | 20613       | 110.26 | 12.958      | 2.3    | 2.6138     | 4.1    | 0.24575    | 3.4    | 0.823       | 1416.5          | 43.2    | 1304.5          | 30.3    | 1124.8          | 46.7    | -25.9   |
| FC1-xx                              | 904756.4    | 1034955            | 18906       | 118.25 | 13.395      | 1.7    | 2.6175     | 3.5    | 0.25440    | 3.1    | 0.877       | 1461.1          | 39.9    | 1305.6          | 25.6    | 1058.3          | 33.6    | -38.1   |
| FC1-xx                              | 3503655     | 4007845            | 88331       | 151.70 | 12.814      | 1.6    | 2.4027     | 3.3    | 0.22340    | 2.9    | 0.881       | 1299.8          | 34.6    | 1243.4          | 23.9    | 1147.0          | 31.4    | -13.3   |
| FC1-xx                              | 1222450     | 1398366            | 20930       | 99.47  | 13.216      | 1.6    | 2.5146     | 3.7    | 0.24113    | 3.3    | 0.898       | 1392.5          | 41.2    | 1276.3          | 26.6    | 1085.4          | 32.4    | -28.3   |
| FC1-xx                              | 1137221     | 1300871            | 15113       | 113.04 | 12.388      | 4.8    | 2.5189     | 6.7    | 0.22642    | 4.6    | 0.691       | 1315.7          | 54.7    | 1277.5          | 48.4    | 1213.8          | 94.8    | -8.4    |
| FC1-xx                              | 2098826     | 2400855            | 63086       | 1.96   | 11.895      | 5.7    | 2.2792     | 6.8    | 0.19672    | 3.6    | 0.534       | 1157.7          | 38.3    | 1205.9          | 47.8    | 1293.2          | 111.3   | 10.5    |
| <b>FC1 no CA Run 2</b>              |             |                    |             |        |             |        |            |        |            |        |             |                 |         |                 |         |                 |         |         |
| FC 1                                | 6122289     | 5759983.7          | 2.4E+07     | 1.65   | 13.093      | 2.2    | 1.9519     | 3.4    | 0.18543    | 2.6    | 0.761       | 1096.6          | 26      | 1099.1          | 22.8    | 1104.1          | 44.2    | 0.7     |
| FC 11                               | 3897116     | 3666492.2          | 353223      | 2.26   | 13.227      | 1.7    | 1.9467     | 2.9    | 0.18683    | 2.4    | 0.822       | 1104.2          | 24      | 1097.3          | 19.6    | 1083.6          | 33.3    | -1.9    |
| FC 12                               | 3810510     | 3585011.3          | 417199      | 1.53   | 13.117      | 2.3    | 1.9463     | 3.7    | 0.18524    | 2.8    | 0.768       | 1095.5          | 28      | 1097.2          | 24.5    | 1100.4          | 46.8    | 0.4     |
| FC 13                               | 9225310     | 8679373.9          | 1239632     | 1.84   | 13.028      | 1.6    | 1.9769     | 2.7    | 0.18688    | 2.1    | 0.789       | 1104.4          | 21      | 1107.7          | 17.9    | 1114            | 32.5    | 0.9     |
| FC 15                               | 10435250    | 9817712            | 1101423     | 1.6    | 13.014      | 1.8    | 1.9797     | 2.8    | 0.18694    | 2.1    | 0.769       | 1104.8          | 22      | 1108.6          | 18.8    | 1116.2          | 35.6    | 1.0     |
| FC 16                               | 1597053     | 1502542.5          | 202949      | 2.48   | 13.085      | 2      | 1.9587     | 3.5    | 0.18596    | 2.8    | 0.822       | 1099.5          | 29      | 1101.4          | 23.3    | 1105.3          | 39.3    | 0.5     |

|       |          |           |         |      |        |     |        |     |         |     |       |        |    |        |      |        |      |      |
|-------|----------|-----------|---------|------|--------|-----|--------|-----|---------|-----|-------|--------|----|--------|------|--------|------|------|
| FC 17 | 9030006  | 8495627.6 | 592597  | 1.89 | 13.203 | 1.6 | 1.9627 | 2.6 | 0.18803 | 2.1 | 0.801 | 1110.7 | 22 | 1102.8 | 17.8 | 1087.3 | 31.8 | -2.2 |
| FC 18 | 3471332  | 3265905.2 | 351347  | 1.83 | 13.197 | 1.8 | 1.9236 | 3.1 | 0.1842  | 2.5 | 0.823 | 1089.9 | 26 | 1089.3 | 20.7 | 1088.2 | 35.2 | -0.2 |
| FC 19 | 8638256  | 8127060.6 | 590751  | 1.94 | 13.031 | 1.4 | 1.9499 | 2.6 | 0.18437 | 2.2 | 0.83  | 1090.8 | 22 | 1098.4 | 17.4 | 1113.5 | 28.9 | 2.0  |
| FC 2  | 2888932  | 2717970.6 | 356446  | 1.64 | 13.215 | 2   | 1.9438 | 3.1 | 0.18639 | 2.3 | 0.748 | 1101.8 | 23 | 1096.3 | 20.5 | 1085.5 | 40.6 | -1.5 |
| FC 20 | 3581091  | 3369168.9 | 1307488 | 2.16 | 13.189 | 1.7 | 1.9604 | 3.2 | 0.1876  | 2.7 | 0.846 | 1108.3 | 28 | 1102   | 21.8 | 1089.5 | 34.6 | -1.7 |
| FC 21 | 11430502 | 10754067  | 1939955 | 1.57 | 13.07  | 1.5 | 1.9884 | 2.8 | 0.18858 | 2.3 | 0.85  | 1113.7 | 24 | 1111.6 | 18.6 | 1107.5 | 29   | -0.6 |
| FC 22 | 4657708  | 4382073.8 | 5136523 | 1.85 | 13.225 | 2.3 | 1.9269 | 3.3 | 0.1849  | 2.3 | 0.709 | 1093.7 | 23 | 1090.5 | 21.8 | 1084   | 46   | -0.9 |
| FC 23 | 2332782  | 2194732.4 | 273305  | 2.04 | 13.171 | 2.9 | 1.9228 | 4.6 | 0.18375 | 3.5 | 0.771 | 1087.4 | 35 | 1089   | 30.7 | 1092.2 | 58.6 | 0.4  |
| FC 24 | 12675443 | 11925335  | 1280901 | 1.3  | 13.054 | 1.9 | 1.9712 | 2.8 | 0.18671 | 2.1 | 0.736 | 1103.5 | 21 | 1105.7 | 19.1 | 1110   | 38.2 | 0.6  |
| FC 25 | 5022353  | 4725139.8 | 1315814 | 1.67 | 12.981 | 2.1 | 1.9744 | 3.1 | 0.18596 | 2.3 | 0.728 | 1099.5 | 23 | 1106.8 | 21   | 1121.3 | 42.6 | 1.9  |
| FC 27 | 6022410  | 5666015.3 | 422364  | 1.67 | 13.107 | 2.2 | 1.9204 | 3.5 | 0.18264 | 2.8 | 0.784 | 1081.4 | 27 | 1088.2 | 23.4 | 1101.9 | 43.5 | 1.9  |
| FC 28 | 5292827  | 4979607.7 | 889929  | 1.89 | 13.125 | 1.9 | 1.985  | 3   | 0.18903 | 2.4 | 0.786 | 1116.1 | 24 | 1110.4 | 20.4 | 1099.2 | 37.4 | -1.5 |
| FC 29 | 9449935  | 8890706   | 3823474 | 1.19 | 13.136 | 2.3 | 1.9977 | 3.5 | 0.1904  | 2.6 | 0.746 | 1123.6 | 27 | 1114.7 | 23.8 | 1097.5 | 46.9 | -2.4 |
| FC 3  | 3113550  | 2929296.1 | 3792871 | 1.64 | 13.266 | 2.3 | 1.9426 | 3.2 | 0.18699 | 2.2 | 0.7   | 1105   | 23 | 1095.9 | 21.2 | 1077.7 | 45.4 | -2.5 |
| FC 30 | 3486587  | 3280257.5 | 191514  | 1.76 | 13.116 | 1.9 | 1.9255 | 3.2 | 0.18324 | 2.6 | 0.816 | 1084.7 | 26 | 1090   | 21.6 | 1100.6 | 37.3 | 1.4  |
| FC 31 | 1470791  | 1383752.4 | 133579  | 3.18 | 13.205 | 2.3 | 1.9386 | 3.7 | 0.18574 | 2.9 | 0.782 | 1098.3 | 30 | 1094.5 | 25   | 1087   | 46.6 | -1.0 |
| FC 32 | 2443449  | 2298850.4 | 2057891 | 1.82 | 13.216 | 1.7 | 1.9157 | 3.5 | 0.18371 | 3.1 | 0.88  | 1087.2 | 31 | 1086.6 | 23.2 | 1085.3 | 33.1 | -0.2 |
| FC 33 | 3243781  | 3051820.3 | 163465  | 1.76 | 13.191 | 2.2 | 1.9199 | 3.3 | 0.18375 | 2.5 | 0.762 | 1087.4 | 25 | 1088   | 22.2 | 1089.2 | 43.1 | 0.2  |
| FC 34 | 4623834  | 4350204.4 | 335965  | 1.9  | 12.997 | 1.6 | 1.9158 | 2.7 | 0.18068 | 2.2 | 0.818 | 1070.7 | 22 | 1086.6 | 18.3 | 1118.7 | 31.5 | 4.3  |
| FC 35 | 3155436  | 2968703.4 | 412106  | 1.84 | 13.237 | 2.1 | 1.9622 | 3.2 | 0.18846 | 2.4 | 0.75  | 1113   | 24 | 1102.6 | 21.2 | 1082.2 | 41.9 | -2.8 |
| FC 36 | 5111810  | 4809302.9 | 242304  | 2.48 | 13.114 | 2.1 | 1.9584 | 3.5 | 0.18635 | 2.9 | 0.809 | 1101.6 | 29 | 1101.3 | 23.8 | 1100.8 | 41.7 | -0.1 |
| FC 37 | 10674770 | 10043058  | 1059187 | 1.38 | 13.032 | 1.5 | 1.9694 | 3   | 0.18622 | 2.6 | 0.864 | 1100.9 | 27 | 1105.1 | 20.5 | 1113.4 | 30.6 | 1.1  |
| FC 38 | 2718465  | 2557591.5 | 107688  | 2.41 | 13.146 | 2.3 | 1.9451 | 3.5 | 0.18553 | 2.7 | 0.761 | 1097.1 | 27 | 1096.8 | 23.7 | 1096   | 46   | -0.1 |
| FC 39 | 10881942 | 10237970  | 516430  | 1.64 | 13.1   | 1.6 | 1.9606 | 2.4 | 0.18635 | 1.9 | 0.764 | 1101.6 | 19 | 1102.1 | 16.3 | 1103   | 31.4 | 0.1  |
| FC 4  | 2763009  | 2599499.4 | 779526  | 1.71 | 13.094 | 1.9 | 1.9453 | 3.1 | 0.18482 | 2.5 | 0.785 | 1093.2 | 25 | 1096.8 | 21   | 1104   | 38.9 | 1.0  |
| FC 41 | 3615413  | 3401459.8 | 514881  | 3.45 | 13.101 | 2.2 | 1.9829 | 3.5 | 0.18848 | 2.6 | 0.76  | 1113.2 | 27 | 1109.7 | 23.3 | 1102.9 | 44.9 | -0.9 |
| FC 42 | 4583428  | 4312189.5 | 1573919 | 2.19 | 13.26  | 1.8 | 1.9546 | 3   | 0.18805 | 2.4 | 0.794 | 1110.8 | 24 | 1100   | 20.2 | 1078.7 | 36.7 | -3.0 |
| FC 43 | 18432818 | 17341999  | 1E+07   | 1.26 | 12.808 | 1.9 | 2.0374 | 2.6 | 0.18935 | 1.8 | 0.693 | 1117.8 | 19 | 1128.1 | 17.9 | 1147.9 | 37.5 | 2.6  |
| FC 44 | 4703060  | 4424741.9 | 340495  | 1.96 | 13.102 | 2.2 | 1.9543 | 3.6 | 0.18578 | 2.9 | 0.804 | 1098.5 | 30 | 1099.9 | 24.4 | 1102.7 | 43.2 | 0.4  |
| FC 45 | 10933155 | 10286152  | 536074  | 1.95 | 12.963 | 1.4 | 2.011  | 2.9 | 0.18916 | 2.5 | 0.874 | 1116.8 | 26 | 1119.2 | 19.7 | 1123.9 | 28.1 | 0.6  |
| FC 46 | 3189218  | 3000486.2 | 167369  | 1.84 | 13.26  | 2.7 | 1.9291 | 4.5 | 0.18561 | 3.6 | 0.801 | 1097.6 | 36 | 1091.2 | 29.8 | 1078.7 | 53.5 | -1.8 |
| FC 47 | 2037804  | 1917210.7 | 155761  | 1.97 | 13.155 | 2.1 | 1.9162 | 3.6 | 0.1829  | 3   | 0.825 | 1082.8 | 30 | 1086.8 | 24.3 | 1094.6 | 41.3 | 1.1  |
| FC 48 | 1591298  | 1497128   | 149085  | 3.18 | 13.224 | 1.9 | 1.932  | 3.6 | 0.18538 | 3.1 | 0.85  | 1096.3 | 31 | 1092.2 | 24.2 | 1084.1 | 38.2 | -1.1 |
| FC 49 | 1978282  | 1861211.1 | 303002  | 2.79 | 13.228 | 1.8 | 1.9185 | 2.9 | 0.18414 | 2.3 | 0.783 | 1089.5 | 23 | 1087.5 | 19.3 | 1083.5 | 36   | -0.6 |
| FC 50 | 3212303  | 3022205.1 | 929570  | 1.71 | 12.941 | 2.1 | 1.965  | 2.8 | 0.18451 | 1.9 | 0.666 | 1091.5 | 19 | 1103.6 | 19.1 | 1127.4 | 42.2 | 3.2  |
| FC 51 | 3985364  | 3749517.8 | 380624  | 1.98 | 13.08  | 1.9 | 1.965  | 2.8 | 0.18649 | 2   | 0.738 | 1102.4 | 21 | 1103.6 | 18.5 | 1106   | 37.2 | 0.3  |
| FC 52 | 1864858  | 1754499.3 | 138310  | 2.1  | 12.938 | 2.2 | 1.9843 | 3   | 0.18629 | 2.1 | 0.699 | 1101.2 | 21 | 1110.2 | 20.4 | 1127.8 | 43   | 2.4  |
| FC 54 | 9479296  | 8918329.5 | 1414586 | 1.14 | 12.872 | 1.6 | 1.9779 | 2.6 | 0.18473 | 2   | 0.792 | 1092.8 | 20 | 1108   | 17.3 | 1138   | 31.1 | 4.0  |
| FC 58 | 1564306  | 1471733.4 | 254765  | 2.38 | 13.215 | 2.2 | 1.9418 | 3.8 | 0.1862  | 3.1 | 0.807 | 1100.7 | 31 | 1095.6 | 25.4 | 1085.4 | 44.8 | -1.4 |
| FC 59 | 4525774  | 4257947.4 | 1207841 | 1.83 | 13.152 | 2.1 | 1.9424 | 3.8 | 0.18536 | 3.1 | 0.825 | 1096.2 | 32 | 1095.8 | 25.4 | 1095.1 | 42.9 | -0.1 |
| FC 6  | 10962406 | 10313672  | 1537186 | 1.63 | 13.012 | 2.2 | 1.9989 | 3.4 | 0.18873 | 2.6 | 0.772 | 1114.5 | 27 | 1115.1 | 23   | 1116.5 | 43   | 0.2  |
| FC 60 | 4745990  | 4465131.4 | 352789  | 2.59 | 13.149 | 1.9 | 1.9391 | 3.5 | 0.18501 | 3   | 0.842 | 1094.3 | 30 | 1094.7 | 23.7 | 1095.5 | 38.2 | 0.1  |
| FC 61 | 4032072  | 3793461.7 | 2172047 | 1.98 | 13.129 | 2.2 | 1.9264 | 3.6 | 0.18352 | 2.9 | 0.806 | 1086.2 | 29 | 1090.3 | 24.3 | 1098.5 | 43   | 1.1  |

|       |          |           |         |      |        |     |        |     |         |     |       |        |    |        |      |        |      |      |
|-------|----------|-----------|---------|------|--------|-----|--------|-----|---------|-----|-------|--------|----|--------|------|--------|------|------|
| FC 62 | 6924477  | 6514699.8 | 321019  | 1.91 | 13.06  | 2.1 | 1.9611 | 3   | 0.18584 | 2.1 | 0.694 | 1098.8 | 21 | 1102.2 | 20   | 1109   | 42.8 | 0.9  |
| FC 63 | 3946456  | 3712912.3 | 1438619 | 1.94 | 13.051 | 1.7 | 1.9828 | 2.7 | 0.18776 | 2.1 | 0.777 | 1109.2 | 22 | 1109.7 | 18.3 | 1110.5 | 34.2 | 0.1  |
| FC 64 | 6231078  | 5862334.8 | 348000  | 2.05 | 13.141 | 1.7 | 1.9604 | 3.3 | 0.18693 | 2.8 | 0.849 | 1104.7 | 28 | 1102   | 22.1 | 1096.7 | 34.8 | -0.7 |
| FC 65 | 9586349  | 9019047.3 | 2211375 | 1.17 | 13.105 | 2   | 1.9541 | 3.3 | 0.18581 | 2.6 | 0.799 | 1098.6 | 27 | 1099.9 | 22.2 | 1102.3 | 39.7 | 0.3  |
| FC 66 | 4692312  | 4414630   | 1546568 | 2    | 13.198 | 2.1 | 1.9389 | 3.4 | 0.18568 | 2.7 | 0.788 | 1097.9 | 27 | 1094.6 | 22.6 | 1088.1 | 41.6 | -0.9 |
| FC 67 | 2421122  | 2277844.7 | 243071  | 1.74 | 13.15  | 1.9 | 1.9316 | 3.5 | 0.1843  | 3   | 0.847 | 1090.4 | 30 | 1092.1 | 23.4 | 1095.4 | 37.2 | 0.5  |
| FC 68 | 4741829  | 4461216.7 | 646144  | 1.78 | 13.156 | 1.8 | 1.9595 | 3.2 | 0.18704 | 2.6 | 0.825 | 1105.3 | 26 | 1101.7 | 21.2 | 1094.5 | 35.7 | -1.0 |
| FC 69 | 8095873  | 7616774.8 | 2E+07   | 1.41 | 12.99  | 1.9 | 1.9643 | 3.4 | 0.18514 | 2.8 | 0.83  | 1095   | 28 | 1103.3 | 22.6 | 1119.8 | 37.3 | 2.2  |
| FC 7  | 4400676  | 4140252.4 | 567971  | 2.11 | 13.164 | 1.7 | 1.925  | 2.5 | 0.18387 | 1.7 | 0.711 | 1088.1 | 18 | 1089.8 | 16.4 | 1093.2 | 34.5 | 0.5  |
| FC 70 | 3906224  | 3675061.2 | 172283  | 2.5  | 12.949 | 1.9 | 1.9539 | 2.8 | 0.18358 | 2.1 | 0.727 | 1086.5 | 21 | 1099.8 | 19.1 | 1126.1 | 38.9 | 3.5  |
| FC 71 | 8472991  | 7971575.7 | 1021575 | 1.7  | 13.232 | 1.8 | 1.9466 | 2.7 | 0.18689 | 2   | 0.747 | 1104.5 | 21 | 1097.3 | 18.1 | 1082.9 | 36   | -2.0 |
| FC 73 | 3340134  | 3142471.3 | 189979  | 2.46 | 13.227 | 1.9 | 1.9306 | 3.3 | 0.1853  | 2.7 | 0.821 | 1095.8 | 27 | 1091.8 | 21.8 | 1083.6 | 37.2 | -1.1 |
| FC 74 | 3063869  | 2882555.1 | 392456  | 2.29 | 13.157 | 1.8 | 1.9232 | 3.3 | 0.18361 | 2.8 | 0.835 | 1086.6 | 28 | 1089.2 | 22.3 | 1094.3 | 36.7 | 0.7  |
| FC 75 | 2669219  | 2511259.7 | 113229  | 1.6  | 13.232 | 1.7 | 1.947  | 3   | 0.18694 | 2.4 | 0.811 | 1104.8 | 24 | 1097.4 | 19.8 | 1082.8 | 34.6 | -2.0 |
| FC 76 | 1506908  | 1417732.1 | 90357   | 2.4  | 13.136 | 2.4 | 1.9561 | 4.3 | 0.18644 | 3.5 | 0.828 | 1102.1 | 36 | 1100.5 | 28.8 | 1097.5 | 48.1 | -0.4 |
| FC 77 | 4310985  | 4055869.2 | 361980  | 2.06 | 12.978 | 1.8 | 1.9568 | 3.1 | 0.18426 | 2.5 | 0.815 | 1090.2 | 25 | 1100.8 | 20.9 | 1121.7 | 35.9 | 2.8  |
| FC 78 | 10547405 | 9923229.8 | 349784  | 1.56 | 13.171 | 1.9 | 1.9714 | 3   | 0.1884  | 2.3 | 0.766 | 1112.7 | 24 | 1105.8 | 20.3 | 1092.2 | 38.7 | -1.9 |
| FC 79 | 1225904  | 1153357.4 | 122095  | 3.37 | 13.022 | 1.9 | 1.934  | 3.5 | 0.18274 | 2.9 | 0.832 | 1081.9 | 29 | 1092.9 | 23.3 | 1114.9 | 38.5 | 3.0  |
| FC 8  | 5538042  | 5210311.3 | 616773  | 1.8  | 13.173 | 2.7 | 1.9629 | 3.7 | 0.18763 | 2.6 | 0.683 | 1108.5 | 26 | 1102.9 | 25.2 | 1091.8 | 54.8 | -1.5 |
| FC 80 | 1026772  | 966009.61 | 45070   | 2.43 | 13.457 | 2.6 | 1.8963 | 3.6 | 0.18517 | 2.6 | 0.71  | 1095.1 | 26 | 1079.8 | 24.2 | 1049   | 51.7 | -4.4 |
| FC 81 | 7855586  | 7390707.5 | 639311  | 1.89 | 13.188 | 1.8 | 1.9716 | 2.9 | 0.18866 | 2.3 | 0.797 | 1114.1 | 24 | 1105.8 | 19.8 | 1089.6 | 35.5 | -2.2 |
| FC 82 | 2340465  | 2201960.8 | 97569   | 1.75 | 13.217 | 2.1 | 1.9355 | 3.2 | 0.18562 | 2.4 | 0.743 | 1097.6 | 24 | 1093.5 | 21.2 | 1085.2 | 42.5 | -1.1 |
| FC 84 | 1878469  | 1767304.8 | 1275760 | 2.64 | 13.228 | 2.2 | 1.9225 | 3.7 | 0.18453 | 3   | 0.808 | 1091.7 | 30 | 1088.9 | 24.5 | 1083.5 | 43.2 | -0.8 |
| FC 86 | 4114813  | 3871306.3 | 946270  | 2.14 | 13.054 | 1.8 | 1.9436 | 2.9 | 0.18409 | 2.2 | 0.771 | 1089.3 | 22 | 1096.2 | 19.4 | 1110   | 36.8 | 1.9  |
| FC 87 | 3550261  | 3340163.4 | 880293  | 2.36 | 13.172 | 2.2 | 1.9281 | 3.5 | 0.18428 | 2.7 | 0.78  | 1090.3 | 27 | 1090.9 | 23.2 | 1092   | 43.4 | 0.2  |
| FC 9  | 6293328  | 5920900.9 | 444911  | 1.56 | 13.099 | 3   | 2.0014 | 3.7 | 0.19021 | 2.2 | 0.583 | 1122.5 | 22 | 1116   | 25.2 | 1103.2 | 60.6 | -1.7 |

**FC1 no CA Run 2 (discordant)**

|       |         |           |        |        |        |     |        |     |         |     |       |        |    |        |      |        |      |       |
|-------|---------|-----------|--------|--------|--------|-----|--------|-----|---------|-----|-------|--------|----|--------|------|--------|------|-------|
| FC 10 | 1241324 | 1167864.8 | 174466 | 105.88 | 13.247 | 2.6 | 2.4587 | 4.7 | 0.23632 | 3.9 | 0.835 | 1367.6 | 48 | 1260   | 33.6 | 1080.7 | 51.5 | -26.5 |
| FC 14 | 1481206 | 1393551.1 | 211875 | 131.81 | 12.945 | 2.2 | 2.5026 | 6.5 | 0.23508 | 6.1 | 0.940 | 1361.1 | 75 | 1272.8 | 47   | 1126.7 | 44.1 | -20.8 |
| FC 26 | 2958719 | 2783627.7 | 154730 | 132.73 | 13.117 | 3.3 | 2.4378 | 5.1 | 0.23202 | 3.8 | 0.755 | 1345.1 | 46 | 1253.8 | 36.4 | 1100.4 | 66.4 | -22.2 |
| FC 40 | 1965407 | 1849098   | 361541 | 92.61  | 13.037 | 3.1 | 2.5049 | 4.4 | 0.23696 | 3.2 | 0.725 | 1370.9 | 40 | 1273.5 | 32.2 | 1112.6 | 61   | -23.2 |
| FC 5  | 1332628 | 1253765.6 | 324170 | 127.10 | 13.01  | 2.8 | 2.3964 | 4.6 | 0.22622 | 3.6 | 0.795 | 1314.7 | 43 | 1241.5 | 32.8 | 1116.8 | 55.4 | -17.7 |
| FC 53 | 1516884 | 1427117.7 | 151125 | 95.15  | 13.1   | 1.8 | 2.3763 | 3.9 | 0.22588 | 3.5 | 0.885 | 1312.9 | 41 | 1235.5 | 28.1 | 1103   | 36.6 | -19.0 |
| FC 55 | 3823953 | 3597658.8 | 559087 | 1.24   | 13.109 | 2.6 | 2.109  | 3.9 | 0.20061 | 3   | 0.759 | 1178.6 | 32 | 1151.8 | 27   | 1101.6 | 51.1 | -7.0  |
| FC 56 | 1316115 | 1238229.8 | 104748 | 127.42 | 13.343 | 2.9 | 2.3043 | 5.8 | 0.22309 | 5.1 | 0.872 | 1298.2 | 60 | 1213.6 | 41.4 | 1066.1 | 57.7 | -21.8 |
| FC 57 | 4140266 | 3895253   | 381975 | 1.30   | 13.161 | 2.3 | 2.0484 | 4   | 0.19561 | 3.3 | 0.828 | 1151.7 | 35 | 1131.8 | 27.6 | 1093.7 | 45.4 | -5.3  |
| FC 72 | 1893874 | 1781798.2 | 75367  | 126.50 | 13.414 | 2.3 | 2.4528 | 7   | 0.23873 | 6.6 | 0.945 | 1380.1 | 82 | 1258.3 | 50.2 | 1055.5 | 46   | -30.8 |
| FC 83 | 1463386 | 1376785.6 | 105777 | 162.40 | 13.154 | 2.8 | 2.4585 | 4   | 0.23465 | 2.8 | 0.705 | 1358.8 | 35 | 1259.9 | 28.9 | 1094.8 | 56.8 | -24.1 |
| FC 85 | 1241710 | 1168228   | 101240 | 93.13  | 12.782 | 4.5 | 2.4775 | 6.2 | 0.22977 | 4.3 | 0.689 | 1333.3 | 51 | 1265.5 | 44.8 | 1152   | 89.1 | -15.7 |

**Composition**

**Ages**

| Zircon # | U (238 cps) | U (norm) (238 cps) | 206Pb/204Pb | U/Th | 206Pb/207Pb (%) | 2σ | 207Pb/235U (%) | 2σ | 206Pb/238U (%) | 2σ | Error Corr. | 206Pb/238U (Ma) | 2σ | 207Pb/235U (Ma) | 2σ | 206Pb/207Pb (Ma) | 2σ | % Disc. |
|----------|-------------|--------------------|-------------|------|-----------------|----|----------------|----|----------------|----|-------------|-----------------|----|-----------------|----|------------------|----|---------|
|----------|-------------|--------------------|-------------|------|-----------------|----|----------------|----|----------------|----|-------------|-----------------|----|-----------------|----|------------------|----|---------|

**FC1 CA Run 1**

|        |          |         |        |      |        |     |       |     |         |     |       |        |      |        |      |        |      |      |
|--------|----------|---------|--------|------|--------|-----|-------|-----|---------|-----|-------|--------|------|--------|------|--------|------|------|
| FC1-2  | 1578327  | 2078308 | 9427   | 2.03 | 13.176 | 2.1 | 1.965 | 3.6 | 0.18789 | 2.9 | 0.813 | 1109.9 | 29.7 | 1103.7 | 24.1 | 1091.5 | 41.7 | -1.7 |
| FC1-3  | 1270304  | 1672709 | 17295  | 1.91 | 13.296 | 2.3 | 1.819 | 5.3 | 0.17550 | 4.8 | 0.898 | 1042.3 | 45.9 | 1052.4 | 34.8 | 1073.3 | 47.0 | 2.9  |
| FC1-4  | 1244386  | 1638581 | 17632  | 1.95 | 13.123 | 2.2 | 1.986 | 3.9 | 0.18911 | 3.2 | 0.820 | 1116.6 | 32.9 | 1110.8 | 26.4 | 1099.6 | 44.8 | -1.5 |
| FC1-28 | 2955933  | 3892310 | 37041  | 1.87 | 13.058 | 1.5 | 1.952 | 2.8 | 0.18495 | 2.4 | 0.857 | 1094.0 | 24.5 | 1099.2 | 19.1 | 1109.4 | 29.3 | 1.4  |
| FC1-29 | 3564697  | 4693917 | 568400 | 1.92 | 12.971 | 1.8 | 1.942 | 3.5 | 0.18280 | 3.0 | 0.859 | 1082.3 | 29.8 | 1095.8 | 23.4 | 1122.8 | 35.6 | 3.6  |
| FC1-5  | 1244386  | 1638581 | 26456  | 1.51 | 13.085 | 2.2 | 1.919 | 3.9 | 0.18222 | 3.1 | 0.815 | 1079.1 | 31.3 | 1087.8 | 25.8 | 1105.4 | 44.8 | 2.4  |
| FC1-10 | 2116904  | 2787494 | 34164  | 1.63 | 12.987 | 2.0 | 1.926 | 4.3 | 0.18148 | 3.8 | 0.886 | 1075.1 | 37.9 | 1090.1 | 28.9 | 1120.3 | 40.0 | 4.0  |
| FC1-11 | 1418527  | 1867886 | 262810 | 2.04 | 12.981 | 2.0 | 1.995 | 3.5 | 0.18791 | 2.8 | 0.818 | 1110.1 | 28.9 | 1113.8 | 23.4 | 1121.3 | 39.8 | 1.0  |
| FC1-6  | 3635937  | 4787725 | 111205 | 1.96 | 13.074 | 1.7 | 1.931 | 4.1 | 0.18315 | 3.7 | 0.913 | 1084.1 | 37.4 | 1091.8 | 27.4 | 1107.0 | 33.5 | 2.1  |
| FC1-12 | 1669152  | 2197905 | 19230  | 1.90 | 13.338 | 2.2 | 1.891 | 3.8 | 0.18297 | 3.1 | 0.824 | 1083.2 | 31.2 | 1077.8 | 25.2 | 1067.0 | 43.2 | -1.5 |
| FC1-13 | 1403475  | 1848066 | 14075  | 2.07 | 13.137 | 2.5 | 1.974 | 4.5 | 0.18820 | 3.8 | 0.836 | 1111.6 | 38.6 | 1106.8 | 30.5 | 1097.4 | 49.7 | -1.3 |
| FC1-26 | 2471792  | 3254803 | 37389  | 1.88 | 13.122 | 1.7 | 1.854 | 3.1 | 0.17656 | 2.6 | 0.830 | 1048.2 | 25.2 | 1065.0 | 20.7 | 1099.6 | 35.0 | 4.7  |
| FC1-14 | 3549228  | 4673549 | 47581  | 1.86 | 13.169 | 1.7 | 1.932 | 3.6 | 0.18457 | 3.1 | 0.885 | 1091.9 | 31.6 | 1092.1 | 23.8 | 1092.5 | 33.1 | 0.1  |
| FC1-20 | 1076687  | 1417758 | 312662 | 1.57 | 13.232 | 1.5 | 1.929 | 3.1 | 0.18525 | 2.6 | 0.863 | 1095.6 | 26.6 | 1091.4 | 20.4 | 1082.9 | 30.9 | -1.2 |
| FC1-27 | 1327274  | 1747727 | 195211 | 1.82 | 13.129 | 1.6 | 1.951 | 3.3 | 0.18583 | 2.9 | 0.881 | 1098.7 | 29.3 | 1098.7 | 22.1 | 1098.5 | 31.1 | 0.0  |
| FC1-17 | 3290252  | 4332534 | 40918  | 1.85 | 13.197 | 1.9 | 1.948 | 3.3 | 0.18651 | 2.7 | 0.819 | 1102.4 | 27.5 | 1097.7 | 22.2 | 1088.2 | 38.1 | -1.3 |
| FC1-25 | 865205.9 | 1139285 | 375208 | 1.57 | 12.996 | 2.0 | 1.904 | 4.2 | 0.17954 | 3.7 | 0.877 | 1064.4 | 36.3 | 1082.5 | 28.1 | 1118.9 | 40.5 | 4.9  |
| FC1-19 | 1118865  | 1473298 | 122465 | 1.60 | 13.099 | 1.4 | 1.893 | 4.4 | 0.17995 | 4.2 | 0.946 | 1066.7 | 41.0 | 1078.7 | 29.3 | 1103.2 | 28.5 | 3.3  |
| FC1-15 | 1111270  | 1463297 | 36059  | 1.79 | 13.254 | 1.5 | 1.893 | 2.8 | 0.18203 | 2.4 | 0.852 | 1078.1 | 23.9 | 1078.6 | 18.7 | 1079.6 | 29.6 | 0.1  |
| FC1-16 | 1110043  | 1461681 | 8242   | 1.99 | 13.462 | 1.8 | 1.897 | 3.2 | 0.18531 | 2.6 | 0.821 | 1095.9 | 26.2 | 1080.1 | 21.1 | 1048.4 | 36.6 | -4.5 |
| FC1-30 | 1141323  | 1502870 | 44061  | 1.78 | 13.067 | 2.0 | 1.960 | 3.2 | 0.18581 | 2.5 | 0.788 | 1098.7 | 25.6 | 1101.8 | 21.6 | 1108.1 | 39.5 | 0.9  |
| FC1-24 | 1313880  | 1730089 | 21854  | 2.31 | 13.238 | 2.1 | 1.944 | 4.4 | 0.18669 | 3.8 | 0.871 | 1103.4 | 38.5 | 1096.3 | 29.3 | 1082.1 | 43.0 | -2.0 |
| FC1-18 | 1026446  | 1351603 | 29117  | 1.68 | 13.036 | 2.2 | 1.932 | 3.7 | 0.18278 | 3.0 | 0.800 | 1082.2 | 29.7 | 1092.4 | 25.0 | 1112.8 | 44.8 | 2.8  |
| FC1-21 | 3347328  | 4407690 | 137397 | 1.82 | 13.129 | 1.4 | 1.965 | 2.9 | 0.18718 | 2.6 | 0.885 | 1106.1 | 26.3 | 1103.5 | 19.6 | 1098.5 | 27.2 | -0.7 |
| FC1-22 | 1502186  | 1978046 | 38717  | 2.16 | 13.108 | 1.6 | 1.942 | 3.5 | 0.18473 | 3.1 | 0.893 | 1092.8 | 31.5 | 1095.8 | 23.5 | 1101.7 | 31.6 | 0.8  |
| FC1-23 | 841626.5 | 1108236 | 6382   | 1.58 | 13.515 | 2.9 | 1.852 | 4.1 | 0.18166 | 2.9 | 0.701 | 1076.0 | 28.3 | 1064.3 | 26.9 | 1040.3 | 58.7 | -3.4 |
| FC1-8  | 3584269  | 4719689 | 99262  | 1.83 | 13.040 | 1.9 | 1.945 | 3.4 | 0.18400 | 2.8 | 0.826 | 1088.8 | 28.1 | 1096.6 | 22.8 | 1112.2 | 38.1 | 2.1  |

**FC1 CA Run 1 (discordant)**

|       |         |         |        |      |        |     |       |     |         |     |       |        |      |        |      |        |      |      |
|-------|---------|---------|--------|------|--------|-----|-------|-----|---------|-----|-------|--------|------|--------|------|--------|------|------|
| FC-xx | 1463637 | 1927287 | 123282 | 1.78 | 12.766 | 2.5 | 1.999 | 3.5 | 0.18513 | 2.4 | 0.686 | 1095.0 | 24.1 | 1115.1 | 23.6 | 1154.5 | 50.4 | 5.2  |
| FC    | 1473281 | 1939985 | 15432  | 1.36 | 13.356 | 2.0 | 1.959 | 2.8 | 0.18980 | 1.9 | 0.703 | 1120.3 | 19.9 | 1101.4 | 18.5 | 1064.2 | 39.3 | -5.3 |
| FC1-9 | 1230258 | 1619978 | 5489   | 1.73 | 13.526 | 2.2 | 1.899 | 3.1 | 0.18638 | 2.2 | 0.711 | 1101.8 | 22.6 | 1080.8 | 20.8 | 1038.7 | 44.5 | -6.1 |

**FC1 CA Run 2**

|       |         |           |        |      |        |     |        |     |         |     |       |        |    |        |      |        |      |      |
|-------|---------|-----------|--------|------|--------|-----|--------|-----|---------|-----|-------|--------|----|--------|------|--------|------|------|
| FC 1  | 1289556 | 1151095.8 | 55877  | 1.57 | 13.116 | 1.9 | 1.934  | 3.9 | 0.18405 | 3.4 | 0.874 | 1089.1 | 34 | 1092.9 | 25.9 | 1100.6 | 37.6 | 1.0  |
| FC 10 | 1842024 | 1644245.1 | 465080 | 1.36 | 13.058 | 1.7 | 1.9524 | 3   | 0.18499 | 2.5 | 0.826 | 1094.2 | 25 | 1099.3 | 20.3 | 1109.3 | 34   | 1.4  |
| FC 11 | 4897509 | 4371661.4 | 427292 | 1.61 | 13.064 | 1.5 | 1.9758 | 2.4 | 0.1873  | 1.8 | 0.758 | 1106.7 | 18 | 1107.3 | 15.9 | 1108.4 | 30.6 | 0.2  |
| FC 12 | 2179744 | 1945704   | 191670 | 1.76 | 13.142 | 2.7 | 1.9391 | 3.6 | 0.18492 | 2.4 | 0.674 | 1093.8 | 24 | 1094.7 | 24.1 | 1096.5 | 53.1 | 0.2  |
| FC 13 | 1927802 | 1720813.1 | 166045 | 2.05 | 13.244 | 2   | 1.9173 | 3   | 0.18425 | 2.3 | 0.762 | 1090.1 | 23 | 1087.1 | 20.2 | 1081.1 | 39.4 | -0.8 |
| FC 14 | 1667875 | 1488794.6 | 154834 | 1.69 | 13.152 | 1.8 | 1.9041 | 3.3 | 0.18171 | 2.7 | 0.843 | 1076.3 | 27 | 1082.5 | 21.7 | 1095.1 | 35.1 | 1.7  |
| FC 15 | 1168174 | 1042746.7 | 310181 | 1.59 | 13.394 | 2.1 | 1.9218 | 3.5 | 0.18677 | 2.8 | 0.8   | 1103.8 | 28 | 1088.7 | 23.1 | 1058.5 | 41.8 | -4.3 |
| FC 16 | 1727527 | 1542041.7 | 163699 | 1.5  | 13.286 | 2.3 | 1.941  | 3.7 | 0.18711 | 2.9 | 0.788 | 1105.7 | 30 | 1095.3 | 24.6 | 1074.8 | 45.4 | -2.9 |
| FC 17 | 2331266 | 2080957   | 289942 | 1.86 | 13.11  | 2.3 | 1.9398 | 3.4 | 0.18452 | 2.5 | 0.741 | 1091.6 | 25 | 1094.9 | 22.6 | 1101.5 | 45.4 | 0.9  |
| FC 18 | 5015595 | 4477068.5 | 304097 | 1.81 | 13.138 | 1.6 | 1.975  | 3   | 0.18827 | 2.5 | 0.838 | 1112   | 26 | 1107   | 20   | 1097.2 | 32.5 | -1.3 |

|       |         |           |         |      |        |     |        |     |         |     |       |        |    |        |      |        |      |      |
|-------|---------|-----------|---------|------|--------|-----|--------|-----|---------|-----|-------|--------|----|--------|------|--------|------|------|
| FC 19 | 1674874 | 1495042.1 | 91584   | 1.48 | 13.169 | 2.5 | 1.9477 | 3.5 | 0.18611 | 2.5 | 0.705 | 1100.3 | 25 | 1097.7 | 23.8 | 1092.5 | 50.3 | -0.7 |
| FC 2  | 702743  | 627289.19 | 493698  | 2.24 | 13.282 | 2.5 | 1.9329 | 3.9 | 0.18628 | 2.9 | 0.758 | 1101.2 | 30 | 1092.6 | 26   | 1075.4 | 50.8 | -2.4 |
| FC 20 | 4937818 | 4407642.4 | 366256  | 1.75 | 13.14  | 1.4 | 1.9813 | 2.6 | 0.1889  | 2.1 | 0.836 | 1115.4 | 22 | 1109.2 | 17.3 | 1097   | 28   | -1.7 |
| FC 21 | 2823315 | 2520174.5 | 467167  | 1.38 | 13.056 | 1.9 | 1.9645 | 3.1 | 0.1861  | 2.5 | 0.793 | 1100.2 | 25 | 1103.4 | 21   | 1109.7 | 38.1 | 0.9  |
| FC 22 | 4726594 | 4219097.7 | 263972  | 1.56 | 13.16  | 2.1 | 1.9797 | 3.4 | 0.18904 | 2.7 | 0.795 | 1116.2 | 28 | 1108.6 | 23.2 | 1093.9 | 41.7 | -2.0 |
| FC 23 | 1914854 | 1709255.3 | 259893  | 1.66 | 13.201 | 2   | 1.9333 | 3.3 | 0.18518 | 2.6 | 0.783 | 1095.2 | 26 | 1092.7 | 21.9 | 1087.6 | 40.7 | -0.7 |
| FC 24 | 1123312 | 1002701.5 | 250468  | 1.51 | 13.233 | 2.2 | 1.9065 | 3.5 | 0.18306 | 2.8 | 0.775 | 1083.7 | 27 | 1083.4 | 23.6 | 1082.8 | 45   | -0.1 |
| FC 25 | 1541284 | 1375795.7 | 414658  | 1.61 | 13.101 | 1.9 | 1.9476 | 2.9 | 0.18514 | 2.2 | 0.747 | 1095   | 22 | 1097.6 | 19.6 | 1102.8 | 39   | 0.7  |
| FC 26 | 3304939 | 2950086.3 | 169425  | 1.51 | 13.143 | 1.7 | 1.9249 | 5.6 | 0.18356 | 5.4 | 0.954 | 1086.4 | 54 | 1089.8 | 37.7 | 1096.4 | 33.8 | 0.9  |
| FC 27 | 5098688 | 4551239.8 | 851547  | 1.8  | 13.108 | 2.3 | 1.9422 | 3.4 | 0.18473 | 2.5 | 0.738 | 1092.8 | 25 | 1095.8 | 22.6 | 1101.8 | 45.5 | 0.8  |
| FC 28 | 4251655 | 3795153   | 675493  | 1.81 | 13.077 | 1.5 | 1.9613 | 2.7 | 0.1861  | 2.2 | 0.82  | 1100.2 | 22 | 1102.3 | 18.1 | 1106.5 | 30.7 | 0.6  |
| FC 29 | 4959125 | 4426661.7 | 381713  | 1.83 | 13.231 | 1.3 | 1.9514 | 2.6 | 0.18734 | 2.3 | 0.866 | 1107   | 23 | 1098.9 | 17.7 | 1083   | 26.4 | -2.2 |
| FC 3  | 2757199 | 2461157.4 | 395195  | 1.99 | 13.01  | 2.1 | 1.946  | 3   | 0.1837  | 2.1 | 0.698 | 1087.1 | 21 | 1097.1 | 20.1 | 1116.8 | 42.9 | 2.7  |
| FC 30 | 1440398 | 1285741.9 | 517898  | 1.6  | 13.117 | 1.7 | 1.9787 | 3   | 0.18833 | 2.5 | 0.832 | 1112.3 | 25 | 1108.3 | 20.2 | 1100.4 | 33.2 | -1.1 |
| FC 31 | 903473  | 806466.73 | 45894   | 1.66 | 13.369 | 2.2 | 1.8837 | 3.8 | 0.18273 | 3.1 | 0.81  | 1081.8 | 31 | 1075.4 | 25.3 | 1062.3 | 45   | -1.8 |
| FC 32 | 3103577 | 2770344.7 | 141836  | 1.5  | 13.069 | 1.7 | 1.9512 | 2.7 | 0.18503 | 2.1 | 0.783 | 1094.4 | 21 | 1098.9 | 18   | 1107.7 | 33.2 | 1.2  |
| FC 33 | 1469612 | 1311819.2 | 116039  | 1.73 | 13.329 | 1.8 | 1.9329 | 3.2 | 0.18694 | 2.6 | 0.829 | 1104.8 | 27 | 1092.5 | 21.3 | 1068.3 | 35.8 | -3.4 |
| FC 34 | 835237  | 745557.26 | 170635  | 2.02 | 13.137 | 2.4 | 1.9836 | 4   | 0.18908 | 3.3 | 0.81  | 1116.4 | 34 | 1109.9 | 27.2 | 1097.3 | 47.4 | -1.7 |
| FC 35 | 2203604 | 1967002.1 | 171209  | 1.78 | 13.253 | 1.6 | 1.9435 | 3   | 0.1869  | 2.6 | 0.857 | 1104.5 | 26 | 1096.2 | 20.3 | 1079.6 | 31.3 | -2.3 |
| FC 36 | 1527569 | 1363553.3 | 7794170 | 1.61 | 13.06  | 1.8 | 1.9508 | 2.7 | 0.18487 | 2.1 | 0.77  | 1093.5 | 21 | 1098.7 | 18.4 | 1109   | 35   | 1.4  |
| FC 37 | 3259449 | 2909480.6 | 1370694 | 1.64 | 13.127 | 2   | 1.949  | 3   | 0.18563 | 2.3 | 0.757 | 1097.7 | 23 | 1098.1 | 20.4 | 1098.9 | 39.7 | 0.1  |
| FC 38 | 749087  | 668657.22 | 326763  | 1.6  | 13.266 | 2.1 | 1.958  | 3.9 | 0.18848 | 3.2 | 0.833 | 1113.1 | 33 | 1101.2 | 25.9 | 1077.7 | 42.7 | -3.3 |
| FC 39 | 1893126 | 1689860.3 | 128002  | 1.73 | 13.122 | 1.9 | 1.9219 | 3.3 | 0.183   | 2.7 | 0.821 | 1083.3 | 27 | 1088.7 | 22.3 | 1099.6 | 38.1 | 1.5  |
| FC 4  | 1447598 | 1292168.8 | 54039   | 1.65 | 13.224 | 2.5 | 1.9062 | 3.6 | 0.18291 | 2.6 | 0.708 | 1082.8 | 26 | 1083.3 | 24   | 1084.1 | 51   | 0.1  |
| FC 40 | 5282571 | 4715379.2 | 447456  | 1.85 | 13.078 | 1.9 | 1.945  | 3.1 | 0.18457 | 2.5 | 0.793 | 1091.9 | 25 | 1096.7 | 21.1 | 1106.4 | 38.3 | 1.3  |
| FC 41 | 1778239 | 1587308.7 | 168755  | 1.65 | 13.001 | 1.6 | 1.9556 | 3.4 | 0.18447 | 3   | 0.879 | 1091.4 | 30 | 1100.4 | 23   | 1118.2 | 32.6 | 2.4  |
| FC 42 | 4952483 | 4420732.9 | 1447344 | 1.76 | 13.086 | 1.6 | 2.0105 | 2.7 | 0.1909  | 2.2 | 0.809 | 1126.2 | 23 | 1119.1 | 18.3 | 1105.1 | 31.8 | -1.9 |
| FC 43 | 2215310 | 1977451.3 | 331325  | 1.68 | 13.109 | 1.9 | 1.9852 | 3.1 | 0.18883 | 2.4 | 0.795 | 1115   | 25 | 1110.5 | 20.7 | 1101.6 | 37.1 | -1.2 |
| FC 44 | 1646459 | 1469678   | 130231  | 1.75 | 12.982 | 2   | 1.9661 | 3.1 | 0.18521 | 2.4 | 0.776 | 1095.4 | 25 | 1104   | 21.2 | 1121   | 39.6 | 2.3  |
| FC 45 | 1918289 | 1712321.5 | 453473  | 1.83 | 13.099 | 2.1 | 1.9443 | 3.3 | 0.18479 | 2.6 | 0.777 | 1093.1 | 26 | 1096.5 | 22.3 | 1103.2 | 41.8 | 0.9  |
| FC 46 | 2428761 | 2167983.9 | 107725  | 1.86 | 13.201 | 2.1 | 1.9876 | 3.1 | 0.19039 | 2.3 | 0.75  | 1123.5 | 24 | 1111.3 | 21   | 1087.6 | 41.3 | -3.3 |
| FC 47 | 3056757 | 2728551.7 | 317162  | 1.42 | 13.128 | 1.9 | 1.937  | 2.9 | 0.18451 | 2.2 | 0.756 | 1091.5 | 22 | 1094   | 19.4 | 1098.7 | 37.9 | 0.7  |
| FC 48 | 2049719 | 1829639.8 | 1E+07   | 1.79 | 13.152 | 2.1 | 1.9559 | 3.4 | 0.18666 | 2.7 | 0.784 | 1103.2 | 27 | 1100.5 | 23   | 1095.1 | 42.5 | -0.7 |
| FC 49 | 2153007 | 1921837.8 | 71189   | 1.49 | 13.226 | 2.3 | 1.9041 | 3.3 | 0.18274 | 2.4 | 0.724 | 1081.9 | 24 | 1082.5 | 22   | 1083.7 | 45.6 | 0.2  |
| FC 5  | 5042672 | 4501238.2 | 455068  | 1.83 | 13.091 | 1.8 | 1.9622 | 3.1 | 0.18638 | 2.5 | 0.821 | 1101.8 | 26 | 1102.6 | 20.7 | 1104.4 | 35.2 | 0.2  |
| FC 50 | 1702384 | 1519598.3 | 2640607 | 1.64 | 13.063 | 2.2 | 1.9561 | 3.7 | 0.18541 | 3   | 0.814 | 1096.4 | 31 | 1100.5 | 25   | 1108.7 | 43.2 | 1.1  |
| FC 51 | 1698340 | 1515988.5 | 399458  | 1.7  | 13.152 | 1.9 | 1.9533 | 3   | 0.1864  | 2.4 | 0.783 | 1101.8 | 24 | 1099.6 | 20.5 | 1095.1 | 37.9 | -0.6 |
| FC 52 | 2036805 | 1818112.4 | 158650  | 2.37 | 13.284 | 1.2 | 1.94   | 2.1 | 0.187   | 1.7 | 0.814 | 1105.1 | 18 | 1095   | 14.3 | 1075   | 24.8 | -2.8 |
| FC 53 | 2116407 | 1889167.5 | 356875  | 1.45 | 13.128 | 2.6 | 1.9363 | 4   | 0.18444 | 3.1 | 0.773 | 1091.2 | 31 | 1093.7 | 26.9 | 1098.7 | 51   | 0.7  |
| FC 54 | 4900585 | 4374407.2 | 485524  | 1.84 | 13.033 | 1.9 | 1.9507 | 2.6 | 0.18447 | 1.9 | 0.711 | 1091.3 | 19 | 1098.7 | 17.8 | 1113.2 | 37.2 | 2.0  |
| FC 55 | 6190346 | 5525686   | 351209  | 1.8  | 13.043 | 1.8 | 1.9489 | 2.7 | 0.18444 | 2.1 | 0.758 | 1091.2 | 21 | 1098.1 | 18.4 | 1111.7 | 35.7 | 1.8  |
| FC 56 | 1333389 | 1190222.5 | 56152   | 1.51 | 13.212 | 2.2 | 1.9282 | 3.7 | 0.18485 | 3   | 0.812 | 1093.4 | 30 | 1090.9 | 24.7 | 1085.9 | 43.2 | -0.7 |
| FC 57 | 2168010 | 1935229.9 | 1005429 | 1.83 | 13.175 | 2.2 | 1.9555 | 3   | 0.18693 | 2.1 | 0.68  | 1104.7 | 21 | 1100.3 | 20.4 | 1091.6 | 44.7 | -1.2 |



|       |         |           |         |      |        |     |        |     |         |     |       |        |    |        |      |        |      |      |
|-------|---------|-----------|---------|------|--------|-----|--------|-----|---------|-----|-------|--------|----|--------|------|--------|------|------|
| FC 58 | 3048605 | 2721275   | 186365  | 1.54 | 13.07  | 1.9 | 1.94   | 3.3 | 0.18398 | 2.7 | 0.814 | 1088.7 | 27 | 1095   | 21.9 | 1107.5 | 37.9 | 1.7  |
| FC 59 | 1766726 | 1577031.9 | 127490  | 1.47 | 13.171 | 2.2 | 1.9535 | 3.7 | 0.18668 | 3   | 0.802 | 1103.4 | 30 | 1099.6 | 24.8 | 1092.3 | 44.2 | -1.0 |
| FC 6  | 2688642 | 2399961.4 | 232236  | 1.4  | 13.006 | 2   | 1.9636 | 3.4 | 0.18531 | 2.8 | 0.809 | 1095.9 | 28 | 1103.1 | 23   | 1117.3 | 40   | 1.9  |
| FC 60 | 1852756 | 1653824.8 | 956919  | 1.71 | 13.32  | 2   | 1.9382 | 3.6 | 0.18732 | 3   | 0.839 | 1106.8 | 31 | 1094.4 | 24.1 | 1069.7 | 39.2 | -3.5 |
| FC 61 | 1565528 | 1397436.6 | 151844  | 1.63 | 13.194 | 2.1 | 1.9761 | 3.6 | 0.18919 | 2.8 | 0.799 | 1117   | 29 | 1107.4 | 23.9 | 1088.6 | 42.7 | -2.6 |
| FC 62 | 1747398 | 1559779.2 | 150389  | 2.06 | 13.229 | 2.1 | 1.9461 | 3.1 | 0.18681 | 2.3 | 0.74  | 1104.1 | 23 | 1097.1 | 20.6 | 1083.4 | 41.4 | -1.9 |
| FC 63 | 1589443 | 1418783.8 | 425564  | 1.56 | 13.124 | 1.8 | 1.9366 | 3.6 | 0.18442 | 3.1 | 0.859 | 1091.1 | 31 | 1093.8 | 23.8 | 1099.4 | 36.4 | 0.8  |
| FC 64 | 1575675 | 1406494.1 | 330703  | 1.72 | 13.207 | 2.1 | 1.9483 | 3.6 | 0.1867  | 3   | 0.817 | 1103.5 | 30 | 1097.8 | 24.3 | 1086.8 | 41.9 | -1.5 |
| FC 65 | 1097277 | 979461.92 | 250124  | 1.57 | 13.285 | 2.4 | 1.9179 | 3.8 | 0.18487 | 3   | 0.784 | 1093.5 | 30 | 1087.4 | 25.3 | 1075   | 47.3 | -1.7 |
| FC 66 | 1257248 | 1122256.8 | 97607   | 1.61 | 13.106 | 2.2 | 1.9358 | 3.6 | 0.18409 | 2.8 | 0.791 | 1089.3 | 28 | 1093.6 | 23.9 | 1102.1 | 43.6 | 1.2  |
| FC 67 | 5255901 | 4691572.7 | 522897  | 1.77 | 13.019 | 1.6 | 1.9929 | 2.8 | 0.18825 | 2.3 | 0.82  | 1111.9 | 23 | 1113.1 | 18.6 | 1115.5 | 31.4 | 0.3  |
| FC 68 | 2361699 | 2108122.4 | 119554  | 1.84 | 13.259 | 1.6 | 1.929  | 2.9 | 0.18558 | 2.4 | 0.829 | 1097.4 | 24 | 1091.2 | 19.3 | 1078.9 | 32.3 | -1.7 |
| FC 69 | 5158319 | 4604468.2 | 364736  | 1.81 | 13.184 | 1.6 | 1.9202 | 2.6 | 0.18369 | 2   | 0.788 | 1087.1 | 20 | 1088.1 | 17.3 | 1090.2 | 31.9 | 0.3  |
| FC 7  | 1874689 | 1673402.9 | 148244  | 1.89 | 13.15  | 2.3 | 1.919  | 3.4 | 0.1831  | 2.6 | 0.752 | 1083.9 | 26 | 1087.7 | 22.9 | 1095.4 | 45.3 | 1.0  |
| FC 70 | 1900676 | 1696599.6 | 57276   | 2.39 | 13.234 | 1.9 | 1.961  | 3   | 0.1883  | 2.3 | 0.774 | 1112.1 | 24 | 1102.2 | 20.2 | 1082.7 | 38.1 | -2.7 |
| FC 71 | 5094895 | 4547854   | 912748  | 1.78 | 13.147 | 2.1 | 1.9838 | 3.2 | 0.18924 | 2.4 | 0.759 | 1117.2 | 25 | 1110   | 21.6 | 1095.9 | 41.7 | -1.9 |
| FC 72 | 2859854 | 2552790.3 | 215120  | 1.9  | 12.995 | 1.8 | 1.9352 | 3   | 0.18248 | 2.3 | 0.791 | 1080.5 | 23 | 1093.4 | 19.8 | 1119   | 36.1 | 3.4  |
| FC 73 | 5952285 | 5313185.7 | 2494868 | 1.82 | 13.015 | 1.6 | 1.9602 | 2.5 | 0.18512 | 2   | 0.783 | 1094.9 | 20 | 1101.9 | 16.9 | 1115.9 | 31.2 | 1.9  |
| FC 74 | 2421747 | 2161723   | 111715  | 1.86 | 13.232 | 2.9 | 1.9238 | 4.3 | 0.18471 | 3.1 | 0.735 | 1092.6 | 32 | 1089.4 | 28.5 | 1082.9 | 58   | -0.9 |
| FC 75 | 1590782 | 1419979.1 | 278333  | 1.79 | 13.206 | 1.7 | 1.9262 | 3.2 | 0.18457 | 2.7 | 0.851 | 1091.9 | 28 | 1090.2 | 21.5 | 1086.9 | 33.9 | -0.5 |
| FC 76 | 1528322 | 1364225.4 | 235659  | 1.89 | 13.15  | 2.4 | 1.9311 | 3.4 | 0.18426 | 2.4 | 0.711 | 1090.2 | 25 | 1091.9 | 22.9 | 1095.3 | 48.2 | 0.5  |
| FC 77 | 2686856 | 2398367.2 | 263048  | 1.82 | 13.121 | 1.6 | 1.957  | 2.8 | 0.18631 | 2.3 | 0.819 | 1101.4 | 23 | 1100.9 | 18.6 | 1099.9 | 31.8 | -0.1 |
| FC 78 | 4782569 | 4269062.6 | 377848  | 1.52 | 13.082 | 1.6 | 1.9685 | 2.5 | 0.18686 | 1.9 | 0.758 | 1104.3 | 19 | 1104.8 | 16.8 | 1105.7 | 32.6 | 0.1  |
| FC 79 | 2738011 | 2444029.6 | 318598  | 1.88 | 13.216 | 2.2 | 1.9385 | 3.3 | 0.18589 | 2.4 | 0.74  | 1099.1 | 25 | 1094.5 | 21.9 | 1085.4 | 44.1 | -1.3 |
| FC 8  | 2333847 | 2083260.9 | 331933  | 2.09 | 13.193 | 1.7 | 1.9256 | 3.2 | 0.18434 | 2.7 | 0.841 | 1090.6 | 27 | 1090   | 21.5 | 1088.8 | 34.8 | -0.2 |
| FC 80 | 4983861 | 4448741.8 | 312899  | 1.84 | 13.024 | 1.7 | 1.9494 | 2.9 | 0.18423 | 2.4 | 0.812 | 1090   | 24 | 1098.2 | 19.4 | 1114.6 | 33.7 | 2.2  |
| FC 81 | 3224636 | 2878405.5 | 339839  | 1.49 | 13.062 | 1.6 | 1.9635 | 2.9 | 0.1861  | 2.4 | 0.825 | 1100.2 | 24 | 1103.1 | 19.4 | 1108.8 | 32.4 | 0.8  |
| FC 82 | 1694365 | 1512440.3 | 74277   | 1.75 | 13.223 | 2.2 | 1.9175 | 3.1 | 0.18398 | 2.1 | 0.702 | 1088.7 | 22 | 1087.2 | 20.4 | 1084.3 | 43.6 | -0.4 |
| FC 83 | 6230052 | 5561128.7 | 9180935 | 1.8  | 13.1   | 2.1 | 1.9506 | 2.9 | 0.18541 | 2   | 0.694 | 1096.5 | 21 | 1098.7 | 19.7 | 1103   | 42.2 | 0.6  |
| FC 84 | 1407208 | 1256115.5 | 7112176 | 1.71 | 13.15  | 2.5 | 1.9423 | 3.4 | 0.18533 | 2.3 | 0.686 | 1096   | 24 | 1095.8 | 22.8 | 1095.4 | 49.4 | -0.1 |
| FC 85 | 4249440 | 3793175.9 | 301211  | 1.84 | 13.089 | 1.3 | 1.9605 | 2.3 | 0.1862  | 1.8 | 0.813 | 1100.8 | 19 | 1102.1 | 15.2 | 1104.6 | 26.4 | 0.3  |
| FC 86 | 1802808 | 1609239.8 | 466426  | 1.7  | 13.037 | 2.6 | 1.9425 | 3.9 | 0.18376 | 2.9 | 0.741 | 1087.5 | 29 | 1095.9 | 26.2 | 1112.5 | 52.3 | 2.2  |
| FC 87 | 2228141 | 1988904.6 | 152118  | 1.72 | 13.309 | 1.8 | 1.9436 | 3.2 | 0.1877  | 2.7 | 0.835 | 1108.9 | 27 | 1096.3 | 21.5 | 1071.3 | 35.4 | -3.5 |
| FC 9  | 5067732 | 4523607.5 | 205648  | 1.83 | 13.159 | 1.2 | 1.9573 | 2.4 | 0.18689 | 2.1 | 0.857 | 1104.5 | 21 | 1100.9 | 16.1 | 1093.9 | 24.7 | -1.0 |

**TABLE S11: Oracle LA-ICPMS U-Pb ZIRCON GEOCHRONOLOGY**

| Zircon<br>#               | <u>Composition</u> |           |         |      |           | <u>Ages</u> |           |       |           |           |            |        |      |        |      |        |      |      |
|---------------------------|--------------------|-----------|---------|------|-----------|-------------|-----------|-------|-----------|-----------|------------|--------|------|--------|------|--------|------|------|
|                           | U                  | U (norm)  | 206Pb/  | U/Th | 206Pb/ 2σ | 207Pb/ 2σ   | 206Pb/ 2σ | Corr. | 206Pb/ 2σ | 207Pb/ 2σ | 206Pb/ 2σ  | %      |      |        |      |        |      |      |
|                           | (238 cps)          | (238 cps) | 204Pb   |      | 207Pb (%) | 235U (%)    | 238U (%)  |       | 238U (Ma) | 235U (Ma) | 207Pb (Ma) | Disc.  |      |        |      |        |      |      |
| <b>Oracle no CA Run 1</b> |                    |           |         |      |           |             |           |       |           |           |            |        |      |        |      |        |      |      |
| Oracle-1                  | 2243176            | 2565978   | 31165   | 2.3  | 11.110    | 1.7         | 2.9605    | 3.9   | 0.23865   | 3.5       | 0.9        | 1379.7 | 43.8 | 1397.5 | 29.6 | 1424.8 | 32.1 | 3.2  |
| Oracle-2                  | 4959082            | 5672714   | 51042   | 10.9 | 10.999    | 1.4         | 3.0273    | 3.8   | 0.24159   | 3.5       | 0.9        | 1395.0 | 44.1 | 1414.5 | 28.8 | 1444.1 | 26.5 | 3.4  |
| Oracle-3                  | 1503427            | 1719777   | 48861   | 1.9  | 10.910    | 2.2         | 3.0111    | 4.2   | 0.23835   | 3.6       | 0.9        | 1378.1 | 44.8 | 1410.4 | 32.1 | 1459.6 | 41.0 | 5.6  |
| Oracle-4                  | 4221910            | 4829460   | 85747   | 2.6  | 10.968    | 1.9         | 2.8222    | 3.2   | 0.22461   | 2.6       | 0.8        | 1306.2 | 30.4 | 1361.5 | 24.1 | 1449.3 | 36.9 | 9.9  |
| Oracle-5                  | 924759             | 1057836   | 14803   | 1.8  | 11.109    | 2.3         | 2.9636    | 3.8   | 0.23888   | 3.1       | 0.8        | 1380.9 | 38.6 | 1398.3 | 29.1 | 1425.1 | 43.1 | 3.1  |
| Oracle-6                  | 887154             | 1014819   | 19323   | 1.2  | 11.057    | 2.0         | 3.0292    | 3.5   | 0.24303   | 2.9       | 0.8        | 1402.4 | 36.8 | 1415.0 | 26.9 | 1434.0 | 37.5 | 2.2  |
| Oracle-7                  | 2151521            | 2461133   | 556715  | 2.7  | 11.020    | 2.1         | 3.0413    | 3.7   | 0.24318   | 3.0       | 0.8        | 1403.2 | 38.1 | 1418.1 | 27.9 | 1440.5 | 39.2 | 2.6  |
| Oracle-8                  | 4895281            | 5599732   | 92618   | 7.6  | 11.404    | 2.1         | 2.9130    | 4.1   | 0.24104   | 3.5       | 0.9        | 1392.1 | 44.4 | 1385.3 | 31.1 | 1374.7 | 40.2 | -1.3 |
| Oracle-9                  | 2035533            | 2328455   | 26758   | 6.1  | 10.899    | 2.9         | 3.2432    | 4.4   | 0.25649   | 3.3       | 0.7        | 1471.9 | 43.3 | 1467.6 | 34.2 | 1461.3 | 55.7 | -0.7 |
| Oracle-10                 | 2163162            | 2474449   | 43724   | 2.2  | 10.693    | 4.1         | 3.2392    | 4.8   | 0.25132   | 2.5       | 0.5        | 1445.3 | 32.8 | 1466.6 | 37.5 | 1497.6 | 77.7 | 3.5  |
| Oracle-11                 | 5292762            | 6054412   | 72330   | 5.2  | 11.021    | 1.8         | 2.9662    | 3.6   | 0.23719   | 3.1       | 0.9        | 1372.1 | 38.4 | 1399.0 | 27.1 | 1440.3 | 33.6 | 4.7  |
| Oracle-12                 | 1951011            | 2231770   | 451965  | 3.0  | 11.086    | 2.0         | 3.1000    | 3.2   | 0.24935   | 2.5       | 0.8        | 1435.1 | 31.8 | 1432.7 | 24.3 | 1429.1 | 37.9 | -0.4 |
| Oracle-13                 | 2572843            | 2943085   | 39324   | 6.9  | 11.013    | 1.8         | 3.0245    | 3.4   | 0.24169   | 2.9       | 0.8        | 1395.5 | 35.8 | 1413.8 | 25.9 | 1441.6 | 35.2 | 3.2  |
| Oracle-14                 | 1555342            | 1779162   | 44719   | 1.3  | 10.929    | 2.0         | 3.0827    | 3.3   | 0.24445   | 2.6       | 0.8        | 1409.8 | 32.9 | 1428.4 | 25.1 | 1456.2 | 37.8 | 3.2  |
| Oracle-15                 | 689957             | 789245    | 12103   | 1.8  | 11.157    | 2.1         | 3.0353    | 4.1   | 0.24572   | 3.6       | 0.9        | 1416.4 | 45.4 | 1416.5 | 31.7 | 1416.8 | 40.5 | 0.0  |
| <b>Oracle no CA Run 2</b> |                    |           |         |      |           |             |           |       |           |           |            |        |      |        |      |        |      |      |
| ORACLE 1                  | 1332275            | 1253434   | 414564  | 1.2  | 11.08     | 2.3         | 3.147     | 4.3   | 0.25307   | 3.7       | 0.85       | 1454.3 | 47.8 | 1444.3 | 33.4 | 1429.7 | 44.1 | -1.7 |
| ORACLE 10                 | 8238010            | 7750500   | 273742  | 6.98 | 11.05     | 1.6         | 3.054     | 3.1   | 0.24496   | 2.6       | 0.85       | 1412.4 | 32.9 | 1421.3 | 23.4 | 1434.5 | 31.1 | 1.5  |
| ORACLE 11                 | 4044685            | 3805328   | 211041  | 3.32 | 11.04     | 1.6         | 3.028     | 2.6   | 0.24254   | 2.1       | 0.8        | 1399.9 | 26.3 | 1414.8 | 20   | 1437.2 | 30.2 | 2.6  |
| ORACLE 12                 | 1876795            | 1765730   | 248470  | 2.83 | 11.01     | 1.5         | 3.045     | 2.8   | 0.24323   | 2.4       | 0.85       | 1403.5 | 30.2 | 1419.1 | 21.6 | 1442.5 | 28.9 | 2.7  |
| ORACLE 13                 | 477156             | 448918.8  | 894564  | 1.74 | 11.1      | 2.8         | 3.079     | 4.4   | 0.24795   | 3.5       | 0.78       | 1427.9 | 44.4 | 1427.6 | 34   | 1427.1 | 53   | -0.1 |
| ORACLE 14                 | 4025433            | 3787216   | 392460  | 4.93 | 11.09     | 2.1         | 3.045     | 3.3   | 0.24499   | 2.6       | 0.79       | 1412.6 | 33.1 | 1419   | 25.4 | 1428.7 | 39.2 | 1.1  |
| ORACLE 15                 | 13362374           | 12571614  | 428035  | 21.6 | 10.89     | 2           | 3.06      | 3.2   | 0.24173   | 2.5       | 0.79       | 1395.7 | 31.7 | 1422.7 | 24.6 | 1463.3 | 37.6 | 4.6  |
| ORACLE 16                 | 1416842            | 1332996   | 1467731 | 2.44 | 11.01     | 2.2         | 3.05      | 3.5   | 0.24364   | 2.8       | 0.79       | 1405.6 | 35.4 | 1420.3 | 27   | 1442.3 | 41.1 | 2.5  |
| ORACLE 17                 | 614036             | 577698.5  | 68909   | 1.49 | 11.16     | 2           | 3.13      | 3.7   | 0.25333   | 3.1       | 0.84       | 1455.6 | 40.1 | 1440.1 | 28.4 | 1417.2 | 38.8 | -2.7 |
| ORACLE 18                 | 1071117            | 1007730   | 6839047 | 1.58 | 11.2      | 2.2         | 3.049     | 3.4   | 0.24788   | 2.6       | 0.76       | 1427.5 | 33.1 | 1420.1 | 26   | 1409   | 42.2 | -1.3 |
| ORACLE 19                 | 932138             | 876975.9  | 71272   | 1.42 | 11.13     | 1.9         | 3.098     | 4.1   | 0.2501    | 3.6       | 0.88       | 1439   | 46.3 | 1432.2 | 31.3 | 1422.2 | 37   | -1.2 |
| ORACLE 2                  | 1488786            | 1400683   | 102433  | 1.74 | 11.09     | 1.8         | 3.041     | 3.4   | 0.24469   | 2.9       | 0.85       | 1411   | 36.3 | 1417.9 | 25.8 | 1428.3 | 34.2 | 1.2  |
| ORACLE 20                 | 496693             | 467299.7  | 22639   | 0.81 | 11.11     | 2.5         | 3.101     | 5     | 0.24994   | 4.3       | 0.86       | 1438.2 | 55.9 | 1432.9 | 38.6 | 1425.1 | 48.6 | -0.9 |
| ORACLE 21                 | 1296837            | 1220093   | 163020  | 1.94 | 11.03     | 2.1         | 3.108     | 3.6   | 0.24875   | 2.9       | 0.82       | 1432   | 37.8 | 1434.7 | 27.7 | 1438.8 | 39.8 | 0.5  |
| ORACLE 22                 | 1156006            | 1087596   | 109347  | 1.26 | 11.07     | 2.2         | 3.224     | 4.2   | 0.259     | 3.6       | 0.85       | 1484.7 | 47.7 | 1463   | 32.7 | 1431.5 | 41.9 | -3.7 |
| ORACLE 23                 | 1260519            | 1185924   | 2529654 | 1.5  | 11.03     | 2           | 3.175     | 3.7   | 0.25411   | 3         | 0.83       | 1459.6 | 39.6 | 1451.2 | 28.2 | 1438.9 | 38.9 | -1.4 |
| ORACLE 25                 | 2098532            | 1974345   | 63855   | 4.11 | 11.12     | 1.8         | 3.219     | 3.6   | 0.2598    | 3.2       | 0.87       | 1488.8 | 41.9 | 1461.7 | 28   | 1422.5 | 33.6 | -4.7 |
| ORACLE 27                 | 1240288            | 1166890   | 72994   | 1.76 | 11.02     | 2.4         | 3.047     | 3.4   | 0.24354   | 2.5       | 0.73       | 1405.1 | 31.8 | 1419.5 | 26.4 | 1441.2 | 44.8 | 2.5  |
| ORACLE 28                 | 1071591            | 1008176   | 72433   | 2.17 | 11.06     | 2           | 3.08      | 3.2   | 0.24707   | 2.5       | 0.78       | 1423.4 | 32.5 | 1427.8 | 24.9 | 1434.3 | 38.4 | 0.8  |
| ORACLE 3                  | 2650218            | 2493383   | 329363  | 3.74 | 11.15     | 1.6         | 3.014     | 3.3   | 0.24394   | 2.9       | 0.87       | 1407.2 | 36.1 | 1411.3 | 25.1 | 1417.5 | 31.3 | 0.7  |
| ORACLE 30                 | 1194094            | 1123430   | 212896  | 1.72 | 11.11     | 2.4         | 3.102     | 4.1   | 0.25011   | 3.4       | 0.82       | 1439   | 43.9 | 1433.2 | 31.8 | 1424.5 | 45.3 | -1.0 |
| ORACLE 4                  | 1927709            | 1813631   | 382871  | 2.64 | 11.14     | 1.6         | 3.123     | 3.4   | 0.25234   | 3         | 0.88       | 1450.6 | 39   | 1438.4 | 26.3 | 1420.5 | 31   | -2.1 |

|          |         |          |        |      |       |     |       |     |         |     |      |        |      |        |      |        |      |      |
|----------|---------|----------|--------|------|-------|-----|-------|-----|---------|-----|------|--------|------|--------|------|--------|------|------|
| ORACLE 5 | 3333395 | 3136131  | 338334 | 2.61 | 11.07 | 1.8 | 3.103 | 2.9 | 0.24911 | 2.3 | 0.79 | 1433.9 | 29.8 | 1433.3 | 22.6 | 1432.4 | 34.7 | -0.1 |
| ORACLE 6 | 946581  | 890564.2 | 163860 | 1.54 | 11.08 | 1.9 | 3.114 | 3.6 | 0.25041 | 3   | 0.84 | 1440.6 | 39   | 1436.2 | 27.6 | 1429.7 | 37.2 | -0.8 |
| ORACLE 7 | 2131325 | 2005197  | 369622 | 1.68 | 11.1  | 1.8 | 3.039 | 3.5 | 0.24483 | 3   | 0.86 | 1411.7 | 37.9 | 1417.5 | 26.5 | 1426.2 | 33.6 | 1.0  |
| ORACLE 8 | 1164639 | 1095718  | 104027 | 1.34 | 11.39 | 2.5 | 3.025 | 3.3 | 0.25002 | 2.2 | 0.67 | 1438.6 | 28.5 | 1413.8 | 25.2 | 1376.7 | 47.3 | -4.5 |
| ORACLE 9 | 2357683 | 2218160  | 296114 | 2.51 | 10.98 | 1.6 | 3.188 | 2.7 | 0.25403 | 2.1 | 0.79 | 1459.2 | 27.9 | 1454.3 | 20.8 | 1447.1 | 31.1 | -0.8 |

**Oracle no CA Run 2 (discordant)**

|           |         |         |        |      |       |     |       |     |         |     |      |        |      |        |      |        |      |      |
|-----------|---------|---------|--------|------|-------|-----|-------|-----|---------|-----|------|--------|------|--------|------|--------|------|------|
| ORACLE 24 | 1034981 | 973733  | 142415 | 3.07 | 11.16 | 1.5 | 3.238 | 4.6 | 0.26211 | 4.4 | 0.95 | 1500.6 | 58.3 | 1466.2 | 35.7 | 1416.7 | 28.4 | -5.9 |
| ORACLE 26 | 3262174 | 3069125 | 627209 | 4.76 | 11.17 | 1.5 | 2.948 | 2.9 | 0.239   | 2.5 | 0.86 | 1381.5 | 31.2 | 1394.4 | 22.1 | 1414.3 | 28.7 | 2.3  |
| ORACLE 29 | 3831078 | 3604362 | 10000  | 4.91 | 10    | 1   | 0.1   | 1   | 0.1     | 1   | 0.8  | 500    | 1    | 500    | 1    | 500    | 1    | 0.0  |

Composition

Ages

| Zircon # | U (238 cps) | U (norm) (238 cps) | 206Pb/ 204Pb | U/Th | 206Pb/ 2σ | 207Pb/ 2σ | 206Pb/ 2σ | 2σ | Corr. | 206Pb/ 2σ | 2σ | 207Pb/ 2σ | 206Pb/ 2σ | %          |       |
|----------|-------------|--------------------|--------------|------|-----------|-----------|-----------|----|-------|-----------|----|-----------|-----------|------------|-------|
|          |             |                    |              |      | 207Pb (%) | 235U (%)  | 238U (%)  |    |       | 238U (Ma) | 2σ | 235U (Ma) | 2σ        | 207Pb (Ma) | Disc. |

**Oracle CA Run 1**

|           |         |         |       |      |        |     |       |     |         |     |       |        |      |        |      |        |      |      |
|-----------|---------|---------|-------|------|--------|-----|-------|-----|---------|-----|-------|--------|------|--------|------|--------|------|------|
| Oracle-1  | 1272256 | 1675280 | 42437 | 0.94 | 11.037 | 2.0 | 3.006 | 4.3 | 0.24076 | 3.8 | 0.889 | 1390.7 | 47.4 | 1409.3 | 32.5 | 1437.5 | 37.3 | 3.3  |
| Oracle-2  | 967175  | 1273556 | 83148 | 1.53 | 11.371 | 1.8 | 2.989 | 3.2 | 0.24659 | 2.6 | 0.825 | 1420.9 | 33.5 | 1404.8 | 24.2 | 1380.4 | 34.5 | -2.9 |
| Oracle-3  | 1106256 | 1456695 | 24360 | 2.25 | 10.954 | 1.7 | 3.095 | 3.1 | 0.24601 | 2.5 | 0.826 | 1417.9 | 32.4 | 1431.5 | 23.7 | 1451.9 | 33.1 | 2.3  |
| Oracle-4  | 1598713 | 2105151 | 81698 | 2.25 | 11.156 | 2.3 | 3.081 | 3.5 | 0.24942 | 2.7 | 0.766 | 1435.5 | 34.9 | 1428.1 | 27.2 | 1417.0 | 43.6 | -1.3 |
| Oracle-5  | 1028902 | 1354836 | 26367 | 2.49 | 11.011 | 2.0 | 3.069 | 3.4 | 0.24516 | 2.7 | 0.803 | 1413.5 | 34.9 | 1424.9 | 26.2 | 1441.9 | 38.9 | 2.0  |
| Oracle-6  | 1132372 | 1491083 | 86016 | 2.18 | 11.131 | 2.1 | 3.173 | 2.8 | 0.25631 | 1.8 | 0.658 | 1471.0 | 24.1 | 1450.7 | 21.5 | 1421.2 | 40.1 | -3.5 |
| Oracle-7  | 1190288 | 1567346 | 31511 | 2.01 | 11.019 | 2.5 | 3.046 | 3.7 | 0.24352 | 2.8 | 0.740 | 1405.0 | 34.9 | 1419.2 | 28.6 | 1440.5 | 47.9 | 2.5  |
| Oracle-8  | 683726  | 900316  | 18724 | 2.54 | 11.068 | 2.5 | 3.006 | 3.3 | 0.24142 | 2.1 | 0.645 | 1394.1 | 26.5 | 1409.2 | 25.0 | 1432.0 | 47.8 | 2.7  |
| Oracle-10 | 982157  | 1293284 | 47671 | 2.37 | 11.188 | 2.1 | 2.915 | 4.2 | 0.23661 | 3.6 | 0.870 | 1369.0 | 44.8 | 1385.7 | 31.6 | 1411.5 | 39.4 | 3.0  |
| Oracle-11 | 791501  | 1042231 | 24921 | 1.22 | 11.230 | 2.4 | 3.065 | 4.2 | 0.24977 | 3.4 | 0.820 | 1437.3 | 44.4 | 1424.1 | 32.2 | 1404.4 | 46.0 | -2.3 |
| Oracle-12 | 1499438 | 1974428 | 14008 | 1.33 | 11.053 | 2.4 | 3.141 | 3.2 | 0.25191 | 2.2 | 0.680 | 1448.3 | 28.5 | 1442.8 | 24.9 | 1434.7 | 45.2 | -0.9 |
| Oracle-13 | 4950280 | 6518424 | 34667 | 3.97 | 11.044 | 1.5 | 3.103 | 2.9 | 0.24866 | 2.5 | 0.851 | 1431.6 | 31.9 | 1433.4 | 22.4 | 1436.2 | 29.2 | 0.3  |
| Oracle-14 | 856074  | 1127261 | 6748  | 1.97 | 11.273 | 1.8 | 2.967 | 3.7 | 0.24266 | 3.2 | 0.873 | 1400.5 | 40.6 | 1399.2 | 28.1 | 1397.1 | 34.6 | -0.2 |

**Oracle CA Run 1 (discordant)**

|           |         |         |       |      |        |     |       |      |         |      |       |        |        |        |       |        |       |       |
|-----------|---------|---------|-------|------|--------|-----|-------|------|---------|------|-------|--------|--------|--------|-------|--------|-------|-------|
| Oracle-9  | 1385662 | 1824610 | 24283 | 2.49 | 10.270 | 2.1 | 3.524 | 4.5  | 0.26262 | 4.0  | 0.887 | 1503.3 | 53.8   | 1532.7 | 35.8  | 1573.5 | 39.1  | 4.5   |
| Oracle-15 | 508335  | 669364  | 12576 | 1.21 | 12.001 | 9.6 | 4.068 | 60.8 | 0.35420 | 60.0 | 0.987 | 1954.6 | 1013.8 | 1647.9 | 505.5 | 1276.1 | 187.8 | -53.2 |

**Oracle CA Run 2**

|           |         |          |        |      |       |     |       |     |         |     |      |        |      |        |      |        |      |      |
|-----------|---------|----------|--------|------|-------|-----|-------|-----|---------|-----|------|--------|------|--------|------|--------|------|------|
| Oracle 10 | 2254257 | 2012216  | 88057  | 1.35 | 11.08 | 1.6 | 3.088 | 2.7 | 0.24822 | 2.2 | 0.8  | 1429.3 | 27.8 | 1429.8 | 20.8 | 1430.6 | 31.1 | 0.1  |
| Oracle 11 | 2833008 | 2528827  | 339436 | 0.66 | 10.94 | 1.9 | 3.098 | 4.5 | 0.24592 | 4.1 | 0.91 | 1417.4 | 52.6 | 1432.1 | 34.8 | 1454   | 35.7 | 2.5  |
| Oracle 12 | 1786809 | 1594959  | 98315  | 2.48 | 11.07 | 2.1 | 3.169 | 3.1 | 0.2545  | 2.3 | 0.74 | 1461.7 | 30   | 1449.7 | 23.9 | 1432.1 | 39.8 | -2.1 |
| Oracle 13 | 1696206 | 1514084  | 203323 | 2.94 | 11    | 2.9 | 3.206 | 4.1 | 0.25585 | 2.9 | 0.71 | 1468.6 | 38.2 | 1458.6 | 31.9 | 1444   | 55.6 | -1.7 |
| Oracle 14 | 1779481 | 1588417  | 163346 | 2.72 | 11.22 | 2   | 3.135 | 2.7 | 0.25518 | 1.7 | 0.65 | 1465.1 | 22.7 | 1441.4 | 20.6 | 1406.5 | 38.9 | -4.2 |
| Oracle 15 | 1725260 | 1540018  | 384353 | 1.54 | 10.98 | 2.1 | 3.119 | 2.9 | 0.24839 | 2.1 | 0.7  | 1430.1 | 26.3 | 1437.4 | 22.5 | 1448.2 | 39.7 | 1.2  |
| Oracle 16 | 2053829 | 1833309  | 797585 | 2.45 | 11.12 | 2.1 | 3.114 | 3   | 0.2513  | 2.1 | 0.71 | 1445.2 | 27.7 | 1436.2 | 23.1 | 1423   | 40.5 | -1.6 |
| Oracle 17 | 1664465 | 1485751  | 87609  | 2.6  | 11.02 | 2   | 3.205 | 3.4 | 0.2562  | 2.7 | 0.81 | 1470.4 | 35.9 | 1458.5 | 26   | 1441.1 | 37.2 | -2.0 |
| Oracle 18 | 1577175 | 1407833  | 349913 | 1.05 | 10.98 | 1.6 | 3.238 | 3.6 | 0.25783 | 3.2 | 0.89 | 1478.7 | 42.9 | 1466.2 | 28.2 | 1448.2 | 31.1 | -2.1 |
| Oracle 19 | 1901334 | 1697187  | 504060 | 0.86 | 11.01 | 1.7 | 3.214 | 3.2 | 0.25663 | 2.7 | 0.85 | 1472.6 | 36.1 | 1460.4 | 25   | 1442.8 | 32.3 | -2.1 |
| Oracle 2  | 1082168 | 965975.2 | 140566 | 1.79 | 11.05 | 1.7 | 3.061 | 3.3 | 0.24541 | 2.8 | 0.85 | 1414.8 | 36.1 | 1422.9 | 25.5 | 1435.1 | 33.2 | 1.4  |
| Oracle 20 | 1486503 | 1326897  | 126079 | 1.33 | 11.02 | 1.8 | 3.197 | 3.4 | 0.25559 | 2.9 | 0.85 | 1467.2 | 37.6 | 1456.5 | 26   | 1440.8 | 33.5 | -1.8 |
| Oracle 21 | 997073  | 890016.9 | 115425 | 1.5  | 11.14 | 2.5 | 3.11  | 3.9 | 0.2514  | 3   | 0.77 | 1445.7 | 39.2 | 1435.1 | 30.1 | 1419.5 | 47.5 | -1.8 |

|           |         |          |         |      |       |     |       |     |         |     |      |        |      |        |      |        |      |      |
|-----------|---------|----------|---------|------|-------|-----|-------|-----|---------|-----|------|--------|------|--------|------|--------|------|------|
| Oracle 22 | 743825  | 663960.2 | 35759   | 0.9  | 11.12 | 2.8 | 3.227 | 4.6 | 0.26032 | 3.6 | 0.8  | 1491.5 | 48.4 | 1463.6 | 35.4 | 1423.4 | 52.8 | -4.8 |
| Oracle 23 | 1012630 | 903903.5 | 121660  | 2.08 | 10.85 | 2   | 3.273 | 3.2 | 0.25767 | 2.5 | 0.78 | 1477.9 | 32.7 | 1474.6 | 24.6 | 1469.8 | 37.3 | -0.6 |
| Oracle 24 | 1062094 | 948056.5 | 167415  | 1.18 | 11.15 | 2   | 3.008 | 4.1 | 0.24337 | 3.6 | 0.88 | 1404.2 | 46   | 1409.7 | 31.6 | 1418   | 37.6 | 1.0  |
| Oracle 25 | 673679  | 601345.8 | 2939378 | 0.51 | 11.1  | 3   | 3.038 | 4.8 | 0.24461 | 3.8 | 0.78 | 1410.6 | 47.5 | 1417.1 | 36.8 | 1426.9 | 57.6 | 1.1  |
| Oracle 26 | 4426977 | 3951651  | 169703  | 2.08 | 10.96 | 1.8 | 3.065 | 2.7 | 0.24363 | 2   | 0.74 | 1405.5 | 25.4 | 1424   | 20.8 | 1451.7 | 34.8 | 3.2  |
| Oracle 27 | 1414569 | 1262686  | 214142  | 0.91 | 10.96 | 1.7 | 3.077 | 2.7 | 0.24461 | 2.1 | 0.77 | 1410.6 | 26.6 | 1427   | 20.9 | 1451.5 | 33.2 | 2.8  |
| Oracle 28 | 5102582 | 4554716  | 582142  | 4.81 | 10.9  | 1.6 | 3.155 | 2.7 | 0.2495  | 2.1 | 0.8  | 1435.9 | 27.3 | 1446.3 | 20.5 | 1461.6 | 30.4 | 1.8  |
| Oracle 29 | 3832173 | 3420711  | 696608  | 0.45 | 10.95 | 1.8 | 3.164 | 2.7 | 0.25131 | 2.1 | 0.76 | 1445.2 | 26.8 | 1448.4 | 21.1 | 1453.1 | 34   | 0.5  |
| Oracle 3  | 2283386 | 2038218  | 358709  | 1.32 | 10.9  | 2.2 | 3.169 | 3.6 | 0.25059 | 2.9 | 0.79 | 1441.5 | 37.1 | 1449.7 | 28   | 1461.6 | 42.1 | 1.4  |
| Oracle 30 | 1485222 | 1325753  | 122325  | 0.85 | 11.07 | 2.1 | 3.265 | 3.5 | 0.26218 | 2.9 | 0.81 | 1501   | 38.6 | 1472.8 | 27.5 | 1432.4 | 39.3 | -4.8 |
| Oracle 4  | 1825028 | 1629074  | 58934   | 1.74 | 11.04 | 1.7 | 3.114 | 2.7 | 0.2494  | 2.1 | 0.77 | 1435.4 | 26.9 | 1436   | 20.8 | 1437   | 32.7 | 0.1  |
| Oracle 5  | 1758545 | 1569729  | 1191928 | 1.88 | 10.92 | 2   | 3.135 | 3.3 | 0.24846 | 2.6 | 0.8  | 1430.5 | 33.5 | 1441.2 | 25.2 | 1457   | 37.5 | 1.8  |
| Oracle 6  | 1161277 | 1036590  | 441963  | 2.2  | 10.99 | 2.1 | 3.128 | 4.1 | 0.24951 | 3.6 | 0.86 | 1435.9 | 45.8 | 1439.6 | 31.7 | 1444.9 | 39.5 | 0.6  |
| Oracle 7  | 2047536 | 1827691  | 300360  | 5.01 | 11.07 | 1.9 | 3.142 | 2.9 | 0.25229 | 2.2 | 0.75 | 1450.3 | 28.1 | 1443   | 22.3 | 1432.3 | 36.7 | -1.3 |
| Oracle 8  | 2202259 | 1965802  | 2224447 | 2.32 | 10.96 | 1.5 | 3.122 | 2.6 | 0.2482  | 2.1 | 0.82 | 1429.2 | 27.1 | 1438.1 | 19.9 | 1451.3 | 28.2 | 1.5  |
| Oracle 9  | 830030  | 740909.3 | 168937  | 1.42 | 11.14 | 1.9 | 3.171 | 3.8 | 0.25618 | 3.2 | 0.86 | 1470.2 | 42.6 | 1450.1 | 29   | 1420.6 | 36.2 | -3.5 |

**Oracle CA Run 2 (discordant)**

|          |        |          |      |      |      |     |       |    |         |   |      |       |      |       |      |       |     |      |
|----------|--------|----------|------|------|------|-----|-------|----|---------|---|------|-------|------|-------|------|-------|-----|------|
| Oracle 1 | 110749 | 98857.83 | 5000 | 1.15 | 14.5 | 8.7 | 1.421 | 11 | 0.14945 | 7 | 0.63 | 897.9 | 58.6 | 897.6 | 66.3 | 896.8 | 179 | -0.1 |
|----------|--------|----------|------|------|------|-----|-------|----|---------|---|------|-------|------|-------|------|-------|-----|------|

**TABLE S12: QGNG LA-ICPMS U-Pb ZIRCON GEOCHRONOLOGY**

| Zircon #                             | Composition |                    |             |      |             |        |            |        |            |        | Ages  |                 |         |                 |         |                 |         |         |
|--------------------------------------|-------------|--------------------|-------------|------|-------------|--------|------------|--------|------------|--------|-------|-----------------|---------|-----------------|---------|-----------------|---------|---------|
|                                      | U (238 cps) | U (norm) (238 cps) | 206Pb/204Pb | U/Th | 206Pb/207Pb | 2σ (%) | 207Pb/235U | 2σ (%) | 206Pb/238U | 2σ (%) | Corr. | 206Pb/238U (Ma) | 2σ (Ma) | 207Pb/235U (Ma) | 2σ (Ma) | 206Pb/238U (Ma) | 2σ (Ma) | % Disc. |
| <b>QGNG no CA Run 1</b>              |             |                    |             |      |             |        |            |        |            |        |       |                 |         |                 |         |                 |         |         |
| QGNG-1                               | 3246504     | 3713689            | 57029       | 1.12 | 8.813       | 1.8    | 4.8319     | 3.4    | 0.30896    | 2.9    | 0.842 | 1735.6          | 43.4    | 1790.5          | 28.5    | 1855.0          | 33.1    | 6.4     |
| QGNG-2                               | 1163394     | 1330811            | 39464       | 1.25 | 9.138       | 2.3    | 4.8139     | 4.2    | 0.31917    | 3.5    | 0.829 | 1785.7          | 54.2    | 1787.3          | 35.2    | 1789.2          | 42.6    | 0.2     |
| QGNG-3                               | 3644589     | 4169060            | 42406       | 1.10 | 8.745       | 1.7    | 5.1650     | 3.1    | 0.32771    | 2.6    | 0.840 | 1827.3          | 41.3    | 1846.9          | 26.3    | 1869.0          | 30.3    | 2.2     |
| QGNG-4                               | 1005887     | 1150639            | 64534       | 1.31 | 8.987       | 2.1    | 4.9519     | 4.1    | 0.32292    | 3.6    | 0.867 | 1804.0          | 56.2    | 1811.2          | 34.8    | 1819.4          | 37.3    | 0.9     |
| QGNG-5                               | 1216017     | 1391007            | 23316       | 1.21 | 8.749       | 1.8    | 4.9994     | 2.8    | 0.31739    | 2.1    | 0.755 | 1777.0          | 32.3    | 1819.2          | 23.3    | 1868.0          | 32.6    | 4.9     |
| QGNG-6                               | 4219539     | 4826748            | 58369       | 1.16 | 8.888       | 1.7    | 5.0126     | 3.7    | 0.32327    | 3.3    | 0.883 | 1805.7          | 51.9    | 1821.5          | 31.6    | 1839.5          | 31.7    | 1.8     |
| QGNG-7                               | 877342      | 1003595            | 19795       | 1.38 | 8.758       | 1.9    | 4.9661     | 3.4    | 0.31556    | 2.8    | 0.817 | 1768.0          | 42.7    | 1813.6          | 28.6    | 1866.3          | 35.2    | 5.3     |
| QGNG-9                               | 1950160     | 2230796            | 20907       | 1.68 | 8.660       | 1.7    | 5.1931     | 3.5    | 0.32631    | 3.1    | 0.881 | 1820.5          | 49.5    | 1851.5          | 30.2    | 1886.5          | 30.2    | 3.5     |
| QGNG-10                              | 9747769     | 11150512           | 221853      | 1.82 | 9.110       | 1.4    | 5.0932     | 3.3    | 0.33668    | 3.0    | 0.910 | 1870.7          | 49.2    | 1835.0          | 28.3    | 1794.7          | 25.1    | -4.2    |
| QGNG-11                              | 1265111     | 1447166            | 11409       | 1.00 | 8.918       | 1.9    | 4.9928     | 3.2    | 0.32306    | 2.6    | 0.803 | 1804.7          | 40.5    | 1818.1          | 27.1    | 1833.5          | 34.6    | 1.6     |
| QGNG-12                              | 3365759     | 3850106            | 267981      | 1.09 | 8.762       | 2.0    | 5.1979     | 3.7    | 0.33047    | 3.1    | 0.841 | 1840.6          | 49.4    | 1852.3          | 31.2    | 1865.3          | 35.8    | 1.3     |
| QGNG-13                              | 2211965     | 2530275            | 34166       | 1.34 | 8.672       | 2.0    | 5.2249     | 3.2    | 0.32875    | 2.5    | 0.779 | 1832.3          | 40.4    | 1856.7          | 27.7    | 1884.1          | 36.7    | 2.7     |
| QGNG-14                              | 3098383     | 3544253            | 121544      | 1.16 | 8.857       | 2.7    | 5.2014     | 5.3    | 0.33428    | 4.5    | 0.853 | 1859.1          | 72.5    | 1852.8          | 44.8    | 1845.8          | 49.7    | -0.7    |
| QGNG-15                              | 1588424     | 1817005            | 25729       | 1.82 | 8.931       | 1.6    | 5.0699     | 2.9    | 0.32854    | 2.5    | 0.840 | 1831.3          | 39.2    | 1831.1          | 24.8    | 1830.8          | 28.7    | 0.0     |
| <b>QGNG no CA Run 1 (discordant)</b> |             |                    |             |      |             |        |            |        |            |        |       |                 |         |                 |         |                 |         |         |
| QGNG-8                               | 1548166     | 1770953            | 36247       | 0.87 | 8.952       | 2.4    | 5.9582     | 8.9    | 0.38702    | 8.6    | 0.963 | 2109.0          | 154.1   | 1969.8          | 77.4    | 1826.5          | 43.3    | -15.5   |
| <b>QGNG no CA Run 2</b>              |             |                    |             |      |             |        |            |        |            |        |       |                 |         |                 |         |                 |         |         |
| QGNG 10                              | 6132226     | 5769332.65         | 2223097     | 1.54 | 8.969       | 1.4    | 5.0461     | 2.2    | 0.32838    | 1.8    | 0.784 | 1830.5          | 28.1    | 1827.1          | 19      | 1823.2          | 25.3    | -0.4    |
| QGNG 11                              | 1220741     | 1148499.89         | 385964      | 1.87 | 8.891       | 1.6    | 5.2617     | 3.3    | 0.33944    | 2.9    | 0.88  | 1884            | 48      | 1862.7          | 28.5    | 1839            | 28.7    | -2.4    |
| QGNG 12                              | 2126583     | 2000735.9          | 239780      | 1.2  | 8.917       | 1.8    | 5.2128     | 2.7    | 0.33729    | 2      | 0.753 | 1873.6          | 32.8    | 1854.7          | 22.8    | 1833.5          | 31.9    | -2.2    |
| QGNG 13                              | 3612232     | 3398467.05         | 528818      | 1.1  | 8.949       | 1.3    | 5.0003     | 2.3    | 0.32467    | 1.9    | 0.827 | 1812.5          | 30.3    | 1819.4          | 19.6    | 1827.2          | 23.6    | 0.8     |
| QGNG 14                              | 1943258     | 1828259.72         | 1102870     | 1.3  | 8.883       | 2      | 5.1431     | 3.1    | 0.33149    | 2.3    | 0.755 | 1845.6          | 37.2    | 1843.3          | 26.1    | 1840.6          | 36.5    | -0.3    |
| QGNG 15                              | 1648556     | 1550997.62         | 444510      | 1.18 | 8.904       | 1.7    | 5.1101     | 3.1    | 0.33015    | 2.6    | 0.842 | 1839.1          | 41.8    | 1837.8          | 26.3    | 1836.3          | 30.3    | -0.2    |
| QGNG 16                              | 1943449     | 1828439.42         | 381002      | 1.88 | 8.954       | 1.6    | 5.0382     | 3.4    | 0.32732    | 2.9    | 0.871 | 1825.4          | 46.4    | 1825.8          | 28.4    | 1826.2          | 29.9    | 0.0     |
| QGNG 18                              | 2313308     | 2176410.88         | 719386      | 1.76 | 8.776       | 2      | 5.1016     | 3.8    | 0.32486    | 3.2    | 0.857 | 1813.4          | 51.3    | 1836.4          | 32.2    | 1862.5          | 35.3    | 2.6     |
| QGNG 19                              | 2192182     | 2062452.88         | 355420      | 1.18 | 8.851       | 1.3    | 5.1893     | 2.8    | 0.33325    | 2.4    | 0.877 | 1854.1          | 39.5    | 1850.9          | 23.8    | 1847.2          | 24.3    | -0.4    |
| QGNG 2                               | 2038736     | 1918087.52         | 486905      | 1    | 8.982       | 1.6    | 5.0948     | 3.9    | 0.33203    | 3.5    | 0.907 | 1848.2          | 56.8    | 1835.2          | 33.1    | 1820.5          | 29.8    | -1.5    |
| QGNG 20                              | 2142148     | 2015379.8          | 3653435     | 1.01 | 8.891       | 1.7    | 5.1652     | 3.1    | 0.33323    | 2.6    | 0.828 | 1854            | 41.4    | 1846.9          | 26.4    | 1838.9          | 31.5    | -0.8    |
| QGNG 21                              | 1270830     | 1195624.72         | 393581      | 1.28 | 8.897       | 1.9    | 4.9455     | 4      | 0.31925    | 3.4    | 0.871 | 1786.1          | 53.7    | 1810.1          | 33.4    | 1837.8          | 35.2    | 2.8     |
| QGNG 23                              | 1851462     | 1741896.04         | 243830      | 1.05 | 8.821       | 1.7    | 5.155      | 3.1    | 0.32993    | 2.6    | 0.834 | 1838            | 41.4    | 1845.2          | 26.4    | 1853.3          | 30.9    | 0.8     |
| QGNG 24                              | 1648561     | 1551002.33         | 96177       | 0.98 | 8.818       | 1.4    | 5.0729     | 3.3    | 0.32458    | 3      | 0.91  | 1812.1          | 47.2    | 1831.6          | 27.9    | 1853.8          | 24.7    | 2.2     |
| QGNG 25                              | 2847847     | 2679316.89         | 339325      | 1.06 | 8.915       | 1.6    | 5.0438     | 2.9    | 0.32626    | 2.5    | 0.844 | 1820.2          | 39.3    | 1826.7          | 24.9    | 1834.1          | 28.5    | 0.8     |
| QGNG 26                              | 5267264     | 4955557.44         | 729667      | 1.16 | 8.915       | 1.4    | 5.0483     | 3.1    | 0.32655    | 2.7    | 0.891 | 1821.7          | 43.5    | 1827.5          | 26.1    | 1834.1          | 25.4    | 0.7     |
| QGNG 27                              | 3877303     | 3647851.66         | 216165      | 1.16 | 8.876       | 1.4    | 5.0535     | 2.7    | 0.32545    | 2.3    | 0.856 | 1816.3          | 37.1    | 1828.3          | 23.2    | 1842.1          | 25.7    | 1.4     |
| QGNG 28                              | 2323152     | 2185672.33         | 318375      | 1.64 | 8.928       | 1.4    | 5.1032     | 2.4    | 0.33059    | 2      | 0.812 | 1841.2          | 31.7    | 1836.6          | 20.7    | 1831.4          | 25.8    | -0.5    |
| QGNG 29                              | 1765357     | 1660886.56         | 590732      | 1.19 | 8.847       | 1.2    | 5.1463     | 2.7    | 0.33036    | 2.4    | 0.899 | 1840.1          | 38.9    | 1843.8          | 23      | 1847.9          | 21.4    | 0.4     |
| QGNG 3                               | 1965810     | 1849477.14         | 203937      | 1.03 | 8.876       | 1      | 5.082      | 2.8    | 0.32729    | 2.6    | 0.931 | 1825.2          | 42      | 1833.1          | 24.1    | 1842.1          | 18.8    | 0.9     |
| QGNG 30                              | 2415192     | 2272265.58         | 236388      | 0.97 | 8.963       | 1.3    | 5.0711     | 2.8    | 0.32979    | 2.5    | 0.877 | 1837.4          | 39.4    | 1831.3          | 23.8    | 1824.4          | 24.5    | -0.7    |

|        |         |            |         |      |       |     |        |     |         |     |       |        |      |        |      |        |      |      |
|--------|---------|------------|---------|------|-------|-----|--------|-----|---------|-----|-------|--------|------|--------|------|--------|------|------|
| QGNG 4 | 2696459 | 2536887.74 | 389963  | 1.04 | 8.938 | 1.7 | 5.0775 | 2.8 | 0.32931 | 2.2 | 0.798 | 1835   | 35.4 | 1832.4 | 23.6 | 1829.3 | 30.4 | -0.3 |
| QGNG 5 | 4908661 | 4618175.87 | 634517  | 1.17 | 8.883 | 1.5 | 5.1002 | 2.9 | 0.32872 | 2.5 | 0.854 | 1832.2 | 39.5 | 1836.1 | 24.6 | 1840.6 | 27.3 | 0.5  |
| QGNG 6 | 4038957 | 3799939.28 | 1510803 | 1.09 | 8.975 | 1.4 | 5.0787 | 2.7 | 0.33074 | 2.3 | 0.859 | 1842   | 36.7 | 1832.6 | 22.6 | 1821.9 | 24.7 | -1.1 |
| QGNG 7 | 2095970 | 1971934.52 | 5071078 | 1.01 | 8.896 | 1.8 | 5.1209 | 3.4 | 0.33055 | 2.9 | 0.854 | 1841.1 | 46.1 | 1839.6 | 28.6 | 1837.9 | 31.7 | -0.2 |
| QGNG 8 | 2888410 | 2717479.45 | 295038  | 1.11 | 8.94  | 1.3 | 5.0836 | 2.6 | 0.32978 | 2.3 | 0.872 | 1837.3 | 36.8 | 1833.4 | 22.4 | 1828.9 | 23.5 | -0.5 |
| QGNG 9 | 1650978 | 1553276.29 | 263603  | 1.2  | 8.898 | 1.7 | 5.1326 | 3.3 | 0.3314  | 2.8 | 0.862 | 1845.1 | 45.5 | 1841.5 | 27.9 | 1837.4 | 30.2 | -0.4 |

**QGNG no CA Run 2 (discordant)**

|         |         |            |        |      |       |     |       |     |         |     |       |        |    |        |      |        |      |     |
|---------|---------|------------|--------|------|-------|-----|-------|-----|---------|-----|-------|--------|----|--------|------|--------|------|-----|
| QGNG 17 | 3594349 | 3381642.33 | 289210 | 4.15 | 8.997 | 1.7 | 4.746 | 3.5 | 0.30982 | 3.1 | 0.872 | 1739.8 | 47 | 1775.4 | 29.6 | 1817.4 | 31.4 | 4.3 |
|---------|---------|------------|--------|------|-------|-----|-------|-----|---------|-----|-------|--------|----|--------|------|--------|------|-----|

**Composition**

**Ages**

| Zircon | U         | U (norm)  | 206Pb/ | U/Th | 206Pb/ | 2 $\sigma$ | 207Pb/ | 2 $\sigma$ | 206Pb/ | 2 $\sigma$ | Corr. | 206Pb/ | 2 $\sigma$ | 207Pb/ | 2 $\sigma$ | 206Pb/ | 2 $\sigma$ | %     |
|--------|-----------|-----------|--------|------|--------|------------|--------|------------|--------|------------|-------|--------|------------|--------|------------|--------|------------|-------|
| #      | (238 cps) | (238 cps) | 204Pb  |      | 207Pb  | (%)        | 235U   | (%)        | 238U   | (%)        |       | 238U   | (Ma)       | 235U   | (Ma)       | 207Pb  | (Ma)       | Disc. |

**QGNG CA Run 1**

|         |         |         |        |      |       |     |        |      |         |     |       |        |       |        |       |        |       |      |
|---------|---------|---------|--------|------|-------|-----|--------|------|---------|-----|-------|--------|-------|--------|-------|--------|-------|------|
| QGNG-1  | 1296464 | 1707156 | 29037  | 0.91 | 8.786 | 1.6 | 5.1309 | 3.1  | 0.32710 | 2.6 | 0.850 | 1824.3 | 41.5  | 1841.2 | 26.1  | 1860.4 | 29.3  | 1.9  |
| QGNG-2  | 1972067 | 2596775 | 31076  | 0.94 | 8.706 | 1.7 | 5.2726 | 3.9  | 0.33306 | 3.5 | 0.898 | 1853.2 | 56.0  | 1864.4 | 33.1  | 1877.0 | 30.8  | 1.3  |
| QGNG-3  | 1591100 | 2095127 | 35397  | 0.96 | 8.795 | 2.1 | 5.2086 | 3.7  | 0.33239 | 3.1 | 0.827 | 1850.0 | 49.1  | 1854.0 | 31.4  | 1858.5 | 37.4  | 0.5  |
| QGNG-4  | 1601975 | 2109447 | 21124  | 0.90 | 8.677 | 1.7 | 5.4000 | 2.7  | 0.33996 | 2.1 | 0.777 | 1886.5 | 34.8  | 1884.9 | 23.5  | 1883.0 | 31.1  | -0.2 |
| QGNG-5  | 1571752 | 2069649 | 40009  | 0.91 | 8.737 | 1.5 | 5.1811 | 3.3  | 0.32844 | 3.0 | 0.899 | 1830.8 | 47.6  | 1849.5 | 28.3  | 1870.6 | 26.2  | 2.1  |
| QGNG-6  | 1496707 | 1970832 | 33686  | 0.87 | 8.777 | 2.2 | 5.2402 | 3.7  | 0.33373 | 3.0 | 0.806 | 1856.4 | 47.8  | 1859.2 | 31.3  | 1862.2 | 39.3  | 0.3  |
| QGNG-7  | 1552118 | 2043796 | 225276 | 0.89 | 8.891 | 2.0 | 5.3316 | 3.6  | 0.34396 | 2.9 | 0.818 | 1905.7 | 48.1  | 1873.9 | 30.4  | 1838.9 | 37.1  | -3.6 |
| QGNG-8  | 1540773 | 2028858 | 32251  | 0.93 | 8.903 | 1.9 | 5.2285 | 3.6  | 0.33774 | 3.0 | 0.842 | 1875.8 | 49.5  | 1857.3 | 30.8  | 1836.6 | 35.3  | -2.1 |
| QGNG-9  | 1610543 | 2120730 | 49163  | 1.91 | 8.740 | 1.9 | 5.1309 | 3.3  | 0.32537 | 2.7 | 0.818 | 1815.9 | 42.8  | 1841.2 | 28.1  | 1870.0 | 34.3  | 2.9  |
| QGNG-10 | 1333028 | 1755304 | 67487  | 0.89 | 8.971 | 1.7 | 5.0897 | 3.1  | 0.33129 | 2.6 | 0.837 | 1844.6 | 42.1  | 1834.4 | 26.6  | 1822.8 | 31.1  | -1.2 |
| QGNG-11 | 1689282 | 2224411 | 463786 | 1.04 | 8.805 | 2.0 | 5.3309 | 3.5  | 0.34059 | 2.8 | 0.824 | 1889.5 | 46.6  | 1873.8 | 29.5  | 1856.5 | 35.4  | -1.8 |
| QGNG-12 | 1734017 | 2283317 | 190556 | 0.99 | 9.000 | 7.5 | 5.2330 | 12.3 | 0.34173 | 9.7 | 0.788 | 1895.0 | 158.7 | 1858.0 | 104.6 | 1816.8 | 137.0 | -4.3 |
| QGNG-13 | 3354364 | 4416956 | 125374 | 1.05 | 8.854 | 1.6 | 5.1468 | 3.2  | 0.33063 | 2.7 | 0.868 | 1841.5 | 43.9  | 1843.9 | 26.9  | 1846.6 | 28.3  | 0.3  |
| QGNG-14 | 2007478 | 2643405 | 268624 | 1.11 | 8.947 | 1.9 | 5.0102 | 4.2  | 0.32525 | 3.8 | 0.889 | 1815.3 | 59.7  | 1821.0 | 35.9  | 1827.6 | 35.3  | 0.7  |
| QGNG-15 | 942935  | 1241636 | 139272 | 1.50 | 8.927 | 1.8 | 5.1505 | 3.9  | 0.33362 | 3.5 | 0.886 | 1855.9 | 56.3  | 1844.5 | 33.5  | 1831.6 | 33.2  | -1.3 |

**QGNG CA Run 2**

|         |         |            |         |      |       |     |        |     |         |     |       |        |      |        |      |        |      |      |
|---------|---------|------------|---------|------|-------|-----|--------|-----|---------|-----|-------|--------|------|--------|------|--------|------|------|
| QGNG 1  | 2046813 | 1827045.84 | 242394  | 0.91 | 8.852 | 1.7 | 5.0799 | 3.2 | 0.32627 | 2.7 | 0.844 | 1820.3 | 42.2 | 1832.8 | 26.8 | 1846.9 | 30.6 | 1.4  |
| QGNG 10 | 4265785 | 3807765.91 | 363807  | 1.04 | 8.659 | 2.1 | 5.2189 | 3.3 | 0.32791 | 2.5 | 0.763 | 1828.2 | 40   | 1855.7 | 28.1 | 1886.6 | 38.3 | 3.1  |
| QGNG 11 | 1648727 | 1471702.5  | 295185  | 1.26 | 8.892 | 2.3 | 5.087  | 3.4 | 0.32822 | 2.5 | 0.742 | 1829.7 | 39.9 | 1833.9 | 28.6 | 1838.7 | 40.9 | 0.5  |
| QGNG 12 | 3393606 | 3029233.12 | 303681  | 1.03 | 8.786 | 1.9 | 5.1751 | 2.7 | 0.32991 | 1.9 | 0.719 | 1837.9 | 31   | 1848.5 | 22.9 | 1860.4 | 33.8 | 1.2  |
| QGNG 13 | 2518908 | 2248451.81 | 847690  | 0.96 | 8.81  | 2   | 5.1874 | 3.8 | 0.33161 | 3.2 | 0.846 | 1846.2 | 51   | 1850.6 | 31.9 | 1855.4 | 36.1 | 0.5  |
| QGNG 14 | 2144307 | 1914071.87 | 281250  | 1.22 | 8.72  | 1.7 | 5.2202 | 2.5 | 0.33031 | 1.9 | 0.734 | 1839.9 | 29.7 | 1855.9 | 21.5 | 1873.9 | 30.9 | 1.8  |
| QGNG 15 | 1832585 | 1635819.59 | 351882  | 1.16 | 8.807 | 1.9 | 5.1315 | 3.8 | 0.32792 | 3.3 | 0.874 | 1828.3 | 53.3 | 1841.3 | 32.5 | 1856.1 | 33.6 | 1.5  |
| QGNG 16 | 1212251 | 1082091.11 | 77864   | 1.28 | 8.937 | 2.7 | 5.161  | 3.8 | 0.33468 | 2.7 | 0.708 | 1861   | 43.7 | 1846.2 | 32.4 | 1829.6 | 48.8 | -1.7 |
| QGNG 17 | 916262  | 817882.571 | 46506   | 1.6  | 8.825 | 2   | 5.1902 | 3   | 0.33235 | 2.2 | 0.741 | 1849.8 | 36   | 1851   | 25.7 | 1852.4 | 36.6 | 0.1  |
| QGNG 18 | 970373  | 866183.651 | 123560  | 1.5  | 8.922 | 2.3 | 5.0714 | 3.8 | 0.32832 | 3.1 | 0.803 | 1830.2 | 48.9 | 1831.3 | 32.4 | 1832.6 | 41.2 | 0.1  |
| QGNG 19 | 2035551 | 1816993.05 | 1974075 | 0.93 | 8.777 | 1.7 | 5.1865 | 2.8 | 0.3303  | 2.2 | 0.8   | 1839.8 | 35.4 | 1850.4 | 23.5 | 1862.3 | 30   | 1.2  |
| QGNG 2  | 2054414 | 1833830.72 | 293341  | 0.87 | 8.78  | 1.7 | 5.1398 | 2.8 | 0.32745 | 2.2 | 0.796 | 1826   | 35.6 | 1842.7 | 23.9 | 1861.6 | 30.8 | 1.9  |
| QGNG 20 | 3100320 | 2767437.36 | 382626  | 1.44 | 8.831 | 1.8 | 5.1835 | 2.9 | 0.33214 | 2.3 | 0.787 | 1848.7 | 36.2 | 1849.9 | 24.4 | 1851.2 | 31.9 | 0.1  |
| QGNG 21 | 2025320 | 1807860.56 | 182898  | 1.34 | 8.875 | 1.9 | 5.1476 | 3.5 | 0.33147 | 3   | 0.849 | 1845.5 | 48.1 | 1844   | 30   | 1842.3 | 33.7 | -0.2 |
| QGNG 22 | 1267544 | 1131447.28 | 223726  | 0.96 | 8.798 | 2.2 | 5.1757 | 3.2 | 0.33041 | 2.4 | 0.739 | 1840.4 | 38.4 | 1848.6 | 27.6 | 1857.9 | 39.5 | 0.9  |

|         |         |            |         |      |       |     |        |     |         |     |       |        |      |        |      |        |      |      |
|---------|---------|------------|---------|------|-------|-----|--------|-----|---------|-----|-------|--------|------|--------|------|--------|------|------|
| QGNG 23 | 1584578 | 1414441.21 | 79324   | 1.2  | 8.816 | 2   | 5.1446 | 3.4 | 0.3291  | 2.7 | 0.797 | 1834   | 42.9 | 1843.5 | 28.7 | 1854.2 | 36.8 | 1.1  |
| QGNG 24 | 1958915 | 1748585.49 | 4599350 | 0.96 | 8.78  | 2.1 | 5.146  | 3.8 | 0.32784 | 3.1 | 0.83  | 1827.9 | 49.7 | 1843.7 | 32   | 1861.6 | 37.9 | 1.8  |
| QGNG 25 | 2891614 | 2581140.21 | 388013  | 0.98 | 8.695 | 1.9 | 5.1785 | 3.2 | 0.32673 | 2.6 | 0.805 | 1822.5 | 41.3 | 1849.1 | 27.5 | 1879.1 | 34.6 | 3.0  |
| QGNG 26 | 1643723 | 1467235.78 | 701467  | 1.08 | 8.712 | 2.2 | 5.1748 | 4.6 | 0.3271  | 4   | 0.877 | 1824.3 | 63.5 | 1848.5 | 38.8 | 1875.8 | 39.5 | 2.7  |
| QGNG 27 | 2383440 | 2127529.06 | 320002  | 1.03 | 8.749 | 2   | 5.173  | 3.3 | 0.32838 | 2.6 | 0.791 | 1830.5 | 41.6 | 1848.2 | 28.1 | 1868.1 | 36.5 | 2.0  |
| QGNG 28 | 2342551 | 2091030.33 | 463064  | 0.96 | 8.738 | 2.6 | 5.1578 | 4   | 0.32703 | 3   | 0.752 | 1824   | 47.7 | 1845.7 | 34   | 1870.2 | 47.5 | 2.5  |
| QGNG 29 | 1366306 | 1219605.16 | 398650  | 1.12 | 8.791 | 2.1 | 5.1155 | 3.4 | 0.32631 | 2.7 | 0.79  | 1820.5 | 43.1 | 1838.7 | 29.3 | 1859.3 | 38.2 | 2.1  |
| QGNG 3  | 1215530 | 1085018.04 | 73003   | 1.71 | 8.864 | 1.8 | 5.0454 | 3.3 | 0.3245  | 2.8 | 0.847 | 1811.6 | 44.3 | 1827   | 28   | 1844.5 | 31.8 | 1.8  |
| QGNG 30 | 1888941 | 1686124.63 | 2296251 | 0.9  | 8.754 | 2.2 | 5.1148 | 3.7 | 0.3249  | 2.9 | 0.794 | 1813.6 | 45.9 | 1838.6 | 31.1 | 1866.9 | 40.1 | 2.9  |
| QGNG 4  | 1693446 | 1511620    | 581358  | 0.95 | 8.703 | 1.6 | 5.1439 | 2.6 | 0.32485 | 2.1 | 0.796 | 1813.3 | 33.1 | 1843.4 | 22.4 | 1877.5 | 28.7 | 3.4  |
| QGNG 5  | 2427761 | 2167091.3  | 133378  | 0.95 | 8.771 | 1.6 | 5.1565 | 2.9 | 0.32816 | 2.4 | 0.833 | 1829.4 | 38.9 | 1845.5 | 24.9 | 1863.6 | 29.3 | 1.8  |
| QGNG 6  | 2432919 | 2171695.48 | 247548  | 0.97 | 8.812 | 1.9 | 5.1355 | 3.1 | 0.32835 | 2.5 | 0.804 | 1830.4 | 40   | 1842   | 26.5 | 1855.1 | 33.6 | 1.3  |
| QGNG 7  | 2181625 | 1947383.02 | 1161604 | 0.9  | 8.865 | 2.2 | 5.161  | 3.7 | 0.33197 | 2.9 | 0.796 | 1847.9 | 46.8 | 1846.2 | 31.1 | 1844.3 | 40.1 | -0.2 |
| QGNG 8  | 4399126 | 3926790.03 | 386689  | 1.41 | 8.72  | 2.3 | 5.1169 | 3.3 | 0.32375 | 2.4 | 0.72  | 1808   | 37.5 | 1838.9 | 28.1 | 1874.1 | 41.3 | 3.5  |
| QGNG 9  | 3570015 | 3186701.02 | 1439528 | 1.04 | 8.838 | 2.2 | 5.1751 | 3.3 | 0.33186 | 2.5 | 0.744 | 1847.4 | 39.5 | 1848.5 | 28.1 | 1849.8 | 39.9 | 0.1  |

**TABLE S13: OG1 LA-ICPMS U-Pb ZIRCON GEOCHRONOLOGY**

| Zircon #               | Composition    |                       |                 |      |                 |        |                |        |                |        | Ages           |                |         |                |         |                 |         |            |
|------------------------|----------------|-----------------------|-----------------|------|-----------------|--------|----------------|--------|----------------|--------|----------------|----------------|---------|----------------|---------|-----------------|---------|------------|
|                        | U<br>(238 cps) | U (norm)<br>(238 cps) | 206Pb/<br>204Pb | U/Th | 206Pb/<br>207Pb | 2σ (%) | 207Pb/<br>235U | 2σ (%) | 206Pb/<br>238U | 2σ (%) | Error<br>Corr. | 206Pb/<br>238U | 2σ (Ma) | 207Pb/<br>235U | 2σ (Ma) | 206Pb/<br>207Pb | 2σ (Ma) | %<br>Disc. |
| <b>OG1 no CA Run 1</b> |                |                       |                 |      |                 |        |                |        |                |        |                |                |         |                |         |                 |         |            |
| OG-1-1                 | 650431.2       | 744031                | 31041           | 1.60 | 3.371           | 1.3    | 29.9557        | 2.8    | 0.73268        | 2.5    | 0.892          | 3543.4         | 68.7    | 3485.4         | 27.8    | 3452.2          | 19.8    | -2.6       |
| OG-1-2                 | 1472730        | 1684662               | 36470           | 1.66 | 3.287           | 1.6    | 29.6563        | 3.0    | 0.70724        | 2.6    | 0.843          | 3448.0         | 68.4    | 3475.5         | 29.9    | 3491.3          | 25.3    | 1.2        |
| OG-1-3                 | 1444224        | 1652054               | 389311          | 0.99 | 3.331           | 1.3    | 29.3484        | 3.0    | 0.70940        | 2.6    | 0.892          | 3456.2         | 70.5    | 3465.2         | 29.0    | 3470.5          | 20.6    | 0.4        |
| OG-1-4                 | 1419224        | 1623456               | 40292           | 1.60 | 3.373           | 1.6    | 29.5789        | 3.1    | 0.72391        | 2.7    | 0.850          | 3510.7         | 71.9    | 3472.9         | 30.7    | 3451.2          | 25.5    | -1.7       |
| OG-1-5                 | 1097197        | 1255089               | 81494           | 1.21 | 3.345           | 1.2    | 29.0931        | 2.9    | 0.70611        | 2.7    | 0.908          | 3443.8         | 71.0    | 3456.7         | 28.8    | 3464.1          | 19.0    | 0.6        |
| OG-1-6                 | 923216         | 1056071               | 38584           | 1.13 | 3.331           | 1.6    | 30.5919        | 3.0    | 0.73928        | 2.5    | 0.846          | 3567.9         | 68.4    | 3506.0         | 29.0    | 3470.8          | 24.3    | -2.8       |
| OG-1-7                 | 949761.5       | 1086436               | 56194           | 1.12 | 3.320           | 1.7    | 29.1868        | 3.1    | 0.70315        | 2.6    | 0.843          | 3432.6         | 69.6    | 3459.8         | 30.5    | 3475.6          | 25.9    | 1.2        |
| OG-1-8                 | 1299107        | 1486053               | 46190           | 2.12 | 3.360           | 1.8    | 29.1605        | 3.5    | 0.71084        | 3.0    | 0.866          | 3461.6         | 81.6    | 3458.9         | 34.5    | 3457.4          | 27.2    | -0.1       |
| OG-1-9                 | 1244193        | 1423238               | 32896           | 0.97 | 3.350           | 1.6    | 30.2669        | 3.4    | 0.73578        | 2.9    | 0.875          | 3554.9         | 80.3    | 3495.5         | 33.0    | 3461.6          | 25.2    | -2.7       |
| OG-1-10                | 1048424        | 1199297               | 34149131        | 1.78 | 3.335           | 1.7    | 29.2525        | 3.0    | 0.70782        | 2.5    | 0.828          | 3450.2         | 66.5    | 3462.0         | 29.5    | 3468.9          | 26.1    | 0.5        |
| OG-1-11                | 1087573        | 1244079               | 56427           | 1.03 | 3.382           | 1.6    | 29.4470        | 3.1    | 0.72260        | 2.7    | 0.862          | 3505.8         | 71.9    | 3468.5         | 30.3    | 3447.1          | 24.2    | -1.7       |
| OG-1-12                | 946857.6       | 1083114               | 39078           | 1.24 | 3.342           | 1.7    | 29.1036        | 3.2    | 0.70576        | 2.8    | 0.857          | 3442.5         | 73.4    | 3457.0         | 31.5    | 3465.5          | 25.6    | 0.7        |
| OG-1-13                | 721008.1       | 824764                | 490223          | 1.82 | 3.381           | 1.8    | 27.9712        | 3.7    | 0.68619        | 3.3    | 0.878          | 3368.1         | 85.6    | 3418.1         | 36.5    | 3447.5          | 27.6    | 2.3        |
| OG-1-14                | 1198792        | 1371303               | 106206          | 0.96 | 3.360           | 1.3    | 30.0052        | 3.0    | 0.73141        | 2.7    | 0.897          | 3538.7         | 74.1    | 3487.0         | 29.8    | 3457.4          | 20.7    | -2.4       |
| OG-1-15                | 2049650        | 2344603               | 82184           | 0.78 | 3.361           | 2.4    | 30.0373        | 4.1    | 0.73247        | 3.3    | 0.815          | 3542.6         | 90.5    | 3488.0         | 40.0    | 3456.8          | 36.6    | -2.5       |
| <b>OG1 no CA Run 2</b> |                |                       |                 |      |                 |        |                |        |                |        |                |                |         |                |         |                 |         |            |
| OG-1 1                 | 1771343        | 1666518.3             | 1456089         | 1.21 | 3.503           | 1.7    | 27.0289        | 3.4    | 0.68709        | 2.9    | 0.861          | 3371.5         | 77.2    | 3384.5         | 33.4    | 3392.2          | 27      | 0.6        |
| OG-1 10                | 1743997        | 1640790.6             | 732527          | 1.08 | 3.448           | 1.7    | 27.9491        | 3.3    | 0.69928        | 2.9    | 0.862          | 3417.9         | 75.9    | 3417.3         | 32.6    | 3416.9          | 26.2    | 0.0        |
| OG-1 11                | 1208053        | 1136562.7             | 189122          | 1.29 | 3.498           | 1.6    | 26.5579        | 3.6    | 0.67403        | 3.2    | 0.898          | 3321.4         | 84      | 3367.3         | 35.3    | 3394.7          | 24.7    | 2.2        |
| OG-1 12                | 1749856        | 1646302.9             | 12448337        | 0.81 | 3.488           | 1.8    | 28.6768        | 3.7    | 0.72568        | 3.2    | 0.878          | 3517.3         | 88      | 3442.5         | 36.3    | 3399.3          | 27.6    | -3.5       |
| OG-1 13                | 1962948        | 1846784.5             | 333264          | 1.07 | 3.5             | 1.7    | 27.4592        | 3.1    | 0.69725        | 2.5    | 0.823          | 3410.2         | 66.7    | 3400           | 30      | 3393.9          | 27      | -0.5       |
| OG-1 14                | 1176969        | 1107318.2             | 1972914         | 2.04 | 3.425           | 2.1    | 28.3406        | 4      | 0.70441        | 3.4    | 0.853          | 3437.4         | 90.8    | 3431           | 39.2    | 3427.2          | 32.4    | -0.3       |
| OG-1 15                | 1251234        | 1177188.4             | 2672274         | 1.33 | 3.44            | 1.7    | 27.7134        | 3.1    | 0.69169        | 2.6    | 0.839          | 3389           | 68      | 3409           | 30.1    | 3420.8          | 26      | 0.9        |
| OG-1 16                | 1349273        | 1269425.6             | 7947051         | 2.07 | 3.435           | 2.1    | 27.9595        | 4.1    | 0.69686        | 3.5    | 0.851          | 3408.7         | 91.6    | 3417.7         | 39.9    | 3422.9          | 33.2    | 0.4        |
| OG-1 17                | 1291939        | 1215484.5             | 1033510         | 1.26 | 3.46            | 2      | 27.7295        | 3.6    | 0.69615        | 3      | 0.834          | 3406           | 79      | 3409.6         | 35.1    | 3411.6          | 30.7    | 0.2        |
| OG-1 18                | 1221882        | 1149573.4             | 1644932         | 1.52 | 3.42            | 1.9    | 28.4781        | 3.4    | 0.70672        | 2.8    | 0.828          | 3446.1         | 75.1    | 3435.7         | 33.3    | 3429.6          | 29.6    | -0.5       |
| OG-1 19                | 1274059        | 1198662.6             | 283161          | 1.57 | 3.43            | 1.5    | 28.5432        | 2.9    | 0.71046        | 2.5    | 0.852          | 3460.2         | 65.7    | 3437.9         | 28.2    | 3425            | 23.5    | -1.0       |
| OG-1 2                 | 692195         | 651232.23             | 392504          | 1.7  | 3.413           | 1.9    | 28.9708        | 3.9    | 0.71737        | 3.4    | 0.87           | 3486.2         | 90.9    | 3452.5         | 38.1    | 3433.1          | 29.8    | -1.5       |
| OG-1 20                | 1364062        | 1283339.4             | 8027831         | 2.32 | 3.466           | 1.5    | 28.0342        | 3.2    | 0.70508        | 2.8    | 0.878          | 3439.9         | 74.4    | 3420.3         | 31.2    | 3408.8          | 23.7    | -0.9       |
| OG-1 21                | 1494472        | 1406032               | 320372          | 1.28 | 3.48            | 1.5    | 27.522         | 3.1    | 0.6949         | 2.7    | 0.882          | 3401.3         | 72.3    | 3402.2         | 30.4    | 3402.7          | 22.8    | 0.0        |
| OG-1 22                | 2374689        | 2234159.5             | 244000          | 1.05 | 3.506           | 1.5    | 27.2082        | 2.9    | 0.69224        | 2.5    | 0.856          | 3391.2         | 65.8    | 3391           | 28.5    | 3390.9          | 23.4    | 0.0        |
| OG-1 23                | 1043721        | 981955.6              | 1129186         | 1.86 | 3.443           | 1.6    | 28.2374        | 3      | 0.70537        | 2.6    | 0.851          | 3441           | 68.4    | 3427.4         | 29.6    | 3419.4          | 24.6    | -0.6       |
| OG-1 24                | 1538701        | 1447643.6             | 220508          | 0.96 | 3.468           | 2.2    | 27.7448        | 4      | 0.69814        | 3.4    | 0.833          | 3413.6         | 89.1    | 3410.1         | 39.6    | 3408.1          | 34.8    | -0.2       |
| OG-1 25                | 2373033        | 2232601.5             | 176861          | 0.93 | 3.542           | 1      | 26.768         | 2.1    | 0.68799        | 1.9    | 0.873          | 3375           | 48.8    | 3375           | 20.8    | 3375            | 16.2    | 0.0        |
| OG-1 26                | 1587268        | 1493336.5             | 415488          | 1.15 | 3.483           | 1.4    | 27.4646        | 2.6    | 0.69414        | 2.2    | 0.837          | 3398.4         | 58.4    | 3400.2         | 25.9    | 3401.2          | 22.5    | 0.1        |
| OG-1 27                | 1044399        | 982593.47             | 254817          | 2.97 | 3.451           | 1.8    | 27.3878        | 3      | 0.68588        | 2.4    | 0.793          | 3366.9         | 62.7    | 3397.4         | 29.5    | 3415.5          | 28.6    | 1.4        |
| OG-1 28                | 1319513        | 1241426.8             | 314606          | 1.85 | 3.462           | 1.7    | 27.9509        | 3.1    | 0.70215        | 2.6    | 0.841          | 3428.8         | 70.1    | 3417.4         | 30.7    | 3410.7          | 26.4    | -0.5       |
| OG-1 29                | 1231652        | 1158765.2             | 11011109        | 1.43 | 3.441           | 2      | 28.2678        | 3.2    | 0.70578        | 2.5    | 0.79           | 3442.5         | 68      | 3428.4         | 31.7    | 3420.2          | 30.8    | -0.7       |



|         |         |           |          |      |       |     |         |     |         |     |       |        |      |        |      |        |      |      |
|---------|---------|-----------|----------|------|-------|-----|---------|-----|---------|-----|-------|--------|------|--------|------|--------|------|------|
| OG-1 3  | 1579605 | 1486127   | 173329   | 1.35 | 3.481 | 1.7 | 27.3708 | 3.5 | 0.69135 | 3   | 0.866 | 3387.8 | 78.9 | 3396.8 | 33.9 | 3402.2 | 26.9 | 0.4  |
| OG-1 30 | 1367476 | 1286551.4 | 364464   | 2    | 3.459 | 2   | 27.5723 | 2.8 | 0.69193 | 1.9 | 0.702 | 3390   | 51.1 | 3404   | 27.1 | 3412.3 | 30.6 | 0.7  |
| OG-1 4  | 1065825 | 1002751.5 | 1140402  | 1.88 | 3.441 | 1.5 | 28.094  | 3.7 | 0.70149 | 3.3 | 0.908 | 3426.3 | 88.8 | 3422.4 | 36.1 | 3420.1 | 24   | -0.2 |
| OG-1 5  | 2424363 | 2280893.9 | 14853207 | 0.98 | 3.569 | 2   | 27.2014 | 3.6 | 0.70449 | 3   | 0.829 | 3437.7 | 79.2 | 3390.7 | 35.1 | 3363.1 | 31.3 | -2.2 |
| OG-1 6  | 2121288 | 1995754.3 | 790308   | 0.96 | 3.515 | 1.5 | 26.9445 | 3.2 | 0.68724 | 2.8 | 0.881 | 3372.1 | 74.8 | 3381.4 | 31.7 | 3387   | 23.8 | 0.4  |
| OG-1 7  | 1863535 | 1753254.6 | 3914788  | 1.2  | 3.508 | 2   | 27.2128 | 3.3 | 0.69264 | 2.6 | 0.791 | 3392.7 | 68.2 | 3391.2 | 32   | 3390.2 | 31.2 | -0.1 |
| OG-1 8  | 1852991 | 1743334.6 | 541263   | 1.14 | 3.501 | 1.8 | 27.4365 | 3.7 | 0.69703 | 3.3 | 0.877 | 3409.4 | 86.1 | 3399.2 | 36.3 | 3393.2 | 27.8 | -0.5 |
| OG-1 9  | 1067249 | 1004091.3 | 192062   | 1.22 | 3.45  | 1.8 | 27.7848 | 3.7 | 0.6955  | 3.2 | 0.871 | 3403.6 | 85.5 | 3411.5 | 36.4 | 3416.2 | 28.4 | 0.4  |

**Composition**

**Ages**

| Zircon | U         | U (norm)  | 206Pb/ | U/Th | 206Pb/ | 2σ  | 207Pb/ | 2σ  | 206Pb/ | 2σ  | Error | 206Pb/ | 2σ   | 207Pb/ | 2σ   | 206Pb/ | 2σ   | %     |
|--------|-----------|-----------|--------|------|--------|-----|--------|-----|--------|-----|-------|--------|------|--------|------|--------|------|-------|
| #      | (238 cps) | (238 cps) | 204Pb  |      | 207Pb  | (%) | 235U   | (%) | 238U   | (%) | Corr. | 238U   | (Ma) | 235U   | (Ma) | 207Pb  | (Ma) | Disc. |

**OG1 CA Run 1**

|         |          |         |         |      |       |     |         |     |         |     |       |        |       |        |      |        |      |     |
|---------|----------|---------|---------|------|-------|-----|---------|-----|---------|-----|-------|--------|-------|--------|------|--------|------|-----|
| OG-1-1  | 1110329  | 1462057 | 72506   | 1.08 | 3.276 | 1.8 | 28.6802 | 3.1 | 0.68169 | 2.5 | 0.815 | 3350.9 | 65.6  | 3442.6 | 30.2 | 3496.5 | 27.6 | 4.2 |
| OG-1-2  | 1070087  | 1409068 | 77233   | 2.00 | 3.297 | 1.9 | 29.7917 | 3.3 | 0.71275 | 2.7 | 0.807 | 3468.8 | 71.1  | 3480.0 | 32.3 | 3486.4 | 30.0 | 0.5 |
| OG-1-3  | 1032081  | 1359022 | 31715   | 1.01 | 3.295 | 2.0 | 29.3078 | 4.3 | 0.70073 | 3.8 | 0.881 | 3423.4 | 101.2 | 3463.9 | 42.5 | 3487.4 | 31.7 | 1.8 |
| OG-1-4  | 1179100  | 1552614 | 24627   | 1.02 | 3.283 | 1.8 | 29.7451 | 3.8 | 0.70849 | 3.3 | 0.877 | 3452.8 | 87.9  | 3478.4 | 36.8 | 3493.2 | 27.9 | 1.2 |
| OG-1-5  | 1305811  | 1719464 | 63669   | 0.87 | 3.288 | 1.7 | 28.7367 | 3.5 | 0.68558 | 3.1 | 0.880 | 3365.7 | 80.7  | 3444.6 | 34.4 | 3490.7 | 25.8 | 3.6 |
| OG-1-6  | 936360.5 | 1232980 | 43529   | 1.07 | 3.293 | 1.8 | 29.4500 | 3.3 | 0.70375 | 2.8 | 0.835 | 3434.9 | 73.7  | 3468.6 | 32.6 | 3488.2 | 28.2 | 1.5 |
| OG-1-7  | 1195992  | 1574858 | 164076  | 0.88 | 3.319 | 1.5 | 28.2929 | 3.2 | 0.68140 | 2.8 | 0.881 | 3349.7 | 73.4  | 3429.3 | 31.3 | 3476.1 | 23.4 | 3.6 |
| OG-1-8  | 865693.2 | 1139926 | 31108   | 1.99 | 3.311 | 1.9 | 29.4110 | 3.4 | 0.70660 | 2.8 | 0.825 | 3445.6 | 74.8  | 3467.3 | 33.4 | 3479.9 | 29.7 | 1.0 |
| OG-1-9  | 909458   | 1197555 | 145609  | 0.88 | 3.347 | 1.7 | 27.9691 | 4.4 | 0.67927 | 4.1 | 0.926 | 3341.6 | 105.7 | 3418.0 | 42.9 | 3463.1 | 25.7 | 3.5 |
| OG-1-10 | 808327.7 | 1064389 | 2208756 | 1.06 | 3.320 | 1.4 | 28.7629 | 2.9 | 0.69287 | 2.5 | 0.877 | 3393.6 | 67.3  | 3445.5 | 28.5 | 3475.8 | 21.7 | 2.4 |
| OG-1-12 | 1286464  | 1693988 | 61601   | 1.65 | 3.327 | 2.2 | 29.3154 | 3.9 | 0.70758 | 3.3 | 0.835 | 3449.3 | 87.4  | 3464.1 | 38.5 | 3472.7 | 33.5 | 0.7 |
| OG-1-13 | 973805.8 | 1282287 | 35636   | 1.25 | 3.330 | 1.8 | 28.4372 | 3.6 | 0.68719 | 3.1 | 0.869 | 3371.9 | 82.3  | 3434.3 | 35.4 | 3470.9 | 27.6 | 2.9 |
| OG-1-14 | 627634.1 | 826455  | 61923   | 1.48 | 3.370 | 1.9 | 28.5770 | 3.5 | 0.69869 | 2.9 | 0.835 | 3415.7 | 76.5  | 3439.1 | 33.9 | 3452.8 | 29.5 | 1.1 |
| OG-1-15 | 733860.8 | 966332  | 28665   | 1.87 | 3.359 | 1.5 | 28.4023 | 3.0 | 0.69213 | 2.5 | 0.858 | 3390.7 | 66.8  | 3433.1 | 29.0 | 3457.9 | 23.5 | 1.9 |

**OG1 CA Run 1 (discordant)**

|         |         |         |       |      |        |     |        |     |         |     |       |       |      |       |      |       |      |      |
|---------|---------|---------|-------|------|--------|-----|--------|-----|---------|-----|-------|-------|------|-------|------|-------|------|------|
| OG-1-11 | 4954430 | 6523888 | 25627 | 5.50 | 17.040 | 2.1 | 0.7325 | 3.4 | 0.09056 | 2.8 | 0.802 | 558.9 | 14.8 | 558.0 | 14.8 | 554.4 | 44.8 | -0.8 |
|---------|---------|---------|-------|------|--------|-----|--------|-----|---------|-----|-------|-------|------|-------|------|-------|------|------|

**OG1 CA Run 2**

|         |         |           |          |      |       |     |         |     |         |     |       |        |       |        |      |        |      |      |
|---------|---------|-----------|----------|------|-------|-----|---------|-----|---------|-----|-------|--------|-------|--------|------|--------|------|------|
| OG-1 1  | 1768903 | 1578975.2 | 2134663  | 1.04 | 3.355 | 1.7 | 29.0162 | 3.7 | 0.70631 | 3.3 | 0.883 | 3444.5 | 87    | 3454.1 | 36.2 | 3459.6 | 26.9 | 0.4  |
| OG-1 10 | 892235  | 796435.36 | 137257   | 1.11 | 3.373 | 2.2 | 29.2304 | 4.3 | 0.71536 | 3.7 | 0.862 | 3478.6 | 98.9  | 3461.3 | 41.9 | 3451.3 | 33.5 | -0.8 |
| OG-1 11 | 1237821 | 1104915.6 | 1739853  | 1.7  | 3.413 | 2.4 | 29.145  | 4.3 | 0.72171 | 3.5 | 0.828 | 3502.4 | 95.6  | 3458.4 | 42   | 3433   | 37.3 | -2.0 |
| OG-1 12 | 1499499 | 1338497.2 | 29212251 | 2.02 | 3.357 | 2.1 | 29.2441 | 3.4 | 0.71236 | 2.7 | 0.782 | 3467.4 | 71.3  | 3461.7 | 33.4 | 3458.5 | 32.8 | -0.3 |
| OG-1 13 | 1346007 | 1201485.7 | 1625390  | 1.25 | 3.349 | 1.5 | 29.4544 | 3.9 | 0.71581 | 3.6 | 0.923 | 3480.3 | 97.2  | 3468.8 | 38.4 | 3462.1 | 23.3 | -0.5 |
| OG-1 14 | 822084  | 733816.5  | 118534   | 1.4  | 3.377 | 1.6 | 29.8246 | 4.1 | 0.73083 | 3.7 | 0.918 | 3536.5 | 101.9 | 3481.1 | 40.1 | 3449.3 | 25.1 | -2.5 |
| OG-1 15 | 935800  | 835322.77 | 141581   | 1.54 | 3.351 | 1.9 | 29.4882 | 3   | 0.71693 | 2.3 | 0.777 | 3484.5 | 63.2  | 3469.9 | 29.6 | 3461.5 | 29.4 | -0.7 |
| OG-1 16 | 1194016 | 1065814   | 125951   | 1.13 | 3.417 | 1.6 | 28.7861 | 3.7 | 0.7137  | 3.3 | 0.897 | 3472.4 | 88    | 3446.3 | 35.9 | 3431.1 | 25.1 | -1.2 |
| OG-1 17 | 1649325 | 1472236.3 | 387267   | 1.07 | 3.386 | 2.1 | 28.897  | 3.1 | 0.70995 | 2.3 | 0.739 | 3458.3 | 61.3  | 3450   | 30.4 | 3445.2 | 32.4 | -0.4 |
| OG-1 18 | 759591  | 678033.4  | 339147   | 1.6  | 3.363 | 1.5 | 29.9107 | 4   | 0.7299  | 3.7 | 0.925 | 3533   | 100.6 | 3483.9 | 39.3 | 3455.7 | 23.6 | -2.2 |
| OG-1 19 | 1467449 | 1309888.4 | 313161   | 1.3  | 3.33  | 1.4 | 29.5722 | 2.8 | 0.71462 | 2.5 | 0.87  | 3475.9 | 66    | 3472.7 | 27.8 | 3470.9 | 21.6 | -0.1 |
| OG-1 2  | 1051880 | 938939.21 | 1602974  | 1.37 | 3.374 | 1.5 | 29.1643 | 3.3 | 0.71409 | 3   | 0.894 | 3473.9 | 79.3  | 3459.1 | 32.4 | 3450.5 | 23   | -0.7 |
| OG-1 20 | 1117170 | 997219    | 349233   | 1.83 | 3.347 | 1.8 | 29.7542 | 3.4 | 0.72257 | 2.9 | 0.858 | 3505.7 | 79.3  | 3478.7 | 33.6 | 3463.2 | 27.2 | -1.2 |
| OG-1 21 | 859900  | 767572.18 | 382743   | 1.19 | 3.373 | 1.5 | 29.019  | 3   | 0.71015 | 2.6 | 0.868 | 3459   | 70.5  | 3454.2 | 29.8 | 3451.3 | 23.3 | -0.2 |

|         |         |           |        |      |       |     |         |     |         |     |       |        |      |        |      |        |      |     |
|---------|---------|-----------|--------|------|-------|-----|---------|-----|---------|-----|-------|--------|------|--------|------|--------|------|-----|
| OG-1 22 | 2293806 | 2047519.1 | 616713 | 0.79 | 3.341 | 1.5 | 28.9015 | 2.4 | 0.70062 | 1.9 | 0.772 | 3423   | 49.4 | 3450.2 | 23.7 | 3466   | 23.7 | 1.2 |
| OG-1 23 | 2138041 | 1908478.7 | 576063 | 0.82 | 3.373 | 1.8 | 28.4621 | 3.4 | 0.69658 | 2.8 | 0.838 | 3407.7 | 74.7 | 3435.1 | 33   | 3451.2 | 28.5 | 1.3 |
| OG-1 24 | 1077348 | 961672.7  | 371690 | 1.78 | 3.374 | 1.3 | 28.8363 | 3   | 0.70594 | 2.7 | 0.901 | 3443.1 | 72   | 3448   | 29.4 | 3450.8 | 20.2 | 0.2 |
| OG-1 25 | 1506216 | 1344493   | 701733 | 0.95 | 3.376 | 2.1 | 28.5796 | 3.3 | 0.70019 | 2.5 | 0.758 | 3421.4 | 65.5 | 3439.2 | 31.9 | 3449.6 | 32.9 | 0.8 |
| OG-1 26 | 1698773 | 1516375   | 830019 | 1.86 | 3.354 | 1.6 | 29.0407 | 2.8 | 0.7068  | 2.4 | 0.837 | 3446.4 | 63.6 | 3454.9 | 27.9 | 3459.8 | 24.1 | 0.4 |
| OG-1 27 | 1451921 | 1296027.6 | 777709 | 0.94 | 3.361 | 1.7 | 29.0183 | 2.7 | 0.70768 | 2.1 | 0.789 | 3449.7 | 56.7 | 3454.1 | 26.4 | 3456.7 | 25.6 | 0.2 |
| OG-1 28 | 1062091 | 948053.85 | 308155 | 1    | 3.354 | 1.3 | 28.2759 | 3.3 | 0.68814 | 3   | 0.914 | 3375.5 | 78.5 | 3428.7 | 32.1 | 3459.9 | 20.5 | 2.4 |
| OG-1 29 | 2136179 | 1906816.6 | 718523 | 1.17 | 3.34  | 2.1 | 28.1684 | 3.7 | 0.68275 | 3.1 | 0.823 | 3354.9 | 80.5 | 3425   | 36.7 | 3466.2 | 32.9 | 3.2 |
| OG-1 3  | 1688997 | 1507648.7 | 672577 | 0.92 | 3.309 | 1.8 | 28.7723 | 3.5 | 0.69081 | 3   | 0.851 | 3385.7 | 78.6 | 3445.8 | 34.4 | 3480.9 | 28.5 | 2.7 |
| OG-1 30 | 1807283 | 1613234.3 | 308037 | 0.93 | 3.374 | 1.5 | 28.6633 | 3.3 | 0.70177 | 3   | 0.899 | 3427.4 | 79.5 | 3442.1 | 32.6 | 3450.6 | 22.6 | 0.7 |
| OG-1 4  | 935574  | 835121.03 | 267750 | 1.31 | 3.389 | 2.1 | 28.6482 | 4.1 | 0.70441 | 3.6 | 0.867 | 3437.3 | 95.3 | 3441.5 | 40.5 | 3444   | 31.9 | 0.2 |
| OG-1 5  | 1742081 | 1555033   | 490462 | 1.4  | 3.341 | 1.4 | 29.2091 | 2.9 | 0.70813 | 2.5 | 0.876 | 3451.4 | 67.6 | 3460.6 | 28.4 | 3465.9 | 21.6 | 0.4 |
| OG-1 6  | 1553271 | 1386495.7 | 342434 | 1.82 | 3.324 | 1.9 | 28.6873 | 3.5 | 0.69195 | 2.9 | 0.829 | 3390.1 | 75.7 | 3442.9 | 34   | 3473.7 | 30   | 2.4 |
| OG-1 7  | 1161156 | 1036482.2 | 196016 | 1.81 | 3.35  | 2   | 28.5833 | 3   | 0.69478 | 2.3 | 0.75  | 3400.8 | 60.4 | 3439.3 | 29.9 | 3461.8 | 31.2 | 1.8 |
| OG-1 8  | 1291113 | 1152485.7 | 316443 | 1.92 | 3.337 | 2.1 | 28.606  | 3.2 | 0.69262 | 2.5 | 0.767 | 3392.6 | 65.1 | 3440.1 | 31.6 | 3467.9 | 32.1 | 2.2 |
| OG-1 9  | 2060584 | 1839338.2 | 311377 | 1.23 | 3.352 | 1.9 | 28.8112 | 3.1 | 0.7008  | 2.5 | 0.791 | 3423.7 | 66.1 | 3447.1 | 30.9 | 3460.7 | 29.8 | 1.1 |

### Uranium (238 cps) normalization to SLF

Uranium concentrations (ppm) reported from routine U-Pb LA-ICP-MS zircon analyses at ALC are semiquantitative and calibrated by bracketing unknowns with analyses of reference materials with a known average U concentration. However, since chemical abrasion selectively dissolves high-uranium zones, and thus modifies the average U concentration of reference materials by an unquantified amount, the reported U concentration values for reference materials analyzed by traditional (non-CA) ID-TIMS may no longer be valid. We found that the primary reference material SLF had homogenous  $^{238}\text{U}$  cps (counts per second) within individual sessions (Figs. S15-S17) for both the CA and non-CA runs. We interpret this to mean that SLF has a homogenous U concentration (and radiation damage) and that any differences in  $^{238}\text{U}$  cps for SLF between different analytical sessions are related to changes in the instrument's sensitivity. As such, we normalize the  $^{238}\text{U}$  cps for all other grains analyzed in each session to the average  $^{238}\text{U}$  cps of SLF across all sessions. Given the potential difference between chemically abraded and untreated SLF U concentrations, we did this correction independently for treated and untreated grains. Since we do not have U concentration values for treated and untreated SLF, we center our discussions on relative differences in U concentration as estimated using the intensity (in cps) of the  $^{238}\text{U}$  beam, rather than quantifying U concentrations.

Figure S18 shows detrital zircon samples NM8A and Rora Med normalized  $^{238}\text{U}$  cps values plotted against  $\text{Pb}^*/\text{Pbc}$  ratios.

### Primary Reference Materials During Round Robin

● No CA aliquot ● CA aliquot

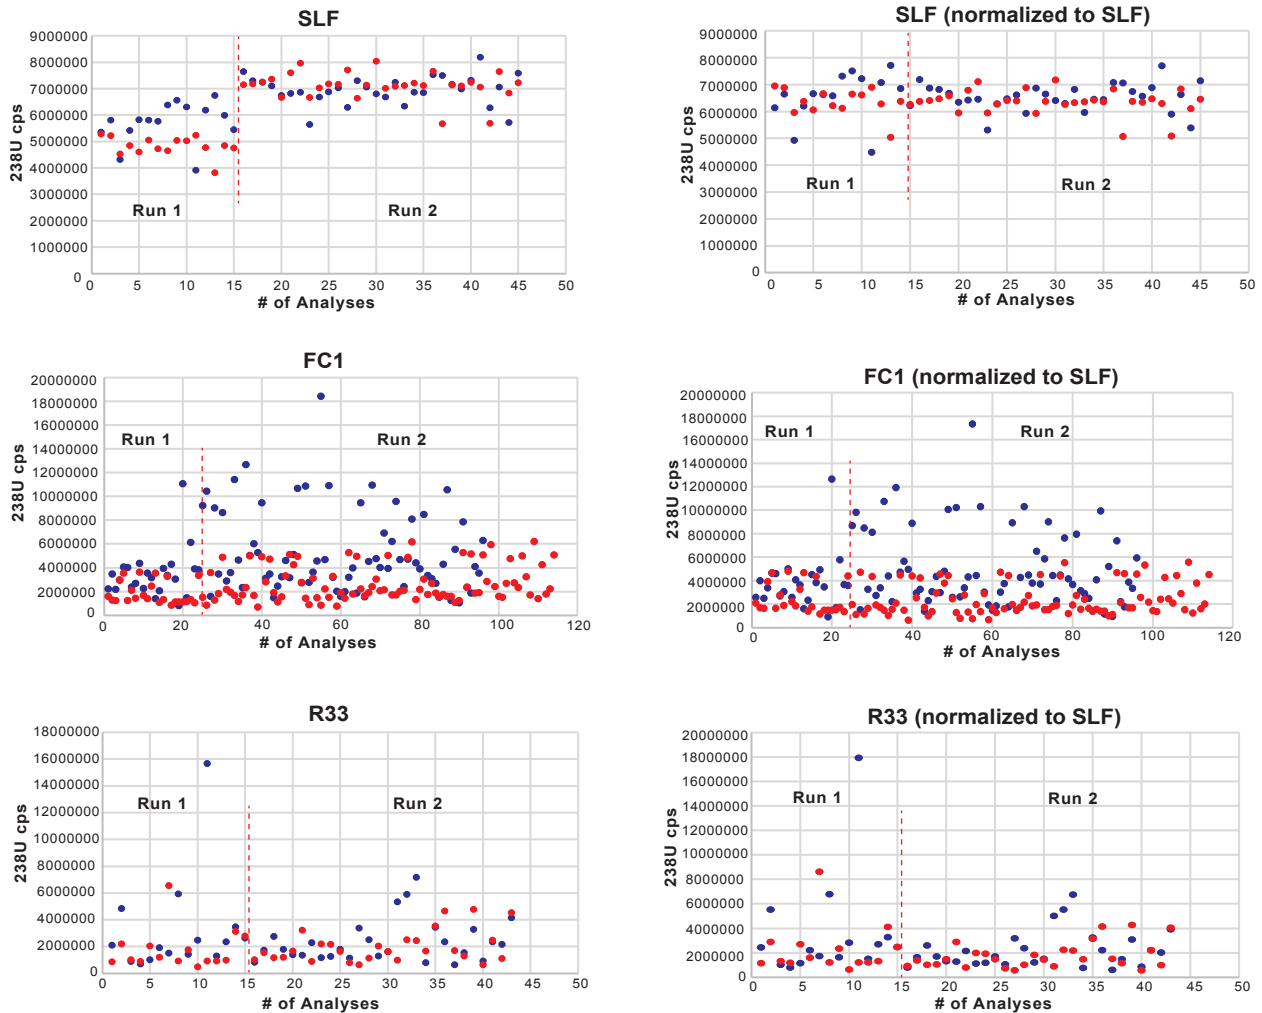

**Average of all 238U cps SLF no CA runs 1-2: 6544543**  
 Average SLF Run 1: 5721234 (fractionation factor: 0.874)  
 Average SLF Run 2: 6956197 (fractionation factor: 1.063)

**Average of all 238U cps SLF CA runs 1-2: 6355556**  
 Average SLF CA Run 1: 4826593 (fractionation factor: 0.759)  
 Average SLF CA Run 2: 7120037 (fractionation factor: 1.120)

**Figure S15.** Scatter plots showing primary reference materials (FC1, SLF, R33) versus uranium ( $^{238}\text{U}$  cps). Plots show both raw data (left column) and the same data normalized to SLF. We found that primary SLF had homogeneous  $^{238}\text{U}$  cps within individual sessions of both treated and untreated runs. We normalize the  $^{238}\text{U}$  cps for all other grains and reference materials in each session to the average  $^{238}\text{U}$  cps of SLF across for treated and untreated aliquots, respectively.

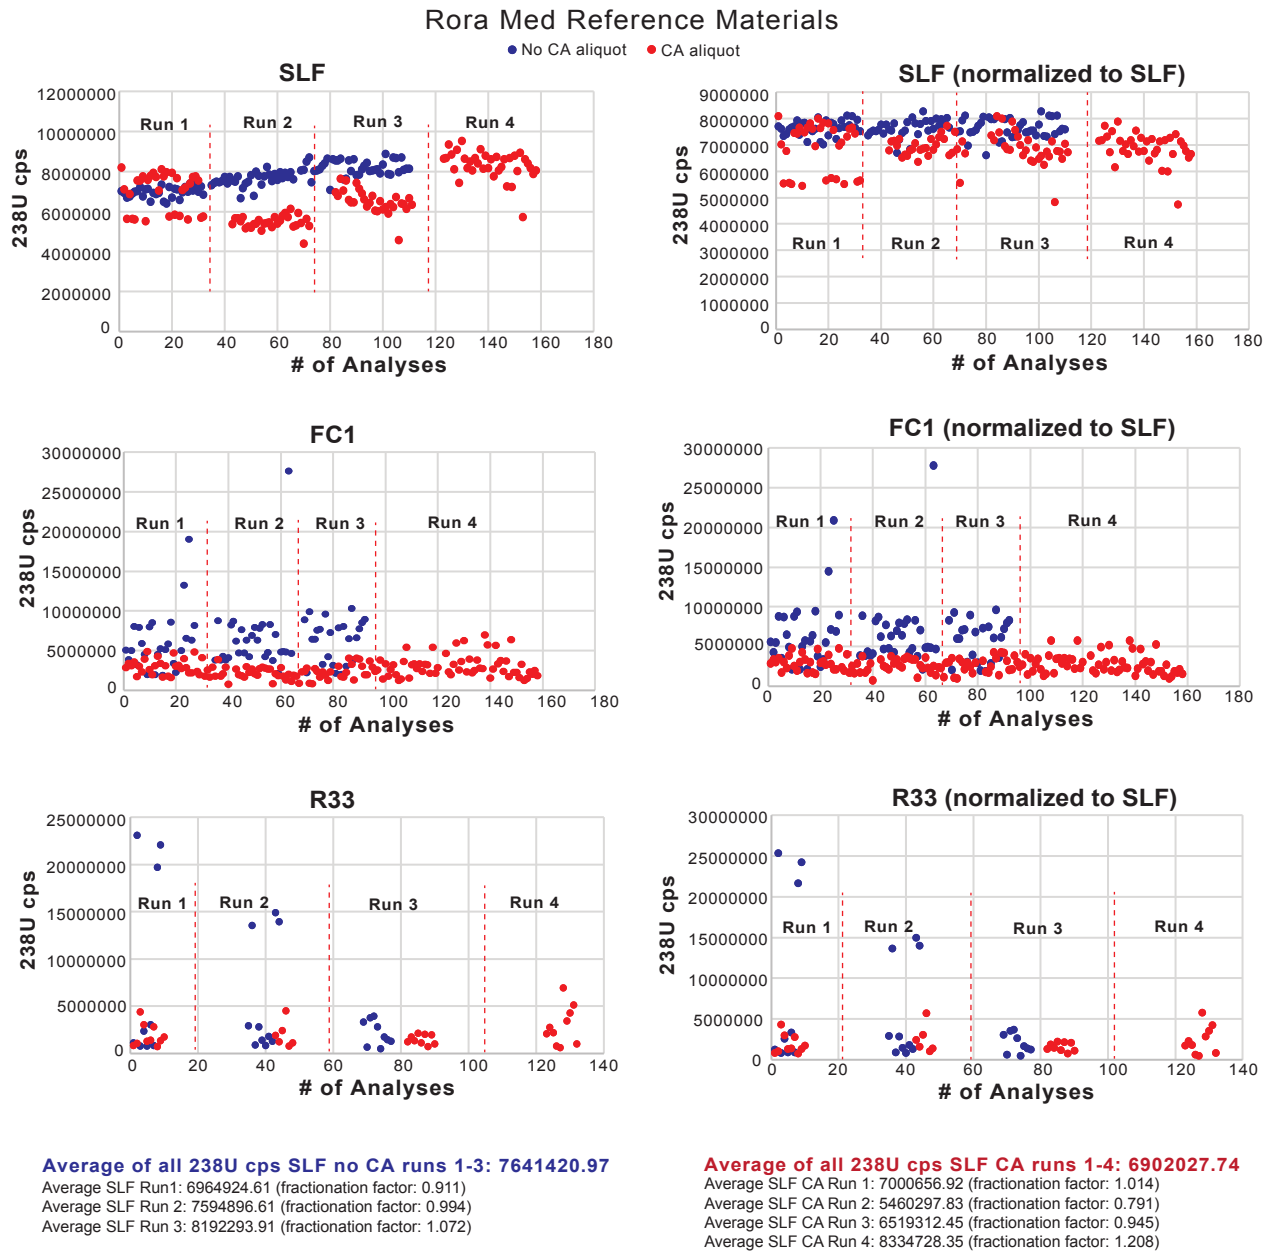

**Figure S16.** Scatter plots showing reference materials versus uranium ( $^{238}\text{U}$  cps) analyzed during detrital zircon sample Rora Med analyses. Plots show both raw data (left column) and the same data normalized to SLF (right). We found that primary SLF had homogeneous  $^{238}\text{U}$  cps within individual sessions of both treated and untreated runs. We normalize the  $^{238}\text{U}$  cps for all unknown Rora Med grains and reference materials in each session to the average  $^{238}\text{U}$  cps of SLF across for treated and untreated aliquots, respectively.

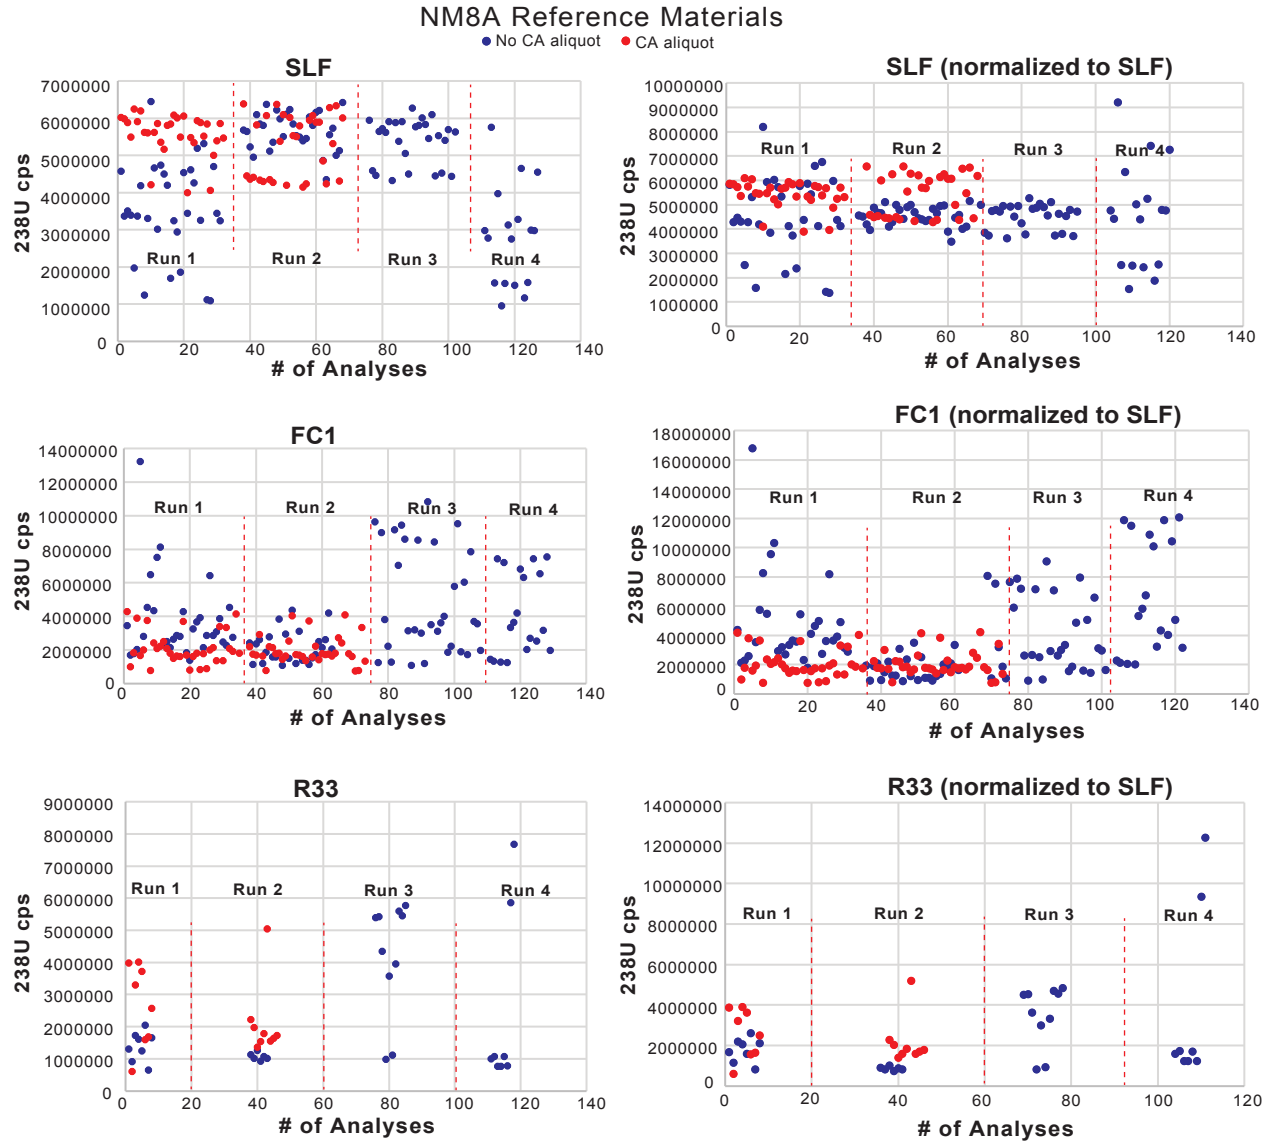

**Average of all 238U cps SLF no CA runs 1-4: 4524160.91**

Average SLF Run1: 3561630.15 (fractionation factor: 0.788)  
 Average SLF Run 2: 5649853.09 (fractionation factor: 1.249)  
 Average SLF Run 3: 5402447.47 (fractionation factor: 1.194)  
 Average SLF Run 4: 2831705.55 (fractionation factor: 0.626)

**Average of all 238U cps SLF CA runs 1-2: 5419888**

Average SLF CA Run 1: 5570640.05 (fractionation factor: 1.028)  
 Average SLF CA Run 2: 5264273.73 (fractionation factor: 0.971)

**Figure S17.** Scatter plots showing reference materials versus uranium ( $^{238}\text{U}$  cps) analyzed during detrital zircon sample NM8A analyses. Plots show both raw data (left column) and the same data normalized to SLF (right). We found that primary SLF had homogeneous  $^{238}\text{U}$  cps within individual sessions of both treated and untreated runs. We normalize the  $^{238}\text{U}$  cps for all unknown NM8A grains and reference materials in each session to the average  $^{238}\text{U}$  cps of SLF across for treated and untreated aliquots, respectively.

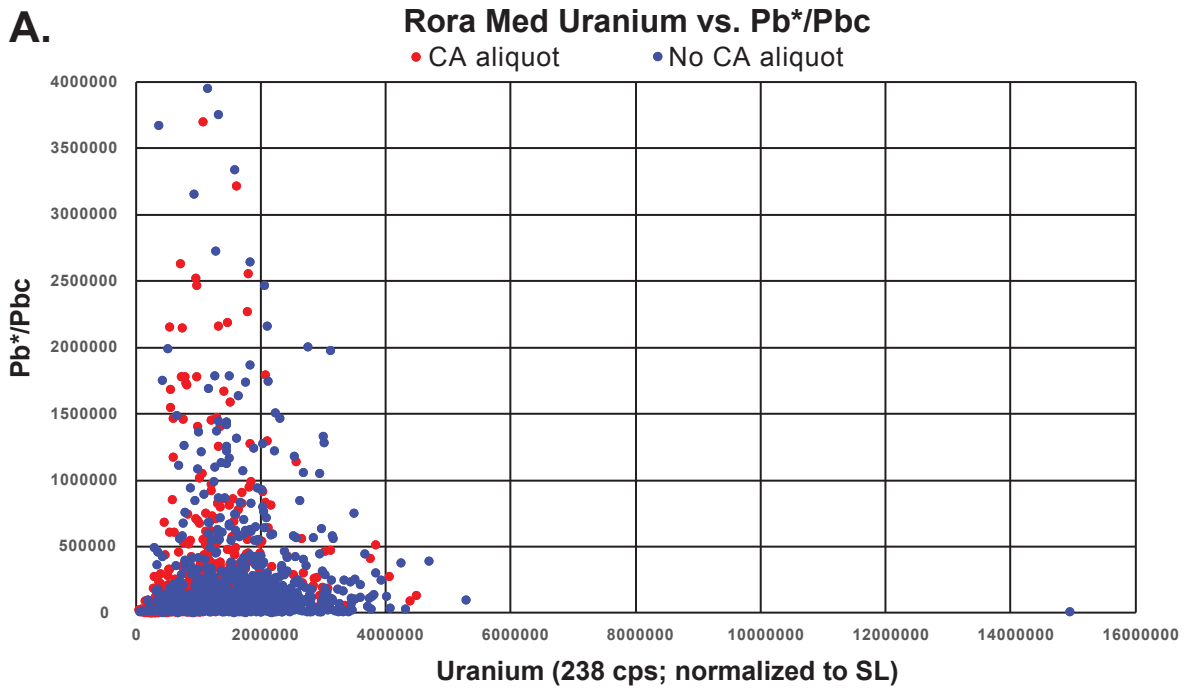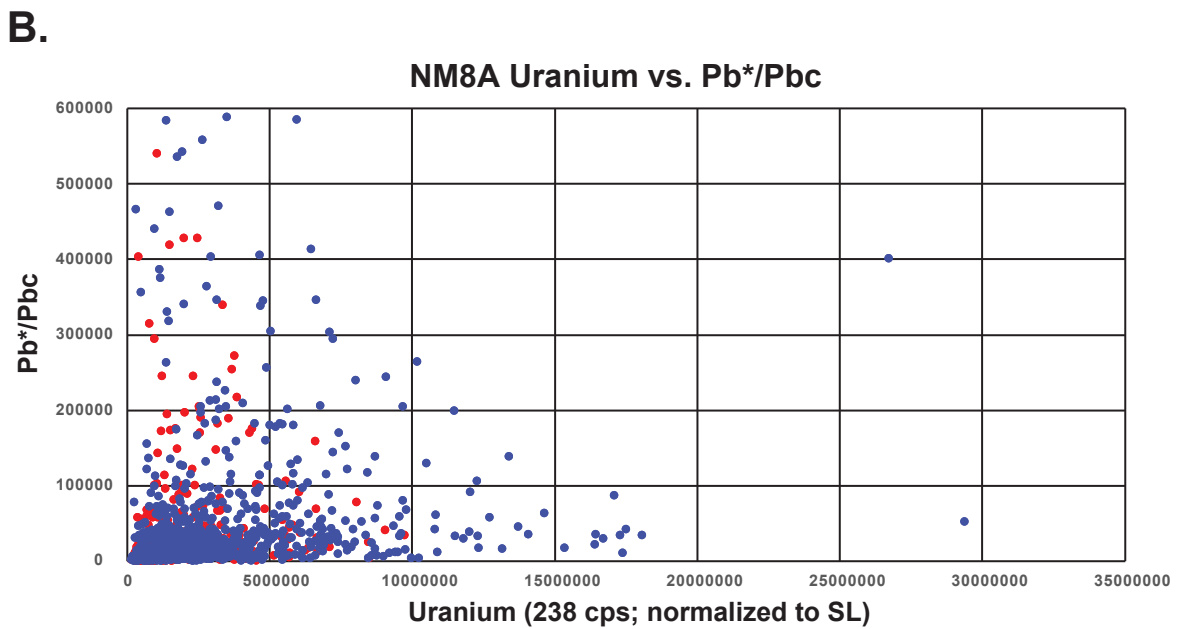

**Figure S18.** Pb\*/Pbc ratios plotted against Uranium (238 cps) for **A.** Rora Med and **B.** NM8A. The Pb\*/Pbc ratios in the treated aliquot of Rora Med and NM8A are marginally higher than the untreated aliquot for similar concentrations of uranium, but are overall similar.

### **Zircon Optical Profilometry**

Optical profilometry data was collected to determine how pit depths differed from treated and untreated aliquots to determine if CA has an effect of laser coupling and laser ablation rates. Table S14 shows pit depth data collected for treated and untreated aliquots of reference materials (FC1, SLF, R33). Table S15 shows pit depths for treated and untreated aliquots of MIGU-02. Depth maps, 3-D images, and crosscut profiles for all analyses are available upon request.



Table S14. Measured pit depths for treated and untreated aliquots of primary reference materials

| <b>Primary Reference Materials</b> |               |              |               |                  |                 |                  |
|------------------------------------|---------------|--------------|---------------|------------------|-----------------|------------------|
| <b>Time</b>                        | <b>FC1 CA</b> | <b>SL CA</b> | <b>R33 CA</b> | <b>FC1 no CA</b> | <b>SL no CA</b> | <b>R33 no CA</b> |
| <i>pit depths (um)</i>             |               |              |               |                  |                 |                  |
| <b>3 secs</b>                      | 1.8           | 1.9          | 2             | 1.7              | 1.9             | 2.1              |
| <b>6 secs</b>                      | 2.9           | 3.3          | 3             | 2.8              | 3.4             | 3.3              |
| <b>9 secs</b>                      | 4             | 4.2          | 4             | 4.5              | 4.7             | 4.4              |
| <b>12 secs</b>                     | 5.5           | 5.1          | 5.3           | 6                | 5.6             | 5.5              |
| <b>15 secs</b>                     | 6.7           | 6.5          | 6.7           | 7.4              | 7               | 7                |
| <b>18 secs</b>                     | 8.2           | 7.6          | 8             | 9                | 8.1             | 8.2              |
| <b>21 secs</b>                     | 9.3           | 9            | 9.2           | 10.5             | 9.7             | 9.8              |
| <b>24 secs</b>                     | 10.4          | 10           | 11            | 12               | 11              | 11.2             |
| <b>27 secs</b>                     | 12            | 11.2         | 12.5          | 13.2             | 12.3            | 12.7             |
| <b>30 secs</b>                     | 13.5          | 13           | 13.7          | 14.5             | 13.8            | 14               |
| <i>Ablation Rates</i>              | <i>0.45</i>   | <i>0.43</i>  | <i>0.46</i>   | <i>0.48</i>      | <i>0.46</i>     | <i>0.47</i>      |
| <i>um/secs</i>                     |               |              |               |                  |                 |                  |

**Table S15.** Measured pit depths from treated and untreated aliquots of MIGU-02  
***MIGU-02 no CA***

|         | <i>pit depths (<math>\mu\text{m}</math>)</i> |
|---------|----------------------------------------------|
| spot 1  | 10                                           |
| spot 2  | 12                                           |
| spot 3  | 9.2                                          |
| spot 10 | 9.5                                          |
| spot 33 | 11                                           |

***MIGU-02 CA***

|         | <i>pit depths (<math>\mu\text{m}</math>)</i> |
|---------|----------------------------------------------|
| spot 13 | 8                                            |
| spot 2  | 8                                            |
| spot 4  | 8.3                                          |

## **MIGU-02 U-Pb zircon geochronology data (CA-ID-TIMS and CA-LA-ICP-MS)**

This section includes raw data for concordant and discordant U-Pb zircon geochronology for igneous sample MIGU-02. Table S16 contains all LA-ICP-MS and CA-LA-ICP-MS data and Table S17 contains all CA-ID-TIMS data.

**TABLE S16: MIGU-02 LA-ICPMS U-Pb ZIRCON GEOCHRONOLOGY**

| Zircon<br>#                               | Composition    |                 |       |                 |           |                |           |                |           |                | Ages           |            |                |            |                 |            | %<br>Disc. |
|-------------------------------------------|----------------|-----------------|-------|-----------------|-----------|----------------|-----------|----------------|-----------|----------------|----------------|------------|----------------|------------|-----------------|------------|------------|
|                                           | U<br>(238 cps) | 206Pb/<br>204Pb | U/Th  | 206Pb/<br>207Pb | 1σ<br>(%) | 207Pb/<br>235U | 1σ<br>(%) | 206Pb/<br>238U | 1σ<br>(%) | error<br>corr. | 206Pb/<br>238U | 1σ<br>(Ma) | 207Pb/<br>235U | 1σ<br>(Ma) | 206Pb/<br>207Pb | 1σ<br>(Ma) |            |
| <i>MIGU-02 (no CA)</i>                    |                |                 |       |                 |           |                |           |                |           |                |                |            |                |            |                 |            |            |
| 1                                         | 69345121       | 1094            | 2.629 | 11.7341         | 1.87      | 2.3017         | 1.99      | 0.19597        | 0.67      | 0.338          | 1153.62        | 7.1        | 1212.81        | 14.1       | 1319.72         | 36.3       | 12.6       |
| 31                                        | 37007127       | 1309            | 2.575 | 10.5165         | 0.74      | 3.0369         | 2.37      | 0.23174        | 2.26      | 0.951          | 1343.59        | 27.4       | 1416.95        | 18.1       | 1528.99         | 13.8       | 12.1       |
| 34                                        | 24883550       | 4583            | 2.535 | 11.5954         | 0.54      | 2.2007         | 2.63      | 0.18515        | 2.58      | 0.979          | 1095.08        | 25.9       | 1181.27        | 18.4       | 1342.74         | 10.3       | 18.4       |
| 35                                        | 20882124       | 22136           | 4.478 | 12.2946         | 0.64      | 2.3127         | 1.46      | 0.20631        | 1.31      | 0.899          | 1209.14        | 14.5       | 1216.19        | 10.4       | 1228.74         | 12.5       | 1.6        |
| <i>MIGU-02 (no CA; discordant)</i>        |                |                 |       |                 |           |                |           |                |           |                |                |            |                |            |                 |            |            |
| 2                                         | 5435824        | 22935           | 0.070 | 17.3008         | 1.74      | 1.8437         | 2.19      | 0.23145        | 1.32      | 0.605          | 1342.09        | 16.0       | 1061.20        | 14.4       | 521.24          | 38.2       | -157.5     |
| 3                                         | 50683043       | 58723           | 1.643 | 13.4834         | 0.81      | 2.4249         | 1.14      | 0.23723        | 0.81      | 0.707          | 1372.29        | 10.0       | 1250.00        | 8.2        | 1045.11         | 16.3       | -31.3      |
| 4                                         | 21491403       | 5660            | 3.817 | 12.2240         | 0.41      | 3.4997         | 0.86      | 0.31041        | 0.76      | 0.880          | 1742.72        | 11.6       | 1527.15        | 6.8        | 1240.03         | 8.0        | -40.5      |
| 5                                         | 2023758        | 282             | 1.750 | 4.1808          | 0.42      | 17.6820        | 0.80      | 0.53639        | 0.69      | 0.852          | 2768.34        | 15.4       | 2972.60        | 7.7        | 3113.86         | 6.7        | 11.1       |
| 6                                         | 18865191       | 1680            | 1.851 | 8.3907          | 3.81      | 2.8259         | 4.21      | 0.17205        | 1.80      | 0.426          | 1023.37        | 17.0       | 1362.44        | 31.6       | 1943.16         | 68.2       | 47.3       |
| 7                                         | 179954         | 145             | 5.997 | 2.2799          | 6.42      | 30.0156        | 30.68     | 0.49654        | 30.00     | 0.978          | 2598.92        | 643.9      | 3487.32        | 310.9      | 4046.37         | 95.9       | 35.8       |
| 9                                         | 68459621       | 34309           | 2.715 | 14.2840         | 0.65      | 2.3215         | 0.96      | 0.24061        | 0.71      | 0.740          | 1389.86        | 8.9        | 1218.89        | 6.8        | 927.70          | 13.3       | -49.8      |
| 13                                        | 53536685       | 5958            | 2.550 | 12.9919         | 0.67      | 2.4782         | 1.22      | 0.23361        | 1.03      | 0.840          | 1353.40        | 12.6       | 1265.68        | 8.9        | 1119.56         | 13.3       | -20.9      |
| 16                                        | 12881911       | 28355           | 1.929 | 11.8550         | 1.23      | 2.8761         | 1.98      | 0.24739        | 1.55      | 0.784          | 1425.01        | 19.9       | 1375.66        | 14.9       | 1299.84         | 23.9       | -9.6       |
| 17                                        | 20475955       | 32116           | 2.183 | 12.1590         | 0.62      | 2.6553         | 1.14      | 0.23426        | 0.96      | 0.839          | 1356.77        | 11.7       | 1316.11        | 8.4        | 1250.45         | 12.2       | -8.5       |
| 21                                        | 2522601        | 2002            | 2.725 | 8.4673          | 2.83      | 4.0953         | 3.47      | 0.25161        | 2.00      | 0.578          | 1446.76        | 25.9       | 1653.38        | 28.3       | 1926.90         | 50.7       | 24.9       |
| 22                                        | 21330356       | 507             | 4.090 | 8.0805          | 3.48      | 6.6782         | 3.81      | 0.39155        | 1.57      | 0.411          | 2129.99        | 28.5       | 2069.74        | 33.7       | 2010.27         | 61.7       | -6.0       |
| 27                                        | 58829527       | 45082           | 2.647 | 13.8392         | 0.38      | 2.4755         | 0.69      | 0.24858        | 0.58      | 0.832          | 1431.13        | 7.4        | 1264.89        | 5.0        | 992.36          | 7.8        | -44.2      |
| 30                                        | 45191687       | 12827           | 1.085 | 14.9929         | 2.30      | 2.0891         | 30.09     | 0.22726        | 30.00     | 0.997          | 1320.14        | 358.5      | 1145.22        | 209.5      | 827.46          | 48.0       | -59.5      |
| 32                                        | 14436036       | 48293           | 3.510 | 11.9403         | 0.54      | 2.7520         | 1.54      | 0.23842        | 1.44      | 0.936          | 1378.48        | 17.9       | 1342.62        | 11.5       | 1285.89         | 10.5       | -7.2       |
| 33                                        | 53389376       | 3922            | 2.048 | 12.5164         | 0.43      | 2.4919         | 1.28      | 0.22630        | 1.20      | 0.941          | 1315.10        | 14.3       | 1269.67        | 9.2        | 1193.52         | 8.5        | -10.2      |
| <i>MIGU-02 (no CA; partial epoxy hit)</i> |                |                 |       |                 |           |                |           |                |           |                |                |            |                |            |                 |            |            |
| 8                                         | 1              | 1000            | 0.721 | 5.0803          | 1.00015   | 36.7765        | 1.17      | 1.35566        | 0.60      | 0.514          | 5523.41        | 22.3       | 3687.55        | 11.5       | 2799.43         | 16.4       | -97.3      |
| 14                                        | 1              | 1000            | 0.000 | 5.0819          | 1.00015   | 36.0276        | 1.17      | 1.32846        | 0.60      | 0.514          | 5448.57        | 22.1       | 3667.22        | 11.5       | 2798.92         | 16.4       | -94.7      |
| 15                                        | 1              | 1000            | 0.000 | 5.0819          | 1.00015   | 35.6852        | 1.17      | 1.31584        | 0.60      | 0.514          | 5413.52        | 22.0       | 3657.79        | 11.5       | 2798.92         | 16.4       | -93.4      |
| 18                                        | 1              | 1000            | 0.000 | 5.0836          | 1.00015   | 31.2287        | 1.17      | 1.15189        | 0.60      | 0.514          | 4940.20        | 20.7       | 3526.28        | 11.5       | 2798.38         | 16.4       | -76.5      |
| 19                                        | 1              | 1000            | 0.721 | 5.0817          | 1.00015   | 36.8174        | 1.17      | 1.35753        | 0.60      | 0.514          | 5528.53        | 22.3       | 3688.65        | 11.5       | 2798.99         | 16.4       | -97.5      |
| 20                                        | 1              | 1000            | 0.143 | 5.0817          | 1.00015   | 36.8163        | 1.17      | 1.35748        | 0.60      | 0.514          | 5528.41        | 22.3       | 3688.62        | 11.5       | 2798.99         | 16.4       | -97.5      |
| 23                                        | 1              | 1000            | 0.299 | 5.0843          | 1.00015   | 36.8206        | 1.17      | 1.35835        | 0.60      | 0.514          | 5530.78        | 22.3       | 3688.74        | 11.5       | 2798.14         | 16.4       | -97.7      |
| 24                                        | 1              | 1000            | 0.911 | 5.0828          | 1.00015   | 36.8207        | 1.17      | 1.35794        | 0.60      | 0.514          | 5529.65        | 22.3       | 3688.74        | 11.5       | 2798.65         | 16.4       | -97.6      |
| 25                                        | 1              | 1000            | 2.079 | 5.0828          | 1.00015   | 36.8209        | 1.17      | 1.35794        | 0.60      | 0.514          | 5529.66        | 22.3       | 3688.75        | 11.5       | 2798.65         | 16.4       | -97.6      |
| 26                                        | 1              | 1000            | 0.721 | 5.0847          | 1.00015   | 36.8166        | 1.17      | 1.35829        | 0.60      | 0.514          | 5530.62        | 22.3       | 3688.63        | 11.5       | 2798.04         | 16.4       | -97.7      |
| 28                                        | 1              | 1000            | 0.721 | 5.0864          | 1.00015   | 36.8088        | 1.17      | 1.35846        | 0.60      | 0.514          | 5531.09        | 22.3       | 3688.42        | 11.5       | 2797.48         | 16.4       | -97.7      |
| 29                                        | 1              | 1000            | 0.721 | 5.0865          | 1.00015   | 36.8296        | 1.17      | 1.35926        | 0.60      | 0.514          | 5533.27        | 22.3       | 3688.98        | 11.5       | 2797.44         | 16.4       | -97.8      |

| Zircon<br># | Composition    |                 |      |                 |           |                |           |                |           |                | Ages           |            |                |            |                 |            | %<br>Disc. |
|-------------|----------------|-----------------|------|-----------------|-----------|----------------|-----------|----------------|-----------|----------------|----------------|------------|----------------|------------|-----------------|------------|------------|
|             | U<br>(238 cps) | 206Pb/<br>204Pb | U/Th | 206Pb/<br>207Pb | 1σ<br>(%) | 207Pb/<br>235U | 1σ<br>(%) | 206Pb/<br>238U | 1σ<br>(%) | error<br>corr. | 206Pb/<br>238U | 1σ<br>(Ma) | 207Pb/<br>235U | 1σ<br>(Ma) | 206Pb/<br>207Pb | 1σ<br>(Ma) |            |



**TABLE S17: MIGU-02 CA-ID-TIMS U-Pb ZIRCON GEOCHRONOLOGY**

| Zircon          | <u>Dates (Ma)</u> |            |                |            | <u>Composition</u> |            |            |                |          |             |            | <u>Isotopic Ratios</u> |                 |                |           |                |           |                 |           |
|-----------------|-------------------|------------|----------------|------------|--------------------|------------|------------|----------------|----------|-------------|------------|------------------------|-----------------|----------------|-----------|----------------|-----------|-----------------|-----------|
|                 | 206Pb/<br>238U    | 2σ<br>(Ma) | 207Pb/<br>235U | 2σ<br>(Ma) | 206Pb/<br>207Pb    | 2σ<br>(Ma) | %<br>Disc. | Coef.<br>Corr. | U<br>Th/ | Pbc<br>(pg) | Pb'<br>Pbc | 206Pb/<br>204Pb        | 208Pb/<br>206Pb | 206Pb/<br>238U | 2σ<br>(%) | 207Pb/<br>235U | 2σ<br>(%) | 207Pb/<br>206Pb | 2σ<br>(%) |
| <b>MIGU z02</b> | 1394.7            | 1.1        | 1394.4         | 1.1        | 1394.1             | 1.8        | 0.807      | -0.04          | 0.79     | 0.54        | 181        | 18408                  | 0.235           | 0.24153        | 0.084     | 2.9484         | 0.15      | 0.08857         | 0.087     |
| <b>MIGU z03</b> | 1390.1            | 1.1        | 1391.9         | 1.4        | 1394.6             | 2.6        | 0.714      | 0.32           | 0.46     | 0.48        | 59         | 7372                   | 0.136           | 0.24066        | 0.085     | 2.9386         | 0.18      | 0.0886          | 0.13      |
| <b>MIGU z04</b> | 1391.9            | 1.4        | 1392.6         | 2.3        | 1393.9             | 4.8        | 0.602      | 0.14           | 0.45     | 0.45        | 25.4       | 3386                   | 0.134           | 0.24099        | 0.11      | 2.9414         | 0.3       | 0.08856         | 0.25      |
| <b>MIGU z05</b> | 1390.9            | 0.9        | 1392.2         | 1.2        | 1394.2             | 1.9        | 0.873      | 0.23           | 0.47     | 0.38        | 114        | 17951                  | 0.139           | 0.24082        | 0.072     | 2.9398         | 0.15      | 0.08858         | 0.092     |
| <b>MIGU z06</b> | 1396              | 3.1        | 1398.3         | 5.6        | 1402               | 12         | 0.573      | 0.42           | 0.49     | 0.61        | 14         | 1387                   | 0.147           | 0.24179        | 0.25      | 2.964          | 0.74      | 0.08893         | 0.63      |
| <b>MIGU z07</b> | 1400              | 6.2        | 1397.6         | 4.6        | 1393.9             | 6          | 0.855      | -0.44          | 0.53     | 0.09        | 4.26       | 2721                   | 0.157           | 0.2426         | 0.5       | 2.961          | 0.61      | 0.08857         | 0.31      |

### **Detrital zircon U-Pb zircon geochronology data (CA-ID-TIMS and CA-LA-ICP-MS)**

This section includes raw data for concordant and discordant U-Pb zircon geochronology for detrital zircon samples NM8A and Rora Med. Tables S18-S19 contain all LA-ICP-MS and CA-LA-ICP-MS data for Rora Med and Tables S20-S21 contain all LA-ICP-MS and CA-ID-TIMS data for NM8A.

Quantitative comparisons of detrital zircon data were completed using Saylor and Sundell (2016) DZStats program. Table S22 contains all quantitative statistical calculations from DZStats.

Table S23 contains tuning parameters for the laser and mass spectrometer at the University of Arizona's LaserChron Center.

**TABLE S18: RORA MED (no CA) LA-ICPMS U-Pb ZIRCON GEOCHRONOLOGY**

| Zircon #     | Composition |                    |             |      |             |                |            |                |            |                | Ages        |                 |                 |                 |                 |                  |                 |         |
|--------------|-------------|--------------------|-------------|------|-------------|----------------|------------|----------------|------------|----------------|-------------|-----------------|-----------------|-----------------|-----------------|------------------|-----------------|---------|
|              | U (238 cps) | U (norm) (238 cps) | 206Pb/204Pb | U/Th | 206Pb/207Pb | 1 $\sigma$ (%) | 207Pb/235U | 1 $\sigma$ (%) | 206Pb/238U | 1 $\sigma$ (%) | Error Corr. | 206Pb/238U (Ma) | 1 $\sigma$ (Ma) | 207Pb/235U (Ma) | 1 $\sigma$ (Ma) | 206Pb/207Pb (Ma) | 1 $\sigma$ (Ma) | % Disc. |
| <b>Run 1</b> |             |                    |             |      |             |                |            |                |            |                |             |                 |                 |                 |                 |                  |                 |         |
| Spot 1       | 1218898     | 1337288            | 557130.4    | 2.7  | 5.4         | 0.6            | 13.0       | 0.9            | 0.5        | 0.6            | 0.73533     | 2684.0          | 14.0            | 2676.1          | 8.2             | 2670.1           | 9.7             | -0.5    |
| Spot 2       | 1633945     | 1792648            | 55112.8     | 2.1  | 7.2         | 0.8            | 8.0        | 1.2            | 0.4        | 0.9            | 0.76018     | 2269.3          | 16.8            | 2233.7          | 10.5            | 2201.3           | 13.1            | -3.1    |
| Spot 3       | 1867986     | 2049421            | 63918.7     | 4.8  | 7.7         | 0.6            | 6.7        | 1.1            | 0.4        | 1.0            | 0.83493     | 2076.4          | 17.0            | 2075.5          | 10.1            | 2074.4           | 11.1            | -0.1    |
| Spot 4       | 695211      | 762736             | 212666.7    | 2.8  | 6.8         | 0.9            | 8.7        | 1.2            | 0.4        | 0.8            | 0.69403     | 2326.0          | 16.3            | 2309.8          | 11.0            | 2295.5           | 14.9            | -1.3    |
| Spot 5       | 1333963     | 1463530            | 301097.5    | 1.2  | 4.5         | 0.6            | 18.2       | 1.2            | 0.6        | 1.0            | 0.84839     | 3023.7          | 24.9            | 3002.5          | 11.7            | 2988.3           | 10.4            | -1.2    |
| Spot 6       | 1854654     | 2034794            | 94037.6     | 2.3  | 8.5         | 0.8            | 5.5        | 1.6            | 0.3        | 1.4            | 0.86922     | 1919.1          | 23.4            | 1905.2          | 14.0            | 1890.1           | 14.4            | -1.5    |
| Spot 7       | 1456501     | 1597969            | 111580.5    | 1.2  | 7.7         | 0.5            | 6.9        | 0.8            | 0.4        | 0.6            | 0.81443     | 2123.8          | 11.7            | 2103.9          | 7.1             | 2084.4           | 8.1             | -1.9    |
| Spot 8       | 1142909     | 1253919            | 993476.9    | 1.7  | 5.8         | 0.7            | 11.6       | 1.2            | 0.5        | 0.9            | 0.80819     | 2571.7          | 20.1            | 2571.2          | 11.0            | 2570.7           | 11.5            | 0.0     |
| Spot 9       | 1584007     | 1737860            | 44164.6     | 2.6  | 5.4         | 0.5            | 13.1       | 1.0            | 0.5        | 0.8            | 0.84611     | 2688.0          | 18.6            | 2686.3          | 9.4             | 2685.0           | 8.8             | -0.1    |
| Spot 10      | 1603679     | 1759442            | 4890.5      | 2.5  | 6.6         | 1.8            | 7.3        | 2.0            | 0.4        | 0.9            | 0.42442     | 1992.0          | 14.6            | 2152.3          | 17.9            | 2308.9           | 31.2            | 13.7    |
| Spot 12      | 1554689     | 1705695            | 109507.3    | 9.8  | 7.6         | 0.7            | 7.0        | 1.2            | 0.4        | 1.0            | 0.82965     | 2129.7          | 18.1            | 2113.1          | 10.7            | 2096.9           | 11.8            | -1.6    |
| Spot 13      | 417860      | 458447             | 108530.3    | 1.8  | 8.2         | 0.7            | 6.1        | 1.4            | 0.4        | 1.2            | 0.88025     | 2003.1          | 20.9            | 1986.4          | 12.0            | 1969.1           | 11.7            | -1.7    |
| Spot 14      | 954706      | 1047435            | 171255.3    | 2.7  | 5.4         | 0.6            | 13.3       | 1.1            | 0.5        | 0.9            | 0.80499     | 2725.6          | 19.5            | 2700.3          | 10.3            | 2681.4           | 10.7            | -1.6    |
| Spot 15      | 569973      | 625334             | 16995.1     | 2.1  | 5.0         | 0.7            | 14.5       | 1.1            | 0.5        | 0.8            | 0.72660     | 2755.9          | 17.2            | 2784.1          | 10.0            | 2804.6           | 11.9            | 1.7     |
| Spot 16      | 1194973     | 1311039            | 131048.5    | 1.6  | 8.4         | 0.7            | 5.5        | 1.1            | 0.3        | 0.8            | 0.77097     | 1881.1          | 13.6            | 1901.7          | 9.3             | 1924.3           | 12.3            | 2.2     |
| Spot 17      | 1686276     | 1850063            | 117008.2    | 2.3  | 5.5         | 0.5            | 13.1       | 1.0            | 0.5        | 0.9            | 0.88083     | 2718.1          | 20.3            | 2687.2          | 9.8             | 2664.1           | 8.1             | -2.0    |
| Spot 18      | 800419      | 878163             | 11798.0     | 1.7  | 6.2         | 1.4            | 9.0        | 1.9            | 0.4        | 1.2            | 0.65993     | 2227.6          | 23.2            | 2336.0          | 17.1            | 2432.1           | 23.8            | 8.4     |
| Spot 19      | 2061820     | 2262083            | 101482.7    | 2.6  | 5.4         | 0.6            | 13.1       | 1.2            | 0.5        | 1.1            | 0.85759     | 2698.2          | 23.4            | 2688.9          | 11.7            | 2681.8           | 10.5            | -0.6    |
| Spot 21      | 1831065     | 2008915            | 11946.7     | 1.2  | 5.9         | 0.4            | 10.6       | 0.8            | 0.5        | 0.7            | 0.85343     | 2456.5          | 14.2            | 2492.5          | 7.6             | 2521.9           | 7.1             | 2.6     |
| Spot 22      | 1829444     | 2007136            | 359902.8    | 1.5  | 4.2         | 0.7            | 19.8       | 1.2            | 0.6        | 0.9            | 0.81080     | 3036.0          | 22.6            | 3079.2          | 11.1            | 3107.5           | 10.7            | 2.3     |
| Spot 23      | 1662187     | 1823634            | 115853.2    | 4.8  | 7.7         | 0.8            | 6.8        | 1.2            | 0.4        | 0.9            | 0.74678     | 2110.7          | 15.7            | 2091.4          | 10.4            | 2072.4           | 13.7            | -1.8    |
| Spot 24      | 1520431     | 1668109            | 47904.1     | 1.0  | 8.5         | 0.5            | 5.7        | 0.8            | 0.4        | 0.7            | 0.80554     | 1963.2          | 11.3            | 1936.1          | 7.1             | 1907.1           | 8.8             | -2.9    |
| Spot 25      | 1200356     | 1316946            | 572828.8    | 1.8  | 7.5         | 0.7            | 7.0        | 1.2            | 0.4        | 1.0            | 0.82156     | 2105.5          | 17.8            | 2109.3          | 10.7            | 2113.0           | 12.0            | 0.4     |
| Spot 26      | 1805895     | 1981300            | 11677.7     | 1.6  | 6.4         | 2.1            | 9.0        | 2.3            | 0.4        | 1.0            | 0.43934     | 2282.8          | 19.5            | 2341.7          | 21.1            | 2393.4           | 35.3            | 4.6     |
| Spot 27      | 1122810     | 1231868            | 104061.7    | 4.9  | 5.0         | 0.7            | 15.3       | 1.2            | 0.6        | 1.0            | 0.83524     | 2865.7          | 23.1            | 2831.9          | 11.4            | 2808.0           | 10.7            | -2.1    |
| Spot 28      | 2053065     | 2252477            | 268683.8    | 2.3  | 8.5         | 0.5            | 5.5        | 1.0            | 0.3        | 0.8            | 0.85605     | 1904.9          | 13.6            | 1897.6          | 8.3             | 1889.6           | 8.9             | -0.8    |
| Spot 29      | 818981      | 898528             | 77117.8     | 2.4  | 6.3         | 0.7            | 10.1       | 1.1            | 0.5        | 0.8            | 0.73857     | 2467.8          | 16.8            | 2446.4          | 10.2            | 2428.7           | 12.6            | -1.6    |
| Spot 30      | 1361784     | 1494053            | 42400.4     | 2.0  | 5.2         | 0.6            | 14.3       | 1.0            | 0.5        | 0.9            | 0.83127     | 2806.0          | 19.6            | 2769.1          | 9.8             | 2742.3           | 9.4             | -2.3    |
| Spot 31      | 1406636     | 1543261            | 96960.7     | 2.1  | 8.5         | 0.7            | 5.5        | 1.1            | 0.3        | 0.8            | 0.77060     | 1905.2          | 13.7            | 1901.2          | 9.3             | 1896.9           | 12.3            | -0.4    |
| Spot 32      | 1280019     | 1404346            | 63409.3     | 1.7  | 7.4         | 0.6            | 7.2        | 1.1            | 0.4        | 1.0            | 0.87066     | 2139.0          | 17.7            | 2138.6          | 10.0            | 2138.2           | 9.6             | 0.0     |
| Spot 33      | 1443390     | 1583585            | 95249.2     | 2.3  | 8.5         | 0.7            | 5.5        | 1.1            | 0.3        | 0.9            | 0.81725     | 1916.7          | 15.6            | 1904.2          | 9.9             | 1890.5           | 11.9            | -1.4    |
| Spot 34      | 1519936     | 1667566            | 130576.9    | 1.8  | 8.5         | 0.9            | 5.4        | 1.1            | 0.3        | 0.7            | 0.65319     | 1893.1          | 12.1            | 1891.3          | 9.7             | 1889.3           | 15.4            | -0.2    |
| Spot 35      | 1265314     | 1388213            | 150712.3    | 1.6  | 5.3         | 0.7            | 13.7       | 1.3            | 0.5        | 1.1            | 0.83809     | 2765.3          | 24.5            | 2726.2          | 12.3            | 2697.4           | 11.7            | -2.5    |
| Spot 36      | 1505484     | 1651710            | 115295.5    | 1.5  | 7.5         | 0.6            | 7.3        | 1.3            | 0.4        | 1.2            | 0.88407     | 2171.3          | 21.7            | 2150.6          | 11.9            | 2130.9           | 10.9            | -1.9    |
| Spot 37      | 2115032     | 2320463            | 91268.9     | 2.1  | 7.8         | 0.5            | 6.6        | 1.3            | 0.4        | 1.2            | 0.91230     | 2060.9          | 21.5            | 2057.7          | 11.8            | 2054.5           | 9.7             | -0.3    |
| Spot 38      | 1677781     | 1840742            | 208410.3    | 2.1  | 5.4         | 0.6            | 13.1       | 1.2            | 0.5        | 1.0            | 0.83367     | 2703.9          | 21.2            | 2688.8          | 10.9            | 2677.5           | 10.5            | -1.0    |
| Spot 39      | 1048438     | 1150272            | 67174.3     | 2.8  | 7.6         | 0.7            | 7.2        | 1.1            | 0.4        | 0.9            | 0.77331     | 2162.9          | 16.1            | 2133.8          | 10.1            | 2105.9           | 12.6            | -2.7    |
| Spot 40      | 750584      | 823487             | 123839.6    | 1.6  | 6.9         | 0.8            | 8.3        | 1.4            | 0.4        | 1.1            | 0.83408     | 2268.6          | 22.0            | 2263.9          | 12.5            | 2259.7           | 13.1            | -0.4    |



|         |         |         |           |     |     |     |      |     |     |     |         |        |      |        |      |        |      |      |
|---------|---------|---------|-----------|-----|-----|-----|------|-----|-----|-----|---------|--------|------|--------|------|--------|------|------|
| Spot 42 | 1804316 | 1979567 | 58829.6   | 1.5 | 8.4 | 0.6 | 5.0  | 0.8 | 0.3 | 0.6 | 0.74214 | 1733.4 | 9.6  | 1821.0 | 7.2  | 1922.6 | 10.2 | 9.8  |
| Spot 43 | 1576957 | 1730125 | 124452.3  | 3.2 | 5.4 | 0.6 | 13.0 | 1.1 | 0.5 | 0.8 | 0.79634 | 2681.9 | 18.4 | 2680.9 | 9.9  | 2680.1 | 10.5 | -0.1 |
| Spot 44 | 865992  | 950105  | 844519.9  | 2.7 | 7.1 | 0.7 | 7.9  | 1.1 | 0.4 | 0.9 | 0.81143 | 2215.5 | 17.3 | 2216.6 | 10.3 | 2217.6 | 11.5 | 0.1  |
| Spot 45 | 1589288 | 1743654 | 51912.8   | 3.3 | 7.5 | 0.4 | 6.9  | 0.8 | 0.4 | 0.7 | 0.85035 | 2074.7 | 12.6 | 2100.5 | 7.4  | 2125.9 | 7.7  | 2.4  |
| Spot 46 | 1562030 | 1713748 | 348745.7  | 2.3 | 5.5 | 0.7 | 13.1 | 1.2 | 0.5 | 0.9 | 0.81706 | 2725.3 | 20.9 | 2689.7 | 10.9 | 2663.0 | 11.0 | -2.3 |
| Spot 47 | 855522  | 938618  | 27681.5   | 1.6 | 7.9 | 0.6 | 6.1  | 0.9 | 0.4 | 0.7 | 0.76866 | 1960.1 | 11.7 | 1994.1 | 7.8  | 2029.6 | 10.2 | 3.4  |
| Spot 48 | 1909661 | 2095144 | 53417.8   | 1.9 | 8.4 | 0.7 | 5.5  | 1.2 | 0.3 | 1.0 | 0.81522 | 1887.8 | 15.6 | 1903.5 | 10.0 | 1920.7 | 12.1 | 1.7  |
| Spot 49 | 1808889 | 1984585 | 47930.4   | 2.6 | 5.4 | 0.7 | 12.3 | 1.3 | 0.5 | 1.1 | 0.85347 | 2543.6 | 23.2 | 2625.7 | 12.1 | 2689.6 | 11.1 | 5.4  |
| Spot 50 | 1333963 | 1463530 | 125583.1  | 2.4 | 5.4 | 0.6 | 13.2 | 1.1 | 0.5 | 0.9 | 0.83309 | 2697.7 | 19.7 | 2697.3 | 10.1 | 2697.1 | 9.8  | 0.0  |
| Spot 51 | 1839826 | 2018527 | 96405.1   | 2.1 | 7.5 | 0.7 | 7.4  | 1.1 | 0.4 | 0.9 | 0.78294 | 2192.7 | 16.6 | 2163.0 | 10.2 | 2134.9 | 12.4 | -2.7 |
| Spot 52 | 525644  | 576699  | 113691.8  | 1.7 | 7.3 | 0.8 | 7.4  | 1.2 | 0.4 | 0.9 | 0.76113 | 2163.1 | 17.0 | 2163.7 | 10.9 | 2164.3 | 13.7 | 0.1  |
| Spot 53 | 1797331 | 1971905 | 237615.1  | 2.4 | 5.1 | 0.7 | 14.7 | 1.3 | 0.5 | 1.1 | 0.82796 | 2809.0 | 24.3 | 2798.2 | 12.3 | 2790.4 | 11.8 | -0.7 |
| Spot 54 | 1485069 | 1629313 | 18029.5   | 1.9 | 6.8 | 0.9 | 7.9  | 1.4 | 0.4 | 1.0 | 0.73949 | 2138.8 | 18.7 | 2218.1 | 12.5 | 2292.2 | 16.1 | 6.7  |
| Spot 55 | 394160  | 432445  | 1755688.2 | 1.9 | 7.6 | 0.7 | 7.0  | 1.1 | 0.4 | 0.9 | 0.77502 | 2127.1 | 15.6 | 2113.9 | 9.9  | 2101.2 | 12.3 | -1.2 |
| Spot 56 | 624645  | 685316  | 168149.6  | 2.4 | 5.4 | 0.7 | 12.8 | 1.2 | 0.5 | 1.0 | 0.82273 | 2647.4 | 20.6 | 2667.0 | 10.9 | 2681.9 | 10.9 | 1.3  |
| Spot 57 | 1737137 | 1905863 | 32792.2   | 1.1 | 7.4 | 0.5 | 7.2  | 1.1 | 0.4 | 0.9 | 0.88541 | 2113.6 | 16.9 | 2134.4 | 9.5  | 2154.5 | 8.6  | 1.9  |
| Spot 58 | 1687400 | 1851295 | 219471.8  | 1.8 | 8.4 | 0.6 | 5.6  | 1.0 | 0.3 | 0.8 | 0.83836 | 1898.7 | 14.0 | 1914.0 | 8.7  | 1930.6 | 9.9  | 1.7  |
| Spot 59 | 2419636 | 2654653 | 205143.1  | 3.1 | 4.9 | 0.7 | 15.3 | 1.2 | 0.5 | 0.9 | 0.80386 | 2821.9 | 21.3 | 2835.5 | 11.0 | 2845.2 | 11.2 | 0.8  |
| Spot 60 | 1452447 | 1593522 | 44239.3   | 1.2 | 6.1 | 0.7 | 10.4 | 1.0 | 0.5 | 0.8 | 0.76440 | 2447.6 | 15.9 | 2468.8 | 9.5  | 2486.4 | 11.1 | 1.6  |
| Spot 61 | 1357847 | 1489733 | 174010.6  | 1.3 | 7.8 | 0.7 | 6.6  | 1.1 | 0.4 | 0.9 | 0.80536 | 2064.6 | 16.2 | 2056.8 | 10.0 | 2048.9 | 11.9 | -0.8 |
| Spot 62 | 1046296 | 1147922 | 23585.0   | 2.3 | 7.1 | 0.7 | 7.5  | 1.1 | 0.4 | 0.9 | 0.77867 | 2109.2 | 16.0 | 2168.9 | 10.3 | 2225.9 | 12.4 | 5.2  |
| Spot 63 | 906558  | 994611  | 54497.0   | 2.4 | 8.3 | 0.6 | 5.4  | 1.0 | 0.3 | 0.8 | 0.80929 | 1841.2 | 12.4 | 1890.2 | 8.2  | 1944.5 | 10.1 | 5.3  |
| Spot 64 | 2548634 | 2796181 | 98395.8   | 4.6 | 7.0 | 0.8 | 8.1  | 1.2 | 0.4 | 1.0 | 0.77485 | 2241.8 | 18.0 | 2239.8 | 11.1 | 2238.0 | 13.4 | -0.2 |
| Spot 65 | 931245  | 1021696 | 80670.4   | 3.8 | 7.6 | 0.7 | 6.9  | 1.2 | 0.4 | 0.9 | 0.78709 | 2080.9 | 16.5 | 2093.7 | 10.4 | 2106.3 | 12.7 | 1.2  |
| Spot 66 | 1630129 | 1788461 | 237287.9  | 1.0 | 8.6 | 0.8 | 5.5  | 1.2 | 0.3 | 0.9 | 0.77873 | 1913.3 | 15.7 | 1896.3 | 10.5 | 1877.8 | 13.8 | -1.9 |
| Spot 67 | 722846  | 793056  | 397941.8  | 1.4 | 7.7 | 0.7 | 6.8  | 1.2 | 0.4 | 1.0 | 0.82532 | 2082.2 | 17.6 | 2085.7 | 10.6 | 2089.3 | 11.9 | 0.3  |
| Spot 68 | 2564050 | 2813094 | 6936.9    | 2.4 | 7.3 | 1.5 | 6.4  | 1.7 | 0.3 | 0.8 | 0.46700 | 1933.1 | 12.9 | 2034.5 | 14.5 | 2138.9 | 25.6 | 9.6  |
| Spot 69 | 1621435 | 1778923 | 121762.2  | 1.8 | 8.2 | 0.8 | 6.1  | 1.2 | 0.4 | 0.9 | 0.77312 | 2004.2 | 16.1 | 1988.3 | 10.5 | 1971.8 | 13.6 | -1.6 |
| Spot 70 | 621549  | 681919  | 1115656.2 | 1.9 | 7.4 | 0.7 | 7.4  | 1.1 | 0.4 | 0.8 | 0.75148 | 2162.0 | 14.9 | 2155.8 | 9.6  | 2150.0 | 12.4 | -0.6 |
| Spot 71 | 2032228 | 2229616 | 96429.2   | 2.3 | 5.4 | 0.8 | 12.4 | 1.4 | 0.5 | 1.2 | 0.82832 | 2579.2 | 24.7 | 2635.2 | 13.2 | 2678.6 | 13.0 | 3.7  |
| Spot 72 | 2186465 | 2398834 | 111739.9  | 3.8 | 7.2 | 0.5 | 7.8  | 1.0 | 0.4 | 0.9 | 0.88238 | 2213.8 | 16.4 | 2208.6 | 8.9  | 2203.7 | 8.1  | -0.5 |
| Spot 73 | 763661  | 837835  | 124311.1  | 1.8 | 7.5 | 0.7 | 7.0  | 1.1 | 0.4 | 0.9 | 0.80427 | 2118.2 | 15.9 | 2117.3 | 9.8  | 2116.4 | 11.4 | -0.1 |
| Spot 74 | 1459925 | 1601726 | 162915.8  | 2.5 | 5.6 | 0.8 | 11.9 | 1.3 | 0.5 | 1.0 | 0.80505 | 2561.6 | 22.2 | 2596.5 | 12.2 | 2623.8 | 12.9 | 2.4  |
| Spot 75 | 977606  | 1072560 | 95048.8   | 4.3 | 7.1 | 0.6 | 7.7  | 1.3 | 0.4 | 1.1 | 0.89014 | 2189.9 | 21.2 | 2201.3 | 11.5 | 2211.8 | 10.1 | 1.0  |
| Spot 76 | 3022656 | 3316244 | 13732.5   | 1.4 | 7.7 | 2.1 | 5.1  | 3.2 | 0.3 | 2.4 | 0.75139 | 1651.6 | 35.5 | 1839.4 | 27.5 | 2059.1 | 37.8 | 19.8 |
| Spot 77 | 1646664 | 1806603 | 111675.3  | 2.6 | 8.6 | 0.6 | 5.4  | 1.2 | 0.3 | 1.1 | 0.86543 | 1889.9 | 17.3 | 1881.6 | 10.4 | 1872.4 | 11.0 | -0.9 |
| Spot 78 | 2224961 | 2441070 | 90144.3   | 3.7 | 7.5 | 0.6 | 6.5  | 1.4 | 0.4 | 1.2 | 0.90382 | 1971.2 | 21.2 | 2042.6 | 12.2 | 2115.5 | 10.4 | 6.8  |
| Spot 79 | 1171650 | 1285452 | 105703.1  | 5.8 | 7.4 | 0.7 | 7.2  | 1.2 | 0.4 | 0.9 | 0.81473 | 2137.3 | 17.2 | 2139.5 | 10.3 | 2141.7 | 11.8 | 0.2  |
| Spot 80 | 2241916 | 2459671 | 9868.6    | 2.5 | 6.6 | 0.8 | 7.1  | 1.1 | 0.3 | 0.9 | 0.74590 | 1895.4 | 14.0 | 2118.6 | 10.1 | 2342.8 | 13.0 | 19.1 |
| Spot 81 | 1275228 | 1399090 | 46271.5   | 0.9 | 8.1 | 0.7 | 6.2  | 1.1 | 0.4 | 0.9 | 0.80417 | 2024.7 | 15.7 | 2004.4 | 9.8  | 1983.5 | 11.9 | -2.1 |
| Spot 82 | 328162  | 360036  | 98484.2   | 2.0 | 7.2 | 0.8 | 7.7  | 1.4 | 0.4 | 1.2 | 0.82592 | 2195.2 | 21.9 | 2192.1 | 12.8 | 2189.1 | 13.9 | -0.3 |
| Spot 83 | 1961061 | 2151537 | 113751.0  | 2.0 | 8.4 | 0.7 | 5.2  | 1.2 | 0.3 | 1.0 | 0.84223 | 1800.8 | 16.4 | 1854.4 | 10.5 | 1914.9 | 12.0 | 6.0  |
| Spot 84 | 1506493 | 1652818 | 576089.2  | 1.9 | 7.9 | 0.6 | 6.6  | 1.1 | 0.4 | 0.9 | 0.82970 | 2072.9 | 16.5 | 2053.5 | 9.9  | 2034.0 | 11.1 | -1.9 |

|          |         |         |           |     |     |     |      |     |     |     |         |        |      |        |      |        |      |      |
|----------|---------|---------|-----------|-----|-----|-----|------|-----|-----|-----|---------|--------|------|--------|------|--------|------|------|
| Spot 85  | 494036  | 542021  | 36395.3   | 3.3 | 7.5 | 0.8 | 7.3  | 1.2 | 0.4 | 0.9 | 0.77843 | 2159.1 | 17.2 | 2143.8 | 10.7 | 2129.1 | 13.2 | -1.4 |
| Spot 86  | 2339454 | 2566683 | 137051.1  | 2.2 | 7.6 | 0.6 | 7.1  | 1.1 | 0.4 | 1.0 | 0.85855 | 2142.6 | 17.7 | 2127.3 | 10.1 | 2112.6 | 10.2 | -1.4 |
| Spot 87  | 340455  | 373523  | 3671512.4 | 2.9 | 6.2 | 0.8 | 10.5 | 1.4 | 0.5 | 1.1 | 0.80469 | 2500.4 | 23.8 | 2477.3 | 13.2 | 2458.4 | 14.3 | -1.7 |
| Spot 88  | 1768338 | 1940095 | 24082.2   | 1.6 | 8.2 | 0.8 | 5.6  | 1.2 | 0.3 | 0.8 | 0.69063 | 1865.6 | 13.0 | 1913.2 | 10.0 | 1965.3 | 15.0 | 5.1  |
| Spot 89  | 1772281 | 1944420 | 16038.3   | 1.8 | 8.0 | 0.5 | 6.0  | 1.0 | 0.4 | 0.8 | 0.85124 | 1941.2 | 13.6 | 1973.6 | 8.3  | 2007.6 | 8.9  | 3.3  |
| Spot 90  | 2752776 | 3020150 | 1284527.9 | 2.4 | 7.2 | 0.6 | 7.7  | 1.2 | 0.4 | 1.0 | 0.85540 | 2194.5 | 18.9 | 2200.6 | 10.7 | 2206.2 | 10.7 | 0.5  |
| Spot 91  | 2018743 | 2214822 | 20613.9   | 1.8 | 7.0 | 0.8 | 8.0  | 1.5 | 0.4 | 1.2 | 0.84084 | 2229.9 | 23.2 | 2231.7 | 13.2 | 2233.3 | 13.7 | 0.2  |
| Spot 92  | 2335735 | 2562602 | 239659.9  | 2.3 | 5.4 | 0.7 | 12.9 | 1.3 | 0.5 | 1.1 | 0.85220 | 2673.3 | 23.5 | 2673.5 | 11.9 | 2673.6 | 10.9 | 0.0  |
| Spot 93  | 2683639 | 2944299 | 24232.4   | 1.3 | 8.2 | 1.0 | 5.5  | 1.3 | 0.3 | 0.9 | 0.67517 | 1837.4 | 14.1 | 1900.3 | 11.2 | 1969.8 | 17.1 | 6.7  |
| Spot 94  | 1921807 | 2108470 | 262372.7  | 3.8 | 5.0 | 0.6 | 14.9 | 1.2 | 0.5 | 1.1 | 0.88868 | 2817.3 | 25.1 | 2807.1 | 11.8 | 2799.7 | 9.3  | -0.6 |
| Spot 95  | 1813616 | 1989771 | 165091.8  | 3.0 | 8.5 | 0.7 | 5.4  | 1.3 | 0.3 | 1.1 | 0.84752 | 1878.9 | 18.2 | 1892.2 | 11.3 | 1906.8 | 12.6 | 1.5  |
| Spot 96  | 1924422 | 2111339 | 251435.0  | 1.5 | 7.5 | 0.4 | 7.2  | 0.9 | 0.4 | 0.8 | 0.86934 | 2151.0 | 14.2 | 2137.6 | 8.0  | 2124.8 | 7.8  | -1.2 |
| Spot 97  | 3026574 | 3320542 | 168284.5  | 1.9 | 5.4 | 0.6 | 13.0 | 1.2 | 0.5 | 1.0 | 0.87431 | 2679.2 | 22.9 | 2676.8 | 11.3 | 2675.0 | 9.6  | -0.2 |
| Spot 98  | 2348786 | 2576922 | 5251140.1 | 3.6 | 7.5 | 0.6 | 7.0  | 1.2 | 0.4 | 1.0 | 0.83755 | 2108.2 | 17.8 | 2114.9 | 10.5 | 2121.4 | 11.3 | 0.6  |
| Spot 99  | 868851  | 953242  | 100806.9  | 3.2 | 7.5 | 0.7 | 7.4  | 1.3 | 0.4 | 1.1 | 0.84598 | 2205.1 | 20.8 | 2159.3 | 11.8 | 2116.1 | 12.3 | -4.2 |
| Spot 100 | 2460007 | 2698945 | 100555.4  | 2.8 | 5.8 | 0.5 | 11.4 | 1.3 | 0.5 | 1.2 | 0.92625 | 2534.5 | 24.8 | 2554.5 | 11.9 | 2570.4 | 8.1  | 1.4  |
| Spot 101 | 1702243 | 1867580 | 29924.7   | 1.3 | 8.3 | 0.5 | 5.7  | 1.0 | 0.3 | 0.8 | 0.85725 | 1926.1 | 13.7 | 1931.2 | 8.3  | 1936.7 | 8.8  | 0.6  |
| Spot 102 | 2826080 | 3100574 | 49211.1   | 1.2 | 8.3 | 0.7 | 5.6  | 1.3 | 0.3 | 1.0 | 0.81848 | 1881.2 | 17.0 | 1910.1 | 11.0 | 1941.8 | 13.1 | 3.1  |
| Spot 103 | 927368  | 1017443 | 57884.5   | 1.1 | 8.0 | 0.7 | 6.4  | 1.1 | 0.4 | 0.9 | 0.78636 | 2047.6 | 15.0 | 2030.4 | 9.5  | 2012.8 | 11.9 | -1.7 |
| Spot 104 | 1232606 | 1352327 | 59791.6   | 1.7 | 8.5 | 0.6 | 5.5  | 1.0 | 0.3 | 0.8 | 0.82546 | 1890.6 | 13.6 | 1897.8 | 8.6  | 1905.6 | 10.2 | 0.8  |
| Spot 105 | 1671757 | 1834133 | 86023.9   | 1.2 | 5.0 | 0.5 | 14.8 | 1.1 | 0.5 | 0.9 | 0.87189 | 2808.5 | 21.2 | 2804.7 | 10.2 | 2801.9 | 8.6  | -0.2 |
| Spot 106 | 1691846 | 1856173 | 98415.2   | 1.8 | 8.2 | 0.6 | 5.8  | 1.2 | 0.3 | 1.1 | 0.87050 | 1930.9 | 18.1 | 1944.1 | 10.8 | 1958.2 | 11.0 | 1.4  |
| Spot 107 | 1082075 | 1187176 | 152437.7  | 2.2 | 8.5 | 0.8 | 5.6  | 1.2 | 0.3 | 0.9 | 0.76072 | 1927.5 | 15.8 | 1919.8 | 10.8 | 1911.4 | 14.5 | -0.8 |
| Spot 108 | 1061677 | 1164796 | 152464.8  | 3.1 | 5.5 | 0.5 | 13.1 | 1.0 | 0.5 | 0.8 | 0.85546 | 2717.5 | 18.7 | 2687.4 | 9.3  | 2664.9 | 8.4  | -2.0 |
| Spot 109 | 525967  | 577054  | 109488.7  | 1.9 | 6.9 | 0.7 | 8.6  | 1.3 | 0.4 | 1.1 | 0.84926 | 2328.2 | 20.8 | 2293.5 | 11.4 | 2262.7 | 11.4 | -2.9 |
| Spot 110 | 1908056 | 2093383 | 196264.1  | 1.5 | 8.5 | 0.5 | 5.4  | 0.9 | 0.3 | 0.7 | 0.78417 | 1880.8 | 11.0 | 1890.5 | 7.3  | 1901.3 | 9.6  | 1.1  |
| Spot 111 | 2054651 | 2254217 | 86595.5   | 2.0 | 8.6 | 0.6 | 5.1  | 1.2 | 0.3 | 1.1 | 0.88929 | 1787.9 | 16.8 | 1835.7 | 10.3 | 1890.3 | 10.0 | 5.4  |
| Spot 112 | 1978819 | 2171019 | 103478.7  | 0.8 | 8.1 | 0.5 | 6.1  | 1.1 | 0.4 | 1.0 | 0.89044 | 2001.8 | 16.6 | 1995.8 | 9.4  | 1989.7 | 8.7  | -0.6 |
| Spot 113 | 697002  | 764701  | 676786.2  | 2.0 | 7.0 | 0.7 | 8.3  | 1.1 | 0.4 | 0.9 | 0.77432 | 2275.3 | 16.9 | 2264.0 | 10.3 | 2253.8 | 12.4 | -1.0 |
| Spot 114 | 201718  | 221310  | 66162.0   | 1.7 | 7.4 | 0.8 | 7.4  | 1.1 | 0.4 | 0.8 | 0.73260 | 2158.7 | 15.1 | 2155.8 | 10.1 | 2153.0 | 13.4 | -0.3 |
| Spot 115 | 2342669 | 2570210 | 89567.1   | 1.6 | 5.3 | 0.6 | 13.3 | 1.9 | 0.5 | 1.8 | 0.95664 | 2682.2 | 40.3 | 2700.8 | 18.1 | 2714.8 | 9.2  | 1.2  |
| Spot 116 | 820212  | 899878  | 39995.3   | 2.4 | 4.9 | 0.5 | 16.0 | 0.9 | 0.6 | 0.8 | 0.81687 | 2909.3 | 18.0 | 2875.2 | 9.0  | 2851.4 | 8.8  | -2.0 |
| Spot 117 | 816972  | 896324  | 4937.1    | 3.4 | 6.3 | 1.0 | 9.2  | 1.5 | 0.4 | 1.1 | 0.71386 | 2287.6 | 20.3 | 2354.2 | 13.5 | 2412.3 | 17.6 | 5.2  |
| Spot 118 | 992998  | 1089447 | 891907.7  | 1.9 | 3.7 | 0.5 | 24.2 | 1.2 | 0.7 | 1.1 | 0.92105 | 3268.7 | 28.7 | 3276.2 | 11.9 | 3280.8 | 7.4  | 0.4  |
| Spot 119 | 2099529 | 2303455 | 1464158.2 | 2.2 | 8.6 | 0.7 | 5.5  | 1.3 | 0.3 | 1.1 | 0.85511 | 1910.3 | 18.5 | 1901.4 | 11.3 | 1891.7 | 12.2 | -1.0 |
| Spot 120 | 1734207 | 1902649 | 85408.8   | 2.6 | 8.4 | 0.7 | 5.6  | 1.2 | 0.3 | 1.0 | 0.83844 | 1910.9 | 17.3 | 1917.6 | 10.8 | 1924.9 | 12.2 | 0.7  |
| Spot 121 | 2681227 | 2941652 | 1051065.6 | 3.8 | 5.5 | 0.6 | 12.7 | 1.2 | 0.5 | 1.1 | 0.89257 | 2652.1 | 24.0 | 2661.1 | 11.6 | 2667.9 | 9.2  | 0.6  |
| Spot 122 | 1515093 | 1662253 | 320874.3  | 1.2 | 7.8 | 0.5 | 6.9  | 1.0 | 0.4 | 0.9 | 0.85317 | 2149.8 | 15.6 | 2101.7 | 8.9  | 2055.0 | 9.2  | -4.6 |
| Spot 123 | 1059963 | 1162916 | 1694433.4 | 1.5 | 5.3 | 0.6 | 13.7 | 1.1 | 0.5 | 0.9 | 0.82330 | 2753.8 | 21.1 | 2727.3 | 10.8 | 2707.6 | 10.7 | -1.7 |
| Spot 124 | 1723208 | 1890581 | 1244340.7 | 2.8 | 5.4 | 0.7 | 12.9 | 1.2 | 0.5 | 1.0 | 0.82589 | 2678.6 | 21.7 | 2674.1 | 11.3 | 2670.6 | 11.2 | -0.3 |
| Spot 125 | 1397487 | 1533223 | 66735.9   | 1.0 | 8.5 | 0.5 | 5.4  | 1.0 | 0.3 | 0.8 | 0.84011 | 1852.8 | 13.2 | 1878.3 | 8.3  | 1906.5 | 9.5  | 2.8  |
| Spot 126 | 2019037 | 2215145 | 9410.4    | 2.8 | 6.0 | 0.7 | 9.7  | 1.2 | 0.4 | 0.9 | 0.79434 | 2293.5 | 17.9 | 2407.8 | 10.8 | 2505.8 | 11.9 | 8.5  |
| Spot 127 | 1604954 | 1760841 | 92695.5   | 3.1 | 8.5 | 0.6 | 5.6  | 1.1 | 0.3 | 0.9 | 0.83407 | 1926.9 | 14.7 | 1909.5 | 9.1  | 1890.7 | 10.5 | -1.9 |

|          |         |         |          |      |     |     |      |     |     |     |         |        |      |        |      |        |      |      |
|----------|---------|---------|----------|------|-----|-----|------|-----|-----|-----|---------|--------|------|--------|------|--------|------|------|
| Spot 128 | 566634  | 621671  | 63815.9  | 3.0  | 4.9 | 0.7 | 15.3 | 1.2 | 0.5 | 1.0 | 0.82839 | 2821.3 | 22.7 | 2831.1 | 11.4 | 2838.1 | 10.9 | 0.6  |
| Spot 129 | 1123852 | 1233011 | 106405.5 | 1.0  | 5.3 | 0.4 | 13.1 | 0.8 | 0.5 | 0.7 | 0.83110 | 2664.9 | 14.2 | 2686.4 | 7.4  | 2702.6 | 7.2  | 1.4  |
| Spot 130 | 3343227 | 3667951 | 448765.6 | 3.4  | 5.3 | 0.6 | 12.9 | 1.5 | 0.5 | 1.3 | 0.90467 | 2635.8 | 29.1 | 2674.6 | 14.0 | 2704.1 | 10.4 | 2.5  |
| Spot 131 | 2538460 | 2785018 | 91748.9  | 3.0  | 7.6 | 0.6 | 6.8  | 1.3 | 0.4 | 1.1 | 0.89120 | 2085.8 | 20.3 | 2091.0 | 11.3 | 2096.2 | 10.2 | 0.5  |
| Spot 132 | 903173  | 990898  | 118171.4 | 3.9  | 7.5 | 0.6 | 7.4  | 1.3 | 0.4 | 1.2 | 0.88406 | 2216.4 | 22.1 | 2163.7 | 11.9 | 2114.1 | 10.9 | -4.8 |
| Spot 133 | 3142441 | 3447664 | 110141.6 | 2.0  | 5.4 | 0.5 | 12.7 | 1.2 | 0.5 | 1.1 | 0.89210 | 2635.4 | 23.1 | 2660.7 | 11.3 | 2680.0 | 8.9  | 1.7  |
| Spot 134 | 1523671 | 1671664 | 166371.9 | 6.7  | 7.6 | 0.6 | 6.8  | 1.1 | 0.4 | 0.9 | 0.84267 | 2061.8 | 16.7 | 2086.3 | 10.0 | 2110.5 | 10.6 | 2.3  |
| Spot 135 | 730249  | 801177  | 352225.6 | 1.8  | 7.2 | 0.6 | 7.8  | 1.1 | 0.4 | 0.9 | 0.82648 | 2209.9 | 16.6 | 2204.5 | 9.6  | 2199.4 | 10.5 | -0.5 |
| Spot 136 | 1536098 | 1685298 | 384847.4 | 2.1  | 5.4 | 0.5 | 13.1 | 0.9 | 0.5 | 0.7 | 0.77950 | 2709.4 | 14.9 | 2689.0 | 8.1  | 2673.7 | 8.9  | -1.3 |
| Spot 137 | 1958377 | 2148592 | 93419.8  | 2.5  | 5.4 | 0.6 | 13.0 | 1.1 | 0.5 | 0.9 | 0.83825 | 2665.7 | 20.5 | 2677.5 | 10.6 | 2686.4 | 10.1 | 0.8  |
| Spot 138 | 1757648 | 1928367 | 120418.3 | 2.6  | 5.4 | 0.6 | 13.0 | 1.1 | 0.5 | 0.9 | 0.84959 | 2679.4 | 19.6 | 2678.6 | 9.9  | 2678.0 | 9.2  | -0.1 |
| Spot 139 | 1317135 | 1445067 | 205691.8 | 0.9  | 7.7 | 0.6 | 6.9  | 1.2 | 0.4 | 1.0 | 0.86659 | 2138.7 | 18.7 | 2103.6 | 10.5 | 2069.5 | 10.4 | -3.3 |
| Spot 140 | 1539490 | 1689019 | 59948.6  | 2.0  | 7.2 | 0.5 | 7.3  | 0.8 | 0.4 | 0.7 | 0.79763 | 2103.0 | 12.1 | 2150.2 | 7.6  | 2195.6 | 8.9  | 4.2  |
| Spot 141 | 1212466 | 1330232 | 89803.1  | 2.4  | 7.2 | 0.7 | 7.6  | 1.2 | 0.4 | 0.9 | 0.80438 | 2155.7 | 17.4 | 2182.0 | 10.6 | 2206.8 | 12.1 | 2.3  |
| Spot 142 | 3197269 | 3507816 | 105904.2 | 2.2  | 6.5 | 0.5 | 9.2  | 1.1 | 0.4 | 1.0 | 0.90114 | 2339.8 | 18.9 | 2355.5 | 9.8  | 2369.2 | 7.9  | 1.2  |
| Spot 143 | 1543549 | 1693473 | 199673.6 | 2.1  | 6.9 | 0.5 | 8.6  | 0.9 | 0.4 | 0.8 | 0.86187 | 2314.2 | 15.9 | 2292.3 | 8.6  | 2272.7 | 8.3  | -1.8 |
| Spot 144 | 1774157 | 1946479 | #####    | 2.1  | 7.6 | 0.5 | 7.0  | 1.0 | 0.4 | 0.8 | 0.82857 | 2117.0 | 14.3 | 2112.2 | 8.5  | 2107.5 | 9.4  | -0.5 |
| Spot 145 | 2255967 | 2475087 | 184982.7 | 4.0  | 7.6 | 0.6 | 7.0  | 1.3 | 0.4 | 1.1 | 0.88992 | 2099.1 | 20.3 | 2106.4 | 11.3 | 2113.6 | 10.2 | 0.7  |
| Spot 146 | 2317997 | 2543142 | 24160.4  | 2.2  | 8.1 | 0.7 | 5.6  | 1.1 | 0.3 | 0.8 | 0.75567 | 1866.0 | 13.3 | 1921.6 | 9.4  | 1982.1 | 12.7 | 5.9  |
| Spot 147 | 3705966 | 4065923 | 38500.7  | 7.6  | 7.4 | 0.6 | 6.9  | 1.1 | 0.4 | 0.9 | 0.81031 | 2057.4 | 15.0 | 2103.6 | 9.3  | 2149.1 | 10.8 | 4.3  |
| Spot 148 | 179204  | 196610  | 101068.3 | 11.0 | 5.8 | 0.9 | 12.1 | 1.6 | 0.5 | 1.3 | 0.83053 | 2661.9 | 28.2 | 2611.8 | 14.6 | 2573.2 | 14.5 | -3.4 |
| Spot 149 | 988202  | 1084185 | 106646.9 | 2.0  | 7.4 | 0.6 | 7.6  | 1.2 | 0.4 | 1.0 | 0.86446 | 2215.7 | 19.3 | 2183.8 | 10.7 | 2154.0 | 10.5 | -2.9 |
| Spot 150 | 1706011 | 1871714 | 283490.6 | 16.4 | 7.5 | 0.7 | 7.0  | 1.0 | 0.4 | 0.8 | 0.76118 | 2106.9 | 14.2 | 2115.4 | 9.2  | 2123.7 | 11.8 | 0.8  |
| Spot 151 | 1615379 | 1772279 | 99035.7  | 1.2  | 7.2 | 0.7 | 7.8  | 1.1 | 0.4 | 0.9 | 0.81216 | 2212.7 | 17.2 | 2203.9 | 10.1 | 2195.7 | 11.4 | -0.8 |
| Spot 152 | 2177454 | 2388948 | 27510.5  | 1.8  | 8.2 | 0.9 | 5.5  | 1.4 | 0.3 | 1.1 | 0.78046 | 1828.9 | 17.7 | 1895.9 | 12.2 | 1970.0 | 15.8 | 7.2  |
| Spot 153 | 4274146 | 4689289 | 392067.2 | 2.7  | 7.6 | 0.5 | 6.8  | 1.4 | 0.4 | 1.3 | 0.93224 | 2050.7 | 22.3 | 2079.4 | 12.0 | 2107.9 | 8.6  | 2.7  |
| Spot 154 | 1854210 | 2034308 | 367503.8 | 2.5  | 7.8 | 0.6 | 6.5  | 1.0 | 0.4 | 0.8 | 0.81026 | 2038.8 | 13.5 | 2044.7 | 8.4  | 2050.6 | 9.8  | 0.6  |
| Spot 155 | 1562890 | 1714692 | 104628.9 | 1.7  | 7.6 | 0.6 | 7.0  | 1.2 | 0.4 | 1.1 | 0.87177 | 2120.3 | 19.6 | 2109.7 | 11.1 | 2099.3 | 10.7 | -1.0 |
| Spot 156 | 2582739 | 2833598 | 37482.5  | 1.3  | 7.4 | 0.7 | 6.7  | 1.4 | 0.4 | 1.2 | 0.84429 | 2009.4 | 20.4 | 2072.6 | 12.4 | 2136.1 | 13.1 | 5.9  |
| Spot 157 | 1378033 | 1511880 | 119295.8 | 1.6  | 7.6 | 0.6 | 6.9  | 1.1 | 0.4 | 1.0 | 0.84888 | 2091.2 | 17.2 | 2096.7 | 10.0 | 2102.0 | 10.5 | 0.5  |
| Spot 158 | 1572817 | 1725583 | 291714.1 | 5.5  | 7.5 | 0.7 | 7.1  | 1.1 | 0.4 | 0.9 | 0.78619 | 2130.1 | 16.2 | 2128.8 | 10.1 | 2127.5 | 12.3 | -0.1 |
| Spot 159 | 1111096 | 1219016 | 89617.9  | 0.9  | 5.4 | 0.5 | 12.9 | 1.0 | 0.5 | 0.8 | 0.84394 | 2645.5 | 17.8 | 2670.4 | 9.1  | 2689.3 | 8.6  | 1.6  |
| Spot 160 | 1170294 | 1283964 | 226913.9 | 3.4  | 6.0 | 0.6 | 10.7 | 1.2 | 0.5 | 1.0 | 0.87487 | 2501.0 | 21.3 | 2496.9 | 10.9 | 2493.6 | 9.6  | -0.3 |
| Spot 161 | 2443909 | 2681284 | 405773.7 | 2.4  | 5.4 | 0.6 | 12.8 | 1.3 | 0.5 | 1.2 | 0.88736 | 2650.2 | 25.5 | 2662.8 | 12.5 | 2672.3 | 10.1 | 0.8  |
| Spot 162 | 1013043 | 1111438 | 16659.9  | 3.3  | 7.9 | 1.6 | 6.6  | 2.1 | 0.4 | 1.2 | 0.59817 | 2094.2 | 22.2 | 2055.4 | 18.3 | 2016.7 | 29.5 | -3.8 |
| Spot 163 | 1527559 | 1675930 | 41372.1  | 1.5  | 8.4 | 0.6 | 5.4  | 1.2 | 0.3 | 1.1 | 0.85972 | 1854.4 | 17.3 | 1884.5 | 10.7 | 1917.8 | 11.4 | 3.3  |
| Spot 164 | 2273113 | 2493898 | 97376.0  | 1.6  | 8.5 | 0.7 | 5.5  | 1.2 | 0.3 | 0.9 | 0.79284 | 1898.9 | 15.3 | 1900.5 | 10.1 | 1902.2 | 12.8 | 0.2  |
| Spot 165 | 1392276 | 1527507 | 547103.2 | 1.5  | 7.9 | 0.6 | 6.2  | 1.0 | 0.4 | 0.8 | 0.80297 | 1963.1 | 13.4 | 1998.2 | 8.6  | 2034.7 | 10.4 | 3.5  |
| Spot 166 | 1097078 | 1203636 | 290456.3 | 2.0  | 7.5 | 0.7 | 7.2  | 1.2 | 0.4 | 1.0 | 0.82048 | 2138.4 | 17.6 | 2135.3 | 10.5 | 2132.3 | 11.8 | -0.3 |
| Spot 167 | 688967  | 755885  | 42269.9  | 3.1  | 7.5 | 0.7 | 7.1  | 1.2 | 0.4 | 0.9 | 0.77881 | 2126.8 | 16.5 | 2123.5 | 10.4 | 2120.3 | 12.9 | -0.3 |
| Spot 168 | 638510  | 700528  | 238921.7 | 2.3  | 4.6 | 0.7 | 17.5 | 1.2 | 0.6 | 1.0 | 0.82883 | 2984.2 | 24.4 | 2961.1 | 11.8 | 2945.5 | 11.1 | -1.3 |
| Spot 169 | 490763  | 538430  | 48708.0  | 1.6  | 8.2 | 0.7 | 6.2  | 1.3 | 0.4 | 1.1 | 0.82370 | 2037.7 | 18.9 | 1997.8 | 11.5 | 1956.8 | 13.3 | -4.1 |
| Spot 170 | 1501258 | 1647074 | 159385.4 | 11.2 | 5.8 | 0.6 | 11.5 | 1.2 | 0.5 | 1.0 | 0.85689 | 2558.3 | 21.1 | 2567.0 | 10.9 | 2573.8 | 10.0 | 0.6  |

|          |         |         |           |     |     |     |      |     |     |     |         |        |      |        |      |        |      |      |
|----------|---------|---------|-----------|-----|-----|-----|------|-----|-----|-----|---------|--------|------|--------|------|--------|------|------|
| Spot 171 | 1805906 | 1981312 | 18306.3   | 1.9 | 8.0 | 0.9 | 5.6  | 1.5 | 0.3 | 1.2 | 0.78713 | 1836.3 | 18.4 | 1918.0 | 12.6 | 2007.3 | 16.0 | 8.5  |
| Spot 172 | 916428  | 1005440 | 1366660.2 | 1.8 | 5.5 | 0.6 | 12.8 | 1.2 | 0.5 | 1.0 | 0.83264 | 2689.6 | 21.1 | 2667.7 | 10.9 | 2651.1 | 10.6 | -1.5 |
| Spot 173 | 3496401 | 3836003 | 299452.1  | 1.8 | 8.5 | 0.6 | 5.4  | 0.9 | 0.3 | 0.8 | 0.79908 | 1862.9 | 12.3 | 1880.4 | 8.1  | 1899.6 | 10.2 | 1.9  |
| Spot 174 | 1773979 | 1946283 | 97042.3   | 1.9 | 5.4 | 0.5 | 13.1 | 1.0 | 0.5 | 0.9 | 0.83990 | 2692.4 | 18.7 | 2690.4 | 9.6  | 2688.9 | 9.1  | -0.1 |
| Spot 175 | 1599084 | 1754401 | 357285.3  | 1.3 | 3.8 | 0.6 | 23.5 | 1.1 | 0.7 | 0.9 | 0.85549 | 3252.4 | 23.5 | 3249.9 | 10.5 | 3248.3 | 8.8  | -0.1 |
| Spot 176 | 1600156 | 1755578 | 1736361.9 | 1.8 | 5.5 | 0.5 | 12.9 | 1.2 | 0.5 | 1.1 | 0.89604 | 2689.2 | 23.8 | 2673.6 | 11.4 | 2661.8 | 8.9  | -1.0 |
| Spot 177 | 1852285 | 2032196 | 799695.6  | 1.7 | 4.6 | 0.7 | 16.7 | 1.1 | 0.6 | 0.9 | 0.77354 | 2874.8 | 20.3 | 2919.0 | 10.8 | 2949.7 | 11.6 | 2.5  |
| Spot 178 | 1755290 | 1925780 | 10928.0   | 2.9 | 6.9 | 1.1 | 7.8  | 1.7 | 0.4 | 1.2 | 0.74166 | 2146.6 | 22.6 | 2207.5 | 15.0 | 2264.5 | 19.3 | 5.2  |
| Spot 179 | 1910558 | 2096129 | 154464.1  | 2.1 | 5.4 | 0.5 | 12.8 | 0.9 | 0.5 | 0.8 | 0.83434 | 2650.2 | 17.1 | 2662.6 | 8.9  | 2672.0 | 8.6  | 0.8  |
| Spot 180 | 1644125 | 1803817 | 92018.5   | 1.6 | 7.5 | 0.5 | 7.0  | 0.9 | 0.4 | 0.7 | 0.81509 | 2115.4 | 13.4 | 2114.8 | 8.1  | 2114.2 | 9.2  | -0.1 |
| Spot 181 | 1564774 | 1716758 | 1071001.0 | 2.5 | 5.4 | 0.8 | 13.1 | 1.1 | 0.5 | 0.8 | 0.70509 | 2695.3 | 16.8 | 2687.0 | 10.2 | 2680.7 | 12.7 | -0.5 |
| Spot 182 | 1388286 | 1523129 | 116985.2  | 2.1 | 8.5 | 0.6 | 5.3  | 1.0 | 0.3 | 0.8 | 0.78937 | 1840.8 | 12.5 | 1869.2 | 8.5  | 1901.0 | 10.9 | 3.2  |
| Spot 183 | 647565  | 710462  | 90928.5   | 3.2 | 8.6 | 0.7 | 5.6  | 1.2 | 0.4 | 1.0 | 0.81657 | 1953.4 | 16.3 | 1914.6 | 10.2 | 1872.8 | 12.3 | -4.3 |
| Spot 184 | 1949691 | 2139063 | 113720.1  | 2.4 | 7.7 | 0.6 | 6.7  | 1.1 | 0.4 | 0.9 | 0.79758 | 2069.6 | 15.0 | 2068.6 | 9.4  | 2067.5 | 11.3 | -0.1 |
| Spot 185 | 318200  | 349106  | 458956.7  | 1.4 | 3.7 | 0.7 | 24.3 | 1.3 | 0.7 | 1.0 | 0.82772 | 3272.4 | 26.6 | 3279.7 | 12.2 | 3284.2 | 11.1 | 0.4  |
| Spot 186 | 2073975 | 2275418 | 97327.1   | 2.5 | 7.2 | 0.7 | 7.8  | 1.3 | 0.4 | 1.1 | 0.84921 | 2222.5 | 20.4 | 2206.3 | 11.5 | 2191.2 | 11.8 | -1.4 |
| Spot 187 | 3573834 | 3920957 | 245640.1  | 2.6 | 5.5 | 0.7 | 12.2 | 1.1 | 0.5 | 0.9 | 0.78882 | 2577.6 | 18.9 | 2621.8 | 10.6 | 2656.1 | 11.5 | 3.0  |
| Spot 188 | 1416097 | 1553642 | 36138.0   | 2.1 | 8.4 | 0.5 | 5.7  | 0.8 | 0.4 | 0.6 | 0.76879 | 1943.5 | 10.2 | 1930.3 | 6.8  | 1916.3 | 9.1  | -1.4 |
| Spot 189 | 1916558 | 2102711 | 133451.2  | 1.8 | 8.4 | 0.7 | 5.6  | 1.2 | 0.3 | 1.0 | 0.82599 | 1923.8 | 16.5 | 1917.8 | 10.3 | 1911.2 | 12.1 | -0.7 |
| Spot 190 | 941658  | 1033120 | 10745.0   | 1.8 | 7.1 | 0.7 | 7.5  | 1.1 | 0.4 | 0.9 | 0.77608 | 2139.1 | 15.9 | 2178.9 | 10.1 | 2216.6 | 12.3 | 3.5  |
| Spot 191 | 2146719 | 2355227 | 209283.9  | 2.4 | 5.4 | 0.6 | 12.9 | 1.2 | 0.5 | 1.0 | 0.86216 | 2659.3 | 22.6 | 2670.7 | 11.3 | 2679.3 | 10.1 | 0.7  |
| Spot 192 | 2317707 | 2542823 | 227884.8  | 2.0 | 7.6 | 0.7 | 6.9  | 1.4 | 0.4 | 1.1 | 0.84976 | 2092.2 | 20.5 | 2094.7 | 12.0 | 2097.2 | 12.5 | 0.2  |
| Spot 193 | 536604  | 588724  | 36158.9   | 2.8 | 7.5 | 0.6 | 7.2  | 1.1 | 0.4 | 0.9 | 0.83296 | 2138.8 | 16.0 | 2130.3 | 9.4  | 2122.1 | 10.2 | -0.8 |
| Spot 194 | 2501023 | 2743945 | 107305.4  | 1.7 | 5.6 | 0.6 | 12.3 | 1.1 | 0.5 | 0.9 | 0.83167 | 2627.7 | 19.8 | 2630.9 | 10.3 | 2633.3 | 10.2 | 0.2  |
| Spot 195 | 1588007 | 1742249 | 74069.0   | 1.1 | 7.9 | 0.7 | 6.4  | 1.1 | 0.4 | 0.9 | 0.76634 | 2027.3 | 14.9 | 2031.4 | 9.8  | 2035.5 | 12.7 | 0.4  |
| Spot 196 | 2128153 | 2334858 | 163818.2  | 2.5 | 5.6 | 0.5 | 12.3 | 0.9 | 0.5 | 0.8 | 0.86612 | 2634.2 | 17.7 | 2631.1 | 8.9  | 2628.7 | 7.8  | -0.2 |
| Spot 197 | 1347732 | 1478636 | 41290.9   | 2.6 | 8.3 | 0.7 | 5.6  | 1.1 | 0.3 | 0.9 | 0.80773 | 1908.2 | 15.1 | 1918.4 | 9.8  | 1929.3 | 12.0 | 1.1  |
| Spot 198 | 632312  | 693728  | 560583.2  | 2.0 | 4.2 | 0.7 | 19.6 | 1.1 | 0.6 | 0.9 | 0.79879 | 3056.3 | 21.3 | 3070.4 | 10.6 | 3079.6 | 10.5 | 0.8  |
| Spot 199 | 2073244 | 2274617 | 200351.5  | 2.7 | 6.9 | 0.6 | 8.4  | 1.1 | 0.4 | 1.0 | 0.85045 | 2277.9 | 18.6 | 2271.9 | 10.4 | 2266.5 | 10.4 | -0.5 |
| Spot 200 | 962940  | 1056469 | 184104.5  | 4.8 | 5.0 | 0.6 | 15.2 | 1.2 | 0.6 | 1.0 | 0.86896 | 2855.0 | 23.6 | 2829.7 | 11.2 | 2811.7 | 9.5  | -1.5 |
| Spot 201 | 1929786 | 2117224 | 159037.0  | 1.9 | 7.1 | 0.7 | 7.7  | 1.1 | 0.4 | 0.8 | 0.72629 | 2181.5 | 14.2 | 2199.9 | 9.5  | 2217.1 | 12.6 | 1.6  |
| Spot 202 | 512022  | 561754  | 75246.6   | 2.5 | 7.6 | 0.8 | 7.2  | 1.3 | 0.4 | 1.0 | 0.78250 | 2186.9 | 18.3 | 2138.1 | 11.2 | 2091.6 | 13.8 | -4.6 |
| Spot 203 | 2320630 | 2546031 | 27766.1   | 3.4 | 7.1 | 0.8 | 8.0  | 1.2 | 0.4 | 0.9 | 0.75112 | 2244.3 | 16.5 | 2232.5 | 10.5 | 2221.8 | 13.3 | -1.0 |
| Spot 204 | 581289  | 637749  | 356101.1  | 2.2 | 7.2 | 0.8 | 7.7  | 1.3 | 0.4 | 1.0 | 0.79332 | 2185.0 | 19.0 | 2194.0 | 11.6 | 2202.4 | 13.7 | 0.8  |
| Spot 205 | 1678243 | 1841249 | 12538.1   | 1.7 | 7.9 | 0.8 | 5.9  | 1.0 | 0.3 | 0.6 | 0.58208 | 1899.6 | 9.6  | 1956.0 | 8.7  | 2016.3 | 14.5 | 5.8  |
| Spot 206 | 1566882 | 1719072 | 95805.2   | 2.0 | 7.6 | 0.7 | 7.0  | 1.1 | 0.4 | 0.9 | 0.80429 | 2129.8 | 16.4 | 2108.3 | 10.0 | 2087.4 | 11.8 | -2.0 |
| Spot 207 | 1291999 | 1417489 | 253624.5  | 1.5 | 7.5 | 0.6 | 7.5  | 1.1 | 0.4 | 0.9 | 0.83002 | 2219.0 | 17.2 | 2167.4 | 9.9  | 2119.0 | 10.8 | -4.7 |
| Spot 208 | 1061294 | 1164376 | 195656.2  | 1.6 | 5.5 | 0.6 | 12.7 | 1.1 | 0.5 | 1.0 | 0.84798 | 2646.0 | 20.9 | 2654.3 | 10.7 | 2660.7 | 10.0 | 0.6  |
| Spot 209 | 2583358 | 2834277 | 45688.4   | 1.5 | 8.3 | 0.4 | 5.2  | 0.8 | 0.3 | 0.7 | 0.85380 | 1788.2 | 11.3 | 1857.2 | 7.2  | 1935.3 | 7.9  | 7.6  |
| Spot 210 | 570215  | 625600  | 114295.8  | 2.3 | 7.4 | 0.7 | 7.3  | 1.4 | 0.4 | 1.2 | 0.86998 | 2164.6 | 22.1 | 2154.1 | 12.3 | 2144.1 | 11.9 | -1.0 |
| Spot 211 | 358975  | 393842  | 97810.7   | 0.7 | 7.5 | 0.7 | 6.9  | 1.6 | 0.4 | 1.4 | 0.89738 | 2085.2 | 25.0 | 2104.6 | 13.9 | 2123.7 | 12.1 | 1.8  |
| Spot 212 | 1403207 | 1539499 | 96126.5   | 3.5 | 7.1 | 0.7 | 8.0  | 1.2 | 0.4 | 0.9 | 0.77727 | 2229.0 | 16.9 | 2228.0 | 10.4 | 2227.1 | 12.5 | -0.1 |
| Spot 213 | 1711070 | 1877265 | 168608.5  | 3.1 | 7.8 | 0.5 | 6.7  | 0.9 | 0.4 | 0.7 | 0.83082 | 2086.2 | 13.1 | 2073.9 | 7.8  | 2061.7 | 8.7  | -1.2 |

|          |         |         |           |     |     |     |      |     |     |     |         |        |      |        |      |        |      |      |
|----------|---------|---------|-----------|-----|-----|-----|------|-----|-----|-----|---------|--------|------|--------|------|--------|------|------|
| Spot 214 | 2442231 | 2679443 | 1056965.1 | 3.2 | 7.6 | 0.6 | 6.9  | 1.2 | 0.4 | 1.1 | 0.87184 | 2100.4 | 19.0 | 2102.9 | 10.8 | 2105.3 | 10.5 | 0.2  |
| Spot 215 | 1544768 | 1694810 | 143722.4  | 2.3 | 8.5 | 0.7 | 5.6  | 1.1 | 0.3 | 0.9 | 0.76738 | 1921.9 | 14.4 | 1910.5 | 9.7  | 1898.1 | 13.0 | -1.3 |
| Spot 216 | 2705469 | 2968249 | 89146.6   | 3.1 | 7.4 | 0.5 | 7.1  | 1.0 | 0.4 | 0.9 | 0.84798 | 2121.6 | 15.8 | 2128.8 | 9.2  | 2135.8 | 9.6  | 0.7  |
| Spot 217 | 1227220 | 1346419 | 75828.2   | 3.3 | 5.4 | 0.6 | 13.5 | 1.1 | 0.5 | 0.9 | 0.85699 | 2740.5 | 20.8 | 2715.4 | 10.3 | 2696.7 | 9.3  | -1.6 |
| Spot 218 | 612893  | 672422  | 3539.7    | 1.4 | 4.7 | 1.2 | 15.2 | 1.6 | 0.5 | 1.0 | 0.63744 | 2749.5 | 22.9 | 2828.7 | 15.3 | 2885.5 | 20.1 | 4.7  |
| Spot 219 | 1568777 | 1721150 | 274380.4  | 2.9 | 5.4 | 0.5 | 13.2 | 1.0 | 0.5 | 0.9 | 0.86241 | 2711.7 | 20.0 | 2695.9 | 9.9  | 2684.0 | 8.8  | -1.0 |
| Spot 220 | 2872864 | 3151902 | 579608.4  | 1.9 | 7.7 | 0.7 | 6.7  | 1.1 | 0.4 | 0.8 | 0.77780 | 2062.5 | 14.8 | 2066.5 | 9.5  | 2070.5 | 11.9 | 0.4  |
| Spot 221 | 586707  | 643693  | 30785.8   | 3.9 | 7.6 | 0.7 | 7.1  | 1.2 | 0.4 | 1.0 | 0.79995 | 2173.0 | 18.2 | 2129.8 | 11.0 | 2088.3 | 13.0 | -4.1 |
| Spot 222 | 1249733 | 1371118 | 155916.4  | 2.7 | 7.6 | 0.6 | 7.0  | 1.1 | 0.4 | 1.0 | 0.83649 | 2130.6 | 17.4 | 2113.6 | 10.2 | 2097.0 | 11.1 | -1.6 |
| Spot 223 | 1013153 | 1111560 | 60480.0   | 1.1 | 7.4 | 0.8 | 7.5  | 1.3 | 0.4 | 1.0 | 0.79831 | 2179.6 | 19.3 | 2168.9 | 11.7 | 2158.7 | 13.8 | -1.0 |
| Spot 224 | 1040752 | 1141839 | 159720.2  | 1.5 | 7.5 | 0.6 | 7.1  | 1.3 | 0.4 | 1.2 | 0.90263 | 2118.6 | 21.8 | 2125.5 | 11.9 | 2132.2 | 10.1 | 0.6  |
| Spot 225 | 1864024 | 2045075 | 108286.5  | 3.7 | 7.5 | 0.6 | 7.4  | 1.2 | 0.4 | 1.0 | 0.87385 | 2201.9 | 19.1 | 2166.0 | 10.5 | 2132.1 | 10.0 | -3.3 |
| Spot 226 | 2532978 | 2779004 | 9252.5    | 2.6 | 5.1 | 0.8 | 12.4 | 1.5 | 0.5 | 1.3 | 0.86686 | 2470.6 | 26.8 | 2638.4 | 14.2 | 2769.8 | 12.3 | 10.8 |
| Spot 227 | 1409111 | 1545977 | 73783.2   | 1.9 | 8.5 | 0.7 | 5.5  | 1.2 | 0.3 | 1.0 | 0.83005 | 1878.4 | 16.1 | 1893.4 | 10.2 | 1909.7 | 11.9 | 1.6  |
| Spot 228 | 1406968 | 1543626 | 45933.3   | 1.4 | 8.4 | 0.6 | 5.6  | 0.9 | 0.3 | 0.7 | 0.78765 | 1905.7 | 11.7 | 1911.8 | 7.7  | 1918.3 | 9.9  | 0.7  |
| Spot 229 | 1746121 | 1915720 | 105842.4  | 3.4 | 7.8 | 0.6 | 6.8  | 1.1 | 0.4 | 0.9 | 0.82712 | 2118.9 | 15.7 | 2082.0 | 9.3  | 2045.7 | 10.5 | -3.6 |
| Spot 230 | 3106459 | 3408187 | 10229.2   | 8.0 | 6.6 | 1.1 | 8.0  | 1.5 | 0.4 | 0.9 | 0.64320 | 2129.5 | 17.1 | 2231.0 | 13.3 | 2325.5 | 19.3 | 8.4  |
| Spot 231 | 2376053 | 2606836 | 118675.7  | 2.8 | 5.4 | 0.6 | 13.3 | 1.1 | 0.5 | 1.0 | 0.85127 | 2729.3 | 21.7 | 2699.8 | 10.8 | 2677.7 | 9.9  | -1.9 |
| Spot 232 | 762091  | 836112  | 75338.8   | 1.7 | 8.4 | 0.6 | 5.7  | 1.2 | 0.4 | 1.1 | 0.86039 | 1934.9 | 18.0 | 1925.6 | 10.8 | 1915.7 | 11.4 | -1.0 |
| Spot 233 | 2341270 | 2568676 | 108399.3  | 2.3 | 5.4 | 0.6 | 12.8 | 1.0 | 0.5 | 0.8 | 0.79444 | 2640.9 | 17.9 | 2668.4 | 9.8  | 2689.3 | 10.4 | 1.8  |
| Spot 234 | 2731621 | 2996941 | 140635.3  | 2.1 | 8.5 | 0.6 | 5.6  | 1.0 | 0.3 | 0.8 | 0.80687 | 1908.3 | 13.3 | 1909.7 | 8.6  | 1911.1 | 10.6 | 0.1  |
| Spot 235 | 832233  | 913067  | 28714.0   | 0.8 | 5.4 | 0.6 | 12.9 | 1.1 | 0.5 | 1.0 | 0.87102 | 2660.5 | 21.4 | 2670.8 | 10.6 | 2678.5 | 9.2  | 0.7  |
| Spot 236 | 1574200 | 1727100 | 595303.8  | 1.9 | 8.6 | 0.7 | 5.5  | 1.0 | 0.3 | 0.8 | 0.76038 | 1913.6 | 12.9 | 1901.0 | 8.8  | 1887.3 | 12.0 | -1.4 |
| Spot 237 | 1374905 | 1508449 | 81300.6   | 2.8 | 5.4 | 0.5 | 13.1 | 0.9 | 0.5 | 0.8 | 0.81339 | 2675.8 | 16.6 | 2683.8 | 8.8  | 2689.9 | 8.9  | 0.5  |
| Spot 238 | 592739  | 650311  | 1489373.4 | 1.8 | 5.6 | 0.7 | 12.4 | 1.2 | 0.5 | 1.0 | 0.83436 | 2634.2 | 22.1 | 2634.2 | 11.5 | 2634.2 | 11.2 | 0.0  |
| Spot 239 | 910591  | 999036  | 119974.1  | 3.9 | 7.7 | 0.6 | 7.0  | 1.1 | 0.4 | 0.9 | 0.82422 | 2134.8 | 16.9 | 2107.0 | 10.0 | 2079.9 | 11.2 | -2.6 |
| Spot 240 | 1979110 | 2171339 | 89384.5   | 2.4 | 8.6 | 0.6 | 5.4  | 1.0 | 0.3 | 0.8 | 0.76512 | 1894.3 | 12.5 | 1892.7 | 8.5  | 1890.9 | 11.5 | -0.2 |
| Spot 241 | 1956605 | 2146649 | 13531.8   | 2.2 | 7.5 | 0.8 | 6.7  | 1.0 | 0.4 | 0.7 | 0.66695 | 2021.1 | 11.7 | 2072.4 | 8.9  | 2123.8 | 13.2 | 4.8  |
| Spot 242 | 2247413 | 2465702 | 123093.6  | 1.5 | 7.6 | 0.7 | 7.0  | 1.3 | 0.4 | 1.1 | 0.85259 | 2110.2 | 20.6 | 2109.3 | 12.0 | 2108.4 | 12.3 | -0.1 |
| Spot 243 | 3433614 | 3767117 | 27444.5   | 2.3 | 7.3 | 0.8 | 7.0  | 1.5 | 0.4 | 1.3 | 0.85708 | 2050.0 | 22.6 | 2113.9 | 13.3 | 2176.7 | 13.4 | 5.8  |
| Spot 244 | 1798128 | 1972779 | 209316.6  | 4.3 | 4.9 | 0.6 | 15.6 | 1.2 | 0.6 | 1.1 | 0.87890 | 2857.5 | 24.7 | 2854.9 | 11.6 | 2853.1 | 9.5  | -0.2 |
| Spot 245 | 804839  | 883012  | 107278.3  | 1.4 | 7.8 | 0.7 | 6.8  | 1.2 | 0.4 | 1.0 | 0.80621 | 2112.2 | 17.5 | 2080.5 | 10.7 | 2049.2 | 12.6 | -3.1 |
| Spot 246 | 622569  | 683039  | 136101.1  | 1.2 | 5.4 | 0.6 | 13.0 | 1.3 | 0.5 | 1.1 | 0.87635 | 2680.6 | 24.1 | 2679.3 | 11.8 | 2678.3 | 10.0 | -0.1 |
| Spot 247 | 1519929 | 1667559 | 141810.7  | 2.1 | 8.2 | 0.7 | 6.0  | 1.1 | 0.4 | 0.8 | 0.78094 | 1984.7 | 14.5 | 1979.1 | 9.5  | 1973.2 | 12.1 | -0.6 |
| Spot 248 | 1172772 | 1286682 | 59583.6   | 2.4 | 8.4 | 0.6 | 5.8  | 1.1 | 0.4 | 0.9 | 0.85351 | 1968.4 | 15.6 | 1941.2 | 9.3  | 1912.3 | 10.1 | -2.9 |
| Spot 249 | 2790878 | 3061953 | 159552.5  | 2.2 | 8.5 | 0.4 | 5.5  | 1.0 | 0.3 | 0.9 | 0.91339 | 1882.3 | 15.2 | 1895.6 | 8.8  | 1910.1 | 7.5  | 1.5  |
| Spot 250 | 1790531 | 1964443 | 415629.8  | 2.8 | 5.5 | 0.5 | 13.2 | 1.0 | 0.5 | 0.9 | 0.84568 | 2736.7 | 19.3 | 2697.4 | 9.7  | 2668.0 | 9.1  | -2.6 |
| Spot 251 | 1302066 | 1428534 | 21650.3   | 1.7 | 7.4 | 0.6 | 7.0  | 1.1 | 0.4 | 0.9 | 0.79733 | 2083.5 | 15.3 | 2113.5 | 9.6  | 2142.8 | 11.3 | 2.8  |
| Spot 252 | 1729109 | 1897056 | 548218.9  | 0.8 | 8.6 | 0.6 | 5.4  | 1.1 | 0.3 | 0.8 | 0.79343 | 1891.5 | 13.9 | 1885.1 | 9.1  | 1878.0 | 11.7 | -0.7 |
| Spot 253 | 3044449 | 3340153 | 248114.3  | 2.5 | 7.6 | 0.6 | 6.8  | 1.1 | 0.4 | 0.9 | 0.81514 | 2079.0 | 15.6 | 2090.8 | 9.5  | 2102.4 | 10.9 | 1.1  |
| Spot 254 | 301032  | 330271  | 166666.8  | 1.6 | 7.3 | 0.7 | 7.7  | 1.4 | 0.4 | 1.2 | 0.85690 | 2210.9 | 22.0 | 2191.7 | 12.3 | 2173.7 | 12.3 | -1.7 |
| Spot 255 | 1573460 | 1726288 | 210964.2  | 2.6 | 5.4 | 0.7 | 13.0 | 1.2 | 0.5 | 1.0 | 0.83191 | 2683.8 | 22.4 | 2677.4 | 11.6 | 2672.6 | 11.3 | -0.4 |
| Spot 256 | 1243912 | 1364732 | 119632.9  | 1.9 | 7.7 | 0.7 | 6.8  | 1.2 | 0.4 | 0.9 | 0.78521 | 2101.1 | 16.9 | 2087.9 | 10.6 | 2074.9 | 13.1 | -1.3 |

|          |         |         |           |     |     |     |      |     |     |     |         |        |      |        |      |        |      |      |
|----------|---------|---------|-----------|-----|-----|-----|------|-----|-----|-----|---------|--------|------|--------|------|--------|------|------|
| Spot 257 | 1570372 | 1722901 | 398883.2  | 1.3 | 3.9 | 0.6 | 23.2 | 1.0 | 0.7 | 0.8 | 0.79668 | 3247.5 | 20.6 | 3233.7 | 9.9  | 3225.1 | 9.7  | -0.7 |
| Spot 258 | 706042  | 774619  | 45444.9   | 1.2 | 8.1 | 0.6 | 6.0  | 0.9 | 0.4 | 0.7 | 0.75680 | 1976.7 | 11.8 | 1981.2 | 8.0  | 1985.9 | 10.7 | 0.5  |
| Spot 259 | 1879722 | 2062297 | 645584.4  | 2.3 | 5.4 | 0.5 | 13.1 | 1.1 | 0.5 | 1.0 | 0.89249 | 2709.0 | 21.8 | 2689.1 | 10.4 | 2674.1 | 8.2  | -1.3 |
| Spot 260 | 1498733 | 1644304 | 1633833.2 | 2.4 | 5.6 | 0.7 | 12.6 | 1.1 | 0.5 | 0.8 | 0.78638 | 2702.8 | 18.7 | 2653.7 | 10.1 | 2616.5 | 11.1 | -3.3 |
| Spot 261 | 1869511 | 2051094 | 285633.7  | 2.3 | 7.5 | 0.7 | 7.2  | 1.2 | 0.4 | 1.0 | 0.84077 | 2150.0 | 18.7 | 2130.8 | 10.8 | 2112.4 | 11.5 | -1.8 |
| Spot 262 | 2124097 | 2330408 | 330629.6  | 2.1 | 5.4 | 0.7 | 13.0 | 1.4 | 0.5 | 1.3 | 0.88337 | 2680.6 | 28.0 | 2679.8 | 13.6 | 2679.2 | 11.2 | -0.1 |
| Spot 263 | 864414  | 948373  | 20128.1   | 1.1 | 6.9 | 2.3 | 7.6  | 2.4 | 0.4 | 0.7 | 0.27884 | 2093.7 | 11.9 | 2183.0 | 21.4 | 2268.0 | 39.4 | 7.7  |
| Spot 264 | 1604356 | 1760186 | 116424.9  | 2.1 | 7.6 | 0.6 | 7.0  | 1.1 | 0.4 | 1.0 | 0.85650 | 2109.5 | 17.4 | 2107.7 | 10.0 | 2106.0 | 10.2 | -0.2 |
| Spot 265 | 1907088 | 2092321 | 224002.9  | 1.7 | 5.3 | 0.6 | 13.5 | 1.1 | 0.5 | 0.9 | 0.83731 | 2731.2 | 19.8 | 2713.1 | 10.0 | 2699.6 | 9.6  | -1.2 |
| Spot 266 | 2706475 | 2969353 | 634340.6  | 3.0 | 7.6 | 0.6 | 6.8  | 1.1 | 0.4 | 0.9 | 0.83734 | 2068.0 | 15.7 | 2080.3 | 9.4  | 2092.6 | 10.2 | 1.2  |
| Spot 267 | 1308596 | 1435698 | 119735.2  | 2.5 | 5.4 | 0.6 | 13.2 | 1.1 | 0.5 | 1.0 | 0.86354 | 2710.2 | 21.5 | 2693.5 | 10.6 | 2680.9 | 9.4  | -1.1 |
| Spot 268 | 1252620 | 1374285 | 102456.7  | 2.3 | 5.4 | 0.4 | 13.4 | 0.9 | 0.5 | 0.8 | 0.87097 | 2745.5 | 17.0 | 2705.8 | 8.2  | 2676.3 | 7.1  | -2.6 |
| Spot 269 | 1815563 | 1991907 | 86313.9   | 1.6 | 7.1 | 0.6 | 7.7  | 1.0 | 0.4 | 0.8 | 0.82360 | 2172.9 | 15.6 | 2191.8 | 9.2  | 2209.5 | 10.1 | 1.7  |
| Spot 270 | 2018835 | 2214922 | 150568.0  | 2.1 | 8.6 | 0.5 | 5.5  | 1.1 | 0.3 | 1.0 | 0.90469 | 1924.5 | 16.8 | 1903.8 | 9.6  | 1881.3 | 8.6  | -2.3 |
| Spot 271 | 707062  | 775738  | 20135.8   | 2.5 | 8.1 | 1.0 | 6.1  | 1.5 | 0.4 | 1.2 | 0.76077 | 1987.4 | 19.7 | 1988.2 | 13.2 | 1989.0 | 17.5 | 0.1  |
| Spot 272 | 674179  | 739661  | 57811.8   | 2.9 | 7.7 | 0.6 | 7.1  | 1.2 | 0.4 | 1.0 | 0.85079 | 2160.5 | 18.4 | 2120.6 | 10.5 | 2082.1 | 10.9 | -3.8 |
| Spot 273 | 1191702 | 1307450 | 171000.5  | 1.2 | 8.0 | 0.8 | 6.2  | 1.1 | 0.4 | 0.7 | 0.67050 | 2016.0 | 12.6 | 2008.0 | 9.5  | 1999.8 | 14.4 | -0.8 |
| Spot 274 | 2362765 | 2592258 | 248359.6  | 5.4 | 7.4 | 0.5 | 7.3  | 0.9 | 0.4 | 0.8 | 0.84027 | 2164.1 | 14.4 | 2150.0 | 8.3  | 2136.6 | 8.8  | -1.3 |
| Spot 275 | 1221596 | 1340249 | 211012.4  | 2.8 | 7.6 | 0.6 | 7.0  | 1.1 | 0.4 | 0.9 | 0.82542 | 2119.5 | 15.8 | 2107.1 | 9.4  | 2095.1 | 10.5 | -1.2 |
| Spot 276 | 845507  | 927631  | 5479.2    | 0.8 | 6.8 | 1.0 | 6.9  | 1.3 | 0.4 | 0.8 | 0.61045 | 1947.9 | 13.3 | 2103.1 | 11.5 | 2258.6 | 17.7 | 13.8 |
| Spot 277 | 938351  | 1029492 | 54840.9   | 2.1 | 7.2 | 1.0 | 7.9  | 1.4 | 0.4 | 1.0 | 0.73220 | 2247.4 | 19.6 | 2221.3 | 12.7 | 2197.3 | 16.7 | -2.3 |
| Spot 278 | 873829  | 958703  | 92384.0   | 2.4 | 7.2 | 0.6 | 8.1  | 1.2 | 0.4 | 1.1 | 0.86273 | 2291.7 | 20.6 | 2242.0 | 11.2 | 2196.9 | 10.9 | -4.3 |
| Spot 279 | 956801  | 1049734 | 1215876.4 | 2.3 | 7.6 | 0.5 | 7.0  | 1.1 | 0.4 | 0.9 | 0.86683 | 2126.3 | 16.9 | 2111.0 | 9.6  | 2096.1 | 9.4  | -1.4 |
| Spot 280 | 811901  | 890760  | 71681.6   | 2.3 | 7.6 | 0.7 | 7.0  | 1.2 | 0.4 | 1.0 | 0.83155 | 2107.0 | 18.2 | 2107.4 | 10.8 | 2107.7 | 11.9 | 0.0  |
| Spot 281 | 688848  | 755755  | 104447.9  | 2.6 | 7.2 | 0.8 | 7.5  | 1.2 | 0.4 | 0.9 | 0.77975 | 2145.2 | 17.0 | 2173.1 | 10.7 | 2199.6 | 13.0 | 2.5  |
| Spot 282 | 1484155 | 1628310 | 93348.3   | 1.7 | 8.5 | 0.5 | 5.5  | 1.0 | 0.3 | 0.8 | 0.85625 | 1903.1 | 13.4 | 1902.9 | 8.2  | 1902.6 | 8.8  | 0.0  |
| Spot 283 | 1808243 | 1983876 | 387402.8  | 2.5 | 5.5 | 0.6 | 12.8 | 1.0 | 0.5 | 0.8 | 0.83746 | 2670.5 | 18.5 | 2667.9 | 9.5  | 2665.9 | 9.1  | -0.2 |
| Spot 284 | 2684574 | 2945324 | 445836.5  | 2.6 | 7.8 | 0.6 | 6.8  | 1.1 | 0.4 | 0.9 | 0.83607 | 2117.1 | 16.1 | 2090.0 | 9.5  | 2063.4 | 10.3 | -2.6 |
| Spot 285 | 1444663 | 1584982 | 745362.6  | 2.3 | 4.1 | 0.5 | 21.3 | 1.0 | 0.6 | 0.8 | 0.84041 | 3165.0 | 20.5 | 3150.1 | 9.5  | 3140.7 | 8.4  | -0.8 |
| Spot 286 | 1431704 | 1570764 | 126895.5  | 2.0 | 8.6 | 0.6 | 5.5  | 1.2 | 0.3 | 1.0 | 0.85649 | 1906.8 | 16.4 | 1894.2 | 9.9  | 1880.3 | 10.8 | -1.4 |
| Spot 287 | 1726282 | 1893955 | 427648.3  | 1.9 | 4.1 | 0.3 | 21.6 | 0.9 | 0.7 | 0.8 | 0.91896 | 3232.2 | 19.9 | 3164.9 | 8.3  | 3122.4 | 5.3  | -3.5 |
| Spot 288 | 2086495 | 2289155 | 123783.9  | 2.6 | 8.5 | 0.6 | 5.5  | 1.0 | 0.3 | 0.8 | 0.79297 | 1897.5 | 13.6 | 1896.8 | 9.0  | 1896.0 | 11.5 | -0.1 |
| Spot 289 | 1387930 | 1522738 | 51736.3   | 1.7 | 8.3 | 0.6 | 5.5  | 1.3 | 0.3 | 1.1 | 0.85853 | 1875.0 | 17.6 | 1905.8 | 10.8 | 1939.5 | 11.5 | 3.3  |
| Spot 291 | 880873  | 966431  | 282348.0  | 1.7 | 8.5 | 0.8 | 5.7  | 1.2 | 0.4 | 1.0 | 0.78440 | 1941.1 | 16.2 | 1923.9 | 10.6 | 1905.4 | 13.7 | -1.9 |
| Spot 292 | 1529522 | 1678083 | 93190.3   | 2.6 | 5.4 | 0.6 | 13.0 | 1.3 | 0.5 | 1.1 | 0.88128 | 2676.3 | 24.2 | 2681.7 | 11.8 | 2685.7 | 9.8  | 0.4  |
| Spot 293 | 1459593 | 1601362 | 623967.3  | 3.1 | 7.6 | 0.6 | 7.0  | 1.1 | 0.4 | 0.9 | 0.84252 | 2115.3 | 16.4 | 2109.5 | 9.6  | 2103.9 | 10.2 | -0.5 |
| Spot 294 | 1483389 | 1627469 | 23352.5   | 0.9 | 8.2 | 0.5 | 5.6  | 0.8 | 0.3 | 0.7 | 0.77990 | 1883.5 | 10.7 | 1917.1 | 7.3  | 1953.6 | 9.4  | 3.6  |
| Spot 295 | 1630585 | 1788962 | 39092.8   | 2.0 | 8.5 | 0.4 | 5.5  | 0.7 | 0.3 | 0.6 | 0.83578 | 1914.0 | 10.4 | 1904.8 | 6.4  | 1894.8 | 7.4  | -1.0 |
| Spot 296 | 1100833 | 1207756 | 15397.6   | 2.8 | 5.2 | 0.6 | 14.1 | 0.9 | 0.5 | 0.7 | 0.79514 | 2781.7 | 16.9 | 2759.5 | 8.9  | 2743.4 | 9.4  | -1.4 |
| Spot 297 | 1231414 | 1351020 | 93509.7   | 2.6 | 7.5 | 0.7 | 7.2  | 1.4 | 0.4 | 1.2 | 0.84673 | 2153.2 | 21.2 | 2130.8 | 12.2 | 2109.3 | 12.8 | -2.1 |
| Spot 298 | 2341604 | 2569042 | 570803.6  | 1.3 | 4.2 | 0.6 | 20.2 | 1.1 | 0.6 | 0.9 | 0.86127 | 3125.0 | 23.5 | 3102.3 | 10.7 | 3087.6 | 8.9  | -1.2 |
| Spot 299 | 878504  | 963832  | 53038.0   | 2.8 | 7.6 | 0.7 | 7.0  | 1.1 | 0.4 | 0.8 | 0.74000 | 2119.6 | 14.4 | 2107.0 | 9.6  | 2094.6 | 12.7 | -1.2 |
| Spot 300 | 1790088 | 1963957 | 58064.5   | 2.9 | 7.3 | 0.6 | 7.4  | 1.0 | 0.4 | 0.9 | 0.82718 | 2173.3 | 15.7 | 2163.1 | 9.2  | 2153.5 | 10.1 | -0.9 |

|                           |         |         |           |     |     |     |      |     |     |     |         |        |      |        |      |        |      |      |
|---------------------------|---------|---------|-----------|-----|-----|-----|------|-----|-----|-----|---------|--------|------|--------|------|--------|------|------|
| Spot 301                  | 804027  | 882121  | 349684.6  | 2.0 | 7.2 | 0.6 | 7.6  | 1.3 | 0.4 | 1.1 | 0.86611 | 2190.6 | 20.7 | 2184.6 | 11.5 | 2178.9 | 11.2 | -0.5 |
| Spot 302                  | 938689  | 1029863 | 10073.1   | 1.8 | 6.8 | 1.3 | 7.8  | 1.5 | 0.4 | 0.7 | 0.45864 | 2156.5 | 12.2 | 2210.8 | 13.1 | 2261.5 | 22.3 | 4.6  |
| Spot 303                  | 977532  | 1072479 | 44499.2   | 1.0 | 7.4 | 0.8 | 7.6  | 1.3 | 0.4 | 1.0 | 0.78632 | 2228.4 | 18.7 | 2180.8 | 11.3 | 2136.4 | 13.6 | -4.3 |
| Spot 304                  | 1831025 | 2008871 | 90878.4   | 2.3 | 5.5 | 0.8 | 12.4 | 1.3 | 0.5 | 1.0 | 0.77188 | 2624.7 | 20.8 | 2633.2 | 11.8 | 2639.6 | 13.2 | 0.6  |
| Spot 305                  | 906562  | 994616  | 1087638.6 | 1.9 | 7.7 | 0.7 | 6.9  | 1.0 | 0.4 | 0.8 | 0.74553 | 2126.0 | 14.0 | 2098.4 | 9.2  | 2071.4 | 12.2 | -2.6 |
| Spot 306                  | 1756508 | 1927116 | 546324.6  | 2.8 | 8.6 | 0.5 | 5.6  | 1.0 | 0.4 | 0.8 | 0.84593 | 1937.6 | 14.1 | 1910.4 | 8.5  | 1881.0 | 9.5  | -3.0 |
| Spot 307                  | 1171797 | 1285612 | 2730034.7 | 2.2 | 7.6 | 0.6 | 7.1  | 1.1 | 0.4 | 0.9 | 0.82872 | 2157.5 | 17.4 | 2120.4 | 10.2 | 2084.5 | 11.3 | -3.5 |
| Spot 308                  | 1893977 | 2077937 | 66840.3   | 1.4 | 6.8 | 0.7 | 8.5  | 1.4 | 0.4 | 1.2 | 0.86829 | 2275.7 | 23.6 | 2282.4 | 12.9 | 2288.5 | 12.1 | 0.6  |
| Spot 309                  | 528134  | 579431  | 26651.0   | 2.0 | 6.7 | 1.8 | 8.3  | 2.1 | 0.4 | 1.0 | 0.50081 | 2206.7 | 19.4 | 2262.0 | 18.8 | 2312.4 | 30.8 | 4.6  |
| Spot 310                  | 555504  | 609460  | 138489.9  | 2.4 | 7.1 | 0.7 | 8.1  | 1.4 | 0.4 | 1.2 | 0.85224 | 2287.8 | 23.0 | 2244.0 | 12.7 | 2204.2 | 12.8 | -3.8 |
| Spot 311                  | 1571534 | 1724176 | 127463.0  | 1.1 | 7.9 | 0.6 | 6.5  | 1.2 | 0.4 | 1.1 | 0.87874 | 2053.5 | 19.1 | 2042.3 | 10.9 | 2030.9 | 10.4 | -1.1 |
| Spot 312                  | 2341799 | 2569256 | 33916.5   | 1.5 | 8.2 | 0.5 | 5.5  | 1.0 | 0.3 | 0.9 | 0.86401 | 1843.2 | 14.1 | 1897.7 | 8.7  | 1957.8 | 9.2  | 5.9  |
| Spot 313                  | 1659005 | 1820142 | 69530.4   | 2.5 | 5.1 | 0.6 | 14.4 | 1.0 | 0.5 | 0.8 | 0.82695 | 2775.0 | 18.9 | 2773.2 | 9.6  | 2771.9 | 9.4  | -0.1 |
| Spot 314                  | 2144383 | 2352665 | 102764.3  | 4.7 | 7.3 | 0.6 | 7.6  | 1.0 | 0.4 | 0.8 | 0.81885 | 2200.7 | 14.8 | 2186.1 | 8.7  | 2172.3 | 9.7  | -1.3 |
| Spot 315                  | 2022856 | 2219334 | 55917.5   | 2.5 | 8.5 | 0.5 | 5.5  | 0.8 | 0.3 | 0.7 | 0.81175 | 1921.3 | 11.4 | 1906.0 | 7.3  | 1889.3 | 8.9  | -1.7 |
| <b>Run 1 (discordant)</b> |         |         |           |     |     |     |      |     |     |     |         |        |      |        |      |        |      |      |
| Spot 11                   | 886085  | 972150  | 91490.3   | 4.2 | 7.5 | 0.8 | 7.8  | 1.2 | 0.4 | 0.9 | 0.75436 | 2266.1 | 17.2 | 2204.6 | 10.7 | 2147.8 | 13.7 | -5.5 |
| Spot 20                   | 1458949 | 1600656 | 78127.7   | 2.0 | 7.7 | 0.5 | 7.3  | 0.9 | 0.4 | 0.7 | 0.80372 | 2198.9 | 13.4 | 2145.0 | 8.0  | 2093.7 | 9.4  | -5.0 |
| Spot 290                  | 461315  | 506122  | 34915.6   | 2.4 | 8.8 | 0.8 | 5.7  | 1.3 | 0.4 | 1.0 | 0.79035 | 1998.6 | 17.9 | 1931.0 | 11.4 | 1859.1 | 14.6 | -7.5 |
| Spot 41                   | 888001  | 974252  | 112086.1  | 2.6 | 8.8 | 0.6 | 5.6  | 1.0 | 0.4 | 0.8 | 0.77982 | 1960.5 | 13.6 | 1915.2 | 8.9  | 1866.4 | 11.7 | -5.0 |
| <b>Run 2</b>              |         |         |           |     |     |     |      |     |     |     |         |        |      |        |      |        |      |      |
| Spot 1                    | 2582385 | 2598204 | 115833.2  | 1.5 | 8.4 | 0.6 | 5.6  | 1.3 | 0.3 | 1.1 | 0.87690 | 1906.2 | 18.7 | 1910.1 | 11.1 | 1914.3 | 11.1 | 0.4  |
| Spot 2                    | 1410269 | 1418908 | 56335.3   | 2.7 | 5.4 | 0.5 | 13.5 | 1.2 | 0.5 | 1.1 | 0.90729 | 2767.9 | 25.0 | 2713.8 | 11.6 | 2673.8 | 8.5  | -3.5 |
| Spot 3                    | 3011890 | 3030340 | 68211.0   | 1.6 | 8.5 | 0.7 | 5.5  | 1.7 | 0.3 | 1.5 | 0.91304 | 1908.2 | 25.1 | 1904.7 | 14.3 | 1901.0 | 12.2 | -0.4 |
| Spot 5                    | 1458657 | 1467592 | 17602.8   | 2.3 | 7.4 | 0.4 | 7.4  | 0.7 | 0.4 | 0.6 | 0.82779 | 2171.4 | 11.2 | 2159.7 | 6.6  | 2148.6 | 7.2  | -1.1 |
| Spot 6                    | 1446005 | 1454862 | 1222578.3 | 2.9 | 5.5 | 0.6 | 13.4 | 1.3 | 0.5 | 1.2 | 0.88789 | 2769.6 | 26.5 | 2710.2 | 12.5 | 2666.2 | 10.1 | -3.9 |
| Spot 7                    | 1654102 | 1664235 | 37800.9   | 1.8 | 5.6 | 0.6 | 11.6 | 1.2 | 0.5 | 1.0 | 0.86550 | 2523.8 | 21.8 | 2570.0 | 11.3 | 2606.7 | 10.1 | 3.2  |
| Spot 8                    | 1668375 | 1678595 | 44614.7   | 2.3 | 8.3 | 0.6 | 4.9  | 1.1 | 0.3 | 0.9 | 0.82717 | 1675.8 | 13.5 | 1798.1 | 9.3  | 1943.1 | 11.1 | 13.8 |
| Spot 9                    | 1581809 | 1591499 | 122205.7  | 2.4 | 8.4 | 0.7 | 5.7  | 1.2 | 0.3 | 1.0 | 0.82287 | 1919.9 | 16.5 | 1923.8 | 10.4 | 1928.1 | 12.3 | 0.4  |
| Spot 10                   | 1288935 | 1296831 | 15702.8   | 1.6 | 7.7 | 0.7 | 6.4  | 1.0 | 0.4 | 0.7 | 0.71187 | 1990.6 | 12.4 | 2036.1 | 8.9  | 2082.5 | 12.6 | 4.4  |
| Spot 11                   | 2006378 | 2018668 | 14728.3   | 1.8 | 5.2 | 0.4 | 13.6 | 0.9 | 0.5 | 0.8 | 0.87674 | 2690.8 | 16.7 | 2722.3 | 8.2  | 2745.7 | 6.9  | 2.0  |
| Spot 12                   | 1338023 | 1346219 | 190142.2  | 2.2 | 8.5 | 0.7 | 5.7  | 1.2 | 0.4 | 0.9 | 0.78387 | 1953.0 | 15.9 | 1928.1 | 10.4 | 1901.5 | 13.4 | -2.7 |
| Spot 13                   | 1159205 | 1166306 | 115907.2  | 3.3 | 7.6 | 0.8 | 7.2  | 1.1 | 0.4 | 0.8 | 0.70528 | 2168.7 | 14.7 | 2140.9 | 10.1 | 2114.2 | 14.1 | -2.6 |
| Spot 14                   | 1808031 | 1819107 | 184651.4  | 2.3 | 7.4 | 0.7 | 7.2  | 1.2 | 0.4 | 0.9 | 0.80967 | 2134.6 | 17.0 | 2139.3 | 10.3 | 2143.9 | 11.9 | 0.4  |
| Spot 15                   | 1062710 | 1069219 | 151211.4  | 1.3 | 7.3 | 0.6 | 7.7  | 1.1 | 0.4 | 0.9 | 0.82768 | 2205.7 | 17.5 | 2191.5 | 10.1 | 2178.2 | 11.0 | -1.3 |
| Spot 16                   | 509680  | 512802  | 1993352.2 | 2.5 | 5.3 | 0.7 | 13.0 | 1.1 | 0.5 | 0.8 | 0.76441 | 2625.3 | 18.0 | 2679.2 | 10.3 | 2720.2 | 11.6 | 3.5  |
| Spot 17                   | 2342483 | 2356833 | 23012.8   | 1.7 | 8.1 | 0.9 | 5.7  | 1.4 | 0.3 | 1.1 | 0.78049 | 1873.7 | 17.8 | 1931.0 | 12.1 | 1993.2 | 15.6 | 6.0  |
| Spot 18                   | 1982095 | 1994236 | 88996.3   | 0.9 | 7.7 | 0.5 | 6.8  | 1.0 | 0.4 | 0.8 | 0.84241 | 2082.9 | 14.7 | 2084.5 | 8.7  | 2086.0 | 9.3  | 0.1  |
| Spot 19                   | 2016599 | 2028953 | 44186.3   | 2.4 | 8.2 | 0.7 | 5.6  | 1.1 | 0.3 | 0.9 | 0.78454 | 1889.6 | 14.2 | 1922.1 | 9.5  | 1957.3 | 12.2 | 3.5  |
| Spot 20                   | 1285807 | 1293684 | 179624.3  | 2.8 | 5.4 | 0.6 | 13.2 | 0.9 | 0.5 | 0.7 | 0.78328 | 2693.7 | 16.0 | 2693.2 | 8.8  | 2692.8 | 9.5  | 0.0  |
| Spot 21                   | 855819  | 861061  | 22835.7   | 2.1 | 5.5 | 0.6 | 12.8 | 1.0 | 0.5 | 0.8 | 0.82776 | 2681.2 | 17.9 | 2667.6 | 9.3  | 2657.4 | 9.2  | -0.9 |
| Spot 22                   | 1472969 | 1481992 | 18540.2   | 1.1 | 8.1 | 1.1 | 5.3  | 1.4 | 0.3 | 0.8 | 0.56034 | 1788.6 | 12.1 | 1874.7 | 11.8 | 1971.5 | 20.4 | 9.3  |
| Spot 23                   | 1654324 | 1664458 | 21713.3   | 3.3 | 7.2 | 0.6 | 7.4  | 1.1 | 0.4 | 0.9 | 0.84557 | 2126.7 | 16.3 | 2163.2 | 9.5  | 2197.9 | 9.9  | 3.2  |

|         |         |         |           |     |     |     |      |     |     |     |         |        |      |        |      |        |      |      |
|---------|---------|---------|-----------|-----|-----|-----|------|-----|-----|-----|---------|--------|------|--------|------|--------|------|------|
| Spot 24 | 1662661 | 1672846 | 69578.7   | 2.7 | 8.4 | 0.7 | 5.6  | 1.1 | 0.3 | 0.9 | 0.78281 | 1907.7 | 14.5 | 1915.4 | 9.7  | 1923.7 | 12.5 | 0.8  |
| Spot 26 | 2122622 | 2135624 | 9603.0    | 2.0 | 6.3 | 1.5 | 9.1  | 1.8 | 0.4 | 1.0 | 0.56415 | 2283.4 | 19.3 | 2352.8 | 16.3 | 2413.6 | 25.0 | 5.4  |
| Spot 27 | 1942342 | 1954240 | 20460.8   | 1.9 | 8.1 | 0.8 | 5.9  | 1.1 | 0.3 | 0.7 | 0.67096 | 1922.8 | 11.9 | 1955.6 | 9.3  | 1990.6 | 14.1 | 3.4  |
| Spot 28 | 3053581 | 3072287 | 94904.0   | 2.6 | 7.1 | 0.7 | 7.8  | 1.3 | 0.4 | 1.2 | 0.86219 | 2197.2 | 21.5 | 2206.9 | 12.0 | 2215.9 | 11.8 | 0.8  |
| Spot 29 | 2092932 | 2105752 | 50944.2   | 2.2 | 8.4 | 0.6 | 5.6  | 1.2 | 0.3 | 1.0 | 0.83013 | 1908.8 | 16.0 | 1911.6 | 10.0 | 1914.6 | 11.7 | 0.3  |
| Spot 30 | 2170889 | 2184187 | 596954.4  | 2.0 | 7.2 | 0.5 | 7.8  | 1.0 | 0.4 | 0.9 | 0.84496 | 2217.6 | 16.0 | 2208.5 | 9.1  | 2200.2 | 9.4  | -0.8 |
| Spot 31 | 2178561 | 2191906 | 20353.7   | 2.2 | 7.1 | 0.7 | 7.6  | 1.9 | 0.4 | 1.8 | 0.92523 | 2159.2 | 32.8 | 2184.0 | 17.3 | 2207.4 | 12.7 | 2.2  |
| Spot 32 | 1484601 | 1493695 | 64820.8   | 2.5 | 7.5 | 0.4 | 7.3  | 1.0 | 0.4 | 0.9 | 0.89378 | 2176.5 | 16.1 | 2150.3 | 8.7  | 2125.3 | 7.7  | -2.4 |
| Spot 34 | 1810937 | 1822030 | 30765.8   | 1.9 | 8.2 | 0.8 | 5.6  | 1.3 | 0.3 | 1.1 | 0.80416 | 1875.2 | 17.4 | 1921.6 | 11.5 | 1971.9 | 14.1 | 4.9  |
| Spot 35 | 1186655 | 1193924 | 121370.8  | 1.1 | 5.4 | 0.5 | 12.9 | 0.9 | 0.5 | 0.7 | 0.78849 | 2664.9 | 15.0 | 2675.1 | 8.2  | 2682.9 | 8.9  | 0.7  |
| Spot 36 | 1012919 | 1019124 | 120369.1  | 1.8 | 5.7 | 0.6 | 12.1 | 1.3 | 0.5 | 1.2 | 0.88350 | 2632.0 | 25.2 | 2612.7 | 12.4 | 2597.7 | 10.3 | -1.3 |
| Spot 37 | 1853958 | 1865315 | 170002.2  | 2.2 | 5.4 | 0.3 | 13.2 | 0.7 | 0.5 | 0.6 | 0.88204 | 2732.6 | 14.5 | 2696.7 | 7.0  | 2669.9 | 5.7  | -2.4 |
| Spot 38 | 912683  | 918274  | 111264.7  | 2.2 | 7.1 | 0.8 | 7.8  | 1.5 | 0.4 | 1.2 | 0.83401 | 2211.3 | 22.8 | 2210.1 | 13.1 | 2209.1 | 14.0 | -0.1 |
| Spot 39 | 1252382 | 1260054 | 97383.4   | 2.7 | 7.1 | 0.8 | 8.0  | 1.1 | 0.4 | 0.7 | 0.65888 | 2250.8 | 13.2 | 2232.1 | 9.5  | 2215.1 | 13.7 | -1.6 |
| Spot 40 | 2193242 | 2206677 | 39290.1   | 1.1 | 8.4 | 0.6 | 5.6  | 1.0 | 0.3 | 0.8 | 0.76466 | 1910.0 | 12.4 | 1912.0 | 8.5  | 1914.1 | 11.4 | 0.2  |
| Spot 42 | 2707827 | 2724415 | 97091.7   | 2.2 | 8.5 | 0.6 | 5.5  | 1.2 | 0.3 | 1.0 | 0.86934 | 1891.7 | 16.5 | 1895.6 | 9.9  | 1899.9 | 10.3 | 0.4  |
| Spot 43 | 1658789 | 1668951 | 58948.4   | 2.2 | 8.6 | 0.6 | 5.5  | 1.2 | 0.3 | 1.1 | 0.88037 | 1931.9 | 18.2 | 1903.2 | 10.6 | 1872.1 | 10.6 | -3.2 |
| Spot 44 | 1355615 | 1363919 | 1133305.5 | 2.2 | 8.4 | 0.5 | 5.7  | 1.1 | 0.4 | 1.0 | 0.91100 | 1956.9 | 16.9 | 1936.8 | 9.5  | 1915.3 | 8.2  | -2.2 |
| Spot 45 | 1348798 | 1357060 | 105735.8  | 2.1 | 7.6 | 0.5 | 7.2  | 1.1 | 0.4 | 1.0 | 0.88225 | 2161.3 | 18.1 | 2131.8 | 10.0 | 2103.5 | 9.3  | -2.7 |
| Spot 46 | 1381674 | 1390138 | 109310.5  | 2.6 | 5.4 | 0.6 | 13.2 | 1.2 | 0.5 | 1.1 | 0.87145 | 2711.9 | 23.3 | 2695.4 | 11.4 | 2682.9 | 9.8  | -1.1 |
| Spot 47 | 2369180 | 2383692 | 94988.5   | 1.5 | 7.2 | 0.6 | 7.7  | 1.0 | 0.4 | 0.9 | 0.84131 | 2202.8 | 16.2 | 2202.4 | 9.3  | 2201.9 | 9.7  | 0.0  |
| Spot 48 | 1651253 | 1661368 | 250557.6  | 2.5 | 5.5 | 0.6 | 13.3 | 0.9 | 0.5 | 0.7 | 0.80300 | 2743.0 | 16.8 | 2697.9 | 8.8  | 2664.3 | 9.2  | -3.0 |
| Spot 50 | 950327  | 956149  | 221999.8  | 1.7 | 6.9 | 0.8 | 8.3  | 1.5 | 0.4 | 1.3 | 0.84714 | 2270.3 | 24.7 | 2265.9 | 13.8 | 2261.8 | 14.0 | -0.4 |
| Spot 51 | 2021245 | 2033627 | 235994.3  | 3.1 | 6.2 | 0.4 | 10.4 | 1.1 | 0.5 | 1.0 | 0.91802 | 2500.6 | 21.0 | 2470.0 | 10.2 | 2444.8 | 7.4  | -2.3 |
| Spot 52 | 2284056 | 2298048 | 166780.1  | 3.6 | 8.5 | 0.7 | 5.4  | 1.3 | 0.3 | 1.1 | 0.85775 | 1871.1 | 17.9 | 1880.8 | 11.0 | 1891.5 | 11.9 | 1.1  |
| Spot 53 | 1661570 | 1671749 | 836543.2  | 2.6 | 8.5 | 0.7 | 5.4  | 1.2 | 0.3 | 1.0 | 0.83111 | 1893.4 | 16.3 | 1891.3 | 10.2 | 1888.9 | 11.9 | -0.2 |
| Spot 54 | 925715  | 931385  | 3154480.4 | 1.7 | 6.9 | 0.7 | 8.3  | 1.1 | 0.4 | 0.8 | 0.75049 | 2273.9 | 15.6 | 2264.7 | 9.8  | 2256.4 | 12.4 | -0.8 |
| Spot 55 | 1814875 | 1825992 | 1870801.7 | 0.9 | 7.3 | 0.6 | 7.4  | 1.1 | 0.4 | 0.9 | 0.81826 | 2160.6 | 16.4 | 2160.1 | 9.8  | 2159.7 | 11.0 | 0.0  |
| Spot 56 | 1645846 | 1655928 | 102978.4  | 1.5 | 7.2 | 0.7 | 7.7  | 1.2 | 0.4 | 0.9 | 0.78935 | 2209.5 | 17.1 | 2194.0 | 10.4 | 2179.5 | 12.4 | -1.4 |
| Spot 57 | 1989094 | 2001279 | 431116.9  | 2.5 | 8.4 | 0.6 | 5.7  | 1.4 | 0.4 | 1.2 | 0.89404 | 1935.5 | 20.3 | 1930.1 | 11.8 | 1924.3 | 10.9 | -0.6 |
| Spot 58 | 1248756 | 1256406 | 267616.0  | 3.1 | 5.5 | 0.5 | 12.8 | 0.9 | 0.5 | 0.7 | 0.80989 | 2669.4 | 16.3 | 2663.5 | 8.7  | 2659.0 | 9.0  | -0.4 |
| Spot 59 | 2072702 | 2085399 | 715187.0  | 2.6 | 4.6 | 0.7 | 16.9 | 1.2 | 0.6 | 1.0 | 0.82990 | 2930.7 | 23.0 | 2931.8 | 11.3 | 2932.6 | 10.6 | 0.1  |
| Spot 60 | 1308538 | 1316554 | 3754523.2 | 1.9 | 7.7 | 0.5 | 6.9  | 1.1 | 0.4 | 1.0 | 0.88258 | 2124.2 | 18.3 | 2103.0 | 10.2 | 2082.3 | 9.5  | -2.0 |
| Spot 61 | 1373586 | 1382001 | 71735.9   | 2.6 | 5.3 | 0.6 | 13.5 | 1.1 | 0.5 | 0.9 | 0.83614 | 2729.4 | 19.6 | 2717.0 | 10.0 | 2707.8 | 9.5  | -0.8 |
| Spot 62 | 1308221 | 1316235 | 114036.8  | 2.5 | 8.2 | 0.8 | 6.2  | 1.4 | 0.4 | 1.2 | 0.83945 | 2030.1 | 20.8 | 1998.3 | 12.4 | 1965.6 | 13.8 | -3.3 |
| Spot 63 | 1795862 | 1806863 | 55943.0   | 1.0 | 8.3 | 0.7 | 5.5  | 1.0 | 0.3 | 0.8 | 0.74757 | 1858.4 | 12.6 | 1897.4 | 8.9  | 1940.2 | 12.4 | 4.2  |
| Spot 64 | 1356560 | 1364870 | 48460.2   | 1.4 | 8.3 | 0.7 | 5.8  | 1.2 | 0.4 | 1.0 | 0.82605 | 1966.7 | 17.4 | 1952.0 | 10.8 | 1936.5 | 12.5 | -1.6 |
| Spot 65 | 1811212 | 1822307 | 240113.1  | 2.8 | 8.6 | 0.6 | 5.4  | 1.0 | 0.3 | 0.8 | 0.81490 | 1880.0 | 13.6 | 1881.1 | 8.7  | 1882.3 | 10.6 | 0.1  |
| Spot 66 | 1824960 | 1836139 | 58618.0   | 4.5 | 7.5 | 0.6 | 7.4  | 1.1 | 0.4 | 0.9 | 0.85037 | 2197.0 | 17.6 | 2159.3 | 9.9  | 2123.6 | 10.2 | -3.5 |
| Spot 67 | 2425866 | 2440726 | 13251.9   | 1.5 | 7.8 | 0.6 | 6.0  | 1.0 | 0.3 | 0.7 | 0.75798 | 1928.2 | 12.2 | 1975.8 | 8.4  | 2025.9 | 11.1 | 4.8  |
| Spot 68 | 1260240 | 1267960 | 50984.8   | 1.2 | 7.5 | 0.8 | 7.0  | 1.3 | 0.4 | 1.0 | 0.79527 | 2091.8 | 18.7 | 2105.7 | 11.7 | 2119.2 | 14.0 | 1.3  |
| Spot 69 | 1283318 | 1291180 | 1369321.2 | 2.4 | 7.7 | 0.6 | 6.9  | 1.2 | 0.4 | 1.1 | 0.86857 | 2125.9 | 19.5 | 2102.0 | 11.0 | 2078.6 | 10.8 | -2.3 |
| Spot 70 | 1449578 | 1458458 | 52259.8   | 2.2 | 8.5 | 0.6 | 5.5  | 1.1 | 0.3 | 1.0 | 0.82889 | 1905.5 | 15.7 | 1896.2 | 9.9  | 1886.1 | 11.6 | -1.0 |



|          |         |         |          |     |     |     |      |     |     |     |         |        |      |        |      |        |      |      |
|----------|---------|---------|----------|-----|-----|-----|------|-----|-----|-----|---------|--------|------|--------|------|--------|------|------|
| Spot 72  | 1952335 | 1964294 | 554826.9 | 1.5 | 4.2 | 0.5 | 20.5 | 1.1 | 0.6 | 0.9 | 0.86662 | 3127.3 | 23.2 | 3114.6 | 10.5 | 3106.4 | 8.6  | -0.7 |
| Spot 73  | 2203617 | 2217116 | 107599.4 | 2.4 | 8.4 | 0.6 | 5.6  | 1.2 | 0.3 | 1.1 | 0.87362 | 1915.1 | 17.8 | 1913.7 | 10.6 | 1912.1 | 10.7 | -0.2 |
| Spot 74  | 1636991 | 1647019 | 36094.7  | 1.5 | 8.4 | 0.5 | 5.8  | 1.0 | 0.4 | 0.8 | 0.83752 | 1964.9 | 13.9 | 1945.7 | 8.5  | 1925.3 | 9.6  | -2.1 |
| Spot 75  | 1597728 | 1607516 | 53566.6  | 2.9 | 7.1 | 0.5 | 7.9  | 1.1 | 0.4 | 1.0 | 0.88723 | 2243.7 | 18.9 | 2224.4 | 10.2 | 2206.6 | 9.0  | -1.7 |
| Spot 76  | 2654717 | 2670979 | 19254.4  | 3.8 | 8.0 | 0.6 | 5.8  | 1.0 | 0.3 | 0.8 | 0.78740 | 1911.7 | 13.2 | 1953.8 | 8.8  | 1998.7 | 11.1 | 4.4  |
| Spot 77  | 1577021 | 1586682 | 103553.5 | 1.2 | 7.4 | 0.7 | 7.4  | 1.2 | 0.4 | 1.0 | 0.82586 | 2170.5 | 17.7 | 2158.1 | 10.4 | 2146.3 | 11.5 | -1.1 |
| Spot 78  | 3754461 | 3777460 | 126722.9 | 3.1 | 7.4 | 0.4 | 7.1  | 0.9 | 0.4 | 0.8 | 0.90092 | 2122.0 | 14.2 | 2129.8 | 7.8  | 2137.3 | 6.6  | 0.7  |
| Spot 80  | 2174588 | 2187909 | 33709.2  | 2.4 | 5.5 | 0.5 | 12.5 | 1.1 | 0.5 | 1.0 | 0.91086 | 2622.2 | 21.9 | 2639.5 | 10.5 | 2652.8 | 7.6  | 1.2  |
| Spot 81  | 2569161 | 2584899 | 107177.0 | 2.5 | 8.5 | 0.5 | 5.5  | 1.0 | 0.3 | 0.8 | 0.83627 | 1901.8 | 13.4 | 1898.2 | 8.3  | 1894.2 | 9.6  | -0.4 |
| Spot 82  | 2139216 | 2152320 | 23287.2  | 1.3 | 8.2 | 1.0 | 5.7  | 1.3 | 0.3 | 0.9 | 0.69935 | 1888.8 | 15.4 | 1925.6 | 11.6 | 1965.4 | 17.2 | 3.9  |
| Spot 83  | 1226076 | 1233587 | 96689.6  | 2.1 | 8.5 | 0.7 | 5.6  | 1.1 | 0.4 | 0.8 | 0.72306 | 1949.0 | 12.9 | 1922.8 | 9.1  | 1894.5 | 13.2 | -2.9 |
| Spot 84  | 2472686 | 2487833 | 104338.2 | 2.0 | 7.4 | 0.6 | 7.3  | 1.0 | 0.4 | 0.9 | 0.83701 | 2171.1 | 15.7 | 2151.9 | 9.1  | 2133.6 | 9.7  | -1.8 |
| Spot 85  | 1465222 | 1474198 | 154720.7 | 0.9 | 5.2 | 0.6 | 13.7 | 1.0 | 0.5 | 0.8 | 0.76957 | 2736.0 | 16.9 | 2730.2 | 9.3  | 2725.9 | 10.4 | -0.4 |
| Spot 86  | 1269430 | 1277206 | 137528.0 | 2.0 | 7.5 | 0.7 | 7.2  | 1.1 | 0.4 | 0.9 | 0.79642 | 2152.8 | 15.8 | 2133.9 | 9.6  | 2115.8 | 11.5 | -1.7 |
| Spot 87  | 1412122 | 1420772 | 201202.6 | 1.9 | 8.6 | 0.6 | 5.4  | 1.2 | 0.3 | 1.0 | 0.85196 | 1891.5 | 16.2 | 1887.5 | 9.9  | 1883.0 | 10.9 | -0.5 |
| Spot 88  | 2052042 | 2064612 | 92438.5  | 2.3 | 8.5 | 0.5 | 5.5  | 1.1 | 0.3 | 0.9 | 0.86788 | 1896.3 | 15.4 | 1893.4 | 9.3  | 1890.2 | 9.7  | -0.3 |
| Spot 89  | 1483870 | 1492959 | 668086.7 | 2.4 | 5.6 | 0.6 | 12.3 | 1.1 | 0.5 | 0.9 | 0.83206 | 2628.0 | 20.5 | 2628.7 | 10.7 | 2629.3 | 10.5 | 0.0  |
| Spot 90  | 1409846 | 1418482 | 216451.9 | 0.9 | 7.6 | 0.7 | 7.1  | 1.2 | 0.4 | 1.0 | 0.81351 | 2152.2 | 17.9 | 2127.8 | 10.7 | 2104.2 | 12.2 | -2.3 |
| Spot 91  | 1759174 | 1769951 | 120036.7 | 2.5 | 7.2 | 0.4 | 7.8  | 0.7 | 0.4 | 0.5 | 0.79746 | 2217.5 | 10.1 | 2207.1 | 6.1  | 2197.5 | 7.1  | -0.9 |
| Spot 92  | 1432531 | 1441306 | 118644.2 | 2.9 | 7.5 | 0.6 | 7.2  | 1.0 | 0.4 | 0.8 | 0.76560 | 2141.9 | 14.0 | 2131.0 | 8.9  | 2120.5 | 11.3 | -1.0 |
| Spot 93  | 2555393 | 2571047 | 229277.5 | 1.9 | 8.0 | 0.7 | 6.0  | 1.2 | 0.4 | 1.0 | 0.84687 | 1962.9 | 17.7 | 1982.1 | 10.8 | 2002.1 | 11.7 | 2.0  |
| Spot 94  | 1617496 | 1627404 | 51994.4  | 2.3 | 8.4 | 0.6 | 5.7  | 1.0 | 0.3 | 0.9 | 0.82197 | 1930.0 | 14.3 | 1924.1 | 9.0  | 1917.8 | 10.7 | -0.6 |
| Spot 95  | 1210924 | 1218342 | 94143.8  | 2.8 | 8.5 | 0.7 | 5.5  | 1.2 | 0.3 | 1.0 | 0.83475 | 1914.6 | 17.2 | 1905.7 | 10.7 | 1895.9 | 12.3 | -1.0 |
| Spot 96  | 2130543 | 2143594 | 90538.7  | 3.6 | 7.2 | 0.5 | 7.8  | 1.0 | 0.4 | 0.8 | 0.83779 | 2232.8 | 15.6 | 2213.8 | 8.9  | 2196.2 | 9.4  | -1.7 |
| Spot 97  | 2394759 | 2409429 | 117874.8 | 3.0 | 8.6 | 0.5 | 5.7  | 1.2 | 0.4 | 1.1 | 0.89987 | 1961.9 | 18.7 | 1927.3 | 10.6 | 1890.1 | 9.6  | -3.8 |
| Spot 98  | 1882674 | 1894207 | 164648.1 | 2.5 | 7.4 | 0.6 | 7.4  | 1.2 | 0.4 | 1.0 | 0.83324 | 2169.4 | 18.0 | 2155.4 | 10.5 | 2142.0 | 11.3 | -1.3 |
| Spot 99  | 1052986 | 1059436 | 48182.5  | 1.9 | 8.3 | 0.6 | 5.8  | 0.9 | 0.4 | 0.7 | 0.77329 | 1944.9 | 12.3 | 1942.5 | 8.2  | 1940.0 | 10.7 | -0.3 |
| Spot 100 | 1953242 | 1965207 | 35729.2  | 2.0 | 8.3 | 0.6 | 5.6  | 1.0 | 0.3 | 0.9 | 0.83290 | 1895.9 | 14.0 | 1912.2 | 8.8  | 1929.8 | 10.2 | 1.8  |
| Spot 101 | 1494165 | 1503318 | 23713.2  | 2.2 | 8.0 | 0.8 | 6.0  | 1.1 | 0.4 | 0.8 | 0.72417 | 1963.9 | 13.8 | 1980.8 | 9.8  | 1998.5 | 13.8 | 1.7  |
| Spot 102 | 2118654 | 2131633 | 156717.0 | 2.5 | 7.7 | 0.6 | 6.8  | 1.2 | 0.4 | 1.1 | 0.86219 | 2095.1 | 19.1 | 2089.9 | 11.0 | 2084.7 | 11.0 | -0.5 |
| Spot 103 | 1830055 | 1841265 | 825751.1 | 2.0 | 7.6 | 0.7 | 7.1  | 1.1 | 0.4 | 0.8 | 0.73762 | 2138.5 | 14.6 | 2121.4 | 9.7  | 2104.9 | 12.9 | -1.6 |
| Spot 104 | 2376000 | 2390555 | 116959.8 | 2.5 | 5.4 | 0.5 | 12.9 | 1.1 | 0.5 | 1.0 | 0.89233 | 2676.8 | 22.4 | 2672.9 | 10.8 | 2670.0 | 8.6  | -0.3 |
| Spot 105 | 1569891 | 1579508 | 18530.4  | 3.3 | 5.4 | 0.7 | 12.8 | 1.2 | 0.5 | 1.0 | 0.80764 | 2669.0 | 22.0 | 2667.8 | 11.7 | 2666.8 | 12.2 | -0.1 |
| Spot 107 | 267442  | 269080  | 17247.6  | 3.0 | 7.4 | 1.0 | 7.4  | 1.5 | 0.4 | 1.1 | 0.75581 | 2185.2 | 21.2 | 2162.5 | 13.6 | 2141.0 | 17.3 | -2.1 |
| Spot 108 | 1551572 | 1561077 | 245022.8 | 2.5 | 5.4 | 0.6 | 13.4 | 1.1 | 0.5 | 0.9 | 0.82793 | 2743.3 | 19.9 | 2707.0 | 10.2 | 2679.9 | 10.0 | -2.4 |
| Spot 109 | 1442748 | 1451586 | 30837.0  | 1.5 | 7.2 | 0.6 | 7.7  | 1.0 | 0.4 | 0.8 | 0.79591 | 2194.3 | 14.6 | 2197.2 | 8.8  | 2200.0 | 10.4 | 0.3  |
| Spot 110 | 1997098 | 2009332 | 74510.3  | 2.4 | 8.5 | 0.6 | 5.5  | 1.0 | 0.3 | 0.8 | 0.82495 | 1921.3 | 13.5 | 1907.8 | 8.5  | 1893.1 | 10.0 | -1.5 |
| Spot 111 | 950864  | 956689  | 53873.0  | 1.2 | 8.3 | 0.6 | 5.8  | 1.1 | 0.4 | 0.9 | 0.82460 | 1956.4 | 15.9 | 1949.2 | 9.9  | 1941.6 | 11.5 | -0.8 |
| Spot 112 | 1650692 | 1660804 | 273112.6 | 1.5 | 8.2 | 0.7 | 6.0  | 1.2 | 0.4 | 1.0 | 0.81048 | 1985.2 | 16.8 | 1971.1 | 10.5 | 1956.3 | 12.7 | -1.5 |
| Spot 113 | 2062337 | 2074970 | 39060.5  | 2.3 | 8.1 | 0.8 | 6.1  | 1.3 | 0.4 | 1.1 | 0.81048 | 1991.7 | 18.3 | 1985.0 | 11.5 | 1978.0 | 13.7 | -0.7 |
| Spot 114 | 1584090 | 1593794 | 142675.8 | 2.1 | 5.5 | 0.5 | 12.9 | 0.9 | 0.5 | 0.7 | 0.82842 | 2696.3 | 16.2 | 2675.4 | 8.4  | 2659.7 | 8.2  | -1.4 |
| Spot 115 | 635140  | 639031  | 96388.3  | 1.3 | 4.4 | 0.5 | 18.5 | 1.2 | 0.6 | 1.1 | 0.89712 | 3029.1 | 26.2 | 3018.1 | 11.6 | 3010.7 | 8.6  | -0.6 |
| Spot 116 | 1601089 | 1610897 | 95327.8  | 1.8 | 5.5 | 0.6 | 12.7 | 1.0 | 0.5 | 0.8 | 0.81394 | 2664.9 | 17.1 | 2659.9 | 9.0  | 2656.0 | 9.3  | -0.3 |

|          |         |         |          |     |     |     |      |     |     |     |         |        |      |        |      |        |      |      |
|----------|---------|---------|----------|-----|-----|-----|------|-----|-----|-----|---------|--------|------|--------|------|--------|------|------|
| Spot 117 | 3060190 | 3078936 | 65174.4  | 1.6 | 5.4 | 0.4 | 12.7 | 1.0 | 0.5 | 0.9 | 0.91365 | 2627.4 | 19.4 | 2654.8 | 9.2  | 2675.8 | 6.6  | 1.8  |
| Spot 118 | 1456824 | 1465748 | 317389.8 | 2.4 | 5.4 | 0.6 | 12.8 | 1.2 | 0.5 | 1.0 | 0.87087 | 2659.4 | 22.5 | 2664.5 | 11.2 | 2668.4 | 9.6  | 0.3  |
| Spot 119 | 2313318 | 2327488 | 75365.5  | 2.2 | 5.5 | 0.6 | 12.5 | 1.0 | 0.5 | 0.8 | 0.81745 | 2631.8 | 17.9 | 2644.1 | 9.5  | 2653.5 | 9.7  | 0.8  |
| Spot 120 | 1823295 | 1834464 | 632519.9 | 2.1 | 8.4 | 0.6 | 5.7  | 1.1 | 0.4 | 0.9 | 0.83044 | 1951.8 | 14.8 | 1936.0 | 9.2  | 1919.2 | 10.6 | -1.7 |
| Spot 121 | 1055383 | 1061848 | 59527.5  | 1.1 | 8.1 | 0.7 | 6.4  | 1.3 | 0.4 | 1.1 | 0.85752 | 2071.3 | 20.0 | 2032.8 | 11.6 | 1993.9 | 12.1 | -3.9 |
| Spot 122 | 1479749 | 1488814 | 104639.6 | 6.0 | 3.7 | 0.6 | 24.9 | 1.1 | 0.7 | 1.0 | 0.85355 | 3361.2 | 25.3 | 3303.9 | 11.0 | 3269.3 | 9.3  | -2.8 |
| Spot 123 | 1817163 | 1828294 | 103716.3 | 2.0 | 8.5 | 0.6 | 5.4  | 1.2 | 0.3 | 1.1 | 0.87212 | 1884.1 | 17.6 | 1888.6 | 10.6 | 1893.7 | 10.9 | 0.5  |
| Spot 124 | 1491609 | 1500746 | 7206.1   | 1.5 | 7.4 | 1.3 | 6.5  | 1.5 | 0.4 | 0.7 | 0.48256 | 1958.5 | 11.9 | 2043.7 | 12.9 | 2130.9 | 22.4 | 8.1  |
| Spot 125 | 1904670 | 1916338 | 68957.0  | 2.5 | 7.3 | 0.7 | 7.5  | 1.3 | 0.4 | 1.2 | 0.85935 | 2174.8 | 21.3 | 2176.6 | 12.0 | 2178.3 | 11.9 | 0.2  |
| Spot 126 | 1125187 | 1132080 | 50764.1  | 1.9 | 7.2 | 0.7 | 7.7  | 1.0 | 0.4 | 0.7 | 0.70734 | 2195.8 | 13.3 | 2192.2 | 9.1  | 2188.7 | 12.4 | -0.3 |
| Spot 128 | 2886298 | 2903979 | 25540.5  | 2.3 | 7.3 | 0.6 | 6.9  | 1.0 | 0.4 | 0.8 | 0.81036 | 2047.5 | 14.4 | 2105.0 | 9.0  | 2161.7 | 10.3 | 5.3  |
| Spot 129 | 1494135 | 1503287 | 105979.4 | 2.2 | 7.4 | 0.6 | 7.3  | 1.1 | 0.4 | 0.9 | 0.83216 | 2163.2 | 16.2 | 2146.8 | 9.5  | 2131.2 | 10.3 | -1.5 |
| Spot 130 | 1626807 | 1636772 | 53027.7  | 3.3 | 7.6 | 0.6 | 7.1  | 0.9 | 0.4 | 0.7 | 0.74660 | 2135.1 | 12.1 | 2119.3 | 7.9  | 2104.1 | 10.4 | -1.5 |
| Spot 131 | 1193727 | 1201039 | 96514.4  | 2.6 | 5.4 | 0.7 | 13.3 | 1.1 | 0.5 | 0.9 | 0.79596 | 2723.2 | 19.7 | 2697.9 | 10.5 | 2679.1 | 11.1 | -1.6 |
| Spot 132 | 482167  | 485121  | 61704.2  | 3.0 | 6.9 | 0.7 | 8.3  | 1.5 | 0.4 | 1.3 | 0.87831 | 2281.0 | 25.5 | 2265.0 | 13.7 | 2250.5 | 12.5 | -1.4 |
| Spot 133 | 1309084 | 1317103 | 85905.4  | 0.5 | 5.4 | 0.6 | 13.0 | 1.2 | 0.5 | 1.0 | 0.86040 | 2663.0 | 21.7 | 2677.9 | 10.9 | 2689.2 | 9.7  | 1.0  |
| Spot 134 | 583610  | 587185  | 12042.8  | 3.3 | 6.7 | 0.8 | 8.3  | 1.1 | 0.4 | 0.8 | 0.68769 | 2233.6 | 14.5 | 2266.8 | 10.1 | 2296.9 | 13.9 | 2.8  |
| Spot 135 | 901740  | 907263  | 409674.6 | 2.2 | 5.4 | 0.6 | 13.7 | 1.1 | 0.5 | 0.9 | 0.81731 | 2804.4 | 20.2 | 2732.5 | 10.3 | 2679.8 | 10.4 | -4.6 |
| Spot 136 | 1867962 | 1879405 | 105419.1 | 1.1 | 8.5 | 0.4 | 5.3  | 0.9 | 0.3 | 0.8 | 0.88124 | 1857.8 | 12.4 | 1872.6 | 7.4  | 1889.1 | 7.4  | 1.7  |
| Spot 137 | 939383  | 945138  | 63575.7  | 4.3 | 7.4 | 0.6 | 7.4  | 1.4 | 0.4 | 1.2 | 0.89849 | 2177.6 | 22.8 | 2156.4 | 12.3 | 2136.2 | 10.5 | -1.9 |
| Spot 139 | 729322  | 733789  | 290285.6 | 2.2 | 7.9 | 0.6 | 6.5  | 1.2 | 0.4 | 1.0 | 0.84179 | 2072.5 | 17.7 | 2051.8 | 10.5 | 2031.1 | 11.3 | -2.0 |
| Spot 140 | 634072  | 637956  | 218637.2 | 2.5 | 6.9 | 0.5 | 8.5  | 1.1 | 0.4 | 0.9 | 0.86338 | 2302.8 | 17.9 | 2288.7 | 9.7  | 2276.1 | 9.3  | -1.2 |
| Spot 142 | 2035648 | 2048118 | 386328.5 | 2.6 | 5.4 | 0.5 | 13.1 | 1.0 | 0.5 | 0.9 | 0.86365 | 2712.8 | 20.0 | 2688.0 | 9.9  | 2669.4 | 8.7  | -1.6 |
| Spot 143 | 1792978 | 1803962 | 100195.8 | 3.0 | 5.5 | 0.5 | 12.9 | 1.0 | 0.5 | 0.9 | 0.87228 | 2697.1 | 20.1 | 2671.0 | 9.9  | 2651.4 | 8.5  | -1.7 |
| Spot 144 | 2366445 | 2380941 | 465660.7 | 2.5 | 4.9 | 0.5 | 15.4 | 1.2 | 0.6 | 1.0 | 0.88347 | 2838.3 | 23.6 | 2838.9 | 11.1 | 2839.3 | 8.9  | 0.0  |
| Spot 145 | 1888128 | 1899694 | 91858.9  | 1.6 | 8.7 | 0.8 | 5.4  | 1.3 | 0.3 | 1.0 | 0.79044 | 1914.5 | 17.0 | 1888.0 | 11.1 | 1859.0 | 14.3 | -3.0 |
| Spot 146 | 1666290 | 1676497 | 47065.3  | 3.3 | 5.4 | 0.6 | 13.3 | 1.1 | 0.5 | 0.9 | 0.81576 | 2717.1 | 19.8 | 2698.8 | 10.3 | 2685.1 | 10.4 | -1.2 |
| Spot 147 | 1661239 | 1671415 | 23692.6  | 1.7 | 8.1 | 1.0 | 5.7  | 1.5 | 0.3 | 1.1 | 0.75484 | 1887.0 | 18.0 | 1926.7 | 12.6 | 1969.6 | 17.1 | 4.2  |
| Spot 148 | 1970721 | 1982793 | 148299.1 | 2.2 | 8.4 | 0.7 | 5.6  | 1.1 | 0.3 | 0.9 | 0.78613 | 1932.5 | 14.9 | 1922.8 | 9.8  | 1912.2 | 12.6 | -1.1 |
| Spot 149 | 2701083 | 2717630 | 85482.0  | 2.5 | 8.4 | 0.7 | 5.6  | 1.2 | 0.3 | 1.0 | 0.82686 | 1910.6 | 16.7 | 1914.0 | 10.5 | 1917.8 | 12.4 | 0.4  |
| Spot 150 | 1169509 | 1176673 | 212578.0 | 2.0 | 4.6 | 0.7 | 17.3 | 1.3 | 0.6 | 1.1 | 0.84805 | 2986.8 | 25.7 | 2951.6 | 12.2 | 2927.8 | 10.9 | -2.0 |
| Spot 151 | 2231855 | 2245526 | 12377.0  | 2.0 | 7.8 | 0.7 | 6.2  | 1.0 | 0.4 | 0.8 | 0.75776 | 1991.4 | 13.4 | 2010.8 | 9.0  | 2030.7 | 11.9 | 1.9  |
| Spot 152 | 1340040 | 1348249 | 112663.9 | 1.5 | 7.4 | 0.4 | 7.5  | 0.7 | 0.4 | 0.6 | 0.82522 | 2191.4 | 10.9 | 2169.0 | 6.4  | 2147.8 | 7.0  | -2.0 |
| Spot 153 | 1304566 | 1312558 | 56550.8  | 2.4 | 5.4 | 0.5 | 12.7 | 0.9 | 0.5 | 0.7 | 0.81925 | 2639.4 | 15.2 | 2654.5 | 8.1  | 2666.0 | 8.1  | 1.0  |
| Spot 154 | 1469102 | 1478101 | 167698.9 | 2.6 | 5.4 | 0.6 | 13.0 | 1.1 | 0.5 | 1.0 | 0.85703 | 2677.9 | 20.9 | 2676.6 | 10.5 | 2675.5 | 9.5  | -0.1 |
| Spot 155 | 2949647 | 2967716 | 10827.8  | 1.5 | 7.6 | 1.3 | 5.8  | 1.8 | 0.3 | 1.2 | 0.67726 | 1826.3 | 19.0 | 1950.3 | 15.2 | 2084.7 | 22.8 | 12.4 |
| Spot 156 | 247431  | 248947  | 21666.9  | 3.2 | 7.0 | 0.9 | 7.5  | 1.4 | 0.4 | 1.0 | 0.74558 | 2112.5 | 18.3 | 2168.2 | 12.2 | 2221.3 | 15.7 | 4.9  |
| Spot 157 | 1059912 | 1066405 | 27775.2  | 1.9 | 7.4 | 0.6 | 7.3  | 1.0 | 0.4 | 0.8 | 0.81289 | 2180.4 | 15.1 | 2153.9 | 9.0  | 2128.7 | 10.2 | -2.4 |
| Spot 158 | 1907634 | 1919320 | 77233.9  | 2.1 | 7.6 | 0.6 | 6.9  | 1.0 | 0.4 | 0.9 | 0.84203 | 2115.7 | 15.7 | 2104.2 | 9.2  | 2092.9 | 9.8  | -1.1 |
| Spot 159 | 419872  | 422444  | 426049.0 | 1.7 | 7.5 | 0.8 | 7.0  | 1.3 | 0.4 | 1.1 | 0.79313 | 2112.6 | 19.3 | 2112.6 | 12.0 | 2112.6 | 14.4 | 0.0  |
| Spot 160 | 4216633 | 4242463 | 380405.8 | 1.5 | 7.7 | 0.6 | 6.5  | 1.1 | 0.4 | 0.9 | 0.85521 | 2038.2 | 16.3 | 2048.1 | 9.6  | 2058.1 | 10.0 | 1.0  |
| Spot 161 | 1718032 | 1728557 | 705445.8 | 1.8 | 8.6 | 0.6 | 5.6  | 1.2 | 0.4 | 1.0 | 0.85763 | 1942.6 | 16.7 | 1910.6 | 10.0 | 1876.1 | 10.8 | -3.5 |
| Spot 162 | 1156324 | 1163407 | 108704.7 | 2.5 | 5.5 | 0.7 | 12.8 | 1.1 | 0.5 | 0.9 | 0.82206 | 2675.9 | 20.7 | 2664.7 | 10.8 | 2656.2 | 10.9 | -0.7 |

|          |         |         |           |     |     |     |      |     |     |     |         |        |      |        |      |        |      |      |
|----------|---------|---------|-----------|-----|-----|-----|------|-----|-----|-----|---------|--------|------|--------|------|--------|------|------|
| Spot 163 | 1161300 | 1168413 | 286959.7  | 2.5 | 5.1 | 0.5 | 14.5 | 1.0 | 0.5 | 0.9 | 0.88057 | 2815.3 | 19.8 | 2783.4 | 9.4  | 2760.4 | 7.7  | -2.0 |
| Spot 164 | 1421856 | 1430566 | 24425.5   | 1.4 | 8.1 | 0.7 | 6.0  | 1.0 | 0.4 | 0.7 | 0.74417 | 1987.4 | 12.8 | 1978.0 | 8.7  | 1968.2 | 11.9 | -1.0 |
| Spot 165 | 3005634 | 3024046 | 184712.4  | 1.8 | 5.1 | 0.3 | 14.0 | 0.7 | 0.5 | 0.6 | 0.89695 | 2729.6 | 13.9 | 2747.2 | 6.6  | 2760.2 | 5.1  | 1.1  |
| Spot 167 | 2150153 | 2163324 | 589398.6  | 2.3 | 4.7 | 0.6 | 17.0 | 1.2 | 0.6 | 1.0 | 0.84968 | 2964.3 | 23.4 | 2935.4 | 11.1 | 2915.6 | 9.9  | -1.7 |
| Spot 168 | 3061844 | 3080600 | 64781.9   | 1.9 | 5.4 | 0.5 | 12.7 | 0.9 | 0.5 | 0.7 | 0.84327 | 2631.1 | 16.0 | 2654.6 | 8.3  | 2672.5 | 7.8  | 1.5  |
| Spot 169 | 2603957 | 2619909 | 846126.2  | 2.1 | 5.4 | 0.5 | 12.9 | 1.1 | 0.5 | 1.0 | 0.90320 | 2664.1 | 22.2 | 2670.4 | 10.6 | 2675.2 | 8.0  | 0.4  |
| Spot 170 | 2780582 | 2797616 | 117533.9  | 3.4 | 5.3 | 0.5 | 13.3 | 1.1 | 0.5 | 1.0 | 0.89430 | 2718.3 | 21.7 | 2703.3 | 10.3 | 2692.1 | 8.1  | -1.0 |
| Spot 172 | 1319882 | 1327967 | 110122.9  | 2.9 | 5.5 | 0.5 | 13.0 | 1.0 | 0.5 | 0.9 | 0.88737 | 2714.0 | 20.1 | 2681.4 | 9.6  | 2656.9 | 7.8  | -2.1 |
| Spot 173 | 885733  | 891159  | 297448.4  | 2.5 | 7.5 | 0.5 | 7.1  | 1.0 | 0.4 | 0.9 | 0.84956 | 2131.8 | 15.7 | 2119.3 | 9.0  | 2107.2 | 9.4  | -1.2 |
| Spot 174 | 2223551 | 2237172 | 1505628.3 | 2.8 | 5.4 | 0.5 | 13.2 | 1.1 | 0.5 | 1.0 | 0.90651 | 2697.5 | 21.3 | 2693.7 | 10.1 | 2690.8 | 7.4  | -0.2 |
| Spot 175 | 1466316 | 1475298 | 13816.8   | 2.2 | 7.1 | 1.2 | 7.5  | 1.5 | 0.4 | 0.9 | 0.60479 | 2146.0 | 16.2 | 2168.6 | 13.1 | 2190.0 | 20.3 | 2.0  |
| Spot 176 | 1774485 | 1785355 | 208804.6  | 2.2 | 8.4 | 0.6 | 5.6  | 1.1 | 0.3 | 0.9 | 0.84808 | 1927.2 | 15.7 | 1920.6 | 9.6  | 1913.5 | 10.5 | -0.7 |
| Spot 177 | 1250974 | 1258637 | 1101471.5 | 2.9 | 5.4 | 0.7 | 13.2 | 1.2 | 0.5 | 1.0 | 0.84475 | 2719.8 | 22.8 | 2692.3 | 11.5 | 2671.7 | 10.8 | -1.8 |
| Spot 178 | 1444633 | 1453483 | 1258721.8 | 1.4 | 8.5 | 0.7 | 5.4  | 1.2 | 0.3 | 0.9 | 0.80250 | 1865.5 | 15.1 | 1879.6 | 9.9  | 1895.2 | 12.5 | 1.6  |
| Spot 179 | 1277512 | 1285338 | 450329.1  | 1.7 | 5.4 | 0.5 | 13.4 | 0.9 | 0.5 | 0.7 | 0.77742 | 2746.5 | 14.8 | 2707.5 | 8.1  | 2678.5 | 8.9  | -2.5 |
| Spot 180 | 1655832 | 1665975 | 191666.7  | 3.5 | 7.2 | 0.6 | 7.8  | 1.2 | 0.4 | 1.1 | 0.85839 | 2226.1 | 20.2 | 2203.3 | 11.2 | 2182.2 | 11.1 | -2.0 |
| Spot 181 | 1183173 | 1190421 | 11383.4   | 1.5 | 7.6 | 1.3 | 6.2  | 1.4 | 0.3 | 0.6 | 0.41586 | 1924.4 | 9.7  | 2005.3 | 12.3 | 2089.7 | 22.5 | 7.9  |
| Spot 182 | 1661399 | 1671576 | 90207.0   | 3.2 | 7.5 | 0.7 | 6.2  | 1.3 | 0.3 | 1.1 | 0.85090 | 1906.5 | 17.6 | 2007.9 | 11.0 | 2113.7 | 11.6 | 9.8  |
| Spot 183 | 1170764 | 1177936 | 103954.4  | 2.2 | 5.4 | 0.6 | 13.2 | 1.1 | 0.5 | 0.9 | 0.82632 | 2718.5 | 20.7 | 2697.3 | 10.7 | 2681.4 | 10.5 | -1.4 |
| Spot 184 | 2352575 | 2366986 | 15743.2   | 1.3 | 6.6 | 0.7 | 8.1  | 1.3 | 0.4 | 1.0 | 0.81355 | 2146.1 | 18.8 | 2244.6 | 11.5 | 2335.7 | 12.6 | 8.1  |
| Spot 185 | 1499290 | 1508474 | 5436801.1 | 2.9 | 5.5 | 0.6 | 13.1 | 1.1 | 0.5 | 0.9 | 0.84761 | 2720.0 | 19.8 | 2685.1 | 9.9  | 2659.0 | 9.2  | -2.3 |
| Spot 186 | 1206796 | 1214189 | 100763.8  | 3.3 | 7.2 | 0.5 | 7.7  | 1.0 | 0.4 | 0.9 | 0.86880 | 2216.1 | 16.8 | 2201.5 | 9.3  | 2187.9 | 8.9  | -1.3 |
| Spot 187 | 2320104 | 2334316 | 198008.5  | 4.0 | 7.8 | 0.5 | 6.8  | 1.1 | 0.4 | 0.9 | 0.88258 | 2114.3 | 16.9 | 2085.5 | 9.4  | 2057.2 | 8.8  | -2.8 |
| Spot 188 | 1945286 | 1957203 | 68455.5   | 1.7 | 8.0 | 0.6 | 6.1  | 1.0 | 0.4 | 0.8 | 0.78979 | 1972.2 | 13.5 | 1986.5 | 8.8  | 2001.4 | 10.9 | 1.5  |
| Spot 189 | 1855687 | 1867055 | 72973.1   | 2.0 | 5.4 | 0.5 | 13.0 | 0.8 | 0.5 | 0.7 | 0.78112 | 2688.0 | 14.5 | 2678.0 | 8.0  | 2670.6 | 8.8  | -0.7 |
| Spot 190 | 1270969 | 1278754 | 24996.7   | 3.4 | 7.3 | 0.4 | 7.4  | 0.8 | 0.4 | 0.6 | 0.83754 | 2152.1 | 11.7 | 2162.3 | 6.8  | 2171.9 | 7.3  | 0.9  |
| Spot 191 | 2009541 | 2021851 | 100007.8  | 2.9 | 7.3 | 0.7 | 7.5  | 1.1 | 0.4 | 0.9 | 0.82088 | 2167.7 | 17.3 | 2168.0 | 10.3 | 2168.2 | 11.4 | 0.0  |
| Spot 192 | 920344  | 925982  | 86224.1   | 1.6 | 7.6 | 0.6 | 7.1  | 1.0 | 0.4 | 0.8 | 0.78002 | 2147.2 | 13.8 | 2125.7 | 8.6  | 2104.9 | 10.6 | -2.0 |
| Spot 193 | 1673833 | 1684087 | 228733.5  | 2.5 | 5.4 | 0.5 | 13.1 | 0.9 | 0.5 | 0.8 | 0.86977 | 2715.5 | 17.8 | 2687.1 | 8.7  | 2665.8 | 7.5  | -1.9 |
| Spot 194 | 2125596 | 2138617 | 120784.0  | 2.9 | 5.5 | 0.5 | 13.0 | 1.0 | 0.5 | 0.9 | 0.86699 | 2715.7 | 19.7 | 2682.9 | 9.7  | 2658.2 | 8.5  | -2.2 |
| Spot 196 | 1615441 | 1625337 | 19671.2   | 2.5 | 7.1 | 0.4 | 7.4  | 0.9 | 0.4 | 0.8 | 0.88280 | 2129.5 | 14.7 | 2163.8 | 8.2  | 2196.4 | 7.5  | 3.0  |
| Spot 197 | 1901902 | 1913552 | 27792.5   | 3.2 | 6.9 | 0.6 | 7.9  | 0.9 | 0.4 | 0.7 | 0.75698 | 2177.6 | 13.2 | 2220.8 | 8.5  | 2260.9 | 10.7 | 3.7  |
| Spot 198 | 1685799 | 1696126 | 10995.4   | 1.4 | 5.1 | 0.6 | 14.8 | 1.0 | 0.6 | 0.8 | 0.82097 | 2845.7 | 18.5 | 2802.7 | 9.3  | 2772.0 | 9.2  | -2.7 |
| Spot 199 | 1741824 | 1752494 | 17369.2   | 1.5 | 7.2 | 0.7 | 7.0  | 1.1 | 0.4 | 0.8 | 0.78387 | 2046.2 | 14.4 | 2116.8 | 9.3  | 2186.1 | 11.4 | 6.4  |
| Spot 200 | 3420539 | 3441492 | 233652.5  | 2.7 | 7.5 | 0.6 | 7.0  | 1.0 | 0.4 | 0.8 | 0.78393 | 2113.2 | 14.3 | 2115.6 | 9.0  | 2118.0 | 11.0 | 0.2  |
| Spot 201 | 2331745 | 2346028 | 9049.6    | 2.0 | 6.9 | 4.6 | 6.6  | 4.8 | 0.3 | 1.5 | 0.31470 | 1888.3 | 24.9 | 2064.4 | 42.7 | 2245.1 | 79.3 | 15.9 |
| Spot 202 | 1749088 | 1759802 | 10473.7   | 1.5 | 7.6 | 0.7 | 6.2  | 1.0 | 0.4 | 0.8 | 0.78217 | 1940.3 | 13.7 | 2008.5 | 9.2  | 2079.3 | 11.5 | 6.7  |
| Spot 203 | 696113  | 700377  | 24699.6   | 1.2 | 7.6 | 0.7 | 6.7  | 1.4 | 0.4 | 1.2 | 0.86669 | 2059.4 | 21.2 | 2068.7 | 12.3 | 2078.1 | 12.2 | 0.9  |
| Spot 204 | 2387178 | 2401802 | 84599.2   | 1.8 | 7.1 | 0.5 | 7.9  | 0.8 | 0.4 | 0.6 | 0.77706 | 2225.3 | 11.9 | 2223.9 | 7.4  | 2222.5 | 8.9  | -0.1 |
| Spot 205 | 1381038 | 1389498 | 28712.2   | 1.7 | 8.0 | 0.8 | 6.0  | 1.2 | 0.4 | 0.9 | 0.74946 | 1957.2 | 15.5 | 1977.5 | 10.7 | 1998.8 | 14.4 | 2.1  |
| Spot 206 | 774571  | 779316  | 100719.2  | 3.7 | 5.2 | 0.6 | 13.6 | 1.1 | 0.5 | 0.9 | 0.83527 | 2700.1 | 20.0 | 2721.0 | 10.2 | 2736.6 | 9.8  | 1.3  |
| Spot 207 | 2778762 | 2795784 | 46403.1   | 6.5 | 7.5 | 0.5 | 6.8  | 1.1 | 0.4 | 0.9 | 0.88780 | 2075.9 | 16.7 | 2090.9 | 9.4  | 2105.7 | 8.5  | 1.4  |
| Spot 209 | 1186854 | 1194124 | 110181.8  | 1.6 | 7.4 | 0.6 | 7.2  | 1.1 | 0.4 | 0.9 | 0.81025 | 2118.4 | 15.6 | 2133.5 | 9.5  | 2148.1 | 10.9 | 1.4  |

|          |         |         |           |     |     |     |      |     |     |     |         |        |      |        |      |        |      |      |
|----------|---------|---------|-----------|-----|-----|-----|------|-----|-----|-----|---------|--------|------|--------|------|--------|------|------|
| Spot 210 | 861821  | 867101  | 99789.6   | 2.5 | 8.6 | 0.6 | 5.5  | 1.0 | 0.3 | 0.7 | 0.74662 | 1906.3 | 12.0 | 1893.8 | 8.3  | 1880.1 | 11.7 | -1.4 |
| Spot 211 | 2395107 | 2409779 | 32454.1   | 1.5 | 8.3 | 0.8 | 5.5  | 1.3 | 0.3 | 1.1 | 0.79940 | 1865.2 | 17.2 | 1897.1 | 11.4 | 1932.2 | 14.3 | 3.5  |
| Spot 212 | 2148871 | 2162034 | 101189.8  | 2.4 | 5.5 | 0.5 | 12.9 | 1.1 | 0.5 | 1.0 | 0.87939 | 2693.0 | 21.4 | 2672.3 | 10.4 | 2656.7 | 8.7  | -1.4 |
| Spot 213 | 2405896 | 2420634 | 416265.2  | 1.5 | 7.2 | 0.6 | 7.9  | 1.0 | 0.4 | 0.9 | 0.84818 | 2255.0 | 16.8 | 2216.0 | 9.4  | 2180.0 | 9.6  | -3.4 |
| Spot 214 | 1553825 | 1563344 | 86698.5   | 1.4 | 7.9 | 0.6 | 6.6  | 1.0 | 0.4 | 0.9 | 0.81713 | 2091.5 | 15.2 | 2054.9 | 9.2  | 2018.5 | 10.7 | -3.6 |
| Spot 215 | 769931  | 774648  | 97859.0   | 4.2 | 7.5 | 0.6 | 7.4  | 1.0 | 0.4 | 0.8 | 0.81236 | 2210.2 | 15.8 | 2164.0 | 9.3  | 2120.4 | 10.6 | -4.2 |
| Spot 216 | 1519209 | 1528516 | 104188.2  | 2.2 | 7.7 | 0.6 | 6.9  | 1.0 | 0.4 | 0.8 | 0.82180 | 2118.3 | 15.2 | 2095.0 | 9.1  | 2072.2 | 10.3 | -2.2 |
| Spot 217 | 1442915 | 1451754 | 1442695.4 | 2.0 | 7.9 | 0.6 | 6.5  | 1.1 | 0.4 | 0.9 | 0.83303 | 2069.4 | 16.4 | 2051.9 | 9.8  | 2034.3 | 10.9 | -1.7 |
| Spot 218 | 1477000 | 1486048 | 108126.7  | 1.6 | 8.5 | 0.7 | 5.5  | 1.2 | 0.3 | 1.0 | 0.81988 | 1905.6 | 16.4 | 1901.4 | 10.4 | 1896.7 | 12.5 | -0.5 |
| Spot 219 | 2211776 | 2225325 | 64852.4   | 2.0 | 5.4 | 0.6 | 12.8 | 1.1 | 0.5 | 0.9 | 0.84140 | 2658.2 | 19.7 | 2663.1 | 10.1 | 2666.8 | 9.6  | 0.3  |
| Spot 220 | 1586321 | 1596039 | 27355.3   | 2.5 | 5.3 | 0.7 | 13.3 | 1.1 | 0.5 | 0.9 | 0.77066 | 2681.9 | 19.2 | 2698.1 | 10.7 | 2710.2 | 11.9 | 1.0  |
| Spot 221 | 2331406 | 2345687 | 29508.1   | 2.4 | 7.9 | 0.7 | 6.1  | 1.3 | 0.4 | 1.0 | 0.81539 | 1964.1 | 17.6 | 1990.0 | 11.1 | 2017.0 | 13.1 | 2.6  |
| Spot 222 | 1141682 | 1148676 | 3953047.6 | 2.0 | 5.3 | 0.5 | 13.8 | 1.1 | 0.5 | 1.0 | 0.89693 | 2760.1 | 22.2 | 2735.9 | 10.5 | 2718.1 | 8.1  | -1.5 |
| Spot 223 | 1451732 | 1460625 | 22988.9   | 1.7 | 6.9 | 0.6 | 8.0  | 1.0 | 0.4 | 0.8 | 0.80562 | 2194.9 | 15.1 | 2233.0 | 9.1  | 2268.0 | 10.3 | 3.2  |
| Spot 224 | 2554419 | 2570067 | 126050.8  | 2.3 | 5.5 | 0.5 | 12.7 | 1.1 | 0.5 | 1.0 | 0.87844 | 2660.8 | 21.0 | 2657.5 | 10.3 | 2655.0 | 8.7  | -0.2 |
| Spot 225 | 2089451 | 2102250 | 300828.8  | 2.1 | 7.2 | 0.7 | 7.6  | 1.3 | 0.4 | 1.1 | 0.82705 | 2184.7 | 20.1 | 2185.5 | 11.8 | 2186.2 | 12.8 | 0.1  |
| Spot 226 | 1538415 | 1547839 | 301128.3  | 2.0 | 5.3 | 0.5 | 13.6 | 1.0 | 0.5 | 0.9 | 0.88045 | 2740.9 | 20.0 | 2725.0 | 9.6  | 2713.2 | 7.9  | -1.0 |
| Spot 227 | 399966  | 402416  | 67724.8   | 1.2 | 5.4 | 0.5 | 12.5 | 1.0 | 0.5 | 0.9 | 0.84781 | 2591.4 | 18.6 | 2644.4 | 9.7  | 2685.3 | 9.0  | 3.5  |
| Spot 228 | 1860666 | 1872064 | 23422.8   | 1.4 | 3.0 | 0.5 | 32.3 | 1.0 | 0.7 | 0.8 | 0.84034 | 3505.9 | 22.2 | 3559.3 | 9.6  | 3589.5 | 8.1  | 2.3  |
| Spot 229 | 2224323 | 2237949 | 92245.3   | 1.6 | 7.2 | 0.6 | 7.5  | 1.3 | 0.4 | 1.1 | 0.88867 | 2169.0 | 21.1 | 2178.5 | 11.6 | 2187.3 | 10.3 | 0.8  |
| Spot 230 | 935320  | 941049  | 98528.4   | 1.6 | 7.6 | 0.7 | 7.0  | 1.2 | 0.4 | 1.0 | 0.81212 | 2150.7 | 18.0 | 2117.4 | 10.8 | 2085.2 | 12.5 | -3.1 |
| Spot 231 | 2298257 | 2312336 | 277841.2  | 2.5 | 5.6 | 0.7 | 12.2 | 1.1 | 0.5 | 0.8 | 0.77253 | 2612.8 | 17.8 | 2619.4 | 10.1 | 2624.5 | 11.4 | 0.4  |
| Spot 232 | 2173479 | 2186793 | 11629.1   | 2.0 | 7.6 | 0.9 | 6.2  | 1.2 | 0.3 | 0.8 | 0.64266 | 1927.6 | 13.3 | 2001.3 | 10.8 | 2078.3 | 16.7 | 7.3  |
| Spot 233 | 2510029 | 2525404 | 7769539.0 | 3.3 | 8.5 | 0.7 | 5.5  | 1.1 | 0.3 | 0.8 | 0.77562 | 1909.2 | 13.5 | 1906.4 | 9.1  | 1903.3 | 11.9 | -0.3 |
| Spot 234 | 1393111 | 1401645 | 6770.2    | 2.1 | 6.6 | 0.6 | 7.9  | 1.0 | 0.4 | 0.7 | 0.76549 | 2106.8 | 13.4 | 2214.2 | 8.8  | 2315.1 | 10.7 | 9.0  |
| Spot 235 | 813124  | 818105  | 28413.5   | 1.2 | 5.1 | 0.7 | 14.3 | 1.1 | 0.5 | 0.8 | 0.76654 | 2777.6 | 19.1 | 2771.8 | 10.5 | 2767.6 | 11.6 | -0.4 |
| Spot 236 | 410896  | 413413  | 19367.6   | 0.8 | 7.8 | 0.7 | 6.5  | 1.2 | 0.4 | 1.0 | 0.83072 | 2045.8 | 17.3 | 2039.2 | 10.5 | 2032.6 | 11.7 | -0.6 |
| Spot 237 | 367529  | 369780  | 31229.9   | 3.1 | 7.6 | 0.7 | 7.1  | 1.1 | 0.4 | 0.8 | 0.77095 | 2141.7 | 15.3 | 2121.0 | 9.7  | 2101.0 | 12.1 | -1.9 |
| Spot 238 | 2400420 | 2415125 | 175408.5  | 2.4 | 5.4 | 0.6 | 12.8 | 1.1 | 0.5 | 1.0 | 0.86273 | 2632.8 | 20.6 | 2661.4 | 10.4 | 2683.2 | 9.2  | 1.9  |
| Spot 239 | 571169  | 574668  | 203112.1  | 2.8 | 7.5 | 0.7 | 7.1  | 1.2 | 0.4 | 1.0 | 0.82682 | 2111.0 | 18.3 | 2118.3 | 10.9 | 2125.3 | 12.1 | 0.7  |
| Spot 240 | 2104036 | 2116925 | 49033.5   | 1.6 | 7.4 | 0.5 | 7.1  | 1.0 | 0.4 | 0.9 | 0.84771 | 2111.1 | 15.4 | 2128.8 | 9.0  | 2146.0 | 9.4  | 1.6  |
| Spot 241 | 1543693 | 1553149 | 265102.5  | 2.8 | 5.4 | 0.7 | 13.1 | 1.2 | 0.5 | 1.0 | 0.83082 | 2685.4 | 21.8 | 2684.1 | 11.3 | 2683.2 | 11.0 | -0.1 |
| Spot 242 | 1393696 | 1402233 | 309666.1  | 2.5 | 5.4 | 0.6 | 12.8 | 1.0 | 0.5 | 0.8 | 0.79165 | 2665.2 | 16.4 | 2666.2 | 9.0  | 2666.9 | 9.6  | 0.1  |
| Spot 243 | 1374380 | 1382799 | 12985.7   | 2.1 | 7.7 | 1.5 | 6.0  | 1.7 | 0.3 | 0.7 | 0.41136 | 1900.8 | 11.4 | 1982.9 | 14.6 | 2069.7 | 27.0 | 8.2  |
| Spot 244 | 735687  | 740193  | 57552.0   | 2.1 | 7.5 | 0.7 | 7.1  | 1.3 | 0.4 | 1.0 | 0.82430 | 2139.6 | 19.0 | 2125.6 | 11.3 | 2112.0 | 12.6 | -1.3 |
| Spot 245 | 3713322 | 3736069 | 108584.0  | 4.6 | 7.4 | 0.7 | 6.9  | 1.3 | 0.4 | 1.2 | 0.87458 | 2051.2 | 20.7 | 2092.7 | 11.9 | 2133.8 | 11.4 | 3.9  |
| Spot 246 | 1576512 | 1586170 | 3338674.2 | 2.3 | 8.6 | 0.7 | 5.5  | 1.0 | 0.3 | 0.8 | 0.75285 | 1904.2 | 12.6 | 1896.8 | 8.7  | 1888.8 | 12.1 | -0.8 |
| Spot 247 | 3075990 | 3094832 | 89469.8   | 1.9 | 7.2 | 0.6 | 7.5  | 1.3 | 0.4 | 1.1 | 0.88353 | 2159.5 | 21.0 | 2176.6 | 11.6 | 2192.7 | 10.6 | 1.5  |
| Spot 248 | 3226675 | 3246441 | 8933.3    | 6.0 | 5.0 | 0.6 | 13.1 | 1.3 | 0.5 | 1.2 | 0.87900 | 2545.8 | 24.5 | 2684.7 | 12.5 | 2791.1 | 10.3 | 8.8  |
| Spot 250 | 1596024 | 1605801 | 242147.0  | 1.3 | 5.4 | 0.5 | 12.9 | 1.0 | 0.5 | 0.9 | 0.88653 | 2669.7 | 19.2 | 2675.3 | 9.4  | 2679.5 | 7.6  | 0.4  |
| Spot 251 | 1879250 | 1890762 | 397717.0  | 2.2 | 7.6 | 0.6 | 7.0  | 1.1 | 0.4 | 1.0 | 0.85684 | 2137.4 | 17.4 | 2114.4 | 9.9  | 2092.1 | 10.1 | -2.2 |
| Spot 252 | 2596563 | 2612469 | 28132.2   | 2.7 | 7.9 | 0.9 | 5.8  | 1.6 | 0.3 | 1.3 | 0.81289 | 1890.2 | 20.9 | 1951.8 | 13.6 | 2017.8 | 16.2 | 6.3  |
| Spot 253 | 2014968 | 2027311 | 1276265.7 | 1.5 | 8.5 | 0.7 | 5.4  | 1.2 | 0.3 | 1.0 | 0.79623 | 1885.2 | 15.6 | 1891.9 | 10.3 | 1899.2 | 13.1 | 0.7  |

|          |         |         |           |     |     |     |      |     |     |     |         |        |      |        |      |        |      |      |
|----------|---------|---------|-----------|-----|-----|-----|------|-----|-----|-----|---------|--------|------|--------|------|--------|------|------|
| Spot 254 | 1309924 | 1317949 | 128568.3  | 1.8 | 8.5 | 0.6 | 5.6  | 1.1 | 0.4 | 0.9 | 0.81058 | 1938.3 | 14.4 | 1917.3 | 9.2  | 1894.7 | 11.2 | -2.3 |
| Spot 255 | 1420939 | 1429644 | 19871.6   | 2.5 | 4.9 | 0.5 | 14.4 | 0.8 | 0.5 | 0.7 | 0.83128 | 2687.8 | 14.8 | 2776.6 | 7.7  | 2841.8 | 7.3  | 5.4  |
| Spot 256 | 3989069 | 4013505 | 125923.1  | 6.1 | 5.0 | 0.6 | 15.1 | 1.2 | 0.5 | 1.0 | 0.85886 | 2819.3 | 22.9 | 2821.7 | 11.1 | 2823.4 | 9.8  | 0.1  |
| Spot 257 | 2888051 | 2905742 | 33458.6   | 1.9 | 7.5 | 0.7 | 6.8  | 1.2 | 0.4 | 1.0 | 0.83191 | 2056.6 | 17.5 | 2086.7 | 10.6 | 2116.4 | 11.6 | 2.8  |
| Spot 258 | 2073456 | 2086158 | 36233.9   | 2.0 | 7.1 | 0.7 | 7.9  | 1.0 | 0.4 | 0.7 | 0.73006 | 2230.4 | 14.1 | 2222.6 | 9.2  | 2215.5 | 12.1 | -0.7 |
| Spot 259 | 1563128 | 1572704 | 17616.8   | 2.5 | 8.1 | 0.6 | 5.6  | 1.1 | 0.3 | 0.8 | 0.79335 | 1870.4 | 13.5 | 1920.9 | 9.1  | 1976.0 | 11.4 | 5.3  |
| Spot 260 | 2273134 | 2287059 | 48784.0   | 1.7 | 8.3 | 0.8 | 5.5  | 1.6 | 0.3 | 1.3 | 0.83987 | 1863.0 | 21.2 | 1898.5 | 13.4 | 1937.5 | 15.2 | 3.8  |
| Spot 261 | 1253253 | 1260930 | 1784031.5 | 2.3 | 7.7 | 0.6 | 6.9  | 1.0 | 0.4 | 0.8 | 0.78499 | 2115.2 | 14.0 | 2101.9 | 8.8  | 2088.9 | 10.8 | -1.3 |
| Spot 262 | 1963580 | 1975608 | 50165.8   | 2.6 | 8.3 | 0.5 | 5.7  | 0.8 | 0.3 | 0.7 | 0.82712 | 1931.5 | 11.7 | 1934.2 | 7.3  | 1937.1 | 8.5  | 0.3  |
| Spot 263 | 2136468 | 2149555 | 8247.9    | 1.5 | 7.4 | 0.8 | 6.1  | 1.0 | 0.3 | 0.6 | 0.61838 | 1851.5 | 10.3 | 1987.6 | 9.1  | 2132.3 | 14.3 | 13.2 |
| Spot 264 | 1492240 | 1501381 | 659171.6  | 2.6 | 5.5 | 0.7 | 12.6 | 1.1 | 0.5 | 0.8 | 0.75800 | 2666.0 | 17.6 | 2650.3 | 10.0 | 2638.4 | 11.5 | -1.0 |
| Spot 265 | 1555739 | 1565269 | 4852.8    | 4.9 | 6.1 | 1.3 | 8.7  | 1.6 | 0.4 | 0.9 | 0.55480 | 2143.3 | 16.4 | 2304.9 | 14.7 | 2451.4 | 22.8 | 12.6 |
| Spot 266 | 1796472 | 1807476 | 152475.2  | 1.8 | 7.6 | 0.6 | 6.9  | 1.0 | 0.4 | 0.8 | 0.78597 | 2097.0 | 14.5 | 2103.1 | 9.2  | 2109.1 | 11.2 | 0.6  |
| Spot 267 | 1620681 | 1630609 | 20503.7   | 2.5 | 6.8 | 0.9 | 7.9  | 1.3 | 0.4 | 0.9 | 0.73871 | 2149.3 | 17.3 | 2217.9 | 11.6 | 2281.9 | 14.9 | 5.8  |
| Spot 268 | 1107647 | 1114432 | 234679.8  | 1.8 | 8.2 | 0.5 | 6.1  | 0.9 | 0.4 | 0.8 | 0.81510 | 1998.8 | 13.2 | 1986.0 | 8.2  | 1972.6 | 9.7  | -1.3 |
| Spot 269 | 2384891 | 2399500 | 84806.4   | 2.2 | 7.4 | 0.7 | 7.2  | 1.3 | 0.4 | 1.1 | 0.83990 | 2124.7 | 20.1 | 2133.7 | 11.8 | 2142.5 | 12.5 | 0.8  |
| Spot 270 | 923598  | 929256  | 127183.3  | 1.4 | 7.2 | 0.5 | 7.8  | 0.9 | 0.4 | 0.7 | 0.82912 | 2205.9 | 13.7 | 2202.9 | 8.0  | 2200.0 | 8.6  | -0.3 |
| Spot 271 | 880585  | 885979  | 90287.1   | 1.7 | 8.1 | 0.6 | 5.9  | 1.0 | 0.4 | 0.8 | 0.82209 | 1937.0 | 13.7 | 1960.1 | 8.6  | 1984.6 | 10.1 | 2.4  |
| Spot 272 | 2070472 | 2083156 | 15375.2   | 1.9 | 7.9 | 0.7 | 5.9  | 1.0 | 0.3 | 0.6 | 0.66260 | 1905.0 | 10.6 | 1964.8 | 8.4  | 2028.4 | 12.8 | 6.1  |
| Spot 273 | 2584939 | 2600773 | 247669.7  | 5.0 | 7.6 | 0.6 | 6.8  | 1.0 | 0.4 | 0.8 | 0.77017 | 2067.7 | 13.7 | 2080.2 | 8.9  | 2092.7 | 11.3 | 1.2  |
| Spot 274 | 789667  | 794504  | 28294.5   | 2.5 | 8.1 | 0.9 | 6.0  | 1.2 | 0.4 | 0.8 | 0.67343 | 1947.1 | 13.4 | 1968.7 | 10.3 | 1991.5 | 15.6 | 2.2  |
| Spot 275 | 1010515 | 1016705 | 115321.8  | 1.2 | 7.3 | 0.8 | 7.7  | 1.3 | 0.4 | 1.0 | 0.79030 | 2219.5 | 18.8 | 2195.2 | 11.4 | 2172.5 | 13.5 | -2.2 |
| Spot 276 | 1992915 | 2005123 | 21084.8   | 1.1 | 8.0 | 1.3 | 5.9  | 1.4 | 0.3 | 0.6 | 0.41767 | 1922.5 | 9.6  | 1959.3 | 12.0 | 1998.3 | 22.3 | 3.8  |
| Spot 277 | 3425291 | 3446274 | 71397.7   | 2.3 | 8.4 | 0.5 | 5.3  | 1.4 | 0.3 | 1.3 | 0.92819 | 1820.6 | 19.9 | 1867.1 | 11.5 | 1919.3 | 9.0  | 5.1  |
| Spot 278 | 678141  | 682295  | 95054.4   | 1.1 | 5.4 | 0.7 | 12.6 | 1.3 | 0.5 | 1.0 | 0.81494 | 2609.7 | 22.1 | 2650.2 | 11.9 | 2681.3 | 12.1 | 2.7  |
| Spot 279 | 1444535 | 1453384 | 1125120.0 | 2.4 | 5.6 | 0.6 | 12.7 | 1.2 | 0.5 | 1.0 | 0.85233 | 2678.2 | 22.3 | 2654.6 | 11.2 | 2636.7 | 10.4 | -1.6 |
| Spot 280 | 1228037 | 1235560 | 13931.3   | 1.6 | 6.9 | 0.5 | 7.7  | 1.1 | 0.4 | 1.0 | 0.88715 | 2113.9 | 18.1 | 2195.2 | 10.2 | 2272.0 | 9.0  | 7.0  |
| Spot 281 | 1307003 | 1315009 | 106039.4  | 2.0 | 7.6 | 0.6 | 6.8  | 1.2 | 0.4 | 1.0 | 0.86640 | 2085.2 | 18.4 | 2091.1 | 10.6 | 2096.9 | 10.5 | 0.6  |
| Spot 282 | 1063384 | 1069898 | 57447.9   | 1.6 | 7.3 | 0.8 | 7.2  | 1.3 | 0.4 | 1.1 | 0.82779 | 2103.0 | 20.0 | 2135.1 | 12.0 | 2166.1 | 13.1 | 2.9  |
| Spot 283 | 2527866 | 2543351 | 28534.4   | 2.2 | 6.9 | 0.9 | 7.5  | 1.1 | 0.4 | 0.7 | 0.64123 | 2077.8 | 12.7 | 2172.3 | 10.0 | 2262.8 | 14.8 | 8.2  |
| Spot 284 | 2595863 | 2611765 | 6961213.1 | 2.6 | 8.5 | 0.6 | 5.5  | 1.0 | 0.3 | 0.8 | 0.81084 | 1888.3 | 13.7 | 1894.8 | 8.8  | 1902.0 | 10.8 | 0.7  |
| Spot 285 | 1270288 | 1278069 | 71056.5   | 2.2 | 8.5 | 0.5 | 5.6  | 1.0 | 0.4 | 0.8 | 0.85152 | 1952.1 | 13.8 | 1923.2 | 8.3  | 1892.1 | 9.1  | -3.2 |
| Spot 287 | 4291311 | 4317598 | 27695.8   | 2.1 | 6.9 | 0.5 | 7.6  | 1.4 | 0.4 | 1.3 | 0.92605 | 2094.2 | 22.4 | 2182.4 | 12.1 | 2266.4 | 8.8  | 7.6  |
| Spot 288 | 1442939 | 1451778 | 93206.6   | 1.5 | 5.8 | 0.6 | 11.8 | 1.0 | 0.5 | 0.9 | 0.83133 | 2611.8 | 18.7 | 2591.7 | 9.8  | 2576.1 | 9.7  | -1.4 |
| Spot 289 | 3094164 | 3113118 | 109948.3  | 1.5 | 7.4 | 0.5 | 7.2  | 1.1 | 0.4 | 1.0 | 0.87966 | 2135.6 | 18.3 | 2137.5 | 10.2 | 2139.3 | 9.5  | 0.2  |
| Spot 290 | 604781  | 608486  | 43867.6   | 1.3 | 5.1 | 0.6 | 15.0 | 1.2 | 0.6 | 1.0 | 0.85900 | 2889.9 | 23.9 | 2817.9 | 11.4 | 2766.8 | 10.0 | -4.4 |
| Spot 291 | 2363020 | 2377495 | 127009.5  | 2.6 | 3.8 | 0.4 | 23.0 | 0.9 | 0.6 | 0.8 | 0.90693 | 3186.3 | 20.1 | 3227.3 | 8.6  | 3253.0 | 5.8  | 2.1  |
| Spot 292 | 2266612 | 2280497 | 269643.8  | 2.3 | 8.6 | 0.6 | 5.5  | 1.1 | 0.3 | 1.0 | 0.84636 | 1905.8 | 16.0 | 1895.9 | 9.8  | 1885.0 | 11.0 | -1.1 |
| Spot 293 | 3492218 | 3513611 | 258090.6  | 4.8 | 7.7 | 0.5 | 6.8  | 1.1 | 0.4 | 1.0 | 0.89429 | 2086.3 | 17.7 | 2082.4 | 9.8  | 2078.6 | 8.7  | -0.4 |
| Spot 294 | 1384976 | 1393460 | 31763.3   | 2.2 | 7.3 | 0.6 | 7.7  | 0.8 | 0.4 | 0.6 | 0.74596 | 2231.8 | 11.9 | 2199.3 | 7.6  | 2169.2 | 9.8  | -2.9 |
| Spot 295 | 1711880 | 1722366 | 421266.8  | 1.0 | 5.3 | 0.6 | 13.6 | 1.0 | 0.5 | 0.8 | 0.81533 | 2721.9 | 17.5 | 2722.0 | 9.2  | 2722.1 | 9.2  | 0.0  |
| Spot 296 | 1563637 | 1573215 | 104842.0  | 2.0 | 8.6 | 0.4 | 5.4  | 1.1 | 0.3 | 1.0 | 0.91239 | 1887.3 | 16.1 | 1886.0 | 9.3  | 1884.6 | 8.0  | -0.1 |
| Spot 297 | 1569169 | 1578781 | 108422.2  | 3.3 | 6.3 | 0.6 | 9.8  | 1.1 | 0.5 | 1.0 | 0.83302 | 2428.2 | 19.4 | 2420.7 | 10.6 | 2414.4 | 10.8 | -0.6 |

|          |         |         |          |     |     |     |      |     |     |     |         |        |      |        |      |        |      |      |
|----------|---------|---------|----------|-----|-----|-----|------|-----|-----|-----|---------|--------|------|--------|------|--------|------|------|
| Spot 298 | 890153  | 895606  | 82257.5  | 1.8 | 5.5 | 0.6 | 13.1 | 1.0 | 0.5 | 0.8 | 0.82909 | 2730.0 | 18.3 | 2686.9 | 9.4  | 2654.6 | 9.2  | -2.8 |
| Spot 299 | 472979  | 475876  | 6522.8   | 2.8 | 6.7 | 1.2 | 8.1  | 1.4 | 0.4 | 0.8 | 0.58106 | 2175.5 | 15.2 | 2240.5 | 12.8 | 2300.5 | 19.8 | 5.4  |
| Spot 300 | 1384842 | 1393325 | 109250.8 | 2.0 | 8.6 | 0.6 | 5.5  | 1.1 | 0.3 | 0.9 | 0.83587 | 1923.3 | 15.8 | 1901.7 | 9.7  | 1878.1 | 11.2 | -2.4 |
| Spot 301 | 1716376 | 1726890 | 80888.4  | 2.0 | 7.4 | 0.7 | 7.2  | 1.0 | 0.4 | 0.7 | 0.73211 | 2143.4 | 13.2 | 2140.6 | 8.8  | 2137.9 | 11.8 | -0.3 |
| Spot 302 | 2105047 | 2117942 | 16334.6  | 1.6 | 7.9 | 0.7 | 5.4  | 1.1 | 0.3 | 0.8 | 0.76135 | 1775.8 | 12.5 | 1890.7 | 9.1  | 2019.4 | 12.2 | 12.1 |
| Spot 303 | 2358029 | 2372474 | 286553.3 | 2.0 | 8.6 | 0.5 | 5.4  | 0.9 | 0.3 | 0.8 | 0.84132 | 1874.8 | 12.7 | 1883.0 | 7.9  | 1892.0 | 9.0  | 0.9  |
| Spot 304 | 611159  | 614903  | 55128.1  | 1.5 | 5.6 | 0.8 | 12.3 | 1.3 | 0.5 | 1.0 | 0.77966 | 2645.1 | 22.4 | 2629.2 | 12.4 | 2617.0 | 13.8 | -1.1 |
| Spot 305 | 1671050 | 1681286 | 109400.7 | 1.7 | 7.3 | 0.5 | 7.5  | 1.1 | 0.4 | 0.9 | 0.88217 | 2186.8 | 17.5 | 2173.2 | 9.6  | 2160.3 | 8.8  | -1.2 |
| Spot 306 | 675700  | 679840  | 63880.4  | 1.8 | 7.5 | 0.6 | 7.2  | 1.1 | 0.4 | 0.9 | 0.84520 | 2160.1 | 16.4 | 2140.7 | 9.4  | 2122.2 | 9.9  | -1.8 |
| Spot 307 | 1753394 | 1764135 | 18133.6  | 2.0 | 7.9 | 1.1 | 5.9  | 1.4 | 0.3 | 0.8 | 0.58345 | 1924.0 | 13.6 | 1966.4 | 12.2 | 2011.3 | 20.2 | 4.3  |
| Spot 308 | 2711483 | 2728093 | 357066.2 | 2.2 | 8.5 | 0.5 | 5.4  | 1.0 | 0.3 | 0.8 | 0.84700 | 1868.9 | 13.4 | 1887.8 | 8.4  | 1908.6 | 9.3  | 2.1  |
| Spot 309 | 1638016 | 1648050 | 11881.5  | 1.8 | 6.3 | 1.9 | 8.7  | 2.0 | 0.4 | 0.8 | 0.40579 | 2203.1 | 15.4 | 2309.2 | 18.5 | 2404.3 | 31.6 | 8.4  |
| Spot 310 | 1330872 | 1339025 | 70023.6  | 1.6 | 5.1 | 0.5 | 14.6 | 1.0 | 0.5 | 0.9 | 0.88382 | 2806.9 | 19.4 | 2790.0 | 9.2  | 2777.8 | 7.4  | -1.0 |
| Spot 311 | 2391360 | 2406009 | 160237.3 | 3.5 | 7.7 | 0.5 | 6.6  | 1.1 | 0.4 | 0.9 | 0.85871 | 2057.3 | 16.2 | 2063.4 | 9.4  | 2069.4 | 9.6  | 0.6  |
| Spot 312 | 2231282 | 2244951 | 24295.5  | 1.7 | 7.2 | 0.8 | 7.2  | 1.2 | 0.4 | 0.8 | 0.70156 | 2091.1 | 14.7 | 2139.5 | 10.5 | 2186.2 | 14.6 | 4.3  |
| Spot 313 | 2006983 | 2019277 | 9908.8   | 2.4 | 6.8 | 1.0 | 7.8  | 1.4 | 0.4 | 1.0 | 0.69861 | 2127.6 | 17.5 | 2202.7 | 12.4 | 2273.3 | 17.1 | 6.4  |
| Spot 314 | 2161562 | 2174803 | 2345.0   | 2.9 | 5.2 | 2.3 | 10.8 | 2.4 | 0.4 | 0.8 | 0.32335 | 2268.3 | 15.1 | 2508.8 | 22.7 | 2709.7 | 38.0 | 16.3 |
| Spot 315 | 528342  | 531578  | 98809.0  | 3.1 | 7.5 | 0.7 | 7.4  | 1.1 | 0.4 | 0.9 | 0.81019 | 2199.7 | 17.1 | 2157.3 | 10.1 | 2117.1 | 11.7 | -3.9 |

**Run 2 (discordant)**

|          |         |         |           |      |     |     |      |     |     |     |         |        |      |        |      |        |      |      |
|----------|---------|---------|-----------|------|-----|-----|------|-----|-----|-----|---------|--------|------|--------|------|--------|------|------|
| Spot 106 | 1132767 | 1139706 | 90982.1   | 4.2  | 7.3 | 0.5 | 8.0  | 1.0 | 0.4 | 0.8 | 0.86752 | 2292.2 | 15.9 | 2234.1 | 8.6  | 2181.2 | 8.2  | -5.1 |
| Spot 127 | 819152  | 824170  | 682021.0  | 1.5  | 4.7 | 0.6 | 18.4 | 1.1 | 0.6 | 0.9 | 0.85617 | 3119.7 | 23.4 | 3011.0 | 10.6 | 2939.2 | 9.2  | -6.1 |
| Spot 138 | 783937  | 788739  | 2492.6    | 3.4  | 6.0 | 3.3 | 8.3  | 3.5 | 0.4 | 1.1 | 0.32812 | 1981.0 | 19.4 | 2260.7 | 31.3 | 2524.4 | 54.9 | 21.5 |
| Spot 141 | 602680  | 606372  | 36942.0   | 1.9  | 7.1 | 0.5 | 8.8  | 1.1 | 0.5 | 1.0 | 0.89565 | 2408.4 | 20.3 | 2322.6 | 10.3 | 2247.9 | 8.6  | -7.1 |
| Spot 166 | 1534272 | 1543670 | 3006662.6 | 2.8  | 8.7 | 0.7 | 5.7  | 1.2 | 0.4 | 1.0 | 0.81683 | 1974.1 | 17.2 | 1926.8 | 10.7 | 1876.4 | 12.8 | -5.2 |
| Spot 171 | 2518468 | 2533895 | 6901.3    | 2.2  | 7.4 | 0.9 | 5.2  | 1.3 | 0.3 | 0.8 | 0.65544 | 1578.4 | 11.5 | 1847.4 | 10.7 | 2165.4 | 16.5 | 27.1 |
| Spot 195 | 1598746 | 1608539 | 615315.9  | 3.4  | 8.6 | 0.6 | 4.1  | 1.2 | 0.3 | 1.1 | 0.88454 | 1464.2 | 14.2 | 1647.5 | 10.0 | 1890.0 | 10.3 | 22.5 |
| Spot 208 | 354816  | 356989  | 61285.8   | 2.4  | 7.6 | 0.7 | 7.5  | 1.2 | 0.4 | 0.9 | 0.77374 | 2248.4 | 17.3 | 2178.9 | 10.6 | 2114.1 | 13.1 | -6.4 |
| Spot 249 | 856349  | 861595  | 1066254.6 | 3.3  | 7.6 | 0.7 | 7.5  | 1.1 | 0.4 | 0.9 | 0.76769 | 2238.6 | 16.7 | 2171.1 | 10.3 | 2107.8 | 12.9 | -6.2 |
| Spot 25  | 461389  | 464216  | 191517.8  | 13.6 | 7.6 | 0.8 | 7.7  | 1.4 | 0.4 | 1.1 | 0.83016 | 2263.3 | 21.9 | 2191.1 | 12.4 | 2124.3 | 13.5 | -6.5 |
| Spot 286 | 2485499 | 2500725 | 12651.5   | 1.2  | 7.7 | 1.5 | 4.8  | 1.9 | 0.3 | 1.2 | 0.60868 | 1531.1 | 16.1 | 1786.4 | 16.3 | 2099.1 | 27.0 | 27.1 |
| Spot 33  | 1297190 | 1305136 | 2667.2    | 4.0  | 5.5 | 1.0 | 9.4  | 1.4 | 0.4 | 0.9 | 0.67850 | 2049.6 | 16.4 | 2373.6 | 12.6 | 2664.8 | 16.7 | 23.1 |
| Spot 4   | 1107347 | 1114130 | 47853.4   | 1.2  | 7.7 | 0.8 | 5.2  | 1.3 | 0.3 | 1.1 | 0.81865 | 1645.4 | 16.0 | 1851.3 | 11.5 | 2091.3 | 13.6 | 21.3 |
| Spot 41  | 2893416 | 2911140 | 3174.3    | 1.9  | 6.3 | 2.4 | 7.3  | 2.6 | 0.3 | 1.0 | 0.39751 | 1858.9 | 16.8 | 2145.5 | 23.3 | 2432.5 | 40.6 | 23.6 |
| Spot 49  | 433251  | 435905  | 100400.2  | 1.8  | 8.3 | 0.7 | 6.3  | 1.1 | 0.4 | 0.9 | 0.77207 | 2075.5 | 15.3 | 2017.2 | 9.8  | 1958.0 | 12.6 | -6.0 |
| Spot 71  | 2634419 | 2650557 | 45697.6   | 2.5  | 8.4 | 0.6 | 4.2  | 2.2 | 0.3 | 2.1 | 0.95603 | 1473.9 | 27.3 | 1676.5 | 17.8 | 1940.3 | 11.4 | 24.0 |
| Spot 79  | 3081378 | 3100254 | 8487.0    | 1.2  | 7.6 | 0.8 | 4.4  | 2.9 | 0.2 | 2.8 | 0.95723 | 1393.1 | 34.5 | 1711.5 | 23.8 | 2126.6 | 14.6 | 34.5 |

**Run 3**

|        |         |         |          |     |     |     |      |     |     |     |         |        |      |        |      |        |      |      |
|--------|---------|---------|----------|-----|-----|-----|------|-----|-----|-----|---------|--------|------|--------|------|--------|------|------|
| Spot 1 | 1262007 | 1177146 | 681429.6 | 1.6 | 7.6 | 0.6 | 7.0  | 1.0 | 0.4 | 0.9 | 0.83232 | 2121.7 | 15.8 | 2111.4 | 9.3  | 2101.4 | 10.2 | -1.0 |
| Spot 2 | 2148483 | 2004013 | 9604.0   | 1.4 | 7.6 | 1.2 | 6.1  | 1.7 | 0.3 | 1.2 | 0.72331 | 1900.5 | 19.9 | 1989.2 | 14.6 | 2082.6 | 20.3 | 8.7  |
| Spot 3 | 1679052 | 1566148 | 249722.6 | 1.9 | 5.4 | 0.6 | 12.9 | 1.0 | 0.5 | 0.7 | 0.76600 | 2665.1 | 16.0 | 2671.2 | 9.0  | 2675.8 | 10.2 | 0.4  |
| Spot 4 | 3013373 | 2810745 | 117228.4 | 2.6 | 5.2 | 0.5 | 13.7 | 0.9 | 0.5 | 0.8 | 0.85528 | 2692.6 | 17.1 | 2728.8 | 8.6  | 2755.6 | 7.7  | 2.3  |
| Spot 5 | 815960  | 761092  | 53310.0  | 1.4 | 8.5 | 0.8 | 5.7  | 1.4 | 0.4 | 1.1 | 0.81711 | 1941.5 | 18.7 | 1923.9 | 11.8 | 1905.0 | 14.1 | -1.9 |
| Spot 6 | 1618400 | 1509574 | 64574.3  | 1.7 | 8.3 | 0.5 | 5.7  | 0.8 | 0.3 | 0.6 | 0.78259 | 1925.9 | 10.7 | 1933.1 | 7.1  | 1940.8 | 9.2  | 0.8  |

|         |         |         |           |     |     |     |      |     |     |     |         |        |      |        |      |        |      |      |
|---------|---------|---------|-----------|-----|-----|-----|------|-----|-----|-----|---------|--------|------|--------|------|--------|------|------|
| Spot 7  | 1107955 | 1033453 | 146135.3  | 1.4 | 6.4 | 0.6 | 9.6  | 1.1 | 0.5 | 0.9 | 0.85770 | 2405.7 | 18.9 | 2401.0 | 10.1 | 2396.9 | 9.6  | -0.4 |
| Spot 8  | 2317780 | 2161926 | 53442.4   | 0.7 | 7.9 | 0.6 | 6.1  | 1.2 | 0.4 | 1.0 | 0.85172 | 1950.5 | 17.3 | 1988.1 | 10.5 | 2027.4 | 11.2 | 3.8  |
| Spot 9  | 2951145 | 2752702 | 2006030.7 | 0.9 | 7.7 | 0.5 | 6.7  | 1.1 | 0.4 | 1.0 | 0.87964 | 2078.7 | 17.2 | 2077.6 | 9.7  | 2076.4 | 9.2  | -0.1 |
| Spot 10 | 511514  | 477118  | 141655.0  | 1.3 | 5.1 | 0.6 | 14.3 | 1.1 | 0.5 | 0.9 | 0.83727 | 2766.4 | 21.2 | 2768.8 | 10.7 | 2770.5 | 10.1 | 0.1  |
| Spot 11 | 2563433 | 2391061 | 119428.0  | 3.3 | 7.2 | 0.5 | 7.6  | 1.0 | 0.4 | 0.9 | 0.87161 | 2178.9 | 16.8 | 2183.5 | 9.4  | 2187.7 | 8.9  | 0.4  |
| Spot 12 | 1846416 | 1722258 | 133413.6  | 2.0 | 5.6 | 0.6 | 12.3 | 1.0 | 0.5 | 0.8 | 0.82728 | 2639.5 | 17.6 | 2627.7 | 9.2  | 2618.7 | 9.2  | -0.8 |
| Spot 13 | 1276185 | 1190371 | 491389.7  | 1.6 | 7.6 | 0.7 | 7.1  | 1.0 | 0.4 | 0.7 | 0.71448 | 2153.2 | 12.8 | 2128.8 | 8.7  | 2105.3 | 12.0 | -2.3 |
| Spot 15 | 3489738 | 3255078 | 45290.4   | 2.6 | 7.7 | 0.6 | 6.4  | 1.2 | 0.4 | 1.0 | 0.86324 | 1988.3 | 17.6 | 2034.4 | 10.4 | 2081.5 | 10.6 | 4.5  |
| Spot 16 | 840989  | 784439  | 760197.3  | 2.3 | 7.4 | 0.6 | 7.4  | 1.4 | 0.4 | 1.3 | 0.89240 | 2163.6 | 23.5 | 2160.0 | 12.8 | 2156.5 | 11.3 | -0.3 |
| Spot 17 | 591987  | 552180  | 190272.9  | 1.4 | 7.3 | 0.6 | 7.7  | 1.2 | 0.4 | 1.0 | 0.84289 | 2224.7 | 18.9 | 2194.3 | 10.7 | 2166.0 | 11.2 | -2.7 |
| Spot 18 | 1115528 | 1040516 | 254519.2  | 0.9 | 8.6 | 0.5 | 5.4  | 0.9 | 0.3 | 0.7 | 0.81554 | 1890.7 | 11.7 | 1886.5 | 7.5  | 1881.9 | 9.1  | -0.5 |
| Spot 19 | 1768128 | 1649234 | 55069.1   | 1.6 | 5.5 | 0.6 | 12.7 | 1.1 | 0.5 | 0.9 | 0.81081 | 2658.8 | 19.5 | 2656.1 | 10.4 | 2654.0 | 10.7 | -0.2 |
| Spot 20 | 1103245 | 1029060 | 62447.2   | 1.3 | 7.5 | 0.7 | 7.0  | 1.2 | 0.4 | 1.0 | 0.84328 | 2107.0 | 18.9 | 2112.1 | 11.1 | 2116.9 | 11.7 | 0.5  |
| Spot 21 | 1842702 | 1718794 | 197280.7  | 2.3 | 5.5 | 0.6 | 12.9 | 1.1 | 0.5 | 0.9 | 0.84705 | 2685.8 | 20.1 | 2675.1 | 10.2 | 2667.0 | 9.5  | -0.7 |
| Spot 22 | 829486  | 773709  | 1264194.3 | 2.0 | 7.7 | 0.8 | 6.6  | 1.2 | 0.4 | 0.9 | 0.74756 | 2041.2 | 15.8 | 2061.2 | 10.7 | 2081.2 | 14.1 | 1.9  |
| Spot 23 | 1724055 | 1608124 | 1317207.5 | 1.9 | 5.4 | 0.6 | 12.9 | 1.0 | 0.5 | 0.9 | 0.82505 | 2675.9 | 18.9 | 2672.2 | 9.8  | 2669.3 | 9.8  | -0.2 |
| Spot 24 | 2307172 | 2152031 | 78265.2   | 0.8 | 5.5 | 0.5 | 12.1 | 1.1 | 0.5 | 0.9 | 0.87365 | 2564.8 | 19.5 | 2612.7 | 9.9  | 2650.0 | 8.5  | 3.2  |
| Spot 25 | 912110  | 850777  | 342377.6  | 1.2 | 8.3 | 0.7 | 6.0  | 1.1 | 0.4 | 0.9 | 0.79523 | 1990.2 | 14.8 | 1971.6 | 9.5  | 1952.1 | 11.8 | -2.0 |
| Spot 26 | 2759423 | 2573872 | 154946.0  | 2.2 | 7.5 | 0.6 | 7.1  | 1.0 | 0.4 | 0.8 | 0.81825 | 2122.7 | 15.2 | 2120.9 | 9.1  | 2119.2 | 10.3 | -0.2 |
| Spot 27 | 2517706 | 2348408 | 126481.2  | 1.2 | 5.3 | 0.5 | 13.2 | 1.2 | 0.5 | 1.0 | 0.88859 | 2678.4 | 22.9 | 2692.2 | 11.1 | 2702.5 | 8.9  | 0.9  |
| Spot 28 | 1723612 | 1607711 | 151192.9  | 1.7 | 8.6 | 0.7 | 5.5  | 1.1 | 0.3 | 0.9 | 0.75994 | 1896.0 | 14.2 | 1893.3 | 9.8  | 1890.3 | 13.3 | -0.3 |
| Spot 29 | 1334739 | 1244987 | 211116.4  | 2.4 | 7.6 | 0.6 | 6.9  | 1.0 | 0.4 | 0.8 | 0.80638 | 2098.0 | 14.3 | 2101.1 | 8.8  | 2104.1 | 10.3 | 0.3  |
| Spot 30 | 2512066 | 2343147 | 154867.6  | 1.8 | 8.4 | 0.7 | 5.5  | 1.0 | 0.3 | 0.8 | 0.72782 | 1888.7 | 12.5 | 1906.8 | 9.0  | 1926.5 | 12.9 | 2.0  |
| Spot 31 | 1742109 | 1624965 | 164695.4  | 1.2 | 4.0 | 0.6 | 21.9 | 1.0 | 0.6 | 0.8 | 0.79730 | 3168.6 | 20.4 | 3178.6 | 9.9  | 3184.8 | 9.8  | 0.5  |
| Spot 32 | 4081633 | 3807173 | 138036.1  | 2.3 | 5.7 | 0.5 | 11.8 | 1.0 | 0.5 | 0.9 | 0.87568 | 2574.1 | 19.3 | 2591.9 | 9.7  | 2605.8 | 8.4  | 1.2  |
| Spot 33 | 832526  | 776544  | 26764.4   | 1.3 | 5.4 | 0.8 | 12.9 | 1.2 | 0.5 | 0.9 | 0.73400 | 2673.9 | 19.2 | 2673.1 | 11.3 | 2672.6 | 13.5 | 0.0  |
| Spot 34 | 398961  | 372134  | #####     | 1.9 | 7.6 | 0.7 | 6.8  | 1.1 | 0.4 | 0.8 | 0.77513 | 2090.9 | 14.9 | 2092.2 | 9.6  | 2093.4 | 12.0 | 0.1  |
| Spot 35 | 121133  | 112987  | 14434.3   | 0.6 | 5.5 | 0.9 | 12.4 | 1.2 | 0.5 | 0.8 | 0.68373 | 2620.0 | 17.4 | 2633.6 | 11.1 | 2644.1 | 14.4 | 0.9  |
| Spot 36 | 366545  | 341898  | 361240.2  | 2.4 | 7.3 | 0.7 | 7.8  | 1.2 | 0.4 | 1.0 | 0.82729 | 2249.1 | 18.6 | 2210.3 | 10.7 | 2174.6 | 11.6 | -3.4 |
| Spot 37 | 1657868 | 1546388 | 88840.4   | 1.4 | 7.3 | 0.6 | 7.7  | 1.0 | 0.4 | 0.8 | 0.80695 | 2221.5 | 15.4 | 2198.4 | 9.1  | 2176.9 | 10.4 | -2.0 |
| Spot 38 | 1210654 | 1129246 | 339858.8  | 1.9 | 7.6 | 0.7 | 7.3  | 1.1 | 0.4 | 0.9 | 0.79352 | 2185.5 | 16.4 | 2148.9 | 9.9  | 2114.2 | 11.9 | -3.4 |
| Spot 39 | 1434603 | 1338136 | 152307.5  | 2.0 | 8.6 | 0.6 | 5.6  | 1.1 | 0.4 | 0.9 | 0.81941 | 1948.6 | 14.6 | 1919.5 | 9.1  | 1888.2 | 10.9 | -3.2 |
| Spot 40 | 466154  | 434809  | 124233.7  | 3.2 | 7.1 | 0.7 | 8.0  | 1.2 | 0.4 | 1.0 | 0.82611 | 2241.0 | 19.4 | 2227.9 | 11.2 | 2215.9 | 12.1 | -1.1 |
| Spot 41 | 2597822 | 2423137 | 115264.5  | 1.6 | 8.5 | 0.5 | 5.5  | 1.0 | 0.3 | 0.9 | 0.89905 | 1902.1 | 15.5 | 1898.2 | 9.0  | 1893.9 | 8.2  | -0.4 |
| Spot 42 | 636757  | 593940  | 83562.2   | 2.2 | 7.3 | 0.7 | 7.9  | 1.2 | 0.4 | 1.0 | 0.81022 | 2278.5 | 18.5 | 2225.2 | 10.7 | 2176.5 | 12.1 | -4.7 |
| Spot 43 | 1482374 | 1382695 | 609258.4  | 4.0 | 3.9 | 0.5 | 23.1 | 1.1 | 0.7 | 1.0 | 0.88518 | 3263.7 | 25.5 | 3231.1 | 11.0 | 3210.8 | 8.3  | -1.6 |
| Spot 44 | 2666196 | 2486913 | 142492.2  | 1.2 | 5.4 | 0.5 | 13.2 | 1.0 | 0.5 | 0.8 | 0.86308 | 2720.4 | 18.2 | 2695.1 | 9.0  | 2676.2 | 7.9  | -1.7 |
| Spot 45 | 1384342 | 1291255 | 16057.9   | 1.4 | 7.8 | 1.4 | 5.8  | 1.9 | 0.3 | 1.3 | 0.66296 | 1868.5 | 20.3 | 1951.3 | 16.4 | 2040.4 | 25.0 | 8.4  |
| Spot 46 | 2001904 | 1867290 | 73455.8   | 2.5 | 6.1 | 0.5 | 10.4 | 1.0 | 0.5 | 0.9 | 0.88894 | 2465.5 | 18.7 | 2472.7 | 9.5  | 2478.7 | 7.9  | 0.5  |
| Spot 47 | 3007977 | 2805712 | 23335.1   | 1.6 | 5.4 | 1.0 | 11.4 | 2.8 | 0.5 | 2.6 | 0.92926 | 2421.5 | 52.0 | 2556.9 | 25.9 | 2666.0 | 17.0 | 9.2  |
| Spot 48 | 3195763 | 2980871 | 315168.1  | 1.2 | 8.6 | 0.5 | 5.4  | 1.0 | 0.3 | 0.9 | 0.89321 | 1868.5 | 15.1 | 1880.2 | 8.9  | 1893.1 | 8.4  | 1.3  |
| Spot 49 | 1933438 | 1803428 | 32327.6   | 1.6 | 8.3 | 0.6 | 5.3  | 1.0 | 0.3 | 0.8 | 0.79933 | 1794.5 | 12.7 | 1864.3 | 8.7  | 1942.9 | 10.9 | 7.6  |
| Spot 50 | 1121967 | 1046523 | 40569.6   | 1.9 | 7.3 | 0.6 | 7.3  | 1.2 | 0.4 | 1.0 | 0.87875 | 2137.4 | 18.5 | 2154.7 | 10.3 | 2171.2 | 9.6  | 1.6  |

|         |         |         |           |     |     |     |      |     |     |     |         |        |      |        |      |        |      |      |
|---------|---------|---------|-----------|-----|-----|-----|------|-----|-----|-----|---------|--------|------|--------|------|--------|------|------|
| Spot 51 | 2508043 | 2339395 | 359583.2  | 2.3 | 7.6 | 0.6 | 6.9  | 0.9 | 0.4 | 0.8 | 0.80184 | 2097.9 | 13.5 | 2098.3 | 8.3  | 2098.6 | 9.8  | 0.0  |
| Spot 52 | 70853   | 66089   | 6601.3    | 4.2 | 5.7 | 1.0 | 11.4 | 1.4 | 0.5 | 0.9 | 0.68068 | 2544.2 | 19.4 | 2558.7 | 12.7 | 2570.1 | 16.6 | 1.0  |
| Spot 53 | 2808260 | 2619425 | 34041.2   | 1.5 | 7.0 | 0.5 | 7.9  | 1.0 | 0.4 | 0.9 | 0.86069 | 2206.1 | 16.4 | 2223.9 | 9.2  | 2240.4 | 9.0  | 1.5  |
| Spot 54 | 1474171 | 1375043 | 128913.0  | 1.6 | 5.5 | 0.6 | 13.0 | 1.2 | 0.5 | 1.0 | 0.83793 | 2704.7 | 21.9 | 2679.4 | 11.1 | 2660.2 | 10.7 | -1.7 |
| Spot 55 | 2214695 | 2065773 | 2471318.0 | 2.6 | 7.6 | 0.6 | 7.2  | 1.1 | 0.4 | 1.0 | 0.87231 | 2156.2 | 18.2 | 2133.1 | 10.1 | 2110.8 | 9.7  | -2.1 |
| Spot 56 | 1209528 | 1128196 | 108651.9  | 0.8 | 8.5 | 0.5 | 5.5  | 1.2 | 0.3 | 1.0 | 0.89401 | 1908.8 | 17.1 | 1903.4 | 9.9  | 1897.4 | 9.3  | -0.6 |
| Spot 57 | 1808441 | 1686836 | 29604.7   | 2.1 | 4.9 | 0.6 | 14.7 | 1.1 | 0.5 | 1.0 | 0.86864 | 2729.3 | 21.5 | 2797.4 | 10.6 | 2846.8 | 9.0  | 4.1  |
| Spot 58 | 1634341 | 1524443 | 124976.0  | 1.6 | 7.4 | 0.5 | 7.6  | 1.1 | 0.4 | 0.9 | 0.87276 | 2210.5 | 17.4 | 2180.6 | 9.6  | 2152.6 | 9.1  | -2.7 |
| Spot 59 | 1465409 | 1366870 | 27253.7   | 1.7 | 5.4 | 0.8 | 13.0 | 2.0 | 0.5 | 1.8 | 0.90282 | 2673.2 | 38.8 | 2676.9 | 18.5 | 2679.6 | 14.0 | 0.2  |
| Spot 60 | 837367  | 781060  | 92025.0   | 3.6 | 7.4 | 0.6 | 7.7  | 1.1 | 0.4 | 1.0 | 0.86316 | 2235.8 | 18.4 | 2196.1 | 10.1 | 2159.3 | 9.9  | -3.5 |
| Spot 61 | 1552741 | 1448331 | 1418203.3 | 1.8 | 7.3 | 0.7 | 7.8  | 1.3 | 0.4 | 1.1 | 0.86054 | 2225.1 | 20.9 | 2205.7 | 11.6 | 2187.7 | 11.4 | -1.7 |
| Spot 62 | 2306167 | 2151093 | 217945.6  | 2.8 | 7.7 | 0.6 | 7.0  | 1.3 | 0.4 | 1.1 | 0.87654 | 2123.9 | 20.2 | 2106.8 | 11.3 | 2090.1 | 10.8 | -1.6 |
| Spot 63 | 1853120 | 1728511 | 95183.0   | 1.1 | 8.6 | 0.5 | 5.5  | 1.0 | 0.3 | 0.8 | 0.84249 | 1914.7 | 13.9 | 1902.3 | 8.6  | 1888.7 | 9.6  | -1.4 |
| Spot 64 | 3548365 | 3309763 | 21138.7   | 2.8 | 7.9 | 1.8 | 5.9  | 2.1 | 0.3 | 1.2 | 0.54625 | 1897.9 | 19.1 | 1965.8 | 18.5 | 2038.0 | 31.5 | 6.9  |
| Spot 65 | 2340882 | 2183475 | 12996.2   | 1.0 | 7.7 | 1.6 | 5.5  | 2.1 | 0.3 | 1.4 | 0.67237 | 1754.5 | 21.8 | 1900.6 | 18.1 | 2064.1 | 27.5 | 15.0 |
| Spot 66 | 1969353 | 1836928 | 224466.4  | 1.7 | 8.6 | 0.5 | 5.5  | 0.9 | 0.3 | 0.7 | 0.84010 | 1900.0 | 12.0 | 1892.9 | 7.5  | 1885.2 | 8.5  | -0.8 |
| Spot 67 | 664660  | 619966  | 63071.2   | 2.3 | 6.9 | 0.6 | 8.7  | 1.3 | 0.4 | 1.1 | 0.86766 | 2338.6 | 21.7 | 2304.0 | 11.6 | 2273.4 | 10.9 | -2.9 |
| Spot 68 | 2702336 | 2520623 | 47805.4   | 3.5 | 7.6 | 0.5 | 6.9  | 1.0 | 0.4 | 0.9 | 0.85454 | 2074.2 | 15.6 | 2095.6 | 9.1  | 2116.7 | 9.4  | 2.0  |
| Spot 69 | 1532476 | 1429428 | 867364.3  | 2.0 | 5.1 | 0.6 | 15.0 | 1.1 | 0.6 | 0.9 | 0.82811 | 2830.0 | 21.7 | 2812.3 | 10.9 | 2799.6 | 10.5 | -1.1 |
| Spot 71 | 1364347 | 1272604 | 47664.2   | 1.2 | 8.7 | 0.6 | 5.4  | 1.2 | 0.3 | 1.1 | 0.89464 | 1898.9 | 18.2 | 1887.0 | 10.6 | 1874.0 | 9.9  | -1.3 |
| Spot 72 | 2978583 | 2778295 | 140218.9  | 1.2 | 7.6 | 0.5 | 7.0  | 1.0 | 0.4 | 0.9 | 0.86926 | 2105.2 | 16.3 | 2106.2 | 9.3  | 2107.2 | 9.1  | 0.1  |
| Spot 73 | 2054274 | 1916139 | 95563.5   | 1.9 | 8.4 | 0.5 | 5.8  | 0.8 | 0.4 | 0.6 | 0.78417 | 1959.4 | 10.6 | 1945.6 | 6.9  | 1931.0 | 8.9  | -1.5 |
| Spot 74 | 1969058 | 1836653 | 120773.8  | 1.9 | 5.4 | 0.6 | 12.9 | 1.1 | 0.5 | 0.9 | 0.82775 | 2652.7 | 19.0 | 2669.3 | 9.9  | 2681.8 | 9.8  | 1.1  |
| Spot 75 | 2071254 | 1931977 | 45002.3   | 2.4 | 8.4 | 0.6 | 5.6  | 1.1 | 0.3 | 0.8 | 0.80250 | 1906.9 | 13.9 | 1915.7 | 9.1  | 1925.2 | 11.2 | 0.9  |
| Spot 76 | 1230464 | 1147724 | 101302.9  | 1.4 | 7.7 | 0.5 | 7.0  | 1.0 | 0.4 | 0.8 | 0.86774 | 2122.2 | 15.0 | 2109.2 | 8.5  | 2096.5 | 8.4  | -1.2 |
| Spot 77 | 749464  | 699068  | 155495.8  | 1.6 | 7.0 | 0.7 | 8.4  | 1.2 | 0.4 | 0.9 | 0.78069 | 2290.3 | 17.3 | 2276.5 | 10.4 | 2264.0 | 12.4 | -1.2 |
| Spot 78 | 2126096 | 1983132 | 61291.3   | 2.1 | 8.2 | 0.7 | 6.0  | 1.0 | 0.4 | 0.8 | 0.76305 | 1977.9 | 13.3 | 1977.1 | 8.9  | 1976.3 | 11.8 | -0.1 |
| Spot 79 | 3146146 | 2934590 | 10039.1   | 1.9 | 5.1 | 0.5 | 12.9 | 1.1 | 0.5 | 1.0 | 0.88679 | 2546.2 | 21.1 | 2673.1 | 10.7 | 2770.5 | 8.6  | 8.1  |
| Spot 80 | 1724873 | 1608887 | 31443.3   | 1.1 | 7.2 | 0.5 | 7.6  | 1.0 | 0.4 | 0.9 | 0.88851 | 2158.0 | 16.3 | 2181.8 | 9.0  | 2204.2 | 8.0  | 2.1  |
| Spot 81 | 3973659 | 3706459 | 50052.8   | 1.8 | 7.7 | 0.6 | 6.5  | 1.0 | 0.4 | 0.7 | 0.77499 | 2010.9 | 13.0 | 2045.6 | 8.5  | 2080.6 | 10.8 | 3.4  |
| Spot 82 | 3176321 | 2962736 | 8823.1    | 1.4 | 7.5 | 2.1 | 5.5  | 2.7 | 0.3 | 1.8 | 0.65590 | 1726.3 | 27.3 | 1908.3 | 23.6 | 2112.3 | 36.3 | 18.3 |
| Spot 83 | 2039327 | 1902197 | 99388.7   | 1.3 | 6.1 | 0.6 | 11.2 | 1.1 | 0.5 | 0.9 | 0.82921 | 2583.6 | 18.9 | 2536.2 | 10.0 | 2498.5 | 10.1 | -3.4 |
| Spot 84 | 2031080 | 1894505 | 267069.7  | 1.7 | 8.2 | 0.5 | 6.0  | 1.1 | 0.4 | 1.0 | 0.90633 | 1991.1 | 17.3 | 1981.6 | 9.7  | 1971.7 | 8.4  | -1.0 |
| Spot 85 | 531477  | 495739  | 41429.8   | 1.7 | 5.5 | 0.6 | 12.6 | 1.0 | 0.5 | 0.8 | 0.78646 | 2651.8 | 17.3 | 2653.3 | 9.5  | 2654.5 | 10.4 | 0.1  |
| Spot 86 | 3466497 | 3233400 | 26626.7   | 2.2 | 8.1 | 0.7 | 5.5  | 1.1 | 0.3 | 0.9 | 0.80678 | 1813.5 | 14.5 | 1897.4 | 9.8  | 1990.5 | 11.9 | 8.9  |
| Spot 87 | 1169791 | 1091131 | 185467.9  | 2.4 | 5.4 | 0.6 | 12.9 | 1.3 | 0.5 | 1.1 | 0.87736 | 2650.7 | 24.2 | 2672.4 | 11.9 | 2688.9 | 10.0 | 1.4  |
| Spot 88 | 1976802 | 1843876 | 615052.6  | 1.6 | 8.5 | 0.5 | 5.4  | 0.7 | 0.3 | 0.6 | 0.75732 | 1872.3 | 9.2  | 1889.7 | 6.4  | 1908.8 | 8.7  | 1.9  |
| Spot 89 | 2794102 | 2606218 | 117159.4  | 3.0 | 8.5 | 0.6 | 5.6  | 1.1 | 0.3 | 0.9 | 0.85430 | 1910.4 | 15.2 | 1913.4 | 9.3  | 1916.6 | 10.0 | 0.3  |
| Spot 90 | 1172506 | 1093663 | 137541.7  | 1.1 | 8.3 | 0.6 | 6.2  | 1.0 | 0.4 | 0.8 | 0.77750 | 2033.0 | 13.3 | 1998.0 | 8.6  | 1962.0 | 11.0 | -3.6 |
| Spot 91 | 2188907 | 2041719 | 170715.0  | 1.4 | 7.6 | 0.5 | 7.0  | 0.9 | 0.4 | 0.7 | 0.77572 | 2129.8 | 12.1 | 2114.8 | 7.7  | 2100.2 | 9.6  | -1.4 |
| Spot 92 | 2377558 | 2217684 | 1224868.6 | 2.0 | 5.4 | 0.5 | 12.9 | 1.1 | 0.5 | 1.0 | 0.88816 | 2668.7 | 21.8 | 2673.2 | 10.6 | 2676.7 | 8.5  | 0.3  |
| Spot 93 | 939223  | 876067  | 945704.7  | 2.9 | 7.6 | 0.4 | 7.4  | 0.9 | 0.4 | 0.8 | 0.88193 | 2197.1 | 15.0 | 2155.8 | 8.2  | 2116.7 | 7.5  | -3.8 |
| Spot 94 | 2231128 | 2081101 | 272024.8  | 1.8 | 5.4 | 0.7 | 12.0 | 1.1 | 0.5 | 0.9 | 0.77718 | 2503.4 | 18.1 | 2606.0 | 10.5 | 2686.7 | 11.7 | 6.8  |



|          |         |         |           |     |     |     |      |     |     |     |         |        |      |        |      |        |      |      |
|----------|---------|---------|-----------|-----|-----|-----|------|-----|-----|-----|---------|--------|------|--------|------|--------|------|------|
| Spot 95  | 1058115 | 986965  | 88830.2   | 1.5 | 7.4 | 0.7 | 7.7  | 1.3 | 0.4 | 1.1 | 0.83400 | 2231.9 | 20.9 | 2196.7 | 12.0 | 2164.0 | 12.8 | -3.1 |
| Spot 96  | 1114459 | 1039519 | 94582.8   | 1.9 | 7.5 | 0.7 | 7.2  | 1.1 | 0.4 | 0.9 | 0.79817 | 2146.6 | 15.7 | 2139.2 | 9.6  | 2132.1 | 11.4 | -0.7 |
| Spot 97  | 2796859 | 2608790 | 24078.3   | 1.8 | 7.1 | 0.6 | 7.7  | 1.1 | 0.4 | 0.9 | 0.85729 | 2157.1 | 17.2 | 2193.3 | 9.8  | 2227.3 | 9.8  | 3.2  |
| Spot 98  | 1044107 | 973898  | 80258.2   | 2.2 | 5.5 | 0.6 | 13.0 | 0.9 | 0.5 | 0.6 | 0.69816 | 2709.6 | 13.3 | 2681.8 | 8.1  | 2660.9 | 10.2 | -1.8 |
| Spot 99  | 3013711 | 2811061 | 56156.8   | 1.2 | 8.4 | 0.4 | 5.5  | 1.0 | 0.3 | 0.9 | 0.90841 | 1894.4 | 14.2 | 1907.5 | 8.2  | 1921.7 | 7.2  | 1.4  |
| Spot 100 | 1247424 | 1163544 | 172038.4  | 1.1 | 7.3 | 0.6 | 7.7  | 1.1 | 0.4 | 1.0 | 0.86552 | 2217.2 | 18.4 | 2191.6 | 10.2 | 2167.7 | 9.9  | -2.3 |
| Spot 101 | 967683  | 902613  | 116601.4  | 2.0 | 5.5 | 0.7 | 12.8 | 1.1 | 0.5 | 0.9 | 0.78759 | 2666.9 | 19.7 | 2666.2 | 10.8 | 2665.6 | 11.7 | -0.1 |
| Spot 102 | 2503836 | 2335471 | 11369.3   | 1.3 | 7.7 | 0.7 | 5.5  | 1.3 | 0.3 | 1.2 | 0.86686 | 1752.6 | 17.7 | 1907.2 | 11.4 | 2079.7 | 11.7 | 15.7 |
| Spot 103 | 1783816 | 1663867 | 228336.6  | 2.3 | 8.6 | 0.7 | 5.5  | 1.2 | 0.3 | 1.0 | 0.82045 | 1897.2 | 15.8 | 1897.1 | 10.0 | 1897.0 | 12.0 | 0.0  |
| Spot 104 | 2613127 | 2437413 | 68528.2   | 2.0 | 8.5 | 0.5 | 5.5  | 1.0 | 0.3 | 0.8 | 0.85427 | 1897.1 | 13.7 | 1903.7 | 8.4  | 1910.7 | 9.1  | 0.7  |
| Spot 105 | 1815007 | 1692961 | 112244.6  | 1.2 | 8.6 | 0.5 | 5.4  | 1.2 | 0.3 | 1.0 | 0.88567 | 1892.9 | 16.9 | 1888.1 | 10.0 | 1882.9 | 9.7  | -0.5 |
| Spot 106 | 3461027 | 3228298 | 181975.5  | 1.3 | 5.5 | 0.6 | 12.9 | 1.2 | 0.5 | 1.0 | 0.84578 | 2680.4 | 21.4 | 2672.4 | 10.9 | 2666.4 | 10.2 | -0.5 |
| Spot 107 | 1935527 | 1805377 | 86074.2   | 1.7 | 7.6 | 0.6 | 7.1  | 1.1 | 0.4 | 1.0 | 0.83132 | 2139.9 | 17.4 | 2119.5 | 10.2 | 2099.8 | 11.2 | -1.9 |
| Spot 108 | 2387385 | 2226850 | 118990.8  | 1.2 | 7.9 | 0.6 | 6.5  | 1.1 | 0.4 | 0.9 | 0.82941 | 2041.6 | 16.5 | 2040.5 | 10.0 | 2039.4 | 11.2 | -0.1 |
| Spot 109 | 1674431 | 1561837 | 107871.9  | 1.8 | 8.3 | 0.7 | 6.0  | 1.3 | 0.4 | 1.1 | 0.83974 | 1989.9 | 18.2 | 1975.1 | 11.0 | 1959.7 | 12.3 | -1.5 |
| Spot 110 | 1896619 | 1769085 | 104501.1  | 2.2 | 7.2 | 0.6 | 7.8  | 1.1 | 0.4 | 1.0 | 0.84701 | 2221.7 | 17.9 | 2209.7 | 10.1 | 2198.7 | 10.4 | -1.0 |
| Spot 111 | 2354603 | 2196272 | 52280.7   | 1.4 | 8.4 | 0.5 | 5.6  | 0.9 | 0.3 | 0.8 | 0.85698 | 1913.7 | 13.4 | 1920.4 | 8.2  | 1927.6 | 8.7  | 0.7  |
| Spot 112 | 1337847 | 1247887 | 244189.6  | 2.2 | 7.6 | 0.7 | 7.1  | 1.2 | 0.4 | 1.0 | 0.82620 | 2140.1 | 17.9 | 2129.2 | 10.6 | 2118.6 | 11.8 | -1.0 |
| Spot 113 | 2644925 | 2467073 | 60562.0   | 1.5 | 7.3 | 0.7 | 7.3  | 1.3 | 0.4 | 1.0 | 0.80831 | 2106.1 | 18.2 | 2145.5 | 11.2 | 2183.5 | 12.9 | 3.5  |
| Spot 114 | 3417444 | 3187646 | 15539.7   | 2.0 | 7.7 | 1.2 | 6.1  | 1.6 | 0.3 | 1.0 | 0.63906 | 1923.4 | 16.6 | 1993.0 | 13.7 | 2066.0 | 21.2 | 6.9  |
| Spot 115 | 1601181 | 1493513 | 1788293.3 | 1.1 | 7.7 | 0.6 | 6.7  | 1.1 | 0.4 | 0.9 | 0.80762 | 2045.7 | 15.6 | 2069.6 | 9.7  | 2093.6 | 11.4 | 2.3  |
| Spot 116 | 1146934 | 1069811 | 174421.9  | 1.6 | 7.6 | 0.6 | 7.0  | 1.1 | 0.4 | 0.9 | 0.83632 | 2123.1 | 16.6 | 2115.2 | 9.8  | 2107.5 | 10.6 | -0.7 |
| Spot 117 | 1897050 | 1769487 | 97458.1   | 1.8 | 5.5 | 0.6 | 13.0 | 1.1 | 0.5 | 0.9 | 0.85153 | 2694.3 | 20.0 | 2681.6 | 10.1 | 2672.0 | 9.3  | -0.8 |
| Spot 118 | 1390288 | 1296801 | 15246.2   | 1.5 | 7.1 | 0.6 | 7.5  | 1.0 | 0.4 | 0.8 | 0.79340 | 2115.3 | 13.9 | 2168.1 | 8.7  | 2218.4 | 10.2 | 4.6  |
| Spot 119 | 1212917 | 1131357 | 144776.8  | 1.3 | 7.6 | 0.5 | 7.2  | 0.7 | 0.4 | 0.5 | 0.71905 | 2152.8 | 9.8  | 2132.6 | 6.6  | 2113.2 | 9.1  | -1.9 |
| Spot 120 | 1009023 | 941174  | 206175.2  | 2.7 | 7.4 | 0.6 | 7.5  | 1.2 | 0.4 | 1.0 | 0.84013 | 2202.8 | 18.4 | 2173.6 | 10.5 | 2146.1 | 11.1 | -2.6 |
| Spot 121 | 3219909 | 3003394 | 1332081.2 | 1.9 | 8.6 | 0.5 | 5.5  | 1.0 | 0.3 | 0.9 | 0.88370 | 1922.2 | 15.1 | 1905.6 | 8.8  | 1887.6 | 8.7  | -1.8 |
| Spot 122 | 2610183 | 2434667 | 45464.5   | 1.9 | 5.5 | 0.5 | 12.7 | 1.2 | 0.5 | 1.1 | 0.91452 | 2649.5 | 23.7 | 2661.0 | 11.2 | 2669.7 | 8.0  | 0.8  |
| Spot 123 | 1646830 | 1536093 | 350197.8  | 2.2 | 5.9 | 0.5 | 11.4 | 1.2 | 0.5 | 1.1 | 0.89128 | 2559.0 | 22.5 | 2556.0 | 11.1 | 2553.6 | 9.1  | -0.2 |
| Spot 125 | 1916829 | 1787936 | 156552.0  | 3.2 | 7.2 | 0.5 | 7.8  | 0.9 | 0.4 | 0.7 | 0.82181 | 2216.3 | 13.3 | 2205.2 | 7.7  | 2194.9 | 8.5  | -1.0 |
| Spot 126 | 3390295 | 3162322 | 564306.1  | 2.5 | 7.3 | 0.6 | 7.6  | 1.2 | 0.4 | 1.0 | 0.87324 | 2191.7 | 18.9 | 2181.8 | 10.4 | 2172.6 | 9.9  | -0.9 |
| Spot 127 | 1450447 | 1352915 | 77203.2   | 2.3 | 8.5 | 0.7 | 5.5  | 1.2 | 0.3 | 1.0 | 0.84200 | 1901.9 | 17.0 | 1900.1 | 10.5 | 1898.1 | 11.9 | -0.2 |
| Spot 128 | 2671211 | 2491591 | 25021.6   | 1.8 | 8.1 | 0.9 | 5.5  | 1.5 | 0.3 | 1.1 | 0.77080 | 1817.9 | 18.0 | 1893.8 | 12.6 | 1978.1 | 16.7 | 8.1  |
| Spot 129 | 1333417 | 1243754 | 172876.5  | 1.4 | 8.5 | 0.6 | 5.6  | 0.8 | 0.3 | 0.6 | 0.68175 | 1927.3 | 9.6  | 1913.9 | 7.3  | 1899.4 | 11.1 | -1.5 |
| Spot 130 | 1298861 | 1211522 | 46687.1   | 1.2 | 8.0 | 0.6 | 6.1  | 0.9 | 0.4 | 0.7 | 0.79520 | 1988.9 | 12.7 | 1996.4 | 8.1  | 2004.1 | 10.0 | 0.8  |
| Spot 131 | 834020  | 777938  | 91755.3   | 2.6 | 5.6 | 0.5 | 12.5 | 1.0 | 0.5 | 0.8 | 0.83623 | 2668.5 | 17.8 | 2639.4 | 9.1  | 2617.2 | 8.9  | -2.0 |
| Spot 132 | 1200025 | 1119332 | 36776.6   | 1.8 | 5.3 | 0.6 | 13.6 | 1.0 | 0.5 | 0.8 | 0.78242 | 2720.1 | 17.9 | 2721.8 | 9.7  | 2723.0 | 10.6 | 0.1  |
| Spot 133 | 1916877 | 1787981 | 29305.3   | 1.4 | 8.4 | 0.6 | 5.5  | 1.0 | 0.3 | 0.8 | 0.80705 | 1878.4 | 13.4 | 1903.9 | 8.8  | 1931.8 | 10.8 | 2.8  |
| Spot 134 | 1521861 | 1419527 | 94977.9   | 1.6 | 5.5 | 0.6 | 13.2 | 1.3 | 0.5 | 1.1 | 0.88688 | 2725.1 | 24.7 | 2695.0 | 11.8 | 2672.4 | 9.6  | -2.0 |
| Spot 135 | 3366904 | 3140504 | 108048.0  | 2.1 | 8.6 | 0.6 | 4.9  | 3.0 | 0.3 | 2.9 | 0.97966 | 1732.1 | 44.2 | 1807.1 | 25.1 | 1894.7 | 10.7 | 8.6  |
| Spot 136 | 454386  | 423832  | 2516.2    | 2.8 | 5.2 | 2.7 | 11.2 | 3.0 | 0.4 | 1.2 | 0.41313 | 2334.0 | 23.9 | 2542.2 | 27.6 | 2712.7 | 44.5 | 14.0 |
| Spot 137 | 3065094 | 2858988 | 39835.3   | 2.0 | 8.3 | 0.7 | 5.6  | 1.1 | 0.3 | 0.9 | 0.79156 | 1884.2 | 13.9 | 1911.1 | 9.2  | 1940.4 | 11.7 | 2.9  |
| Spot 138 | 3707354 | 3458061 | 23639.6   | 2.0 | 8.2 | 0.6 | 5.5  | 1.2 | 0.3 | 1.1 | 0.87668 | 1823.4 | 17.1 | 1896.0 | 10.5 | 1976.5 | 10.5 | 7.7  |

|          |         |         |           |      |     |     |      |     |     |     |         |        |      |        |      |        |      |      |
|----------|---------|---------|-----------|------|-----|-----|------|-----|-----|-----|---------|--------|------|--------|------|--------|------|------|
| Spot 139 | 1333867 | 1244174 | #####     | 1.6  | 5.6 | 0.6 | 12.4 | 1.1 | 0.5 | 1.0 | 0.85953 | 2652.9 | 21.3 | 2633.4 | 10.7 | 2618.5 | 9.7  | -1.3 |
| Spot 140 | 3053755 | 2848412 | 566620.9  | 2.7  | 7.3 | 0.6 | 7.6  | 1.0 | 0.4 | 0.8 | 0.80300 | 2196.3 | 14.7 | 2189.1 | 8.8  | 2182.4 | 10.2 | -0.6 |
| Spot 141 | 2116624 | 1974296 | 180542.7  | 4.5  | 4.3 | 0.4 | 19.5 | 0.9 | 0.6 | 0.8 | 0.86600 | 3081.9 | 19.1 | 3065.6 | 8.7  | 3055.0 | 7.2  | -0.9 |
| Spot 142 | 1057695 | 986572  | 111807.3  | 1.0  | 8.6 | 0.7 | 5.6  | 1.3 | 0.3 | 1.1 | 0.83558 | 1927.9 | 17.8 | 1912.9 | 11.0 | 1896.7 | 12.6 | -1.6 |
| Spot 143 | 1323860 | 1234840 | 127670.7  | 2.4  | 7.6 | 0.6 | 7.0  | 1.0 | 0.4 | 0.9 | 0.82925 | 2127.4 | 15.6 | 2112.2 | 9.2  | 2097.3 | 10.2 | -1.4 |
| Spot 144 | 508341  | 474158  | 66548.1   | 2.2  | 7.3 | 0.8 | 7.5  | 1.2 | 0.4 | 0.9 | 0.75321 | 2172.0 | 16.7 | 2168.1 | 10.8 | 2164.3 | 13.8 | -0.4 |
| Spot 145 | 3243753 | 3025634 | 291606.5  | 2.1  | 5.5 | 0.5 | 12.9 | 0.9 | 0.5 | 0.7 | 0.84767 | 2678.9 | 16.4 | 2668.9 | 8.3  | 2661.3 | 7.8  | -0.7 |
| Spot 146 | 2129503 | 1986310 | 65626.1   | 1.0  | 5.0 | 0.5 | 14.5 | 0.7 | 0.5 | 0.6 | 0.78225 | 2730.3 | 12.7 | 2783.5 | 6.9  | 2822.3 | 7.4  | 3.3  |
| Spot 147 | 2525158 | 2355359 | 30565.2   | 1.0  | 5.4 | 0.4 | 12.5 | 1.0 | 0.5 | 0.9 | 0.88852 | 2574.3 | 18.1 | 2644.5 | 9.0  | 2698.6 | 7.3  | 4.6  |
| Spot 148 | 1247585 | 1163694 | 601042.7  | 8.9  | 4.9 | 0.5 | 15.5 | 1.0 | 0.6 | 0.9 | 0.87830 | 2862.8 | 20.5 | 2847.6 | 9.6  | 2836.8 | 7.9  | -0.9 |
| Spot 149 | 1571518 | 1465844 | 65992.6   | 1.6  | 8.5 | 0.6 | 5.4  | 1.0 | 0.3 | 0.8 | 0.80848 | 1865.9 | 13.2 | 1880.0 | 8.6  | 1895.6 | 10.6 | 1.6  |
| Spot 150 | 3745412 | 3493560 | 748803.6  | 3.4  | 5.4 | 0.5 | 13.1 | 1.0 | 0.5 | 0.9 | 0.85596 | 2693.0 | 19.4 | 2683.3 | 9.7  | 2676.1 | 8.8  | -0.6 |
| Spot 151 | 1287997 | 1201389 | 545282.3  | 1.3  | 7.6 | 0.5 | 6.9  | 0.9 | 0.4 | 0.7 | 0.85123 | 2088.8 | 13.1 | 2093.9 | 7.7  | 2098.8 | 8.0  | 0.5  |
| Spot 152 | 2437215 | 2273329 | 169768.1  | 4.2  | 7.5 | 0.5 | 7.1  | 0.9 | 0.4 | 0.7 | 0.82413 | 2135.1 | 13.3 | 2129.1 | 7.9  | 2123.4 | 8.8  | -0.6 |
| Spot 153 | 1728654 | 1612415 | 12391.1   | 2.1  | 7.8 | 0.8 | 5.8  | 1.0 | 0.3 | 0.7 | 0.68451 | 1863.6 | 11.6 | 1952.8 | 9.0  | 2048.7 | 13.4 | 9.0  |
| Spot 154 | 1413497 | 1318449 | 1447222.6 | 1.1  | 7.4 | 0.5 | 7.2  | 1.0 | 0.4 | 0.8 | 0.83336 | 2132.9 | 14.6 | 2140.0 | 8.6  | 2146.8 | 9.3  | 0.6  |
| Spot 155 | 1407640 | 1312987 | 628663.3  | 1.3  | 7.7 | 0.7 | 6.8  | 1.2 | 0.4 | 1.0 | 0.79873 | 2080.1 | 17.1 | 2084.7 | 10.6 | 2089.2 | 12.7 | 0.4  |
| Spot 156 | 933635  | 870855  | 104836.6  | 1.0  | 7.5 | 0.5 | 7.2  | 1.0 | 0.4 | 0.8 | 0.83273 | 2137.7 | 14.7 | 2138.3 | 8.6  | 2138.8 | 9.4  | 0.1  |
| Spot 157 | 3369806 | 3143210 | 94119.9   | 2.1  | 7.5 | 0.5 | 6.8  | 1.0 | 0.4 | 0.8 | 0.82355 | 2058.3 | 13.8 | 2091.8 | 8.4  | 2125.0 | 9.5  | 3.1  |
| Spot 158 | 1247576 | 1163686 | 173904.2  | 1.4  | 7.4 | 0.4 | 7.2  | 1.1 | 0.4 | 1.0 | 0.90843 | 2118.5 | 17.2 | 2134.6 | 9.4  | 2150.1 | 7.7  | 1.5  |
| Spot 160 | 2041997 | 1904687 | 89076.7   | 1.1  | 8.1 | 0.6 | 6.1  | 0.9 | 0.4 | 0.7 | 0.80524 | 1994.6 | 12.9 | 1991.3 | 8.1  | 1988.0 | 9.8  | -0.3 |
| Spot 162 | 750108  | 699669  | 58408.2   | 1.8  | 7.5 | 0.7 | 7.2  | 1.1 | 0.4 | 0.9 | 0.78863 | 2134.1 | 16.4 | 2134.2 | 10.2 | 2134.3 | 12.3 | 0.0  |
| Spot 163 | 1457345 | 1359349 | 316404.4  | 1.8  | 7.4 | 0.5 | 7.5  | 1.2 | 0.4 | 1.1 | 0.88681 | 2174.4 | 19.4 | 2170.4 | 10.6 | 2166.6 | 9.6  | -0.4 |
| Spot 164 | 2077275 | 1937593 | 360212.9  | 1.3  | 3.7 | 0.6 | 21.7 | 1.0 | 0.6 | 0.8 | 0.80387 | 2998.4 | 19.3 | 3168.6 | 9.7  | 3278.2 | 9.4  | 8.5  |
| Spot 165 | 1349782 | 1259019 | 107472.7  | 2.3  | 8.5 | 0.6 | 5.6  | 0.9 | 0.3 | 0.7 | 0.73523 | 1920.6 | 11.2 | 1915.2 | 7.9  | 1909.3 | 11.1 | -0.6 |
| Spot 166 | 2224553 | 2074967 | 163067.3  | 1.6  | 8.3 | 0.5 | 5.7  | 1.1 | 0.3 | 1.0 | 0.88127 | 1920.1 | 16.4 | 1935.2 | 9.7  | 1951.5 | 9.4  | 1.6  |
| Spot 167 | 5664688 | 5283779 | 100679.7  | 1.7  | 4.5 | 0.5 | 19.2 | 0.9 | 0.6 | 0.8 | 0.84677 | 3139.6 | 19.4 | 3053.3 | 8.9  | 2996.9 | 7.9  | -4.8 |
| Spot 168 | 1733361 | 1616805 | 143814.8  | 2.1  | 5.5 | 0.7 | 12.9 | 1.1 | 0.5 | 0.9 | 0.80600 | 2671.3 | 20.0 | 2670.1 | 10.7 | 2669.2 | 11.1 | -0.1 |
| Spot 169 | 2727804 | 2544379 | 1179487.9 | 11.2 | 7.6 | 0.4 | 7.0  | 1.0 | 0.4 | 0.9 | 0.88977 | 2112.8 | 15.4 | 2115.2 | 8.5  | 2117.5 | 7.7  | 0.2  |
| Spot 170 | 560444  | 522758  | 136117.8  | 1.8  | 5.5 | 0.5 | 13.0 | 0.9 | 0.5 | 0.8 | 0.83255 | 2698.2 | 17.1 | 2681.0 | 8.8  | 2668.1 | 8.5  | -1.1 |
| Spot 171 | 2527330 | 2357385 | 94044.2   | 1.9  | 8.6 | 0.7 | 5.8  | 1.0 | 0.4 | 0.8 | 0.77404 | 1990.1 | 13.7 | 1945.4 | 9.0  | 1898.2 | 11.8 | -4.8 |
| Spot 172 | 2426766 | 2263584 | 33327.4   | 1.4  | 7.2 | 0.6 | 6.8  | 1.6 | 0.4 | 1.5 | 0.92171 | 1974.6 | 25.2 | 2081.8 | 14.2 | 2189.5 | 10.8 | 9.8  |
| Spot 173 | 1029384 | 960165  | 202467.1  | 0.6  | 5.7 | 0.7 | 12.0 | 1.1 | 0.5 | 0.9 | 0.78420 | 2608.3 | 18.5 | 2606.2 | 10.3 | 2604.6 | 11.3 | -0.1 |
| Spot 174 | 1746732 | 1629277 | 34794.2   | 1.5  | 7.3 | 0.6 | 7.5  | 1.0 | 0.4 | 0.8 | 0.78164 | 2162.6 | 14.7 | 2175.2 | 9.2  | 2187.1 | 11.1 | 1.1  |
| Spot 175 | 2284858 | 2131217 | 112601.9  | 2.7  | 7.6 | 0.5 | 7.1  | 1.2 | 0.4 | 1.0 | 0.89695 | 2140.3 | 18.9 | 2121.3 | 10.3 | 2102.9 | 9.0  | -1.8 |
| Spot 176 | 1967213 | 1834932 | 2645754.6 | 1.8  | 5.5 | 0.5 | 12.9 | 0.9 | 0.5 | 0.8 | 0.83138 | 2670.6 | 16.9 | 2673.6 | 8.8  | 2675.9 | 8.6  | 0.2  |
| Spot 177 | 1761939 | 1643461 | 94622.9   | 2.2  | 8.6 | 0.5 | 5.5  | 1.1 | 0.3 | 1.0 | 0.87834 | 1917.5 | 16.0 | 1904.9 | 9.5  | 1891.2 | 9.5  | -1.4 |
| Spot 178 | 1554704 | 1450161 | 194565.0  | 1.9  | 5.5 | 0.6 | 12.9 | 1.1 | 0.5 | 0.9 | 0.83451 | 2672.2 | 20.2 | 2674.0 | 10.4 | 2675.3 | 10.1 | 0.1  |
| Spot 179 | 3010498 | 2808064 | 181685.3  | 4.8  | 5.0 | 0.6 | 14.9 | 1.1 | 0.5 | 1.0 | 0.86768 | 2800.2 | 22.0 | 2809.4 | 10.6 | 2816.0 | 9.1  | 0.6  |
| Spot 180 | 1486314 | 1386370 | 159019.6  | 1.8  | 7.0 | 0.5 | 8.2  | 1.0 | 0.4 | 0.8 | 0.84998 | 2245.7 | 16.0 | 2253.4 | 9.0  | 2260.3 | 9.0  | 0.6  |
| Spot 181 | 2029028 | 1892590 | 32353.2   | 2.1  | 8.3 | 0.7 | 5.6  | 1.0 | 0.3 | 0.7 | 0.68613 | 1877.7 | 11.0 | 1914.1 | 8.4  | 1953.8 | 12.7 | 3.9  |
| Spot 182 | 803400  | 749378  | 128699.1  | 2.4  | 5.5 | 0.5 | 13.3 | 1.0 | 0.5 | 0.8 | 0.85459 | 2733.2 | 18.6 | 2699.4 | 9.2  | 2674.2 | 8.4  | -2.2 |
| Spot 183 | 2823076 | 2633245 | 36868.2   | 3.3  | 7.4 | 0.6 | 7.1  | 1.3 | 0.4 | 1.2 | 0.89331 | 2085.8 | 21.0 | 2123.7 | 11.7 | 2160.7 | 10.3 | 3.5  |

|          |          |          |           |      |     |     |      |     |     |     |         |        |      |        |      |        |      |      |
|----------|----------|----------|-----------|------|-----|-----|------|-----|-----|-----|---------|--------|------|--------|------|--------|------|------|
| Spot 184 | 1402271  | 1307979  | 105157.3  | 2.2  | 7.3 | 0.7 | 7.5  | 1.0 | 0.4 | 0.7 | 0.67917 | 2150.6 | 12.2 | 2170.9 | 8.8  | 2190.1 | 12.5 | 1.8  |
| Spot 185 | 773741   | 721712   | 36101.7   | 1.0  | 7.5 | 0.6 | 7.2  | 1.1 | 0.4 | 1.0 | 0.86756 | 2141.4 | 17.6 | 2134.8 | 9.9  | 2128.5 | 9.7  | -0.6 |
| Spot 186 | 2203834  | 2055642  | 95767.8   | 1.6  | 7.4 | 0.5 | 7.4  | 0.9 | 0.4 | 0.8 | 0.84881 | 2173.0 | 14.7 | 2160.6 | 8.4  | 2148.9 | 8.7  | -1.1 |
| Spot 187 | 1565370  | 1460111  | 105834.7  | 2.1  | 5.6 | 0.6 | 12.4 | 0.9 | 0.5 | 0.7 | 0.77812 | 2628.2 | 15.9 | 2633.3 | 8.9  | 2637.3 | 9.9  | 0.3  |
| Spot 188 | 1451571  | 1353963  | 88595.2   | 1.5  | 7.7 | 0.6 | 7.0  | 1.2 | 0.4 | 1.0 | 0.85879 | 2129.4 | 18.7 | 2108.1 | 10.7 | 2087.4 | 10.8 | -2.0 |
| Spot 189 | 3493826  | 3258891  | 67873.5   | 2.4  | 5.0 | 0.5 | 13.8 | 1.3 | 0.5 | 1.2 | 0.91378 | 2636.0 | 25.3 | 2735.1 | 12.1 | 2809.1 | 8.5  | 6.2  |
| Spot 190 | 862887   | 804864   | 7147.5    | 1.0  | 3.9 | 0.7 | 21.8 | 1.1 | 0.6 | 0.8 | 0.78682 | 3136.1 | 20.8 | 3176.7 | 10.3 | 3202.5 | 10.4 | 2.1  |
| Spot 191 | 3856811  | 3597468  | 119904.8  | 0.9  | 7.7 | 0.4 | 6.7  | 0.9 | 0.4 | 0.8 | 0.86652 | 2070.1 | 13.6 | 2077.8 | 7.8  | 2085.5 | 7.8  | 0.7  |
| Spot 192 | 2156846  | 2011814  | 930948.9  | 1.7  | 5.5 | 0.6 | 13.3 | 1.0 | 0.5 | 0.8 | 0.82149 | 2731.5 | 18.7 | 2699.1 | 9.7  | 2674.9 | 9.7  | -2.1 |
| Spot 193 | 864520   | 806387   | 83898.3   | 1.5  | 7.3 | 0.6 | 8.0  | 1.1 | 0.4 | 1.0 | 0.83042 | 2273.5 | 18.2 | 2229.3 | 10.3 | 2189.0 | 11.1 | -3.9 |
| Spot 194 | 1392128  | 1298518  | 456696.2  | 2.2  | 5.5 | 0.6 | 13.0 | 1.0 | 0.5 | 0.9 | 0.82113 | 2691.6 | 18.9 | 2682.7 | 9.9  | 2676.1 | 9.9  | -0.6 |
| Spot 195 | 310453   | 289577   | 490383.4  | 1.4  | 3.7 | 0.6 | 24.8 | 1.5 | 0.7 | 1.3 | 0.90890 | 3320.0 | 35.0 | 3299.1 | 14.5 | 3286.3 | 9.7  | -1.0 |
| Spot 196 | 2251830  | 2100410  | 2164843.5 | 2.2  | 5.4 | 0.6 | 13.4 | 1.0 | 0.5 | 0.8 | 0.80393 | 2735.3 | 17.1 | 2709.6 | 9.0  | 2690.5 | 9.4  | -1.7 |
| Spot 197 | 1078927  | 1006377  | 417715.1  | 2.2  | 5.4 | 0.6 | 12.7 | 1.0 | 0.5 | 0.9 | 0.81602 | 2627.9 | 18.4 | 2659.9 | 9.8  | 2684.4 | 10.0 | 2.1  |
| Spot 198 | 1108021  | 1033514  | 206129.4  | 1.5  | 6.9 | 0.5 | 8.6  | 1.1 | 0.4 | 1.0 | 0.87155 | 2301.0 | 18.4 | 2296.7 | 9.9  | 2292.9 | 9.2  | -0.4 |
| Spot 199 | 1806699  | 1685211  | 21408.0   | 1.0  | 7.1 | 0.6 | 7.6  | 0.9 | 0.4 | 0.6 | 0.71011 | 2143.5 | 11.2 | 2184.0 | 7.8  | 2222.2 | 10.6 | 3.5  |
| Spot 200 | 1734960  | 1618296  | 68264.3   | 1.6  | 5.4 | 0.5 | 13.2 | 0.9 | 0.5 | 0.8 | 0.83004 | 2693.0 | 16.8 | 2692.0 | 8.7  | 2691.3 | 8.5  | -0.1 |
| Spot 201 | 1286014  | 1199539  | 333869.8  | 2.2  | 7.2 | 0.5 | 7.8  | 1.0 | 0.4 | 0.9 | 0.85334 | 2215.2 | 16.1 | 2210.9 | 9.1  | 2207.0 | 9.1  | -0.4 |
| Spot 202 | 1490233  | 1390026  | 145507.4  | 1.5  | 8.6 | 0.5 | 5.6  | 1.1 | 0.3 | 0.9 | 0.85679 | 1924.1 | 15.1 | 1913.6 | 9.1  | 1902.2 | 9.8  | -1.2 |
| Spot 203 | 2059481  | 1920996  | 20358.8   | 3.4  | 7.0 | 0.7 | 7.3  | 1.3 | 0.4 | 1.1 | 0.83408 | 2050.6 | 19.5 | 2152.5 | 11.9 | 2251.2 | 12.7 | 8.9  |
| Spot 204 | 310914   | 290008   | 15887.1   | 1.6  | 7.2 | 1.1 | 7.3  | 1.5 | 0.4 | 1.1 | 0.70451 | 2107.6 | 19.6 | 2149.7 | 13.8 | 2190.1 | 19.1 | 3.8  |
| Spot 205 | 2593619  | 2419217  | 108004.7  | 1.3  | 8.6 | 0.5 | 5.4  | 1.0 | 0.3 | 0.9 | 0.86025 | 1867.6 | 14.4 | 1884.8 | 8.9  | 1903.7 | 9.5  | 1.9  |
| Spot 206 | 1476222  | 1376956  | 90362.8   | 2.0  | 8.5 | 0.5 | 5.4  | 1.0 | 0.3 | 0.9 | 0.85564 | 1859.7 | 14.0 | 1887.0 | 8.7  | 1917.1 | 9.4  | 3.0  |
| Spot 207 | 514516   | 479919   | 67458.5   | 1.7  | 5.4 | 0.6 | 13.4 | 0.9 | 0.5 | 0.7 | 0.74250 | 2729.5 | 14.9 | 2711.5 | 8.5  | 2698.1 | 10.0 | -1.2 |
| Spot 208 | 1989445  | 1855669  | 48203.0   | 1.7  | 8.4 | 0.6 | 5.5  | 1.1 | 0.3 | 0.9 | 0.84806 | 1881.9 | 14.6 | 1903.1 | 9.0  | 1926.2 | 10.0 | 2.3  |
| Spot 209 | 1627753  | 1518299  | 384927.1  | 1.9  | 8.6 | 0.5 | 5.6  | 1.0 | 0.3 | 0.8 | 0.84917 | 1928.9 | 13.5 | 1911.5 | 8.2  | 1892.6 | 9.0  | -1.9 |
| Spot 210 | 1106683  | 1032266  | 123799.3  | 1.9  | 7.8 | 0.6 | 6.6  | 1.1 | 0.4 | 0.9 | 0.81915 | 2052.7 | 16.0 | 2060.9 | 9.8  | 2069.2 | 11.2 | 0.8  |
| Spot 211 | 1387057  | 1293788  | 24322.2   | 1.1  | 7.9 | 0.5 | 6.0  | 0.8 | 0.3 | 0.6 | 0.78185 | 1921.5 | 10.2 | 1975.7 | 6.8  | 2033.0 | 8.6  | 5.5  |
| Spot 212 | 2051040  | 1913122  | 362385.0  | 4.5  | 4.7 | 0.5 | 17.2 | 0.9 | 0.6 | 0.8 | 0.86357 | 2954.9 | 18.6 | 2945.9 | 8.7  | 2939.8 | 7.4  | -0.5 |
| Spot 213 | 538577   | 502362   | 96324.6   | 2.3  | 6.1 | 0.6 | 11.0 | 1.2 | 0.5 | 1.1 | 0.88706 | 2558.7 | 22.6 | 2518.9 | 11.2 | 2487.0 | 9.4  | -2.9 |
| Spot 214 | 2708138  | 2526035  | 580874.7  | 1.9  | 5.5 | 0.6 | 12.8 | 1.0 | 0.5 | 0.8 | 0.82585 | 2651.6 | 18.0 | 2666.5 | 9.5  | 2677.8 | 9.4  | 1.0  |
| Spot 215 | 930150   | 867604   | 145329.9  | 1.6  | 7.1 | 0.5 | 8.2  | 0.9 | 0.4 | 0.7 | 0.83201 | 2262.6 | 14.3 | 2254.8 | 8.1  | 2247.8 | 8.6  | -0.7 |
| Spot 216 | 989810   | 923253   | 71554.1   | 2.3  | 5.5 | 0.4 | 13.0 | 0.9 | 0.5 | 0.8 | 0.87809 | 2688.3 | 18.2 | 2681.0 | 8.9  | 2675.5 | 7.5  | -0.5 |
| Spot 217 | 2731196  | 2547543  | 109452.2  | 1.3  | 8.6 | 0.7 | 5.5  | 1.4 | 0.3 | 1.2 | 0.87439 | 1902.5 | 20.1 | 1899.5 | 12.0 | 1896.2 | 12.2 | -0.3 |
| Spot 218 | 1886289  | 1759449  | 86111.8   | 1.3  | 8.3 | 0.7 | 5.6  | 1.1 | 0.3 | 0.8 | 0.76734 | 1896.3 | 13.8 | 1922.4 | 9.5  | 1950.8 | 12.6 | 2.8  |
| Spot 219 | 16026444 | 14948780 | 8108.2    | 10.1 | 7.2 | 1.8 | 7.4  | 2.1 | 0.4 | 1.2 | 0.56067 | 2126.8 | 21.6 | 2162.7 | 19.1 | 2197.0 | 30.6 | 3.2  |
| Spot 220 | 2400622  | 2239197  | 35295.6   | 0.9  | 8.4 | 0.5 | 5.7  | 0.9 | 0.3 | 0.8 | 0.83502 | 1927.4 | 12.7 | 1926.9 | 7.9  | 1926.3 | 9.0  | -0.1 |
| Spot 221 | 2245996  | 2094969  | 133024.8  | 1.3  | 7.9 | 0.5 | 6.6  | 1.0 | 0.4 | 0.8 | 0.83194 | 2067.9 | 14.0 | 2055.5 | 8.4  | 2043.1 | 9.3  | -1.2 |
| Spot 222 | 717704   | 669444   | 46204.8   | 1.3  | 5.5 | 0.7 | 12.6 | 1.1 | 0.5 | 0.9 | 0.79316 | 2620.4 | 18.8 | 2647.4 | 10.3 | 2668.1 | 11.1 | 1.8  |
| Spot 223 | 1687702  | 1574216  | 91996.9   | 3.5  | 8.5 | 0.6 | 5.6  | 1.0 | 0.3 | 0.8 | 0.80125 | 1924.6 | 14.0 | 1919.0 | 9.0  | 1912.9 | 11.3 | -0.6 |
| Spot 224 | 1098220  | 1024372  | 49779.6   | 1.1  | 8.3 | 0.8 | 5.9  | 1.1 | 0.4 | 0.7 | 0.68122 | 1974.9 | 12.7 | 1967.4 | 9.5  | 1959.5 | 14.3 | -0.8 |
| Spot 225 | 867749   | 809399   | 100260.7  | 1.3  | 8.6 | 0.7 | 5.5  | 1.1 | 0.3 | 0.9 | 0.80984 | 1893.8 | 15.2 | 1898.2 | 9.8  | 1903.1 | 12.1 | 0.5  |
| Spot 226 | 2818390  | 2628873  | 72195.7   | 1.4  | 8.5 | 0.6 | 5.6  | 1.2 | 0.3 | 1.0 | 0.85168 | 1906.3 | 16.5 | 1912.0 | 10.1 | 1918.2 | 11.0 | 0.6  |

|          |         |         |          |     |     |     |      |     |     |     |         |        |      |        |      |        |      |      |
|----------|---------|---------|----------|-----|-----|-----|------|-----|-----|-----|---------|--------|------|--------|------|--------|------|------|
| Spot 227 | 2186955 | 2039898 | 764080.1 | 1.2 | 8.7 | 0.4 | 5.4  | 1.0 | 0.3 | 1.0 | 0.92952 | 1899.4 | 15.7 | 1890.8 | 8.8  | 1881.4 | 6.8  | -1.0 |
| Spot 228 | 2834231 | 2643649 | 85747.6  | 2.0 | 7.7 | 0.6 | 6.9  | 1.0 | 0.4 | 0.8 | 0.83040 | 2100.3 | 15.1 | 2100.4 | 9.0  | 2100.5 | 9.9  | 0.0  |
| Spot 229 | 1419215 | 1323783 | 868955.5 | 2.2 | 5.5 | 0.6 | 13.0 | 1.1 | 0.5 | 0.9 | 0.84169 | 2692.9 | 20.4 | 2680.1 | 10.4 | 2670.4 | 9.9  | -0.8 |
| Spot 230 | 1491443 | 1391154 | 101389.7 | 2.4 | 7.6 | 0.6 | 7.2  | 0.8 | 0.4 | 0.6 | 0.69397 | 2141.6 | 10.6 | 2133.9 | 7.5  | 2126.6 | 10.6 | -0.7 |
| Spot 231 | 782957  | 730309  | 19415.9  | 1.7 | 7.8 | 0.9 | 6.6  | 1.5 | 0.4 | 1.2 | 0.78975 | 2062.9 | 21.3 | 2064.7 | 13.5 | 2066.5 | 16.5 | 0.2  |
| Spot 232 | 1663065 | 1551236 | 89575.0  | 1.2 | 7.4 | 0.5 | 7.4  | 0.9 | 0.4 | 0.7 | 0.83996 | 2176.0 | 13.4 | 2164.4 | 7.7  | 2153.5 | 8.2  | -1.0 |
| Spot 233 | 1054845 | 983914  | 331088.8 | 1.7 | 7.5 | 0.6 | 7.3  | 0.8 | 0.4 | 0.6 | 0.70836 | 2150.5 | 11.0 | 2147.7 | 7.6  | 2144.9 | 10.5 | -0.3 |
| Spot 234 | 634450  | 591788  | 49011.1  | 1.3 | 7.1 | 0.8 | 7.9  | 1.2 | 0.4 | 0.9 | 0.74904 | 2191.0 | 17.0 | 2218.3 | 11.0 | 2243.5 | 14.0 | 2.3  |
| Spot 235 | 1810018 | 1688307 | 43721.0  | 1.4 | 8.3 | 0.6 | 5.8  | 0.8 | 0.4 | 0.6 | 0.73506 | 1948.5 | 10.1 | 1953.3 | 7.1  | 1958.4 | 9.9  | 0.5  |
| Spot 236 | 646662  | 603179  | 216210.5 | 2.4 | 7.5 | 0.7 | 7.4  | 1.1 | 0.4 | 0.8 | 0.74587 | 2188.8 | 14.7 | 2157.8 | 9.5  | 2128.3 | 12.4 | -2.8 |
| Spot 237 | 856534  | 798938  | 71876.0  | 1.7 | 7.3 | 0.6 | 7.7  | 1.0 | 0.4 | 0.8 | 0.77551 | 2197.8 | 14.5 | 2193.7 | 9.0  | 2189.9 | 11.0 | -0.4 |
| Spot 238 | 1245750 | 1161982 | 685322.2 | 3.4 | 7.5 | 0.5 | 7.4  | 1.1 | 0.4 | 0.9 | 0.87779 | 2181.8 | 17.1 | 2161.1 | 9.4  | 2141.6 | 8.8  | -1.9 |
| Spot 239 | 2103827 | 1962359 | 283322.2 | 1.1 | 7.7 | 0.6 | 6.9  | 1.0 | 0.4 | 0.8 | 0.80749 | 2121.5 | 14.1 | 2104.6 | 8.6  | 2088.1 | 10.0 | -1.6 |
| Spot 240 | 782300  | 729696  | 180556.7 | 3.4 | 7.6 | 0.5 | 7.1  | 0.9 | 0.4 | 0.7 | 0.81949 | 2128.0 | 13.5 | 2122.6 | 8.1  | 2117.3 | 9.2  | -0.5 |
| Spot 241 | 543298  | 506765  | 42266.8  | 1.8 | 7.2 | 0.5 | 8.1  | 0.8 | 0.4 | 0.7 | 0.80464 | 2283.4 | 12.9 | 2245.8 | 7.6  | 2211.7 | 8.6  | -3.2 |
| Spot 242 | 2876538 | 2683111 | 90971.2  | 1.3 | 8.2 | 0.4 | 5.8  | 1.0 | 0.3 | 1.0 | 0.92624 | 1913.8 | 15.9 | 1944.2 | 9.0  | 1976.8 | 7.0  | 3.2  |
| Spot 243 | 1784725 | 1664715 | 217693.7 | 3.0 | 7.5 | 0.6 | 7.1  | 1.0 | 0.4 | 0.8 | 0.82824 | 2106.0 | 14.7 | 2127.4 | 8.8  | 2148.0 | 9.6  | 2.0  |
| Spot 244 | 789496  | 736408  | 90297.1  | 1.6 | 7.5 | 0.6 | 7.4  | 0.9 | 0.4 | 0.7 | 0.75877 | 2177.2 | 12.4 | 2156.7 | 7.9  | 2137.1 | 10.1 | -1.9 |
| Spot 245 | 2079629 | 1939789 | 158616.6 | 2.5 | 8.4 | 0.6 | 5.9  | 1.0 | 0.4 | 0.9 | 0.84804 | 1984.2 | 15.2 | 1964.6 | 9.1  | 1944.0 | 9.9  | -2.1 |
| Spot 246 | 1999249 | 1864814 | 73746.4  | 1.7 | 8.2 | 0.7 | 5.6  | 1.4 | 0.3 | 1.2 | 0.86468 | 1872.6 | 19.5 | 1922.4 | 11.9 | 1976.5 | 12.4 | 5.3  |
| Spot 247 | 1043566 | 973394  | 58630.2  | 2.2 | 6.3 | 0.5 | 10.1 | 0.9 | 0.5 | 0.7 | 0.79541 | 2440.8 | 14.6 | 2443.9 | 8.3  | 2446.5 | 9.3  | 0.2  |
| Spot 248 | 2542070 | 2371134 | 38497.4  | 3.4 | 7.2 | 0.7 | 6.9  | 1.0 | 0.4 | 0.8 | 0.73853 | 2004.5 | 13.4 | 2100.3 | 9.3  | 2195.6 | 12.3 | 8.7  |
| Spot 249 | 2123768 | 1980960 | 193502.8 | 2.6 | 8.6 | 0.7 | 5.5  | 1.2 | 0.3 | 1.0 | 0.81588 | 1903.8 | 16.3 | 1897.7 | 10.4 | 1890.9 | 12.6 | -0.7 |
| Spot 250 | 2906227 | 2710804 | 195120.9 | 1.5 | 8.6 | 0.6 | 5.4  | 1.3 | 0.3 | 1.1 | 0.88883 | 1867.6 | 18.4 | 1879.3 | 10.9 | 1892.3 | 10.5 | 1.3  |
| Spot 251 | 3298892 | 3077066 | 23741.1  | 1.3 | 8.0 | 0.5 | 5.3  | 1.1 | 0.3 | 0.9 | 0.85624 | 1732.3 | 13.8 | 1867.3 | 9.1  | 2021.1 | 9.7  | 14.3 |
| Spot 252 | 1691007 | 1577298 | 25747.0  | 1.7 | 8.4 | 0.7 | 5.7  | 1.1 | 0.3 | 0.8 | 0.72145 | 1914.0 | 12.8 | 1925.3 | 9.3  | 1937.4 | 13.3 | 1.2  |
| Spot 253 | 613439  | 572190  | 14618.0  | 1.0 | 6.7 | 1.1 | 8.4  | 1.3 | 0.4 | 0.7 | 0.53390 | 2217.3 | 13.2 | 2277.6 | 12.0 | 2332.2 | 19.1 | 4.9  |
| Spot 254 | 1598864 | 1491352 | 120065.2 | 0.6 | 8.3 | 0.5 | 6.0  | 0.8 | 0.4 | 0.6 | 0.81588 | 1977.3 | 10.9 | 1968.6 | 6.8  | 1959.5 | 8.1  | -0.9 |
| Spot 255 | 1957845 | 1826194 | 435865.1 | 1.6 | 7.6 | 0.8 | 7.1  | 1.7 | 0.4 | 1.5 | 0.88597 | 2122.9 | 27.2 | 2121.4 | 15.1 | 2119.9 | 13.8 | -0.1 |
| Spot 256 | 1014163 | 945967  | 15636.3  | 1.2 | 7.2 | 1.0 | 7.3  | 1.3 | 0.4 | 0.8 | 0.63241 | 2081.6 | 15.1 | 2144.8 | 12.0 | 2205.8 | 18.0 | 5.6  |
| Spot 257 | 1645307 | 1534672 | 123944.2 | 1.2 | 8.6 | 0.5 | 5.4  | 0.9 | 0.3 | 0.7 | 0.78288 | 1877.7 | 11.0 | 1880.5 | 7.4  | 1883.6 | 9.6  | 0.3  |
| Spot 258 | 1881332 | 1754826 | 352896.3 | 1.2 | 6.9 | 0.5 | 8.4  | 1.0 | 0.4 | 0.8 | 0.85798 | 2277.9 | 16.2 | 2275.3 | 8.9  | 2272.8 | 8.7  | -0.2 |
| Spot 259 | 1793759 | 1673142 | 95765.2  | 2.1 | 7.1 | 0.5 | 7.8  | 1.0 | 0.4 | 0.9 | 0.85718 | 2179.9 | 16.3 | 2206.6 | 9.3  | 2231.4 | 9.2  | 2.3  |
| Spot 260 | 1523977 | 1421500 | 9409.1   | 1.5 | 5.7 | 0.8 | 11.0 | 1.0 | 0.5 | 0.6 | 0.59671 | 2427.5 | 12.3 | 2523.8 | 9.4  | 2602.2 | 13.6 | 6.7  |
| Spot 261 | 1261866 | 1177014 | 276775.8 | 2.6 | 5.5 | 0.5 | 13.0 | 1.1 | 0.5 | 1.0 | 0.88918 | 2690.3 | 22.5 | 2681.0 | 10.8 | 2673.9 | 8.7  | -0.6 |
| Spot 262 | 2378832 | 2218872 | 170510.7 | 2.0 | 8.5 | 0.6 | 5.5  | 1.0 | 0.3 | 0.8 | 0.77955 | 1911.0 | 12.8 | 1907.6 | 8.6  | 1903.8 | 11.2 | -0.4 |
| Spot 264 | 749783  | 699365  | 103770.1 | 1.0 | 6.7 | 0.6 | 8.9  | 1.0 | 0.4 | 0.8 | 0.80440 | 2321.5 | 16.1 | 2326.9 | 9.4  | 2331.6 | 10.5 | 0.4  |
| Spot 265 | 2932224 | 2735053 | 10108.0  | 1.0 | 6.6 | 0.6 | 8.3  | 1.3 | 0.4 | 1.2 | 0.89545 | 2178.2 | 21.6 | 2268.4 | 11.8 | 2350.7 | 9.9  | 7.3  |
| Spot 266 | 2038223 | 1901167 | 192265.0 | 1.4 | 7.8 | 0.5 | 6.8  | 0.8 | 0.4 | 0.6 | 0.72758 | 2099.5 | 10.2 | 2081.2 | 6.9  | 2063.2 | 9.4  | -1.8 |
| Spot 267 | 1189259 | 1109290 | 403545.2 | 2.8 | 7.4 | 0.6 | 7.3  | 0.9 | 0.4 | 0.8 | 0.80333 | 2156.3 | 13.9 | 2152.0 | 8.4  | 2147.9 | 9.8  | -0.4 |
| Spot 268 | 843735  | 787000  | 107146.7 | 0.9 | 7.6 | 0.7 | 7.2  | 1.1 | 0.4 | 0.8 | 0.73444 | 2166.1 | 14.4 | 2134.5 | 9.5  | 2104.3 | 12.7 | -2.9 |
| Spot 269 | 1876847 | 1750643 | 625460.7 | 2.0 | 5.6 | 0.5 | 12.6 | 0.9 | 0.5 | 0.7 | 0.80752 | 2663.3 | 16.4 | 2650.8 | 8.7  | 2641.4 | 9.1  | -0.8 |
| Spot 270 | 868499  | 810098  | #####    | 2.1 | 7.6 | 0.7 | 7.3  | 1.0 | 0.4 | 0.7 | 0.70648 | 2171.6 | 13.6 | 2144.0 | 9.3  | 2117.7 | 13.0 | -2.5 |

|          |         |         |           |     |     |     |      |     |     |     |         |        |      |        |      |        |      |      |
|----------|---------|---------|-----------|-----|-----|-----|------|-----|-----|-----|---------|--------|------|--------|------|--------|------|------|
| Spot 271 | 1755264 | 1637235 | 204546.0  | 2.1 | 5.5 | 0.5 | 12.9 | 1.1 | 0.5 | 1.0 | 0.89070 | 2670.2 | 22.2 | 2669.6 | 10.7 | 2669.1 | 8.6  | 0.0  |
| Spot 272 | 2088504 | 1948067 | 942151.4  | 1.9 | 8.5 | 0.7 | 5.5  | 1.2 | 0.3 | 1.0 | 0.84687 | 1897.0 | 17.1 | 1904.3 | 10.6 | 1912.2 | 11.7 | 0.8  |
| Spot 273 | 1820523 | 1698106 | 157937.5  | 0.9 | 7.7 | 0.5 | 6.7  | 0.9 | 0.4 | 0.7 | 0.79369 | 2064.7 | 12.3 | 2074.1 | 7.7  | 2083.5 | 9.4  | 0.9  |
| Spot 274 | 219003  | 204277  | 24887.6   | 1.1 | 8.5 | 0.9 | 5.3  | 1.3 | 0.3 | 0.9 | 0.71860 | 1828.4 | 14.4 | 1861.4 | 10.7 | 1898.5 | 15.7 | 3.7  |
| Spot 275 | 1296435 | 1209259 | 36489.5   | 3.3 | 7.1 | 0.6 | 8.1  | 1.2 | 0.4 | 1.0 | 0.84815 | 2284.7 | 19.8 | 2246.5 | 11.0 | 2211.7 | 11.2 | -3.3 |
| Spot 276 | 202787  | 189151  | 15446.1   | 0.4 | 5.6 | 0.7 | 12.9 | 1.1 | 0.5 | 0.9 | 0.79397 | 2731.1 | 20.1 | 2675.0 | 10.7 | 2632.8 | 11.5 | -3.7 |
| Spot 277 | 2377814 | 2217923 | 259892.7  | 2.5 | 5.5 | 0.6 | 13.1 | 1.0 | 0.5 | 0.8 | 0.81005 | 2718.4 | 18.2 | 2690.1 | 9.5  | 2668.9 | 9.8  | -1.9 |
| Spot 278 | 2509662 | 2340905 | 12039.1   | 2.1 | 7.6 | 1.0 | 6.1  | 1.3 | 0.3 | 0.8 | 0.61711 | 1898.3 | 12.9 | 1988.0 | 11.1 | 2082.7 | 17.7 | 8.9  |
| Spot 279 | 1929305 | 1799573 | 103481.3  | 0.7 | 8.3 | 0.7 | 5.5  | 1.2 | 0.3 | 0.9 | 0.76876 | 1878.8 | 14.6 | 1907.2 | 10.0 | 1938.2 | 13.3 | 3.1  |
| Spot 280 | 522790  | 487636  | 86598.4   | 2.0 | 3.8 | 1.0 | 24.8 | 1.5 | 0.7 | 1.1 | 0.75073 | 3353.9 | 29.1 | 3299.8 | 14.5 | 3267.2 | 15.4 | -2.7 |
| Spot 281 | 1603089 | 1495293 | 1167701.8 | 2.6 | 5.5 | 0.6 | 13.0 | 1.2 | 0.5 | 1.0 | 0.87083 | 2691.3 | 22.5 | 2678.2 | 11.1 | 2668.3 | 9.6  | -0.9 |
| Spot 282 | 2050676 | 1912783 | 651684.3  | 1.8 | 5.4 | 0.5 | 12.7 | 0.9 | 0.5 | 0.8 | 0.85005 | 2640.1 | 17.1 | 2658.8 | 8.7  | 2673.1 | 8.1  | 1.2  |
| Spot 283 | 1113487 | 1038613 | 53667.1   | 1.0 | 5.6 | 0.6 | 12.1 | 1.0 | 0.5 | 0.9 | 0.83945 | 2621.1 | 19.0 | 2615.9 | 9.8  | 2611.8 | 9.5  | -0.4 |
| Spot 284 | 1532059 | 1429039 | 82817.7   | 1.5 | 7.6 | 0.6 | 7.1  | 1.1 | 0.4 | 0.9 | 0.82633 | 2151.5 | 17.2 | 2125.4 | 10.1 | 2100.2 | 11.2 | -2.4 |
| Spot 285 | 3359138 | 3133260 | 246745.3  | 4.7 | 6.3 | 0.6 | 9.7  | 1.3 | 0.4 | 1.1 | 0.88585 | 2389.3 | 22.1 | 2408.3 | 11.5 | 2424.4 | 9.9  | 1.4  |
| Spot 286 | 1583401 | 1476929 | 42816.6   | 1.6 | 7.4 | 0.5 | 7.2  | 0.9 | 0.4 | 0.8 | 0.81527 | 2150.7 | 14.0 | 2142.7 | 8.4  | 2135.0 | 9.5  | -0.7 |
| Spot 287 | 957862  | 893453  | 90126.0   | 2.4 | 7.4 | 0.5 | 7.2  | 1.0 | 0.4 | 0.9 | 0.87025 | 2127.2 | 15.5 | 2135.6 | 8.8  | 2143.7 | 8.5  | 0.8  |
| Spot 288 | 381130  | 355501  | 177639.7  | 2.7 | 6.5 | 0.7 | 9.7  | 1.2 | 0.5 | 1.0 | 0.84479 | 2427.1 | 21.0 | 2404.7 | 11.3 | 2385.8 | 11.2 | -1.7 |
| Spot 289 | 3855257 | 3596018 | 211266.6  | 3.1 | 5.5 | 0.7 | 13.0 | 1.2 | 0.5 | 1.0 | 0.82627 | 2698.1 | 21.6 | 2677.4 | 11.2 | 2661.8 | 11.1 | -1.4 |
| Spot 291 | 1045404 | 975108  | 89704.0   | 3.4 | 7.5 | 0.5 | 7.2  | 1.0 | 0.4 | 0.9 | 0.85088 | 2131.0 | 15.7 | 2132.8 | 9.1  | 2134.6 | 9.4  | 0.2  |
| Spot 292 | 2319487 | 2163518 | 20880.6   | 5.0 | 5.5 | 0.5 | 11.5 | 1.0 | 0.5 | 0.9 | 0.87571 | 2457.0 | 18.2 | 2568.1 | 9.5  | 2657.0 | 8.2  | 7.5  |
| Spot 293 | 1044687 | 974439  | 199951.9  | 1.9 | 5.8 | 0.6 | 11.4 | 1.2 | 0.5 | 1.1 | 0.87461 | 2558.5 | 22.3 | 2558.6 | 11.3 | 2558.7 | 9.8  | 0.0  |
| Spot 294 | 2729840 | 2546278 | 422392.5  | 2.2 | 5.0 | 0.5 | 15.2 | 1.1 | 0.6 | 1.0 | 0.88298 | 2844.2 | 22.7 | 2825.4 | 10.6 | 2812.0 | 8.6  | -1.1 |
| Spot 295 | 1260632 | 1175864 | 7204.3    | 2.0 | 5.6 | 1.1 | 10.9 | 1.4 | 0.4 | 0.8 | 0.56979 | 2377.5 | 15.8 | 2510.6 | 12.9 | 2620.0 | 19.0 | 9.3  |
| Spot 296 | 396540  | 369875  | 111731.0  | 0.5 | 7.6 | 0.7 | 7.1  | 1.1 | 0.4 | 0.9 | 0.78564 | 2145.8 | 16.2 | 2118.6 | 10.1 | 2092.2 | 12.3 | -2.6 |
| Spot 297 | 1445771 | 1348553 | 714972.2  | 1.3 | 7.2 | 0.7 | 7.7  | 1.1 | 0.4 | 0.9 | 0.80285 | 2189.0 | 16.9 | 2194.6 | 10.2 | 2199.8 | 11.8 | 0.5  |
| Spot 298 | 722053  | 673500  | 117618.5  | 3.1 | 7.4 | 0.6 | 7.4  | 1.1 | 0.4 | 0.9 | 0.84052 | 2173.3 | 16.9 | 2164.1 | 9.7  | 2155.5 | 10.3 | -0.8 |
| Spot 299 | 798923  | 745201  | 580283.8  | 2.8 | 7.5 | 0.6 | 7.1  | 0.9 | 0.4 | 0.7 | 0.75391 | 2121.9 | 11.8 | 2118.6 | 7.7  | 2115.3 | 10.0 | -0.3 |
| Spot 300 | 2603664 | 2428587 | 317001.4  | 2.2 | 5.5 | 0.5 | 13.1 | 1.1 | 0.5 | 1.0 | 0.89122 | 2728.7 | 22.0 | 2684.2 | 10.5 | 2650.9 | 8.4  | -2.9 |
| Spot 301 | 3344999 | 3120071 | 1977041.7 | 1.6 | 5.5 | 0.4 | 12.6 | 0.9 | 0.5 | 0.8 | 0.86900 | 2661.3 | 16.6 | 2651.5 | 8.3  | 2644.1 | 7.2  | -0.6 |
| Spot 302 | 1229086 | 1146439 | 117875.8  | 1.7 | 7.6 | 0.6 | 6.9  | 1.0 | 0.4 | 0.8 | 0.76175 | 2110.7 | 13.6 | 2101.1 | 8.8  | 2091.6 | 11.3 | -0.9 |
| Spot 303 | 2268622 | 2116074 | 1744640.9 | 2.0 | 7.2 | 0.6 | 7.7  | 1.5 | 0.4 | 1.4 | 0.92142 | 2207.1 | 26.3 | 2199.3 | 13.7 | 2192.0 | 10.3 | -0.7 |
| Spot 304 | 2165867 | 2020228 | 89769.8   | 1.3 | 8.5 | 0.5 | 5.3  | 1.0 | 0.3 | 0.9 | 0.84741 | 1862.9 | 13.8 | 1876.8 | 8.6  | 1892.3 | 9.6  | 1.6  |
| Spot 305 | 1471928 | 1372951 | 145365.5  | 2.6 | 8.6 | 0.5 | 5.5  | 1.1 | 0.3 | 1.0 | 0.88914 | 1921.2 | 16.9 | 1896.5 | 9.8  | 1869.6 | 9.4  | -2.8 |
| Spot 306 | 803858  | 749804  | 71950.6   | 1.8 | 7.5 | 0.6 | 7.3  | 1.1 | 0.4 | 0.9 | 0.81761 | 2174.5 | 16.1 | 2143.1 | 9.5  | 2113.1 | 10.8 | -2.9 |
| Spot 307 | 894617  | 834460  | 104053.3  | 1.5 | 7.3 | 0.7 | 7.6  | 1.0 | 0.4 | 0.7 | 0.71685 | 2201.2 | 13.0 | 2180.4 | 8.7  | 2161.0 | 11.9 | -1.9 |
| Spot 308 | 882934  | 823563  | 86004.0   | 2.8 | 7.5 | 0.6 | 7.3  | 1.0 | 0.4 | 0.8 | 0.81545 | 2182.2 | 15.0 | 2153.6 | 8.9  | 2126.5 | 10.1 | -2.6 |
| Spot 309 | 1666525 | 1554463 | 104976.5  | 0.5 | 8.3 | 0.5 | 5.9  | 0.9 | 0.4 | 0.8 | 0.84866 | 1976.0 | 13.5 | 1964.2 | 8.1  | 1951.8 | 8.8  | -1.2 |
| Spot 311 | 2426416 | 2263257 | 155657.8  | 1.6 | 6.3 | 0.8 | 9.5  | 1.2 | 0.4 | 0.8 | 0.69541 | 2343.4 | 16.1 | 2387.4 | 10.8 | 2425.1 | 14.4 | 3.4  |
| Spot 312 | 1429656 | 1333522 | 102313.9  | 2.3 | 5.4 | 0.5 | 13.2 | 1.0 | 0.5 | 0.8 | 0.84712 | 2729.7 | 18.3 | 2696.0 | 9.2  | 2670.8 | 8.5  | -2.2 |
| Spot 313 | 3562485 | 3322934 | 7467.0    | 3.1 | 7.1 | 1.1 | 6.2  | 1.8 | 0.3 | 1.4 | 0.78137 | 1834.1 | 21.8 | 2010.9 | 15.3 | 2197.7 | 19.0 | 16.5 |
| Spot 314 | 1531367 | 1428393 | 253871.5  | 3.7 | 7.6 | 0.7 | 6.9  | 1.1 | 0.4 | 0.9 | 0.78712 | 2076.8 | 15.4 | 2093.0 | 9.8  | 2109.0 | 12.0 | 1.5  |
| Spot 315 | 2331037 | 2174292 | 11436.0   | 1.4 | 6.5 | 0.8 | 7.5  | 1.2 | 0.4 | 1.0 | 0.77802 | 1983.3 | 16.6 | 2168.1 | 11.2 | 2347.9 | 13.4 | 15.5 |

**Run 3 (discordant)**

|          |          |          |          |      |     |     |     |     |     |     |         |        |      |        |      |        |      |      |
|----------|----------|----------|----------|------|-----|-----|-----|-----|-----|-----|---------|--------|------|--------|------|--------|------|------|
| Spot 124 | 10235707 | 9547429  | 4559.7   | 1.8  | 6.8 | 1.7 | 6.7 | 2.9 | 0.3 | 2.4 | 0.81320 | 1827.3 | 37.7 | 2067.2 | 25.7 | 2315.6 | 29.1 | 21.1 |
| Spot 14  | 1601320  | 1493643  | 150958.7 | 1.5  | 7.4 | 0.6 | 5.7 | 1.5 | 0.3 | 1.4 | 0.91572 | 1712.4 | 20.3 | 1924.3 | 12.7 | 2161.0 | 10.4 | 20.8 |
| Spot 159 | 3121703  | 2911791  | 6762.6   | 2.2  | 7.4 | 1.9 | 5.0 | 2.9 | 0.3 | 2.3 | 0.76618 | 1547.8 | 31.0 | 1827.2 | 24.9 | 2162.5 | 32.9 | 28.4 |
| Spot 161 | 27273676 | 25439717 | 73211.9  | 10.6 | 9.3 | 0.6 | 3.5 | 1.0 | 0.2 | 0.8 | 0.79480 | 1351.0 | 9.3  | 1520.7 | 7.5  | 1765.7 | 10.6 | 23.5 |
| Spot 290 | 1733811  | 1617225  | 24243.5  | 1.0  | 8.2 | 0.8 | 4.6 | 2.5 | 0.3 | 2.4 | 0.95313 | 1552.8 | 33.3 | 1747.4 | 21.1 | 1988.9 | 13.6 | 21.9 |
| Spot 310 | 3260314  | 3041081  | 6646.9   | 1.6  | 7.3 | 0.7 | 5.7 | 1.3 | 0.3 | 1.1 | 0.82161 | 1700.2 | 16.1 | 1933.8 | 11.3 | 2194.3 | 13.0 | 22.5 |
| Spot 70  | 1175640  | 1096587  | 63627.2  | 1.7  | 8.6 | 0.6 | 5.8 | 1.1 | 0.4 | 0.9 | 0.85414 | 2001.8 | 15.7 | 1950.9 | 9.3  | 1897.3 | 10.0 | -5.5 |

**TABLE S19: RORA MED (CA) LA-ICPMS U-Pb ZIRCON GEOCHRONOLOGY**

| Zircon<br>#              | Composition    |                       |                 |       |                        |                |           |                       |                |                | Ages       |                |            |                 |            |        | % Disc. |      |
|--------------------------|----------------|-----------------------|-----------------|-------|------------------------|----------------|-----------|-----------------------|----------------|----------------|------------|----------------|------------|-----------------|------------|--------|---------|------|
|                          | U<br>(238 cps) | U (norm)<br>(238 cps) | 206Pb/<br>204Pb | U/Th  | 206Pb/ 1σ<br>207Pb (%) | 207Pb/<br>235U | 1σ<br>(%) | 206Pb/ 1σ<br>238U (%) | Error<br>Corr. | 206Pb/<br>238U | 1σ<br>(Ma) | 207Pb/<br>235U | 1σ<br>(Ma) | 206Pb/<br>207Pb | 1σ<br>(Ma) |        |         |      |
| <i>Run 1 (Sept 2021)</i> |                |                       |                 |       |                        |                |           |                       |                |                |            |                |            |                 |            |        |         |      |
| Spot 2                   | 239673         | 302956                | 10963.2         | 0.776 | 4.2                    | 1.2            | 20.1      | 2.4                   | 0.6            | 2.06           | 0.86866    | 3029.2         | 49.7       | 3096.0          | 22.9       | 3139.6 | 19      | 3.5  |
| Spot 3                   | 1460885        | 1846616               | 47780.6         | 1.383 | 7.8                    | 1.0            | 7.0       | 1.6                   | 0.4            | 1.28           | 0.78575    | 2125.9         | 23.2       | 2108.7          | 14.5       | 2091.9 | 18      | -1.6 |
| Spot 4                   | 671762         | 849133                | 32009.2         | 1.869 | 7.3                    | 0.8            | 8.1       | 1.3                   | 0.4            | 1.08           | 0.80459    | 2259.7         | 20.5       | 2237.2          | 12.1       | 2216.6 | 14      | -1.9 |
| Spot 5                   | 778502         | 984056                | 12228.3         | 2.097 | 7.3                    | 0.9            | 7.4       | 1.7                   | 0.4            | 1.47           | 0.86187    | 2119.3         | 26.5       | 2159.6          | 15.2       | 2198.1 | 15      | 3.6  |
| Spot 6                   | 637585         | 805933                | 6920.9          | 2.178 | 5.5                    | 0.8            | 13.1      | 1.4                   | 0.5            | 1.14           | 0.82069    | 2682.0         | 25.0       | 2685.4          | 13.1       | 2687.9 | 13      | 0.2  |
| Spot 7                   | 527235         | 666445                | 10770.0         | 2.438 | 5.4                    | 0.7            | 13.2      | 1.5                   | 0.5            | 1.30           | 0.87628    | 2668.0         | 28.3       | 2694.8          | 14.0       | 2714.9 | 12      | 1.7  |
| Spot 8                   | 391644         | 495053                | 7498.6          | 4.468 | 7.5                    | 1.0            | 7.1       | 2.1                   | 0.4            | 1.72           | 0.81560    | 2119.6         | 31.0       | 2128.0          | 18.7       | 2136.1 | 21      | 0.8  |
| Spot 10                  | 821730         | 1038699               | 20259.1         | 2.807 | 7.5                    | 0.7            | 7.6       | 1.3                   | 0.4            | 1.08           | 0.84288    | 2202.3         | 20.2       | 2183.2          | 11.5       | 2165.2 | 12      | -1.7 |
| Spot 11                  | 712695         | 900874                | 32526.0         | 1.186 | 7.7                    | 0.8            | 6.9       | 1.4                   | 0.4            | 1.17           | 0.83681    | 2082.4         | 20.8       | 2099.0          | 12.4       | 2115.2 | 13      | 1.5  |
| Spot 12                  | 242439         | 306452                | 8342.3          | 1.496 | 7.7                    | 1.2            | 6.7       | 2.0                   | 0.4            | 1.47           | 0.75214    | 2019.6         | 25.5       | 2066.3          | 17.3       | 2113.2 | 23      | 4.4  |
| Spot 13                  | 1393157        | 1761005               | 38743.0         | 2.089 | 5.5                    | 0.8            | 13.6      | 1.5                   | 0.5            | 1.27           | 0.84060    | 2741.8         | 28.3       | 2722.7          | 14.3       | 2708.6 | 13      | -1.2 |
| Spot 15                  | 1672097        | 2113596               | 50228.3         | 3.093 | 5.0                    | 0.8            | 16.1      | 1.6                   | 0.6            | 1.32           | 0.84284    | 2911.4         | 30.9       | 2882.5          | 15.0       | 2862.4 | 14      | -1.7 |
| Spot 16                  | 1173381        | 1483199               | 28606.7         | 2.260 | 5.5                    | 0.7            | 13.5      | 1.1                   | 0.5            | 0.89           | 0.79362    | 2735.3         | 19.8       | 2713.4          | 10.6       | 2697.1 | 11      | -1.4 |
| Spot 17                  | 969733         | 1225781               | 19070.5         | 1.073 | 5.3                    | 0.7            | 12.9      | 2.9                   | 0.5            | 2.79           | 0.96669    | 2573.6         | 59.3       | 2669.3          | 27.2       | 2742.6 | 12      | 6.2  |
| Spot 18                  | 231227         | 292280                | 8742.2          | 2.524 | 7.1                    | 1.1            | 7.3       | 1.7                   | 0.4            | 1.24           | 0.73130    | 2052.7         | 21.9       | 2149.1          | 15.2       | 2242.5 | 20      | 8.5  |
| Spot 19                  | 880975         | 1113586               | 751003.6        | 1.015 | 5.7                    | 0.9            | 12.7      | 1.7                   | 0.5            | 1.40           | 0.84560    | 2662.2         | 30.6       | 2656.5          | 15.6       | 2652.2 | 15      | -0.4 |
| Spot 20                  | 850207         | 1074694               | 35814.9         | 2.117 | 5.5                    | 0.9            | 13.2      | 1.5                   | 0.5            | 1.17           | 0.79205    | 2694.1         | 25.8       | 2694.0          | 14.0       | 2693.8 | 15      | 0.0  |
| Spot 22                  | 364532         | 460782                | 29215.3         | 0.967 | 7.5                    | 1.2            | 7.0       | 1.6                   | 0.4            | 1.08           | 0.66779    | 2045.2         | 18.8       | 2105.6          | 14.3       | 2165.1 | 21      | 5.5  |
| Spot 23                  | 692344         | 875150                | 23762.5         | 1.053 | 7.5                    | 0.7            | 7.4       | 1.5                   | 0.4            | 1.26           | 0.85792    | 2158.4         | 23.1       | 2163.5          | 13.1       | 2168.3 | 13      | 0.5  |
| Spot 24                  | 1274813        | 1611413               | #####           | 1.911 | 3.6                    | 0.6            | 27.8      | 1.2                   | 0.7            | 1.08           | 0.86943    | 3469.8         | 29.1       | 3412.0          | 12.2       | 3378.3 | 10      | -2.7 |
| Spot 25                  | 483708         | 611426                | 98864.6         | 2.219 | 7.5                    | 0.8            | 7.2       | 1.2                   | 0.4            | 0.83           | 0.71761    | 2085.1         | 14.8       | 2134.7          | 10.3       | 2182.9 | 14      | 4.5  |
| Spot 27                  | 188997         | 238900                | 1226.6          | 3.123 | 7.5                    | 1.4            | 6.3       | 3.4                   | 0.4            | 3.07           | 0.90532    | 1997.6         | 52.8       | 2014.5          | 29.8       | 2031.8 | 26      | 1.7  |
| Spot 28                  | 887188         | 1121440               | 30154.8         | 2.547 | 7.5                    | 1.0            | 7.2       | 2.0                   | 0.4            | 1.78           | 0.86954    | 2104.2         | 32.0       | 2136.8          | 18.3       | 2168.4 | 18      | 3.0  |
| Spot 29                  | 360591         | 455801                | 10708.8         | 1.959 | 7.2                    | 0.9            | 7.5       | 1.5                   | 0.4            | 1.22           | 0.81247    | 2110.6         | 22.0       | 2168.0          | 13.5       | 2222.8 | 15      | 5.0  |
| Spot 31                  | 1017829        | 1286575               | 13771.8         | 2.463 | 5.4                    | 0.8            | 13.6      | 1.4                   | 0.5            | 1.16           | 0.83417    | 2731.4         | 25.8       | 2723.1          | 13.2       | 2717.0 | 13      | -0.5 |
| Spot 32                  | 1866766        | 2359664               | 105000.8        | 4.005 | 7.7                    | 0.8            | 7.0       | 1.2                   | 0.4            | 0.95           | 0.76608    | 2105.5         | 17.1       | 2115.2          | 11.1       | 2124.7 | 14      | 0.9  |
| Spot 33                  | 1034535        | 1307693               | 18718.3         | 1.480 | 7.8                    | 0.9            | 6.8       | 1.5                   | 0.4            | 1.18           | 0.80567    | 2064.3         | 20.8       | 2085.3          | 13.0       | 2106.2 | 15      | 2.0  |
| Spot 34                  | 1081517        | 1367079               | 52580.1         | 2.192 | 5.5                    | 0.8            | 13.8      | 1.4                   | 0.5            | 1.09           | 0.79727    | 2804.3         | 24.8       | 2738.4          | 12.9       | 2690.2 | 14      | -4.2 |
| Spot 35                  | 877646         | 1109379               | 20877.0         | 2.738 | 5.5                    | 0.9            | 13.0      | 1.5                   | 0.5            | 1.21           | 0.81058    | 2649.2         | 26.3       | 2679.1          | 14.1       | 2701.7 | 14      | 1.9  |
| Spot 36                  | 270136         | 341462                | 8711.3          | 1.887 | 5.5                    | 1.4            | 12.3      | 5.9                   | 0.5            | 5.69           | 0.97075    | 2560.5         | 120.1      | 2627.8          | 55.0       | 2680.0 | 23      | 4.5  |
| Spot 37                  | 1441224        | 1821762               | 42925.7         | 2.022 | 5.5                    | 0.9            | 13.5      | 1.5                   | 0.5            | 1.20           | 0.79714    | 2738.0         | 26.8       | 2712.2          | 14.2       | 2693.0 | 15      | -1.7 |
| Spot 38                  | 1899472        | 2401006               | 114434.3        | 2.379 | 5.6                    | 1.0            | 13.3      | 1.6                   | 0.5            | 1.25           | 0.79380    | 2741.0         | 27.8       | 2697.9          | 14.8       | 2665.8 | 16      | -2.8 |
| Spot 39                  | 255967         | 323552                | 7776.3          | 1.504 | 6.9                    | 1.7            | 8.1       | 2.3                   | 0.4            | 1.56           | 0.67055    | 2180.3         | 28.9       | 2241.1          | 21.0       | 2297.2 | 30      | 5.1  |
| Spot 40                  | 817913         | 1033874               | 31830.8         | 1.463 | 7.7                    | 1.0            | 7.2       | 1.9                   | 0.4            | 1.60           | 0.85371    | 2142.6         | 29.1       | 2131.1          | 16.7       | 2119.9 | 17      | -1.1 |
| Spot 41                  | 1594173        | 2015097               | 139053.8        | 2.065 | 5.7                    | 0.8            | 12.9      | 1.3                   | 0.5            | 1.05           | 0.77733    | 2725.5         | 23.3       | 2674.4          | 12.7       | 2636.0 | 14      | -3.4 |
| Spot 42                  | 667479         | 843719                | 82919.1         | 1.029 | 7.7                    | 0.9            | 7.2       | 1.5                   | 0.4            | 1.23           | 0.81105    | 2141.0         | 22.5       | 2132.5          | 13.6       | 2124.4 | 16      | -0.8 |
| Spot 43                  | 1032122        | 1304643               | 32431.9         | 1.766 | 8.7                    | 1.0            | 5.5       | 1.7                   | 0.3            | 1.36           | 0.80651    | 1909.9         | 22.4       | 1901.4          | 14.4       | 1892.1 | 18      | -0.9 |
| Spot 44                  | 733745         | 927482                | 11309.9         | 1.401 | 8.2                    | 1.0            | 6.1       | 1.5                   | 0.4            | 1.15           | 0.75291    | 1966.3         | 19.5       | 1984.0          | 13.3       | 2002.5 | 18      | 1.8  |

|         |         |         |          |       |     |     |      |     |     |      |         |        |      |        |      |        |    |      |
|---------|---------|---------|----------|-------|-----|-----|------|-----|-----|------|---------|--------|------|--------|------|--------|----|------|
| Spot 45 | 546077  | 690262  | 13167.7  | 2.761 | 6.9 | 1.0 | 8.6  | 1.8 | 0.4 | 1.45 | 0.81993 | 2272.9 | 27.8 | 2293.1 | 16.1 | 2311.1 | 17 | 1.7  |
| Spot 46 | 1774103 | 2242535 | 87070.6  | 1.696 | 4.1 | 0.6 | 22.2 | 1.5 | 0.7 | 1.40 | 0.90990 | 3242.7 | 35.8 | 3193.8 | 15.0 | 3163.3 | 10 | -2.5 |
| Spot 47 | 804788  | 1017283 | 148967.1 | 5.413 | 7.1 | 0.7 | 8.4  | 1.5 | 0.4 | 1.28 | 0.87520 | 2304.7 | 24.8 | 2279.0 | 13.3 | 2256.0 | 12 | -2.2 |
| Spot 48 | 655625  | 828736  | 39025.1  | 2.166 | 7.7 | 0.9 | 7.0  | 1.8 | 0.4 | 1.53 | 0.85944 | 2104.7 | 27.6 | 2107.8 | 15.9 | 2110.8 | 16 | 0.3  |
| Spot 49 | 119867  | 151516  | 6402.5   | 0.713 | 7.1 | 1.4 | 7.6  | 2.9 | 0.4 | 2.42 | 0.83784 | 2130.4 | 44.0 | 2189.7 | 26.0 | 2245.6 | 27 | 5.1  |
| Spot 50 | 278225  | 351687  | 21585.7  | 2.547 | 4.7 | 1.1 | 16.7 | 2.0 | 0.6 | 1.73 | 0.84849 | 2860.4 | 39.9 | 2916.0 | 19.5 | 2954.7 | 17 | 3.2  |
| Spot 51 | 801487  | 1013111 | 26079.9  | 1.098 | 7.5 | 0.8 | 7.3  | 1.4 | 0.4 | 1.17 | 0.83418 | 2132.6 | 21.3 | 2148.0 | 12.6 | 2162.7 | 14 | 1.4  |
| Spot 52 | 877876  | 1109669 | 88757.4  | 1.052 | 8.3 | 0.9 | 6.2  | 1.3 | 0.4 | 1.03 | 0.76749 | 2009.2 | 17.7 | 2000.4 | 11.7 | 1991.4 | 15 | -0.9 |
| Spot 53 | 711367  | 899195  | 56919.7  | 2.397 | 7.4 | 1.1 | 7.5  | 1.8 | 0.4 | 1.49 | 0.81708 | 2151.3 | 27.2 | 2171.3 | 16.3 | 2190.1 | 18 | 1.8  |
| Spot 54 | 687498  | 869024  | 18529.7  | 2.691 | 7.6 | 0.7 | 7.2  | 1.3 | 0.4 | 1.08 | 0.83789 | 2129.5 | 19.6 | 2138.8 | 11.5 | 2147.7 | 12 | 0.8  |
| Spot 55 | 903645  | 1142242 | 39805.9  | 2.321 | 5.6 | 0.9 | 13.6 | 1.5 | 0.5 | 1.20 | 0.81428 | 2788.2 | 27.2 | 2719.3 | 14.0 | 2668.5 | 14 | -4.5 |
| Spot 56 | 1301234 | 1644810 | 189936.0 | 1.246 | 8.6 | 0.9 | 5.5  | 1.6 | 0.3 | 1.40 | 0.84854 | 1878.7 | 22.8 | 1901.0 | 14.2 | 1925.5 | 16 | 2.4  |
| Spot 57 | 895315  | 1131712 | 50831.2  | 2.060 | 8.2 | 1.1 | 6.2  | 1.7 | 0.4 | 1.26 | 0.75295 | 2001.9 | 21.6 | 2003.5 | 14.6 | 2005.1 | 20 | 0.2  |
| Spot 58 | 179689  | 227133  | 5721.4   | 1.178 | 7.5 | 1.8 | 7.4  | 2.6 | 0.4 | 1.81 | 0.70862 | 2204.1 | 33.8 | 2165.3 | 22.9 | 2128.6 | 32 | -3.5 |
| Spot 59 | 754409  | 953602  | 63685.8  | 1.055 | 5.0 | 0.8 | 16.1 | 1.3 | 0.6 | 1.08 | 0.81502 | 2932.1 | 25.6 | 2879.9 | 12.7 | 2843.6 | 13 | -3.1 |
| Spot 60 | 353193  | 446450  | 18423.6  | 1.654 | 7.1 | 1.5 | 7.6  | 2.3 | 0.4 | 1.82 | 0.78036 | 2108.0 | 32.8 | 2181.4 | 20.9 | 2251.0 | 25 | 6.4  |
| Spot 61 | 964469  | 1219126 | 729974.6 | 2.709 | 7.6 | 1.0 | 7.4  | 1.5 | 0.4 | 1.16 | 0.76079 | 2163.7 | 21.4 | 2158.2 | 13.7 | 2152.9 | 17 | -0.5 |
| Spot 62 | 886175  | 1120159 | 48205.7  | 2.595 | 5.5 | 0.6 | 13.5 | 1.5 | 0.5 | 1.31 | 0.90228 | 2756.1 | 29.5 | 2716.2 | 13.8 | 2686.6 | 10 | -2.6 |
| Spot 63 | 654352  | 827127  | 8102.3   | 0.975 | 5.4 | 0.9 | 13.5 | 1.4 | 0.5 | 1.13 | 0.79608 | 2723.7 | 25.2 | 2713.2 | 13.5 | 2705.4 | 14 | -0.7 |
| Spot 64 | 1061372 | 1341615 | 23953.0  | 2.042 | 5.5 | 0.7 | 13.9 | 1.5 | 0.5 | 1.29 | 0.87058 | 2804.7 | 29.3 | 2745.0 | 14.0 | 2701.4 | 12 | -3.8 |
| Spot 65 | 958715  | 1211853 | 10253.7  | 1.467 | 8.9 | 1.4 | 5.4  | 2.4 | 0.3 | 1.95 | 0.81109 | 1924.3 | 32.4 | 1889.9 | 20.6 | 1852.4 | 25 | -3.9 |
| Spot 66 | 275492  | 348232  | 27483.7  | 2.225 | 6.3 | 1.3 | 10.2 | 2.1 | 0.5 | 1.74 | 0.80759 | 2452.9 | 35.4 | 2453.6 | 19.9 | 2454.2 | 21 | 0.1  |
| Spot 68 | 1548037 | 1956779 | 36367.6  | 1.234 | 7.4 | 0.9 | 7.7  | 1.8 | 0.4 | 1.62 | 0.87913 | 2205.5 | 30.2 | 2195.8 | 16.5 | 2186.6 | 15 | -0.9 |
| Spot 69 | 179095  | 226384  | 5020.6   | 1.036 | 5.4 | 1.4 | 12.9 | 2.2 | 0.5 | 1.73 | 0.77149 | 2623.2 | 37.2 | 2674.9 | 21.1 | 2714.2 | 23 | 3.4  |
| Spot 70 | 695166  | 878717  | 32692.7  | 1.354 | 7.3 | 0.9 | 7.8  | 1.5 | 0.4 | 1.24 | 0.81664 | 2206.0 | 23.3 | 2207.9 | 13.7 | 2209.7 | 15 | 0.2  |
| Spot 71 | 413613  | 522823  | 10025.0  | 2.920 | 8.7 | 1.2 | 5.4  | 1.6 | 0.3 | 1.09 | 0.67319 | 1880.9 | 17.8 | 1889.5 | 13.9 | 1899.0 | 22 | 1.0  |
| Spot 72 | 1440298 | 1820593 | 35220.2  | 1.953 | 5.6 | 0.9 | 13.0 | 1.5 | 0.5 | 1.24 | 0.80439 | 2712.3 | 27.4 | 2678.3 | 14.5 | 2652.8 | 15 | -2.2 |
| Spot 73 | 380600  | 481093  | 11503.9  | 2.564 | 7.4 | 0.9 | 7.3  | 1.7 | 0.4 | 1.38 | 0.81734 | 2127.5 | 25.0 | 2150.2 | 15.1 | 2172.0 | 17 | 2.0  |
| Spot 74 | 588792  | 744256  | 40951.9  | 0.916 | 5.4 | 0.8 | 13.6 | 1.6 | 0.5 | 1.35 | 0.85996 | 2711.8 | 29.9 | 2720.2 | 14.9 | 2726.5 | 13 | 0.5  |
| Spot 75 | 851314  | 1076093 | 113508.7 | 3.865 | 6.0 | 0.7 | 11.8 | 1.4 | 0.5 | 1.14 | 0.83603 | 2626.3 | 24.6 | 2591.4 | 12.8 | 2564.3 | 13 | -2.4 |
| Spot 76 | 1473858 | 1863013 | 58388.7  | 5.274 | 5.2 | 0.8 | 15.2 | 1.4 | 0.6 | 1.17 | 0.81678 | 2897.8 | 27.3 | 2829.5 | 13.7 | 2781.2 | 14 | -4.2 |
| Spot 77 | 653579  | 826149  | 12687.0  | 2.239 | 7.5 | 1.1 | 7.4  | 1.8 | 0.4 | 1.42 | 0.78045 | 2170.0 | 26.1 | 2161.3 | 16.2 | 2153.1 | 20 | -0.8 |
| Spot 78 | 588716  | 744160  | 7993.6   | 4.399 | 7.7 | 0.9 | 6.9  | 2.0 | 0.4 | 1.74 | 0.88950 | 2100.7 | 31.2 | 2099.2 | 17.4 | 2097.7 | 16 | -0.1 |
| Spot 79 | 1057614 | 1336865 | 137337.4 | 3.409 | 5.6 | 1.1 | 13.2 | 1.7 | 0.5 | 1.37 | 0.79019 | 2758.7 | 30.8 | 2697.2 | 16.4 | 2651.4 | 18 | -4.0 |
| Spot 80 | 292304  | 369484  | 15834.6  | 2.499 | 7.3 | 1.2 | 7.5  | 1.9 | 0.4 | 1.52 | 0.79621 | 2134.9 | 27.7 | 2173.4 | 17.2 | 2210.0 | 20 | 3.4  |
| Spot 81 | 450508  | 569460  | 17111.8  | 2.566 | 7.7 | 0.9 | 7.1  | 1.7 | 0.4 | 1.39 | 0.84123 | 2133.7 | 25.3 | 2122.0 | 14.7 | 2110.8 | 16 | -1.1 |
| Spot 82 | 534265  | 675332  | 22187.6  | 2.239 | 7.8 | 0.9 | 6.9  | 1.7 | 0.4 | 1.52 | 0.86992 | 2103.1 | 27.3 | 2102.3 | 15.5 | 2101.5 | 15 | -0.1 |
| Spot 83 | 747886  | 945357  | 22920.2  | 1.832 | 7.5 | 0.9 | 7.2  | 2.5 | 0.4 | 2.32 | 0.93639 | 2114.1 | 41.8 | 2137.1 | 22.1 | 2159.2 | 15 | 2.1  |
| Spot 84 | 431610  | 545572  | 23520.3  | 2.254 | 7.2 | 0.7 | 7.8  | 1.4 | 0.4 | 1.20 | 0.86954 | 2189.7 | 22.2 | 2210.1 | 12.4 | 2229.1 | 12 | 1.8  |
| Spot 85 | 1305318 | 1649973 | 18819.7  | 1.299 | 8.7 | 1.0 | 5.4  | 2.5 | 0.3 | 2.26 | 0.91311 | 1860.2 | 36.5 | 1878.3 | 21.2 | 1898.5 | 18 | 2.0  |
| Spot 86 | 579070  | 731967  | 23349.4  | 1.436 | 7.4 | 1.0 | 7.7  | 1.8 | 0.4 | 1.53 | 0.84373 | 2217.5 | 28.6 | 2200.4 | 16.3 | 2184.5 | 17 | -1.5 |
| Spot 87 | 340984  | 431017  | 12155.5  | 1.875 | 5.3 | 1.2 | 12.8 | 2.8 | 0.5 | 2.48 | 0.89210 | 2557.4 | 52.4 | 2665.8 | 26.2 | 2749.1 | 21 | 7.0  |
| Spot 88 | 437109  | 552522  | 110469.0 | 2.741 | 7.3 | 0.8 | 7.1  | 2.8 | 0.4 | 2.70 | 0.95761 | 2040.2 | 47.2 | 2129.8 | 25.1 | 2217.4 | 14 | 8.0  |



|          |         |         |          |       |     |     |      |     |     |      |         |        |      |        |      |        |    |      |
|----------|---------|---------|----------|-------|-----|-----|------|-----|-----|------|---------|--------|------|--------|------|--------|----|------|
| Spot 89  | 1282208 | 1620761 | 32204.5  | 1.568 | 7.5 | 1.1 | 7.4  | 1.7 | 0.4 | 1.27 | 0.76484 | 2148.9 | 23.2 | 2156.2 | 14.9 | 2163.0 | 19 | 0.7  |
| Spot 90  | 706250  | 892728  | 271135.4 | 2.098 | 7.7 | 0.8 | 7.0  | 1.3 | 0.4 | 1.05 | 0.79587 | 2119.0 | 18.9 | 2114.5 | 11.7 | 2110.2 | 14 | -0.4 |
| Spot 91  | 762746  | 964140  | 21546.8  | 2.076 | 5.5 | 0.9 | 13.2 | 1.9 | 0.5 | 1.65 | 0.87813 | 2688.8 | 36.3 | 2695.9 | 17.8 | 2701.3 | 15 | 0.5  |
| Spot 92  | 625486  | 790639  | 13674.7  | 1.951 | 7.5 | 1.0 | 7.1  | 1.9 | 0.4 | 1.65 | 0.86075 | 2101.6 | 29.6 | 2126.5 | 17.0 | 2150.7 | 17 | 2.3  |
| Spot 93  | 634791  | 802401  | #####    | 1.488 | 8.2 | 1.0 | 6.2  | 1.6 | 0.4 | 1.33 | 0.80520 | 2003.8 | 22.9 | 2009.6 | 14.4 | 2015.5 | 17 | 0.6  |
| Spot 94  | 683649  | 864158  | 25366.2  | 1.425 | 7.0 | 0.7 | 8.4  | 1.9 | 0.4 | 1.77 | 0.92701 | 2257.1 | 33.7 | 2273.4 | 17.3 | 2288.0 | 12 | 1.4  |
| Spot 95  | 1228215 | 1552512 | 17396.0  | 2.061 | 5.5 | 0.7 | 13.4 | 1.7 | 0.5 | 1.53 | 0.91650 | 2727.4 | 34.0 | 2709.3 | 15.8 | 2695.9 | 11 | -1.2 |
| Spot 96  | 498367  | 629956  | 23188.2  | 2.968 | 7.9 | 3.3 | 6.8  | 5.1 | 0.4 | 3.93 | 0.76605 | 2098.1 | 70.5 | 2084.1 | 45.5 | 2070.3 | 58 | -1.3 |
| Spot 97  | 804467  | 1016878 | 9474.5   | 1.378 | 8.6 | 0.8 | 5.6  | 1.5 | 0.4 | 1.24 | 0.83211 | 1941.5 | 20.7 | 1923.1 | 12.8 | 1903.3 | 15 | -2.0 |
| Spot 98  | 586107  | 740862  | 56818.3  | 1.459 | 7.5 | 0.9 | 7.5  | 1.6 | 0.4 | 1.32 | 0.83665 | 2166.8 | 24.3 | 2169.1 | 14.1 | 2171.3 | 15 | 0.2  |
| Spot 99  | 231873  | 293096  | 4334.4   | 1.550 | 6.7 | 1.1 | 8.7  | 1.6 | 0.4 | 1.13 | 0.70598 | 2275.4 | 21.7 | 2302.2 | 14.6 | 2326.1 | 19 | 2.2  |
| Spot 100 | 801669  | 1013340 | 13649.6  | 2.516 | 5.5 | 0.8 | 13.1 | 1.3 | 0.5 | 0.98 | 0.76527 | 2687.5 | 21.6 | 2684.8 | 12.1 | 2682.8 | 14 | -0.2 |
| Spot 101 | 963628  | 1218064 | 20187.0  | 2.257 | 6.9 | 1.0 | 7.3  | 4.0 | 0.4 | 3.87 | 0.96706 | 1988.2 | 66.1 | 2145.6 | 35.7 | 2299.9 | 17 | 13.6 |
| Spot 102 | 789292  | 997696  | 19898.0  | 1.220 | 7.5 | 0.8 | 7.3  | 1.5 | 0.4 | 1.28 | 0.83550 | 2134.5 | 23.2 | 2144.5 | 13.7 | 2154.0 | 15 | 0.9  |
| Spot 103 | 960121  | 1213630 | 919824.4 | 2.909 | 7.4 | 0.8 | 7.7  | 1.4 | 0.4 | 1.10 | 0.79178 | 2207.6 | 20.5 | 2194.4 | 12.5 | 2182.0 | 15 | -1.2 |
| Spot 104 | 1707009 | 2157725 | 50976.4  | 1.251 | 4.7 | 0.8 | 16.2 | 1.6 | 0.5 | 1.42 | 0.88189 | 2782.8 | 32.0 | 2890.7 | 15.4 | 2966.8 | 12 | 6.2  |
| Spot 105 | 907020  | 1146508 | 44527.7  | 3.101 | 7.5 | 0.8 | 7.3  | 1.2 | 0.4 | 0.87 | 0.72457 | 2135.4 | 15.7 | 2147.5 | 10.7 | 2159.1 | 14 | 1.1  |
| Spot 106 | 711230  | 899022  | 36558.4  | 3.288 | 7.4 | 0.8 | 7.3  | 1.5 | 0.4 | 1.21 | 0.82412 | 2103.1 | 21.8 | 2145.9 | 13.1 | 2187.1 | 15 | 3.8  |
| Spot 107 | 1210137 | 1529660 | 67672.6  | 2.031 | 5.5 | 0.7 | 13.3 | 1.6 | 0.5 | 1.39 | 0.88036 | 2711.7 | 30.8 | 2698.0 | 14.9 | 2687.8 | 12 | -0.9 |
| Spot 108 | 383217  | 484401  | 18597.5  | 2.827 | 7.5 | 1.0 | 7.0  | 1.7 | 0.4 | 1.41 | 0.80801 | 2072.1 | 25.0 | 2117.0 | 15.5 | 2160.8 | 18 | 4.1  |
| Spot 109 | 766997  | 969514  | 42765.1  | 3.703 | 7.6 | 0.8 | 7.1  | 1.8 | 0.4 | 1.60 | 0.89904 | 2101.2 | 28.8 | 2126.2 | 15.9 | 2150.4 | 14 | 2.3  |
| Spot 110 | 535305  | 676647  | 8292.9   | 2.039 | 7.4 | 0.8 | 7.1  | 1.5 | 0.4 | 1.22 | 0.80066 | 2066.7 | 21.5 | 2119.2 | 13.5 | 2170.6 | 16 | 4.8  |
| Spot 111 | 486403  | 614833  | 143543.0 | 2.845 | 7.6 | 0.9 | 7.1  | 1.8 | 0.4 | 1.51 | 0.85104 | 2098.3 | 27.1 | 2119.2 | 15.8 | 2139.5 | 16 | 1.9  |
| Spot 112 | 1435509 | 1814539 | 36731.7  | 2.097 | 5.5 | 0.8 | 13.2 | 1.7 | 0.5 | 1.55 | 0.88922 | 2675.7 | 33.9 | 2691.6 | 16.4 | 2703.5 | 13 | 1.0  |
| Spot 113 | 864345  | 1092566 | 78526.7  | 1.950 | 5.6 | 3.2 | 13.2 | 4.7 | 0.5 | 3.43 | 0.72754 | 2745.5 | 76.7 | 2693.6 | 44.5 | 2654.8 | 54 | -3.4 |
| Spot 114 | 1411624 | 1784348 | 39759.0  | 1.488 | 7.7 | 0.7 | 6.9  | 1.4 | 0.4 | 1.16 | 0.84744 | 2075.2 | 20.5 | 2094.9 | 12.1 | 2114.3 | 13 | 1.9  |
| Spot 115 | 373105  | 471619  | 4683.1   | 2.926 | 7.7 | 1.4 | 5.4  | 4.0 | 0.3 | 3.76 | 0.93452 | 1721.9 | 56.8 | 1892.7 | 34.5 | 2085.6 | 25 | 17.4 |
| Spot 116 | 444840  | 562295  | 8951.5   | 0.929 | 7.7 | 0.9 | 7.0  | 1.9 | 0.4 | 1.65 | 0.86742 | 2131.6 | 30.0 | 2116.2 | 17.0 | 2101.3 | 17 | -1.4 |
| Spot 117 | 612417  | 774119  | 37655.7  | 2.412 | 5.1 | 0.9 | 14.2 | 1.3 | 0.5 | 0.87 | 0.69270 | 2702.5 | 19.3 | 2760.6 | 11.9 | 2803.4 | 15 | 3.6  |
| Spot 118 | 1437381 | 1816905 | 40991.7  | 1.934 | 5.5 | 1.1 | 13.5 | 1.7 | 0.5 | 1.35 | 0.78905 | 2724.1 | 30.0 | 2711.8 | 16.2 | 2702.7 | 17 | -0.8 |
| Spot 119 | 1869836 | 2363545 | 106054.5 | 4.351 | 7.6 | 0.9 | 7.2  | 1.6 | 0.4 | 1.35 | 0.83835 | 2121.4 | 24.4 | 2132.3 | 14.4 | 2142.8 | 15 | 1.0  |
| Spot 120 | 532505  | 673107  | 31407.9  | 1.108 | 8.2 | 1.3 | 6.0  | 1.9 | 0.4 | 1.40 | 0.73874 | 1936.2 | 23.4 | 1969.6 | 16.5 | 2004.9 | 23 | 3.4  |
| Spot 121 | 760752  | 961620  | 16123.7  | 2.405 | 7.5 | 0.8 | 7.5  | 1.3 | 0.4 | 1.06 | 0.79014 | 2180.1 | 19.7 | 2175.5 | 12.1 | 2171.1 | 14 | -0.4 |
| Spot 122 | 366394  | 463136  | 29017.4  | 0.743 | 7.2 | 0.9 | 7.7  | 1.7 | 0.4 | 1.42 | 0.83371 | 2158.0 | 26.1 | 2196.4 | 15.3 | 2232.4 | 16 | 3.3  |
| Spot 123 | 1049805 | 1326994 | 48119.8  | 2.596 | 5.6 | 0.8 | 13.2 | 1.5 | 0.5 | 1.29 | 0.86324 | 2711.8 | 28.6 | 2692.6 | 14.1 | 2678.2 | 12 | -1.3 |
| Spot 125 | 834429  | 1054751 | #####    | 1.150 | 7.6 | 1.1 | 7.1  | 1.6 | 0.4 | 1.17 | 0.72876 | 2113.2 | 21.1 | 2129.8 | 14.3 | 2145.8 | 19 | 1.5  |
| Spot 126 | 356705  | 450889  | 9139.9   | 1.236 | 5.1 | 0.8 | 14.2 | 1.6 | 0.5 | 1.33 | 0.85975 | 2709.6 | 29.5 | 2764.0 | 14.7 | 2804.0 | 13 | 3.4  |
| Spot 127 | 737362  | 932055  | 18659.7  | 0.807 | 7.4 | 0.8 | 7.4  | 1.4 | 0.4 | 1.15 | 0.80406 | 2126.7 | 20.8 | 2158.3 | 12.8 | 2188.5 | 15 | 2.8  |
| Spot 128 | 879316  | 1111490 | 17541.1  | 1.656 | 7.5 | 0.7 | 7.6  | 1.3 | 0.4 | 1.04 | 0.81581 | 2204.1 | 19.5 | 2184.6 | 11.5 | 2166.2 | 13 | -1.7 |
| Spot 129 | 375863  | 475106  | 8203.8   | 2.343 | 7.2 | 1.1 | 7.6  | 1.9 | 0.4 | 1.61 | 0.82598 | 2144.4 | 29.3 | 2184.1 | 17.4 | 2221.5 | 19 | 3.5  |
| Spot 130 | 1116189 | 1410906 | 35676.0  | 2.509 | 7.7 | 0.9 | 7.0  | 1.5 | 0.4 | 1.24 | 0.81060 | 2092.8 | 22.2 | 2112.8 | 13.6 | 2132.4 | 16 | 1.9  |
| Spot 131 | 842700  | 1065206 | 96981.8  | 1.155 | 7.3 | 0.7 | 7.6  | 2.2 | 0.4 | 2.06 | 0.95369 | 2139.5 | 37.5 | 2187.2 | 19.4 | 2232.2 | 11 | 4.2  |
| Spot 132 | 1261897 | 1595086 | 33768.1  | 2.492 | 5.4 | 0.7 | 12.6 | 2.3 | 0.5 | 2.20 | 0.94874 | 2554.4 | 46.5 | 2647.9 | 21.9 | 2720.0 | 12 | 6.1  |

|          |         |         |          |       |     |     |      |     |     |      |         |        |      |        |      |        |    |      |
|----------|---------|---------|----------|-------|-----|-----|------|-----|-----|------|---------|--------|------|--------|------|--------|----|------|
| Spot 133 | 455810  | 576162  | 17726.3  | 1.303 | 7.8 | 1.0 | 6.6  | 1.9 | 0.4 | 1.69 | 0.86625 | 2021.5 | 29.2 | 2060.2 | 17.2 | 2099.2 | 17 | 3.7  |
| Spot 134 | 790310  | 998982  | 122849.2 | 2.348 | 5.5 | 0.9 | 13.3 | 1.7 | 0.5 | 1.45 | 0.84851 | 2695.5 | 32.0 | 2699.1 | 16.1 | 2701.8 | 15 | 0.2  |
| Spot 135 | 890322  | 1125401 | 36238.3  | 0.871 | 8.0 | 0.9 | 6.5  | 1.6 | 0.4 | 1.32 | 0.83068 | 2025.0 | 22.9 | 2041.7 | 14.0 | 2058.6 | 16 | 1.6  |
| Spot 136 | 429235  | 542570  | 39790.8  | 1.083 | 7.6 | 1.0 | 6.7  | 2.7 | 0.4 | 2.55 | 0.93411 | 2012.7 | 44.0 | 2078.0 | 24.1 | 2143.3 | 17 | 6.1  |
| Spot 137 | 750940  | 949217  | 18598.8  | 2.039 | 7.6 | 0.7 | 7.1  | 1.3 | 0.4 | 1.16 | 0.86129 | 2113.6 | 20.9 | 2128.3 | 12.0 | 2142.5 | 12 | 1.3  |
| Spot 138 | 416813  | 526868  | 12846.6  | 1.688 | 7.4 | 1.4 | 6.8  | 1.8 | 0.4 | 1.20 | 0.65706 | 1999.1 | 20.6 | 2087.7 | 16.1 | 2176.2 | 24 | 8.1  |
| Spot 139 | 637237  | 805492  | 30853.7  | 2.685 | 7.5 | 1.1 | 7.3  | 1.7 | 0.4 | 1.29 | 0.75746 | 2129.1 | 23.5 | 2148.1 | 15.3 | 2166.3 | 19 | 1.7  |
| Spot 140 | 841757  | 1064014 | 18241.4  | 2.108 | 7.1 | 0.9 | 8.0  | 2.3 | 0.4 | 2.11 | 0.91596 | 2199.1 | 39.3 | 2230.1 | 20.8 | 2258.7 | 16 | 2.6  |
| Spot 141 | 1146672 | 1449437 | 36655.9  | 2.451 | 7.8 | 0.8 | 6.8  | 1.4 | 0.4 | 1.11 | 0.80629 | 2067.5 | 19.6 | 2086.0 | 12.2 | 2104.3 | 14 | 1.7  |
| Spot 142 | 275626  | 348403  | 8240.5   | 1.609 | 8.2 | 1.0 | 6.0  | 1.8 | 0.4 | 1.44 | 0.80874 | 1950.0 | 24.2 | 1968.6 | 15.5 | 1988.2 | 19 | 1.9  |
| Spot 143 | 965372  | 1220267 | 27812.0  | 1.998 | 5.5 | 0.8 | 13.0 | 1.6 | 0.5 | 1.37 | 0.85130 | 2651.8 | 29.7 | 2680.9 | 15.2 | 2702.9 | 14 | 1.9  |
| Spot 144 | 534323  | 675405  | 6321.5   | 2.175 | 7.6 | 0.8 | 7.4  | 1.6 | 0.4 | 1.35 | 0.86005 | 2202.6 | 25.2 | 2164.8 | 14.1 | 2129.1 | 14 | -3.5 |
| Spot 145 | 936701  | 1184026 | 118340.5 | 2.217 | 5.5 | 0.7 | 13.1 | 1.5 | 0.5 | 1.32 | 0.88236 | 2657.7 | 28.8 | 2687.8 | 14.2 | 2710.5 | 12 | 1.9  |
| Spot 146 | 1061385 | 1341632 | 29613.2  | 1.027 | 6.4 | 0.8 | 9.9  | 1.5 | 0.5 | 1.31 | 0.84991 | 2397.7 | 26.3 | 2429.2 | 14.3 | 2455.6 | 14 | 2.4  |
| Spot 147 | 558988  | 706583  | 19614.5  | 2.859 | 7.3 | 0.6 | 7.9  | 1.7 | 0.4 | 1.55 | 0.91918 | 2225.9 | 29.1 | 2216.2 | 15.2 | 2207.1 | 12 | -0.9 |
| Spot 148 | 817325  | 1033130 | 11926.8  | 2.239 | 8.7 | 0.9 | 5.4  | 1.8 | 0.3 | 1.49 | 0.85096 | 1885.5 | 24.4 | 1892.7 | 15.0 | 1900.7 | 17 | 0.8  |
| Spot 149 | 1561772 | 1974140 | 69614.2  | 1.996 | 5.5 | 1.0 | 13.3 | 1.6 | 0.5 | 1.22 | 0.77453 | 2719.3 | 27.0 | 2700.0 | 14.8 | 2685.7 | 16 | -1.3 |
| Spot 150 | 889487  | 1124347 | 29097.8  | 0.710 | 8.0 | 1.0 | 6.5  | 1.5 | 0.4 | 1.13 | 0.76469 | 2049.2 | 19.9 | 2051.1 | 13.1 | 2052.9 | 17 | 0.2  |
| Spot 151 | 1118113 | 1413338 | 23001.8  | 2.036 | 8.5 | 0.8 | 5.7  | 1.6 | 0.3 | 1.40 | 0.86386 | 1922.0 | 23.2 | 1937.1 | 14.0 | 1953.4 | 15 | 1.6  |
| Spot 152 | 220432  | 278634  | 3179.9   | 2.088 | 7.7 | 1.1 | 6.6  | 2.4 | 0.4 | 2.10 | 0.88884 | 2028.9 | 36.6 | 2055.9 | 20.9 | 2083.0 | 19 | 2.6  |
| Spot 153 | 252992  | 319792  | 6187.6   | 0.988 | 7.4 | 0.8 | 7.0  | 1.8 | 0.4 | 1.38 | 0.78707 | 2054.8 | 24.3 | 2112.6 | 15.6 | 2169.3 | 19 | 5.3  |
| Spot 154 | 409841  | 518055  | 8350.3   | 1.541 | 8.7 | 1.0 | 5.5  | 1.8 | 0.3 | 1.45 | 0.81235 | 1923.1 | 24.1 | 1904.4 | 15.3 | 1884.1 | 19 | -2.1 |
| Spot 155 | 1058551 | 1338049 | 33493.8  | 1.099 | 7.7 | 0.8 | 7.3  | 1.7 | 0.4 | 1.55 | 0.89159 | 2172.8 | 28.6 | 2149.3 | 15.5 | 2127.0 | 14 | -2.2 |
| Spot 157 | 145212  | 183554  | 11849.5  | 0.917 | 5.5 | 1.1 | 12.8 | 1.9 | 0.5 | 1.56 | 0.82241 | 2620.2 | 33.6 | 2667.1 | 17.9 | 2702.8 | 18 | 3.1  |
| Spot 158 | 696837  | 880828  | 547592.2 | 0.811 | 7.4 | 0.9 | 7.5  | 1.4 | 0.4 | 1.09 | 0.77086 | 2149.1 | 20.0 | 2177.9 | 12.7 | 2205.1 | 16 | 2.5  |
| Spot 159 | 1179390 | 1490794 | 279697.2 | 2.163 | 5.5 | 0.5 | 13.5 | 1.3 | 0.5 | 1.21 | 0.91155 | 2732.5 | 27.0 | 2716.6 | 12.6 | 2704.7 | 9  | -1.0 |
| Spot 160 | 803006  | 1015031 | 17053.2  | 1.495 | 7.3 | 1.7 | 7.4  | 2.0 | 0.4 | 0.99 | 0.49488 | 2105.3 | 17.8 | 2164.0 | 17.9 | 2220.1 | 30 | 5.2  |
| Spot 161 | 1379166 | 1743319 | 28379.2  | 2.004 | 5.4 | 0.9 | 13.6 | 1.6 | 0.5 | 1.35 | 0.84316 | 2742.0 | 30.2 | 2725.6 | 15.2 | 2713.5 | 14 | -1.1 |
| Spot 162 | 445548  | 563189  | 11994.2  | 1.910 | 7.3 | 0.9 | 7.7  | 1.5 | 0.4 | 1.23 | 0.80083 | 2191.7 | 22.9 | 2194.2 | 13.8 | 2196.5 | 16 | 0.2  |
| Spot 163 | 713502  | 901894  | 19493.1  | 1.815 | 7.3 | 0.7 | 7.6  | 1.4 | 0.4 | 1.16 | 0.84509 | 2165.8 | 21.3 | 2189.8 | 12.3 | 2212.3 | 13 | 2.1  |
| Spot 164 | 1796574 | 2270940 | #####    | 1.958 | 7.8 | 0.9 | 6.9  | 1.5 | 0.4 | 1.13 | 0.77105 | 2071.4 | 20.0 | 2092.4 | 13.0 | 2113.1 | 16 | 2.0  |
| Spot 165 | 575546  | 727513  | 562006.1 | 2.779 | 7.6 | 1.0 | 7.0  | 1.7 | 0.4 | 1.35 | 0.80920 | 2073.4 | 23.9 | 2113.6 | 14.8 | 2153.0 | 17 | 3.7  |
| Spot 166 | 949061  | 1199650 | 32603.5  | 1.415 | 8.0 | 0.8 | 6.3  | 3.1 | 0.4 | 2.96 | 0.96544 | 1970.3 | 50.2 | 2014.8 | 26.9 | 2060.7 | 14 | 4.4  |
| Spot 167 | 934175  | 1180833 | 51416.2  | 1.859 | 8.5 | 1.0 | 5.6  | 1.4 | 0.3 | 0.93 | 0.67791 | 1889.4 | 15.3 | 1914.1 | 11.9 | 1940.9 | 18 | 2.7  |
| Spot 168 | 280633  | 354731  | 3357.1   | 2.908 | 7.3 | 1.1 | 7.1  | 2.0 | 0.4 | 1.73 | 0.85032 | 2088.4 | 30.9 | 2124.2 | 18.1 | 2159.0 | 19 | 3.3  |
| Spot 169 | 607959  | 768484  | 315469.8 | 0.684 | 8.0 | 1.0 | 6.1  | 2.6 | 0.3 | 2.36 | 0.91852 | 1917.1 | 39.2 | 1990.4 | 22.4 | 2067.4 | 18 | 7.3  |
| Spot 171 | 353574  | 446931  | 190515.8 | 1.952 | 7.8 | 0.9 | 6.9  | 1.6 | 0.4 | 1.29 | 0.82730 | 2077.0 | 23.0 | 2092.9 | 13.9 | 2108.5 | 15 | 1.5  |
| Spot 172 | 992304  | 1254311 | 14389.8  | 2.021 | 7.5 | 0.8 | 7.3  | 1.5 | 0.4 | 1.34 | 0.86364 | 2140.5 | 24.3 | 2147.6 | 13.8 | 2154.4 | 14 | 0.6  |
| Spot 174 | 749269  | 947105  | 31537.7  | 1.004 | 7.6 | 1.3 | 7.3  | 3.8 | 0.4 | 3.60 | 0.94411 | 2162.6 | 66.2 | 2148.6 | 34.1 | 2135.3 | 22 | -1.3 |
| Spot 175 | 820591  | 1037259 | 62586.9  | 0.995 | 5.2 | 0.6 | 15.4 | 1.2 | 0.6 | 1.00 | 0.84593 | 2905.9 | 23.4 | 2841.9 | 11.3 | 2796.9 | 10 | -3.9 |
| Spot 176 | 970303  | 1226501 | 27370.0  | 2.332 | 5.5 | 0.7 | 13.3 | 1.3 | 0.5 | 1.05 | 0.82169 | 2718.9 | 23.3 | 2698.6 | 12.1 | 2683.3 | 12 | -1.3 |
| Spot 177 | 704060  | 889959  | 17456.2  | 0.757 | 8.0 | 1.0 | 6.2  | 1.6 | 0.4 | 1.25 | 0.79274 | 1965.1 | 21.2 | 2011.2 | 13.8 | 2058.9 | 17 | 4.6  |
| Spot 178 | 784871  | 992107  | 28781.2  | 2.043 | 7.6 | 1.0 | 7.1  | 1.6 | 0.4 | 1.33 | 0.80987 | 2099.8 | 23.8 | 2124.6 | 14.6 | 2148.7 | 17 | 2.3  |

|          |         |         |          |       |     |     |      |     |     |      |         |        |      |        |      |        |    |      |
|----------|---------|---------|----------|-------|-----|-----|------|-----|-----|------|---------|--------|------|--------|------|--------|----|------|
| Spot 179 | 531456  | 671780  | 19113.5  | 0.967 | 7.4 | 0.9 | 7.6  | 1.4 | 0.4 | 1.11 | 0.78289 | 2180.2 | 20.5 | 2183.7 | 12.7 | 2187.1 | 15 | 0.3  |
| Spot 180 | 734655  | 928632  | 50250.0  | 1.287 | 7.3 | 0.8 | 7.8  | 1.6 | 0.4 | 1.36 | 0.86489 | 2212.7 | 25.4 | 2211.6 | 14.1 | 2210.6 | 14 | -0.1 |
| Spot 182 | 1734446 | 2192407 | 236040.9 | 2.001 | 4.9 | 0.8 | 16.4 | 1.5 | 0.6 | 1.30 | 0.86264 | 2946.3 | 30.6 | 2901.3 | 14.4 | 2870.3 | 12 | -2.6 |
| Spot 183 | 1011926 | 1279114 | 11247.2  | 2.066 | 7.5 | 0.8 | 7.5  | 1.5 | 0.4 | 1.31 | 0.85632 | 2196.8 | 24.4 | 2174.0 | 13.7 | 2152.6 | 14 | -2.1 |
| Spot 184 | 619619  | 783222  | 13588.9  | 2.004 | 8.6 | 0.9 | 5.5  | 1.7 | 0.3 | 1.39 | 0.82545 | 1894.9 | 22.7 | 1899.8 | 14.4 | 1905.0 | 17 | 0.5  |
| Spot 185 | 1199193 | 1515826 | 76764.2  | 1.335 | 8.0 | 0.8 | 6.4  | 2.0 | 0.4 | 1.79 | 0.92000 | 2015.3 | 31.1 | 2034.7 | 17.1 | 2054.3 | 14 | 1.9  |
| Spot 187 | 366803  | 463654  | 42160.2  | 1.958 | 7.4 | 0.9 | 7.3  | 1.7 | 0.4 | 1.46 | 0.84475 | 2100.6 | 26.3 | 2149.1 | 15.5 | 2195.8 | 16 | 4.3  |
| Spot 188 | 756197  | 955862  | 17448.3  | 2.422 | 7.1 | 0.9 | 7.9  | 1.8 | 0.4 | 1.55 | 0.86971 | 2183.1 | 28.7 | 2217.9 | 16.1 | 2250.2 | 15 | 3.0  |
| Spot 189 | 797634  | 1008240 | 16007.5  | 1.491 | 8.1 | 1.0 | 6.3  | 1.9 | 0.4 | 1.61 | 0.85262 | 2016.3 | 27.9 | 2019.6 | 16.6 | 2022.9 | 17 | 0.3  |
| Spot 190 | 1073750 | 1357262 | 33050.9  | 1.952 | 6.1 | 1.2 | 10.9 | 1.9 | 0.5 | 1.51 | 0.78053 | 2528.5 | 31.6 | 2517.1 | 18.0 | 2508.0 | 20 | -0.8 |
| Spot 191 | 570065  | 720585  | 18672.8  | 1.701 | 8.4 | 0.9 | 5.7  | 1.6 | 0.3 | 1.25 | 0.79805 | 1887.6 | 20.5 | 1924.6 | 13.5 | 1964.7 | 17 | 3.9  |
| Spot 192 | 949562  | 1200283 | 45068.7  | 1.789 | 7.6 | 0.8 | 7.2  | 1.5 | 0.4 | 1.30 | 0.84516 | 2128.7 | 23.6 | 2131.2 | 13.7 | 2133.5 | 14 | 0.2  |
| Spot 193 | 523597  | 661847  | 30741.4  | 2.210 | 7.7 | 0.9 | 6.7  | 2.3 | 0.4 | 2.12 | 0.91897 | 2026.3 | 36.8 | 2071.8 | 20.3 | 2117.3 | 16 | 4.3  |
| Spot 194 | 874057  | 1104842 | 14931.7  | 2.217 | 5.5 | 0.7 | 13.0 | 1.6 | 0.5 | 1.42 | 0.89045 | 2664.7 | 31.1 | 2679.1 | 15.1 | 2690.0 | 12 | 0.9  |
| Spot 195 | 722554  | 913336  | 26648.3  | 1.206 | 6.7 | 0.9 | 8.6  | 1.2 | 0.4 | 0.89 | 0.71941 | 2250.6 | 16.9 | 2301.5 | 11.2 | 2346.9 | 15 | 4.1  |
| Spot 196 | 683536  | 864016  | 15706.8  | 1.282 | 7.7 | 0.8 | 6.9  | 1.6 | 0.4 | 1.31 | 0.84703 | 2072.7 | 23.3 | 2096.1 | 13.8 | 2119.1 | 14 | 2.2  |
| Spot 197 | 2241048 | 2832771 | 185836.9 | 0.724 | 7.8 | 0.9 | 6.7  | 1.4 | 0.4 | 1.08 | 0.78267 | 2058.4 | 19.0 | 2075.9 | 12.2 | 2093.3 | 15 | 1.7  |
| Spot 199 | 917683  | 1159987 | 36527.2  | 2.043 | 5.5 | 0.8 | 13.4 | 1.3 | 0.5 | 1.08 | 0.81585 | 2729.6 | 24.1 | 2710.7 | 12.6 | 2696.5 | 13 | -1.2 |
| Spot 200 | 867314  | 1096318 | 37013.6  | 2.518 | 5.6 | 0.9 | 13.2 | 1.6 | 0.5 | 1.28 | 0.80720 | 2724.2 | 28.5 | 2691.8 | 15.0 | 2667.6 | 16 | -2.1 |
| Spot 201 | 661151  | 835720  | 9994.6   | 1.860 | 8.6 | 0.8 | 5.0  | 1.3 | 0.3 | 0.98 | 0.75454 | 1743.5 | 14.9 | 1823.9 | 10.9 | 1916.9 | 15 | 9.0  |
| Spot 202 | 1300900 | 1644388 | 34810.4  | 1.340 | 7.4 | 0.8 | 7.9  | 1.9 | 0.4 | 1.67 | 0.89559 | 2234.3 | 31.6 | 2215.4 | 16.8 | 2198.0 | 14 | -1.6 |
| Spot 203 | 755481  | 954958  | 89943.0  | 2.282 | 5.5 | 0.9 | 13.1 | 1.4 | 0.5 | 1.03 | 0.74319 | 2688.9 | 22.6 | 2688.5 | 13.1 | 2688.3 | 15 | 0.0  |
| Spot 204 | 366952  | 463841  | 13052.7  | 2.248 | 7.2 | 1.3 | 7.5  | 1.8 | 0.4 | 1.24 | 0.68854 | 2112.2 | 22.4 | 2176.1 | 16.2 | 2236.9 | 23 | 5.6  |
| Spot 205 | 1499302 | 1895176 | 106917.8 | 2.798 | 5.7 | 1.1 | 12.2 | 1.8 | 0.5 | 1.42 | 0.80333 | 2609.1 | 30.6 | 2623.2 | 16.6 | 2634.2 | 18 | 1.0  |
| Spot 206 | 1054741 | 1333233 | 60985.5  | 0.907 | 7.5 | 1.0 | 7.2  | 1.8 | 0.4 | 1.54 | 0.84152 | 2104.6 | 27.7 | 2133.5 | 16.3 | 2161.4 | 17 | 2.6  |
| Spot 207 | 603976  | 763449  | 29748.5  | 1.831 | 4.7 | 0.8 | 17.6 | 1.5 | 0.6 | 1.22 | 0.82309 | 2975.4 | 29.1 | 2965.9 | 14.2 | 2959.4 | 14 | -0.5 |
| Spot 208 | 417212  | 527372  | 12467.7  | 2.491 | 6.0 | 0.9 | 10.5 | 1.6 | 0.5 | 1.32 | 0.83920 | 2422.0 | 26.6 | 2483.1 | 14.5 | 2533.5 | 14 | 4.4  |
| Spot 209 | 365905  | 462518  | 15342.2  | 8.740 | 7.5 | 1.0 | 7.2  | 1.8 | 0.4 | 1.52 | 0.83102 | 2101.9 | 27.3 | 2134.5 | 16.3 | 2166.0 | 18 | 3.0  |
| Spot 210 | 917032  | 1159164 | 15787.2  | 2.839 | 7.6 | 1.3 | 7.3  | 2.3 | 0.4 | 1.84 | 0.81659 | 2165.0 | 33.9 | 2144.6 | 20.1 | 2125.1 | 23 | -1.9 |
| Spot 212 | 516794  | 653247  | 39678.5  | 1.089 | 4.1 | 0.9 | 21.6 | 1.6 | 0.6 | 1.37 | 0.84449 | 3138.2 | 34.1 | 3164.8 | 15.8 | 3181.7 | 14 | 1.4  |
| Spot 213 | 598499  | 756527  | 14914.9  | 1.739 | 8.6 | 1.0 | 5.6  | 1.6 | 0.3 | 1.24 | 0.77005 | 1907.1 | 20.5 | 1910.8 | 13.9 | 1914.8 | 18 | 0.4  |
| Spot 214 | 2642863 | 3340681 | 55976.5  | 2.217 | 4.8 | 0.8 | 17.2 | 1.8 | 0.6 | 1.54 | 0.87784 | 3006.2 | 36.9 | 2945.2 | 16.8 | 2903.7 | 14 | -3.5 |
| Spot 215 | 668415  | 844903  | 35387.4  | 1.155 | 7.6 | 1.3 | 7.3  | 1.9 | 0.4 | 1.37 | 0.72123 | 2168.6 | 25.2 | 2148.8 | 17.0 | 2129.9 | 23 | -1.8 |
| Spot 216 | 594625  | 751629  | 16727.3  | 2.393 | 7.8 | 0.9 | 6.7  | 1.7 | 0.4 | 1.42 | 0.84179 | 2066.9 | 25.1 | 2077.0 | 14.9 | 2087.1 | 16 | 1.0  |
| Spot 217 | 716150  | 905242  | 231110.9 | 1.213 | 5.0 | 0.9 | 15.8 | 1.4 | 0.6 | 1.04 | 0.76824 | 2869.4 | 24.1 | 2865.6 | 12.9 | 2862.9 | 14 | -0.2 |
| Spot 218 | 1079410 | 1364415 | 39808.4  | 1.215 | 7.8 | 1.0 | 7.2  | 1.9 | 0.4 | 1.57 | 0.83382 | 2177.0 | 29.0 | 2138.5 | 16.8 | 2101.6 | 18 | -3.6 |
| Spot 219 | 624381  | 789242  | 151936.0 | 1.931 | 7.3 | 0.7 | 7.6  | 1.3 | 0.4 | 1.07 | 0.83244 | 2167.5 | 19.6 | 2185.9 | 11.5 | 2203.3 | 12 | 1.6  |
| Spot 220 | 670261  | 847236  | 7917.4   | 1.746 | 8.6 | 0.9 | 5.5  | 1.8 | 0.3 | 1.54 | 0.87414 | 1905.9 | 25.4 | 1897.6 | 15.1 | 1888.6 | 15 | -0.9 |
| Spot 221 | 522680  | 660688  | 25327.5  | 1.726 | 7.6 | 1.0 | 7.1  | 1.4 | 0.4 | 1.03 | 0.72720 | 2102.5 | 18.5 | 2120.6 | 12.6 | 2138.3 | 17 | 1.7  |
| Spot 222 | 776128  | 981056  | 27927.3  | 2.064 | 7.7 | 0.9 | 6.9  | 1.6 | 0.4 | 1.26 | 0.80088 | 2094.5 | 22.6 | 2102.7 | 14.0 | 2110.8 | 17 | 0.8  |
| Spot 223 | 1407582 | 1779238 | 20641.3  | 2.100 | 5.4 | 1.1 | 13.3 | 1.6 | 0.5 | 1.15 | 0.73612 | 2703.4 | 25.5 | 2701.6 | 14.8 | 2700.3 | 18 | -0.1 |
| Spot 224 | 874931  | 1105946 | 53366.5  | 2.273 | 5.4 | 0.7 | 13.7 | 1.4 | 0.5 | 1.22 | 0.87701 | 2750.1 | 27.3 | 2731.8 | 13.1 | 2718.3 | 11 | -1.2 |
| Spot 225 | 699892  | 884691  | 26598.5  | 2.407 | 3.4 | 0.7 | 29.3 | 1.6 | 0.7 | 1.41 | 0.88982 | 3462.8 | 37.9 | 3464.1 | 15.6 | 3464.8 | 11 | 0.1  |

|          |         |         |          |       |     |     |      |     |     |      |         |        |      |        |      |        |    |      |
|----------|---------|---------|----------|-------|-----|-----|------|-----|-----|------|---------|--------|------|--------|------|--------|----|------|
| Spot 226 | 776031  | 980933  | 56545.4  | 2.162 | 5.4 | 0.7 | 13.3 | 1.5 | 0.5 | 1.33 | 0.87924 | 2689.1 | 29.3 | 2698.4 | 14.3 | 2705.4 | 12 | 0.6  |
| Spot 227 | 998793  | 1262512 | 42350.5  | 1.181 | 7.7 | 0.8 | 7.1  | 1.5 | 0.4 | 1.21 | 0.82727 | 2127.2 | 22.0 | 2124.6 | 13.1 | 2122.0 | 14 | -0.2 |
| Spot 228 | 404149  | 510860  | 12049.2  | 1.954 | 8.7 | 0.8 | 5.3  | 1.6 | 0.3 | 1.40 | 0.87128 | 1853.4 | 22.5 | 1867.8 | 13.7 | 1883.9 | 14 | 1.6  |
| Spot 229 | 760824  | 961711  | 24527.1  | 2.151 | 5.5 | 0.8 | 13.2 | 1.6 | 0.5 | 1.42 | 0.87332 | 2697.7 | 31.3 | 2692.8 | 15.4 | 2689.1 | 13 | -0.3 |
| Spot 230 | 1203719 | 1521548 | 37605.2  | 5.266 | 7.5 | 1.1 | 7.3  | 1.9 | 0.4 | 1.57 | 0.82204 | 2129.2 | 28.5 | 2146.7 | 17.1 | 2163.5 | 19 | 1.6  |
| Spot 231 | 847812  | 1071667 | 31116.3  | 2.622 | 7.4 | 1.0 | 7.6  | 1.6 | 0.4 | 1.31 | 0.80857 | 2178.5 | 24.2 | 2181.2 | 14.5 | 2183.8 | 17 | 0.2  |
| Spot 232 | 873058  | 1103579 | 25600.4  | 2.458 | 3.9 | 0.7 | 23.1 | 1.3 | 0.7 | 1.16 | 0.86776 | 3240.1 | 29.4 | 3231.3 | 13.0 | 3225.9 | 10 | -0.4 |
| Spot 233 | 581691  | 735279  | 70441.3  | 1.505 | 5.5 | 0.7 | 13.6 | 2.0 | 0.5 | 1.93 | 0.94697 | 2747.9 | 43.1 | 2719.4 | 19.2 | 2698.2 | 11 | -1.8 |
| Spot 234 | 695712  | 879406  | 46616.3  | 1.625 | 5.3 | 1.1 | 13.6 | 1.9 | 0.5 | 1.53 | 0.80523 | 2701.9 | 33.7 | 2720.0 | 17.9 | 2733.4 | 18 | 1.2  |
| Spot 235 | 1408627 | 1780559 | 555954.3 | 1.134 | 3.9 | 1.0 | 23.6 | 1.8 | 0.7 | 1.56 | 0.85107 | 3269.3 | 39.9 | 3250.8 | 17.8 | 3239.3 | 15 | -0.9 |
| Spot 237 | 243443  | 307721  | 1722.0   | 0.962 | 8.3 | 1.4 | 5.1  | 2.2 | 0.3 | 1.68 | 0.76783 | 1799.5 | 26.4 | 1828.1 | 18.6 | 1860.8 | 25 | 3.3  |
| Spot 238 | 835642  | 1056284 | 28409.1  | 1.469 | 4.7 | 0.8 | 18.0 | 1.7 | 0.6 | 1.48 | 0.88343 | 3048.4 | 36.0 | 2988.2 | 16.1 | 2948.0 | 13 | -3.4 |
| Spot 239 | 199453  | 252116  | 3342.6   | 1.616 | 7.2 | 1.4 | 7.4  | 2.4 | 0.4 | 1.93 | 0.79990 | 2159.9 | 35.4 | 2166.1 | 21.6 | 2171.9 | 25 | 0.6  |
| Spot 240 | 1257271 | 1589239 | 363918.0 | 2.149 | 5.4 | 0.7 | 13.5 | 1.2 | 0.5 | 1.02 | 0.82832 | 2736.0 | 22.7 | 2716.6 | 11.6 | 2702.3 | 11 | -1.2 |
| Spot 241 | 571543  | 722453  | 20229.6  | 2.903 | 7.3 | 0.9 | 7.6  | 1.4 | 0.4 | 1.12 | 0.78675 | 2175.3 | 20.6 | 2187.2 | 12.7 | 2198.3 | 15 | 1.0  |
| Spot 242 | 1604380 | 2027999 | 246099.3 | 2.136 | 8.0 | 0.8 | 6.9  | 1.3 | 0.4 | 1.04 | 0.79182 | 2138.7 | 18.9 | 2095.8 | 11.7 | 2054.0 | 14 | -4.1 |
| Spot 243 | 1150263 | 1453977 | 32260.9  | 1.999 | 7.4 | 0.9 | 8.0  | 1.5 | 0.4 | 1.24 | 0.81977 | 2278.5 | 23.8 | 2227.1 | 13.6 | 2180.2 | 15 | -4.5 |
| Spot 244 | 1693447 | 2140583 | 39342.5  | 2.223 | 5.4 | 1.1 | 13.5 | 2.3 | 0.5 | 2.09 | 0.88900 | 2727.5 | 46.4 | 2713.8 | 22.2 | 2703.5 | 18 | -0.9 |
| Spot 245 | 1223284 | 1546278 | 34562.0  | 1.086 | 7.4 | 0.7 | 7.6  | 1.5 | 0.4 | 1.34 | 0.87703 | 2209.3 | 25.1 | 2189.0 | 13.7 | 2170.1 | 13 | -1.8 |
| Spot 247 | 513814  | 649481  | 9013.3   | 2.677 | 7.0 | 1.1 | 8.6  | 1.6 | 0.4 | 1.07 | 0.69022 | 2329.1 | 21.0 | 2297.7 | 14.1 | 2270.0 | 19 | -2.6 |
| Spot 249 | 597461  | 755213  | 22528.6  | 1.800 | 7.7 | 1.4 | 7.1  | 2.1 | 0.4 | 1.62 | 0.76158 | 2154.8 | 29.6 | 2128.9 | 18.9 | 2104.0 | 24 | -2.4 |
| Spot 250 | 1089542 | 1377223 | 91799.9  | 2.118 | 5.8 | 0.6 | 12.2 | 1.5 | 0.5 | 1.38 | 0.90495 | 2640.6 | 30.0 | 2620.3 | 14.3 | 2604.7 | 11 | -1.4 |
| Spot 251 | 501558  | 633988  | 8664.5   | 3.406 | 7.5 | 0.9 | 6.6  | 3.0 | 0.4 | 2.83 | 0.95602 | 1988.7 | 48.5 | 2057.9 | 26.1 | 2127.8 | 15 | 6.5  |
| Spot 253 | 1443281 | 1824363 | 87089.4  | 1.656 | 5.5 | 0.6 | 13.4 | 1.3 | 0.5 | 1.17 | 0.87740 | 2726.6 | 26.0 | 2706.4 | 12.6 | 2691.3 | 11 | -1.3 |
| Spot 254 | 847688  | 1071510 | 60016.1  | 0.756 | 8.0 | 0.7 | 6.6  | 1.7 | 0.4 | 1.59 | 0.91401 | 2067.8 | 28.2 | 2056.6 | 15.4 | 2045.4 | 13 | -1.1 |
| Spot 255 | 971305  | 1227767 | 30925.2  | 2.485 | 5.6 | 0.9 | 13.0 | 2.9 | 0.5 | 2.74 | 0.95038 | 2703.9 | 60.6 | 2677.6 | 27.2 | 2657.8 | 15 | -1.7 |
| Spot 256 | 1282261 | 1620827 | 54047.3  | 2.102 | 5.5 | 0.9 | 13.1 | 1.9 | 0.5 | 1.73 | 0.88963 | 2695.6 | 38.0 | 2688.7 | 18.3 | 2683.4 | 15 | -0.5 |
| Spot 257 | 783238  | 990044  | 50542.3  | 1.461 | 7.3 | 1.0 | 7.7  | 1.6 | 0.4 | 1.21 | 0.76894 | 2179.1 | 22.3 | 2194.7 | 14.1 | 2209.3 | 17 | 1.4  |
| Spot 258 | 1136649 | 1436768 | 25417.3  | 2.009 | 8.7 | 1.0 | 5.6  | 1.8 | 0.4 | 1.43 | 0.80952 | 1938.3 | 23.9 | 1918.5 | 15.2 | 1897.0 | 19 | -2.2 |
| Spot 259 | 900124  | 1137792 | 99947.4  | 1.289 | 5.7 | 0.8 | 12.4 | 1.8 | 0.5 | 1.58 | 0.88220 | 2631.9 | 34.1 | 2632.9 | 16.8 | 2633.7 | 14 | 0.1  |
| Spot 260 | 2668022 | 3372483 | 31949.2  | 1.051 | 7.9 | 1.0 | 6.8  | 2.3 | 0.4 | 2.02 | 0.89223 | 2110.3 | 36.4 | 2091.0 | 20.1 | 2072.0 | 18 | -1.8 |
| Spot 261 | 828880  | 1047737 | 48403.0  | 1.879 | 5.5 | 0.8 | 13.5 | 1.4 | 0.5 | 1.19 | 0.82517 | 2743.8 | 26.5 | 2715.2 | 13.6 | 2693.9 | 13 | -1.9 |
| Spot 262 | 657957  | 831684  | 113680.2 | 1.885 | 7.1 | 0.8 | 7.2  | 3.7 | 0.4 | 3.63 | 0.97554 | 2014.1 | 62.9 | 2135.0 | 33.2 | 2253.4 | 14 | 10.6 |
| Spot 263 | 1086801 | 1373758 | 56173.0  | 2.405 | 5.5 | 0.8 | 13.4 | 1.3 | 0.5 | 1.01 | 0.78938 | 2721.5 | 22.3 | 2705.0 | 12.0 | 2692.7 | 13 | -1.1 |
| Spot 264 | 2328607 | 2943450 | 131374.7 | 1.683 | 5.6 | 0.7 | 13.3 | 1.6 | 0.5 | 1.42 | 0.89286 | 2754.1 | 31.9 | 2700.1 | 15.0 | 2659.9 | 12 | -3.5 |
| Spot 265 | 1948950 | 2463548 | 80230.1  | 2.360 | 5.1 | 0.7 | 15.4 | 1.2 | 0.6 | 0.92 | 0.78612 | 2893.5 | 21.3 | 2842.0 | 11.1 | 2805.6 | 12 | -3.1 |
| Spot 266 | 309089  | 390701  | 11023.0  | 0.955 | 5.4 | 0.9 | 13.3 | 2.1 | 0.5 | 1.91 | 0.90161 | 2707.8 | 42.1 | 2703.8 | 20.0 | 2700.9 | 15 | -0.3 |
| Spot 267 | 1582651 | 2000532 | 115155.2 | 1.825 | 8.4 | 0.7 | 6.1  | 1.8 | 0.4 | 1.61 | 0.90779 | 2015.6 | 27.9 | 1986.4 | 15.5 | 1956.1 | 13 | -3.0 |
| Spot 268 | 2039811 | 2578400 | 27330.7  | 1.864 | 5.5 | 0.7 | 13.1 | 1.2 | 0.5 | 1.01 | 0.82336 | 2685.8 | 22.2 | 2684.8 | 11.6 | 2684.0 | 12 | -0.1 |
| Spot 269 | 728647  | 921038  | 30544.6  | 2.176 | 5.5 | 0.8 | 13.2 | 1.5 | 0.5 | 1.21 | 0.82360 | 2715.6 | 26.9 | 2695.9 | 13.9 | 2681.3 | 14 | -1.3 |
| Spot 271 | 445114  | 562641  | 31835.0  | 1.133 | 7.6 | 1.0 | 6.6  | 3.7 | 0.4 | 3.53 | 0.96015 | 1995.6 | 60.6 | 2057.5 | 32.4 | 2120.1 | 18 | 5.9  |
| Spot 272 | 770941  | 974499  | 17513.0  | 2.070 | 7.2 | 0.6 | 8.2  | 1.5 | 0.4 | 1.34 | 0.90247 | 2286.7 | 25.8 | 2248.2 | 13.4 | 2213.4 | 11 | -3.3 |
| Spot 273 | 1059567 | 1339334 | 197917.0 | 2.068 | 5.5 | 0.7 | 13.4 | 1.3 | 0.5 | 1.11 | 0.83393 | 2732.7 | 24.7 | 2706.6 | 12.6 | 2687.2 | 12 | -1.7 |

|          |         |         |          |       |     |     |      |     |     |      |         |        |      |        |      |        |    |      |
|----------|---------|---------|----------|-------|-----|-----|------|-----|-----|------|---------|--------|------|--------|------|--------|----|------|
| Spot 274 | 787875  | 995905  | 698712.1 | 2.020 | 7.7 | 0.9 | 6.9  | 1.5 | 0.4 | 1.20 | 0.80225 | 2084.3 | 21.3 | 2095.9 | 13.2 | 2107.2 | 16 | 1.1  |
| Spot 275 | 2350760 | 2971451 | 93878.2  | 1.676 | 5.6 | 0.7 | 12.9 | 1.5 | 0.5 | 1.32 | 0.88946 | 2698.9 | 29.2 | 2669.3 | 14.0 | 2646.9 | 11 | -2.0 |
| Spot 276 | 384874  | 486496  | 31232.6  | 3.283 | 7.6 | 1.2 | 6.3  | 4.4 | 0.3 | 4.19 | 0.95944 | 1905.9 | 69.1 | 2019.6 | 38.3 | 2137.9 | 22 | 10.9 |
| Spot 278 | 240017  | 303391  | 1957.0   | 1.746 | 7.3 | 2.5 | 6.9  | 3.2 | 0.4 | 2.02 | 0.62471 | 2071.0 | 35.8 | 2099.6 | 28.7 | 2127.6 | 44 | 2.7  |
| Spot 279 | 1102111 | 1393110 | 21627.3  | 2.705 | 8.8 | 0.8 | 5.5  | 2.7 | 0.3 | 2.54 | 0.95394 | 1925.8 | 42.4 | 1901.4 | 22.9 | 1874.8 | 14 | -2.7 |
| Spot 280 | 754585  | 953825  | 17375.5  | 2.429 | 5.5 | 0.9 | 13.2 | 1.6 | 0.5 | 1.36 | 0.84151 | 2688.0 | 30.0 | 2691.5 | 15.3 | 2694.2 | 14 | 0.2  |
| Spot 281 | 1281258 | 1619560 | 22020.0  | 1.508 | 8.1 | 0.7 | 6.4  | 1.6 | 0.4 | 1.37 | 0.87612 | 2053.4 | 24.1 | 2031.5 | 13.7 | 2009.2 | 13 | -2.2 |
| Spot 282 | 1016209 | 1284528 | 38489.8  | 1.531 | 7.8 | 0.9 | 7.2  | 1.6 | 0.4 | 1.31 | 0.80983 | 2169.4 | 24.1 | 2133.3 | 14.4 | 2098.7 | 17 | -3.4 |
| Spot 283 | 853059  | 1078300 | 12283.6  | 1.479 | 7.6 | 0.9 | 6.3  | 3.7 | 0.3 | 3.63 | 0.96863 | 1913.4 | 60.1 | 2017.9 | 32.9 | 2126.5 | 16 | 10.0 |
| Spot 284 | 545565  | 689616  | 18521.6  | 1.828 | 7.6 | 1.0 | 7.0  | 1.8 | 0.4 | 1.41 | 0.79987 | 2082.7 | 25.0 | 2109.5 | 15.6 | 2135.7 | 18 | 2.5  |
| Spot 285 | 2277797 | 2879224 | 44776.6  | 2.676 | 7.8 | 0.6 | 6.9  | 1.2 | 0.4 | 1.07 | 0.85777 | 2118.1 | 19.3 | 2102.3 | 11.1 | 2086.9 | 11 | -1.5 |
| Spot 286 | 1755619 | 2219171 | 81390.4  | 0.770 | 5.5 | 0.7 | 13.5 | 1.8 | 0.5 | 1.67 | 0.91778 | 2740.1 | 37.4 | 2714.5 | 17.2 | 2695.5 | 12 | -1.7 |
| Spot 287 | 448159  | 566490  | 48382.8  | 2.778 | 7.4 | 0.8 | 6.9  | 3.3 | 0.4 | 3.16 | 0.96942 | 1995.1 | 54.3 | 2094.8 | 28.9 | 2194.2 | 14 | 9.1  |
| Spot 288 | 204526  | 258528  | 2862.5   | 1.764 | 7.4 | 1.6 | 6.8  | 2.8 | 0.4 | 2.21 | 0.80216 | 2033.1 | 38.5 | 2084.8 | 24.4 | 2136.3 | 29 | 4.8  |
| Spot 289 | 294430  | 372171  | 5600.7   | 1.303 | 5.0 | 0.9 | 14.8 | 1.7 | 0.5 | 1.43 | 0.84883 | 2761.4 | 32.2 | 2804.7 | 16.1 | 2835.9 | 15 | 2.6  |
| Spot 290 | 440999  | 557440  | 30880.8  | 2.148 | 7.2 | 1.1 | 7.6  | 2.0 | 0.4 | 1.73 | 0.84449 | 2134.9 | 31.4 | 2187.1 | 18.3 | 2236.3 | 19 | 4.5  |
| Spot 291 | 1347783 | 1703650 | 57360.2  | 2.180 | 5.5 | 0.8 | 13.5 | 1.4 | 0.5 | 1.21 | 0.84694 | 2750.6 | 27.2 | 2715.0 | 13.5 | 2688.6 | 13 | -2.3 |
| Spot 292 | 193859  | 245046  | 2641.1   | 2.416 | 6.1 | 1.2 | 10.5 | 2.2 | 0.5 | 1.78 | 0.80534 | 2465.0 | 36.4 | 2476.2 | 20.5 | 2485.4 | 22 | 0.8  |
| Spot 293 | 789257  | 997651  | 9564.4   | 1.768 | 6.2 | 3.1 | 8.7  | 3.4 | 0.4 | 1.38 | 0.40295 | 2126.2 | 25.0 | 2310.7 | 31.3 | 2477.9 | 53 | 14.2 |
| Spot 294 | 2370629 | 2996567 | 47812.2  | 4.681 | 5.3 | 0.6 | 14.7 | 1.3 | 0.6 | 1.16 | 0.87557 | 2863.3 | 26.8 | 2799.2 | 12.6 | 2753.4 | 10 | -4.0 |
| Spot 296 | 993661  | 1256026 | 13916.0  | 1.209 | 8.8 | 0.9 | 5.2  | 1.8 | 0.3 | 1.54 | 0.85963 | 1837.1 | 24.6 | 1857.0 | 15.2 | 1879.4 | 16 | 2.3  |
| Spot 297 | 893514  | 1129436 | 33450.0  | 1.745 | 7.8 | 0.8 | 6.8  | 2.0 | 0.4 | 1.77 | 0.90104 | 2061.7 | 31.2 | 2081.7 | 17.3 | 2101.5 | 15 | 1.9  |
| Spot 298 | 1391323 | 1758687 | 33014.8  | 1.031 | 8.8 | 0.7 | 5.7  | 1.5 | 0.4 | 1.33 | 0.87198 | 1966.4 | 22.6 | 1926.6 | 13.2 | 1884.1 | 13 | -4.4 |
| Spot 299 | 209616  | 264963  | 5470.4   | 2.566 | 7.3 | 1.5 | 7.5  | 2.3 | 0.4 | 1.68 | 0.73727 | 2164.5 | 31.0 | 2176.6 | 20.5 | 2187.9 | 27 | 1.1  |
| Spot 300 | 600148  | 758611  | 16410.9  | 2.057 | 5.5 | 0.8 | 13.2 | 1.4 | 0.5 | 1.07 | 0.78333 | 2691.2 | 23.5 | 2691.0 | 12.8 | 2690.9 | 14 | 0.0  |
| Spot 301 | 820375  | 1036986 | 27394.9  | 0.710 | 6.8 | 0.8 | 8.7  | 1.6 | 0.4 | 1.42 | 0.87982 | 2293.5 | 27.4 | 2309.7 | 14.7 | 2324.0 | 13 | 1.3  |
| Spot 302 | 329405  | 416380  | 13841.3  | 0.718 | 5.7 | 1.1 | 12.8 | 1.7 | 0.5 | 1.32 | 0.76604 | 2717.5 | 29.4 | 2666.4 | 16.3 | 2627.8 | 18 | -3.4 |
| Spot 303 | 800930  | 1012407 | 340616.2 | 2.904 | 7.5 | 0.9 | 7.1  | 2.7 | 0.4 | 2.58 | 0.93996 | 2092.3 | 46.1 | 2126.2 | 24.4 | 2159.1 | 16 | 3.1  |
| Spot 304 | 1361536 | 1721034 | 36322.7  | 1.678 | 5.6 | 0.9 | 12.9 | 1.6 | 0.5 | 1.33 | 0.84059 | 2675.2 | 29.0 | 2669.5 | 14.9 | 2665.3 | 14 | -0.4 |
| Spot 305 | 708661  | 895774  | 161322.8 | 2.492 | 7.6 | 1.0 | 7.2  | 1.7 | 0.4 | 1.33 | 0.78547 | 2139.8 | 24.2 | 2139.3 | 15.1 | 2138.8 | 18 | 0.0  |
| Spot 306 | 492174  | 622127  | 7625.1   | 1.617 | 8.6 | 1.0 | 5.4  | 1.8 | 0.3 | 1.46 | 0.82706 | 1857.7 | 23.6 | 1879.0 | 15.1 | 1902.6 | 18 | 2.4  |
| Spot 307 | 1252380 | 1583057 | 39796.1  | 2.213 | 5.4 | 0.7 | 13.8 | 1.4 | 0.5 | 1.20 | 0.85485 | 2734.3 | 26.7 | 2734.7 | 13.3 | 2734.9 | 12 | 0.0  |
| Spot 308 | 1070867 | 1353617 | 38813.3  | 2.580 | 5.0 | 0.9 | 15.9 | 1.6 | 0.6 | 1.37 | 0.83311 | 2910.7 | 32.1 | 2869.9 | 15.7 | 2841.4 | 15 | -2.4 |
| Spot 309 | 894055  | 1130121 | 132505.7 | 3.218 | 5.1 | 1.2 | 15.3 | 1.9 | 0.6 | 1.51 | 0.77760 | 2879.1 | 35.1 | 2836.7 | 18.5 | 2806.8 | 20 | -2.6 |
| Spot 310 | 388254  | 490769  | 5644.5   | 1.180 | 7.5 | 1.7 | 7.0  | 2.2 | 0.4 | 1.35 | 0.61158 | 2095.2 | 24.1 | 2115.0 | 19.6 | 2134.4 | 30 | 1.8  |
| Spot 311 | 1148072 | 1451207 | 36126.3  | 1.867 | 7.4 | 0.8 | 7.8  | 1.6 | 0.4 | 1.39 | 0.86078 | 2230.7 | 26.2 | 2204.6 | 14.5 | 2180.5 | 14 | -2.3 |
| Spot 312 | 770567  | 974027  | 48866.0  | 2.147 | 7.4 | 0.9 | 7.4  | 1.4 | 0.4 | 1.03 | 0.76168 | 2128.0 | 18.7 | 2156.3 | 12.1 | 2183.4 | 15 | 2.5  |
| Spot 313 | 1415950 | 1789816 | 47067.3  | 1.799 | 5.6 | 0.8 | 13.0 | 1.3 | 0.5 | 0.96 | 0.76587 | 2716.7 | 21.3 | 2677.8 | 11.8 | 2648.6 | 13 | -2.6 |
| Spot 314 | 938138  | 1185842 | 75009.3  | 2.627 | 5.5 | 1.1 | 13.7 | 1.8 | 0.5 | 1.41 | 0.78887 | 2767.2 | 31.7 | 2729.3 | 16.9 | 2701.3 | 18 | -2.4 |
| Spot 315 | 428576  | 541737  | 18538.7  | 1.168 | 3.5 | 0.9 | 26.9 | 1.5 | 0.7 | 1.18 | 0.80145 | 3306.8 | 30.4 | 3380.7 | 14.4 | 3424.8 | 14 | 3.4  |

**Run 1 (discordant Sept 2021)**

|          |        |        |          |       |      |     |     |      |     |       |         |        |       |        |       |        |     |       |
|----------|--------|--------|----------|-------|------|-----|-----|------|-----|-------|---------|--------|-------|--------|-------|--------|-----|-------|
| Spot 1   | 449477 | 568156 | 179767.1 | 1.754 | 10.8 | 5.9 | 6.4 | 30.6 | 0.5 | 30.00 | 0.98133 | 2630.1 | 650.1 | 2036.9 | 275.2 | 1480.1 | 112 | -77.7 |
| Spot 124 | 650601 | 822385 | 34789.7  | 1.884 | 8.2  | 7.7 | 6.6 | 16.0 | 0.4 | 14.06 | 0.87704 | 2140.3 | 256.2 | 2060.7 | 142.3 | 1982.0 | 137 | -8.0  |

|          |         |         |          |       |      |      |      |      |     |       |         |        |       |        |       |        |     |       |
|----------|---------|---------|----------|-------|------|------|------|------|-----|-------|---------|--------|-------|--------|-------|--------|-----|-------|
| Spot 14  | 330171  | 417349  | 4348.0   | 1.124 | 5.8  | 7.6  | 12.9 | 10.5 | 0.5 | 7.24  | 0.68770 | 2771.8 | 163.2 | 2669.1 | 99.6  | 2592.2 | 128 | -6.9  |
| Spot 156 | 738718  | 933768  | 34539.7  | 1.073 | 7.8  | 6.1  | 6.5  | 10.3 | 0.4 | 8.29  | 0.80376 | 2038.3 | 144.9 | 2051.2 | 91.1  | 2064.2 | 108 | 1.3   |
| Spot 170 | 452937  | 572530  | 203556.7 | 2.127 | 7.9  | 8.1  | 7.4  | 12.9 | 0.4 | 10.07 | 0.77970 | 2255.9 | 191.7 | 2155.2 | 115.9 | 2060.6 | 143 | -9.5  |
| Spot 173 | 585605  | 740228  | 27271.0  | 2.557 | 7.8  | 1.0  | 7.2  | 2.1  | 0.4 | 1.87  | 0.88630 | 2194.6 | 34.8  | 2135.8 | 18.8  | 2079.7 | 17  | -5.5  |
| Spot 181 | 426442  | 539040  | 32393.8  | 1.830 | 6.6  | 7.8  | 10.0 | 8.1  | 0.5 | 2.33  | 0.28697 | 2508.2 | 48.3  | 2434.2 | 75.0  | 2373.0 | 133 | -5.7  |
| Spot 186 | 803787  | 1016017 | 67035.0  | 2.463 | 5.8  | 2.9  | 19.4 | 13.2 | 0.8 | 12.86 | 0.97598 | 3861.4 | 374.1 | 3063.1 | 127.9 | 2574.7 | 48  | -50.0 |
| Spot 198 | 124018  | 156764  | 6630.0   | 1.704 | 4.9  | 13.0 | 20.1 | 24.8 | 0.7 | 21.10 | 0.85139 | 3490.4 | 570.2 | 3093.8 | 244.3 | 2845.6 | 213 | -22.7 |
| Spot 21  | 1254402 | 1585613 | 29613.0  | 1.913 | 5.5  | 0.9  | 13.6 | 1.5  | 0.5 | 1.21  | 0.79582 | 2801.7 | 27.5  | 2720.3 | 14.4  | 2660.3 | 15  | -5.3  |
| Spot 211 | 1429252 | 1806630 | 36027.5  | 2.240 | 8.7  | 0.8  | 5.8  | 1.2  | 0.4 | 0.96  | 0.78246 | 2019.9 | 16.6  | 1946.0 | 10.6  | 1868.2 | 14  | -8.1  |
| Spot 236 | 657769  | 831445  | 33482.0  | 1.190 | 8.3  | 7.6  | 6.8  | 13.9 | 0.4 | 11.59 | 0.83462 | 2213.9 | 217.2 | 2085.5 | 123.5 | 1961.0 | 137 | -12.9 |
| Spot 246 | 2507746 | 3169888 | 182298.6 | 1.665 | 5.7  | 0.8  | 13.1 | 1.8  | 0.5 | 1.61  | 0.88737 | 2780.9 | 36.3  | 2687.7 | 17.1  | 2618.4 | 14  | -6.2  |
| Spot 248 | 456146  | 576586  | 7365.5   | 2.978 | 7.8  | 3.9  | 7.1  | 6.3  | 0.4 | 4.97  | 0.79069 | 2192.4 | 92.4  | 2128.2 | 56.1  | 2066.7 | 68  | -6.1  |
| Spot 252 | 144300  | 182401  | 17393.1  | 1.171 | 21.2 | 0.8  | 6.6  | 1.3  | 1.0 | 0.97  | 0.76681 | 4502.2 | 31.5  | 2055.7 | 11.2  | 57.8   | 19  | ####  |
| Spot 26  | 150687  | 190475  | 3400.8   | 1.286 | 8.8  | 2.1  | 6.1  | 3.6  | 0.4 | 2.86  | 0.80400 | 2127.2 | 51.8  | 1993.8 | 31.1  | 1858.2 | 38  | -14.5 |
| Spot 270 | 1541845 | 1948952 | 66080.6  | 1.687 | 7.6  | 0.8  | 7.6  | 1.6  | 0.4 | 1.41  | 0.87624 | 2234.9 | 26.6  | 2179.6 | 14.4  | 2127.9 | 14  | -5.0  |
| Spot 277 | 196742  | 248689  | 8471.6   | 1.288 | 8.1  | 6.8  | 6.7  | 12.1 | 0.4 | 10.00 | 0.82873 | 2139.0 | 182.0 | 2067.4 | 106.9 | 1996.8 | 120 | -7.1  |
| Spot 295 | 257325  | 325269  | 6955.6   | 2.217 | 8.0  | 5.0  | 7.2  | 8.6  | 0.4 | 7.01  | 0.81335 | 2234.9 | 132.4 | 2132.5 | 76.9  | 2035.2 | 89  | -9.8  |
| Spot 30  | 99728   | 126060  | 1419.6   | 5.509 | 7.9  | 1.6  | 6.9  | 2.3  | 0.4 | 1.67  | 0.71706 | 2157.0 | 30.7  | 2102.3 | 20.7  | 2049.1 | 29  | -5.3  |
| Spot 67  | 27475   | 34729   | 1000.0   | 3.606 | 5.1  | 1.0  | 27.4 | 1.2  | 1.0 | 0.60  | 0.51417 | 4529.7 | 19.5  | 3399.2 | 11.4  | 2786.9 | 16  | -62.5 |
| Spot 9   | 1021575 | 1291311 | 30187.7  | 1.975 | 7.9  | 0.9  | 7.0  | 1.6  | 0.4 | 1.35  | 0.83576 | 2178.4 | 25.0  | 2116.6 | 14.4  | 2057.0 | 16  | -5.9  |

**Run 1 (Nov.)**

|         |         |         |          |       |     |     |      |     |     |      |         |        |      |        |      |        |    |      |
|---------|---------|---------|----------|-------|-----|-----|------|-----|-----|------|---------|--------|------|--------|------|--------|----|------|
| Spot 1  | 751171  | 740588  | 350334.3 | 1.924 | 7.5 | 0.6 | 7.2  | 1.3 | 0.4 | 1.11 | 0.86466 | 2146.5 | 20.3 | 2140.0 | 11.5 | 2133.7 | 11 | -0.6 |
| Spot 2  | 1820151 | 1794507 | 151108.3 | 2.084 | 5.3 | 0.6 | 12.9 | 1.0 | 0.5 | 0.87 | 0.83877 | 2633.2 | 18.9 | 2675.2 | 9.8  | 2707.1 | 9  | 2.7  |
| Spot 3  | 557270  | 549419  | 122018.2 | 2.211 | 7.5 | 0.7 | 7.1  | 1.3 | 0.4 | 1.03 | 0.81700 | 2129.0 | 18.7 | 2129.7 | 11.2 | 2130.4 | 13 | 0.1  |
| Spot 4  | 815927  | 804432  | 104682.3 | 3.220 | 7.6 | 0.7 | 7.3  | 1.1 | 0.4 | 0.85 | 0.77678 | 2185.0 | 15.8 | 2150.8 | 9.8  | 2118.4 | 12 | -3.1 |
| Spot 5  | 518526  | 511221  | 30807.1  | 1.530 | 7.2 | 0.9 | 7.7  | 1.4 | 0.4 | 1.14 | 0.79753 | 2180.4 | 21.1 | 2193.4 | 12.8 | 2205.6 | 15 | 1.1  |
| Spot 6  | 999276  | 985198  | 114734.6 | 1.617 | 5.8 | 0.7 | 11.5 | 1.1 | 0.5 | 0.84 | 0.77493 | 2566.1 | 17.8 | 2565.4 | 10.1 | 2564.9 | 11 | 0.0  |
| Spot 7  | 671957  | 662490  | 57908.0  | 1.866 | 7.5 | 0.9 | 7.2  | 1.3 | 0.4 | 1.01 | 0.76444 | 2144.8 | 18.5 | 2137.2 | 11.8 | 2130.0 | 15 | -0.7 |
| Spot 8  | 464108  | 457569  | 38534.1  | 0.551 | 7.9 | 0.6 | 6.5  | 1.1 | 0.4 | 0.94 | 0.83368 | 2048.6 | 16.4 | 2039.8 | 9.9  | 2030.9 | 11 | -0.9 |
| Spot 9  | 1513927 | 1492598 | 328016.2 | 2.276 | 5.4 | 0.6 | 13.4 | 1.1 | 0.5 | 0.93 | 0.83645 | 2726.6 | 20.6 | 2709.3 | 10.5 | 2696.4 | 10 | -1.1 |
| Spot 10 | 765716  | 754928  | 114898.7 | 3.548 | 7.4 | 0.7 | 7.5  | 1.2 | 0.4 | 0.95 | 0.82135 | 2197.3 | 17.7 | 2175.7 | 10.4 | 2155.3 | 12 | -1.9 |
| Spot 11 | 1452722 | 1432255 | 259603.9 | 1.257 | 7.8 | 0.6 | 6.8  | 1.0 | 0.4 | 0.87 | 0.83355 | 2115.1 | 15.7 | 2084.8 | 9.2  | 2055.0 | 10 | -2.9 |
| Spot 12 | 1775511 | 1750496 | 369214.9 | 1.181 | 7.6 | 0.5 | 6.9  | 1.0 | 0.4 | 0.83 | 0.85089 | 2093.4 | 14.9 | 2095.0 | 8.7  | 2096.6 | 9  | 0.2  |
| Spot 13 | 1310968 | 1292498 | 99421.8  | 2.803 | 5.3 | 0.6 | 13.1 | 1.1 | 0.5 | 0.96 | 0.84547 | 2660.9 | 20.8 | 2684.8 | 10.7 | 2702.9 | 10 | 1.6  |
| Spot 14 | 1475951 | 1455157 | 207821.5 | 2.265 | 7.6 | 0.4 | 7.2  | 1.0 | 0.4 | 0.91 | 0.91650 | 2151.9 | 16.6 | 2130.9 | 8.8  | 2110.8 | 7  | -1.9 |
| Spot 15 | 1818789 | 1793165 | 449641.4 | 1.221 | 6.4 | 0.7 | 9.7  | 1.3 | 0.5 | 1.05 | 0.83568 | 2418.6 | 21.2 | 2407.3 | 11.6 | 2397.7 | 12 | -0.9 |
| Spot 16 | 1123125 | 1107301 | 259864.5 | 1.814 | 7.4 | 0.6 | 7.3  | 1.1 | 0.4 | 0.94 | 0.84049 | 2159.7 | 17.2 | 2154.1 | 10.0 | 2148.7 | 11 | -0.5 |
| Spot 17 | 2004028 | 1975794 | 424772.4 | 1.900 | 7.2 | 0.5 | 7.7  | 1.1 | 0.4 | 1.01 | 0.87846 | 2201.2 | 18.8 | 2201.4 | 10.3 | 2201.6 | 10 | 0.0  |
| Spot 18 | 518611  | 511304  | 99031.4  | 1.266 | 4.0 | 0.8 | 21.8 | 1.2 | 0.6 | 0.89 | 0.76167 | 3168.8 | 22.2 | 3175.3 | 11.3 | 3179.4 | 12 | 0.3  |
| Spot 19 | 267585  | 263815  | 52828.8  | 1.673 | 4.0 | 0.8 | 22.5 | 1.5 | 0.7 | 1.20 | 0.82177 | 3250.6 | 30.7 | 3203.6 | 14.2 | 3174.3 | 13 | -2.4 |
| Spot 20 | 1124687 | 1108842 | 88982.6  | 1.695 | 7.4 | 0.6 | 7.5  | 1.0 | 0.4 | 0.76 | 0.78942 | 2205.4 | 14.2 | 2177.8 | 8.6  | 2151.9 | 10 | -2.5 |
| Spot 21 | 549484  | 541742  | 60080.5  | 1.671 | 7.5 | 0.7 | 7.0  | 1.0 | 0.4 | 0.77 | 0.74611 | 2093.4 | 13.7 | 2106.2 | 9.1  | 2118.7 | 12 | 1.2  |
| Spot 22 | 1321440 | 1302822 | 182119.7 | 1.038 | 5.8 | 0.6 | 11.7 | 1.0 | 0.5 | 0.85 | 0.81184 | 2575.8 | 18.1 | 2577.6 | 9.8  | 2579.1 | 10 | 0.1  |

|         |         |         |          |       |     |     |      |     |     |      |         |        |      |        |      |        |    |      |
|---------|---------|---------|----------|-------|-----|-----|------|-----|-----|------|---------|--------|------|--------|------|--------|----|------|
| Spot 23 | 870266  | 858005  | 99661.7  | 1.939 | 7.5 | 0.6 | 7.3  | 1.0 | 0.4 | 0.83 | 0.78744 | 2166.8 | 15.2 | 2144.7 | 9.4  | 2123.5 | 11 | -2.0 |
| Spot 24 | 747828  | 737292  | #####    | 1.589 | 5.4 | 0.6 | 13.2 | 1.2 | 0.5 | 1.02 | 0.86347 | 2706.3 | 22.6 | 2697.3 | 11.2 | 2690.6 | 10 | -0.6 |
| Spot 25 | 915684  | 902784  | 192568.7 | 3.190 | 7.4 | 0.9 | 7.5  | 1.3 | 0.4 | 0.88 | 0.69537 | 2186.4 | 16.3 | 2170.5 | 11.3 | 2155.6 | 16 | -1.4 |
| Spot 26 | 361807  | 356710  | 23479.3  | 2.066 | 7.4 | 0.9 | 7.4  | 1.5 | 0.4 | 1.12 | 0.76526 | 2186.5 | 20.7 | 2163.1 | 13.1 | 2140.9 | 16 | -2.1 |
| Spot 27 | 1621780 | 1598931 | 125627.1 | 1.861 | 7.5 | 0.7 | 7.3  | 1.2 | 0.4 | 0.98 | 0.82800 | 2168.7 | 18.0 | 2152.4 | 10.5 | 2136.8 | 12 | -1.5 |
| Spot 28 | 429156  | 423110  | 94485.6  | 2.033 | 7.4 | 0.6 | 7.7  | 0.9 | 0.4 | 0.64 | 0.74999 | 2247.1 | 12.2 | 2198.4 | 7.7  | 2153.2 | 10 | -4.4 |
| Spot 29 | 1101995 | 1086469 | 169927.9 | 2.608 | 7.3 | 0.8 | 7.7  | 1.3 | 0.4 | 1.07 | 0.80253 | 2215.4 | 20.1 | 2200.3 | 12.0 | 2186.2 | 14 | -1.3 |
| Spot 30 | 1310330 | 1291869 | 201287.2 | 2.398 | 5.4 | 0.6 | 13.3 | 0.9 | 0.5 | 0.65 | 0.74112 | 2704.8 | 14.4 | 2698.9 | 8.3  | 2694.5 | 10 | -0.4 |
| Spot 31 | 223160  | 220016  | 59961.9  | 1.528 | 5.4 | 0.9 | 13.1 | 1.4 | 0.5 | 1.11 | 0.76791 | 2671.1 | 24.3 | 2685.3 | 13.7 | 2696.1 | 15 | 0.9  |
| Spot 32 | 994335  | 980326  | 172510.8 | 1.990 | 4.6 | 0.7 | 17.5 | 1.1 | 0.6 | 0.86 | 0.79743 | 2946.4 | 20.4 | 2960.4 | 10.4 | 2970.0 | 11 | 0.8  |
| Spot 33 | 1263042 | 1245248 | 232559.0 | 2.829 | 7.1 | 0.7 | 7.8  | 1.3 | 0.4 | 1.14 | 0.85888 | 2186.2 | 21.1 | 2206.7 | 11.9 | 2225.7 | 12 | 1.8  |
| Spot 34 | 617900  | 609195  | 116874.3 | 3.719 | 7.5 | 0.7 | 7.5  | 1.0 | 0.4 | 0.64 | 0.67051 | 2204.4 | 12.0 | 2171.4 | 8.6  | 2140.3 | 12 | -3.0 |
| Spot 35 | 2056785 | 2027808 | 913088.2 | 2.342 | 5.3 | 0.6 | 13.4 | 1.3 | 0.5 | 1.13 | 0.87406 | 2690.1 | 24.8 | 2707.1 | 12.2 | 2719.8 | 10 | 1.1  |
| Spot 36 | 931319  | 918198  | 101949.6 | 0.840 | 5.4 | 0.7 | 13.0 | 1.2 | 0.5 | 0.99 | 0.82535 | 2684.2 | 21.8 | 2679.2 | 11.4 | 2675.4 | 11 | -0.3 |
| Spot 37 | 1119672 | 1103898 | 155999.0 | 2.324 | 5.6 | 0.5 | 12.2 | 1.0 | 0.5 | 0.84 | 0.83873 | 2608.9 | 18.0 | 2618.6 | 9.4  | 2626.0 | 9  | 0.7  |
| Spot 38 | 1523871 | 1502402 | 82145.9  | 1.937 | 7.4 | 0.7 | 7.6  | 1.3 | 0.4 | 1.08 | 0.83709 | 2205.7 | 20.2 | 2183.1 | 11.6 | 2161.9 | 12 | -2.0 |
| Spot 39 | 1122108 | 1106300 | 100085.6 | 2.190 | 7.5 | 0.7 | 7.2  | 1.3 | 0.4 | 1.08 | 0.83739 | 2153.7 | 19.7 | 2140.2 | 11.5 | 2127.3 | 12 | -1.2 |
| Spot 40 | 588445  | 580155  | 853406.9 | 2.682 | 5.3 | 0.6 | 13.0 | 1.0 | 0.5 | 0.82 | 0.79458 | 2639.7 | 17.9 | 2682.1 | 9.8  | 2714.1 | 10 | 2.7  |
| Spot 41 | 4550451 | 4486342 | 130669.0 | 2.124 | 7.6 | 0.4 | 6.8  | 0.7 | 0.4 | 0.57 | 0.80447 | 2059.6 | 10.0 | 2085.6 | 6.3  | 2111.3 | 7  | 2.4  |
| Spot 42 | 976750  | 962989  | 254253.4 | 1.969 | 5.4 | 0.5 | 13.0 | 1.1 | 0.5 | 0.96 | 0.87187 | 2673.9 | 21.0 | 2679.1 | 10.4 | 2682.9 | 9  | 0.3  |
| Spot 43 | 1562984 | 1540964 | 113280.4 | 2.677 | 7.8 | 0.6 | 6.6  | 1.2 | 0.4 | 1.07 | 0.86448 | 2061.0 | 18.9 | 2060.0 | 11.0 | 2058.9 | 11 | -0.1 |
| Spot 44 | 475292  | 468595  | 64831.9  | 2.338 | 5.9 | 0.4 | 11.1 | 0.8 | 0.5 | 0.71 | 0.86935 | 2527.4 | 14.8 | 2534.1 | 7.6  | 2539.4 | 7  | 0.5  |
| Spot 45 | 1130450 | 1114523 | 429077.2 | 2.089 | 4.8 | 0.7 | 16.5 | 1.1 | 0.6 | 0.83 | 0.77977 | 2927.3 | 19.6 | 2908.7 | 10.2 | 2895.9 | 11 | -1.1 |
| Spot 46 | 603067  | 594571  | 127452.3 | 1.491 | 5.6 | 0.7 | 12.4 | 1.3 | 0.5 | 1.09 | 0.83660 | 2646.2 | 23.6 | 2637.5 | 12.2 | 2630.9 | 12 | -0.6 |
| Spot 47 | 1975809 | 1947973 | 385872.0 | 2.735 | 7.1 | 0.6 | 7.8  | 1.1 | 0.4 | 0.91 | 0.84543 | 2196.1 | 17.0 | 2207.6 | 9.7  | 2218.4 | 10 | 1.0  |
| Spot 48 | 1806587 | 1781135 | 559606.5 | 1.384 | 7.6 | 0.6 | 7.1  | 1.1 | 0.4 | 0.93 | 0.83207 | 2137.0 | 16.8 | 2125.8 | 9.9  | 2115.0 | 11 | -1.0 |
| Spot 49 | 1551965 | 1530100 | 260618.4 | 1.591 | 7.4 | 0.6 | 7.2  | 1.3 | 0.4 | 1.11 | 0.87673 | 2117.1 | 20.0 | 2139.4 | 11.3 | 2160.9 | 11 | 2.0  |
| Spot 50 | 1000335 | 986242  | 81984.5  | 2.478 | 7.4 | 0.6 | 7.3  | 1.0 | 0.4 | 0.83 | 0.79499 | 2146.6 | 15.1 | 2148.4 | 9.3  | 2150.0 | 11 | 0.2  |
| Spot 51 | 1612879 | 1590155 | 736583.2 | 2.863 | 4.3 | 0.7 | 18.8 | 0.9 | 0.6 | 0.58 | 0.62472 | 3015.9 | 13.9 | 3032.0 | 8.9  | 3042.6 | 12 | 0.9  |
| Spot 52 | 1249803 | 1232195 | 68323.8  | 1.726 | 8.5 | 0.8 | 5.5  | 1.3 | 0.3 | 0.98 | 0.77095 | 1903.8 | 16.1 | 1900.0 | 10.9 | 1895.9 | 15 | -0.4 |
| Spot 53 | 610269  | 601671  | 32231.1  | 1.534 | 7.5 | 0.8 | 7.1  | 1.2 | 0.4 | 0.87 | 0.74020 | 2117.3 | 15.7 | 2117.8 | 10.4 | 2118.2 | 14 | 0.0  |
| Spot 54 | 1004047 | 989902  | 73106.1  | 2.206 | 5.4 | 0.8 | 13.2 | 1.2 | 0.5 | 0.91 | 0.73241 | 2718.1 | 20.2 | 2696.0 | 11.7 | 2679.4 | 14 | -1.4 |
| Spot 55 | 1368911 | 1349625 | 89983.3  | 2.142 | 5.4 | 0.5 | 12.9 | 1.0 | 0.5 | 0.84 | 0.84070 | 2643.2 | 18.3 | 2669.9 | 9.5  | 2690.1 | 9  | 1.7  |
| Spot 56 | 1408739 | 1388892 | 156909.5 | 1.704 | 7.6 | 0.8 | 7.0  | 1.2 | 0.4 | 0.93 | 0.77630 | 2115.1 | 16.7 | 2110.8 | 10.6 | 2106.6 | 13 | -0.4 |
| Spot 57 | 1108022 | 1092411 | 170613.3 | 3.808 | 7.1 | 0.7 | 7.7  | 1.1 | 0.4 | 0.90 | 0.79074 | 2170.7 | 16.6 | 2199.5 | 10.3 | 2226.4 | 12 | 2.5  |
| Spot 58 | 1099785 | 1084290 | 439114.8 | 0.998 | 7.7 | 0.8 | 6.7  | 1.3 | 0.4 | 1.05 | 0.79984 | 2062.4 | 18.6 | 2073.3 | 11.6 | 2084.1 | 14 | 1.0  |
| Spot 59 | 699281  | 689429  | 459059.7 | 2.063 | 7.6 | 0.6 | 6.9  | 1.0 | 0.4 | 0.78 | 0.79494 | 2089.5 | 13.8 | 2102.3 | 8.7  | 2114.8 | 10 | 1.2  |
| Spot 60 | 1123671 | 1107840 | 137365.8 | 2.584 | 4.5 | 1.3 | 17.2 | 1.6 | 0.6 | 0.97 | 0.60335 | 2880.6 | 22.5 | 2948.2 | 15.4 | 2994.7 | 21 | 3.8  |
| Spot 61 | 2140250 | 2110097 | #####    | 2.114 | 7.5 | 0.5 | 7.1  | 0.9 | 0.4 | 0.71 | 0.81482 | 2128.0 | 12.9 | 2125.3 | 7.8  | 2122.6 | 9  | -0.3 |
| Spot 62 | 2314164 | 2281561 | 135022.3 | 2.036 | 8.5 | 0.8 | 5.5  | 1.6 | 0.3 | 1.38 | 0.85415 | 1878.6 | 22.4 | 1893.1 | 13.8 | 1909.0 | 15 | 1.6  |
| Spot 63 | 977988  | 964209  | 711802.7 | 3.016 | 7.6 | 0.7 | 7.0  | 1.4 | 0.4 | 1.20 | 0.86926 | 2118.5 | 21.7 | 2117.6 | 12.3 | 2116.7 | 12 | -0.1 |
| Spot 64 | 1697606 | 1673689 | 127077.4 | 1.366 | 8.5 | 0.5 | 5.5  | 0.9 | 0.3 | 0.78 | 0.82310 | 1896.3 | 12.8 | 1898.9 | 8.1  | 1901.7 | 10 | 0.3  |
| Spot 65 | 774553  | 763640  | 531799.5 | 1.996 | 7.3 | 0.6 | 7.4  | 1.0 | 0.4 | 0.84 | 0.82800 | 2163.3 | 15.4 | 2166.7 | 9.1  | 2169.8 | 10 | 0.3  |

|          |         |         |          |       |     |     |      |     |     |      |         |        |      |        |      |        |    |      |
|----------|---------|---------|----------|-------|-----|-----|------|-----|-----|------|---------|--------|------|--------|------|--------|----|------|
| Spot 66  | 899922  | 887243  | 141951.2 | 1.721 | 6.9 | 0.6 | 8.6  | 0.9 | 0.4 | 0.67 | 0.76351 | 2308.9 | 13.0 | 2296.3 | 8.0  | 2285.1 | 10 | -1.0 |
| Spot 67  | 1331502 | 1312743 | 270583.9 | 2.279 | 4.6 | 0.6 | 16.7 | 1.0 | 0.6 | 0.84 | 0.82169 | 2892.8 | 19.6 | 2919.3 | 9.8  | 2937.6 | 9  | 1.5  |
| Spot 68  | 173670  | 171224  | 16898.9  | 1.463 | 5.2 | 0.9 | 12.9 | 1.2 | 0.5 | 0.88 | 0.71441 | 2581.7 | 18.7 | 2674.8 | 11.6 | 2746.0 | 14 | 6.0  |
| Spot 69  | 1588692 | 1566310 | 579735.6 | 2.021 | 5.3 | 0.6 | 13.2 | 1.1 | 0.5 | 0.99 | 0.87341 | 2668.0 | 21.7 | 2694.5 | 10.7 | 2714.3 | 9  | 1.7  |
| Spot 70  | 756480  | 745823  | 158829.0 | 1.749 | 5.4 | 0.6 | 13.2 | 0.9 | 0.5 | 0.64 | 0.72041 | 2703.9 | 14.1 | 2694.7 | 8.4  | 2687.7 | 10 | -0.6 |
| Spot 71  | 562923  | 554992  | 101887.0 | 3.529 | 7.5 | 0.6 | 7.2  | 1.2 | 0.4 | 1.02 | 0.85085 | 2136.4 | 18.6 | 2133.5 | 10.7 | 2130.8 | 11 | -0.3 |
| Spot 72  | 1811651 | 1786127 | 232602.7 | 2.533 | 7.3 | 0.6 | 7.4  | 1.1 | 0.4 | 0.88 | 0.82150 | 2145.6 | 16.0 | 2155.3 | 9.5  | 2164.6 | 11 | 0.9  |
| Spot 73  | 1252950 | 1235298 | 127436.4 | 1.500 | 4.7 | 0.6 | 16.9 | 1.2 | 0.6 | 0.98 | 0.84021 | 2929.1 | 23.1 | 2928.3 | 11.2 | 2927.7 | 10 | 0.0  |
| Spot 74  | 96304   | 94947   | 11426.5  | 0.892 | 7.4 | 1.1 | 7.6  | 1.4 | 0.4 | 0.94 | 0.66041 | 2226.6 | 17.7 | 2179.2 | 12.8 | 2134.9 | 19 | -4.3 |
| Spot 75  | 1875986 | 1849556 | 240175.6 | 1.875 | 5.4 | 0.6 | 13.0 | 0.9 | 0.5 | 0.64 | 0.74670 | 2663.4 | 14.1 | 2680.3 | 8.1  | 2693.1 | 9  | 1.1  |
| Spot 76  | 90585   | 89309   | 28232.8  | 1.726 | 5.6 | 0.9 | 11.9 | 1.3 | 0.5 | 0.92 | 0.71329 | 2571.6 | 19.5 | 2597.5 | 12.1 | 2617.8 | 15 | 1.8  |
| Spot 77  | 1559372 | 1537403 | 138923.1 | 2.099 | 7.3 | 0.6 | 7.6  | 1.1 | 0.4 | 0.93 | 0.84779 | 2200.7 | 17.3 | 2185.5 | 9.8  | 2171.2 | 10 | -1.4 |
| Spot 78  | 311022  | 306640  | 25824.9  | 2.636 | 7.3 | 0.7 | 7.3  | 1.3 | 0.4 | 1.08 | 0.84690 | 2138.6 | 19.7 | 2150.7 | 11.4 | 2162.2 | 12 | 1.1  |
| Spot 79  | 1367170 | 1347908 | 356604.2 | 1.456 | 8.6 | 0.5 | 5.5  | 0.8 | 0.3 | 0.66 | 0.80841 | 1903.1 | 10.9 | 1897.7 | 7.1  | 1891.8 | 9  | -0.6 |
| Spot 80  | 1596720 | 1574225 | 127904.9 | 1.744 | 8.6 | 1.8 | 5.5  | 2.6 | 0.3 | 1.88 | 0.73237 | 1917.1 | 31.2 | 1898.7 | 22.1 | 1878.6 | 32 | -2.0 |
| Spot 81  | 1173495 | 1156962 | 96440.0  | 1.302 | 8.3 | 0.5 | 5.8  | 0.8 | 0.4 | 0.69 | 0.82428 | 1959.2 | 11.7 | 1952.7 | 7.3  | 1945.7 | 8  | -0.7 |
| Spot 82  | 1098771 | 1083291 | 120104.1 | 1.472 | 8.3 | 0.8 | 6.0  | 1.3 | 0.4 | 0.96 | 0.75856 | 1982.6 | 16.3 | 1971.0 | 11.0 | 1958.7 | 15 | -1.2 |
| Spot 83  | 1006472 | 992292  | #####    | 1.060 | 5.3 | 0.7 | 13.6 | 1.1 | 0.5 | 0.89 | 0.79254 | 2750.9 | 20.0 | 2724.7 | 10.7 | 2705.4 | 11 | -1.7 |
| Spot 84  | 344033  | 339186  | 50417.1  | 3.139 | 7.3 | 0.8 | 7.3  | 1.3 | 0.4 | 1.06 | 0.80550 | 2143.9 | 19.4 | 2152.7 | 11.8 | 2161.1 | 14 | 0.8  |
| Spot 85  | 1671137 | 1647593 | 776624.5 | 2.584 | 5.5 | 0.5 | 12.4 | 1.0 | 0.5 | 0.88 | 0.87075 | 2630.6 | 18.9 | 2637.5 | 9.5  | 2642.8 | 8  | 0.5  |
| Spot 86  | 1433315 | 1413122 | 183807.6 | 1.938 | 7.7 | 0.6 | 6.9  | 1.0 | 0.4 | 0.81 | 0.81203 | 2113.5 | 14.6 | 2097.5 | 8.8  | 2081.7 | 10 | -1.5 |
| Spot 87  | 2014787 | 1986402 | 547422.8 | 2.227 | 5.3 | 0.7 | 13.3 | 1.3 | 0.5 | 1.11 | 0.85321 | 2691.5 | 24.5 | 2698.3 | 12.3 | 2703.3 | 11 | 0.4  |
| Spot 88  | 585421  | 577173  | 99982.6  | 2.656 | 7.4 | 0.7 | 7.4  | 1.2 | 0.4 | 0.97 | 0.79472 | 2166.4 | 17.8 | 2162.2 | 10.9 | 2158.2 | 13 | -0.4 |
| Spot 89  | 830677  | 818974  | 49207.1  | 2.010 | 7.6 | 0.9 | 7.0  | 1.4 | 0.4 | 1.11 | 0.78587 | 2111.6 | 20.1 | 2107.7 | 12.6 | 2103.9 | 15 | -0.4 |
| Spot 90  | 205980  | 203078  | 20506.5  | 1.760 | 6.2 | 0.8 | 10.1 | 1.4 | 0.5 | 1.10 | 0.79634 | 2454.3 | 22.5 | 2447.1 | 12.8 | 2441.2 | 14 | -0.5 |
| Spot 91  | 469279  | 462667  | 47067.6  | 2.718 | 7.6 | 0.7 | 7.2  | 1.1 | 0.4 | 0.83 | 0.77058 | 2178.4 | 15.4 | 2142.2 | 9.6  | 2107.6 | 12 | -3.4 |
| Spot 92  | 1531031 | 1509461 | 371092.7 | 1.313 | 5.4 | 0.7 | 13.3 | 1.3 | 0.5 | 1.06 | 0.83587 | 2726.6 | 23.6 | 2703.8 | 12.0 | 2686.9 | 12 | -1.5 |
| Spot 93  | 629718  | 620846  | 91368.1  | 2.703 | 7.4 | 0.8 | 7.3  | 1.3 | 0.4 | 1.05 | 0.81056 | 2162.2 | 19.4 | 2154.8 | 11.6 | 2147.8 | 13 | -0.7 |
| Spot 94  | 363176  | 358059  | 59147.4  | 2.578 | 7.3 | 0.7 | 7.6  | 1.2 | 0.4 | 1.02 | 0.83378 | 2212.7 | 19.1 | 2187.5 | 11.0 | 2163.9 | 12 | -2.3 |
| Spot 95  | 1018959 | 1004603 | 153974.9 | 2.509 | 7.5 | 0.8 | 7.2  | 1.3 | 0.4 | 1.01 | 0.79077 | 2164.2 | 18.5 | 2139.9 | 11.4 | 2116.7 | 14 | -2.2 |
| Spot 96  | 1814774 | 1789207 | #####    | 1.453 | 7.2 | 0.5 | 7.6  | 0.9 | 0.4 | 0.77 | 0.82390 | 2170.2 | 14.2 | 2183.7 | 8.4  | 2196.5 | 9  | 1.2  |
| Spot 97  | 994297  | 980289  | 112548.6 | 1.847 | 5.4 | 0.5 | 13.3 | 1.1 | 0.5 | 0.92 | 0.86658 | 2705.4 | 20.4 | 2700.1 | 10.1 | 2696.2 | 9  | -0.3 |
| Spot 98  | 456110  | 449684  | 681592.3 | 1.128 | 7.8 | 1.1 | 6.8  | 1.6 | 0.4 | 1.13 | 0.70870 | 2093.5 | 20.2 | 2080.1 | 14.1 | 2066.8 | 20 | -1.3 |
| Spot 99  | 1346955 | 1327979 | 105054.8 | 2.045 | 7.5 | 0.4 | 7.4  | 0.9 | 0.4 | 0.77 | 0.88026 | 2199.5 | 14.4 | 2165.9 | 7.9  | 2134.2 | 7  | -3.1 |
| Spot 100 | 538476  | 530889  | 72652.7  | 2.533 | 7.2 | 0.8 | 7.8  | 1.2 | 0.4 | 0.93 | 0.77205 | 2227.8 | 17.6 | 2213.5 | 10.9 | 2200.3 | 13 | -1.2 |
| Spot 101 | 1112180 | 1096511 | 278866.9 | 1.818 | 7.7 | 0.7 | 6.8  | 1.2 | 0.4 | 1.01 | 0.80698 | 2085.1 | 17.9 | 2086.2 | 11.1 | 2087.3 | 13 | 0.1  |
| Spot 102 | 353078  | 348104  | 91029.8  | 0.816 | 7.6 | 1.0 | 6.7  | 1.5 | 0.4 | 1.07 | 0.72645 | 2038.7 | 18.8 | 2069.9 | 13.1 | 2101.0 | 18 | 3.0  |
| Spot 103 | 598579  | 590145  | 136924.9 | 2.338 | 7.4 | 0.6 | 7.5  | 1.2 | 0.4 | 0.97 | 0.83915 | 2196.1 | 18.0 | 2171.1 | 10.3 | 2147.5 | 11 | -2.3 |
| Spot 104 | 1214871 | 1197755 | 381575.7 | 1.252 | 8.5 | 0.5 | 5.6  | 0.9 | 0.3 | 0.76 | 0.85610 | 1918.3 | 12.6 | 1908.4 | 7.6  | 1897.7 | 8  | -1.1 |
| Spot 105 | 775102  | 764182  | 46916.5  | 1.762 | 7.3 | 0.9 | 7.7  | 1.4 | 0.4 | 1.13 | 0.79692 | 2235.5 | 21.4 | 2200.5 | 12.8 | 2168.1 | 15 | -3.1 |
| Spot 106 | 764025  | 753261  | 54663.1  | 1.876 | 7.1 | 0.7 | 7.7  | 1.3 | 0.4 | 1.14 | 0.85590 | 2176.3 | 21.1 | 2194.9 | 12.0 | 2212.3 | 12 | 1.6  |
| Spot 107 | 512046  | 504832  | 104552.4 | 1.417 | 5.4 | 0.6 | 13.1 | 1.0 | 0.5 | 0.78 | 0.81038 | 2700.7 | 17.2 | 2684.2 | 9.1  | 2671.9 | 9  | -1.1 |
| Spot 108 | 1740151 | 1715635 | 140094.6 | 1.935 | 5.3 | 0.6 | 13.1 | 1.1 | 0.5 | 0.92 | 0.83420 | 2667.4 | 20.2 | 2686.5 | 10.5 | 2701.0 | 10 | 1.2  |



|          |         |         |          |       |     |     |      |     |     |      |         |        |      |        |      |        |    |      |
|----------|---------|---------|----------|-------|-----|-----|------|-----|-----|------|---------|--------|------|--------|------|--------|----|------|
| Spot 109 | 1751820 | 1727139 | 101586.7 | 1.799 | 7.2 | 0.6 | 7.6  | 1.1 | 0.4 | 0.90 | 0.82073 | 2186.7 | 16.7 | 2188.1 | 9.9  | 2189.4 | 11 | 0.1  |
| Spot 110 | 544595  | 536922  | 72482.4  | 0.871 | 7.5 | 0.7 | 7.2  | 1.2 | 0.4 | 1.01 | 0.80674 | 2138.1 | 18.3 | 2133.6 | 11.1 | 2129.2 | 13 | -0.4 |
| Spot 111 | 1111155 | 1095501 | 107713.2 | 1.736 | 7.3 | 0.7 | 7.2  | 1.3 | 0.4 | 1.08 | 0.83227 | 2116.6 | 19.5 | 2138.6 | 11.6 | 2159.8 | 13 | 2.0  |
| Spot 112 | 830371  | 818673  | 171669.9 | 1.831 | 7.2 | 0.7 | 7.6  | 1.2 | 0.4 | 0.94 | 0.78410 | 2188.3 | 17.5 | 2190.4 | 10.8 | 2192.4 | 13 | 0.2  |
| Spot 113 | 534462  | 526932  | 211480.1 | 1.666 | 3.7 | 0.7 | 24.6 | 1.1 | 0.7 | 0.86 | 0.76271 | 3279.4 | 22.2 | 3294.0 | 11.0 | 3302.9 | 11 | 0.7  |
| Spot 114 | 1904176 | 1877349 | 103589.3 | 1.383 | 7.6 | 0.5 | 6.9  | 1.0 | 0.4 | 0.81 | 0.84954 | 2101.9 | 14.6 | 2102.1 | 8.5  | 2102.4 | 9  | 0.0  |
| Spot 115 | 1201260 | 1184336 | 97952.3  | 0.698 | 7.9 | 0.7 | 6.7  | 1.1 | 0.4 | 0.90 | 0.79949 | 2100.8 | 16.1 | 2072.2 | 9.9  | 2043.9 | 12 | -2.8 |
| Spot 116 | 1539104 | 1517421 | 82504.1  | 1.577 | 8.5 | 0.7 | 5.4  | 1.0 | 0.3 | 0.78 | 0.76244 | 1879.6 | 12.7 | 1887.6 | 8.7  | 1896.4 | 12 | 0.9  |
| Spot 117 | 1341525 | 1322624 | #####    | 2.911 | 7.8 | 0.6 | 6.7  | 1.2 | 0.4 | 1.01 | 0.84319 | 2077.8 | 17.9 | 2072.0 | 10.6 | 2066.2 | 11 | -0.6 |
| Spot 118 | 1374918 | 1355548 | 82251.3  | 2.198 | 5.3 | 0.7 | 13.4 | 1.1 | 0.5 | 0.87 | 0.77865 | 2715.0 | 19.2 | 2710.4 | 10.5 | 2707.0 | 12 | -0.3 |
| Spot 119 | 2558899 | 2522848 | 292253.6 | 1.718 | 5.3 | 0.6 | 13.1 | 0.9 | 0.5 | 0.70 | 0.77936 | 2660.9 | 15.2 | 2683.9 | 8.4  | 2701.3 | 9  | 1.5  |
| Spot 120 | 1496313 | 1475232 | #####    | 1.677 | 8.6 | 0.7 | 5.4  | 1.1 | 0.3 | 0.91 | 0.79602 | 1874.4 | 14.8 | 1878.5 | 9.8  | 1883.1 | 12 | 0.5  |
| Spot 121 | 2043641 | 2014849 | 187756.8 | 1.979 | 8.5 | 0.6 | 5.4  | 1.1 | 0.3 | 0.92 | 0.84930 | 1870.8 | 14.9 | 1889.7 | 9.3  | 1910.5 | 10 | 2.1  |
| Spot 122 | 861771  | 849630  | 518379.4 | 2.257 | 7.5 | 0.7 | 7.2  | 1.1 | 0.4 | 0.84 | 0.78291 | 2170.1 | 15.4 | 2142.4 | 9.5  | 2116.0 | 12 | -2.6 |
| Spot 123 | 465603  | 459043  | 63392.1  | 1.492 | 5.4 | 0.6 | 13.1 | 1.0 | 0.5 | 0.82 | 0.82580 | 2704.2 | 18.2 | 2684.9 | 9.4  | 2670.3 | 9  | -1.3 |
| Spot 124 | 928153  | 915076  | 45581.1  | 3.279 | 7.5 | 0.8 | 7.3  | 1.4 | 0.4 | 1.15 | 0.83717 | 2156.7 | 21.1 | 2143.1 | 12.3 | 2130.0 | 13 | -1.3 |
| Spot 125 | 871412  | 859135  | 94448.3  | 1.935 | 8.3 | 0.8 | 5.9  | 1.2 | 0.4 | 0.87 | 0.71918 | 1964.4 | 14.8 | 1956.6 | 10.5 | 1948.3 | 15 | -0.8 |
| Spot 126 | 1912668 | 1885721 | 116381.9 | 2.116 | 8.5 | 0.7 | 5.4  | 1.1 | 0.3 | 0.90 | 0.80979 | 1886.5 | 14.8 | 1890.5 | 9.6  | 1894.9 | 12 | 0.4  |
| Spot 127 | 4119644 | 4061605 | 275078.9 | 0.897 | 7.4 | 0.5 | 7.2  | 0.9 | 0.4 | 0.74 | 0.85364 | 2118.7 | 13.4 | 2137.3 | 7.8  | 2155.3 | 8  | 1.7  |
| Spot 128 | 942912  | 929628  | 169089.9 | 2.683 | 7.5 | 0.6 | 7.2  | 1.1 | 0.4 | 0.94 | 0.82283 | 2133.6 | 17.1 | 2134.0 | 10.2 | 2134.3 | 11 | 0.0  |
| Spot 129 | 375624  | 370332  | 120626.4 | 1.510 | 4.6 | 0.7 | 17.3 | 1.1 | 0.6 | 0.85 | 0.75670 | 2943.2 | 20.0 | 2951.9 | 10.8 | 2957.9 | 12 | 0.5  |
| Spot 130 | 2017856 | 1989428 | 307765.0 | 2.122 | 5.3 | 0.7 | 13.2 | 1.2 | 0.5 | 0.99 | 0.81390 | 2668.8 | 21.6 | 2697.2 | 11.5 | 2718.5 | 12 | 1.8  |
| Spot 131 | 412256  | 406448  | 62326.0  | 1.598 | 7.3 | 0.7 | 7.5  | 1.1 | 0.4 | 0.82 | 0.75746 | 2168.6 | 15.2 | 2167.3 | 9.7  | 2166.0 | 12 | -0.1 |
| Spot 132 | 1510670 | 1489387 | 141941.5 | 1.245 | 7.5 | 0.6 | 7.2  | 1.1 | 0.4 | 0.86 | 0.80154 | 2146.2 | 15.7 | 2142.1 | 9.6  | 2138.1 | 11 | -0.4 |
| Spot 133 | 763080  | 752329  | 88513.4  | 2.352 | 7.5 | 0.7 | 7.2  | 1.5 | 0.4 | 1.29 | 0.87278 | 2135.1 | 23.5 | 2131.0 | 13.2 | 2127.1 | 13 | -0.4 |
| Spot 134 | 939422  | 926187  | 159890.9 | 3.608 | 7.2 | 0.6 | 7.8  | 1.1 | 0.4 | 0.94 | 0.85245 | 2222.0 | 17.7 | 2207.1 | 9.9  | 2193.2 | 10 | -1.3 |
| Spot 135 | 852058  | 840054  | 101898.1 | 1.837 | 7.5 | 0.7 | 7.4  | 1.2 | 0.4 | 0.95 | 0.82343 | 2187.3 | 17.7 | 2155.2 | 10.4 | 2124.7 | 12 | -2.9 |
| Spot 136 | 1288426 | 1270274 | 511166.9 | 1.730 | 7.0 | 0.5 | 8.0  | 0.8 | 0.4 | 0.65 | 0.78911 | 2218.6 | 12.1 | 2231.3 | 7.4  | 2243.0 | 9  | 1.1  |
| Spot 137 | 1575189 | 1552997 | 292606.0 | 1.853 | 7.1 | 0.6 | 7.8  | 1.2 | 0.4 | 1.02 | 0.85274 | 2198.5 | 19.0 | 2206.8 | 10.8 | 2214.4 | 11 | 0.7  |
| Spot 138 | 1694524 | 1670651 | 192772.4 | 1.499 | 7.6 | 0.6 | 6.9  | 1.0 | 0.4 | 0.83 | 0.81293 | 2070.5 | 14.6 | 2092.5 | 9.0  | 2114.2 | 10 | 2.1  |
| Spot 139 | 881274  | 868858  | 49321.8  | 1.107 | 7.6 | 0.6 | 7.0  | 1.1 | 0.4 | 0.95 | 0.83071 | 2119.7 | 17.2 | 2114.3 | 10.2 | 2109.0 | 11 | -0.5 |
| Spot 140 | 839393  | 827567  | #####    | 1.297 | 8.6 | 0.8 | 5.4  | 1.2 | 0.3 | 0.92 | 0.76703 | 1905.6 | 15.1 | 1890.5 | 10.2 | 1874.0 | 14 | -1.7 |
| Spot 141 | 681936  | 672329  | 61971.0  | 2.307 | 3.7 | 0.6 | 25.0 | 1.2 | 0.7 | 1.06 | 0.85359 | 3330.8 | 27.5 | 3307.5 | 12.1 | 3293.5 | 10 | -1.1 |
| Spot 142 | 3809388 | 3755720 | 414851.9 | 1.005 | 7.4 | 0.6 | 7.2  | 1.1 | 0.4 | 0.88 | 0.81265 | 2116.9 | 15.8 | 2136.4 | 9.6  | 2155.2 | 11 | 1.8  |
| Spot 143 | 1428975 | 1408843 | #####    | 4.039 | 7.6 | 0.6 | 7.1  | 1.1 | 0.4 | 0.94 | 0.83008 | 2131.1 | 17.1 | 2118.6 | 10.1 | 2106.5 | 11 | -1.2 |
| Spot 144 | 438682  | 432502  | 39402.4  | 1.888 | 7.6 | 0.9 | 7.2  | 1.4 | 0.4 | 1.08 | 0.76919 | 2167.0 | 19.9 | 2138.1 | 12.5 | 2110.5 | 16 | -2.7 |
| Spot 145 | 1683447 | 1659730 | 362577.4 | 2.172 | 5.5 | 0.6 | 12.7 | 1.0 | 0.5 | 0.73 | 0.75255 | 2648.8 | 15.9 | 2658.2 | 9.2  | 2665.4 | 11 | 0.6  |
| Spot 146 | 510920  | 503722  | 97526.3  | 2.316 | 8.5 | 0.7 | 5.5  | 1.2 | 0.3 | 0.95 | 0.78601 | 1903.3 | 15.6 | 1906.0 | 10.4 | 1909.0 | 13 | 0.3  |
| Spot 147 | 817159  | 805646  | 145570.0 | 1.719 | 7.0 | 0.7 | 8.1  | 1.4 | 0.4 | 1.20 | 0.85803 | 2243.4 | 22.7 | 2240.3 | 12.6 | 2237.4 | 12 | -0.3 |
| Spot 148 | 1596258 | 1573769 | 320139.7 | 2.217 | 5.3 | 0.7 | 13.1 | 1.0 | 0.5 | 0.79 | 0.75597 | 2670.3 | 17.3 | 2688.7 | 9.9  | 2702.5 | 11 | 1.2  |
| Spot 149 | 607607  | 599047  | 46265.7  | 1.749 | 7.5 | 0.7 | 7.2  | 1.3 | 0.4 | 1.10 | 0.83689 | 2163.3 | 20.3 | 2139.2 | 11.8 | 2116.1 | 13 | -2.2 |
| Spot 150 | 1915772 | 1888782 | 101685.7 | 1.255 | 4.9 | 0.6 | 15.4 | 1.1 | 0.6 | 0.91 | 0.82712 | 2828.0 | 20.8 | 2839.5 | 10.5 | 2847.7 | 10 | 0.7  |
| Spot 151 | 1572325 | 1550174 | 861158.9 | 1.769 | 7.2 | 0.5 | 7.7  | 0.9 | 0.4 | 0.70 | 0.80963 | 2195.7 | 13.0 | 2192.7 | 7.7  | 2189.8 | 9  | -0.3 |

|          |         |         |          |       |     |     |      |     |     |      |         |        |      |        |      |        |    |      |
|----------|---------|---------|----------|-------|-----|-----|------|-----|-----|------|---------|--------|------|--------|------|--------|----|------|
| Spot 152 | 1584599 | 1562275 | 115206.6 | 2.261 | 5.4 | 0.7 | 13.1 | 1.1 | 0.5 | 0.92 | 0.80532 | 2678.6 | 20.1 | 2688.0 | 10.8 | 2695.0 | 11 | 0.6  |
| Spot 153 | 764478  | 753708  | 118887.8 | 1.154 | 7.1 | 0.8 | 8.0  | 1.1 | 0.4 | 0.78 | 0.69944 | 2245.1 | 14.8 | 2228.5 | 10.0 | 2213.4 | 14 | -1.4 |
| Spot 154 | 575655  | 567545  | 46233.3  | 2.392 | 8.6 | 0.6 | 5.4  | 1.0 | 0.3 | 0.75 | 0.77732 | 1898.0 | 12.3 | 1888.7 | 8.2  | 1878.6 | 11 | -1.0 |
| Spot 155 | 1607973 | 1585319 | 437854.8 | 1.285 | 4.8 | 0.5 | 15.4 | 0.9 | 0.5 | 0.73 | 0.82304 | 2808.6 | 16.6 | 2841.5 | 8.4  | 2864.8 | 8  | 2.0  |
| Spot 156 | 895408  | 882793  | 30913.2  | 2.901 | 7.4 | 0.7 | 7.3  | 1.2 | 0.4 | 0.97 | 0.81813 | 2137.9 | 17.7 | 2142.7 | 10.6 | 2147.2 | 12 | 0.4  |
| Spot 157 | 578965  | 570808  | 34861.7  | 2.196 | 7.4 | 0.6 | 7.2  | 1.1 | 0.4 | 0.92 | 0.83741 | 2133.7 | 16.7 | 2141.9 | 9.8  | 2149.8 | 10 | 0.7  |
| Spot 158 | 1963524 | 1935861 | 90787.0  | 1.733 | 8.5 | 0.4 | 5.4  | 0.8 | 0.3 | 0.68 | 0.86267 | 1881.1 | 11.2 | 1890.5 | 6.8  | 1900.8 | 7  | 1.0  |
| Spot 159 | 1480649 | 1459789 | 90345.4  | 1.848 | 7.3 | 0.5 | 7.6  | 0.9 | 0.4 | 0.71 | 0.81959 | 2188.6 | 13.2 | 2182.0 | 7.8  | 2175.9 | 9  | -0.6 |
| Spot 160 | 4695797 | 4629640 | #####    | 2.023 | 7.3 | 0.6 | 7.4  | 1.3 | 0.4 | 1.12 | 0.88466 | 2149.7 | 20.5 | 2165.2 | 11.3 | 2180.0 | 10 | 1.4  |
| Spot 161 | 393867  | 388318  | 204190.6 | 1.934 | 7.3 | 0.6 | 7.3  | 1.2 | 0.4 | 1.00 | 0.85111 | 2128.6 | 18.1 | 2146.2 | 10.5 | 2163.1 | 11 | 1.6  |
| Spot 162 | 2103077 | 2073447 | 831601.5 | 1.743 | 8.5 | 0.6 | 5.5  | 0.9 | 0.3 | 0.69 | 0.75194 | 1884.4 | 11.3 | 1898.6 | 7.9  | 1914.2 | 11 | 1.6  |
| Spot 163 | 1836407 | 1810534 | 100285.3 | 2.361 | 5.4 | 0.6 | 13.0 | 1.0 | 0.5 | 0.78 | 0.78768 | 2660.5 | 16.9 | 2676.9 | 9.3  | 2689.3 | 10 | 1.1  |
| Spot 164 | 1512738 | 1491425 | 810341.2 | 2.063 | 5.4 | 0.6 | 13.0 | 0.9 | 0.5 | 0.75 | 0.80266 | 2668.1 | 16.5 | 2682.8 | 8.9  | 2693.9 | 9  | 1.0  |
| Spot 165 | 600441  | 591982  | #####    | 2.030 | 3.9 | 0.6 | 22.2 | 1.1 | 0.6 | 0.90 | 0.83649 | 3164.9 | 22.6 | 3190.7 | 10.5 | 3206.9 | 9  | 1.3  |
| Spot 166 | 1428307 | 1408185 | 213809.8 | 1.759 | 7.6 | 0.5 | 7.0  | 1.0 | 0.4 | 0.82 | 0.84263 | 2124.2 | 14.9 | 2111.9 | 8.7  | 2099.9 | 9  | -1.2 |
| Spot 167 | 402018  | 396354  | 58461.4  | 1.737 | 7.3 | 0.7 | 7.6  | 1.2 | 0.4 | 1.02 | 0.84151 | 2210.2 | 19.1 | 2186.9 | 10.9 | 2165.2 | 11 | -2.1 |
| Spot 168 | 916519  | 903606  | 65979.4  | 2.341 | 7.6 | 0.7 | 7.3  | 1.0 | 0.4 | 0.76 | 0.74815 | 2183.0 | 14.1 | 2146.7 | 9.1  | 2112.1 | 12 | -3.4 |
| Spot 169 | 672705  | 663228  | 78024.1  | 0.916 | 7.5 | 0.7 | 7.4  | 1.2 | 0.4 | 1.04 | 0.83879 | 2195.2 | 19.4 | 2165.2 | 11.1 | 2137.0 | 12 | -2.7 |
| Spot 170 | 1510776 | 1489492 | 181175.3 | 1.461 | 7.2 | 0.7 | 7.6  | 1.2 | 0.4 | 0.98 | 0.82956 | 2161.8 | 18.0 | 2179.8 | 10.6 | 2196.7 | 11 | 1.6  |
| Spot 171 | 578838  | 570683  | 64720.8  | 1.631 | 7.8 | 0.6 | 6.5  | 1.2 | 0.4 | 1.05 | 0.85063 | 2032.1 | 18.3 | 2044.1 | 10.9 | 2056.1 | 11 | 1.2  |
| Spot 172 | 2461814 | 2427130 | 428988.9 | 2.257 | 5.3 | 0.7 | 13.2 | 1.3 | 0.5 | 1.08 | 0.82816 | 2668.0 | 23.7 | 2691.7 | 12.4 | 2709.5 | 12 | 1.5  |
| Spot 173 | 454251  | 447852  | 185356.0 | 1.178 | 5.2 | 0.6 | 14.5 | 1.1 | 0.6 | 0.93 | 0.83956 | 2837.1 | 21.4 | 2786.1 | 10.5 | 2749.4 | 10 | -3.2 |
| Spot 174 | 1573337 | 1551171 | 468529.6 | 2.064 | 7.5 | 0.7 | 7.1  | 1.2 | 0.4 | 1.02 | 0.82576 | 2120.0 | 18.4 | 2124.5 | 11.0 | 2128.8 | 12 | 0.4  |
| Spot 175 | 1591463 | 1569041 | 185450.3 | 1.898 | 5.3 | 0.6 | 13.2 | 1.2 | 0.5 | 0.99 | 0.85178 | 2657.2 | 21.5 | 2695.7 | 10.9 | 2724.6 | 10 | 2.5  |
| Spot 176 | 1570889 | 1548757 | 113225.6 | 1.932 | 5.4 | 0.5 | 13.2 | 0.7 | 0.5 | 0.55 | 0.75441 | 2683.8 | 12.0 | 2690.6 | 6.8  | 2695.7 | 8  | 0.4  |
| Spot 177 | 1550715 | 1528867 | 111679.0 | 2.168 | 5.3 | 0.6 | 13.0 | 1.2 | 0.5 | 0.99 | 0.84108 | 2635.1 | 21.4 | 2680.9 | 11.1 | 2715.6 | 11 | 3.0  |
| Spot 178 | 674737  | 665231  | 120051.0 | 2.120 | 9.0 | 0.8 | 4.9  | 1.3 | 0.3 | 1.00 | 0.79576 | 1793.8 | 15.6 | 1796.5 | 10.5 | 1799.6 | 14 | 0.3  |
| Spot 179 | 1208728 | 1191699 | 623008.9 | 3.300 | 7.5 | 0.8 | 7.3  | 1.2 | 0.4 | 0.86 | 0.72243 | 2168.6 | 15.9 | 2153.7 | 10.7 | 2139.4 | 14 | -1.4 |
| Spot 180 | 2598657 | 2562046 | #####    | 3.358 | 4.8 | 0.7 | 15.8 | 1.3 | 0.6 | 1.12 | 0.85951 | 2838.9 | 25.6 | 2865.8 | 12.4 | 2884.7 | 11 | 1.6  |
| Spot 181 | 620578  | 611835  | 72798.9  | 2.276 | 7.6 | 0.8 | 7.1  | 1.3 | 0.4 | 1.10 | 0.82151 | 2130.4 | 20.0 | 2122.6 | 12.0 | 2115.1 | 13 | -0.7 |
| Spot 182 | 618941  | 610221  | 63800.3  | 0.837 | 6.1 | 0.6 | 10.5 | 1.0 | 0.5 | 0.81 | 0.78752 | 2499.0 | 16.8 | 2483.6 | 9.6  | 2471.1 | 11 | -1.1 |
| Spot 183 | 2426323 | 2392139 | #####    | 1.923 | 5.3 | 0.5 | 13.2 | 1.0 | 0.5 | 0.85 | 0.85411 | 2651.5 | 18.5 | 2690.5 | 9.4  | 2720.0 | 9  | 2.5  |
| Spot 184 | 1991685 | 1963625 | 204925.5 | 2.160 | 3.5 | 0.6 | 27.2 | 1.0 | 0.7 | 0.86 | 0.84061 | 3378.5 | 22.5 | 3389.9 | 10.0 | 3396.6 | 9  | 0.5  |
| Spot 185 | 1623389 | 1600518 | 492261.3 | 2.281 | 7.4 | 0.6 | 7.4  | 0.9 | 0.4 | 0.65 | 0.74894 | 2166.8 | 11.9 | 2155.6 | 7.7  | 2144.9 | 10 | -1.0 |
| Spot 186 | 452256  | 445884  | 118990.5 | 2.603 | 6.9 | 0.8 | 8.5  | 1.3 | 0.4 | 1.05 | 0.78270 | 2296.3 | 20.2 | 2285.7 | 12.2 | 2276.3 | 14 | -0.9 |
| Spot 187 | 942513  | 929234  | 106328.6 | 1.386 | 7.2 | 0.5 | 7.8  | 1.1 | 0.4 | 0.91 | 0.85661 | 2209.1 | 17.0 | 2209.0 | 9.6  | 2208.8 | 10 | 0.0  |
| Spot 188 | 3898342 | 3843420 | 516765.3 | 1.465 | 7.4 | 0.6 | 7.0  | 1.0 | 0.4 | 0.79 | 0.77883 | 2075.1 | 14.0 | 2112.7 | 9.0  | 2149.4 | 11 | 3.5  |
| Spot 189 | 284346  | 280340  | 186429.9 | 0.771 | 6.1 | 0.8 | 10.8 | 1.2 | 0.5 | 0.97 | 0.77920 | 2535.5 | 20.4 | 2505.7 | 11.6 | 2481.6 | 13 | -2.2 |
| Spot 190 | 1151228 | 1135009 | 284176.8 | 2.568 | 5.4 | 0.7 | 13.1 | 1.1 | 0.5 | 0.90 | 0.80234 | 2705.5 | 19.8 | 2690.4 | 10.6 | 2679.1 | 11 | -1.0 |
| Spot 191 | 972691  | 958987  | 125112.5 | 2.337 | 5.5 | 0.6 | 12.6 | 0.9 | 0.5 | 0.73 | 0.77391 | 2648.3 | 15.8 | 2653.5 | 8.8  | 2657.5 | 10 | 0.3  |
| Spot 192 | 1247880 | 1230299 | 170937.4 | 1.069 | 7.5 | 0.7 | 6.9  | 1.1 | 0.4 | 0.86 | 0.79618 | 2051.4 | 15.2 | 2093.3 | 9.6  | 2134.7 | 11 | 3.9  |
| Spot 193 | 420756  | 414828  | 67263.7  | 0.814 | 7.6 | 0.8 | 7.1  | 1.2 | 0.4 | 0.83 | 0.70318 | 2156.5 | 15.2 | 2130.0 | 10.5 | 2104.6 | 15 | -2.5 |
| Spot 194 | 1304240 | 1285865 | 711886.8 | 2.182 | 5.7 | 0.5 | 11.9 | 1.0 | 0.5 | 0.84 | 0.84018 | 2579.0 | 17.9 | 2598.7 | 9.4  | 2614.1 | 9  | 1.3  |

|          |         |         |          |       |     |     |      |     |     |      |         |        |      |        |      |        |    |      |
|----------|---------|---------|----------|-------|-----|-----|------|-----|-----|------|---------|--------|------|--------|------|--------|----|------|
| Spot 195 | 1209383 | 1192344 | 110456.0 | 1.421 | 7.6 | 0.7 | 6.9  | 1.1 | 0.4 | 0.85 | 0.78238 | 2090.3 | 15.1 | 2095.8 | 9.6  | 2101.1 | 12 | 0.5  |
| Spot 196 | 510825  | 503629  | 23343.8  | 1.335 | 7.0 | 0.9 | 7.7  | 1.3 | 0.4 | 0.91 | 0.70893 | 2151.8 | 16.7 | 2196.1 | 11.6 | 2237.7 | 16 | 3.8  |
| Spot 197 | 1586617 | 1564264 | 88072.5  | 1.763 | 8.5 | 0.8 | 5.5  | 1.2 | 0.3 | 0.87 | 0.74474 | 1894.7 | 14.3 | 1900.7 | 10.1 | 1907.2 | 14 | 0.7  |
| Spot 198 | 926711  | 913655  | 114047.2 | 1.316 | 7.3 | 0.7 | 7.8  | 1.2 | 0.4 | 0.98 | 0.80519 | 2241.3 | 18.6 | 2212.0 | 11.0 | 2185.0 | 13 | -2.6 |
| Spot 199 | 1692567 | 1668721 | 354241.3 | 1.400 | 7.5 | 0.5 | 7.0  | 1.1 | 0.4 | 0.97 | 0.87127 | 2106.5 | 17.5 | 2116.3 | 9.9  | 2125.8 | 10 | 0.9  |
| Spot 200 | 1180402 | 1163772 | 111442.2 | 1.546 | 7.5 | 0.7 | 7.2  | 1.2 | 0.4 | 0.98 | 0.82127 | 2138.2 | 17.9 | 2137.5 | 10.7 | 2136.8 | 12 | -0.1 |
| Spot 201 | 1127199 | 1111318 | 94888.5  | 1.686 | 7.5 | 0.6 | 7.1  | 1.2 | 0.4 | 0.99 | 0.85781 | 2122.8 | 18.0 | 2123.3 | 10.3 | 2123.8 | 10 | 0.0  |
| Spot 202 | 904042  | 891306  | 110292.3 | 1.549 | 5.4 | 0.7 | 13.0 | 1.3 | 0.5 | 1.08 | 0.83656 | 2670.8 | 23.7 | 2679.9 | 12.2 | 2686.8 | 12 | 0.6  |
| Spot 203 | 401245  | 395592  | 295710.3 | 3.568 | 7.4 | 0.8 | 7.4  | 1.3 | 0.4 | 1.09 | 0.81978 | 2167.4 | 20.0 | 2165.6 | 11.9 | 2163.9 | 13 | -0.2 |
| Spot 204 | 1556527 | 1534598 | #####    | 1.073 | 7.5 | 0.5 | 7.2  | 0.8 | 0.4 | 0.66 | 0.79018 | 2142.4 | 12.0 | 2137.6 | 7.4  | 2133.0 | 9  | -0.4 |
| Spot 205 | 467089  | 460508  | 175100.3 | 1.978 | 5.3 | 0.7 | 13.3 | 1.1 | 0.5 | 0.86 | 0.78911 | 2681.4 | 19.0 | 2701.8 | 10.4 | 2717.1 | 11 | 1.3  |
| Spot 206 | 1356588 | 1337475 | 340493.1 | 2.228 | 5.4 | 0.7 | 13.1 | 1.2 | 0.5 | 0.94 | 0.79534 | 2662.2 | 20.5 | 2686.1 | 11.1 | 2704.1 | 12 | 1.6  |
| Spot 207 | 962051  | 948497  | 106228.7 | 4.460 | 7.0 | 0.7 | 8.2  | 1.3 | 0.4 | 1.04 | 0.82918 | 2246.9 | 19.7 | 2252.0 | 11.3 | 2256.5 | 12 | 0.4  |
| Spot 208 | 758679  | 747990  | 86954.9  | 1.491 | 7.7 | 0.7 | 6.8  | 1.3 | 0.4 | 1.09 | 0.84270 | 2087.9 | 19.4 | 2086.3 | 11.4 | 2084.7 | 12 | -0.2 |
| Spot 209 | 1043404 | 1028704 | 371035.5 | 1.683 | 7.5 | 0.7 | 7.3  | 1.2 | 0.4 | 1.00 | 0.80121 | 2155.6 | 18.3 | 2148.9 | 11.1 | 2142.5 | 13 | -0.6 |
| Spot 210 | 1435802 | 1415574 | 858257.9 | 1.720 | 8.6 | 0.6 | 5.5  | 1.0 | 0.3 | 0.84 | 0.83442 | 1897.4 | 13.8 | 1896.1 | 8.6  | 1894.6 | 10 | -0.1 |
| Spot 211 | 1848920 | 1822871 | #####    | 1.918 | 5.4 | 0.5 | 13.1 | 0.8 | 0.5 | 0.65 | 0.77013 | 2670.5 | 14.2 | 2689.0 | 7.9  | 2702.9 | 9  | 1.2  |
| Spot 212 | 1220128 | 1202938 | 188032.7 | 2.605 | 5.3 | 0.5 | 13.0 | 1.0 | 0.5 | 0.83 | 0.83567 | 2645.3 | 18.1 | 2680.1 | 9.4  | 2706.4 | 9  | 2.3  |
| Spot 213 | 2134686 | 2104611 | 135284.3 | 0.643 | 7.4 | 0.5 | 7.3  | 0.8 | 0.4 | 0.61 | 0.78127 | 2147.7 | 11.2 | 2151.9 | 7.0  | 2155.8 | 9  | 0.4  |
| Spot 214 | 1280817 | 1262772 | 510550.4 | 1.407 | 8.6 | 0.5 | 5.5  | 1.0 | 0.3 | 0.86 | 0.86655 | 1906.9 | 14.2 | 1893.8 | 8.5  | 1879.4 | 9  | -1.5 |
| Spot 215 | 873031  | 860731  | 113760.4 | 3.268 | 7.4 | 0.6 | 7.5  | 1.0 | 0.4 | 0.79 | 0.80250 | 2186.1 | 14.7 | 2174.0 | 8.9  | 2162.7 | 10 | -1.1 |
| Spot 216 | 779882  | 768894  | 80555.1  | 2.177 | 7.5 | 0.8 | 7.1  | 1.4 | 0.4 | 1.07 | 0.78876 | 2118.4 | 19.2 | 2121.4 | 12.0 | 2124.4 | 15 | 0.3  |
| Spot 217 | 465353  | 458797  | 68600.0  | 1.928 | 7.3 | 0.7 | 7.5  | 1.1 | 0.4 | 0.92 | 0.81358 | 2162.1 | 16.8 | 2170.9 | 10.1 | 2179.3 | 11 | 0.8  |
| Spot 218 | 663502  | 654154  | 116469.3 | 2.459 | 6.9 | 0.8 | 8.2  | 1.4 | 0.4 | 1.17 | 0.82755 | 2228.1 | 22.1 | 2254.8 | 12.9 | 2279.1 | 14 | 2.2  |
| Spot 219 | 748034  | 737495  | 94454.2  | 0.910 | 5.3 | 0.7 | 13.7 | 1.3 | 0.5 | 1.11 | 0.85080 | 2744.2 | 24.9 | 2731.1 | 12.4 | 2721.4 | 11 | -0.8 |
| Spot 220 | 1229669 | 1212345 | 969906.9 | 2.278 | 7.6 | 0.6 | 7.0  | 1.5 | 0.4 | 1.34 | 0.90388 | 2125.2 | 24.3 | 2114.9 | 13.2 | 2105.0 | 11 | -1.0 |
| Spot 221 | 687010  | 677331  | 99212.3  | 0.934 | 8.0 | 0.6 | 6.5  | 1.1 | 0.4 | 0.91 | 0.82742 | 2077.6 | 16.1 | 2052.3 | 9.7  | 2027.0 | 11 | -2.5 |
| Spot 222 | 955243  | 941785  | 91417.0  | 2.144 | 7.3 | 0.6 | 7.9  | 1.1 | 0.4 | 0.88 | 0.81797 | 2254.6 | 16.7 | 2220.6 | 9.7  | 2189.4 | 11 | -3.0 |
| Spot 223 | 1537964 | 1516296 | #####    | 1.260 | 4.7 | 0.5 | 16.6 | 1.0 | 0.6 | 0.90 | 0.86687 | 2908.5 | 21.1 | 2914.6 | 10.0 | 2918.8 | 8  | 0.4  |
| Spot 224 | 981713  | 967882  | 55003.9  | 2.279 | 7.6 | 0.8 | 7.0  | 1.5 | 0.4 | 1.26 | 0.83601 | 2106.9 | 22.7 | 2106.1 | 13.4 | 2105.3 | 15 | -0.1 |
| Spot 225 | 2636275 | 2599133 | 231829.7 | 1.357 | 7.2 | 0.6 | 7.6  | 1.2 | 0.4 | 0.96 | 0.83091 | 2170.7 | 17.6 | 2185.6 | 10.3 | 2199.6 | 11 | 1.3  |
| Spot 226 | 679041  | 669474  | 65915.7  | 2.479 | 7.5 | 0.7 | 7.3  | 1.1 | 0.4 | 0.88 | 0.77060 | 2149.8 | 16.1 | 2145.1 | 10.2 | 2140.6 | 13 | -0.4 |
| Spot 227 | 1157684 | 1141374 | 95521.6  | 2.064 | 8.6 | 0.8 | 5.4  | 1.3 | 0.3 | 1.04 | 0.78765 | 1882.4 | 16.9 | 1888.0 | 11.3 | 1894.2 | 15 | 0.6  |
| Spot 228 | 610664  | 602060  | #####    | 1.833 | 8.1 | 0.7 | 6.2  | 1.2 | 0.4 | 0.99 | 0.80614 | 2001.2 | 17.0 | 2001.1 | 10.7 | 2001.0 | 13 | 0.0  |
| Spot 229 | 1175319 | 1158760 | 102465.1 | 1.554 | 8.6 | 0.7 | 5.4  | 1.3 | 0.3 | 1.06 | 0.84174 | 1902.0 | 17.5 | 1891.9 | 10.8 | 1880.7 | 12 | -1.1 |
| Spot 230 | 1609098 | 1586428 | 445388.4 | 1.880 | 8.6 | 0.7 | 5.4  | 1.1 | 0.3 | 0.90 | 0.81058 | 1878.1 | 14.7 | 1889.0 | 9.5  | 1900.9 | 12 | 1.2  |
| Spot 231 | 984347  | 970479  | #####    | 2.160 | 7.4 | 0.7 | 7.4  | 1.2 | 0.4 | 0.94 | 0.79538 | 2153.8 | 17.2 | 2156.7 | 10.6 | 2159.3 | 12 | 0.3  |
| Spot 232 | 1398452 | 1378750 | 87589.0  | 1.699 | 7.5 | 0.6 | 7.2  | 1.1 | 0.4 | 0.95 | 0.84704 | 2120.2 | 17.1 | 2132.1 | 10.0 | 2143.6 | 10 | 1.1  |
| Spot 233 | 2878751 | 2838193 | 205865.9 | 1.577 | 7.5 | 0.7 | 7.0  | 1.2 | 0.4 | 0.99 | 0.83005 | 2096.3 | 17.8 | 2117.6 | 10.7 | 2138.4 | 12 | 2.0  |
| Spot 234 | 1405126 | 1385330 | 105047.9 | 1.701 | 6.1 | 0.7 | 10.3 | 1.3 | 0.5 | 1.08 | 0.83117 | 2440.8 | 22.0 | 2463.5 | 12.1 | 2482.3 | 12 | 1.7  |
| Spot 235 | 1066865 | 1051835 | 73713.1  | 1.773 | 7.6 | 0.8 | 7.0  | 1.2 | 0.4 | 0.91 | 0.75047 | 2112.7 | 16.5 | 2109.0 | 10.8 | 2105.3 | 14 | -0.3 |
| Spot 236 | 383421  | 378019  | 90688.7  | 1.759 | 7.7 | 0.6 | 6.8  | 1.2 | 0.4 | 0.98 | 0.83291 | 2076.9 | 17.3 | 2086.9 | 10.4 | 2096.8 | 11 | 0.9  |
| Spot 237 | 1187465 | 1170735 | 143428.0 | 2.663 | 5.3 | 0.7 | 13.1 | 1.0 | 0.5 | 0.77 | 0.74618 | 2646.3 | 16.7 | 2684.3 | 9.7  | 2713.0 | 11 | 2.5  |

|          |         |         |          |       |     |     |      |     |     |      |         |        |      |        |      |        |    |      |
|----------|---------|---------|----------|-------|-----|-----|------|-----|-----|------|---------|--------|------|--------|------|--------|----|------|
| Spot 238 | 2890591 | 2849867 | 262137.7 | 3.019 | 7.6 | 0.7 | 7.0  | 1.4 | 0.4 | 1.14 | 0.83789 | 2114.2 | 20.6 | 2115.1 | 12.1 | 2115.8 | 13 | 0.1  |
| Spot 239 | 370341  | 365123  | 36261.1  | 2.230 | 6.3 | 0.8 | 9.9  | 1.3 | 0.5 | 0.96 | 0.76015 | 2420.6 | 19.4 | 2421.1 | 11.7 | 2421.5 | 14 | 0.0  |
| Spot 240 | 1406172 | 1386361 | 130296.6 | 1.770 | 7.3 | 0.8 | 7.5  | 1.2 | 0.4 | 0.94 | 0.76045 | 2155.0 | 17.2 | 2167.6 | 11.1 | 2179.6 | 14 | 1.1  |
| Spot 241 | 769307  | 758469  | #####    | 1.035 | 8.0 | 0.8 | 6.4  | 1.5 | 0.4 | 1.19 | 0.81712 | 2039.1 | 20.7 | 2032.8 | 12.7 | 2026.4 | 15 | -0.6 |
| Spot 242 | 1755057 | 1730331 | 171115.8 | 1.980 | 7.7 | 0.6 | 6.9  | 1.3 | 0.4 | 1.08 | 0.85793 | 2089.3 | 19.3 | 2092.5 | 11.2 | 2095.7 | 11 | 0.3  |
| Spot 243 | 1135730 | 1119729 | 267671.0 | 2.653 | 5.3 | 0.6 | 13.7 | 0.9 | 0.5 | 0.73 | 0.77854 | 2739.2 | 16.4 | 2730.1 | 8.9  | 2723.3 | 10 | -0.6 |
| Spot 244 | 486582  | 479727  | 49972.3  | 1.790 | 6.0 | 0.6 | 10.8 | 0.8 | 0.5 | 0.62 | 0.74118 | 2509.5 | 13.0 | 2507.3 | 7.8  | 2505.6 | 9  | -0.2 |
| Spot 245 | 1043421 | 1028721 | 207404.2 | 1.482 | 7.6 | 0.6 | 7.0  | 0.9 | 0.4 | 0.76 | 0.80024 | 2105.5 | 13.6 | 2110.3 | 8.4  | 2114.8 | 10 | 0.4  |
| Spot 246 | 1777381 | 1752340 | 164267.0 | 0.937 | 7.6 | 0.5 | 7.1  | 0.9 | 0.4 | 0.66 | 0.77461 | 2131.0 | 12.0 | 2124.0 | 7.6  | 2117.2 | 9  | -0.7 |
| Spot 247 | 985279  | 971398  | #####    | 1.824 | 5.4 | 0.6 | 12.8 | 1.1 | 0.5 | 0.87 | 0.80773 | 2634.5 | 18.8 | 2663.0 | 10.1 | 2684.6 | 10 | 1.9  |
| Spot 248 | 733261  | 722931  | 68312.0  | 1.107 | 7.5 | 0.7 | 7.2  | 1.3 | 0.4 | 1.01 | 0.80423 | 2140.0 | 18.4 | 2136.0 | 11.2 | 2132.1 | 13 | -0.4 |
| Spot 249 | 277561  | 273651  | 72512.9  | 2.364 | 7.2 | 0.8 | 7.9  | 1.3 | 0.4 | 1.05 | 0.79705 | 2225.1 | 19.7 | 2215.0 | 11.8 | 2205.6 | 14 | -0.9 |
| Spot 250 | 439324  | 433135  | 172061.7 | 1.853 | 7.3 | 0.7 | 7.5  | 1.2 | 0.4 | 0.91 | 0.77987 | 2158.5 | 16.7 | 2173.4 | 10.5 | 2187.6 | 13 | 1.3  |
| Spot 251 | 571431  | 563380  | 107659.3 | 1.781 | 6.7 | 0.7 | 9.0  | 1.2 | 0.4 | 1.00 | 0.83103 | 2340.6 | 19.6 | 2341.5 | 11.0 | 2342.2 | 11 | 0.1  |
| Spot 252 | 352870  | 347898  | 24537.8  | 2.163 | 7.2 | 0.6 | 8.0  | 1.1 | 0.4 | 0.91 | 0.82413 | 2260.2 | 17.4 | 2227.8 | 10.0 | 2198.1 | 11 | -2.8 |
| Spot 253 | 716567  | 706472  | 91106.6  | 2.138 | 7.8 | 0.8 | 6.8  | 1.2 | 0.4 | 0.91 | 0.73479 | 2087.5 | 16.2 | 2080.4 | 11.0 | 2073.2 | 15 | -0.7 |
| Spot 254 | 1707063 | 1683013 | 133585.5 | 2.062 | 5.4 | 0.5 | 13.0 | 0.8 | 0.5 | 0.63 | 0.81148 | 2638.0 | 13.6 | 2676.2 | 7.3  | 2705.2 | 7  | 2.5  |
| Spot 255 | 1379444 | 1360010 | 74407.8  | 2.527 | 7.3 | 0.8 | 7.3  | 1.3 | 0.4 | 1.04 | 0.78177 | 2105.8 | 18.7 | 2143.0 | 11.9 | 2178.9 | 14 | 3.4  |
| Spot 256 | 957585  | 944094  | 90704.7  | 3.220 | 5.0 | 0.6 | 14.8 | 1.0 | 0.5 | 0.80 | 0.81530 | 2802.5 | 18.1 | 2805.6 | 9.3  | 2807.8 | 9  | 0.2  |
| Spot 257 | 1105947 | 1090366 | 89781.7  | 2.454 | 7.3 | 0.7 | 7.4  | 1.1 | 0.4 | 0.93 | 0.80778 | 2158.3 | 17.0 | 2165.1 | 10.3 | 2171.5 | 12 | 0.6  |
| Spot 258 | 2000235 | 1972054 | 338965.5 | 2.957 | 5.4 | 0.7 | 13.3 | 1.1 | 0.5 | 0.89 | 0.79981 | 2697.6 | 19.5 | 2699.2 | 10.5 | 2700.4 | 11 | 0.1  |
| Spot 259 | 557467  | 549613  | #####    | 2.311 | 5.8 | 0.7 | 11.3 | 1.1 | 0.5 | 0.88 | 0.76931 | 2529.2 | 18.4 | 2549.0 | 10.6 | 2564.8 | 12 | 1.4  |
| Spot 260 | 1207578 | 1190565 | 221939.3 | 1.254 | 5.4 | 0.6 | 12.7 | 1.1 | 0.5 | 0.93 | 0.82096 | 2609.3 | 20.0 | 2659.7 | 10.7 | 2698.3 | 11 | 3.3  |
| Spot 261 | 971145  | 957463  | 142016.9 | 3.557 | 8.1 | 0.6 | 6.3  | 1.1 | 0.4 | 0.92 | 0.82906 | 2031.1 | 16.0 | 2012.2 | 9.7  | 1992.8 | 11 | -1.9 |
| Spot 263 | 720292  | 710144  | 41248.2  | 1.901 | 7.4 | 0.9 | 7.5  | 1.5 | 0.4 | 1.25 | 0.81746 | 2169.3 | 23.0 | 2167.2 | 13.7 | 2165.2 | 15 | -0.2 |
| Spot 265 | 1169715 | 1153235 | 574318.1 | 2.384 | 5.5 | 0.6 | 12.7 | 1.2 | 0.5 | 1.06 | 0.86939 | 2644.0 | 23.0 | 2655.6 | 11.5 | 2664.5 | 10 | 0.8  |
| Spot 266 | 2039268 | 2010538 | 543114.9 | 1.652 | 7.6 | 0.5 | 7.1  | 1.3 | 0.4 | 1.21 | 0.91064 | 2126.9 | 21.9 | 2120.4 | 11.8 | 2114.1 | 10 | -0.6 |
| Spot 267 | 1627258 | 1604332 | 94455.2  | 2.270 | 5.4 | 0.6 | 13.1 | 1.0 | 0.5 | 0.78 | 0.81435 | 2667.7 | 17.0 | 2689.5 | 9.0  | 2705.9 | 9  | 1.4  |
| Spot 268 | 614026  | 605376  | 131699.8 | 3.022 | 7.4 | 0.8 | 7.4  | 1.2 | 0.4 | 0.91 | 0.76504 | 2169.1 | 16.7 | 2164.7 | 10.6 | 2160.5 | 13 | -0.4 |
| Spot 269 | 891833  | 879268  | 61016.2  | 0.988 | 7.4 | 0.6 | 7.2  | 1.0 | 0.4 | 0.77 | 0.78814 | 2121.8 | 14.0 | 2139.7 | 8.8  | 2156.9 | 11 | 1.6  |
| Spot 270 | 1890817 | 1864178 | 187253.2 | 2.814 | 7.6 | 0.5 | 7.0  | 0.9 | 0.4 | 0.71 | 0.83061 | 2108.9 | 12.7 | 2107.0 | 7.6  | 2105.1 | 8  | -0.2 |
| Spot 271 | 531276  | 523791  | #####    | 1.933 | 3.8 | 0.8 | 23.8 | 1.3 | 0.7 | 1.09 | 0.81323 | 3248.9 | 27.8 | 3260.5 | 13.0 | 3267.6 | 12 | 0.6  |
| Spot 272 | 744228  | 733743  | 162852.0 | 1.648 | 7.4 | 0.7 | 7.4  | 1.5 | 0.4 | 1.28 | 0.87333 | 2158.0 | 23.5 | 2158.3 | 13.1 | 2158.6 | 12 | 0.0  |
| Spot 273 | 1292679 | 1274467 | 371751.3 | 2.024 | 8.6 | 0.7 | 5.4  | 1.0 | 0.3 | 0.78 | 0.75364 | 1889.6 | 12.8 | 1892.1 | 8.9  | 1894.8 | 12 | 0.3  |
| Spot 274 | 1239851 | 1222383 | 158219.8 | 1.868 | 7.6 | 0.6 | 7.1  | 1.0 | 0.4 | 0.85 | 0.82028 | 2148.8 | 15.6 | 2130.1 | 9.3  | 2112.0 | 10 | -1.7 |
| Spot 275 | 469768  | 463150  | 38505.2  | 3.709 | 7.5 | 0.7 | 7.3  | 1.1 | 0.4 | 0.84 | 0.75147 | 2180.4 | 15.5 | 2154.5 | 10.0 | 2130.0 | 13 | -2.4 |
| Spot 276 | 659347  | 650058  | 56386.6  | 2.053 | 7.2 | 0.8 | 7.7  | 1.1 | 0.4 | 0.81 | 0.72752 | 2195.9 | 15.0 | 2199.4 | 10.0 | 2202.6 | 13 | 0.3  |
| Spot 277 | 1036129 | 1021531 | 263783.9 | 2.041 | 7.4 | 0.6 | 7.2  | 1.0 | 0.4 | 0.82 | 0.80624 | 2129.9 | 14.8 | 2140.2 | 9.0  | 2150.0 | 10 | 0.9  |
| Spot 278 | 1169268 | 1152794 | 448434.3 | 1.263 | 7.2 | 0.6 | 7.8  | 1.0 | 0.4 | 0.83 | 0.80315 | 2224.8 | 15.6 | 2213.6 | 9.3  | 2203.3 | 11 | -1.0 |
| Spot 279 | 457081  | 450641  | 92999.8  | 1.837 | 5.7 | 0.7 | 12.0 | 1.1 | 0.5 | 0.86 | 0.77559 | 2607.6 | 18.4 | 2608.2 | 10.4 | 2608.7 | 12 | 0.0  |
| Spot 280 | 2144586 | 2114372 | 244035.1 | 1.781 | 8.5 | 0.6 | 5.6  | 1.0 | 0.3 | 0.79 | 0.81697 | 1899.6 | 13.0 | 1910.4 | 8.3  | 1922.0 | 10 | 1.2  |
| Spot 281 | 943334  | 930043  | 99019.1  | 1.342 | 8.6 | 0.7 | 5.6  | 1.1 | 0.3 | 0.83 | 0.76713 | 1933.8 | 13.9 | 1915.8 | 9.3  | 1896.4 | 12 | -2.0 |
| Spot 282 | 482591  | 475792  | 46130.4  | 1.070 | 8.5 | 0.7 | 5.4  | 1.2 | 0.3 | 0.93 | 0.78738 | 1850.8 | 15.0 | 1877.4 | 10.1 | 1906.8 | 13 | 2.9  |

|          |         |         |          |       |     |     |      |     |     |      |         |        |      |        |      |        |    |      |
|----------|---------|---------|----------|-------|-----|-----|------|-----|-----|------|---------|--------|------|--------|------|--------|----|------|
| Spot 283 | 1244942 | 1227403 | 313296.3 | 0.983 | 7.6 | 0.7 | 6.9  | 1.1 | 0.4 | 0.80 | 0.75654 | 2088.7 | 14.3 | 2102.4 | 9.4  | 2115.8 | 12 | 1.3  |
| Spot 284 | 1839379 | 1813465 | 105647.1 | 2.133 | 8.4 | 0.6 | 5.7  | 1.1 | 0.3 | 0.94 | 0.85805 | 1931.9 | 15.7 | 1936.7 | 9.5  | 1941.9 | 10 | 0.5  |
| Spot 285 | 470352  | 463725  | 102668.9 | 1.636 | 5.6 | 0.8 | 12.4 | 1.3 | 0.5 | 0.97 | 0.77486 | 2634.7 | 21.0 | 2632.9 | 11.8 | 2631.4 | 13 | -0.1 |
| Spot 286 | 1062638 | 1047667 | 181958.9 | 3.212 | 7.4 | 0.7 | 7.3  | 1.0 | 0.4 | 0.73 | 0.70469 | 2133.7 | 13.3 | 2147.8 | 9.3  | 2161.2 | 13 | 1.3  |
| Spot 287 | 1057476 | 1042577 | 105049.9 | 1.943 | 5.5 | 0.5 | 13.1 | 0.9 | 0.5 | 0.75 | 0.82172 | 2694.8 | 16.5 | 2685.7 | 8.6  | 2678.8 | 9  | -0.6 |
| Spot 288 | 783055  | 772023  | 149831.5 | 2.186 | 7.6 | 0.8 | 7.1  | 1.1 | 0.4 | 0.79 | 0.70419 | 2132.8 | 14.3 | 2118.5 | 9.9  | 2104.6 | 14 | -1.3 |
| Spot 289 | 646531  | 637423  | 250559.4 | 0.710 | 5.4 | 0.6 | 13.2 | 1.1 | 0.5 | 0.90 | 0.83993 | 2696.4 | 19.8 | 2696.8 | 10.1 | 2697.1 | 10 | 0.0  |
| Spot 290 | 530652  | 523176  | 215083.0 | 1.342 | 8.2 | 0.8 | 6.0  | 1.1 | 0.4 | 0.79 | 0.71620 | 1968.3 | 13.3 | 1972.0 | 9.5  | 1975.9 | 14 | 0.4  |
| Spot 291 | 2022786 | 1994288 | 453498.3 | 1.983 | 5.4 | 0.7 | 12.9 | 1.3 | 0.5 | 1.12 | 0.85597 | 2629.8 | 24.2 | 2668.9 | 12.4 | 2698.6 | 11 | 2.5  |
| Spot 292 | 533795  | 526275  | 52939.1  | 2.672 | 7.6 | 0.6 | 6.8  | 1.3 | 0.4 | 1.10 | 0.86915 | 2061.4 | 19.4 | 2085.5 | 11.2 | 2109.5 | 11 | 2.3  |
| Spot 293 | 971198  | 957515  | 135711.3 | 2.587 | 8.6 | 0.6 | 5.7  | 1.2 | 0.4 | 0.96 | 0.82967 | 1961.4 | 16.2 | 1931.5 | 10.0 | 1899.7 | 12 | -3.2 |
| Spot 294 | 923271  | 910263  | 89078.4  | 1.618 | 7.3 | 0.7 | 7.8  | 1.1 | 0.4 | 0.87 | 0.78296 | 2225.1 | 16.4 | 2202.7 | 10.0 | 2182.0 | 12 | -2.0 |
| Spot 295 | 1780362 | 1755279 | 335368.4 | 2.260 | 5.8 | 0.5 | 11.5 | 0.9 | 0.5 | 0.79 | 0.84588 | 2541.2 | 16.5 | 2566.5 | 8.7  | 2586.5 | 8  | 1.8  |
| Spot 296 | 1427154 | 1407048 | 194629.8 | 2.590 | 5.4 | 0.6 | 13.3 | 1.1 | 0.5 | 0.95 | 0.85115 | 2687.7 | 20.9 | 2698.6 | 10.5 | 2706.8 | 10 | 0.7  |
| Spot 297 | 3069743 | 3026495 | 469133.8 | 2.060 | 7.4 | 0.5 | 7.1  | 1.2 | 0.4 | 1.05 | 0.88619 | 2103.7 | 18.9 | 2129.0 | 10.6 | 2153.5 | 10 | 2.3  |
| Spot 298 | 570855  | 562813  | 79162.1  | 0.838 | 5.3 | 0.7 | 13.2 | 1.2 | 0.5 | 0.94 | 0.81141 | 2665.6 | 20.5 | 2692.7 | 10.9 | 2713.1 | 11 | 1.7  |
| Spot 299 | 2145285 | 2115061 | 641937.5 | 2.069 | 8.5 | 0.6 | 5.5  | 1.0 | 0.3 | 0.83 | 0.82120 | 1895.2 | 13.6 | 1900.9 | 8.6  | 1907.1 | 10 | 0.6  |
| Spot 300 | 1552907 | 1531029 | 128779.6 | 1.918 | 8.5 | 0.5 | 5.5  | 0.9 | 0.3 | 0.71 | 0.83031 | 1882.6 | 11.6 | 1893.3 | 7.3  | 1905.0 | 9  | 1.2  |
| Spot 301 | 1134403 | 1118421 | 102225.5 | 2.092 | 7.6 | 0.6 | 7.1  | 1.1 | 0.4 | 0.89 | 0.83079 | 2124.4 | 16.2 | 2118.5 | 9.6  | 2112.7 | 11 | -0.6 |
| Spot 302 | 791000  | 779856  | 104727.7 | 2.284 | 5.4 | 0.8 | 13.4 | 1.3 | 0.5 | 0.98 | 0.76927 | 2722.8 | 21.9 | 2707.2 | 12.1 | 2695.5 | 14 | -1.0 |
| Spot 303 | 1492252 | 1471229 | #####    | 1.167 | 7.8 | 0.6 | 6.5  | 1.2 | 0.4 | 1.05 | 0.87002 | 2033.4 | 18.4 | 2047.7 | 10.7 | 2062.0 | 11 | 1.4  |
| Spot 304 | 611215  | 602604  | 42072.4  | 1.854 | 7.3 | 0.7 | 7.7  | 1.1 | 0.4 | 0.89 | 0.78914 | 2219.2 | 16.7 | 2202.1 | 10.2 | 2186.2 | 12 | -1.5 |
| Spot 305 | 832130  | 820407  | 69387.9  | 0.740 | 5.7 | 0.5 | 11.7 | 0.9 | 0.5 | 0.68 | 0.79983 | 2559.4 | 14.4 | 2581.9 | 8.0  | 2599.6 | 9  | 1.5  |
| Spot 306 | 117199  | 115548  | 20336.9  | 0.999 | 6.1 | 0.9 | 10.6 | 1.3 | 0.5 | 1.02 | 0.75461 | 2500.3 | 21.1 | 2491.5 | 12.5 | 2484.2 | 15 | -0.6 |
| Spot 307 | 1520700 | 1499276 | 139192.3 | 1.570 | 7.2 | 0.6 | 7.7  | 1.2 | 0.4 | 1.03 | 0.85835 | 2188.7 | 19.1 | 2196.1 | 10.8 | 2203.1 | 11 | 0.7  |
| Spot 308 | 1141215 | 1125137 | 516943.2 | 0.750 | 5.4 | 0.7 | 13.3 | 1.3 | 0.5 | 1.06 | 0.84011 | 2707.8 | 23.4 | 2700.0 | 11.9 | 2694.2 | 11 | -0.5 |
| Spot 309 | 1145891 | 1129747 | 237737.4 | 2.217 | 5.4 | 0.7 | 12.9 | 1.1 | 0.5 | 0.80 | 0.75570 | 2651.6 | 17.3 | 2675.9 | 9.9  | 2694.4 | 11 | 1.6  |
| Spot 310 | 1194430 | 1177602 | 273115.2 | 0.499 | 6.1 | 0.5 | 10.6 | 0.9 | 0.5 | 0.75 | 0.82420 | 2494.0 | 15.5 | 2488.2 | 8.4  | 2483.5 | 9  | -0.4 |
| Spot 311 | 1038432 | 1023802 | #####    | 1.717 | 8.6 | 0.6 | 5.5  | 1.0 | 0.3 | 0.72 | 0.75126 | 1895.9 | 11.8 | 1895.2 | 8.2  | 1894.3 | 11 | -0.1 |
| Spot 312 | 526298  | 518883  | 283402.7 | 1.485 | 7.4 | 0.6 | 7.2  | 1.0 | 0.4 | 0.81 | 0.78739 | 2119.3 | 14.6 | 2137.1 | 9.1  | 2154.2 | 11 | 1.6  |
| Spot 313 | 1133630 | 1117659 | 154734.5 | 1.691 | 7.6 | 0.5 | 7.1  | 1.0 | 0.4 | 0.83 | 0.86456 | 2131.4 | 15.1 | 2123.2 | 8.6  | 2115.3 | 8  | -0.8 |
| Spot 314 | 611509  | 602894  | 24122.2  | 1.072 | 7.3 | 0.9 | 7.4  | 1.3 | 0.4 | 0.93 | 0.70917 | 2156.8 | 17.1 | 2164.6 | 11.8 | 2172.0 | 16 | 0.7  |
| Spot 315 | 795137  | 783935  | 110893.7 | 1.158 | 6.0 | 0.6 | 11.2 | 1.2 | 0.5 | 1.04 | 0.86524 | 2555.5 | 21.9 | 2543.8 | 11.2 | 2534.6 | 10 | -0.8 |

**Run 1 (discordant Nov. 2021)**

|          |        |        |         |       |     |     |      |     |     |      |         |        |      |        |      |        |    |       |
|----------|--------|--------|---------|-------|-----|-----|------|-----|-----|------|---------|--------|------|--------|------|--------|----|-------|
| Spot 262 | 301603 | 297354 | 31107.5 | 2.707 | 7.7 | 0.9 | 7.9  | 1.4 | 0.4 | 1.07 | 0.76606 | 2339.5 | 21.1 | 2215.0 | 12.6 | 2101.8 | 16 | -11.3 |
| Spot 264 | 596700 | 588293 | 1625.7  | 1.804 | 3.2 | 1.7 | 32.5 | 1.9 | 0.8 | 0.86 | 0.44472 | 3644.3 | 24.1 | 3564.1 | 19.1 | 3519.3 | 27 | -3.6  |

**Run 2 (Nov.)**

|         |         |         |          |       |     |     |     |     |     |      |         |        |      |        |      |        |    |      |
|---------|---------|---------|----------|-------|-----|-----|-----|-----|-----|------|---------|--------|------|--------|------|--------|----|------|
| Spot 9  | 1042345 | 1103536 | 106097.0 | 2.417 | 7.5 | 0.8 | 7.4 | 1.4 | 0.4 | 1.19 | 0.84504 | 2185.4 | 22.1 | 2156.5 | 12.6 | 2129.1 | 13 | -2.6 |
| Spot 31 | 1066484 | 1129091 | 101376.9 | 1.570 | 7.2 | 0.7 | 7.9 | 1.1 | 0.4 | 0.93 | 0.81465 | 2257.4 | 17.7 | 2224.5 | 10.3 | 2194.3 | 11 | -2.9 |
| Spot 46 | 540149  | 571858  | 39802.8  | 2.058 | 7.6 | 0.6 | 6.8 | 1.1 | 0.4 | 0.88 | 0.81348 | 2072.1 | 15.6 | 2084.8 | 9.6  | 2097.4 | 11 | 1.2  |
| Spot 49 | 491231  | 520068  | 31087.3  | 2.066 | 7.3 | 0.8 | 7.3 | 1.3 | 0.4 | 0.99 | 0.76424 | 2124.4 | 17.8 | 2145.9 | 11.5 | 2166.4 | 15 | 1.9  |
| Spot 50 | 548803  | 581020  | 35726.1  | 1.621 | 8.3 | 0.8 | 5.8 | 1.4 | 0.4 | 1.18 | 0.81703 | 1943.8 | 19.7 | 1940.7 | 12.4 | 1937.4 | 15 | -0.3 |
| Spot 51 | 514925  | 545153  | 30305.5  | 1.604 | 7.2 | 0.6 | 7.3 | 1.1 | 0.4 | 0.89 | 0.83542 | 2127.5 | 16.1 | 2153.4 | 9.5  | 2178.2 | 10 | 2.3  |

|          |         |         |          |       |     |     |      |     |     |      |         |        |      |        |      |        |    |      |
|----------|---------|---------|----------|-------|-----|-----|------|-----|-----|------|---------|--------|------|--------|------|--------|----|------|
| Spot 53  | 1692700 | 1792070 | 94985.5  | 1.583 | 7.3 | 0.7 | 7.3  | 1.3 | 0.4 | 1.13 | 0.85120 | 2116.8 | 20.4 | 2144.8 | 11.9 | 2171.6 | 12 | 2.5  |
| Spot 66  | 1333105 | 1411365 | 98874.4  | 1.773 | 7.6 | 0.8 | 6.9  | 1.6 | 0.4 | 1.39 | 0.87842 | 2110.2 | 25.1 | 2100.9 | 14.1 | 2091.8 | 13 | -0.9 |
| Spot 68  | 1214219 | 1285500 | 233898.2 | 2.411 | 5.3 | 0.8 | 13.1 | 1.2 | 0.5 | 0.93 | 0.77788 | 2672.1 | 20.4 | 2688.7 | 11.3 | 2701.3 | 12 | 1.1  |
| Spot 72  | 1009393 | 1068649 | 287960.7 | 1.663 | 7.5 | 0.5 | 7.5  | 0.8 | 0.4 | 0.65 | 0.80171 | 2214.1 | 12.3 | 2170.1 | 7.3  | 2128.7 | 9  | -4.0 |
| Spot 75  | 178778  | 189273  | 19523.9  | 2.798 | 6.8 | 1.0 | 8.4  | 1.4 | 0.4 | 0.99 | 0.70347 | 2256.0 | 18.8 | 2270.7 | 12.8 | 2284.0 | 17 | 1.2  |
| Spot 79  | 255285  | 270272  | 52255.1  | 1.531 | 7.1 | 0.6 | 7.8  | 1.3 | 0.4 | 1.16 | 0.87277 | 2219.9 | 21.8 | 2212.4 | 12.0 | 2205.4 | 11 | -0.7 |
| Spot 84  | 1159328 | 1227386 | 96590.6  | 2.631 | 5.4 | 0.6 | 13.5 | 1.2 | 0.5 | 1.08 | 0.87081 | 2743.7 | 24.1 | 2714.6 | 11.7 | 2693.0 | 10 | -1.9 |
| Spot 86  | 683316  | 723429  | 94207.4  | 3.052 | 7.5 | 0.8 | 7.1  | 1.3 | 0.4 | 1.07 | 0.80464 | 2122.6 | 19.4 | 2126.9 | 11.9 | 2131.1 | 14 | 0.4  |
| Spot 87  | 1625553 | 1720981 | 140554.4 | 1.565 | 8.5 | 0.4 | 5.6  | 0.6 | 0.3 | 0.49 | 0.81240 | 1922.8 | 8.2  | 1909.5 | 5.2  | 1895.1 | 6  | -1.5 |
| Spot 92  | 935943  | 990887  | 150070.0 | 1.055 | 5.0 | 0.6 | 14.7 | 1.1 | 0.5 | 0.90 | 0.82722 | 2768.6 | 20.2 | 2799.2 | 10.3 | 2821.2 | 10 | 1.9  |
| Spot 93  | 1742848 | 1845161 | 992667.6 | 2.183 | 5.3 | 0.6 | 13.5 | 1.1 | 0.5 | 0.94 | 0.84939 | 2714.2 | 20.9 | 2711.9 | 10.5 | 2710.2 | 10 | -0.1 |
| Spot 111 | 1954261 | 2068985 | #####    | 2.205 | 7.6 | 0.6 | 7.2  | 1.0 | 0.4 | 0.81 | 0.79029 | 2155.5 | 14.8 | 2133.8 | 9.1  | 2113.0 | 11 | -2.0 |
| Spot 112 | 891846  | 944202  | 68574.6  | 3.495 | 7.3 | 0.7 | 7.4  | 1.3 | 0.4 | 1.11 | 0.83776 | 2163.2 | 20.3 | 2162.0 | 11.8 | 2160.9 | 13 | -0.1 |
| Spot 113 | 1014892 | 1074471 | 555166.9 | 1.482 | 7.6 | 0.6 | 7.0  | 1.2 | 0.4 | 0.99 | 0.84945 | 2125.1 | 18.0 | 2114.9 | 10.4 | 2105.0 | 11 | -1.0 |
| Spot 114 | 998029  | 1056618 | 130028.9 | 3.810 | 7.4 | 0.7 | 7.0  | 1.2 | 0.4 | 1.01 | 0.82448 | 2074.7 | 17.9 | 2106.5 | 10.9 | 2137.7 | 12 | 2.9  |
| Spot 115 | 287570  | 304452  | 88177.6  | 0.837 | 5.1 | 0.9 | 14.2 | 1.6 | 0.5 | 1.30 | 0.81790 | 2732.6 | 28.9 | 2761.2 | 15.1 | 2782.3 | 15 | 1.8  |
| Spot 117 | 1354635 | 1434159 | 224977.5 | 1.534 | 7.7 | 0.6 | 6.8  | 1.1 | 0.4 | 0.94 | 0.84385 | 2081.0 | 16.7 | 2082.6 | 9.9  | 2084.2 | 11 | 0.2  |
| Spot 129 | 632729  | 669873  | #####    | 3.573 | 7.4 | 0.8 | 7.3  | 1.7 | 0.4 | 1.45 | 0.87110 | 2147.5 | 26.5 | 2145.3 | 14.9 | 2143.2 | 14 | -0.2 |
| Spot 130 | 505562  | 535241  | 28706.1  | 1.117 | 7.4 | 1.0 | 7.3  | 1.4 | 0.4 | 1.04 | 0.72973 | 2178.2 | 19.1 | 2154.1 | 12.7 | 2131.2 | 17 | -2.2 |
| Spot 131 | 910938  | 964414  | 91346.3  | 1.916 | 7.6 | 0.6 | 7.0  | 1.1 | 0.4 | 0.96 | 0.84733 | 2107.0 | 17.2 | 2105.3 | 10.0 | 2103.7 | 11 | -0.2 |
| Spot 133 | 1308205 | 1385003 | 203494.7 | 1.514 | 7.3 | 0.4 | 7.8  | 0.9 | 0.4 | 0.80 | 0.87440 | 2239.8 | 15.2 | 2203.7 | 8.3  | 2170.3 | 8  | -3.2 |
| Spot 134 | 1020771 | 1080696 | #####    | 2.395 | 7.5 | 0.6 | 7.1  | 1.1 | 0.4 | 0.92 | 0.82172 | 2138.7 | 16.8 | 2128.7 | 10.0 | 2119.0 | 11 | -0.9 |
| Spot 135 | 808686  | 856159  | 99446.5  | 0.897 | 5.3 | 0.7 | 13.0 | 1.2 | 0.5 | 0.92 | 0.79972 | 2629.8 | 19.9 | 2676.2 | 10.9 | 2711.4 | 11 | 3.0  |
| Spot 137 | 644396  | 682225  | 39649.4  | 1.778 | 8.4 | 0.9 | 5.7  | 1.3 | 0.4 | 0.96 | 0.71064 | 1935.4 | 16.0 | 1926.5 | 11.6 | 1916.9 | 17 | -1.0 |
| Spot 138 | 588241  | 622773  | 22382.6  | 2.034 | 8.2 | 1.2 | 6.1  | 1.4 | 0.4 | 0.87 | 0.60185 | 2019.6 | 15.1 | 1983.9 | 12.6 | 1946.9 | 21 | -3.7 |
| Spot 139 | 380173  | 402492  | 77561.0  | 0.790 | 5.1 | 0.8 | 14.6 | 1.4 | 0.5 | 1.10 | 0.79780 | 2785.8 | 24.8 | 2787.2 | 13.1 | 2788.2 | 14 | 0.1  |
| Spot 147 | 1673105 | 1771325 | 443110.5 | 2.203 | 5.5 | 0.5 | 13.0 | 0.9 | 0.5 | 0.70 | 0.79592 | 2695.3 | 15.5 | 2676.3 | 8.3  | 2661.9 | 9  | -1.3 |
| Spot 148 | 1771141 | 1875116 | 160010.6 | 1.729 | 4.7 | 0.4 | 16.6 | 0.8 | 0.6 | 0.71 | 0.88088 | 2914.0 | 16.6 | 2911.3 | 7.7  | 2909.4 | 6  | -0.2 |
| Spot 152 | 426139  | 451155  | 109985.5 | 3.581 | 7.5 | 0.9 | 6.9  | 1.4 | 0.4 | 1.08 | 0.76941 | 2094.6 | 19.4 | 2103.6 | 12.5 | 2112.3 | 16 | 0.8  |
| Spot 153 | 762745  | 807522  | 118848.5 | 2.227 | 5.4 | 0.7 | 13.1 | 1.3 | 0.5 | 1.11 | 0.83843 | 2713.5 | 24.7 | 2688.7 | 12.5 | 2670.0 | 12 | -1.6 |
| Spot 156 | 557610  | 590345  | 150594.5 | 1.463 | 5.3 | 0.8 | 13.4 | 1.3 | 0.5 | 1.06 | 0.81218 | 2700.0 | 23.5 | 2707.0 | 12.4 | 2712.2 | 13 | 0.5  |
| Spot 160 | 1458910 | 1544555 | 210612.2 | 1.561 | 7.6 | 0.5 | 6.9  | 1.0 | 0.4 | 0.83 | 0.84134 | 2101.5 | 14.9 | 2103.0 | 8.7  | 2104.5 | 9  | 0.1  |
| Spot 161 | 2061096 | 2182092 | 347289.2 | 1.130 | 7.5 | 0.5 | 7.1  | 1.0 | 0.4 | 0.82 | 0.83656 | 2112.4 | 14.8 | 2122.3 | 8.7  | 2132.0 | 9  | 0.9  |
| Spot 162 | 1609944 | 1704455 | 828170.2 | 2.120 | 8.5 | 0.7 | 5.6  | 1.0 | 0.4 | 0.75 | 0.74419 | 1937.5 | 12.5 | 1917.1 | 8.7  | 1895.1 | 12 | -2.2 |
| Spot 166 | 584259  | 618558  | 152212.6 | 2.033 | 7.6 | 0.6 | 7.2  | 1.0 | 0.4 | 0.82 | 0.78550 | 2174.3 | 15.1 | 2140.6 | 9.3  | 2108.4 | 11 | -3.1 |
| Spot 167 | 1169284 | 1237927 | 216746.4 | 1.116 | 4.9 | 0.6 | 15.7 | 1.1 | 0.6 | 0.86 | 0.80467 | 2867.7 | 19.9 | 2859.9 | 10.2 | 2854.4 | 10 | -0.5 |
| Spot 168 | 1136516 | 1203235 | 331954.2 | 2.026 | 7.4 | 0.6 | 7.5  | 0.9 | 0.4 | 0.69 | 0.77796 | 2207.3 | 12.9 | 2178.6 | 8.0  | 2151.7 | 10 | -2.6 |
| Spot 170 | 1071992 | 1134923 | 54971.1  | 2.202 | 5.4 | 0.8 | 13.4 | 1.4 | 0.5 | 1.20 | 0.83170 | 2746.8 | 26.7 | 2705.1 | 13.6 | 2674.1 | 13 | -2.7 |
| Spot 174 | 987073  | 1045019 | 92094.3  | 2.119 | 5.3 | 0.5 | 13.0 | 1.2 | 0.5 | 1.05 | 0.89360 | 2666.1 | 22.9 | 2682.2 | 11.1 | 2694.4 | 9  | 1.0  |
| Spot 175 | 1131289 | 1197701 | 260871.9 | 1.526 | 5.4 | 0.7 | 13.1 | 1.4 | 0.5 | 1.21 | 0.88087 | 2694.5 | 26.7 | 2688.8 | 13.0 | 2684.6 | 11 | -0.4 |
| Spot 179 | 1174786 | 1243752 | 120814.2 | 2.108 | 5.4 | 0.5 | 13.6 | 1.0 | 0.5 | 0.82 | 0.84750 | 2772.4 | 18.6 | 2720.6 | 9.2  | 2682.3 | 9  | -3.4 |
| Spot 181 | 868458  | 919441  | 55305.5  | 2.249 | 7.4 | 0.8 | 7.4  | 1.4 | 0.4 | 1.07 | 0.79467 | 2175.5 | 19.8 | 2155.1 | 12.1 | 2135.8 | 14 | -1.9 |
| Spot 182 | 1425122 | 1508784 | 366920.0 | 1.403 | 7.7 | 0.7 | 6.8  | 1.1 | 0.4 | 0.85 | 0.77173 | 2089.8 | 15.2 | 2088.0 | 9.8  | 2086.3 | 12 | -0.2 |

|          |         |         |          |       |     |     |      |     |     |      |         |        |      |        |      |        |    |      |
|----------|---------|---------|----------|-------|-----|-----|------|-----|-----|------|---------|--------|------|--------|------|--------|----|------|
| Spot 186 | 380109  | 402424  | 33237.4  | 1.447 | 7.1 | 1.0 | 7.7  | 1.6 | 0.4 | 1.23 | 0.78479 | 2176.7 | 22.8 | 2194.2 | 14.1 | 2210.5 | 17 | 1.5  |
| Spot 188 | 672019  | 711470  | 93047.6  | 1.993 | 4.5 | 0.6 | 18.0 | 1.0 | 0.6 | 0.84 | 0.80498 | 3027.6 | 20.4 | 2990.0 | 10.1 | 2964.8 | 10 | -2.1 |
| Spot 189 | 335741  | 355450  | 115225.7 | 2.163 | 7.8 | 0.9 | 6.4  | 1.6 | 0.4 | 1.32 | 0.83195 | 2017.4 | 22.8 | 2037.5 | 13.9 | 2057.8 | 16 | 2.0  |
| Spot 190 | 148942  | 157686  | 39050.5  | 1.704 | 4.0 | 0.9 | 20.8 | 1.4 | 0.6 | 1.03 | 0.76056 | 3093.4 | 25.4 | 3130.1 | 13.2 | 3153.7 | 14 | 1.9  |
| Spot 191 | 329471  | 348813  | 32047.0  | 4.185 | 7.5 | 1.0 | 7.3  | 1.5 | 0.4 | 1.18 | 0.76311 | 2197.6 | 21.9 | 2150.9 | 13.8 | 2106.6 | 18 | -4.3 |
| Spot 193 | 2525289 | 2673536 | 225695.4 | 1.588 | 7.5 | 0.5 | 6.7  | 1.0 | 0.4 | 0.89 | 0.87283 | 2042.3 | 15.5 | 2078.0 | 9.0  | 2113.5 | 9  | 3.4  |
| Spot 196 | 1643014 | 1739467 | 268332.9 | 1.820 | 7.4 | 0.8 | 7.2  | 1.3 | 0.4 | 1.06 | 0.79961 | 2110.0 | 19.0 | 2130.8 | 11.8 | 2150.8 | 14 | 1.9  |
| Spot 197 | 1360824 | 1440711 | 221403.0 | 2.152 | 5.5 | 0.5 | 12.3 | 0.9 | 0.5 | 0.75 | 0.80783 | 2596.7 | 15.9 | 2631.3 | 8.7  | 2658.0 | 9  | 2.3  |
| Spot 198 | 615662  | 651805  | 109930.1 | 1.734 | 7.3 | 1.0 | 7.6  | 1.5 | 0.4 | 1.16 | 0.76197 | 2197.6 | 21.5 | 2179.9 | 13.6 | 2163.3 | 17 | -1.6 |
| Spot 200 | 1034931 | 1095686 | 269845.3 | 1.961 | 5.4 | 0.7 | 13.2 | 1.3 | 0.5 | 1.10 | 0.85573 | 2700.1 | 24.4 | 2693.2 | 12.2 | 2688.0 | 11 | -0.5 |
| Spot 201 | 1280123 | 1355273 | 229731.5 | 1.359 | 4.9 | 0.5 | 14.9 | 0.9 | 0.5 | 0.71 | 0.83610 | 2786.3 | 16.1 | 2808.3 | 8.1  | 2824.1 | 8  | 1.3  |
| Spot 203 | 280811  | 297295  | 14871.5  | 2.750 | 7.6 | 1.0 | 6.9  | 1.5 | 0.4 | 1.01 | 0.68190 | 2123.9 | 18.3 | 2104.0 | 13.2 | 2084.6 | 19 | -1.9 |
| Spot 205 | 310933  | 329186  | 45828.7  | 1.078 | 7.6 | 0.9 | 6.6  | 1.6 | 0.4 | 1.29 | 0.80661 | 2040.9 | 22.6 | 2063.9 | 14.1 | 2086.9 | 17 | 2.2  |
| Spot 217 | 736056  | 779266  | 87159.5  | 0.753 | 6.1 | 0.7 | 10.6 | 1.3 | 0.5 | 1.09 | 0.85491 | 2506.7 | 22.7 | 2488.6 | 11.9 | 2473.8 | 11 | -1.3 |
| Spot 219 | 823317  | 871650  | 258792.7 | 0.967 | 7.3 | 0.5 | 7.5  | 0.9 | 0.4 | 0.74 | 0.82641 | 2171.0 | 13.5 | 2174.1 | 8.0  | 2177.1 | 9  | 0.3  |
| Spot 224 | 958809  | 1015096 | 678548.1 | 1.416 | 7.4 | 0.6 | 7.3  | 1.0 | 0.4 | 0.89 | 0.85025 | 2161.7 | 16.3 | 2152.6 | 9.3  | 2144.0 | 10 | -0.8 |
| Spot 226 | 1420202 | 1503575 | 153427.2 | 1.388 | 8.5 | 0.5 | 5.6  | 1.1 | 0.4 | 0.94 | 0.89108 | 1936.6 | 15.7 | 1917.7 | 9.1  | 1897.2 | 9  | -2.1 |
| Spot 227 | 254759  | 269714  | 21903.8  | 2.344 | 7.4 | 0.9 | 7.6  | 1.3 | 0.4 | 0.88 | 0.69841 | 2221.5 | 16.6 | 2182.2 | 11.3 | 2145.4 | 16 | -3.5 |
| Spot 232 | 1409676 | 1492431 | 201532.8 | 1.218 | 5.6 | 0.5 | 12.2 | 1.0 | 0.5 | 0.84 | 0.83781 | 2609.0 | 18.0 | 2617.7 | 9.4  | 2624.5 | 9  | 0.6  |
| Spot 233 | 660957  | 699758  | 49602.3  | 3.599 | 7.5 | 0.8 | 7.2  | 1.5 | 0.4 | 1.27 | 0.85609 | 2163.4 | 23.4 | 2140.3 | 13.3 | 2118.2 | 13 | -2.1 |
| Spot 234 | 529261  | 560332  | 33273.2  | 2.902 | 6.9 | 0.6 | 8.3  | 1.0 | 0.4 | 0.86 | 0.82562 | 2261.2 | 16.3 | 2259.4 | 9.4  | 2257.8 | 10 | -0.2 |
| Spot 235 | 413762  | 438052  | 35721.1  | 1.611 | 7.3 | 0.8 | 7.1  | 1.4 | 0.4 | 1.20 | 0.84469 | 2072.2 | 21.3 | 2125.0 | 12.7 | 2176.5 | 13 | 4.8  |
| Spot 236 | 686479  | 726778  | 45689.9  | 3.518 | 7.5 | 0.6 | 7.1  | 1.1 | 0.4 | 0.89 | 0.84536 | 2122.8 | 16.1 | 2125.7 | 9.4  | 2128.4 | 10 | 0.3  |
| Spot 238 | 1437385 | 1521766 | 102270.6 | 2.162 | 7.4 | 0.7 | 7.4  | 1.4 | 0.4 | 1.24 | 0.88096 | 2166.2 | 22.9 | 2154.9 | 12.6 | 2144.2 | 12 | -1.0 |
| Spot 239 | 347637  | 368045  | 233685.0 | 0.926 | 5.2 | 0.8 | 13.9 | 1.5 | 0.5 | 1.30 | 0.84632 | 2733.4 | 29.0 | 2743.0 | 14.6 | 2750.1 | 13 | 0.6  |
| Spot 241 | 1555017 | 1646304 | 136823.8 | 2.008 | 5.3 | 0.6 | 13.0 | 1.0 | 0.5 | 0.75 | 0.77326 | 2657.6 | 16.4 | 2681.7 | 9.2  | 2699.9 | 10 | 1.6  |
| Spot 242 | 1481614 | 1568592 | 694138.2 | 2.092 | 5.3 | 0.7 | 13.1 | 1.1 | 0.5 | 0.87 | 0.80031 | 2653.5 | 18.9 | 2688.9 | 10.2 | 2715.6 | 11 | 2.3  |
| Spot 251 | 581699  | 615848  | 71635.0  | 2.134 | 7.4 | 0.9 | 7.4  | 1.3 | 0.4 | 0.87 | 0.69142 | 2170.2 | 16.1 | 2159.2 | 11.3 | 2148.7 | 16 | -1.0 |
| Spot 253 | 843079  | 892572  | 285495.7 | 0.888 | 7.4 | 0.6 | 7.3  | 1.2 | 0.4 | 1.03 | 0.85290 | 2159.2 | 18.8 | 2147.2 | 10.8 | 2135.8 | 11 | -1.1 |
| Spot 254 | 575857  | 609663  | 107893.5 | 1.028 | 7.9 | 0.9 | 6.6  | 1.3 | 0.4 | 0.90 | 0.71626 | 2086.2 | 16.1 | 2057.8 | 11.1 | 2029.5 | 16 | -2.8 |
| Spot 256 | 2510865 | 2658265 | 564209.1 | 0.773 | 7.5 | 0.9 | 6.9  | 1.5 | 0.4 | 1.20 | 0.79556 | 2073.3 | 21.3 | 2097.9 | 13.4 | 2122.0 | 16 | 2.3  |
| Spot 257 | 1357050 | 1436716 | 127291.6 | 0.983 | 7.5 | 0.7 | 7.2  | 1.1 | 0.4 | 0.87 | 0.77306 | 2158.0 | 15.9 | 2140.8 | 10.0 | 2124.3 | 12 | -1.6 |
| Spot 258 | 577408  | 611305  | 91841.2  | 0.950 | 5.3 | 0.6 | 14.1 | 1.0 | 0.5 | 0.79 | 0.81291 | 2813.9 | 18.1 | 2756.1 | 9.3  | 2714.1 | 9  | -3.7 |
| Spot 260 | 189991  | 201144  | 14471.1  | 0.675 | 7.6 | 1.1 | 6.6  | 1.5 | 0.4 | 0.95 | 0.62864 | 2050.3 | 16.7 | 2064.4 | 13.3 | 2078.6 | 21 | 1.4  |
| Spot 261 | 506010  | 535715  | 93938.5  | 1.814 | 7.2 | 0.9 | 7.7  | 1.5 | 0.4 | 1.20 | 0.80896 | 2198.3 | 22.4 | 2194.5 | 13.3 | 2190.9 | 15 | -0.3 |
| Spot 262 | 966366  | 1023096 | 84477.5  | 0.804 | 7.9 | 0.6 | 6.5  | 1.6 | 0.4 | 1.44 | 0.91574 | 2040.1 | 25.2 | 2040.2 | 13.9 | 2040.4 | 11 | 0.0  |
| Spot 263 | 1358911 | 1438686 | 95319.9  | 2.283 | 5.2 | 0.9 | 13.4 | 1.6 | 0.5 | 1.32 | 0.83090 | 2685.3 | 29.0 | 2709.4 | 15.0 | 2727.4 | 15 | 1.5  |
| Spot 264 | 1396727 | 1478722 | 114232.6 | 2.136 | 5.0 | 0.7 | 14.5 | 1.1 | 0.5 | 0.93 | 0.81950 | 2757.3 | 20.9 | 2780.6 | 10.8 | 2797.5 | 11 | 1.4  |
| Spot 265 | 923816  | 978048  | 89398.8  | 1.954 | 5.5 | 0.6 | 13.0 | 0.9 | 0.5 | 0.64 | 0.74738 | 2703.5 | 14.2 | 2677.9 | 8.1  | 2658.6 | 9  | -1.7 |
| Spot 267 | 1096495 | 1160864 | 151789.4 | 2.052 | 5.4 | 0.4 | 13.1 | 0.8 | 0.5 | 0.68 | 0.85052 | 2683.0 | 14.9 | 2684.8 | 7.5  | 2686.2 | 7  | 0.1  |
| Spot 268 | 873253  | 924517  | 122016.3 | 2.015 | 5.4 | 0.4 | 13.6 | 0.8 | 0.5 | 0.71 | 0.85372 | 2754.1 | 16.0 | 2720.0 | 7.9  | 2694.8 | 7  | -2.2 |
| Spot 269 | 812521  | 860220  | 260562.4 | 2.331 | 5.1 | 0.6 | 14.7 | 1.2 | 0.6 | 1.06 | 0.87279 | 2835.4 | 24.4 | 2798.5 | 11.6 | 2771.9 | 10 | -2.3 |
| Spot 270 | 1385256 | 1466578 | 254832.5 | 2.026 | 5.4 | 0.5 | 13.3 | 0.8 | 0.5 | 0.66 | 0.81578 | 2717.3 | 14.6 | 2703.7 | 7.6  | 2693.5 | 8  | -0.9 |

|          |         |         |          |       |     |     |      |     |     |      |         |        |      |        |      |        |    |      |
|----------|---------|---------|----------|-------|-----|-----|------|-----|-----|------|---------|--------|------|--------|------|--------|----|------|
| Spot 271 | 1220750 | 1292414 | 140787.6 | 2.434 | 5.4 | 0.6 | 12.4 | 1.3 | 0.5 | 1.16 | 0.87486 | 2574.9 | 24.7 | 2635.9 | 12.5 | 2683.1 | 11 | 4.0  |
| Spot 278 | 635620  | 672934  | 93833.2  | 2.999 | 7.5 | 0.8 | 7.0  | 1.5 | 0.4 | 1.32 | 0.85420 | 2102.4 | 23.6 | 2116.5 | 13.7 | 2130.3 | 14 | 1.3  |
| Spot 280 | 1057873 | 1119976 | 80516.9  | 3.336 | 7.5 | 0.8 | 7.0  | 1.3 | 0.4 | 1.10 | 0.82597 | 2094.2 | 19.7 | 2107.4 | 11.8 | 2120.4 | 13 | 1.2  |
| Spot 283 | 1466545 | 1552638 | 138929.3 | 1.404 | 3.8 | 0.7 | 22.5 | 1.2 | 0.6 | 0.98 | 0.83013 | 3142.1 | 24.3 | 3203.7 | 11.4 | 3242.5 | 10 | 3.1  |
| Spot 284 | 1196455 | 1266693 | 90428.2  | 2.120 | 5.4 | 0.7 | 13.4 | 1.3 | 0.5 | 1.07 | 0.84563 | 2727.4 | 23.8 | 2706.4 | 12.0 | 2690.8 | 11 | -1.4 |
| Spot 286 | 981858  | 1039498 | 70265.7  | 2.862 | 7.6 | 1.1 | 7.2  | 1.7 | 0.4 | 1.33 | 0.77410 | 2188.4 | 24.6 | 2137.6 | 15.3 | 2089.1 | 19 | -4.8 |
| Spot 288 | 436711  | 462348  | 441759.9 | 1.620 | 7.6 | 0.6 | 7.1  | 1.0 | 0.4 | 0.82 | 0.82178 | 2139.6 | 14.8 | 2123.0 | 8.8  | 2107.1 | 10 | -1.5 |
| Spot 289 | 1607864 | 1702253 | 909599.6 | 1.064 | 3.5 | 0.3 | 26.4 | 0.7 | 0.7 | 0.62 | 0.87311 | 3339.2 | 16.3 | 3361.1 | 7.0  | 3374.2 | 5  | 1.0  |
| Spot 290 | 2072994 | 2194689 | 223371.0 | 1.849 | 8.5 | 0.5 | 5.6  | 1.0 | 0.3 | 0.88 | 0.86136 | 1929.2 | 14.8 | 1912.5 | 8.8  | 1894.5 | 9  | -1.8 |
| Spot 291 | 2539858 | 2688960 | 304900.0 | 1.555 | 7.4 | 0.6 | 7.2  | 0.9 | 0.4 | 0.74 | 0.78232 | 2127.0 | 13.4 | 2137.3 | 8.4  | 2147.1 | 10 | 0.9  |
| Spot 292 | 1313497 | 1390606 | #####    | 2.233 | 5.9 | 0.7 | 10.8 | 1.4 | 0.5 | 1.15 | 0.84722 | 2473.5 | 23.6 | 2506.3 | 12.6 | 2532.9 | 12 | 2.3  |
| Spot 293 | 817270  | 865248  | 57942.1  | 1.881 | 8.2 | 0.7 | 5.8  | 1.3 | 0.4 | 1.10 | 0.83035 | 1937.2 | 18.3 | 1950.1 | 11.4 | 1963.7 | 13 | 1.3  |
| Spot 297 | 1483460 | 1570546 | 98585.4  | 0.954 | 7.8 | 0.4 | 6.5  | 0.8 | 0.4 | 0.76 | 0.90324 | 2042.7 | 13.3 | 2043.7 | 7.4  | 2044.6 | 6  | 0.1  |
| Spot 298 | 947589  | 1003217 | 72769.2  | 1.538 | 8.4 | 0.7 | 5.7  | 1.1 | 0.4 | 0.91 | 0.79348 | 1950.3 | 15.2 | 1930.9 | 9.9  | 1910.1 | 12 | -2.1 |
| Spot 299 | 890460  | 942734  | 277878.0 | 2.193 | 5.5 | 0.8 | 12.7 | 1.4 | 0.5 | 1.14 | 0.83402 | 2663.2 | 24.8 | 2656.9 | 12.8 | 2652.1 | 12 | -0.4 |
| Spot 300 | 824000  | 872372  | 43410.4  | 2.580 | 7.5 | 0.5 | 7.4  | 0.8 | 0.4 | 0.59 | 0.77739 | 2198.6 | 11.0 | 2156.2 | 6.8  | 2116.0 | 8  | -3.9 |
| Spot 302 | 345143  | 365404  | 31144.7  | 1.659 | 5.3 | 0.7 | 13.1 | 1.1 | 0.5 | 0.85 | 0.77222 | 2679.0 | 18.7 | 2688.8 | 10.4 | 2696.2 | 12 | 0.6  |
| Spot 308 | 1516163 | 1605169 | 102689.5 | 1.627 | 8.6 | 0.8 | 5.4  | 1.2 | 0.3 | 0.91 | 0.76014 | 1879.4 | 14.9 | 1880.7 | 10.3 | 1882.2 | 14 | 0.1  |
| Spot 310 | 409062  | 433076  | 48499.8  | 2.162 | 7.3 | 0.6 | 7.5  | 1.1 | 0.4 | 0.95 | 0.82538 | 2189.5 | 17.6 | 2175.5 | 10.3 | 2162.4 | 11 | -1.3 |
| Spot 311 | 1585843 | 1678940 | 138639.3 | 1.968 | 5.8 | 0.6 | 11.1 | 0.9 | 0.5 | 0.72 | 0.76333 | 2506.9 | 14.9 | 2531.9 | 8.8  | 2552.1 | 10 | 1.8  |
| Spot 312 | 816158  | 864071  | 109425.0 | 2.195 | 5.5 | 0.7 | 12.3 | 1.3 | 0.5 | 1.12 | 0.85691 | 2623.0 | 24.0 | 2629.9 | 12.2 | 2635.2 | 11 | 0.5  |
| Spot 314 | 1550340 | 1641352 | 156444.2 | 2.628 | 7.5 | 0.7 | 7.2  | 1.3 | 0.4 | 1.04 | 0.81161 | 2137.8 | 18.9 | 2134.5 | 11.4 | 2131.4 | 13 | -0.3 |
| Spot 315 | 1056780 | 1118818 | 143545.7 | 2.441 | 5.4 | 0.7 | 13.2 | 1.5 | 0.5 | 1.31 | 0.87200 | 2695.3 | 28.8 | 2694.5 | 14.1 | 2694.0 | 12 | 0.0  |

**Run 2 Rora Med discordant (Nov. 2021)**

|          |        |        |          |       |     |     |      |     |     |      |         |        |      |        |      |        |    |       |
|----------|--------|--------|----------|-------|-----|-----|------|-----|-----|------|---------|--------|------|--------|------|--------|----|-------|
| Spot 132 | 661566 | 700403 | 108601.0 | 0.872 | 8.0 | 0.6 | 6.8  | 1.1 | 0.4 | 0.86 | 0.80133 | 2158.3 | 15.7 | 2088.2 | 9.5  | 2019.8 | 11 | -6.9  |
| Spot 136 | 9158   | 9696   | 3000.0   | 0.432 | 5.1 | 1.0 | 31.5 | 1.2 | 1.2 | 0.60 | 0.51448 | 4989.8 | 20.8 | 3535.1 | 11.5 | 2789.6 | 16 | -78.9 |
| Spot 252 | 662970 | 701890 | 59896.9  | 1.789 | 8.6 | 0.6 | 5.8  | 1.1 | 0.4 | 0.90 | 0.82815 | 2001.1 | 15.4 | 1947.2 | 9.4  | 1890.5 | 11 | -5.9  |
| Spot 309 | 926342 | 980723 | 179820.7 | 0.969 | 7.6 | 0.6 | 7.5  | 1.0 | 0.4 | 0.77 | 0.77551 | 2247.9 | 14.5 | 2178.9 | 8.9  | 2114.5 | 11 | -6.3  |

**Run 1 (Sept. 2022)**

|          |         |         |          |       |     |     |      |     |     |      |         |        |      |        |      |        |    |       |
|----------|---------|---------|----------|-------|-----|-----|------|-----|-----|------|---------|--------|------|--------|------|--------|----|-------|
| Erin-RMA | 526676  | 436143  | 32881.2  | 2.082 | 7.1 | 0.5 | 8.0  | 0.8 | 0.4 | 0.57 | 0.72398 | 2243.9 | 10.9 | 2226.1 | 7.1  | 2209.8 | 9  | -1.55 |
| Erin-RMA | 1380939 | 1143562 | 63966.3  | 2.164 | 5.3 | 0.4 | 13.2 | 0.7 | 0.5 | 0.56 | 0.80122 | 2682.5 | 12.2 | 2691.4 | 6.6  | 2698.0 | 7  | 0.57  |
| Erin-RMA | 350229  | 290026  | 23668.3  | 0.719 | 7.5 | 0.7 | 7.1  | 1.0 | 0.4 | 0.66 | 0.67747 | 2136.9 | 12.0 | 2126.7 | 8.7  | 2116.9 | 13 | -0.94 |
| Erin-RMA | 1351274 | 1118996 | 57979.6  | 1.974 | 7.6 | 0.5 | 7.0  | 0.8 | 0.4 | 0.57 | 0.74801 | 2136.1 | 10.3 | 2115.9 | 6.7  | 2096.3 | 9  | -1.9  |
| Erin-RMA | 407252  | 337247  | 120006.0 | 1.925 | 7.1 | 0.5 | 7.7  | 0.9 | 0.4 | 0.66 | 0.77193 | 2187.8 | 12.3 | 2199.8 | 7.7  | 2211.0 | 9  | 1.05  |
| Erin-RMA | 876407  | 725757  | 154142.2 | 1.055 | 5.6 | 0.5 | 12.4 | 0.8 | 0.5 | 0.61 | 0.75219 | 2643.9 | 13.3 | 2634.4 | 7.7  | 2627.1 | 9  | -0.64 |
| Erin-RMA | 60679   | 50248   | 23687.8  | 3.533 | 7.0 | 1.2 | 7.3  | 1.6 | 0.4 | 0.99 | 0.62915 | 2046.4 | 17.3 | 2145.0 | 14.0 | 2240.8 | 21 | 8.67  |
| Erin-RMA | 223597  | 185162  | 37281.1  | 0.963 | 7.5 | 0.7 | 6.9  | 0.9 | 0.4 | 0.59 | 0.62210 | 2075.3 | 10.4 | 2092.7 | 8.4  | 2109.9 | 13 | 1.64  |
| Erin-RMA | 1357807 | 1124406 | 45984.0  | 2.018 | 6.0 | 0.4 | 10.7 | 0.8 | 0.5 | 0.61 | 0.80912 | 2474.3 | 12.6 | 2496.4 | 7.1  | 2514.4 | 8  | 1.59  |
| Erin-RMA | 781245  | 646953  | 119714.5 | 1.817 | 7.1 | 0.6 | 8.0  | 0.9 | 0.4 | 0.68 | 0.77850 | 2256.3 | 13.0 | 2233.0 | 7.9  | 2211.7 | 10 | -2.01 |
| Erin-RMA | 570727  | 472621  | 179747.8 | 2.908 | 6.0 | 0.5 | 10.7 | 0.8 | 0.5 | 0.60 | 0.74864 | 2491.0 | 12.3 | 2494.0 | 7.4  | 2496.5 | 9  | 0.22  |
| Erin-RMA | 1358627 | 1125086 | 42251.5  | 2.295 | 7.3 | 0.5 | 7.6  | 0.8 | 0.4 | 0.58 | 0.73991 | 2199.8 | 10.8 | 2188.1 | 7.0  | 2177.2 | 9  | -1.04 |
| Erin-RMA | 583332  | 483060  | 35853.9  | 2.550 | 7.4 | 0.7 | 7.2  | 1.0 | 0.4 | 0.75 | 0.74323 | 2142.8 | 13.7 | 2139.0 | 9.0  | 2135.3 | 12 | -0.35 |
| Erin-RMA | 1339713 | 1109423 | 65450.9  | 2.184 | 5.3 | 0.4 | 13.3 | 0.8 | 0.5 | 0.67 | 0.85199 | 2694.5 | 14.8 | 2697.8 | 7.4  | 2700.2 | 7  | 0.21  |



|          |         |         |          |       |     |     |      |     |     |      |         |        |      |        |      |        |    |       |
|----------|---------|---------|----------|-------|-----|-----|------|-----|-----|------|---------|--------|------|--------|------|--------|----|-------|
| Erin-RMA | 1350490 | 1118347 | 56887.0  | 1.948 | 6.9 | 0.5 | 8.3  | 0.8 | 0.4 | 0.63 | 0.80257 | 2244.8 | 11.9 | 2259.2 | 7.1  | 2272.1 | 8  | 1.2   |
| Erin-RMA | 2000445 | 1656578 | 94154.2  | 2.176 | 5.3 | 0.4 | 13.2 | 0.7 | 0.5 | 0.58 | 0.82976 | 2680.5 | 12.8 | 2695.1 | 6.6  | 2706.0 | 6  | 0.94  |
| Erin-RMA | 492494  | 407837  | 101449.6 | 2.372 | 7.2 | 0.5 | 7.5  | 0.7 | 0.4 | 0.52 | 0.73738 | 2162.5 | 9.6  | 2178.0 | 6.4  | 2192.6 | 8  | 1.37  |
| Erin-RMA | 1663737 | 1377749 | 133277.5 | 1.315 | 7.6 | 0.5 | 7.0  | 0.8 | 0.4 | 0.61 | 0.75624 | 2130.2 | 11.0 | 2114.0 | 7.2  | 2098.3 | 9  | -1.52 |
| Erin-RMA | 634271  | 525243  | 330801.6 | 2.054 | 7.3 | 0.5 | 7.6  | 0.8 | 0.4 | 0.61 | 0.76958 | 2207.8 | 11.4 | 2189.7 | 7.1  | 2172.8 | 9  | -1.61 |
| Erin-RMA | 1405338 | 1163767 | 63190.1  | 1.768 | 5.0 | 0.4 | 15.2 | 0.7 | 0.6 | 0.58 | 0.84915 | 2845.5 | 13.3 | 2830.0 | 6.5  | 2819.0 | 6  | -0.94 |
| Erin-RMA | 2010832 | 1665180 | 111243.9 | 2.209 | 5.3 | 0.4 | 13.2 | 0.7 | 0.5 | 0.60 | 0.84218 | 2691.1 | 13.1 | 2697.6 | 6.7  | 2702.4 | 6  | 0.42  |
| Erin-RMA | 984304  | 815107  | 66334.0  | 2.017 | 7.2 | 0.5 | 7.5  | 0.8 | 0.4 | 0.58 | 0.76011 | 2158.6 | 10.6 | 2174.5 | 6.8  | 2189.6 | 9  | 1.42  |
| Erin-RMA | 676897  | 560541  | #####    | 1.718 | 7.3 | 0.5 | 7.6  | 0.8 | 0.4 | 0.64 | 0.78664 | 2197.5 | 11.9 | 2182.5 | 7.3  | 2168.4 | 9  | -1.34 |
| Erin-RMA | 930899  | 770882  | 220135.1 | 1.524 | 7.3 | 0.5 | 7.5  | 0.7 | 0.4 | 0.55 | 0.74466 | 2171.2 | 10.2 | 2168.5 | 6.7  | 2165.8 | 9  | -0.25 |
| Erin-RMA | 819122  | 678319  | 57280.2  | 1.666 | 7.4 | 0.5 | 7.4  | 0.9 | 0.4 | 0.73 | 0.83984 | 2181.0 | 13.5 | 2158.1 | 7.8  | 2136.4 | 8  | -2.09 |
| Erin-RMA | 943417  | 781248  | 51775.8  | 5.137 | 7.6 | 0.6 | 7.1  | 1.1 | 0.4 | 0.88 | 0.82163 | 2146.3 | 16.0 | 2121.5 | 9.5  | 2097.5 | 11 | -2.33 |
| Erin-RMA | 87740   | 72658   | 19386.3  | 1.186 | 7.5 | 1.3 | 7.2  | 1.8 | 0.4 | 1.15 | 0.64978 | 2167.8 | 21.2 | 2137.0 | 15.8 | 2107.6 | 24 | -2.86 |
| Erin-RMA | 3330791 | 2758244 | 96211.2  | 1.043 | 7.1 | 0.4 | 7.7  | 0.7 | 0.4 | 0.59 | 0.84027 | 2194.4 | 11.0 | 2201.1 | 6.4  | 2207.4 | 7  | 0.59  |
| Erin-RMA | 594189  | 492051  | 31961.0  | 2.519 | 6.7 | 1.0 | 8.6  | 1.3 | 0.4 | 0.78 | 0.61142 | 2266.8 | 14.8 | 2296.0 | 11.6 | 2322.0 | 17 | 2.38  |
| Erin-RMA | 1389243 | 1150438 | 44776.3  | 2.057 | 8.5 | 0.6 | 5.5  | 0.9 | 0.3 | 0.65 | 0.75100 | 1919.6 | 10.7 | 1906.4 | 7.4  | 1892.1 | 10 | -1.45 |
| Erin-RMA | 1272230 | 1053540 | 288690.1 | 3.738 | 5.3 | 0.5 | 12.5 | 0.7 | 0.5 | 0.57 | 0.76032 | 2546.8 | 12.0 | 2645.9 | 7.0  | 2722.7 | 8  | 6.46  |
| Erin-RMA | 278916  | 230971  | 57389.1  | 1.394 | 7.1 | 0.9 | 7.7  | 1.1 | 0.4 | 0.63 | 0.58179 | 2187.9 | 11.7 | 2201.2 | 9.7  | 2213.6 | 15 | 1.16  |
| Erin-RMA | 2206244 | 1827001 | 394493.4 | 1.414 | 7.6 | 0.4 | 7.0  | 0.7 | 0.4 | 0.56 | 0.79749 | 2112.5 | 10.0 | 2105.8 | 6.2  | 2099.2 | 7  | -0.63 |
| Erin-RMA | 1682141 | 1392988 | 147307.3 | 2.867 | 8.5 | 0.5 | 5.5  | 0.9 | 0.3 | 0.71 | 0.82182 | 1904.2 | 11.6 | 1901.2 | 7.4  | 1897.9 | 9  | -0.33 |
| Erin-RMA | 1025695 | 849383  | 58003.8  | 2.368 | 7.4 | 0.4 | 7.1  | 0.8 | 0.4 | 0.65 | 0.82292 | 2100.0 | 11.6 | 2123.4 | 7.0  | 2146.1 | 8  | 2.15  |
| Erin-RMA | 805543  | 667074  | 24759.2  | 1.919 | 7.4 | 0.5 | 7.3  | 0.9 | 0.4 | 0.72 | 0.82205 | 2142.1 | 13.2 | 2143.9 | 7.8  | 2145.6 | 9  | 0.16  |
| Erin-RMA | 963554  | 797924  | 27692.1  | 2.437 | 6.9 | 0.5 | 8.5  | 0.8 | 0.4 | 0.62 | 0.76765 | 2310.4 | 12.0 | 2287.4 | 7.3  | 2266.9 | 9  | -1.92 |
| Erin-RMA | 657313  | 544324  | 51692.7  | 1.683 | 8.1 | 0.6 | 6.1  | 0.8 | 0.4 | 0.45 | 0.60472 | 1988.8 | 7.8  | 1986.7 | 6.5  | 1984.5 | 11 | -0.22 |
| Erin-RMA | 1353156 | 1120554 | 103048.8 | 3.949 | 6.0 | 0.5 | 10.1 | 0.8 | 0.4 | 0.53 | 0.69985 | 2372.5 | 10.6 | 2448.0 | 7.1  | 2511.3 | 9  | 5.53  |
| Erin-RMA | 894147  | 740448  | 33846.1  | 1.886 | 7.6 | 0.6 | 6.9  | 0.9 | 0.4 | 0.66 | 0.75910 | 2095.0 | 11.8 | 2098.9 | 7.7  | 2102.7 | 10 | 0.37  |
| Erin-RMA | 1035914 | 857845  | 75330.4  | 2.526 | 6.8 | 0.3 | 8.6  | 0.6 | 0.4 | 0.46 | 0.79943 | 2296.7 | 8.9  | 2292.5 | 5.2  | 2288.8 | 6  | -0.35 |
| Erin-RMA | 968068  | 801662  | 43094.8  | 0.516 | 4.7 | 0.4 | 16.3 | 0.8 | 0.6 | 0.65 | 0.85494 | 2894.0 | 15.2 | 2893.3 | 7.3  | 2892.8 | 6  | -0.04 |
| Erin-RMA | 1695335 | 1403915 | 56887.4  | 4.796 | 7.5 | 0.5 | 7.3  | 0.7 | 0.4 | 0.54 | 0.76093 | 2158.9 | 9.9  | 2143.4 | 6.4  | 2128.5 | 8  | -1.43 |
| Erin-RMA | 5302360 | 4390909 | 88432.6  | 9.635 | 7.4 | 0.4 | 7.0  | 1.0 | 0.4 | 0.94 | 0.90491 | 2082.3 | 16.8 | 2111.2 | 9.2  | 2139.6 | 8  | 2.68  |
| Erin-RMA | 540317  | 447439  | 42637.5  | 3.278 | 7.4 | 0.5 | 7.3  | 0.8 | 0.4 | 0.56 | 0.74406 | 2165.4 | 10.3 | 2149.1 | 6.7  | 2133.5 | 9  | -1.5  |
| Erin-RMA | 2341055 | 1938638 | 102296.9 | 1.743 | 5.3 | 0.4 | 13.3 | 0.8 | 0.5 | 0.69 | 0.88897 | 2687.3 | 15.1 | 2702.3 | 7.3  | 2713.5 | 6  | 0.97  |
| Erin-RMA | 315845  | 261553  | 10836.4  | 2.047 | 7.4 | 0.6 | 7.0  | 0.9 | 0.4 | 0.56 | 0.63533 | 2105.0 | 10.1 | 2115.9 | 7.8  | 2126.6 | 12 | 1.02  |
| Erin-RMA | 591862  | 490124  | 86621.2  | 1.653 | 7.6 | 0.6 | 7.2  | 0.7 | 0.4 | 0.39 | 0.55864 | 2173.6 | 7.1  | 2133.9 | 6.2  | 2095.9 | 10 | -3.71 |
| Erin-RMA | 238159  | 197220  | 5824.5   | 2.952 | 7.2 | 0.7 | 7.3  | 1.0 | 0.4 | 0.70 | 0.69517 | 2144.0 | 12.8 | 2153.3 | 9.0  | 2162.2 | 13 | 0.84  |
| Erin-RMA | 1277711 | 1058079 | 160784.9 | 2.206 | 7.5 | 0.5 | 7.0  | 0.9 | 0.4 | 0.72 | 0.81333 | 2100.0 | 12.9 | 2105.9 | 7.8  | 2111.6 | 9  | 0.55  |
| Erin-RMA | 878670  | 727630  | #####    | 2.039 | 7.6 | 0.6 | 7.0  | 0.8 | 0.4 | 0.51 | 0.62448 | 2123.6 | 9.3  | 2108.9 | 7.3  | 2094.5 | 11 | -1.39 |
| Erin-RMA | 608396  | 503816  | 64386.4  | 2.476 | 7.3 | 0.5 | 7.3  | 0.8 | 0.4 | 0.61 | 0.74862 | 2140.3 | 11.2 | 2151.6 | 7.3  | 2162.5 | 9  | 1.03  |
| Erin-RMA | 1573226 | 1302795 | 599457.1 | 1.633 | 8.5 | 0.4 | 5.5  | 0.7 | 0.3 | 0.54 | 0.78629 | 1893.6 | 8.9  | 1897.8 | 5.9  | 1902.3 | 8  | 0.46  |
| Erin-RMA | 2875128 | 2380907 | 113979.0 | 1.532 | 7.4 | 0.5 | 7.2  | 0.8 | 0.4 | 0.62 | 0.79245 | 2133.2 | 11.3 | 2138.4 | 7.0  | 2143.3 | 8  | 0.47  |
| Erin-RMA | 323630  | 267999  | 30524.1  | 1.964 | 7.2 | 0.7 | 7.8  | 1.0 | 0.4 | 0.67 | 0.68694 | 2226.6 | 12.5 | 2203.5 | 8.7  | 2182.0 | 12 | -2.05 |
| Erin-RMA | 2404077 | 1990827 | 526214.1 | 1.101 | 7.6 | 0.5 | 6.9  | 0.8 | 0.4 | 0.67 | 0.80898 | 2079.2 | 11.8 | 2094.4 | 7.3  | 2109.4 | 8  | 1.43  |
| Erin-RMA | 1570077 | 1300188 | 76501.5  | 2.458 | 5.3 | 0.5 | 13.3 | 0.7 | 0.5 | 0.55 | 0.77102 | 2702.0 | 12.0 | 2703.3 | 6.7  | 2704.3 | 7  | 0.09  |

|          |         |         |          |       |     |     |      |     |     |      |         |        |      |        |      |        |    |       |
|----------|---------|---------|----------|-------|-----|-----|------|-----|-----|------|---------|--------|------|--------|------|--------|----|-------|
| Erin-RMA | 1277589 | 1057978 | 59019.9  | 0.957 | 7.5 | 0.5 | 7.0  | 0.7 | 0.4 | 0.51 | 0.71501 | 2109.7 | 9.1  | 2113.9 | 6.3  | 2118.0 | 9  | 0.4   |
| Erin-RMA | 1021406 | 845831  | 87931.7  | 1.530 | 7.4 | 0.4 | 7.4  | 0.8 | 0.4 | 0.63 | 0.82599 | 2162.3 | 11.6 | 2156.4 | 6.8  | 2150.8 | 8  | -0.53 |
| Erin-RMA | 1148331 | 950938  | 52640.8  | 2.032 | 7.5 | 0.5 | 6.8  | 0.8 | 0.4 | 0.59 | 0.74411 | 2059.0 | 10.5 | 2087.7 | 7.1  | 2116.2 | 9  | 2.7   |
| Erin-RMA | 1426746 | 1181495 | 70412.6  | 1.205 | 5.0 | 0.5 | 14.7 | 0.8 | 0.5 | 0.62 | 0.76837 | 2789.3 | 14.1 | 2797.3 | 7.7  | 2803.0 | 8  | 0.49  |
| Erin-RMA | 1396371 | 1156341 | 470330.5 | 1.465 | 7.6 | 0.4 | 7.1  | 0.7 | 0.4 | 0.53 | 0.77472 | 2143.8 | 9.6  | 2126.3 | 6.1  | 2109.5 | 8  | -1.63 |
| Erin-RMA | 1551029 | 1284415 | 184698.3 | 1.174 | 5.5 | 0.5 | 12.4 | 0.8 | 0.5 | 0.55 | 0.72693 | 2622.2 | 11.9 | 2633.5 | 7.1  | 2642.2 | 9  | 0.76  |
| Erin-RMA | 764423  | 633022  | 82759.9  | 1.941 | 7.3 | 0.5 | 7.4  | 0.8 | 0.4 | 0.57 | 0.73773 | 2146.5 | 10.4 | 2159.2 | 6.9  | 2171.2 | 9  | 1.14  |
| Erin-RMA | 607838  | 503353  | 58014.1  | 2.567 | 7.4 | 0.8 | 7.3  | 1.1 | 0.4 | 0.73 | 0.69549 | 2135.2 | 13.3 | 2147.5 | 9.4  | 2159.2 | 13 | 1.11  |
| Erin-RMA | 1824298 | 1510710 | 133354.6 | 2.241 | 5.3 | 0.5 | 13.3 | 0.8 | 0.5 | 0.65 | 0.80590 | 2692.7 | 14.3 | 2698.4 | 7.6  | 2702.7 | 8  | 0.37  |
| Erin-RMA | 179909  | 148984  | 91982.0  | 0.994 | 7.3 | 1.1 | 7.6  | 1.3 | 0.4 | 0.61 | 0.48611 | 2201.9 | 11.4 | 2184.2 | 11.3 | 2167.6 | 19 | -1.59 |
| Erin-RMA | 940503  | 778835  | 36529.3  | 3.134 | 7.6 | 0.5 | 6.9  | 0.7 | 0.4 | 0.48 | 0.69535 | 2106.5 | 8.7  | 2098.7 | 6.2  | 2091.2 | 9  | -0.73 |
| Erin-RMA | 911405  | 754739  | #####    | 1.979 | 7.4 | 0.5 | 7.3  | 0.7 | 0.4 | 0.56 | 0.77255 | 2162.6 | 10.3 | 2152.3 | 6.5  | 2142.4 | 8  | -0.94 |
| Erin-RMA | 1590581 | 1317167 | 364804.0 | 2.056 | 8.5 | 0.6 | 5.5  | 0.9 | 0.3 | 0.69 | 0.76319 | 1892.9 | 11.3 | 1903.0 | 7.8  | 1914.1 | 10 | 1.11  |
| Erin-RMA | 698012  | 578027  | 59259.7  | 1.223 | 5.4 | 0.6 | 13.3 | 1.0 | 0.5 | 0.77 | 0.79211 | 2734.8 | 17.2 | 2700.9 | 9.2  | 2675.5 | 10 | -2.22 |
| Erin-RMA | 1640823 | 1358773 | 203812.0 | 2.378 | 5.3 | 0.5 | 13.4 | 0.8 | 0.5 | 0.66 | 0.80849 | 2709.3 | 14.7 | 2708.1 | 7.8  | 2707.2 | 8  | -0.08 |
| Erin-RMA | 1963237 | 1625766 | 51223.5  | 3.727 | 7.5 | 0.4 | 7.1  | 0.8 | 0.4 | 0.63 | 0.83382 | 2124.2 | 11.4 | 2125.5 | 6.7  | 2126.8 | 7  | 0.12  |
| Erin-RMA | 847534  | 701847  | 33342.6  | 2.616 | 7.2 | 0.4 | 7.9  | 0.7 | 0.4 | 0.58 | 0.81721 | 2238.2 | 10.9 | 2216.4 | 6.4  | 2196.4 | 7  | -1.9  |
| Erin-RMA | 439042  | 363572  | 84667.1  | 1.421 | 5.5 | 0.5 | 12.4 | 0.9 | 0.5 | 0.68 | 0.77869 | 2614.8 | 14.5 | 2638.5 | 8.2  | 2656.7 | 9  | 1.58  |
| Erin-RMA | 125594  | 104005  | 14348.8  | 0.646 | 6.7 | 0.9 | 8.7  | 1.3 | 0.4 | 0.98 | 0.74073 | 2301.5 | 19.0 | 2306.2 | 12.1 | 2310.3 | 15 | 0.38  |
| Erin-RMA | 545444  | 451685  | 24035.2  | 1.258 | 8.2 | 0.5 | 5.8  | 0.9 | 0.4 | 0.71 | 0.82429 | 1937.3 | 11.8 | 1945.2 | 7.4  | 1953.7 | 9  | 0.84  |
| Erin-RMA | 1588665 | 1315581 | 54130.2  | 1.805 | 7.2 | 0.5 | 7.7  | 0.8 | 0.4 | 0.64 | 0.79386 | 2198.1 | 11.8 | 2199.6 | 7.2  | 2201.1 | 8  | 0.14  |
| Erin-RMA | 515756  | 427100  | 25787.4  | 2.442 | 4.5 | 0.5 | 17.7 | 0.9 | 0.6 | 0.74 | 0.81810 | 2938.6 | 17.6 | 2971.2 | 8.7  | 2993.3 | 8  | 1.83  |
| Erin-RMA | 889793  | 736842  | 184678.2 | 3.715 | 7.5 | 0.4 | 7.4  | 0.7 | 0.4 | 0.52 | 0.79277 | 2199.8 | 9.8  | 2165.0 | 5.9  | 2132.2 | 7  | -3.17 |
| Erin-RMA | 1339097 | 1108912 | 77882.6  | 2.642 | 4.2 | 0.5 | 19.3 | 0.9 | 0.6 | 0.76 | 0.82694 | 3030.8 | 18.5 | 3058.2 | 8.9  | 3076.2 | 8  | 1.48  |
| Erin-RMA | 1098405 | 909594  | 217612.7 | 2.152 | 7.5 | 0.5 | 7.2  | 0.8 | 0.4 | 0.63 | 0.77763 | 2146.9 | 11.6 | 2138.5 | 7.3  | 2130.4 | 9  | -0.78 |
| Erin-RMA | 1210247 | 1002211 | 71122.4  | 1.806 | 8.2 | 0.5 | 6.0  | 0.7 | 0.4 | 0.53 | 0.75048 | 1964.8 | 9.0  | 1969.7 | 6.2  | 1974.8 | 8  | 0.51  |
| Erin-RMA | 1059284 | 877198  | 37764.5  | 1.905 | 8.2 | 0.5 | 6.0  | 0.8 | 0.4 | 0.65 | 0.78597 | 1989.7 | 11.1 | 1980.8 | 7.2  | 1971.5 | 9  | -0.92 |
| Erin-RMA | 826121  | 684115  | 48700.9  | 1.426 | 7.3 | 0.4 | 7.4  | 0.7 | 0.4 | 0.58 | 0.79683 | 2160.7 | 10.7 | 2165.3 | 6.5  | 2169.7 | 8  | 0.41  |
| Erin-RMA | 1737529 | 1438856 | 270127.6 | 2.350 | 5.3 | 0.4 | 13.3 | 0.7 | 0.5 | 0.61 | 0.82785 | 2691.8 | 13.3 | 2704.0 | 6.9  | 2713.1 | 7  | 0.79  |
| Erin-RMA | 1077769 | 892505  | 77111.5  | 3.682 | 6.1 | 0.4 | 10.6 | 0.7 | 0.5 | 0.50 | 0.76957 | 2477.0 | 10.3 | 2484.6 | 6.1  | 2490.8 | 7  | 0.55  |
| Erin-RMA | 294499  | 243876  | 43569.1  | 1.872 | 7.1 | 0.6 | 7.6  | 1.0 | 0.4 | 0.79 | 0.79663 | 2161.5 | 14.6 | 2189.1 | 9.0  | 2215.0 | 10 | 2.42  |
| Erin-RMA | 840328  | 695880  | 55229.0  | 2.505 | 7.5 | 0.5 | 7.2  | 1.0 | 0.4 | 0.91 | 0.89028 | 2153.0 | 16.6 | 2141.9 | 9.1  | 2131.2 | 8  | -1.02 |
| Erin-RMA | 1601248 | 1326001 | 66642.0  | 0.830 | 7.8 | 0.5 | 6.5  | 0.8 | 0.4 | 0.69 | 0.82204 | 2033.3 | 12.0 | 2042.2 | 7.4  | 2051.3 | 8  | 0.87  |
| Erin-RMA | 2162820 | 1791041 | 246182.2 | 2.239 | 5.3 | 0.4 | 13.4 | 0.7 | 0.5 | 0.52 | 0.76978 | 2696.0 | 11.5 | 2707.7 | 6.4  | 2716.5 | 7  | 0.76  |
| Erin-RMA | 1346170 | 1114770 | 205736.8 | 1.376 | 7.5 | 0.5 | 7.1  | 0.7 | 0.4 | 0.53 | 0.75456 | 2126.5 | 9.6  | 2122.5 | 6.3  | 2118.6 | 8  | -0.37 |
| Erin-RMA | 1575643 | 1304797 | 825521.8 | 2.151 | 7.4 | 0.4 | 7.3  | 0.7 | 0.4 | 0.54 | 0.80551 | 2137.5 | 9.9  | 2147.0 | 6.0  | 2156.2 | 7  | 0.87  |
| Erin-RMA | 751080  | 621973  | 256569.2 | 3.061 | 7.4 | 0.5 | 7.4  | 0.8 | 0.4 | 0.62 | 0.75199 | 2150.9 | 11.4 | 2156.0 | 7.4  | 2160.8 | 10 | 0.46  |
| Erin-RMA | 989142  | 819113  | #####    | 2.954 | 4.2 | 0.4 | 20.0 | 0.8 | 0.6 | 0.62 | 0.82157 | 3066.6 | 15.1 | 3092.5 | 7.3  | 3109.4 | 7  | 1.38  |
| Erin-RMA | 1330402 | 1101712 | 163883.1 | 0.900 | 7.8 | 0.5 | 6.5  | 0.8 | 0.4 | 0.64 | 0.81712 | 2026.4 | 11.2 | 2041.4 | 6.9  | 2056.7 | 8  | 1.47  |
| Erin-RMA | 912509  | 755653  | 131063.3 | 1.324 | 5.0 | 0.5 | 14.7 | 0.8 | 0.5 | 0.67 | 0.82200 | 2761.6 | 15.0 | 2793.9 | 7.7  | 2817.2 | 8  | 1.97  |
| Erin-RMA | 1163996 | 963911  | #####    | 2.065 | 8.6 | 0.5 | 5.4  | 0.8 | 0.3 | 0.60 | 0.78706 | 1878.3 | 9.7  | 1884.7 | 6.5  | 1891.7 | 8  | 0.71  |
| Erin-RMA | 872594  | 722599  | 57964.6  | 1.351 | 4.2 | 0.5 | 20.5 | 0.8 | 0.6 | 0.59 | 0.75305 | 3152.6 | 14.7 | 3113.5 | 7.6  | 3088.3 | 8  | -2.08 |
| Erin-RMA | 429145  | 355377  | 24778.4  | 1.770 | 7.3 | 0.6 | 7.4  | 0.8 | 0.4 | 0.50 | 0.64312 | 2142.0 | 9.0  | 2161.8 | 6.9  | 2180.7 | 10 | 1.77  |

|          |         |         |          |        |     |     |      |     |     |      |         |        |      |        |      |        |    |       |
|----------|---------|---------|----------|--------|-----|-----|------|-----|-----|------|---------|--------|------|--------|------|--------|----|-------|
| Erin-RMA | 296155  | 245247  | 12659.0  | 3.716  | 7.5 | 0.8 | 7.0  | 1.2 | 0.4 | 0.95 | 0.76953 | 2097.1 | 16.9 | 2111.3 | 10.9 | 2125.1 | 14 | 1.31  |
| Erin-RMA | 437038  | 361913  | 43671.5  | 1.677  | 7.3 | 0.6 | 7.5  | 1.0 | 0.4 | 0.75 | 0.76331 | 2187.5 | 14.0 | 2177.1 | 8.9  | 2167.2 | 11 | -0.94 |
| Erin-RMA | 975238  | 807599  | 164911.7 | 0.837  | 7.6 | 0.5 | 6.8  | 0.8 | 0.4 | 0.61 | 0.76354 | 2067.8 | 10.8 | 2089.5 | 7.1  | 2110.8 | 9  | 2.04  |
| Erin-RMA | 1066626 | 883278  | 51983.5  | 1.862  | 7.5 | 0.6 | 7.4  | 0.9 | 0.4 | 0.63 | 0.72244 | 2194.0 | 11.8 | 2157.8 | 7.9  | 2123.5 | 11 | -3.32 |
| Erin-RMA | 1009994 | 836380  | 743970.5 | 2.388  | 5.0 | 0.4 | 15.3 | 0.9 | 0.6 | 0.76 | 0.87897 | 2848.6 | 17.5 | 2835.6 | 8.3  | 2826.4 | 7  | -0.79 |
| Erin-RMA | 780959  | 646715  | 52434.7  | 2.457  | 7.6 | 0.5 | 7.0  | 0.8 | 0.4 | 0.71 | 0.83877 | 2132.0 | 12.9 | 2117.4 | 7.6  | 2103.2 | 8  | -1.37 |
| Erin-RMA | 534198  | 442372  | 58566.4  | 1.213  | 5.3 | 0.6 | 13.6 | 0.9 | 0.5 | 0.58 | 0.66655 | 2742.3 | 12.9 | 2723.2 | 8.2  | 2709.1 | 11 | -1.23 |
| Erin-RMA | 2233405 | 1849494 | 49273.5  | 1.516  | 7.2 | 0.4 | 7.7  | 0.7 | 0.4 | 0.48 | 0.73448 | 2203.9 | 9.0  | 2199.8 | 5.9  | 2195.9 | 8  | -0.37 |
| Erin-RMA | 236396  | 195760  | 8811.3   | 2.249  | 7.2 | 0.9 | 7.6  | 1.1 | 0.4 | 0.62 | 0.56904 | 2190.1 | 11.5 | 2181.3 | 9.8  | 2172.9 | 16 | -0.79 |
| Erin-RMA | 167224  | 138479  | 8978.5   | 19.694 | 7.4 | 0.9 | 6.8  | 1.3 | 0.4 | 0.86 | 0.64857 | 2040.3 | 15.0 | 2091.5 | 11.7 | 2142.3 | 18 | 4.76  |
| Erin-RMA | 1622703 | 1343768 | 260276.2 | 2.349  | 5.3 | 0.4 | 13.4 | 0.6 | 0.5 | 0.43 | 0.76835 | 2710.1 | 9.6  | 2705.8 | 5.3  | 2702.7 | 6  | -0.28 |
| Erin-RMA | 1591332 | 1317789 | 204753.9 | 1.676  | 7.6 | 0.4 | 6.9  | 0.7 | 0.4 | 0.54 | 0.82075 | 2108.1 | 9.8  | 2102.3 | 5.9  | 2096.7 | 7  | -0.54 |
| Erin-RMA | 1565443 | 1296351 | 104891.7 | 1.719  | 7.6 | 0.4 | 6.9  | 0.7 | 0.4 | 0.53 | 0.77046 | 2109.8 | 9.5  | 2102.1 | 6.1  | 2094.5 | 8  | -0.73 |
| Erin-RMA | 459803  | 380765  | 14621.6  | 2.025  | 7.0 | 0.7 | 8.0  | 0.9 | 0.4 | 0.62 | 0.69068 | 2249.4 | 11.8 | 2235.6 | 8.2  | 2223.0 | 11 | -1.19 |
| Erin-RMA | 1179650 | 976873  | 49760.9  | 1.376  | 7.6 | 0.4 | 6.9  | 0.7 | 0.4 | 0.54 | 0.78314 | 2109.5 | 9.8  | 2104.4 | 6.2  | 2099.3 | 8  | -0.49 |
| Erin-RMA | 1443647 | 1195491 | 588299.1 | 2.208  | 5.4 | 0.4 | 13.3 | 0.6 | 0.5 | 0.46 | 0.77309 | 2707.5 | 10.2 | 2701.7 | 5.6  | 2697.4 | 6  | -0.37 |
| Erin-RMA | 772454  | 639673  | 91036.7  | 1.721  | 5.0 | 0.4 | 14.9 | 0.8 | 0.5 | 0.68 | 0.85750 | 2812.8 | 15.6 | 2811.2 | 7.6  | 2810.1 | 7  | -0.09 |
| Erin-RMA | 2062375 | 1707863 | 198659.4 | 2.448  | 7.4 | 0.4 | 7.1  | 0.6 | 0.4 | 0.51 | 0.80105 | 2107.7 | 9.1  | 2122.6 | 5.6  | 2137.1 | 7  | 1.38  |
| Erin-RMA | 1478123 | 1224040 | 58808.0  | 2.015  | 8.4 | 0.4 | 5.7  | 0.7 | 0.4 | 0.50 | 0.75817 | 1948.5 | 8.3  | 1929.9 | 5.6  | 1909.9 | 8  | -2.02 |
| Erin-RMA | 733060  | 607050  | 29101.2  | 2.241  | 8.5 | 0.5 | 5.5  | 0.7 | 0.3 | 0.55 | 0.73506 | 1911.4 | 9.1  | 1899.5 | 6.4  | 1886.6 | 9  | -1.31 |
| Erin-RMA | 393807  | 326114  | 16440.2  | 1.447  | 7.5 | 0.6 | 6.9  | 0.9 | 0.4 | 0.69 | 0.74829 | 2071.7 | 12.2 | 2093.6 | 8.2  | 2115.2 | 11 | 2.05  |
| Erin-RMA | 265073  | 219509  | 21303.9  | 1.350  | 6.3 | 0.5 | 9.7  | 0.8 | 0.5 | 0.68 | 0.79983 | 2396.1 | 13.6 | 2404.9 | 7.8  | 2412.4 | 9  | 0.68  |
| Erin-RMA | 1261126 | 1044344 | 345004.1 | 1.926  | 5.4 | 0.5 | 13.0 | 0.8 | 0.5 | 0.64 | 0.78230 | 2661.4 | 13.9 | 2680.0 | 7.7  | 2694.1 | 8  | 1.21  |
| Erin-RMA | 657618  | 544577  | 330090.5 | 2.048  | 7.2 | 0.5 | 7.7  | 0.7 | 0.4 | 0.53 | 0.71086 | 2212.4 | 9.9  | 2198.7 | 6.7  | 2186.0 | 9  | -1.21 |
| Erin-RMA | 717088  | 593824  | 151679.6 | 1.329  | 7.3 | 0.5 | 7.5  | 0.7 | 0.4 | 0.50 | 0.71497 | 2176.3 | 9.2  | 2175.6 | 6.3  | 2174.9 | 9  | -0.06 |
| Erin-RMA | 1281992 | 1061624 | 49360.6  | 2.102  | 5.3 | 0.4 | 13.2 | 0.6 | 0.5 | 0.47 | 0.74936 | 2672.2 | 10.2 | 2690.8 | 5.9  | 2704.8 | 7  | 1.2   |
| Erin-RMA | 1836852 | 1521105 | 201783.5 | 2.265  | 5.3 | 0.3 | 13.5 | 0.6 | 0.5 | 0.54 | 0.83969 | 2715.6 | 11.9 | 2712.1 | 6.0  | 2709.4 | 6  | -0.23 |
| Erin-RMA | 2179267 | 1804661 | #####    | 3.079  | 5.8 | 0.5 | 11.2 | 0.7 | 0.5 | 0.50 | 0.72312 | 2525.1 | 10.5 | 2538.2 | 6.5  | 2548.6 | 8  | 0.92  |
| Erin-RMA | 426519  | 353202  | 28944.9  | 0.942  | 7.6 | 0.6 | 6.7  | 0.9 | 0.4 | 0.62 | 0.71344 | 2049.1 | 10.9 | 2066.7 | 7.7  | 2084.3 | 11 | 1.69  |
| Erin-RMA | 132341  | 109592  | 7865.6   | 2.301  | 3.5 | 0.8 | 27.9 | 1.0 | 0.7 | 0.64 | 0.63812 | 3481.6 | 17.2 | 3415.9 | 9.8  | 3377.5 | 12 | -3.08 |
| Erin-RMA | 1638883 | 1357167 | 798339.7 | 1.128  | 7.6 | 0.5 | 6.8  | 0.8 | 0.4 | 0.64 | 0.77202 | 2089.0 | 11.4 | 2091.2 | 7.3  | 2093.4 | 9  | 0.21  |
| Erin-RMA | 787119  | 651817  | 26719.0  | 2.561  | 7.5 | 0.6 | 7.2  | 0.8 | 0.4 | 0.60 | 0.71619 | 2150.5 | 11.0 | 2133.9 | 7.5  | 2118.0 | 10 | -1.54 |
| Erin-RMA | 1556600 | 1289028 | #####    | 1.930  | 7.3 | 0.5 | 7.5  | 0.7 | 0.4 | 0.55 | 0.76194 | 2166.3 | 10.2 | 2173.8 | 6.5  | 2180.8 | 8  | 0.67  |
| Erin-RMA | 848890  | 702970  | 22690.6  | 1.641  | 7.5 | 0.5 | 7.1  | 0.8 | 0.4 | 0.57 | 0.72728 | 2127.8 | 10.4 | 2126.7 | 7.0  | 2125.6 | 10 | -0.11 |
| Erin-RMA | 879741  | 728518  | #####    | 2.623  | 7.3 | 0.5 | 7.6  | 0.8 | 0.4 | 0.62 | 0.75385 | 2197.0 | 11.5 | 2186.3 | 7.3  | 2176.2 | 9  | -0.96 |
| Erin-RMA | 684573  | 566898  | 32784.2  | 1.272  | 7.2 | 0.6 | 7.8  | 0.9 | 0.4 | 0.67 | 0.75088 | 2220.3 | 12.5 | 2205.4 | 8.0  | 2191.5 | 10 | -1.31 |
| Erin-RMA | 1486636 | 1231090 | 51604.0  | 2.883  | 8.4 | 0.5 | 5.7  | 0.8 | 0.3 | 0.59 | 0.77634 | 1924.9 | 9.8  | 1925.4 | 6.6  | 1926.0 | 9  | 0.06  |
| Erin-RMA | 1625764 | 1346303 | 84546.8  | 2.603  | 5.4 | 1.1 | 13.3 | 1.7 | 0.5 | 1.27 | 0.74994 | 2719.4 | 28.2 | 2701.1 | 16.0 | 2687.5 | 19 | -1.19 |
| Erin-RMA | 982129  | 813306  | 88694.2  | 2.109  | 7.6 | 0.4 | 6.7  | 0.8 | 0.4 | 0.65 | 0.84704 | 2065.5 | 11.5 | 2076.6 | 6.8  | 2087.6 | 7  | 1.06  |
| Erin-RMA | 793710  | 657275  | 219683.2 | 1.949  | 7.5 | 0.5 | 7.1  | 0.9 | 0.4 | 0.70 | 0.79775 | 2134.5 | 12.6 | 2128.4 | 7.8  | 2122.4 | 9  | -0.57 |
| Erin-RMA | 2185552 | 1809866 | 947464.5 | 1.360  | 4.9 | 0.4 | 15.1 | 0.8 | 0.5 | 0.68 | 0.85464 | 2804.5 | 15.4 | 2818.8 | 7.5  | 2829.1 | 7  | 0.87  |
| Erin-RMA | 3034297 | 2512715 | 63134.9  | 2.109  | 7.3 | 0.4 | 7.4  | 0.7 | 0.4 | 0.55 | 0.84084 | 2150.4 | 10.1 | 2158.7 | 5.9  | 2166.6 | 6  | 0.74  |
| Erin-RMA | 1778226 | 1472557 | 477408.0 | 2.227  | 5.3 | 0.4 | 13.3 | 0.8 | 0.5 | 0.66 | 0.83406 | 2695.2 | 14.5 | 2698.1 | 7.4  | 2700.2 | 7  | 0.19  |

|          |         |         |          |       |     |     |      |     |     |      |         |        |      |        |      |        |    |       |
|----------|---------|---------|----------|-------|-----|-----|------|-----|-----|------|---------|--------|------|--------|------|--------|----|-------|
| Erin-RMA | 1132109 | 937505  | 39184.2  | 1.665 | 6.0 | 0.5 | 10.9 | 0.7 | 0.5 | 0.53 | 0.75344 | 2536.3 | 11.1 | 2515.7 | 6.5  | 2499.0 | 8  | -1.49 |
| Erin-RMA | 774041  | 640987  | 35580.9  | 2.894 | 7.2 | 0.5 | 7.7  | 0.8 | 0.4 | 0.63 | 0.77434 | 2197.5 | 11.8 | 2198.6 | 7.4  | 2199.5 | 9  | 0.09  |
| Erin-RMA | 917776  | 760014  | 43630.8  | 1.982 | 7.7 | 0.5 | 6.6  | 0.7 | 0.4 | 0.54 | 0.71982 | 2053.6 | 9.4  | 2056.7 | 6.6  | 2059.9 | 9  | 0.31  |
| Erin-RMA | 1044885 | 865274  | 31943.1  | 2.433 | 7.3 | 0.5 | 7.4  | 0.8 | 0.4 | 0.57 | 0.74478 | 2163.4 | 10.4 | 2157.3 | 6.8  | 2151.5 | 9  | -0.55 |
| Erin-RMA | 887351  | 734819  | 69247.0  | 2.101 | 7.5 | 0.6 | 7.1  | 0.9 | 0.4 | 0.69 | 0.76316 | 2137.4 | 12.6 | 2124.5 | 8.1  | 2112.0 | 10 | -1.2  |
| Erin-RMA | 2983976 | 2471045 | 161951.3 | 2.766 | 7.1 | 0.4 | 7.7  | 0.8 | 0.4 | 0.69 | 0.85992 | 2176.1 | 12.8 | 2197.6 | 7.2  | 2217.7 | 7  | 1.88  |
| Erin-RMA | 3601061 | 2982055 | 195825.4 | 3.900 | 7.1 | 0.5 | 7.8  | 0.8 | 0.4 | 0.60 | 0.78741 | 2189.9 | 11.1 | 2208.0 | 6.8  | 2224.8 | 8  | 1.57  |
| Erin-RMA | 552177  | 457260  | 15428.2  | 5.132 | 5.9 | 0.7 | 10.9 | 0.9 | 0.5 | 0.54 | 0.61299 | 2501.2 | 11.2 | 2511.9 | 8.2  | 2520.6 | 12 | 0.77  |
| Erin-RMA | 472228  | 391054  | 59013.6  | 1.972 | 7.2 | 0.6 | 7.9  | 0.8 | 0.4 | 0.59 | 0.71856 | 2236.8 | 11.2 | 2218.0 | 7.4  | 2200.7 | 10 | -1.64 |
| Erin-RMA | 362417  | 300119  | 276210.1 | 2.135 | 7.4 | 0.5 | 7.1  | 0.7 | 0.4 | 0.51 | 0.69799 | 2097.2 | 9.2  | 2124.5 | 6.6  | 2150.9 | 9  | 2.5   |
| Erin-RMA | 1625788 | 1346323 | 381380.0 | 2.594 | 7.4 | 0.6 | 7.1  | 0.9 | 0.4 | 0.65 | 0.75325 | 2121.9 | 11.8 | 2128.5 | 7.7  | 2135.0 | 10 | 0.61  |
| Erin-RMA | 1304047 | 1079887 | 260203.6 | 2.324 | 5.4 | 0.5 | 13.4 | 0.7 | 0.5 | 0.54 | 0.75666 | 2738.1 | 12.1 | 2710.8 | 6.8  | 2690.4 | 8  | -1.77 |
| Erin-RMA | 1840390 | 1524036 | 87784.8  | 3.187 | 7.6 | 0.5 | 6.9  | 0.7 | 0.4 | 0.48 | 0.71007 | 2098.3 | 8.5  | 2099.2 | 5.9  | 2100.1 | 8  | 0.09  |
| Erin-RMA | 1794036 | 1485650 | 68169.1  | 1.235 | 8.1 | 0.5 | 6.0  | 0.8 | 0.4 | 0.71 | 0.83776 | 1967.7 | 12.1 | 1971.3 | 7.4  | 1975.2 | 8  | 0.38  |
| Erin-RMA | 1740129 | 1441009 | 65103.1  | 2.522 | 5.3 | 0.4 | 13.3 | 0.7 | 0.5 | 0.60 | 0.80438 | 2714.5 | 13.3 | 2704.1 | 7.1  | 2696.4 | 7  | -0.67 |
| Erin-RMA | 1357758 | 1124365 | 50373.7  | 1.033 | 7.9 | 0.4 | 6.6  | 0.8 | 0.4 | 0.67 | 0.84009 | 2069.8 | 11.9 | 2053.8 | 7.0  | 2037.8 | 8  | -1.57 |
| Erin-RMA | 1247520 | 1033077 | 80820.6  | 2.117 | 5.4 | 0.4 | 13.4 | 0.7 | 0.5 | 0.57 | 0.80106 | 2739.6 | 12.6 | 2708.9 | 6.7  | 2686.0 | 7  | -2    |
| Erin-RMA | 1196189 | 990570  | 27327.2  | 2.450 | 8.5 | 0.5 | 5.2  | 0.8 | 0.3 | 0.62 | 0.76544 | 1826.6 | 9.8  | 1857.6 | 6.9  | 1892.6 | 9  | 3.49  |
| Erin-RMA | 1643418 | 1360922 | 162757.3 | 2.143 | 5.3 | 0.4 | 13.2 | 0.7 | 0.5 | 0.59 | 0.79923 | 2679.3 | 13.0 | 2694.9 | 7.0  | 2706.6 | 7  | 1.01  |
| Erin-RMA | 1534830 | 1271000 | 503857.2 | 2.184 | 5.4 | 0.5 | 13.2 | 0.8 | 0.5 | 0.61 | 0.75264 | 2684.6 | 13.4 | 2691.3 | 7.6  | 2696.4 | 9  | 0.44  |
| Erin-RMA | 1409323 | 1167067 | 120895.8 | 0.928 | 7.3 | 0.5 | 7.6  | 0.8 | 0.4 | 0.59 | 0.77410 | 2184.3 | 10.9 | 2182.6 | 6.8  | 2181.0 | 8  | -0.15 |
| Erin-RMA | 1031521 | 854207  | 51729.1  | 1.923 | 7.2 | 0.6 | 7.8  | 0.8 | 0.4 | 0.63 | 0.73915 | 2218.8 | 11.8 | 2209.5 | 7.6  | 2200.9 | 10 | -0.81 |
| Erin-RMA | 1567763 | 1298272 | 68400.3  | 3.143 | 7.3 | 0.4 | 7.5  | 0.6 | 0.4 | 0.48 | 0.74404 | 2165.2 | 8.9  | 2169.9 | 5.8  | 2174.4 | 8  | 0.42  |
| Erin-RMA | 924797  | 765829  | 369445.4 | 2.084 | 7.4 | 0.5 | 7.4  | 0.7 | 0.4 | 0.45 | 0.63360 | 2155.0 | 8.2  | 2156.7 | 6.3  | 2158.4 | 10 | 0.16  |
| Erin-RMA | 2025282 | 1677146 | 75065.5  | 2.089 | 5.3 | 0.4 | 13.1 | 0.6 | 0.5 | 0.46 | 0.77980 | 2665.6 | 10.1 | 2688.1 | 5.6  | 2705.0 | 6  | 1.46  |
| Erin-RMA | 787519  | 652148  | 26213.0  | 0.483 | 8.1 | 0.5 | 6.0  | 0.8 | 0.4 | 0.68 | 0.80470 | 1963.2 | 11.4 | 1975.4 | 7.3  | 1988.1 | 9  | 1.25  |
| Erin-RMA | 860031  | 712195  | #####    | 1.930 | 7.2 | 0.5 | 7.6  | 0.9 | 0.4 | 0.76 | 0.85197 | 2179.6 | 14.0 | 2186.2 | 8.0  | 2192.3 | 8  | 0.58  |
| Erin-RMA | 1759161 | 1456769 | 56827.2  | 2.323 | 5.3 | 0.3 | 13.1 | 0.6 | 0.5 | 0.52 | 0.83803 | 2678.5 | 11.4 | 2690.4 | 5.9  | 2699.3 | 6  | 0.77  |
| Erin-RMA | 1277637 | 1058017 | 69798.3  | 2.159 | 7.2 | 0.6 | 7.7  | 0.9 | 0.4 | 0.64 | 0.75050 | 2186.1 | 11.8 | 2195.5 | 7.7  | 2204.1 | 10 | 0.82  |
| Erin-RMA | 1012379 | 838356  | 285343.7 | 2.022 | 7.2 | 0.4 | 7.7  | 0.7 | 0.4 | 0.60 | 0.81031 | 2185.3 | 11.1 | 2194.7 | 6.7  | 2203.5 | 8  | 0.82  |
| Erin-RMA | 664695  | 550437  | 73385.3  | 2.118 | 7.6 | 0.6 | 6.9  | 0.9 | 0.4 | 0.60 | 0.69089 | 2096.5 | 10.7 | 2098.3 | 7.7  | 2100.1 | 11 | 0.17  |
| Erin-RMA | 1039985 | 861217  | 70473.5  | 1.993 | 6.7 | 0.5 | 8.5  | 0.8 | 0.4 | 0.61 | 0.80209 | 2256.5 | 11.6 | 2283.7 | 6.9  | 2308.1 | 8  | 2.23  |
| Erin-RMA | 1758655 | 1456351 | 112128.2 | 1.818 | 5.4 | 0.4 | 13.2 | 0.7 | 0.5 | 0.58 | 0.80634 | 2685.5 | 12.7 | 2692.1 | 6.8  | 2697.0 | 7  | 0.43  |
| Erin-RMA | 731857  | 606054  | 31093.7  | 1.105 | 7.4 | 0.5 | 7.3  | 0.8 | 0.4 | 0.62 | 0.80709 | 2148.7 | 11.4 | 2147.5 | 6.9  | 2146.3 | 8  | -0.11 |
| Erin-RMA | 1346840 | 1115324 | 612479.6 | 2.856 | 7.6 | 0.5 | 6.9  | 0.7 | 0.4 | 0.56 | 0.76055 | 2090.3 | 10.0 | 2099.5 | 6.5  | 2108.6 | 8  | 0.86  |
| Erin-RMA | 1808773 | 1497853 | 218562.9 | 1.975 | 7.6 | 0.5 | 7.0  | 0.8 | 0.4 | 0.63 | 0.79136 | 2118.8 | 11.4 | 2111.0 | 7.1  | 2103.5 | 9  | -0.73 |
| Erin-RMA | 281057  | 232744  | 37202.9  | 1.437 | 6.8 | 0.6 | 8.3  | 1.0 | 0.4 | 0.81 | 0.80703 | 2242.3 | 15.2 | 2264.1 | 9.0  | 2283.8 | 10 | 1.82  |
| Erin-RMA | 1506266 | 1247346 | 126742.2 | 2.208 | 5.4 | 1.1 | 12.9 | 1.7 | 0.5 | 1.30 | 0.77185 | 2672.7 | 28.5 | 2676.0 | 15.9 | 2678.5 | 18 | 0.21  |
| Erin-RMA | 666007  | 551524  | 51921.4  | 0.982 | 5.5 | 0.4 | 12.7 | 0.8 | 0.5 | 0.70 | 0.85042 | 2670.7 | 15.3 | 2656.6 | 7.7  | 2645.8 | 7  | -0.94 |
| Erin-RMA | 485207  | 401802  | 50299.7  | 1.183 | 7.2 | 0.5 | 7.7  | 2.3 | 0.4 | 2.25 | 0.97390 | 2182.1 | 41.6 | 2191.1 | 20.7 | 2199.4 | 9  | 0.79  |
| Erin-RMA | 648175  | 536757  | #####    | 1.737 | 7.4 | 0.5 | 7.3  | 0.8 | 0.4 | 0.63 | 0.77352 | 2155.6 | 11.5 | 2150.7 | 7.2  | 2146.0 | 9  | -0.45 |
| Erin-RMA | 2231852 | 1848207 | 133886.7 | 1.253 | 8.5 | 0.5 | 5.5  | 0.8 | 0.3 | 0.66 | 0.80903 | 1907.5 | 10.9 | 1901.4 | 7.0  | 1894.7 | 9  | -0.68 |
| Erin-RMA | 1189886 | 985350  | 116640.5 | 1.227 | 8.2 | 0.4 | 6.1  | 0.7 | 0.4 | 0.62 | 0.85096 | 2006.9 | 10.8 | 1989.2 | 6.4  | 1970.8 | 7  | -1.83 |

|          |         |         |          |       |      |     |      |     |     |      |         |        |      |        |     |        |    |       |
|----------|---------|---------|----------|-------|------|-----|------|-----|-----|------|---------|--------|------|--------|-----|--------|----|-------|
| Erin-RMA | 920698  | 762435  | 37330.0  | 1.360 | 7.1  | 0.5 | 7.9  | 0.8 | 0.4 | 0.61 | 0.75420 | 2230.7 | 11.4 | 2218.9 | 7.3 | 2208.0 | 9  | -1.02 |
| Erin-RMA | 832620  | 689497  | 23490.2  | 2.723 | 7.3  | 0.5 | 7.5  | 0.8 | 0.4 | 0.58 | 0.73537 | 2187.7 | 10.7 | 2173.3 | 7.0 | 2159.8 | 9  | -1.29 |
| Erin-RMA | 1281536 | 1061246 | 67778.2  | 2.966 | 7.4  | 0.5 | 7.2  | 0.8 | 0.4 | 0.56 | 0.74093 | 2131.8 | 10.2 | 2138.1 | 6.7 | 2144.2 | 9  | 0.58  |
| Erin-RMA | 301721  | 249857  | 11413.9  | 1.170 | 7.5  | 0.7 | 7.2  | 0.9 | 0.4 | 0.57 | 0.62405 | 2158.7 | 10.4 | 2139.2 | 8.1 | 2120.5 | 12 | -1.8  |
| Erin-RMA | 3051359 | 2526845 | 110943.4 | 1.137 | 4.8  | 0.4 | 15.7 | 0.7 | 0.5 | 0.52 | 0.78736 | 2818.8 | 11.9 | 2857.1 | 6.3 | 2884.1 | 7  | 2.27  |
| Erin-RMA | 1791199 | 1483300 | 100202.0 | 1.643 | 5.3  | 0.4 | 13.4 | 0.8 | 0.5 | 0.66 | 0.84586 | 2695.2 | 14.5 | 2710.9 | 7.4 | 2722.7 | 7  | 1.01  |
| Erin-RMA | 760135  | 629471  | 74484.8  | 1.818 | 7.3  | 0.5 | 7.5  | 0.7 | 0.4 | 0.51 | 0.69633 | 2171.1 | 9.4  | 2169.4 | 6.5 | 2167.8 | 9  | -0.15 |
| Erin-RMA | 638346  | 528617  | 37656.6  | 1.313 | 7.5  | 0.7 | 6.9  | 0.9 | 0.4 | 0.61 | 0.66866 | 2090.0 | 10.9 | 2103.7 | 8.1 | 2117.1 | 12 | 1.28  |
| Erin-RMA | 974776  | 807217  | 182297.7 | 3.498 | 7.5  | 0.4 | 7.2  | 0.9 | 0.4 | 0.75 | 0.86002 | 2141.5 | 13.7 | 2138.6 | 7.8 | 2135.8 | 8  | -0.27 |
| Erin-RMA | 3763567 | 3116627 | 474725.7 | 2.708 | 7.7  | 0.4 | 6.6  | 0.6 | 0.4 | 0.52 | 0.82370 | 2044.8 | 9.2  | 2064.1 | 5.6 | 2083.4 | 6  | 1.86  |
| Erin-RMA | 538781  | 446167  | 54045.4  | 1.974 | 7.6  | 0.5 | 7.0  | 0.9 | 0.4 | 0.71 | 0.81105 | 2105.7 | 12.8 | 2107.1 | 7.8 | 2108.4 | 9  | 0.13  |
| Erin-RMA | 1012609 | 838546  | 34463.0  | 2.506 | 5.4  | 0.5 | 13.1 | 0.7 | 0.5 | 0.55 | 0.73730 | 2671.7 | 12.0 | 2684.0 | 7.0 | 2693.3 | 8  | 0.8   |
| Erin-RMA | 978190  | 810044  | 57571.1  | 2.235 | 5.3  | 0.4 | 13.0 | 0.7 | 0.5 | 0.59 | 0.82615 | 2649.8 | 12.8 | 2679.6 | 6.7 | 2702.2 | 7  | 1.94  |
| Erin-RMA | 1460360 | 1209331 | #####    | 1.858 | 3.7  | 0.4 | 24.3 | 0.7 | 0.7 | 0.52 | 0.78122 | 3239.8 | 13.3 | 3279.1 | 6.5 | 3303.2 | 7  | 1.92  |
| Erin-RMA | 773275  | 640353  | 21915.6  | 2.705 | 7.5  | 0.5 | 7.3  | 0.9 | 0.4 | 0.66 | 0.77175 | 2173.2 | 12.1 | 2144.7 | 7.6 | 2117.6 | 9  | -2.62 |
| Erin-RMA | 1380144 | 1142903 | 49707.4  | 1.565 | 7.6  | 0.4 | 6.9  | 0.7 | 0.4 | 0.56 | 0.80531 | 2079.0 | 9.9  | 2095.6 | 6.1 | 2111.9 | 7  | 1.56  |
| Erin-RMA | 1577567 | 1306391 | 542298.7 | 2.502 | 5.3  | 0.5 | 13.2 | 0.9 | 0.5 | 0.68 | 0.78922 | 2677.9 | 15.0 | 2691.4 | 8.2 | 2701.6 | 9  | 0.88  |
| Erin-RMA | 640100  | 530070  | 49000.8  | 1.018 | 5.0  | 0.5 | 14.9 | 0.8 | 0.5 | 0.65 | 0.80948 | 2807.4 | 14.8 | 2810.3 | 7.7 | 2812.4 | 8  | 0.18  |
| Erin-RMA | 1574453 | 1303812 | 135612.4 | 2.645 | 7.4  | 0.4 | 7.2  | 0.8 | 0.4 | 0.65 | 0.83101 | 2125.8 | 11.7 | 2133.8 | 6.9 | 2141.5 | 8  | 0.73  |
| Erin-RMA | 2412629 | 1997910 | 93602.5  | 2.352 | 5.3  | 0.5 | 13.2 | 0.7 | 0.5 | 0.49 | 0.69081 | 2664.4 | 10.6 | 2691.6 | 6.6 | 2712.1 | 8  | 1.76  |
| Erin-RMA | 903206  | 747949  | 31971.5  | 2.032 | 6.7  | 0.5 | 8.7  | 0.8 | 0.4 | 0.57 | 0.75078 | 2303.5 | 10.9 | 2305.0 | 6.9 | 2306.4 | 9  | 0.13  |
| Erin-RMA | 1415649 | 1172306 | 398094.6 | 2.093 | 5.7  | 0.4 | 11.5 | 0.7 | 0.5 | 0.62 | 0.83620 | 2546.4 | 12.9 | 2566.3 | 6.9 | 2582.0 | 7  | 1.38  |
| Erin-RMA | 728412  | 603201  | 22481.1  | 0.850 | 7.6  | 0.4 | 6.8  | 0.7 | 0.4 | 0.60 | 0.80358 | 2081.9 | 10.7 | 2084.8 | 6.6 | 2087.5 | 8  | 0.27  |
| Erin-RMA | 1347759 | 1116086 | 64316.6  | 2.215 | 5.4  | 0.3 | 13.2 | 0.5 | 0.5 | 0.43 | 0.83221 | 2686.6 | 9.5  | 2693.0 | 4.9 | 2697.7 | 5  | 0.41  |
| Erin-RMA | 1493598 | 1236855 | 59473.3  | 1.779 | 8.1  | 0.6 | 6.1  | 0.8 | 0.4 | 0.53 | 0.68165 | 1990.1 | 9.0  | 1986.7 | 6.8 | 1983.2 | 10 | -0.35 |
| Erin-RMA | 2509812 | 2078387 | 165161.9 | 1.295 | 7.6  | 0.4 | 7.0  | 0.7 | 0.4 | 0.53 | 0.79400 | 2110.3 | 9.5  | 2111.6 | 5.9 | 2112.9 | 7  | 0.12  |
| Erin-RMA | 426419  | 353120  | 42773.8  | 2.116 | 5.4  | 0.6 | 13.3 | 0.9 | 0.5 | 0.66 | 0.76390 | 2704.0 | 14.5 | 2700.5 | 8.1 | 2697.8 | 9  | -0.23 |
| Erin-RMA | 2184378 | 1808894 | 82101.2  | 1.631 | 7.5  | 0.4 | 7.0  | 0.8 | 0.4 | 0.64 | 0.82268 | 2107.4 | 11.6 | 2112.1 | 7.0 | 2116.7 | 8  | 0.44  |
| Erin-RMA | 1843990 | 1527017 | 134362.7 | 2.292 | 5.3  | 0.4 | 13.1 | 0.6 | 0.5 | 0.45 | 0.72764 | 2651.3 | 9.7  | 2684.5 | 5.8 | 2709.6 | 7  | 2.15  |
| Erin-RMA | 1189476 | 985010  | 67113.1  | 2.748 | 4.2  | 0.5 | 19.0 | 0.8 | 0.6 | 0.58 | 0.76414 | 2967.1 | 13.8 | 3041.0 | 7.3 | 3090.2 | 8  | 3.98  |
| Erin-RMA | 649260  | 537655  | 60795.4  | 2.121 | 6.9  | 0.5 | 8.1  | 0.7 | 0.4 | 0.57 | 0.76298 | 2219.0 | 10.7 | 2240.8 | 6.8 | 2260.7 | 8  | 1.85  |
| Erin-RMA | 1302276 | 1078421 | 193770.0 | 2.900 | 4.8  | 0.5 | 15.9 | 1.0 | 0.6 | 0.83 | 0.87303 | 2870.6 | 19.3 | 2869.3 | 9.1 | 2868.4 | 8  | -0.08 |
| Erin-RMA | 424908  | 351868  | 9583.8   | 1.220 | 15.0 | 1.4 | 0.9  | 1.9 | 0.1 | 0.53 | 0.28665 | 626.3  | 3.2  | 655.5  | 9.0 | 757.1  | 38 | 17.3  |
| Erin-RMA | 792443  | 656225  | 48494.4  | 2.722 | 7.2  | 0.7 | 7.8  | 0.9 | 0.4 | 0.66 | 0.70856 | 2206.8 | 12.2 | 2204.6 | 8.3 | 2202.6 | 11 | -0.19 |
| Erin-RMA | 1442349 | 1194416 | 144387.2 | 1.484 | 7.2  | 0.5 | 7.7  | 0.8 | 0.4 | 0.56 | 0.71691 | 2179.1 | 10.3 | 2192.2 | 7.0 | 2204.4 | 9  | 1.15  |
| Erin-RMA | 413602  | 342506  | 160644.7 | 1.671 | 7.3  | 0.6 | 7.6  | 0.8 | 0.4 | 0.57 | 0.71442 | 2183.0 | 10.5 | 2180.3 | 7.1 | 2177.8 | 10 | -0.24 |
| Erin-RMA | 2126779 | 1761195 | 188886.4 | 1.963 | 5.3  | 0.4 | 13.1 | 0.8 | 0.5 | 0.69 | 0.83735 | 2657.2 | 14.9 | 2688.1 | 7.7 | 2711.4 | 7  | 2     |
| Erin-RMA | 1361022 | 1127068 | 203005.3 | 2.190 | 5.2  | 0.4 | 13.6 | 0.7 | 0.5 | 0.57 | 0.80938 | 2689.5 | 12.5 | 2720.2 | 6.6 | 2743.0 | 7  | 1.95  |
| Erin-RMA | 1404083 | 1162727 | 95981.7  | 1.735 | 5.3  | 0.5 | 13.4 | 0.8 | 0.5 | 0.64 | 0.79215 | 2706.5 | 14.2 | 2707.2 | 7.7 | 2707.8 | 8  | 0.05  |
| Erin-RMA | 748959  | 620216  | 610132.8 | 1.892 | 7.5  | 0.6 | 7.1  | 0.8 | 0.4 | 0.52 | 0.68379 | 2124.3 | 9.4  | 2122.8 | 6.8 | 2121.4 | 10 | -0.14 |
| Erin-RMA | 650420  | 538616  | 25547.0  | 2.352 | 7.5  | 0.5 | 7.0  | 0.9 | 0.4 | 0.67 | 0.76990 | 2117.6 | 12.0 | 2116.6 | 7.7 | 2115.7 | 10 | -0.09 |
| Erin-RMA | 1082268 | 896231  | 210613.6 | 1.409 | 7.6  | 0.5 | 7.2  | 0.7 | 0.4 | 0.46 | 0.64503 | 2160.6 | 8.5  | 2133.8 | 6.4 | 2108.1 | 10 | -2.49 |
| Erin-RMA | 2203290 | 1824555 | 48795.4  | 1.817 | 8.5  | 0.5 | 5.5  | 0.9 | 0.3 | 0.71 | 0.79297 | 1889.1 | 11.6 | 1898.7 | 7.7 | 1909.2 | 10 | 1.05  |

|                    |         |          |       |     |     |      |     |     |      |         |        |      |        |      |        |    |       |
|--------------------|---------|----------|-------|-----|-----|------|-----|-----|------|---------|--------|------|--------|------|--------|----|-------|
| Erin-RMA : 1221847 | 1011818 | 139086.5 | 1.399 | 4.3 | 0.5 | 19.0 | 0.8 | 0.6 | 0.65 | 0.80850 | 3044.6 | 15.7 | 3041.4 | 7.7  | 3039.3 | 8  | -0.18 |
| Erin-RMA : 366352  | 303378  | 121717.7 | 0.560 | 7.6 | 0.7 | 7.0  | 1.0 | 0.4 | 0.63 | 0.66377 | 2116.2 | 11.4 | 2112.1 | 8.5  | 2108.1 | 13 | -0.38 |
| Erin-RMA : 1359807 | 1126063 | 46327.6  | 3.243 | 7.4 | 0.5 | 7.3  | 0.7 | 0.4 | 0.53 | 0.70754 | 2137.5 | 9.6  | 2143.3 | 6.6  | 2148.9 | 9  | 0.53  |
| Erin-RMA : 705563  | 584280  | 36382.2  | 2.424 | 7.4 | 0.6 | 7.3  | 0.9 | 0.4 | 0.66 | 0.71954 | 2152.5 | 12.1 | 2144.5 | 8.2  | 2136.9 | 11 | -0.73 |
| Erin-RMA : 754060  | 624441  | 69444.3  | 2.022 | 7.2 | 0.6 | 7.8  | 0.9 | 0.4 | 0.70 | 0.76788 | 2232.8 | 13.2 | 2208.6 | 8.2  | 2186.2 | 10 | -2.13 |
| Erin-RMA : 1956410 | 1620113 | 46530.6  | 1.064 | 8.0 | 0.5 | 6.1  | 0.8 | 0.4 | 0.63 | 0.80250 | 1982.0 | 10.7 | 1992.7 | 6.8  | 2003.7 | 8  | 1.08  |
| Erin-RMA : 1371382 | 1135648 | 88364.7  | 2.628 | 5.3 | 0.4 | 13.2 | 0.6 | 0.5 | 0.52 | 0.80943 | 2670.5 | 11.3 | 2692.3 | 6.0  | 2708.6 | 6  | 1.41  |
| Erin-RMA : 1031365 | 854078  | 55906.1  | 0.775 | 7.6 | 0.4 | 7.0  | 0.7 | 0.4 | 0.53 | 0.81178 | 2109.8 | 9.6  | 2109.4 | 5.8  | 2109.0 | 7  | -0.04 |
| Erin-RMA : 543500  | 450075  | 57955.1  | 1.389 | 7.5 | 0.6 | 7.1  | 0.9 | 0.4 | 0.71 | 0.76170 | 2130.6 | 12.8 | 2124.1 | 8.3  | 2117.9 | 11 | -0.6  |
| Erin-RMA : 2669896 | 2210953 | 71375.1  | 1.360 | 5.6 | 0.4 | 12.2 | 0.7 | 0.5 | 0.54 | 0.77833 | 2616.6 | 11.6 | 2622.0 | 6.5  | 2626.2 | 7  | 0.37  |
| Erin-RMA : 1825965 | 1512090 | 134334.9 | 1.750 | 7.7 | 0.5 | 6.8  | 0.8 | 0.4 | 0.66 | 0.78998 | 2078.6 | 11.8 | 2082.6 | 7.4  | 2086.6 | 9  | 0.38  |
| Erin-RMA : 676809  | 560469  | 50692.1  | 2.194 | 4.4 | 0.5 | 18.3 | 0.8 | 0.6 | 0.67 | 0.82527 | 3006.6 | 16.1 | 3004.5 | 7.8  | 3003.1 | 7  | -0.12 |
| Erin-RMA : 1024305 | 848232  | 57030.8  | 2.206 | 5.4 | 0.5 | 13.5 | 0.7 | 0.5 | 0.53 | 0.71733 | 2746.3 | 11.9 | 2717.1 | 7.0  | 2695.5 | 9  | -1.88 |
| Erin-RMA : 621033  | 514280  | 73192.6  | 2.388 | 7.1 | 0.6 | 7.8  | 0.9 | 0.4 | 0.69 | 0.74619 | 2187.6 | 12.8 | 2208.4 | 8.3  | 2227.7 | 11 | 1.8   |
| Erin-RMA : 453830  | 375819  | 29464.6  | 1.708 | 5.4 | 0.6 | 13.3 | 0.8 | 0.5 | 0.58 | 0.71430 | 2703.3 | 12.8 | 2698.0 | 7.7  | 2694.0 | 9  | -0.34 |
| Erin-RMA : 1746744 | 1446487 | 124670.1 | 2.183 | 8.5 | 0.5 | 5.6  | 0.7 | 0.3 | 0.51 | 0.73008 | 1933.1 | 8.5  | 1922.4 | 6.0  | 1910.8 | 9  | -1.17 |
| Erin-RMA : 1430237 | 1184386 | 68827.1  | 1.073 | 7.2 | 0.4 | 7.9  | 0.7 | 0.4 | 0.60 | 0.82584 | 2233.4 | 11.3 | 2220.6 | 6.5  | 2208.8 | 7  | -1.11 |
| Erin-RMA : 3707967 | 3070585 | 186053.2 | 2.486 | 7.7 | 0.4 | 6.6  | 0.7 | 0.4 | 0.63 | 0.86511 | 2047.4 | 11.0 | 2061.2 | 6.4  | 2075.0 | 6  | 1.33  |
| Erin-RMA : 2032214 | 1682886 | 60240.7  | 2.602 | 8.5 | 0.4 | 5.5  | 0.7 | 0.3 | 0.56 | 0.80787 | 1912.5 | 9.2  | 1907.0 | 5.9  | 1901.0 | 7  | -0.6  |
| Erin-RMA : 1866326 | 1545513 | 571959.9 | 2.321 | 5.3 | 0.5 | 13.2 | 0.8 | 0.5 | 0.54 | 0.69862 | 2671.3 | 11.7 | 2693.8 | 7.2  | 2710.7 | 9  | 1.45  |
| Erin-RMA : 1156094 | 957367  | 51551.8  | 1.481 | 7.3 | 0.5 | 7.5  | 0.9 | 0.4 | 0.67 | 0.77258 | 2169.2 | 12.3 | 2171.4 | 7.8  | 2173.5 | 10 | 0.2   |
| Erin-RMA : 1079743 | 894140  | 427634.4 | 2.166 | 7.5 | 0.6 | 7.2  | 0.9 | 0.4 | 0.64 | 0.72914 | 2145.0 | 11.7 | 2135.3 | 7.8  | 2126.0 | 11 | -0.89 |
| Erin-RMA : 1623206 | 1344184 | 125958.0 | 1.268 | 6.1 | 0.5 | 10.3 | 0.8 | 0.5 | 0.68 | 0.80770 | 2451.4 | 13.9 | 2462.0 | 7.8  | 2470.8 | 8  | 0.79  |
| Erin-RMA : 1001856 | 829642  | 108856.1 | 3.190 | 7.3 | 0.6 | 7.7  | 0.9 | 0.4 | 0.71 | 0.78955 | 2204.2 | 13.2 | 2191.5 | 8.1  | 2179.5 | 10 | -1.13 |
| Erin-RMA : 481530  | 398757  | 79410.9  | 3.106 | 7.3 | 0.6 | 7.6  | 0.8 | 0.4 | 0.55 | 0.69600 | 2185.7 | 10.2 | 2179.2 | 7.1  | 2173.1 | 10 | -0.58 |
| Erin-RMA : 445626  | 369025  | 93640.8  | 1.577 | 7.4 | 0.7 | 7.6  | 1.1 | 0.4 | 0.88 | 0.76864 | 2213.2 | 16.5 | 2183.7 | 10.3 | 2156.1 | 13 | -2.65 |
| Erin-RMA : 1182382 | 979136  | 32949.8  | 2.116 | 7.4 | 0.5 | 7.3  | 0.8 | 0.4 | 0.60 | 0.74016 | 2147.4 | 10.9 | 2148.6 | 7.2  | 2149.7 | 9  | 0.1   |
| Erin-RMA : 1226218 | 1015437 | 56467.2  | 2.799 | 7.5 | 0.4 | 7.2  | 0.8 | 0.4 | 0.68 | 0.84688 | 2157.0 | 12.5 | 2138.8 | 7.2  | 2121.3 | 7  | -1.68 |
| Erin-RMA : 1596433 | 1322014 | #####    | 2.211 | 5.3 | 0.4 | 13.5 | 0.8 | 0.5 | 0.68 | 0.85333 | 2718.0 | 15.0 | 2713.0 | 7.5  | 2709.3 | 7  | -0.32 |
| Erin-RMA : 2537231 | 2101093 | 111259.3 | 3.174 | 7.6 | 0.4 | 6.8  | 0.6 | 0.4 | 0.48 | 0.77557 | 2084.5 | 8.6  | 2091.0 | 5.5  | 2097.3 | 7  | 0.61  |
| Erin-RMA : 2281283 | 1889141 | 213437.5 | 2.517 | 7.5 | 0.5 | 7.1  | 0.8 | 0.4 | 0.60 | 0.79750 | 2114.2 | 10.9 | 2118.3 | 6.7  | 2122.3 | 8  | 0.38  |
| Erin-RMA : 955165  | 790977  | #####    | 1.068 | 5.5 | 0.4 | 12.7 | 0.7 | 0.5 | 0.59 | 0.80498 | 2655.1 | 12.8 | 2654.0 | 6.9  | 2653.2 | 7  | -0.07 |
| Erin-RMA : 987788  | 817992  | 48649.7  | 1.967 | 7.6 | 0.5 | 6.9  | 0.8 | 0.4 | 0.68 | 0.81617 | 2107.2 | 12.1 | 2104.5 | 7.3  | 2101.7 | 8  | -0.26 |
| Erin-RMA : 914628  | 757407  | 77907.4  | 1.671 | 5.3 | 0.4 | 13.4 | 0.7 | 0.5 | 0.59 | 0.83789 | 2711.0 | 13.1 | 2708.7 | 6.7  | 2707.0 | 6  | -0.15 |
| Erin-RMA : 472777  | 391509  | 222843.8 | 2.105 | 5.3 | 0.5 | 13.5 | 0.8 | 0.5 | 0.60 | 0.76871 | 2721.4 | 13.2 | 2717.7 | 7.3  | 2715.0 | 8  | -0.24 |
| Erin-RMA : 362173  | 299917  | 19517.5  | 3.062 | 7.4 | 0.6 | 7.2  | 0.9 | 0.4 | 0.61 | 0.70198 | 2109.1 | 11.0 | 2131.8 | 7.8  | 2153.7 | 11 | 2.07  |
| Erin-RMA : 2703064 | 2238420 | 116298.4 | 1.946 | 8.5 | 0.4 | 5.5  | 0.8 | 0.3 | 0.61 | 0.80697 | 1887.6 | 10.0 | 1899.8 | 6.5  | 1913.1 | 8  | 1.33  |
| Erin-RMA : 2295791 | 1901155 | 93184.4  | 2.064 | 5.3 | 0.3 | 13.3 | 0.7 | 0.5 | 0.59 | 0.86612 | 2670.4 | 12.8 | 2700.4 | 6.4  | 2722.9 | 6  | 1.93  |
| Erin-RMA : 1031381 | 854092  | 51720.8  | 1.721 | 7.5 | 0.6 | 7.0  | 0.8 | 0.4 | 0.53 | 0.68913 | 2092.5 | 9.5  | 2106.4 | 6.8  | 2120.1 | 10 | 1.3   |
| Erin-RMA : 1287842 | 1066468 | 191766.6 | 1.119 | 7.2 | 0.4 | 7.6  | 0.7 | 0.4 | 0.62 | 0.83858 | 2164.2 | 11.4 | 2186.6 | 6.6  | 2207.8 | 7  | 1.98  |
| Erin-RMA : 1002595 | 830253  | 67714.5  | 2.248 | 7.0 | 0.5 | 8.1  | 0.7 | 0.4 | 0.54 | 0.75385 | 2228.8 | 10.2 | 2241.7 | 6.5  | 2253.5 | 8  | 1.09  |
| Erin-RMA : 811569  | 672064  | 125968.4 | 1.282 | 7.3 | 0.5 | 7.4  | 0.9 | 0.4 | 0.75 | 0.83055 | 2154.4 | 13.7 | 2164.8 | 8.0  | 2174.7 | 9  | 0.93  |
| Erin-RMA : 1678108 | 1389649 | 146230.5 | 2.358 | 5.4 | 0.3 | 13.2 | 0.6 | 0.5 | 0.47 | 0.81433 | 2679.9 | 10.3 | 2691.7 | 5.4  | 2700.6 | 6  | 0.77  |

|                    |         |          |       |     |     |      |     |     |      |         |        |      |        |      |        |    |       |
|--------------------|---------|----------|-------|-----|-----|------|-----|-----|------|---------|--------|------|--------|------|--------|----|-------|
| Erin-RMA : 1628732 | 1348761 | #####    | 2.246 | 5.3 | 0.4 | 13.5 | 0.7 | 0.5 | 0.58 | 0.84832 | 2719.6 | 12.9 | 2715.6 | 6.5  | 2712.6 | 6  | -0.26 |
| Erin-RMA : 861364  | 713300  | 37069.9  | 1.808 | 8.5 | 0.6 | 5.4  | 0.9 | 0.3 | 0.63 | 0.69738 | 1877.0 | 10.2 | 1892.1 | 7.7  | 1908.8 | 12 | 1.67  |
| Erin-RMA : 1063763 | 880907  | 49109.2  | 3.241 | 6.4 | 0.5 | 9.3  | 0.7 | 0.4 | 0.52 | 0.71888 | 2346.9 | 10.2 | 2368.6 | 6.6  | 2387.4 | 9  | 1.7   |
| Erin-RMA : 921168  | 762823  | 49315.9  | 0.729 | 7.6 | 0.5 | 6.9  | 0.8 | 0.4 | 0.58 | 0.72847 | 2097.2 | 10.3 | 2100.5 | 7.0  | 2103.7 | 10 | 0.31  |
| Erin-RMA : 593499  | 491479  | 30519.1  | 1.288 | 6.1 | 0.5 | 10.4 | 0.9 | 0.5 | 0.76 | 0.81671 | 2464.9 | 15.6 | 2471.5 | 8.6  | 2477.0 | 9  | 0.49  |
| Erin-RMA : 507739  | 420461  | 21825.8  | 3.125 | 7.5 | 0.6 | 7.0  | 0.9 | 0.4 | 0.65 | 0.73481 | 2090.4 | 11.7 | 2109.8 | 7.9  | 2128.7 | 11 | 1.8   |
| Erin-RMA : 1422987 | 1178383 | 134746.3 | 0.793 | 5.3 | 0.5 | 13.5 | 0.7 | 0.5 | 0.51 | 0.74750 | 2712.4 | 11.3 | 2718.6 | 6.4  | 2723.2 | 7  | 0.4   |
| Erin-RMA : 1410458 | 1168007 | 262558.8 | 2.043 | 8.5 | 0.5 | 5.5  | 0.9 | 0.3 | 0.73 | 0.81889 | 1911.1 | 12.1 | 1906.9 | 7.7  | 1902.2 | 9  | -0.47 |
| Erin-RMA : 2403427 | 1990289 | 98977.8  | 2.364 | 5.7 | 0.5 | 11.6 | 0.8 | 0.5 | 0.59 | 0.77088 | 2554.2 | 12.4 | 2576.2 | 7.1  | 2593.5 | 8  | 1.52  |
| Erin-RMA : 954223  | 790197  | 135405.0 | 1.388 | 4.9 | 0.5 | 15.4 | 0.7 | 0.5 | 0.54 | 0.76014 | 2809.3 | 12.3 | 2837.2 | 6.8  | 2857.1 | 7  | 1.67  |
| Erin-RMA : 824474  | 682751  | 131360.5 | 1.783 | 6.7 | 0.4 | 8.8  | 0.8 | 0.4 | 0.72 | 0.86403 | 2312.5 | 14.1 | 2314.7 | 7.6  | 2316.7 | 7  | 0.18  |
| Erin-RMA : 1030951 | 853735  | 67875.0  | 1.904 | 7.1 | 0.5 | 7.9  | 0.8 | 0.4 | 0.60 | 0.76015 | 2228.9 | 11.3 | 2225.2 | 7.1  | 2221.8 | 9  | -0.32 |
| Erin-RMA : 1687277 | 1397242 | 76905.2  | 2.165 | 5.4 | 0.7 | 13.3 | 1.2 | 0.5 | 1.00 | 0.80138 | 2722.7 | 22.1 | 2704.4 | 11.8 | 2690.7 | 12 | -1.19 |
| Erin-RMA : 3505512 | 2902931 | 265827.3 | 3.734 | 7.5 | 0.4 | 7.1  | 0.7 | 0.4 | 0.56 | 0.84266 | 2129.1 | 10.1 | 2128.8 | 5.9  | 2128.5 | 6  | -0.03 |
| Erin-RMA : 576772  | 477627  | 20638.7  | 1.481 | 7.3 | 0.5 | 7.6  | 1.0 | 0.4 | 0.85 | 0.86613 | 2200.7 | 15.9 | 2186.8 | 8.8  | 2173.8 | 9  | -1.24 |
| Erin-RMA : 649542  | 537889  | 606986.7 | 3.997 | 7.6 | 0.5 | 7.0  | 0.8 | 0.4 | 0.69 | 0.83459 | 2110.9 | 12.4 | 2109.0 | 7.3  | 2107.1 | 8  | -0.18 |
| Erin-RMA : 803679  | 665530  | 153895.9 | 1.075 | 8.1 | 0.5 | 5.9  | 0.9 | 0.4 | 0.69 | 0.80393 | 1945.9 | 11.6 | 1966.1 | 7.5  | 1987.4 | 9  | 2.09  |
| Erin-RMA : 936786  | 775757  | 173663.7 | 3.261 | 7.5 | 0.5 | 7.2  | 0.8 | 0.4 | 0.57 | 0.72442 | 2155.4 | 10.4 | 2138.9 | 7.0  | 2123.1 | 9  | -1.52 |
| Erin-RMA : 927971  | 768457  | 198937.9 | 2.492 | 7.5 | 0.6 | 7.2  | 0.9 | 0.4 | 0.65 | 0.74817 | 2128.5 | 11.8 | 2132.3 | 7.8  | 2136.1 | 10 | 0.35  |
| Erin-RMA : 870441  | 720816  | 98940.1  | 1.429 | 7.4 | 0.5 | 7.2  | 0.8 | 0.4 | 0.58 | 0.72989 | 2135.5 | 10.5 | 2137.6 | 7.1  | 2139.6 | 9  | 0.19  |
| Erin-RMA : 1019930 | 844609  | 51499.8  | 2.724 | 7.2 | 0.4 | 7.8  | 0.7 | 0.4 | 0.52 | 0.77985 | 2235.9 | 9.8  | 2213.0 | 6.0  | 2191.9 | 7  | -2.01 |
| Erin-RMA : 666660  | 552065  | 127883.1 | 1.982 | 7.3 | 0.6 | 7.4  | 0.9 | 0.4 | 0.66 | 0.73499 | 2151.5 | 12.1 | 2160.9 | 8.1  | 2169.7 | 11 | 0.84  |
| Erin-RMA : 1894135 | 1568542 | 143442.0 | 2.233 | 5.3 | 0.4 | 13.3 | 0.8 | 0.5 | 0.65 | 0.85751 | 2702.3 | 14.4 | 2701.0 | 7.2  | 2700.1 | 6  | -0.08 |
| Erin-RMA : 413828  | 342693  | 20266.8  | 0.419 | 7.4 | 0.5 | 7.2  | 0.8 | 0.4 | 0.62 | 0.75620 | 2131.2 | 11.2 | 2137.9 | 7.3  | 2144.4 | 9  | 0.62  |
| Erin-RMA : 1483692 | 1228652 | 195256.8 | 2.760 | 7.5 | 0.4 | 7.0  | 0.8 | 0.4 | 0.65 | 0.84540 | 2104.7 | 11.6 | 2113.3 | 6.8  | 2121.6 | 7  | 0.8   |
| Erin-RMA : 1273335 | 1054455 | 206741.3 | 1.698 | 7.3 | 0.4 | 7.6  | 0.8 | 0.4 | 0.66 | 0.83537 | 2199.4 | 12.4 | 2182.2 | 7.1  | 2166.1 | 8  | -1.54 |
| Erin-RMA : 970190  | 803419  | 54412.8  | 2.094 | 3.6 | 0.4 | 24.9 | 0.7 | 0.7 | 0.55 | 0.79866 | 3288.4 | 14.1 | 3303.2 | 6.7  | 3312.2 | 6  | 0.72  |
| Erin-RMA : 1176658 | 974396  | 171026.8 | 1.268 | 5.0 | 0.4 | 14.9 | 0.6 | 0.5 | 0.50 | 0.79254 | 2804.4 | 11.5 | 2811.6 | 6.1  | 2816.8 | 6  | 0.44  |
| Erin-RMA : 1300445 | 1076905 | 48523.9  | 2.352 | 5.3 | 0.4 | 13.3 | 0.7 | 0.5 | 0.64 | 0.87026 | 2706.4 | 14.1 | 2701.1 | 6.9  | 2697.0 | 6  | -0.35 |
| Erin-RMA : 693568  | 574347  | 53161.4  | 1.307 | 7.6 | 0.6 | 6.9  | 0.8 | 0.4 | 0.56 | 0.67447 | 2110.5 | 10.1 | 2102.2 | 7.4  | 2094.1 | 11 | -0.78 |
| Erin-RMA : 1126063 | 932498  | 208044.3 | 1.325 | 6.9 | 0.5 | 8.4  | 0.8 | 0.4 | 0.53 | 0.70852 | 2271.5 | 10.2 | 2271.5 | 6.8  | 2271.5 | 9  | 0     |
| Erin-RMA : 1445566 | 1197080 | 107996.8 | 2.180 | 7.1 | 0.4 | 7.7  | 0.8 | 0.4 | 0.62 | 0.81949 | 2184.5 | 11.6 | 2198.2 | 6.8  | 2210.9 | 8  | 1.19  |
| Erin-RMA : 752814  | 623409  | 37688.7  | 1.365 | 5.6 | 0.4 | 11.9 | 0.8 | 0.5 | 0.69 | 0.85091 | 2567.7 | 14.6 | 2599.8 | 7.6  | 2624.9 | 7  | 2.18  |
| Erin-RMA : 1514550 | 1254206 | 73796.4  | 1.388 | 7.6 | 0.5 | 6.9  | 0.9 | 0.4 | 0.76 | 0.84915 | 2100.0 | 13.6 | 2102.7 | 7.9  | 2105.2 | 8  | 0.24  |
| Erin-RMA : 866444  | 717506  | 30881.7  | 2.167 | 7.4 | 0.4 | 7.3  | 0.9 | 0.4 | 0.75 | 0.86600 | 2157.4 | 13.8 | 2144.2 | 7.8  | 2131.6 | 8  | -1.21 |
| Erin-RMA : 820797  | 679706  | 182263.4 | 2.049 | 7.0 | 0.6 | 8.0  | 0.9 | 0.4 | 0.66 | 0.72550 | 2223.5 | 12.3 | 2233.5 | 8.2  | 2242.7 | 11 | 0.86  |
| Erin-RMA : 1350636 | 1118468 | 123121.4 | 1.535 | 4.6 | 0.5 | 16.9 | 0.8 | 0.6 | 0.63 | 0.76957 | 2921.3 | 14.9 | 2931.7 | 7.9  | 2938.9 | 8  | 0.6   |
| Erin-RMA : 736994  | 610308  | 80430.1  | 4.187 | 7.2 | 0.6 | 7.6  | 1.0 | 0.4 | 0.75 | 0.78658 | 2174.8 | 13.9 | 2187.9 | 8.6  | 2200.2 | 10 | 1.16  |
| Erin-RMA : 1870089 | 1548630 | 83618.3  | 3.478 | 7.5 | 0.5 | 7.0  | 0.9 | 0.4 | 0.70 | 0.80802 | 2102.0 | 12.6 | 2107.4 | 7.7  | 2112.7 | 9  | 0.51  |
| Erin-RMA : 390011  | 322970  | 16724.8  | 1.726 | 6.9 | 0.6 | 8.6  | 0.8 | 0.4 | 0.59 | 0.70627 | 2331.4 | 11.6 | 2297.6 | 7.7  | 2267.7 | 10 | -2.81 |
| Erin-RMA : 2607006 | 2158874 | 813086.5 | 3.135 | 7.0 | 0.5 | 7.9  | 1.0 | 0.4 | 0.90 | 0.87263 | 2203.3 | 16.9 | 2223.2 | 9.3  | 2241.6 | 9  | 1.71  |
| Erin-RMA : 1524470 | 1262421 | 229631.2 | 1.234 | 4.9 | 0.4 | 15.1 | 0.7 | 0.5 | 0.57 | 0.78841 | 2800.0 | 12.9 | 2821.2 | 6.9  | 2836.3 | 7  | 1.28  |

Run 1 (discordant Sept. 2022)

Erin-RMA 3023 2504 1500.0 ##### 5.1 1.0 36.1 1.2 1.3 0.60 0.51448 5473.5 22.1 3668.2 11.5 2789.4 16 -96.2



**TABLE S20: NM8A (no CA) LA-ICPMS U-Pb ZIRCON GEOCHRONOLOGY**

| Zircon<br>#  | Composition |           |           |      |                   |                   |                   |       |                   | Ages              |                   |                   |       |        |       |        |      |       |
|--------------|-------------|-----------|-----------|------|-------------------|-------------------|-------------------|-------|-------------------|-------------------|-------------------|-------------------|-------|--------|-------|--------|------|-------|
|              | U           | U (norm)  | 206Pb/    | U/Th | 206Pb/ 1 $\sigma$ | 207Pb/ 1 $\sigma$ | 206Pb/ 1 $\sigma$ | Error | 206Pb/ 1 $\sigma$ | 207Pb/ 1 $\sigma$ | 206Pb/ 1 $\sigma$ | 206Pb/ 1 $\sigma$ | %     |        |       |        |      |       |
|              | (238 cps)   | (238 cps) | 204Pb     |      | 207Pb (%)         | 235U (%)          | 238U (%)          | Corr. | 238U              | (Ma)              | 235U              | (Ma)              | 207Pb | (Ma)   | Disc. |        |      |       |
| <b>Run 1</b> |             |           |           |      |                   |                   |                   |       |                   |                   |                   |                   |       |        |       |        |      |       |
| Spot 1       | 5599576     | 7112862   | 29964.4   | 5.3  | 15.2              | 0.9               | 0.7               | 2.1   | 0.1               | 1.9               | 0.910491342       | 474.0             | 8.8   | 531.9  | 8.8   | 788.7  | 18.5 | 39.9  |
| Spot 2       | 2169188     | 2755411   | 58210.4   | 1.8  | 17.0              | 1.2               | 0.7               | 2.0   | 0.1               | 1.5               | 0.778781167       | 506.9             | 7.5   | 516.6  | 8.0   | 560.0  | 26.9 | 9.5   |
| Spot 3       | 3751078     | 4764807   | 5788.9    | 3.5  | 19.5              | 3.1               | 0.1               | 4.3   | 0.0               | 1.7               | 0.388083183       | 92.9              | 1.5   | 95.0   | 3.9   | 147.5  | 92.9 | 37.0  |
| Spot 6       | 4755489     | 6040661   | 50161.6   | 4.5  | 12.5              | 1.1               | 2.0               | 2.2   | 0.2               | 1.9               | 0.857266561       | 1099.1            | 18.8  | 1130.0 | 14.8  | 1189.9 | 22.0 | 7.6   |
| Spot 7       | 7597479     | 9650699   | 80811.8   | 15.8 | 12.4              | 0.7               | 2.2               | 1.3   | 0.2               | 1.1               | 0.833450915       | 1173.5            | 11.4  | 1188.9 | 9.0   | 1217.0 | 13.9 | 3.6   |
| Spot 8       | 2235618     | 2839794   | 4861.0    | 1.9  | 18.8              | 1.7               | 0.3               | 4.1   | 0.0               | 2.2               | 0.541319173       | 248.0             | 5.4   | 244.1  | 9.0   | 206.4  | 80.5 | -20.2 |
| Spot 9       | 860473      | 1093016   | 86535.5   | 3.5  | 14.3              | 1.1               | 1.4               | 2.1   | 0.1               | 1.7               | 0.835781649       | 877.4             | 14.1  | 894.2  | 12.2  | 935.9  | 23.1 | 6.2   |
| Spot 10      | 2300319     | 2921980   | 27735.2   | 1.7  | 19.1              | 1.1               | 0.3               | 1.8   | 0.0               | 1.4               | 0.767571523       | 263.9             | 3.5   | 267.1  | 4.1   | 294.8  | 25.8 | 10.5  |
| Spot 11      | 2226489     | 2828197   | 80115.1   | 3.0  | 11.1              | 0.7               | 2.8               | 1.5   | 0.2               | 1.3               | 0.862400444       | 1312.3            | 14.9  | 1363.3 | 10.9  | 1444.3 | 14.0 | 9.1   |
| Spot 12      | 595002      | 755801    | 16460.0   | 2.7  | 12.3              | 1.5               | 2.2               | 2.0   | 0.2               | 1.3               | 0.651046674       | 1135.4            | 13.4  | 1166.4 | 13.7  | 1224.4 | 29.4 | 7.3   |
| Spot 13      | 6313502     | 8019727   | 240506.6  | 3.0  | 12.4              | 0.8               | 2.4               | 1.6   | 0.2               | 1.4               | 0.860778278       | 1233.3            | 15.7  | 1231.5 | 11.6  | 1228.3 | 16.2 | -0.4  |
| Spot 15      | 2332804     | 2963245   | 85796.0   | 3.6  | 12.5              | 0.7               | 2.1               | 1.4   | 0.2               | 1.2               | 0.85830459        | 1108.1            | 12.1  | 1142.1 | 9.5   | 1207.3 | 14.0 | 8.2   |
| Spot 16      | 11524163    | 14638569  | 63559.8   | 1.7  | 19.1              | 0.8               | 0.3               | 1.4   | 0.0               | 1.2               | 0.842411239       | 251.5             | 2.9   | 257.7  | 3.2   | 314.4  | 17.4 | 20.0  |
| Spot 17      | 3524726     | 4477283   | 54893.3   | 1.6  | 8.5               | 1.0               | 5.3               | 2.0   | 0.3               | 1.7               | 0.867931607       | 1796.9            | 26.7  | 1863.9 | 16.7  | 1939.4 | 17.4 | 7.3   |
| Spot 18      | 790212      | 1003767   | 62192.5   | 3.6  | 12.3              | 0.9               | 2.1               | 1.5   | 0.2               | 1.2               | 0.806758304       | 1103.6            | 11.9  | 1148.3 | 10.0  | 1233.9 | 16.9 | 10.6  |
| Spot 19      | 6845115     | 8695008   | 16851.2   | 2.3  | 17.5              | 1.1               | 0.6               | 1.8   | 0.1               | 1.4               | 0.793988917       | 459.6             | 6.2   | 462.3  | 6.6   | 475.9  | 23.8 | 3.4   |
| Spot 20      | 5067409     | 6436877   | 18634.7   | 1.5  | 18.2              | 2.6               | 0.3               | 3.0   | 0.0               | 1.5               | 0.499282903       | 253.1             | 3.7   | 267.3  | 7.1   | 394.0  | 58.4 | 35.8  |
| Spot 22      | 1166512     | 1481762   | 3699.2    | 1.5  | 18.1              | 2.4               | 0.3               | 3.2   | 0.0               | 1.5               | 0.455761237       | 265.3             | 3.8   | 265.6  | 7.5   | 268.4  | 65.2 | 1.2   |
| Spot 23      | 2280900     | 2897314   | 8315082.4 | 5.3  | 12.8              | 0.8               | 2.0               | 1.7   | 0.2               | 1.5               | 0.893243874       | 1098.8            | 15.1  | 1120.0 | 11.4  | 1161.5 | 14.9 | 5.4   |
| Spot 24      | 4695612     | 5964601   | 134026.2  | 3.0  | 12.7              | 1.0               | 2.1               | 1.7   | 0.2               | 1.4               | 0.815324729       | 1127.1            | 14.3  | 1142.4 | 11.6  | 1171.5 | 19.5 | 3.8   |
| Spot 25      | 3296966     | 4187971   | 4462.7    | 1.5  | 18.9              | 0.9               | 0.3               | 1.6   | 0.1               | 1.3               | 0.798335804       | 319.4             | 4.0   | 304.6  | 4.2   | 192.6  | 22.3 | -65.9 |
| Spot 26      | 3873783     | 4920673   | 38247.6   | 1.8  | 13.1              | 1.2               | 1.8               | 2.0   | 0.2               | 1.6               | 0.804810964       | 996.3             | 14.7  | 1031.7 | 12.9  | 1107.6 | 23.5 | 10.0  |
| Spot 27      | 5488921     | 6972303   | 115953.0  | 4.3  | 11.7              | 1.7               | 2.5               | 2.5   | 0.2               | 1.8               | 0.712153062       | 1233.2            | 19.8  | 1272.8 | 18.0  | 1340.4 | 33.6 | 8.0   |
| Spot 28      | 301274      | 382693    | 47380.2   | 2.8  | 13.7              | 2.4               | 1.5               | 3.8   | 0.2               | 3.0               | 0.780081914       | 901.8             | 25.0  | 938.7  | 23.4  | 1026.1 | 48.3 | 12.1  |
| Spot 29      | 6025556     | 7653962   | 54143.0   | 7.9  | 12.7              | 0.9               | 2.0               | 1.8   | 0.2               | 1.5               | 0.853818897       | 1071.1            | 15.0  | 1106.4 | 12.0  | 1176.6 | 18.4 | 9.0   |
| Spot 31      | 2015014     | 2559572   | 205727.3  | 3.7  | 14.3              | 0.8               | 1.4               | 1.4   | 0.1               | 1.1               | 0.817759922       | 890.3             | 9.4   | 905.3  | 8.3   | 941.9  | 16.4 | 5.5   |
| Spot 32      | 525957      | 668097    | 8536.9    | 3.7  | 13.9              | 1.3               | 1.6               | 2.7   | 0.2               | 2.4               | 0.87375435        | 1001.3            | 22.1  | 987.0  | 17.2  | 955.2  | 27.1 | -4.8  |
| Spot 33      | 1831156     | 2326026   | 5239.7    | 4.0  | 16.8              | 1.5               | 0.4               | 3.3   | 0.1               | 2.6               | 0.79945272        | 344.3             | 8.8   | 365.1  | 10.1  | 499.6  | 43.4 | 31.1  |
| Spot 35      | 6471250     | 8220105   | 52883.8   | 3.9  | 13.1              | 0.8               | 1.7               | 1.4   | 0.2               | 1.2               | 0.843446736       | 959.1             | 10.8  | 1004.8 | 9.1   | 1105.8 | 15.4 | 13.3  |
| Spot 36      | 347125      | 440935    | 7488.7    | 1.5  | 12.5              | 2.1               | 2.1               | 3.4   | 0.2               | 2.6               | 0.772399783       | 1119.9            | 26.8  | 1138.3 | 23.1  | 1173.7 | 42.4 | 4.6   |
| Spot 37      | 3261149     | 4142475   | 11351.7   | 1.9  | 19.4              | 1.1               | 0.3               | 2.1   | 0.0               | 1.4               | 0.677309505       | 265.4             | 3.7   | 261.6  | 4.9   | 227.6  | 35.7 | -16.6 |
| Spot 38      | 5813246     | 7384276   | 25122.8   | 1.6  | 19.8              | 1.4               | 0.3               | 3.0   | 0.0               | 2.6               | 0.882394403       | 272.1             | 7.0   | 265.5  | 7.0   | 207.9  | 32.6 | -30.9 |
| Spot 39      | 705287      | 895891    | 14276.8   | 4.1  | 13.8              | 1.7               | 1.4               | 2.2   | 0.1               | 1.3               | 0.609172105       | 875.2             | 10.8  | 906.8  | 13.0  | 984.8  | 35.0 | 11.1  |
| Spot 40      | 2242120     | 2848053   | 23973.6   | 2.4  | 14.4              | 0.8               | 1.4               | 1.5   | 0.1               | 1.2               | 0.823693898       | 895.0             | 10.4  | 897.7  | 9.0   | 904.3  | 17.6 | 1.0   |
| Spot 42      | 3844825     | 4883890   | 1908802.1 | 5.1  | 13.9              | 0.8               | 1.6               | 1.9   | 0.2               | 1.7               | 0.894228536       | 945.8             | 14.7  | 962.4  | 11.6  | 1000.4 | 16.9 | 5.5   |
| Spot 44      | 9443460     | 11995555  | 38903.5   | 10.8 | 19.2              | 1.2               | 0.3               | 1.7   | 0.0               | 1.2               | 0.70515509        | 263.4             | 3.0   | 266.2  | 3.9   | 291.3  | 26.8 | 9.6   |
| Spot 45      | 10540173    | 13388656  | 139456.9  | 11.5 | 13.8              | 0.7               | 1.7               | 1.4   | 0.2               | 1.2               | 0.852780503       | 997.8             | 11.3  | 1003.8 | 9.1   | 1016.9 | 15.1 | 1.9   |
| Spot 46      | 13760142    | 17478822  | 42108.2   | 15.6 | 11.3              | 0.6               | 2.4               | 1.8   | 0.2               | 1.7               | 0.934947634       | 1148.0            | 17.9  | 1238.1 | 13.0  | 1398.5 | 12.4 | 17.9  |

|         |         |          |            |      |      |     |      |     |     |     |             |        |      |        |      |        |       |       |
|---------|---------|----------|------------|------|------|-----|------|-----|-----|-----|-------------|--------|------|--------|------|--------|-------|-------|
| Spot 48 | 2268841 | 2881995  | 23150.4    | 2.5  | 11.5 | 0.7 | 2.6  | 1.8 | 0.2 | 1.6 | 0.908840566 | 1248.2 | 18.3 | 1288.5 | 12.9 | 1356.3 | 14.3  | 8.0   |
| Spot 49 | 1609062 | 2043911  | 29853.9    | 1.3  | 15.7 | 2.2 | 0.8  | 3.2 | 0.1 | 2.4 | 0.743906337 | 578.3  | 13.3 | 610.5  | 14.8 | 731.8  | 45.6  | 21.0  |
| Spot 50 | 1980929 | 2516275  | 59680.6    | 9.2  | 10.4 | 0.7 | 3.3  | 1.8 | 0.2 | 1.7 | 0.920708413 | 1438.2 | 21.7 | 1484.2 | 14.3 | 1550.6 | 13.4  | 7.2   |
| Spot 51 | 1508354 | 1915987  | 23420.2    | 3.2  | 13.5 | 1.2 | 1.7  | 2.0 | 0.2 | 1.6 | 0.803481115 | 1001.7 | 14.6 | 1011.5 | 12.5 | 1032.9 | 23.5  | 3.0   |
| Spot 53 | 614881  | 781053   | 3285.7     | 3.2  | 13.2 | 1.3 | 1.7  | 2.0 | 0.2 | 1.5 | 0.758457323 | 1020.9 | 14.3 | 1008.1 | 12.8 | 980.6  | 26.5  | -4.1  |
| Spot 55 | 1569232 | 1993317  | 68999.5    | 1.8  | 16.7 | 1.3 | 0.8  | 1.7 | 0.1 | 1.0 | 0.596073775 | 562.1  | 5.3  | 570.8  | 7.2  | 605.7  | 28.8  | 7.2   |
| Spot 56 | 1567308 | 1990873  | 20049.9    | 1.9  | 18.6 | 1.4 | 0.5  | 2.4 | 0.1 | 1.9 | 0.7947212   | 444.2  | 8.1  | 428.1  | 8.3  | 342.7  | 32.5  | -29.6 |
| Spot 57 | 979772  | 1244555  | 15958.0    | 4.1  | 13.0 | 1.0 | 2.0  | 1.9 | 0.2 | 1.5 | 0.820998331 | 1131.4 | 15.8 | 1124.7 | 12.7 | 1111.9 | 21.2  | -1.8  |
| Spot 58 | 9040102 | 11483191 | 33064.3    | 3.3  | 17.9 | 0.9 | 0.5  | 1.6 | 0.1 | 1.4 | 0.831191409 | 415.7  | 5.5  | 419.2  | 5.6  | 438.2  | 20.2  | 5.1   |
| Spot 60 | 2500427 | 3176167  | 94908.8    | 3.7  | 15.2 | 1.0 | 1.0  | 1.9 | 0.1 | 1.6 | 0.842734039 | 676.2  | 10.2 | 708.5  | 9.7  | 812.2  | 21.3  | 16.7  |
| Spot 61 | 642490  | 816123   | 9962.3     | 1.9  | 19.3 | 4.9 | 0.2  | 6.6 | 0.0 | 4.3 | 0.659465649 | 183.4  | 7.8  | 186.5  | 11.2 | 226.2  | 114.4 | 18.9  |
| Spot 62 | 4267056 | 5420229  | 100783.6   | 2.1  | 11.7 | 0.9 | 2.5  | 2.0 | 0.2 | 1.7 | 0.878994029 | 1217.9 | 19.1 | 1262.2 | 14.1 | 1338.5 | 18.0  | 9.0   |
| Spot 63 | 3369679 | 4280334  | 16182.8    | 8.3  | 17.3 | 1.3 | 0.5  | 1.8 | 0.1 | 1.2 | 0.667978683 | 377.0  | 4.3  | 395.2  | 5.8  | 503.2  | 28.9  | 25.1  |
| Spot 64 | 4829304 | 6134424  | 14908.8    | 1.6  | 19.0 | 1.4 | 0.2  | 2.1 | 0.0 | 1.5 | 0.707729795 | 218.1  | 3.2  | 223.9  | 4.2  | 285.4  | 33.6  | 23.6  |
| Spot 65 | 3728092 | 4735609  | 2302.4     | 1.0  | 18.6 | 4.1 | 0.1  | 4.8 | 0.0 | 1.8 | 0.386549844 | 53.0   | 1.0  | 53.5   | 2.5  | 76.0   | NA    | 30.3  |
| Spot 66 | 895997  | 1138140  | 649.2      | 2.6  | 16.0 | 5.6 | 0.2  | 6.1 | 0.0 | 2.3 | 0.3772672   | 179.0  | 4.1  | 145.8  | 8.3  | NA     | NA    |       |
| Spot 67 | 2712834 | 3445978  | 205510.7   | 2.5  | 9.9  | 0.7 | 3.4  | 1.5 | 0.2 | 1.3 | 0.865209155 | 1423.8 | 16.0 | 1514.1 | 11.4 | 1642.9 | 13.5  | 13.3  |
| Spot 68 | 1412291 | 1793962  | 2169.9     | 2.0  | 17.8 | 4.4 | 0.2  | 5.3 | 0.0 | 2.8 | 0.531743769 | 160.5  | 4.4  | 161.9  | 7.9  | 181.6  | 103.7 | 11.6  |
| Spot 69 | 7669945 | 9742748  | 15275.7    | 1.2  | 19.2 | 0.9 | 0.3  | 1.4 | 0.0 | 1.1 | 0.778752156 | 257.0  | 2.7  | 256.8  | 3.1  | 254.4  | 20.0  | -1.0  |
| Spot 70 | 1079650 | 1371425  | 51846.1    | 7.4  | 5.8  | 2.7 | 11.1 | 3.2 | 0.5 | 1.8 | 0.568488061 | 2460.5 | 37.8 | 2532.2 | 30.3 | 2590.2 | 44.6  | 5.0   |
| Spot 71 | 5816286 | 7388137  | 9391.3     | 3.3  | 19.8 | 1.3 | 0.2  | 2.2 | 0.0 | 1.6 | 0.720020915 | 172.3  | 2.7  | 171.5  | 3.5  | 160.8  | 35.7  | -7.2  |
| Spot 72 | 3584327 | 4552991  | 25550019.2 | 4.6  | 12.5 | 0.9 | 2.2  | 1.6 | 0.2 | 1.4 | 0.843979433 | 1176.6 | 14.8 | 1185.6 | 11.4 | 1202.0 | 17.2  | 2.1   |
| Spot 73 | 3214174 | 4082805  | 3302.7     | 2.9  | 16.3 | 5.4 | 0.1  | 6.9 | 0.0 | 2.8 | 0.407946473 | 70.5   | 2.0  | 84.3   | 5.5  | 495.2  | 138.0 | 85.8  |
| Spot 75 | 1563690 | 1986278  | 35585.3    | 4.0  | 12.7 | 0.8 | 2.1  | 1.5 | 0.2 | 1.3 | 0.83737342  | 1147.0 | 13.4 | 1150.9 | 10.5 | 1158.3 | 16.5  | 1.0   |
| Spot 76 | 5421577 | 6886759  | 20600.5    | 16.6 | 19.8 | 1.4 | 0.2  | 3.1 | 0.0 | 2.8 | 0.896242879 | 224.8  | 6.2  | 222.2  | 6.2  | 195.2  | 32.1  | -15.1 |
| Spot 77 | 1940340 | 2464717  | 39602.9    | 1.9  | 13.0 | 1.0 | 1.8  | 1.7 | 0.2 | 1.4 | 0.82374362  | 1014.3 | 13.1 | 1045.8 | 11.0 | 1112.0 | 19.1  | 8.8   |
| Spot 78 | 610757  | 775814   | 9591.1     | 1.9  | 14.2 | 1.2 | 1.4  | 1.8 | 0.2 | 1.4 | 0.758165339 | 902.0  | 11.8 | 904.1  | 11.0 | 909.1  | 24.8  | 0.8   |
| Spot 79 | 3789839 | 4814043  | 7007.4     | 1.5  | 19.1 | 1.2 | 0.3  | 1.6 | 0.0 | 1.0 | 0.623992675 | 239.4  | 2.4  | 237.3  | 3.4  | 216.2  | 29.5  | -10.8 |
| Spot 80 | 2846320 | 3615538  | 6553.8     | 1.6  | 19.3 | 1.0 | 0.3  | 2.8 | 0.0 | 1.4 | 0.491251151 | 270.9  | 3.6  | 261.6  | 6.4  | 179.4  | 56.4  | -51.0 |
| Spot 81 | 4671631 | 5934140  | 42638.4    | 6.6  | 15.6 | 0.9 | 0.7  | 2.8 | 0.1 | 2.6 | 0.941770974 | 523.3  | 13.3 | 567.3  | 12.2 | 747.8  | 19.9  | 30.0  |
| Spot 83 | 7501266 | 9528484  | 33529.7    | 18.8 | 12.2 | 0.8 | 2.2  | 1.5 | 0.2 | 1.2 | 0.83878819  | 1151.0 | 13.1 | 1185.0 | 10.3 | 1247.5 | 15.7  | 7.7   |
| Spot 84 | 1126081 | 1430405  | 24326.5    | 1.8  | 19.5 | 1.9 | 0.3  | 2.5 | 0.0 | 1.7 | 0.674238879 | 270.6  | 4.5  | 266.6  | 5.9  | 231.1  | 43.2  | -17.1 |
| Spot 85 | 5294879 | 6725821  | 17724.5    | 0.6  | 19.6 | 1.2 | 0.2  | 1.9 | 0.0 | 1.4 | 0.749315413 | 173.2  | 2.4  | 175.6  | 3.1  | 208.5  | 29.0  | 16.9  |
| Spot 86 | 2108070 | 2677776  | 97115.1    | 13.8 | 14.4 | 0.6 | 1.4  | 1.4 | 0.1 | 1.2 | 0.881291046 | 882.4  | 9.8  | 892.9  | 8.0  | 918.9  | 13.1  | 4.0   |
| Spot 87 | 375763  | 477313   | 3053.5     | 1.3  | 20.3 | 4.3 | 0.2  | 7.3 | 0.0 | 5.9 | 0.806829476 | 199.9  | 11.6 | 179.4  | 12.0 | NA     | NA    |       |
| Spot 88 | 1579211 | 2005993  | 4998.1     | 1.0  | 19.1 | 2.7 | 0.2  | 3.4 | 0.0 | 1.6 | 0.477676386 | 187.1  | 3.0  | 185.7  | 5.7  | 167.8  | 69.4  | -11.5 |
| Spot 89 | 3223454 | 4094593  | 6651.5     | 5.3  | 19.9 | 1.9 | 0.2  | 2.5 | 0.0 | 1.6 | 0.648011    | 195.0  | 3.1  | 188.5  | 4.2  | 108.1  | 44.4  | -80.4 |
| Spot 90 | 3145584 | 3995678  | 63083.5    | 2.0  | 12.2 | 0.8 | 2.2  | 2.0 | 0.2 | 1.8 | 0.905100691 | 1158.2 | 19.2 | 1187.4 | 14.0 | 1241.0 | 16.6  | 6.7   |
| Spot 92 | 649702  | 825284   | 8961.6     | 1.8  | 16.8 | 2.9 | 0.6  | 3.2 | 0.1 | 1.4 | 0.442045376 | 455.7  | 6.2  | 468.1  | 12.0 | 528.9  | 62.8  | 13.8  |
| Spot 93 | 4206616 | 5343454  | 182212.8   | 15.7 | 14.3 | 0.9 | 0.9  | 1.9 | 0.1 | 1.7 | 0.876628999 | 596.1  | 9.7  | 669.5  | 9.5  | 925.0  | 19.2  | 35.6  |
| Spot 94 | 4466112 | 5673078  | 76932.9    | 1.2  | 13.7 | 0.8 | 1.6  | 1.8 | 0.2 | 1.6 | 0.894380096 | 939.7  | 14.2 | 958.7  | 11.3 | 1002.7 | 16.5  | 6.3   |
| Spot 96 | 1674551 | 2127098  | 3085.7     | 1.9  | 20.3 | 2.1 | 0.2  | 3.5 | 0.0 | 2.0 | 0.577581791 | 164.3  | 3.2  | 149.2  | 4.8  | NA     | NA    |       |
| Spot 97 | 1392098 | 1768313  | 44494.7    | 5.0  | 14.0 | 1.0 | 1.5  | 2.1 | 0.2 | 1.9 | 0.885908271 | 929.3  | 16.1 | 938.4  | 12.8 | 959.8  | 19.8  | 3.2   |

|          |         |         |          |      |      |     |     |     |     |     |             |        |      |        |      |        |       |        |
|----------|---------|---------|----------|------|------|-----|-----|-----|-----|-----|-------------|--------|------|--------|------|--------|-------|--------|
| Spot 98  | 1268414 | 1611203 | 40908.5  | 1.6  | 16.2 | 1.4 | 0.9 | 1.9 | 0.1 | 1.4 | 0.698844625 | 658.9  | 8.5  | 659.3  | 9.4  | 660.3  | 29.8  | 0.2    |
| Spot 99  | 4556339 | 5787689 | 101677.5 | 13.5 | 12.5 | 0.8 | 2.1 | 1.5 | 0.2 | 1.3 | 0.85666387  | 1133.2 | 13.5 | 1156.6 | 10.5 | 1200.6 | 15.4  | 5.6    |
| Spot 100 | 810876  | 1030016 | 11649.6  | 1.2  | 19.2 | 3.0 | 0.3 | 3.6 | 0.0 | 2.1 | 0.578577027 | 277.2  | 5.7  | 272.9  | 8.7  | 235.6  | 68.3  | -17.6  |
| Spot 101 | 1537319 | 1952779 | 16041.4  | 5.9  | 11.6 | 0.9 | 2.6 | 1.8 | 0.2 | 1.5 | 0.864338802 | 1285.3 | 18.0 | 1297.0 | 13.1 | 1316.4 | 17.4  | 2.4    |
| Spot 102 | 656475  | 833888  | 31245.8  | 1.9  | 12.7 | 1.0 | 2.1 | 1.7 | 0.2 | 1.4 | 0.801477916 | 1149.2 | 14.6 | 1151.8 | 11.9 | 1156.7 | 20.6  | 0.6    |
| Spot 103 | 1567865 | 1991580 | 340975.0 | 5.8  | 10.4 | 0.9 | 3.4 | 1.4 | 0.3 | 1.1 | 0.769626437 | 1480.0 | 14.2 | 1509.0 | 10.9 | 1549.8 | 16.7  | 4.5    |
| Spot 104 | 902694  | 1146647 | 21739.9  | 1.9  | 14.1 | 1.0 | 1.6 | 1.7 | 0.2 | 1.4 | 0.810276227 | 980.0  | 12.8 | 968.7  | 10.9 | 943.1  | 20.9  | -3.9   |
| Spot 105 | 2232529 | 2835869 | 3722.5   | 1.6  | 18.1 | 1.4 | 0.3 | 2.2 | 0.0 | 1.4 | 0.626245879 | 271.5  | 3.7  | 269.9  | 5.2  | 256.9  | 39.3  | -5.7   |
| Spot 106 | 4293587 | 5453930 | 12547.2  | 1.6  | 19.0 | 1.2 | 0.3 | 2.0 | 0.0 | 1.7 | 0.81091658  | 258.9  | 4.2  | 259.8  | 4.7  | 268.7  | 27.3  | 3.7    |
| Spot 108 | 1816492 | 2307399 | 6938.6   | 1.1  | 19.1 | 2.1 | 0.3 | 2.6 | 0.0 | 1.5 | 0.582868258 | 265.3  | 3.9  | 259.5  | 5.9  | 207.0  | 48.6  | -28.2  |
| Spot 109 | 1931724 | 2453773 | 6865.7   | 1.4  | 19.6 | 1.3 | 0.3 | 1.8 | 0.0 | 1.3 | 0.687100273 | 266.9  | 3.3  | 254.8  | 4.1  | 145.5  | 31.1  | -83.5  |
| Spot 110 | 591369  | 751186  | 1980.6   | 1.7  | 17.9 | 4.1 | 0.3 | 5.0 | 0.0 | 1.9 | 0.369725514 | 260.7  | 4.8  | 247.9  | 11.1 | 128.2  | 110.2 | -103.3 |
| Spot 111 | 3073296 | 3903854 | 38028.3  | 2.3  | 11.8 | 1.0 | 2.5 | 1.7 | 0.2 | 1.3 | 0.790772379 | 1251.7 | 14.9 | 1271.5 | 12.0 | 1305.1 | 19.7  | 4.1    |
| Spot 112 | 2135639 | 2712796 | 33741.4  | 1.8  | 12.4 | 0.9 | 2.0 | 2.1 | 0.2 | 1.9 | 0.898221812 | 1070.7 | 18.9 | 1115.3 | 14.4 | 1203.4 | 18.4  | 11.0   |
| Spot 113 | 2216279 | 2815228 | 16149.4  | 7.0  | 16.7 | 1.4 | 0.7 | 2.6 | 0.1 | 2.1 | 0.837894715 | 554.5  | 11.4 | 556.6  | 11.0 | 564.9  | 30.5  | 1.8    |
| Spot 114 | 2528522 | 3211855 | 15201.7  | 1.9  | 19.6 | 2.7 | 0.3 | 5.0 | 0.0 | 4.2 | 0.84150252  | 280.2  | 11.5 | 270.7  | 11.9 | 190.1  | 62.9  | -47.4  |
| Spot 115 | 4342391 | 5515922 | 6832.8   | 10.3 | 19.6 | 1.3 | 0.2 | 2.0 | 0.0 | 1.4 | 0.738495649 | 232.1  | 3.3  | 224.4  | 4.0  | 144.5  | 31.0  | -60.6  |
| Spot 117 | 6628984 | 8420468 | 117782.9 | 16.4 | 20.1 | 1.8 | 0.3 | 2.5 | 0.0 | 1.8 | 0.701551823 | 233.4  | 4.1  | 228.1  | 5.2  | 173.4  | 42.4  | -34.6  |
| Spot 118 | 6840850 | 8689590 | 57265.5  | 10.1 | 13.0 | 0.9 | 1.8 | 1.7 | 0.2 | 1.5 | 0.867642927 | 1023.5 | 14.3 | 1049.7 | 11.4 | 1104.7 | 17.4  | 7.4    |
| Spot 119 | 2331061 | 2961031 | 12074.0  | 3.8  | 14.2 | 1.0 | 1.2 | 1.9 | 0.1 | 1.6 | 0.837355159 | 786.5  | 11.9 | 818.8  | 10.8 | 907.4  | 21.7  | 13.3   |
| Spot 121 | 1496019 | 1900318 | 38639.3  | 2.7  | 12.6 | 1.1 | 2.2 | 1.7 | 0.2 | 1.3 | 0.752162633 | 1191.0 | 13.6 | 1182.4 | 11.6 | 1166.7 | 21.7  | -2.1   |
| Spot 122 | 1335224 | 1696069 | 100006.4 | 1.0  | 8.3  | 0.8 | 5.3 | 1.8 | 0.3 | 1.7 | 0.905625716 | 1780.1 | 25.9 | 1870.1 | 15.7 | 1971.6 | 13.9  | 9.7    |
| Spot 123 | 2434535 | 3092468 | 17117.0  | 1.4  | 18.5 | 2.0 | 0.3 | 2.5 | 0.0 | 1.5 | 0.605660202 | 282.4  | 4.2  | 288.6  | 6.4  | 339.3  | 45.6  | 16.8   |
| Spot 125 | 7242723 | 9200070 | 10672.9  | 8.7  | 16.0 | 1.3 | 0.4 | 2.1 | 0.0 | 1.3 | 0.626383351 | 287.3  | 3.6  | 331.2  | 5.8  | 652.5  | 34.4  | 56.0   |
| Spot 126 | 1617130 | 2054160 | 32507.1  | 1.7  | 19.3 | 1.9 | 0.3 | 2.3 | 0.0 | 1.4 | 0.598754403 | 273.8  | 3.8  | 272.8  | 5.6  | 264.0  | 43.1  | -3.7   |
| Spot 127 | 2703073 | 3433579 | 54185.9  | 1.6  | 12.5 | 0.8 | 2.0 | 1.8 | 0.2 | 1.6 | 0.883959992 | 1046.3 | 15.2 | 1098.6 | 12.0 | 1203.7 | 16.4  | 13.1   |
| Spot 128 | 2855418 | 3627095 | 22053.6  | 1.6  | 18.9 | 2.0 | 0.3 | 2.5 | 0.0 | 1.5 | 0.612692996 | 276.1  | 4.1  | 278.8  | 6.1  | 302.2  | 45.0  | 8.6    |
| Spot 130 | 5363410 | 6812872 | 55474.8  | 1.8  | 12.1 | 0.8 | 2.2 | 1.6 | 0.2 | 1.3 | 0.859908037 | 1128.7 | 13.9 | 1171.3 | 10.8 | 1251.0 | 15.5  | 9.8    |
| Spot 131 | 1398206 | 1776071 | 15583.5  | 4.9  | 12.7 | 0.7 | 2.1 | 1.7 | 0.2 | 1.5 | 0.899415335 | 1169.6 | 15.9 | 1159.2 | 11.5 | 1139.8 | 14.4  | -2.6   |
| Spot 132 | 961286  | 1221074 | 48784.9  | 3.6  | 12.9 | 2.1 | 2.1 | 2.8 | 0.2 | 1.9 | 0.664786383 | 1166.9 | 20.1 | 1151.8 | 19.5 | 1123.5 | 42.3  | -3.9   |
| Spot 133 | 2802755 | 3560200 | 23972.2  | 3.2  | 12.1 | 0.6 | 2.4 | 1.6 | 0.2 | 1.4 | 0.91523371  | 1220.5 | 16.0 | 1230.5 | 11.2 | 1248.0 | 12.4  | 2.2    |
| Spot 134 | 1965321 | 2496449 | 7736.4   | 1.7  | 18.8 | 2.3 | 0.3 | 2.6 | 0.0 | 1.1 | 0.406827685 | 278.8  | 2.9  | 276.1  | 6.3  | 253.4  | 54.8  | -10.0  |
| Spot 135 | 1120457 | 1423260 | 12254.4  | 2.3  | 9.0  | 0.6 | 4.8 | 1.6 | 0.3 | 1.5 | 0.919963403 | 1774.1 | 22.7 | 1785.7 | 13.4 | 1799.4 | 11.4  | 1.4    |
| Spot 136 | 5317936 | 6755108 | 33299.7  | 1.7  | 19.0 | 1.0 | 0.3 | 1.7 | 0.0 | 1.4 | 0.815582462 | 281.2  | 3.7  | 282.8  | 4.1  | 296.2  | 22.0  | 5.1    |
| Spot 137 | 447927  | 568979  | 37631.3  | 2.8  | 12.7 | 1.1 | 2.1 | 1.9 | 0.2 | 1.6 | 0.814316643 | 1144.6 | 16.6 | 1145.9 | 13.4 | 1148.4 | 22.5  | 0.3    |
| Spot 140 | 2120022 | 2692958 | 35108.1  | 3.4  | 12.8 | 0.9 | 2.1 | 1.9 | 0.2 | 1.6 | 0.875969658 | 1141.1 | 17.2 | 1138.7 | 12.9 | 1134.1 | 18.1  | -0.6   |
| Spot 141 | 4844054 | 6153160 | 4472.1   | 1.9  | 17.4 | 1.9 | 0.2 | 2.8 | 0.0 | 2.0 | 0.722699872 | 180.0  | 3.6  | 194.3  | 4.9  | 371.5  | 43.4  | 51.6   |
| Spot 143 | 1532373 | 1946497 | 36306.9  | 3.2  | 14.1 | 0.9 | 1.5 | 1.5 | 0.2 | 1.3 | 0.826146976 | 915.9  | 10.9 | 924.5  | 9.4  | 944.9  | 17.8  | 3.1    |
| Spot 144 | 1938562 | 2462459 | 3385.0   | 1.7  | 19.6 | 1.2 | 0.3 | 2.2 | 0.0 | 1.2 | 0.55291087  | 271.1  | 3.2  | 248.0  | 4.9  | 34.7   | NA    | -682.2 |
| Spot 146 | 1315918 | 1671545 | 20927.2  | 2.0  | 16.1 | 1.1 | 0.9 | 1.7 | 0.1 | 1.2 | 0.7206247   | 630.6  | 7.3  | 636.7  | 8.0  | 658.2  | 25.2  | 4.2    |
| Spot 147 | 2438797 | 3097882 | 75935.9  | 2.6  | 13.1 | 4.4 | 1.0 | 5.5 | 0.1 | 3.2 | 0.586485397 | 590.4  | 18.2 | 708.9  | 28.0 | 1104.7 | 88.9  | 46.6   |
| Spot 148 | 1694632 | 2152606 | 35207.7  | 0.7  | 8.6  | 0.7 | 5.4 | 1.2 | 0.3 | 1.0 | 0.802272841 | 1857.8 | 15.8 | 1877.0 | 10.4 | 1898.3 | 13.1  | 2.1    |
| Spot 149 | 3649829 | 4636196 | 97997.1  | 2.9  | 12.2 | 0.8 | 2.3 | 1.3 | 0.2 | 1.0 | 0.801986942 | 1208.6 | 11.5 | 1221.4 | 9.2  | 1244.1 | 15.2  | 2.9    |

|          |          |          |          |      |      |     |     |     |     |     |             |        |      |        |      |        |      |       |
|----------|----------|----------|----------|------|------|-----|-----|-----|-----|-----|-------------|--------|------|--------|------|--------|------|-------|
| Spot 150 | 5604463  | 7119070  | 695766.4 | 1.1  | 19.0 | 1.5 | 0.3 | 2.2 | 0.0 | 1.6 | 0.741682386 | 277.3  | 4.4  | 281.0  | 5.4  | 311.7  | 33.6 | 11.0  |
| Spot 151 | 4811577  | 6111905  | 37797.1  | 1.4  | 19.3 | 1.0 | 0.3 | 2.0 | 0.0 | 1.7 | 0.866770978 | 265.8  | 4.4  | 265.0  | 4.6  | 257.9  | 22.4 | -3.1  |
| Spot 152 | 895856   | 1137961  | 8968.4   | 1.4  | 16.5 | 1.7 | 0.7 | 3.3 | 0.1 | 2.8 | 0.834683305 | 528.4  | 14.0 | 536.1  | 13.8 | 569.1  | 39.6 | 7.1   |
| Spot 154 | 10350439 | 13147646 | 16661.6  | 0.8  | 19.5 | 1.0 | 0.3 | 1.8 | 0.0 | 1.4 | 0.818501657 | 252.0  | 3.6  | 248.3  | 3.9  | 214.0  | 23.4 | -17.7 |
| Spot 156 | 1975123  | 2508900  | 8185.6   | 1.5  | 19.2 | 2.4 | 0.2 | 3.1 | 0.0 | 1.9 | 0.604705425 | 156.3  | 2.9  | 159.1  | 4.5  | 201.2  | 56.7 | 22.3  |
| Spot 157 | 463653   | 588955   | 9184.6   | 1.6  | 13.9 | 1.1 | 1.4 | 2.2 | 0.1 | 1.8 | 0.853315623 | 877.7  | 15.2 | 894.9  | 12.9 | 937.7  | 23.1 | 6.4   |
| Spot 158 | 8512373  | 10812842 | 62034.6  | 3.7  | 19.5 | 0.8 | 0.3 | 1.4 | 0.0 | 1.1 | 0.813460825 | 231.5  | 2.6  | 231.9  | 2.9  | 235.3  | 18.8 | 1.6   |
| Spot 159 | 6188364  | 7860770  | 18847.0  | 0.8  | 18.3 | 0.9 | 0.4 | 1.8 | 0.1 | 1.6 | 0.863153046 | 371.6  | 5.6  | 370.7  | 5.6  | 364.6  | 20.6 | -1.9  |
| Spot 160 | 1256880  | 1596552  | 9360.6   | 2.6  | 12.8 | 0.9 | 2.1 | 1.5 | 0.2 | 1.2 | 0.809908222 | 1150.2 | 12.7 | 1133.4 | 10.2 | 1101.2 | 17.5 | -4.5  |
| Spot 161 | 3420610  | 4345030  | 35850.2  | 5.5  | 14.2 | 0.6 | 1.4 | 1.4 | 0.1 | 1.3 | 0.900164527 | 865.1  | 10.3 | 880.4  | 8.3  | 919.3  | 12.7 | 5.9   |
| Spot 162 | 2230030  | 2832696  | 6283.4   | 1.9  | 13.2 | 4.4 | 0.4 | 4.7 | 0.0 | 1.7 | 0.363356671 | 273.7  | 4.6  | 370.0  | 14.6 | 1028.6 | 88.5 | 73.4  |
| Spot 163 | 2282376  | 2899188  | 42898.1  | 7.7  | 13.7 | 1.1 | 1.6 | 1.8 | 0.2 | 1.5 | 0.804636625 | 978.4  | 13.5 | 983.0  | 11.6 | 993.4  | 22.2 | 1.5   |
| Spot 164 | 354196   | 449918   | 19396.7  | 4.0  | 12.2 | 2.0 | 2.2 | 3.0 | 0.2 | 2.2 | 0.745460931 | 1159.8 | 23.4 | 1183.6 | 20.6 | 1227.5 | 38.6 | 5.5   |
| Spot 165 | 3319906  | 4217110  | 34480.1  | 1.1  | 19.0 | 1.3 | 0.3 | 1.9 | 0.0 | 1.3 | 0.708279224 | 255.4  | 3.3  | 257.9  | 4.2  | 280.7  | 30.1 | 9.0   |
| Spot 166 | 388562   | 493571   | 1784.5   | 2.2  | 16.1 | 3.6 | 0.7 | 5.4 | 0.1 | 4.0 | 0.747208934 | 551.1  | 21.3 | 515.3  | 21.8 | 359.3  | 80.8 | -53.4 |
| Spot 167 | 1836990  | 2333437  | 71009.4  | 2.3  | 14.2 | 1.0 | 1.5 | 1.4 | 0.2 | 1.1 | 0.740235821 | 953.5  | 9.4  | 946.6  | 8.8  | 930.6  | 19.7 | -2.5  |
| Spot 168 | 2330881  | 2960802  | 5194.7   | 1.8  | 18.7 | 1.5 | 0.3 | 2.1 | 0.0 | 1.3 | 0.615197789 | 264.2  | 3.4  | 260.1  | 4.9  | 223.2  | 39.0 | -18.4 |
| Spot 170 | 528411   | 671214   | 1249.8   | 2.1  | 18.1 | 3.9 | 0.3 | 7.1 | 0.0 | 2.8 | 0.400623353 | 275.2  | 7.6  | 235.3  | 14.8 | NA     | NA   |       |
| Spot 171 | 3529235  | 4483011  | 72623.4  | 9.6  | 8.9  | 1.1 | 4.8 | 1.8 | 0.3 | 1.5 | 0.804037951 | 1722.4 | 22.1 | 1776.3 | 15.2 | 1840.2 | 19.5 | 6.4   |
| Spot 172 | 3640045  | 4623768  | 405628.0 | 12.7 | 12.6 | 0.9 | 2.2 | 1.6 | 0.2 | 1.4 | 0.833619925 | 1170.0 | 14.5 | 1172.3 | 11.3 | 1176.4 | 17.7 | 0.5   |
| Spot 173 | 12923884 | 16416564 | 35198.9  | 4.6  | 12.1 | 1.0 | 2.1 | 1.5 | 0.2 | 1.1 | 0.7330992   | 1091.5 | 10.7 | 1144.9 | 10.0 | 1247.4 | 19.4 | 12.5  |
| Spot 175 | 762998   | 969198   | 11429.0  | 2.4  | 18.5 | 2.2 | 0.3 | 2.7 | 0.0 | 1.6 | 0.593035282 | 264.4  | 4.1  | 269.6  | 6.4  | 315.5  | 49.4 | 16.2  |
| Spot 177 | 2288013  | 2906349  | 31247.1  | 2.2  | 16.5 | 1.5 | 0.7 | 2.5 | 0.1 | 2.0 | 0.806058546 | 548.4  | 10.7 | 560.4  | 10.9 | 609.2  | 32.3 | 10.0  |
| Spot 178 | 1509686  | 1917679  | 13198.6  | 1.1  | 17.4 | 2.2 | 0.3 | 2.6 | 0.0 | 1.4 | 0.526006959 | 264.6  | 3.5  | 285.9  | 6.5  | 463.8  | 49.1 | 43.0  |
| Spot 179 | 1057026  | 1342687  | 789.8    | 1.9  | 19.7 | 3.8 | 0.1 | 5.5 | 0.0 | 3.7 | 0.663398381 | 125.3  | 4.5  | 83.4   | 4.4  | NA     | NA   |       |
| Spot 181 | 5316663  | 6753491  | 33620.1  | 5.2  | 19.4 | 1.4 | 0.3 | 2.2 | 0.0 | 1.6 | 0.762298932 | 241.5  | 3.9  | 241.4  | 4.6  | 240.5  | 32.1 | -0.4  |
| Spot 182 | 5559509  | 7061966  | 88040.8  | 0.9  | 17.6 | 1.0 | 0.5 | 1.8 | 0.1 | 1.5 | 0.838333212 | 410.9  | 6.0  | 421.4  | 6.2  | 479.3  | 21.6 | 14.3  |
| Spot 184 | 1559961  | 1981540  | 35555.9  | 2.6  | 13.3 | 0.9 | 1.7 | 1.7 | 0.2 | 1.4 | 0.856679656 | 1009.1 | 13.5 | 1025.6 | 10.9 | 1060.9 | 17.5 | 4.9   |
| Spot 186 | 2084902  | 2648347  | 10263.6  | 11.1 | 17.1 | 1.2 | 0.6 | 2.5 | 0.1 | 2.2 | 0.871521053 | 503.1  | 10.5 | 501.9  | 9.9  | 496.3  | 27.0 | -1.4  |
| Spot 187 | 5348680  | 6794161  | 35577.8  | 9.3  | 16.8 | 1.2 | 0.6 | 1.9 | 0.1 | 1.4 | 0.752288722 | 488.7  | 6.7  | 502.5  | 7.5  | 565.6  | 27.2 | 13.6  |
| Spot 189 | 3768148  | 4786490  | 16005.0  | 6.1  | 17.8 | 0.9 | 0.4 | 1.5 | 0.1 | 1.2 | 0.772901508 | 341.7  | 3.9  | 353.1  | 4.5  | 428.7  | 21.3 | 20.3  |
| Spot 190 | 3210128  | 4077666  | 12702.7  | 1.4  | 19.1 | 1.0 | 0.3 | 2.1 | 0.0 | 1.8 | 0.871621133 | 304.8  | 5.4  | 298.9  | 5.4  | 253.4  | 23.3 | -20.3 |
| Spot 191 | 1552141  | 1971607  | 3440.3   | 2.3  | 18.0 | 2.8 | 0.3 | 4.1 | 0.0 | 1.8 | 0.440218665 | 286.5  | 5.1  | 283.5  | 10.2 | 258.5  | 84.7 | -10.8 |
| Spot 192 | 4050451  | 5145085  | 33296.2  | 2.0  | 10.2 | 1.0 | 3.4 | 2.2 | 0.3 | 2.0 | 0.892403159 | 1461.7 | 25.6 | 1513.1 | 17.3 | 1585.9 | 18.5 | 7.8   |
| Spot 193 | 2568116  | 3262149  | 7098.0   | 2.3  | 11.0 | 1.4 | 2.4 | 1.8 | 0.2 | 1.2 | 0.655367514 | 1150.1 | 12.7 | 1242.0 | 13.2 | 1405.1 | 26.6 | 18.1  |
| Spot 194 | 1021822  | 1297969  | 7397.9   | 1.5  | 10.3 | 1.0 | 3.6 | 1.6 | 0.3 | 1.3 | 0.804261733 | 1572.2 | 18.4 | 1559.0 | 13.1 | 1541.1 | 18.3 | -2.0  |
| Spot 195 | 1977689  | 2512159  | 8657.5   | 2.2  | 20.2 | 2.3 | 0.2 | 3.3 | 0.0 | 2.3 | 0.695571311 | 163.1  | 3.7  | 158.9  | 4.8  | 97.0   | 55.4 | -68.2 |
| Spot 196 | 7340414  | 9324161  | 46733.6  | 16.6 | 13.9 | 0.7 | 1.6 | 1.4 | 0.2 | 1.2 | 0.883626976 | 989.9  | 11.4 | 987.8  | 8.9  | 983.3  | 13.4 | -0.7  |
| Spot 197 | 6226882  | 7909697  | 42921.6  | 3.4  | 11.1 | 1.1 | 2.7 | 2.2 | 0.2 | 1.9 | 0.86239266  | 1268.2 | 21.9 | 1325.7 | 16.4 | 1419.8 | 21.4 | 10.7  |
| Spot 198 | 2534327  | 3219229  | 25892.2  | 19.1 | 12.3 | 0.7 | 2.3 | 1.7 | 0.2 | 1.6 | 0.907062628 | 1185.3 | 16.9 | 1197.0 | 12.1 | 1218.1 | 14.2 | 2.7   |
| Spot 199 | 3116879  | 3959216  | 4494.4   | 2.2  | 18.1 | 2.3 | 0.2 | 3.1 | 0.0 | 1.9 | 0.619285981 | 153.8  | 2.9  | 162.3  | 4.6  | 287.9  | 55.1 | 46.6  |
| Spot 200 | 3960779  | 5031180  | 757253.3 | 18.4 | 9.9  | 0.8 | 3.6 | 2.0 | 0.3 | 1.8 | 0.905870916 | 1471.6 | 23.7 | 1549.9 | 15.8 | 1658.4 | 15.6 | 11.3  |
| Spot 201 | 1042231  | 1323894  | 17115.4  | 3.3  | 11.6 | 1.2 | 2.8 | 1.9 | 0.2 | 1.5 | 0.776030322 | 1353.4 | 17.7 | 1343.7 | 13.9 | 1328.2 | 22.8 | -1.9  |

|          |          |          |           |      |      |     |     |     |     |     |             |        |      |        |      |        |       |         |
|----------|----------|----------|-----------|------|------|-----|-----|-----|-----|-----|-------------|--------|------|--------|------|--------|-------|---------|
| Spot 202 | 2031631  | 2580680  | 6651.1    | 5.5  | 19.9 | 1.5 | 0.3 | 2.3 | 0.0 | 1.6 | 0.724438948 | 241.0  | 3.9  | 228.7  | 4.6  | 103.6  | 36.8  | -132.5  |
| Spot 203 | 2187946  | 2779238  | 3715.4    | 2.5  | 19.4 | 4.6 | 0.1 | 5.6 | 0.0 | 3.2 | 0.567636903 | 69.6   | 2.2  | 70.2   | 3.8  | 92.8   | NA    | 25.1    |
| Spot 204 | 3799017  | 4825701  | 17173.0   | 1.9  | 19.6 | 1.3 | 0.3 | 2.1 | 0.0 | 1.6 | 0.767886029 | 254.6  | 4.1  | 250.4  | 4.8  | 211.5  | 31.8  | -20.4   |
| Spot 205 | 775114   | 984589   | 3498.9    | 1.6  | 17.4 | 4.0 | 0.2 | 5.0 | 0.0 | 2.9 | 0.573867046 | 169.7  | 4.8  | 182.3  | 8.3  | 349.0  | 92.0  | 51.4    |
| Spot 206 | 336020   | 426829   | 4899.1    | 3.0  | 11.6 | 2.0 | 2.0 | 3.1 | 0.2 | 2.1 | 0.677029684 | 1029.0 | 19.8 | 1113.6 | 20.8 | 1282.6 | 44.0  | 19.8    |
| Spot 207 | 4286434  | 5444842  | 59434.7   | 0.6  | 11.9 | 0.7 | 2.5 | 1.6 | 0.2 | 1.4 | 0.885214202 | 1257.4 | 15.7 | 1273.4 | 11.3 | 1300.3 | 14.1  | 3.3     |
| Spot 209 | 7596463  | 9649408  | 205226.8  | 29.4 | 13.2 | 0.9 | 1.9 | 1.5 | 0.2 | 1.2 | 0.817474021 | 1065.4 | 12.3 | 1078.7 | 10.2 | 1105.8 | 17.6  | 3.6     |
| Spot 210 | 1426150  | 1811568  | 11241.9   | 2.9  | 16.5 | 2.3 | 0.7 | 3.2 | 0.1 | 2.2 | 0.672586738 | 559.5  | 11.6 | 564.9  | 13.9 | 586.4  | 51.7  | 4.6     |
| Spot 211 | 2632803  | 3344319  | 2636.3    | 0.7  | 19.3 | 1.4 | 0.3 | 1.9 | 0.0 | 1.3 | 0.676041169 | 252.5  | 3.2  | 231.0  | 3.9  | 17.4   | NA    | -1347.3 |
| Spot 213 | 318542   | 404627   | 3034.3    | 5.7  | 14.1 | 2.3 | 1.2 | 5.3 | 0.1 | 3.2 | 0.598262813 | 823.4  | 24.5 | 821.8  | 29.9 | 817.4  | 88.8  | -0.7    |
| Spot 214 | 2876313  | 3653637  | 19818.2   | 4.7  | 11.9 | 1.1 | 2.3 | 1.9 | 0.2 | 1.5 | 0.797521568 | 1192.2 | 16.2 | 1224.4 | 13.3 | 1281.5 | 21.9  | 7.0     |
| Spot 215 | 1488564  | 1890849  | 4440.1    | 1.9  | 19.6 | 2.7 | 0.2 | 3.6 | 0.0 | 2.4 | 0.666846196 | 195.8  | 4.7  | 189.0  | 6.3  | 104.4  | 64.0  | -87.6   |
| Spot 217 | 893748   | 1135284  | 386449.5  | 1.8  | 14.0 | 1.4 | 1.5 | 1.8 | 0.2 | 1.3 | 0.678699983 | 911.3  | 10.6 | 933.9  | 11.2 | 987.6  | 27.5  | 7.7     |
| Spot 218 | 4809302  | 6109016  | 2673057.3 | 1.6  | 19.1 | 1.2 | 0.3 | 1.8 | 0.0 | 1.3 | 0.753042844 | 259.0  | 3.4  | 265.5  | 4.1  | 323.2  | 26.2  | 19.9    |
| Spot 219 | 1906060  | 2421172  | 7915.6    | 1.3  | 19.7 | 1.9 | 0.3 | 3.5 | 0.0 | 3.0 | 0.836858753 | 293.5  | 8.5  | 280.1  | 8.7  | 169.5  | 45.4  | -73.1   |
| Spot 220 | 3114149  | 3955748  | 22387.3   | 2.7  | 12.6 | 1.0 | 2.1 | 1.7 | 0.2 | 1.4 | 0.806623524 | 1146.3 | 14.6 | 1159.8 | 11.9 | 1185.0 | 20.2  | 3.3     |
| Spot 221 | 1575515  | 2001299  | 800987.8  | 1.6  | 6.2  | 0.7 | 9.5 | 1.6 | 0.4 | 1.5 | 0.900682631 | 2293.5 | 28.2 | 2391.7 | 14.9 | 2476.4 | 11.9  | 7.4     |
| Spot 222 | 505986   | 642728   | 30875.5   | 1.5  | 14.4 | 1.3 | 1.4 | 2.9 | 0.1 | 2.6 | 0.886676677 | 865.3  | 20.9 | 880.1  | 17.1 | 917.5  | 27.7  | 5.7     |
| Spot 223 | 2875777  | 3652956  | 22183.8   | 1.4  | 13.6 | 1.1 | 1.5 | 2.1 | 0.1 | 1.8 | 0.845996331 | 867.7  | 14.6 | 913.0  | 12.8 | 1024.2 | 22.9  | 15.3    |
| Spot 224 | 5195261  | 6599281  | 7500.3    | 1.2  | 19.2 | 1.3 | 0.2 | 2.1 | 0.0 | 1.5 | 0.746766159 | 221.4  | 3.3  | 221.7  | 4.1  | 225.0  | 31.6  | 1.6     |
| Spot 225 | 13455474 | 17091817 | 86886.5   | 4.1  | 18.4 | 0.9 | 0.4 | 1.5 | 0.1 | 1.3 | 0.816481514 | 363.3  | 4.4  | 368.7  | 4.7  | 403.3  | 19.8  | 9.9     |
| Spot 226 | 1107771  | 1407146  | 16014.8   | 1.9  | 18.3 | 2.0 | 0.4 | 2.9 | 0.1 | 2.1 | 0.717045916 | 337.8  | 6.8  | 343.8  | 8.4  | 384.6  | 44.9  | 12.2    |
| Spot 227 | 961386   | 1221201  | 64546.6   | 3.5  | 14.1 | 1.2 | 1.6 | 2.3 | 0.2 | 1.9 | 0.84992572  | 954.6  | 17.1 | 957.9  | 14.1 | 965.6  | 24.5  | 1.1     |
| Spot 228 | 5030090  | 6389471  | 25374.0   | 2.9  | 13.9 | 0.9 | 1.0 | 2.3 | 0.1 | 2.1 | 0.924236359 | 617.4  | 12.4 | 702.7  | 11.6 | 986.3  | 17.7  | 37.4    |
| Spot 229 | 7701644  | 9783014  | 68611.8   | 1.3  | 19.5 | 1.6 | 0.3 | 3.9 | 0.0 | 3.5 | 0.908608454 | 232.8  | 8.1  | 236.0  | 8.2  | 267.7  | 37.2  | 13.0    |
| Spot 230 | 1271299  | 1614867  | 69940.9   | 3.3  | 12.1 | 1.0 | 2.4 | 1.6 | 0.2 | 1.3 | 0.790134766 | 1227.4 | 14.4 | 1242.8 | 11.7 | 1269.5 | 19.5  | 3.3     |
| Spot 231 | 7062542  | 8971195  | 6146.6    | 2.3  | 19.5 | 0.9 | 0.3 | 1.8 | 0.0 | 1.6 | 0.878376061 | 257.2  | 4.0  | 248.7  | 4.0  | 168.9  | 20.3  | -52.2   |
| Spot 232 | 2631846  | 3343102  | 5919.3    | 2.0  | 17.7 | 1.3 | 0.5 | 1.8 | 0.1 | 1.3 | 0.704496158 | 456.1  | 5.5  | 444.9  | 6.4  | 387.3  | 28.5  | -17.7   |
| Spot 233 | 1228248  | 1560182  | 13682.6   | 3.6  | 11.9 | 0.9 | 2.5 | 1.9 | 0.2 | 1.6 | 0.862816818 | 1259.5 | 18.7 | 1270.6 | 13.7 | 1289.2 | 18.6  | 2.3     |
| Spot 235 | 1409617  | 1790566  | 3528.7    | 0.8  | 19.8 | 2.2 | 0.2 | 2.9 | 0.0 | 1.8 | 0.602079603 | 177.9  | 3.1  | 168.1  | 4.5  | 32.3   | NA    | -451.2  |
| Spot 237 | 2816540  | 3577710  | 23214.8   | 8.3  | 18.8 | 2.2 | 0.3 | 2.7 | 0.0 | 1.4 | 0.536638061 | 232.8  | 3.3  | 242.3  | 5.7  | 335.3  | 50.8  | 30.6    |
| Spot 238 | 10787082 | 13702291 | 45910.0   | 46.1 | 13.4 | 0.8 | 1.7 | 1.5 | 0.2 | 1.3 | 0.840124923 | 999.8  | 11.7 | 1024.0 | 9.7  | 1075.9 | 16.3  | 7.1     |
| Spot 239 | 813015   | 1032732  | 7234.8    | 2.8  | 14.4 | 1.6 | 1.4 | 2.5 | 0.2 | 1.6 | 0.632050349 | 901.4  | 13.5 | 892.8  | 15.1 | 871.4  | 40.8  | -3.4    |
| Spot 240 | 6592895  | 8374626  | 35168.6   | 2.4  | 11.5 | 1.1 | 2.6 | 2.3 | 0.2 | 2.0 | 0.871085418 | 1284.2 | 22.9 | 1314.2 | 16.7 | 1363.5 | 21.4  | 5.8     |
| Spot 241 | 1790935  | 2274935  | 33143.7   | 6.5  | 13.0 | 1.1 | 2.0 | 2.0 | 0.2 | 1.7 | 0.844771963 | 1116.5 | 17.1 | 1118.6 | 13.4 | 1122.6 | 21.1  | 0.5     |
| Spot 242 | 5813882  | 7385084  | 32129.2   | 2.2  | 18.5 | 1.8 | 0.4 | 2.1 | 0.0 | 1.2 | 0.5704771   | 304.7  | 3.6  | 314.1  | 5.8  | 384.3  | 39.6  | 20.7    |
| Spot 244 | 9019760  | 11457351 | 199416.2  | 2.8  | 14.0 | 0.9 | 1.7 | 1.5 | 0.2 | 1.3 | 0.828659031 | 1016.6 | 11.9 | 1006.5 | 9.7  | 984.7  | 17.3  | -3.2    |
| Spot 245 | 5205930  | 6612833  | 346652.7  | 4.5  | 12.7 | 0.7 | 2.0 | 1.6 | 0.2 | 1.4 | 0.897500971 | 1076.5 | 14.2 | 1113.8 | 10.8 | 1187.4 | 13.9  | 9.3     |
| Spot 247 | 1456007  | 1849493  | 39723.0   | 1.6  | 17.4 | 3.3 | 0.3 | 5.4 | 0.0 | 4.2 | 0.786123604 | 261.3  | 10.9 | 288.6  | 13.6 | 516.0  | 73.3  | 49.4    |
| Spot 248 | 526349   | 668595   | 4133.6    | 3.9  | 16.8 | 3.1 | 0.5 | 4.7 | 0.1 | 3.1 | 0.665560712 | 424.4  | 12.9 | 431.2  | 16.6 | 467.3  | 78.0  | 9.2     |
| Spot 249 | 3685878  | 4681987  | 41509.7   | 4.7  | 8.4  | 0.9 | 5.2 | 1.9 | 0.3 | 1.7 | 0.883730965 | 1776.7 | 26.2 | 1858.8 | 16.3 | 1951.8 | 16.0  | 9.0     |
| Spot 250 | 2060868  | 2617818  | 3874.1    | 0.6  | 19.3 | 2.2 | 0.2 | 5.1 | 0.0 | 2.3 | 0.454909234 | 178.4  | 4.1  | 174.4  | 8.2  | 120.7  | 106.9 | -47.8   |
| Spot 251 | 544365   | 691480   | 33642.7   | 2.0  | 7.6  | 1.1 | 6.7 | 2.5 | 0.4 | 2.3 | 0.896053092 | 2008.3 | 39.4 | 2066.1 | 22.5 | 2124.2 | 19.8  | 5.5     |

|          |          |          |          |      |      |     |     |     |     |     |             |        |      |        |      |        |      |        |
|----------|----------|----------|----------|------|------|-----|-----|-----|-----|-----|-------------|--------|------|--------|------|--------|------|--------|
| Spot 253 | 9666921  | 12279407 | 33158.9  | 77.7 | 19.4 | 1.1 | 0.3 | 1.8 | 0.0 | 1.4 | 0.795973806 | 239.3  | 3.3  | 241.3  | 3.8  | 261.4  | 24.5 | 8.5    |
| Spot 254 | 2329327  | 2958828  | 17170.9  | 2.8  | 12.3 | 1.0 | 2.2 | 1.7 | 0.2 | 1.4 | 0.814746678 | 1180.7 | 14.9 | 1196.5 | 11.9 | 1225.1 | 19.3 | 3.6    |
| Spot 255 | 3839252  | 4876810  | 256951.8 | 1.8  | 11.1 | 1.1 | 3.0 | 1.8 | 0.2 | 1.4 | 0.783061335 | 1396.6 | 17.4 | 1412.8 | 13.5 | 1437.3 | 21.0 | 2.8    |
| Spot 256 | 5074812  | 6446280  | 413705.7 | 8.7  | 13.6 | 1.0 | 1.7 | 2.0 | 0.2 | 1.7 | 0.850051806 | 980.5  | 15.2 | 996.3  | 12.5 | 1031.4 | 21.0 | 4.9    |
| Spot 257 | 3413811  | 4336393  | 35286.5  | 6.1  | 11.1 | 1.0 | 3.1 | 1.9 | 0.2 | 1.6 | 0.859642241 | 1438.5 | 21.0 | 1437.9 | 14.6 | 1437.0 | 18.4 | -0.1   |
| Spot 258 | 1336059  | 1697129  | 19537.0  | 5.2  | 13.8 | 1.1 | 1.6 | 2.2 | 0.2 | 2.0 | 0.872582263 | 979.1  | 17.8 | 980.5  | 14.1 | 983.5  | 22.3 | 0.4    |
| Spot 261 | 2302992  | 2925376  | 14776.3  | 1.6  | 17.9 | 2.1 | 0.3 | 2.7 | 0.0 | 1.7 | 0.633509759 | 271.1  | 4.6  | 286.4  | 6.8  | 413.3  | 47.0 | 34.4   |
| Spot 262 | 1580272  | 2007340  | 14074.4  | 4.1  | 12.6 | 1.0 | 2.1 | 1.7 | 0.2 | 1.4 | 0.795955237 | 1134.9 | 14.2 | 1143.8 | 11.8 | 1160.7 | 20.6 | 2.2    |
| Spot 263 | 4061963  | 5159709  | 35504.4  | 9.3  | 19.4 | 1.3 | 0.3 | 2.1 | 0.0 | 1.7 | 0.808798145 | 229.1  | 3.9  | 232.0  | 4.4  | 260.8  | 28.8 | 12.2   |
| Spot 264 | 1517311  | 1927364  | 20076.6  | 5.1  | 10.7 | 1.5 | 3.2 | 2.2 | 0.2 | 1.6 | 0.716157065 | 1426.6 | 20.2 | 1452.7 | 17.1 | 1491.1 | 29.2 | 4.3    |
| Spot 265 | 957930   | 1216811  | 35610.7  | 9.8  | 13.0 | 1.0 | 2.0 | 1.8 | 0.2 | 1.4 | 0.813301092 | 1125.7 | 14.8 | 1124.0 | 12.0 | 1120.7 | 20.5 | -0.4   |
| Spot 266 | 9287926  | 11797988 | 30015.6  | 1.0  | 17.1 | 1.2 | 0.4 | 4.2 | 0.1 | 4.0 | 0.957673122 | 334.4  | 13.1 | 361.0  | 12.7 | 535.6  | 26.4 | 37.6   |
| Spot 267 | 2412911  | 3065001  | 7640.8   | 1.9  | 20.1 | 2.0 | 0.2 | 3.0 | 0.0 | 1.8 | 0.602946044 | 235.7  | 4.2  | 223.3  | 6.0  | 94.8   | 57.0 | -148.7 |
| Spot 268 | 443148   | 562909   | 16246.6  | 0.9  | 12.7 | 1.9 | 2.1 | 2.7 | 0.2 | 2.0 | 0.717489619 | 1149.6 | 20.7 | 1148.4 | 18.8 | 1146.0 | 37.9 | -0.3   |
| Spot 269 | 1914468  | 2431853  | 11515.3  | 2.6  | 17.2 | 1.1 | 0.6 | 1.7 | 0.1 | 1.2 | 0.691067115 | 490.2  | 5.6  | 491.0  | 6.6  | 494.6  | 27.2 | 0.9    |
| Spot 275 | 1399402  | 1777590  | 53994.8  | 2.9  | 12.6 | 1.4 | 2.2 | 1.9 | 0.2 | 1.3 | 0.6744345   | 1178.8 | 14.2 | 1180.4 | 13.6 | 1183.2 | 28.4 | 0.4    |
| Spot 276 | 4445148  | 5646450  | 7311.6   | 9.7  | 19.1 | 1.2 | 0.3 | 1.9 | 0.0 | 1.4 | 0.755160983 | 271.0  | 3.8  | 266.3  | 4.4  | 225.1  | 28.4 | -20.4  |
| Spot 277 | 12078296 | 15342456 | 17717.0  | 0.7  | 20.3 | 1.4 | 0.2 | 2.3 | 0.0 | 1.7 | 0.749536541 | 153.3  | 2.6  | 152.3  | 3.2  | 136.4  | 35.2 | -12.4  |
| Spot 278 | 2032370  | 2581618  | 40988.6  | 2.1  | 10.5 | 0.8 | 3.5 | 1.7 | 0.3 | 1.5 | 0.872155488 | 1502.2 | 20.0 | 1516.1 | 13.5 | 1535.6 | 15.8 | 2.2    |
| Spot 279 | 3106409  | 3945916  | 43435.1  | 2.3  | 17.4 | 0.9 | 0.7 | 2.0 | 0.1 | 1.8 | 0.893520696 | 518.8  | 9.1  | 517.2  | 8.3  | 510.0  | 20.2 | -1.7   |
| Spot 280 | 8049380  | 10224726 | 4790.6   | 1.4  | 18.2 | 2.5 | 0.2 | 4.0 | 0.0 | 2.6 | 0.64295427  | 152.9  | 3.9  | 161.8  | 6.1  | 294.8  | 70.8 | 48.1   |
| Spot 281 | 3763176  | 4780175  | 43098.9  | 3.9  | 12.3 | 5.0 | 0.7 | 5.8 | 0.1 | 2.9 | 0.498582288 | 402.2  | 11.3 | 551.5  | 24.7 | 1227.9 | 98.8 | 67.2   |
| Spot 282 | 5036450  | 6397551  | 38460.2  | 5.7  | 12.3 | 0.7 | 2.1 | 1.7 | 0.2 | 1.5 | 0.915705991 | 1121.0 | 15.8 | 1161.0 | 11.6 | 1236.4 | 13.2 | 9.3    |
| Spot 283 | 5764016  | 7321742  | 679155.5 | 2.3  | 11.8 | 0.8 | 2.6 | 1.9 | 0.2 | 1.7 | 0.915308667 | 1277.0 | 20.2 | 1292.3 | 13.9 | 1317.7 | 14.9 | 3.1    |
| Spot 285 | 1108060  | 1407513  | 16221.1  | 1.0  | 16.9 | 1.3 | 0.8 | 2.0 | 0.1 | 1.3 | 0.678336528 | 598.3  | 7.6  | 588.8  | 8.8  | 552.4  | 31.4 | -8.3   |
| Spot 286 | 2856659  | 3628671  | 6171.0   | 9.3  | 17.0 | 1.2 | 0.7 | 2.4 | 0.1 | 2.1 | 0.877021782 | 533.7  | 10.9 | 525.0  | 9.9  | 487.1  | 25.7 | -9.6   |
| Spot 287 | 2962748  | 3763431  | 38171.7  | 2.4  | 17.5 | 1.4 | 0.5 | 1.9 | 0.1 | 1.3 | 0.661875795 | 401.9  | 5.0  | 416.3  | 6.6  | 497.0  | 31.8 | 19.1   |
| Spot 288 | 9999865  | 12702330 | 57913.7  | 5.8  | 14.2 | 0.7 | 1.6 | 1.4 | 0.2 | 1.2 | 0.864402488 | 987.4  | 11.4 | 974.4  | 9.0  | 945.0  | 14.8 | -4.5   |
| Spot 289 | 5359970  | 6808502  | 46074.5  | 2.2  | 13.7 | 0.6 | 1.6 | 1.5 | 0.2 | 1.3 | 0.905695265 | 963.4  | 12.1 | 982.1  | 9.4  | 1024.2 | 12.8 | 5.9    |
| Spot 290 | 3350176  | 4255562  | 4856.1   | 1.1  | 18.6 | 1.4 | 0.3 | 2.2 | 0.0 | 1.6 | 0.710588162 | 259.5  | 4.0  | 258.1  | 5.0  | 245.5  | 35.5 | -5.7   |
| Spot 291 | 549678   | 698229   | 11869.6  | 3.6  | 12.6 | 1.3 | 2.0 | 1.9 | 0.2 | 1.4 | 0.711800851 | 1101.3 | 13.8 | 1122.1 | 13.0 | 1162.6 | 26.6 | 5.3    |
| Spot 292 | 2932797  | 3725386  | 40622.1  | 4.9  | 12.2 | 0.7 | 2.4 | 1.6 | 0.2 | 1.5 | 0.892069924 | 1240.6 | 16.5 | 1244.7 | 11.7 | 1251.7 | 14.5 | 0.9    |
| Spot 293 | 4167185  | 5293367  | 10297.9  | 2.8  | 16.0 | 2.8 | 0.4 | 3.2 | 0.0 | 1.6 | 0.49270762  | 261.7  | 4.1  | 305.6  | 8.6  | 655.7  | 60.5 | 60.1   |
| Spot 294 | 941782   | 1196299  | 6999.8   | 4.2  | 13.7 | 0.8 | 1.6 | 2.0 | 0.2 | 1.4 | 0.693713903 | 993.8  | 12.7 | 985.4  | 12.5 | 966.5  | 29.1 | -2.8   |
| Spot 295 | 3290468  | 4179717  | 26722.7  | 4.6  | 12.5 | 0.7 | 2.3 | 1.5 | 0.2 | 1.3 | 0.885742144 | 1225.9 | 14.8 | 1214.0 | 10.6 | 1192.7 | 13.7 | -2.8   |
| Spot 296 | 4197259  | 5331568  | 74113.8  | 2.3  | 13.2 | 0.8 | 1.7 | 1.7 | 0.2 | 1.5 | 0.891753539 | 966.9  | 13.5 | 1006.5 | 10.8 | 1093.8 | 15.3 | 11.6   |
| Spot 297 | 6912849  | 8781047  | 73400.6  | 5.6  | 12.0 | 0.8 | 2.6 | 2.2 | 0.2 | 2.0 | 0.93672786  | 1300.0 | 23.9 | 1291.9 | 15.8 | 1278.6 | 14.7 | -1.7   |
| Spot 298 | 3079784  | 3912096  | 24045.8  | 1.8  | 17.6 | 0.8 | 0.6 | 1.5 | 0.1 | 1.3 | 0.836995258 | 482.4  | 6.0  | 480.3  | 5.9  | 470.3  | 18.7 | -2.6   |
| Spot 299 | 6741950  | 8563963  | 25079.5  | 3.3  | 19.4 | 1.2 | 0.3 | 1.8 | 0.0 | 1.3 | 0.742732146 | 257.3  | 3.3  | 257.7  | 4.0  | 260.6  | 27.1 | 1.2    |
| Spot 300 | 791633   | 1005572  | 8263.9   | 2.8  | 13.4 | 0.8 | 1.8 | 1.4 | 0.2 | 1.1 | 0.770072217 | 1047.0 | 10.2 | 1041.1 | 8.9  | 1028.8 | 17.7 | -1.8   |
| Spot 302 | 5334523  | 6776178  | 205778.4 | 2.6  | 12.6 | 0.8 | 2.1 | 1.5 | 0.2 | 1.3 | 0.871816739 | 1119.1 | 13.8 | 1144.7 | 10.6 | 1193.6 | 14.9 | 6.2    |
| Spot 303 | 9657133  | 12266974 | 106189.8 | 63.2 | 13.1 | 1.0 | 1.7 | 2.0 | 0.2 | 1.7 | 0.866678072 | 956.2  | 15.5 | 1006.6 | 12.9 | 1118.0 | 20.1 | 14.5   |
| Spot 304 | 757383   | 962066   | 9002.7   | 5.2  | 14.3 | 1.4 | 1.4 | 2.1 | 0.2 | 1.2 | 0.589706805 | 905.8  | 10.5 | 900.3  | 12.6 | 886.8  | 35.1 | -2.2   |

|                                    |          |          |          |      |       |      |      |      |     |      |             |        |       |        |       |        |       |        |
|------------------------------------|----------|----------|----------|------|-------|------|------|------|-----|------|-------------|--------|-------|--------|-------|--------|-------|--------|
| Spot 306                           | 1279931  | 1625833  | 8439.4   | 3.0  | 12.4  | 2.5  | 2.3  | 3.9  | 0.2 | 3.0  | 0.771889993 | 1232.7 | 33.5  | 1219.1 | 27.4  | 1195.2 | 48.5  | -3.1   |
| Spot 307                           | 266284   | 338247   | 10521.2  | 1.8  | 17.8  | 5.4  | 0.3  | 6.5  | 0.0 | 3.5  | 0.541089391 | 278.4  | 9.5   | 294.6  | 16.5  | 425.3  | 121.1 | 34.5   |
| Spot 308                           | 1615660  | 2052292  | 26514.1  | 3.4  | 14.4  | 0.9  | 1.5  | 1.4  | 0.2 | 1.0  | 0.76412251  | 925.8  | 9.0   | 924.3  | 8.2   | 920.8  | 18.0  | -0.5   |
| Spot 309                           | 348166   | 442258   | 28766.1  | 2.4  | 13.1  | 4.2  | 2.0  | 7.3  | 0.2 | 5.9  | 0.814532183 | 1119.6 | 60.7  | 1113.8 | 49.1  | 1102.4 | 84.2  | -1.6   |
| Spot 312                           | 2506300  | 3183628  | 4180.6   | 1.0  | 19.2  | 1.2  | 0.3  | 2.5  | 0.0 | 1.9  | 0.774758793 | 266.5  | 5.0   | 255.1  | 5.5   | 151.9  | 36.3  | -75.4  |
| Spot 313                           | 1887667  | 2397809  | 6485.9   | 1.8  | 19.5  | 1.4  | 0.3  | 2.3  | 0.0 | 1.8  | 0.781345906 | 284.3  | 5.1   | 272.2  | 5.6   | 170.0  | 33.9  | -67.3  |
| Spot 315                           | 2668115  | 3389174  | 16024.4  | 2.0  | 18.9  | 1.6  | 0.3  | 2.3  | 0.0 | 1.6  | 0.709811503 | 274.7  | 4.4   | 277.7  | 5.6   | 302.8  | 36.9  | 9.3    |
| <b>Run 1 NM&amp;A (discordant)</b> |          |          |          |      |       |      |      |      |     |      |             |        |       |        |       |        |       |        |
| Spot 107                           | 320765   | 407452   | 386.5    | 1.6  | 73.6  | 20.4 | 0.1  | 20.6 | 0.0 | 2.9  | 0.138089608 | 176.5  | 5.0   | 51.5   | 10.4  | NA     | NA    |        |
| Spot 116                           | 11759491 | 14937494 | 279555.5 | 29.3 | 12.4  | 1.0  | 1.7  | 3.0  | 0.2 | 2.8  | 0.942040912 | 917.2  | 23.9  | 1008.7 | 19.0  | 1213.1 | 19.6  | 24.4   |
| Spot 120                           | 126835   | 161113   | 1443.5   | 9.4  | 14.0  | 3.1  | 1.9  | 3.8  | 0.2 | 2.1  | 0.556920323 | 1145.0 | 22.0  | 1084.6 | 25.2  | 965.3  | 64.0  | -18.6  |
| Spot 124                           | 167995   | 213396   | 1124.7   | 4.2  | 16.4  | 8.6  | 1.2  | 9.2  | 0.1 | 3.3  | 0.358311434 | 851.4  | 26.2  | 796.0  | 50.6  | 643.8  | 184.3 | -32.3  |
| Spot 129                           | 780984   | 992045   | 2728.6   | 1.2  | 11.2  | 4.5  | 2.2  | 4.7  | 0.2 | 1.3  | 0.268121465 | 1050.9 | 12.3  | 1174.2 | 32.8  | 1409.1 | 87.0  | 25.4   |
| Spot 138                           | 1270129  | 1613382  | 27815.8  | 8.7  | 16.7  | 3.1  | 2.1  | 27.3 | 0.3 | 27.1 | 0.993527419 | 1480.3 | 358.8 | 1158.4 | 190.7 | 597.3  | 67.1  | -147.8 |
| Spot 139                           | 1261267  | 1602125  | 39460.4  | 5.3  | 9.2   | 1.6  | 2.9  | 2.1  | 0.2 | 1.4  | 0.669722027 | 1153.2 | 15.2  | 1392.0 | 16.2  | 1779.4 | 29.0  | 35.2   |
| Spot 14                            | 7994643  | 10155196 | 49427.5  | 32.9 | 12.5  | 1.1  | 1.8  | 1.9  | 0.2 | 1.6  | 0.825066365 | 961.0  | 14.3  | 1037.7 | 12.6  | 1203.0 | 21.6  | 20.1   |
| Spot 142                           | 7798954  | 9906621  | 29197.3  | 9.8  | 12.8  | 0.9  | 1.4  | 1.8  | 0.1 | 1.5  | 0.85055888  | 799.1  | 11.4  | 897.3  | 10.6  | 1147.6 | 18.6  | 30.4   |
| Spot 145                           | 489091   | 621268   | 2313.2   | 2.2  | 33.3  | 3.9  | 0.3  | 30.3 | 0.1 | 30.0 | 0.991639959 | 427.3  | 124.0 | 253.7  | 68.0  | NA     | NA    |        |
| Spot 153                           | 763948   | 970405   | 4323.2   | 4.7  | 14.9  | 1.0  | 1.4  | 1.7  | 0.2 | 1.3  | 0.793186844 | 925.0  | 11.3  | 900.6  | 9.9   | 841.1  | 21.0  | -10.0  |
| Spot 155                           | 1593312  | 2023905  | 8894.3   | 3.1  | 14.9  | 1.0  | 1.4  | 1.6  | 0.2 | 1.2  | 0.757929558 | 934.1  | 10.6  | 907.2  | 9.6   | 842.2  | 21.8  | -10.9  |
| Spot 169                           | 343669   | 436545   | 2340.8   | 2.7  | 15.7  | 2.1  | 1.3  | 2.9  | 0.1 | 2.0  | 0.685658089 | 899.8  | 16.6  | 851.3  | 16.6  | 727.0  | 44.5  | -23.8  |
| Spot 174                           | 1314173  | 1669328  | 35140.1  | 2.9  | 23.6  | 1.9  | 1.0  | 30.1 | 0.2 | 30.0 | 0.997998819 | 1024.2 | 284.3 | 707.2  | 154.3 | NA     | NA    |        |
| Spot 176                           | 5080062  | 6452949  | 35372.2  | 1.3  | 10.2  | 0.9  | 2.5  | 1.8  | 0.2 | 1.6  | 0.858029536 | 1084.9 | 15.5  | 1264.3 | 13.1  | 1583.8 | 17.4  | 31.5   |
| Spot 180                           | 5758203  | 7314358  | 33681.1  | 9.6  | 12.2  | 0.8  | 2.6  | 2.1  | 0.2 | 1.9  | 0.931410852 | 1321.6 | 23.1  | 1291.0 | 15.2  | 1240.5 | 14.8  | -6.5   |
| Spot 183                           | 328439   | 417199   | 462.0    | 1.2  | 43.7  | 21.7 | 0.1  | 22.0 | 0.0 | 3.6  | 0.163329473 | 216.7  | 7.6   | 104.0  | 21.7  | NA     | NA    |        |
| Spot 185                           | 1210427  | 1537545  | 14118.5  | 2.1  | 13.1  | 1.0  | 2.2  | 1.7  | 0.2 | 1.4  | 0.826481657 | 1219.1 | 16.0  | 1176.2 | 12.1  | 1098.1 | 19.6  | -11.0  |
| Spot 188                           | 1063770  | 1351254  | 4360.7   | 1.4  | 24.3  | 2.8  | 0.2  | 18.2 | 0.0 | 18.0 | 0.988146524 | 253.6  | 44.8  | 208.4  | 34.4  | NA     | NA    |        |
| Spot 208                           | 534330   | 678733   | 356.1    | 2.2  | 145.9 | 8.5  | 0.0  | 9.4  | 0.0 | 3.8  | 0.410314501 | 166.4  | 6.3   | 24.8   | 2.3   | NA     | NA    |        |
| Spot 21                            | 19840320 | 25202168 | 145143.1 | 15.3 | 12.7  | 0.9  | 1.7  | 1.4  | 0.2 | 1.1  | 0.790300174 | 922.3  | 9.5   | 996.4  | 8.8   | 1163.2 | 16.9  | 20.7   |
| Spot 212                           | 3530870  | 4485088  | 13309.9  | 3.8  | 21.3  | 3.7  | 0.1  | 30.2 | 0.0 | 30.0 | 0.992616125 | 86.8   | 25.9  | 85.4   | 24.8  | 45.8   | NA    | -89.6  |
| Spot 216                           | 1        | 1        | 1000.0   | 0.8  | 5.2   | 1.0  | 26.4 | 1.2  | 1.0 | 0.6  | 0.514146551 | 4445.5 | 19.3  | 3360.9 | 11.4  | 2765.6 | 16.4  | -60.7  |
| Spot 234                           | 1778345  | 2258943  | 9573.9   | 0.7  | 20.5  | 2.7  | 0.2  | 7.2  | 0.0 | 6.6  | 0.928703844 | 200.2  | 13.1  | 195.3  | 12.7  | 137.0  | 62.3  | -46.1  |
| Spot 236                           | 1357441  | 1724290  | 6911.9   | 3.5  | 13.0  | 0.9  | 2.1  | 1.5  | 0.2 | 1.2  | 0.773428252 | 1185.9 | 12.5  | 1164.4 | 10.4  | 1124.5 | 18.9  | -5.5   |
| Spot 243                           | 432482   | 549361   | 2427.2   | 3.5  | 14.8  | 2.1  | 1.5  | 2.9  | 0.2 | 2.0  | 0.69974346  | 983.6  | 18.4  | 945.6  | 17.7  | 858.1  | 42.8  | -14.6  |
| Spot 246                           | 323647   | 411113   | 5959.2   | 2.2  | 13.1  | 1.6  | 2.1  | 2.2  | 0.2 | 1.4  | 0.656348944 | 1184.8 | 15.4  | 1156.5 | 15.0  | 1103.7 | 32.7  | -7.3   |
| Spot 252                           | 7466584  | 9484428  | 56829.8  | 13.3 | 12.2  | 1.4  | 1.6  | 2.1  | 0.1 | 1.6  | 0.752902823 | 844.0  | 12.3  | 960.9  | 12.8  | 1238.9 | 26.7  | 31.9   |
| Spot 259                           | 758565   | 963568   | 2421.0   | 2.0  | 36.8  | 11.8 | 0.2  | 32.2 | 0.1 | 30.0 | 0.930403714 | 343.7  | 100.4 | 189.7  | 55.8  | NA     | NA    |        |
| Spot 260                           | 521672   | 662654   | 587.3    | 1.1  | 49.5  | 65.7 | 0.1  | 65.8 | 0.0 | 2.8  | 0.042454548 | 191.1  | 5.3   | 81.6   | 51.6  | NA     | NA    |        |
| Spot 270                           | 615966   | 782431   | 2102.5   | 3.2  | 38.1  | 4.3  | 0.2  | 30.3 | 0.1 | 30.0 | 0.99002259  | 377.8  | 110.1 | 200.4  | 55.2  | NA     | NA    |        |
| Spot 271                           | 74856    | 95085    | 2627.7   | 3.6  | 14.3  | 7.3  | 1.5  | 10.1 | 0.2 | 7.0  | 0.692353897 | 919.4  | 59.7  | 921.8  | 61.0  | 927.3  | 149.3 | 0.9    |
| Spot 272                           | 1922012  | 2441436  | 9727.8   | 2.0  | 21.6  | 4.0  | 0.1  | 12.8 | 0.0 | 12.1 | 0.949604272 | 79.8   | 9.6   | 77.6   | 9.5   | 10.5   | NA    | -662.5 |
| Spot 273                           | 469187   | 595985   | 2691.3   | 1.4  | 15.7  | 2.6  | 1.2  | 3.1  | 0.1 | 1.5  | 0.504219112 | 840.3  | 12.2  | 812.1  | 17.1  | 735.5  | 56.0  | -14.2  |
| Spot 274                           | 6305121  | 8009080  | 530737.4 | 7.1  | 9.7   | 1.7  | 2.6  | 2.4  | 0.2 | 1.7  | 0.699022827 | 1096.6 | 17.2  | 1310.1 | 18.0  | 1679.0 | 32.3  | 34.7   |

|              |         |          |          |      |      |     |     |      |     |      |             |        |      |        |      |        |       |        |
|--------------|---------|----------|----------|------|------|-----|-----|------|-----|------|-------------|--------|------|--------|------|--------|-------|--------|
| Spot 284     | 2762276 | 3508782  | 5561.9   | 3.1  | 20.0 | 4.8 | 0.1 | 9.2  | 0.0 | 7.8  | 0.854506827 | 78.7   | 6.1  | 82.5   | 7.3  | 193.7  | 110.7 | 59.4   |
| Spot 30      | 444788  | 564992   | 3085.4   | 3.1  | 15.4 | 1.4 | 1.4 | 2.0  | 0.2 | 1.4  | 0.694317809 | 930.8  | 12.0 | 885.5  | 11.8 | 774.0  | 30.1  | -20.3  |
| Spot 301     | 2547985 | 3236578  | 17665.3  | 12.2 | 13.6 | 0.8 | 1.9 | 1.3  | 0.2 | 1.0  | 0.75665171  | 1094.5 | 9.8  | 1074.6 | 8.6  | 1034.3 | 17.1  | -5.8   |
| Spot 305     | 535502  | 680221   | 2690.8   | 3.7  | 15.1 | 1.5 | 1.4 | 2.3  | 0.2 | 1.7  | 0.744686072 | 911.7  | 14.3 | 883.3  | 13.4 | 812.9  | 31.6  | -12.2  |
| Spot 310     | 437243  | 555408   | 2665.4   | 4.7  | 15.2 | 4.4 | 1.4 | 4.6  | 0.2 | 1.3  | 0.279170871 | 909.4  | 11.0 | 876.9  | 27.2 | 795.7  | 93.2  | -14.3  |
| Spot 311     | 3266474 | 4149239  | 130966.7 | 5.6  | 12.4 | 1.0 | 2.4 | 2.1  | 0.2 | 1.9  | 0.875769039 | 1279.0 | 21.5 | 1253.7 | 15.3 | 1210.6 | 20.1  | -5.6   |
| Spot 314     | 9387215 | 11924110 | 67186.6  | 19.8 | 14.3 | 0.7 | 1.6 | 1.4  | 0.2 | 1.2  | 0.871014821 | 1002.6 | 11.2 | 979.4  | 8.7  | 927.9  | 14.0  | -8.1   |
| Spot 34      | 4159307 | 5283360  | 10590.7  | 5.2  | 21.2 | 1.9 | 0.3 | 6.7  | 0.0 | 6.4  | 0.960814455 | 248.6  | 15.7 | 230.7  | 13.8 | 52.0   | 44.3  | -377.9 |
| Spot 4       | 102708  | 130465   | 1411.3   | 3.3  | 15.1 | 8.4 | 1.6 | 9.1  | 0.2 | 3.3  | 0.368179188 | 1062.3 | 32.8 | 982.8  | 57.3 | 809.3  | 177.1 | -31.3  |
| Spot 41      | 255835  | 324975   | 2012.4   | 0.5  | 5.3  | 5.6 | 1.1 | 8.9  | 0.0 | 6.9  | 0.772572503 | 276.5  | 18.5 | 776.6  | 48.2 | 2743.1 | 92.7  | 89.9   |
| Spot 43      | 1012479 | 1286102  | 2310.9   | 3.5  | 12.1 | 9.3 | 0.2 | 15.4 | 0.0 | 12.3 | 0.798119262 | 111.3  | 13.5 | 184.3  | 25.9 | 1266.8 | 181.3 | 91.2   |
| Spot 47      | 376911  | 478771   | 5029.1   | 2.2  | 13.6 | 4.1 | 2.0 | 5.8  | 0.2 | 4.1  | 0.708924665 | 1179.2 | 44.5 | 1128.4 | 39.7 | 1031.9 | 83.0  | -14.3  |
| Spot 5       | 743769  | 944773   | 6173.3   | 5.0  | 13.1 | 1.1 | 1.5 | 1.7  | 0.1 | 1.3  | 0.762918561 | 857.5  | 10.6 | 927.4  | 10.5 | 1097.4 | 22.3  | 21.9   |
| Spot 52      | 2124859 | 2699103  | 179317.0 | 3.1  | 8.2  | 0.9 | 4.2 | 2.4  | 0.2 | 2.2  | 0.923158027 | 1431.1 | 28.7 | 1674.7 | 19.9 | 1995.0 | 16.6  | 28.3   |
| Spot 54      | 7532565 | 9568241  | 302134.2 | 10.9 | 7.9  | 2.7 | 3.4 | 3.2  | 0.2 | 1.7  | 0.534866094 | 1163.9 | 18.3 | 1514.3 | 25.3 | 2045.7 | 48.0  | 43.1   |
| Spot 59      | 1985097 | 2521570  | 600623.7 | 2.5  | 15.2 | 3.0 | 1.5 | 8.6  | 0.2 | 8.0  | 0.935451297 | 970.1  | 72.2 | 920.3  | 51.9 | 802.5  | 63.5  | -20.9  |
| Spot 74      | 1118048 | 1420201  | 24963.2  | 1.2  | 18.2 | 3.1 | 0.7 | 12.8 | 0.1 | 12.4 | 0.969843546 | 608.5  | 72.0 | 567.8  | 55.6 | 407.9  | 69.7  | -49.2  |
| Spot 82      | 3970370 | 5043363  | 35580.2  | 1.4  | 30.3 | 1.5 | 0.2 | 30.0 | 0.0 | 30.0 | 0.998781951 | 269.3  | 79.1 | 180.3  | 49.7 | NA     | NA    |        |
| Spot 91      | 576061  | 731742   | 10198.4  | 3.6  | 14.3 | 1.8 | 1.6 | 2.8  | 0.2 | 2.1  | 0.771302856 | 977.8  | 19.4 | 960.4  | 17.2 | 920.7  | 36.3  | -6.2   |
| Spot 95      | 710574  | 902606   | 3243.3   | 1.8  | 14.0 | 1.0 | 1.8 | 1.6  | 0.2 | 1.3  | 0.805886923 | 1055.0 | 12.8 | 1027.8 | 10.5 | 970.3  | 19.7  | -8.7   |
| <b>Run 2</b> |         |          |          |      |      |     |     |      |     |      |             |        |      |        |      |        |       |        |
| Spot 2       | 2249609 | 1801391  | 4980.5   | 0.9  | 19.3 | 1.6 | 0.3 | 2.6  | 0.0 | 2.1  | 0.779794433 | 258.8  | 5.2  | 246.6  | 5.8  | 131.3  | 38.9  | -97.1  |
| Spot 3       | 1781509 | 1426556  | 31585.6  | 3.5  | 12.5 | 1.3 | 2.1 | 2.0  | 0.2 | 1.5  | 0.745129072 | 1145.9 | 15.8 | 1158.9 | 14.0 | 1183.3 | 26.6  | 3.2    |
| Spot 4       | 3012419 | 2412216  | 7845.2   | 1.1  | 17.0 | 4.6 | 0.1 | 5.5  | 0.0 | 2.7  | 0.485531368 | 69.8   | 1.9  | 82.9   | 4.4  | 479.5  | 106.7 | 85.4   |
| Spot 5       | 1976334 | 1582564  | 628301.4 | 2.4  | 13.1 | 0.7 | 1.9 | 1.8  | 0.2 | 1.6  | 0.926389511 | 1063.6 | 16.0 | 1076.6 | 11.7 | 1103.1 | 13.2  | 3.6    |
| Spot 6       | 1313257 | 1051600  | 20255.5  | 2.8  | 16.0 | 4.8 | 0.4 | 6.2  | 0.0 | 4.0  | 0.638786023 | 284.6  | 11.1 | 330.6  | 17.6 | 668.0  | 102.7 | 57.4   |
| Spot 7       | 3553393 | 2845405  | 79084.6  | 3.2  | 13.0 | 0.8 | 1.8 | 1.8  | 0.2 | 1.6  | 0.892072532 | 1027.5 | 15.0 | 1056.6 | 11.6 | 1117.3 | 15.9  | 8.0    |
| Spot 8       | 778407  | 623315   | 4950.1   | 2.1  | 12.3 | 1.7 | 2.2 | 2.1  | 0.2 | 1.3  | 0.605656981 | 1204.4 | 14.2 | 1186.2 | 15.0 | 1153.2 | 33.8  | -4.4   |
| Spot 9       | 7169075 | 5740689  | 128810.6 | 7.5  | 12.6 | 1.1 | 2.1 | 2.3  | 0.2 | 2.0  | 0.870032979 | 1116.4 | 20.5 | 1145.1 | 15.8 | 1200.0 | 22.3  | 7.0    |
| Spot 10      | 2107542 | 1687629  | 11407.4  | 1.2  | 17.7 | 1.9 | 0.3 | 2.8  | 0.0 | 1.8  | 0.657223114 | 276.1  | 4.9  | 293.5  | 7.0  | 434.0  | 46.3  | 36.4   |
| Spot 11      | 5471560 | 4381391  | 24760.0  | 10.6 | 17.8 | 1.1 | 0.4 | 1.8  | 0.0 | 1.4  | 0.796337482 | 299.2  | 4.1  | 317.2  | 4.8  | 451.6  | 23.9  | 33.7   |
| Spot 13      | 1231378 | 986035   | 12872.2  | 2.9  | 13.2 | 0.8 | 1.9 | 1.7  | 0.2 | 1.5  | 0.879371792 | 1109.1 | 14.9 | 1096.8 | 11.2 | 1072.5 | 15.9  | -3.4   |
| Spot 14      | 445834  | 357005   | 9264.7   | 2.8  | 12.3 | 3.3 | 2.2 | 4.5  | 0.2 | 3.0  | 0.675546269 | 1168.8 | 32.4 | 1179.6 | 31.3 | 1199.3 | 65.3  | 2.5    |
| Spot 15      | 2847654 | 2280280  | 9281.2   | 6.4  | 17.1 | 2.2 | 0.6 | 3.4  | 0.1 | 2.6  | 0.767004985 | 483.9  | 12.2 | 486.8  | 13.2 | 500.7  | 48.1  | 3.4    |
| Spot 17      | 3053814 | 2445364  | 25268.1  | 2.1  | 12.6 | 1.0 | 2.1 | 1.8  | 0.2 | 1.4  | 0.809167994 | 1112.4 | 14.6 | 1135.7 | 12.1 | 1180.6 | 20.5  | 5.8    |
| Spot 19      | 338310  | 270904   | 31678.5  | 2.0  | 14.7 | 3.0 | 1.3 | 4.1  | 0.1 | 2.7  | 0.676348089 | 854.5  | 22.0 | 857.7  | 23.5 | 865.9  | 62.1  | 1.3    |
| Spot 20      | 3646842 | 2920236  | 34439.3  | 15.9 | 14.0 | 0.8 | 1.5 | 1.4  | 0.2 | 1.2  | 0.82640368  | 907.3  | 9.8  | 928.1  | 8.5  | 977.8  | 16.0  | 7.2    |
| Spot 21      | 2682412 | 2147961  | 43131.2  | 0.9  | 20.0 | 1.6 | 0.2 | 2.1  | 0.0 | 1.4  | 0.639775782 | 185.9  | 2.5  | 186.9  | 3.7  | 200.2  | 38.2  | 7.1    |
| Spot 22      | 3824067 | 3062150  | 10525.1  | 3.0  | 18.2 | 1.6 | 0.3 | 2.2  | 0.0 | 1.5  | 0.68722131  | 263.9  | 3.9  | 275.2  | 5.3  | 373.1  | 36.0  | 29.3   |
| Spot 23      | 4922451 | 3941689  | 91234.2  | 8.4  | 19.4 | 1.5 | 0.3 | 1.8  | 0.0 | 1.1  | 0.591402128 | 242.9  | 2.6  | 245.6  | 4.0  | 271.8  | 33.8  | 10.6   |
| Spot 24      | 3723322 | 2981477  | 7237.5   | 5.9  | 19.7 | 1.7 | 0.3 | 3.2  | 0.0 | 1.9  | 0.601849011 | 273.2  | 5.2  | 261.2  | 7.4  | 154.8  | 60.1  | -76.5  |
| Spot 25      | 1828255 | 1463989  | 18225.0  | 11.4 | 12.9 | 1.0 | 2.0 | 1.6  | 0.2 | 1.3  | 0.794642377 | 1086.4 | 13.0 | 1100.3 | 11.0 | 1127.8 | 19.8  | 3.7    |
| Spot 26      | 2297968 | 1840115  | 4006.9   | 1.3  | 19.8 | 1.0 | 0.3 | 1.7  | 0.0 | 1.3  | 0.782119058 | 286.1  | 3.7  | 262.6  | 3.9  | 57.3   | 25.2  | -399.5 |



|         |         |         |           |      |      |     |     |     |     |     |             |        |      |        |      |        |       |        |
|---------|---------|---------|-----------|------|------|-----|-----|-----|-----|-----|-------------|--------|------|--------|------|--------|-------|--------|
| Spot 27 | 1828362 | 1464074 | 30670.7   | 1.8  | 17.7 | 1.1 | 0.6 | 1.8 | 0.1 | 1.5 | 0.809411142 | 479.6  | 6.8  | 478.3  | 6.9  | 472.3  | 23.7  | -1.5   |
| Spot 28 | 831099  | 665509  | 1205599.6 | 1.1  | 16.1 | 2.4 | 0.8 | 2.9 | 0.1 | 1.6 | 0.555477633 | 560.6  | 8.6  | 586.2  | 12.8 | 686.7  | 50.9  | 18.4   |
| Spot 29 | 861258  | 689658  | 37174.4   | 3.1  | 13.3 | 1.3 | 1.7 | 1.9 | 0.2 | 1.4 | 0.729784324 | 966.4  | 12.8 | 1001.9 | 12.4 | 1080.5 | 26.7  | 10.6   |
| Spot 31 | 2221370 | 1778779 | 7591.4    | 2.0  | 15.9 | 1.0 | 0.7 | 2.1 | 0.1 | 1.8 | 0.864397274 | 519.0  | 8.9  | 543.6  | 8.7  | 648.2  | 22.3  | 19.9   |
| Spot 32 | 3229105 | 2585729 | 78545.5   | 2.2  | 9.4  | 1.1 | 1.4 | 2.9 | 0.1 | 2.6 | 0.918677767 | 575.3  | 14.5 | 879.9  | 16.9 | 1751.3 | 20.8  | 67.2   |
| Spot 33 | 1848309 | 1480047 | 31547.8   | 1.7  | 20.4 | 1.9 | 0.3 | 3.5 | 0.0 | 3.0 | 0.851112368 | 305.7  | 9.0  | 287.7  | 8.9  | 144.2  | 43.6  | -112.0 |
| Spot 34 | 1176363 | 941981  | 34739.6   | 1.3  | 13.3 | 1.9 | 1.8 | 5.3 | 0.2 | 4.9 | 0.929712677 | 1042.6 | 47.2 | 1051.8 | 34.5 | 1070.9 | 39.0  | 2.6    |
| Spot 35 | 991086  | 793619  | 11968.8   | 1.5  | 12.6 | 1.1 | 2.0 | 3.4 | 0.2 | 3.2 | 0.944300445 | 1096.8 | 32.5 | 1124.6 | 23.2 | 1178.6 | 22.2  | 6.9    |
| Spot 36 | 2072992 | 1659963 | 5845.0    | 1.4  | 19.3 | 1.2 | 0.3 | 2.4 | 0.0 | 1.7 | 0.676222468 | 255.2  | 4.1  | 248.3  | 5.4  | 183.4  | 42.0  | -39.1  |
| Spot 37 | 7992578 | 6400115 | 4688.5    | 0.8  | 19.9 | 1.3 | 0.2 | 1.9 | 0.0 | 1.3 | 0.683940484 | 163.5  | 2.1  | 157.8  | 2.7  | 72.5   | 32.5  | -125.7 |
| Spot 38 | 2995291 | 2398501 | 6226.5    | 14.5 | 19.3 | 1.5 | 0.3 | 2.3 | 0.0 | 1.5 | 0.644854669 | 233.1  | 3.4  | 229.0  | 4.7  | 187.5  | 41.1  | -24.3  |
| Spot 39 | 3642641 | 2916871 | 54221.8   | 2.2  | 16.7 | 1.1 | 0.8 | 2.1 | 0.1 | 1.8 | 0.856279479 | 565.1  | 9.6  | 574.8  | 9.1  | 613.6  | 23.2  | 7.9    |
| Spot 40 | 555794  | 445056  | 17427.6   | 1.8  | 12.3 | 1.3 | 2.1 | 2.7 | 0.2 | 2.3 | 0.877314056 | 1123.6 | 24.0 | 1159.2 | 18.4 | 1226.4 | 25.0  | 8.4    |
| Spot 41 | 4155371 | 3327444 | 78613.1   | 1.7  | 6.4  | 1.0 | 9.7 | 2.3 | 0.4 | 2.0 | 0.90287016  | 2366.4 | 40.4 | 2402.9 | 20.8 | 2433.9 | 16.5  | 2.8    |
| Spot 42 | 1452697 | 1163257 | 3143.4    | 0.6  | 19.2 | 3.9 | 0.2 | 4.3 | 0.0 | 1.3 | 0.305940608 | 225.4  | 2.9  | 214.4  | 8.3  | 94.6   | 96.5  | -138.4 |
| Spot 43 | 8429402 | 6749905 | 53994.9   | 3.7  | 12.0 | 0.8 | 2.5 | 1.6 | 0.2 | 1.4 | 0.873558194 | 1287.9 | 16.7 | 1286.3 | 11.9 | 1283.5 | 15.5  | -0.3   |
| Spot 44 | 2020669 | 1618065 | 14615.6   | 1.3  | 18.9 | 3.0 | 0.3 | 4.3 | 0.0 | 3.1 | 0.716622816 | 287.5  | 8.7  | 289.5  | 10.8 | 305.9  | 68.3  | 6.0    |
| Spot 45 | 1651219 | 1322226 | 37355.3   | 1.2  | 10.9 | 1.4 | 2.9 | 2.4 | 0.2 | 2.0 | 0.817537076 | 1340.1 | 24.2 | 1394.8 | 18.5 | 1479.5 | 26.7  | 9.4    |
| Spot 46 | 561033  | 449252  | 1599.4    | 1.0  | 17.5 | 4.9 | 0.3 | 5.9 | 0.0 | 2.8 | 0.475990693 | 257.6  | 7.1  | 244.8  | 12.8 | 123.1  | 121.7 | -109.3 |
| Spot 47 | 2907204 | 2327965 | 14878.4   | 4.0  | 13.0 | 1.0 | 1.8 | 2.0 | 0.2 | 1.8 | 0.868337781 | 1011.1 | 16.4 | 1047.3 | 13.2 | 1123.8 | 20.0  | 10.0   |
| Spot 48 | 1015100 | 812849  | 1923.7    | 1.7  | 18.0 | 3.1 | 0.3 | 3.5 | 0.0 | 1.4 | 0.402891634 | 292.1  | 4.0  | 273.9  | 8.3  | 121.1  | 74.7  | -141.2 |
| Spot 49 | 5583379 | 4470931 | 183086.3  | 2.8  | 17.4 | 1.1 | 0.6 | 1.5 | 0.1 | 1.1 | 0.69596363  | 440.4  | 4.6  | 455.6  | 5.7  | 532.9  | 24.3  | 17.3   |
| Spot 50 | 1205678 | 965456  | 13316.8   | 2.0  | 16.9 | 1.6 | 0.7 | 2.3 | 0.1 | 1.6 | 0.695153714 | 553.2  | 8.6  | 554.7  | 10.0 | 560.6  | 36.6  | 1.3    |
| Spot 51 | 2255576 | 1806169 | 19148.0   | 1.4  | 18.8 | 2.4 | 0.3 | 2.9 | 0.0 | 1.6 | 0.550197513 | 278.1  | 4.3  | 283.7  | 7.1  | 330.5  | 54.6  | 15.9   |
| Spot 52 | 506042  | 405217  | 34710.3   | 2.4  | 14.5 | 1.4 | 1.4 | 2.3 | 0.2 | 1.8 | 0.792260439 | 909.4  | 15.5 | 908.8  | 13.9 | 907.2  | 29.0  | -0.2   |
| Spot 54 | 4810494 | 3852038 | 6854.1    | 19.2 | 19.7 | 1.4 | 0.3 | 2.2 | 0.0 | 1.3 | 0.603220273 | 240.8  | 3.1  | 232.8  | 4.5  | 152.8  | 40.3  | -57.5  |
| Spot 55 | 2391789 | 1915243 | 27489.9   | 3.2  | 17.7 | 1.6 | 0.7 | 2.8 | 0.1 | 2.3 | 0.809718192 | 539.5  | 11.7 | 526.3  | 11.4 | 469.7  | 36.2  | -14.9  |
| Spot 56 | 1398897 | 1120177 | 6082.5    | 0.8  | 18.2 | 4.2 | 0.2 | 5.7 | 0.0 | 3.7 | 0.649610124 | 183.8  | 6.8  | 194.5  | 10.2 | 325.6  | 99.1  | 43.5   |
| Spot 57 | 7278796 | 5828549 | 73559.8   | 7.0  | 14.8 | 0.9 | 0.6 | 1.7 | 0.1 | 1.4 | 0.857048346 | 384.8  | 5.3  | 460.4  | 6.1  | 857.6  | 17.7  | 55.1   |
| Spot 58 | 2622385 | 2099894 | 34731.3   | 4.3  | 12.6 | 1.0 | 2.1 | 2.1 | 0.2 | 1.9 | 0.874172343 | 1132.4 | 19.3 | 1150.4 | 14.6 | 1184.3 | 20.4  | 4.4    |
| Spot 59 | 3906649 | 3128277 | 21173.7   | 9.1  | 15.9 | 1.2 | 0.9 | 2.0 | 0.1 | 1.6 | 0.784619391 | 618.2  | 9.4  | 633.1  | 9.5  | 686.7  | 26.8  | 10.0   |
| Spot 60 | 2519019 | 2017123 | 38065.4   | 0.4  | 19.5 | 2.5 | 0.2 | 3.9 | 0.0 | 3.0 | 0.77401739  | 182.1  | 5.4  | 186.9  | 6.7  | 248.7  | 56.9  | 26.8   |
| Spot 61 | 3854823 | 3086778 | 17167.9   | 4.4  | 17.7 | 1.4 | 0.6 | 2.1 | 0.1 | 1.5 | 0.721058669 | 451.6  | 6.6  | 451.6  | 7.7  | 451.7  | 32.4  | 0.0    |
| Spot 62 | 2593200 | 2076524 | 103033.4  | 2.0  | 12.0 | 0.9 | 2.3 | 1.5 | 0.2 | 1.2 | 0.800847853 | 1163.7 | 12.7 | 1203.8 | 10.5 | 1276.4 | 17.3  | 8.8    |
| Spot 63 | 9131757 | 7312321 | 37372.4   | 0.9  | 19.4 | 1.9 | 0.3 | 3.0 | 0.0 | 2.4 | 0.784712488 | 269.0  | 6.3  | 268.0  | 7.2  | 259.1  | 43.4  | -3.8   |
| Spot 64 | 6455259 | 5169095 | 49867.8   | 3.0  | 12.2 | 0.9 | 2.3 | 1.6 | 0.2 | 1.4 | 0.844867261 | 1190.1 | 15.0 | 1211.2 | 11.5 | 1249.0 | 17.1  | 4.7    |
| Spot 66 | 6117215 | 4898404 | 21758.2   | 7.3  | 12.3 | 1.1 | 2.1 | 1.9 | 0.2 | 1.6 | 0.838252665 | 1108.8 | 16.5 | 1144.9 | 13.3 | 1214.1 | 20.8  | 8.7    |
| Spot 67 | 3325828 | 2663181 | 12425.8   | 1.2  | 17.5 | 3.6 | 0.2 | 3.9 | 0.0 | 1.4 | 0.367727579 | 155.0  | 2.2  | 175.3  | 6.3  | 458.2  | 81.0  | 66.2   |
| Spot 68 | 8983843 | 7193878 | 294661.2  | 11.3 | 13.4 | 0.8 | 1.8 | 1.4 | 0.2 | 1.1 | 0.80333932  | 1048.8 | 11.1 | 1055.4 | 9.4  | 1069.1 | 17.0  | 1.9    |
| Spot 69 | 4388956 | 3514488 | 69531.8   | 23.5 | 19.5 | 1.2 | 0.3 | 1.9 | 0.0 | 1.5 | 0.777539422 | 250.8  | 3.7  | 250.4  | 4.3  | 246.7  | 28.1  | -1.6   |
| Spot 70 | 3279124 | 2625783 | 28361.7   | 1.8  | 17.3 | 2.0 | 0.4 | 3.1 | 0.0 | 2.3 | 0.757265515 | 292.1  | 6.7  | 317.5  | 8.4  | 509.1  | 44.5  | 42.6   |
| Spot 71 | 1416774 | 1134492 | 60377.8   | 3.4  | 12.2 | 1.0 | 2.3 | 3.2 | 0.2 | 3.1 | 0.948083636 | 1179.3 | 32.9 | 1204.4 | 22.7 | 1249.9 | 20.0  | 5.7    |
| Spot 72 | 2414908 | 1933755 | 4770.7    | 1.6  | 20.4 | 3.5 | 0.1 | 4.0 | 0.0 | 1.9 | 0.480911683 | 73.5   | 1.4  | 71.5   | 2.8  | 5.7    | NA    |        |

|          |          |          |           |      |      |     |     |     |     |     |             |        |      |        |      |        |       |       |
|----------|----------|----------|-----------|------|------|-----|-----|-----|-----|-----|-------------|--------|------|--------|------|--------|-------|-------|
| Spot 73  | 6481508  | 5190115  | 177851.8  | 1.4  | 19.0 | 1.1 | 0.3 | 1.8 | 0.0 | 1.5 | 0.793049847 | 276.6  | 3.9  | 281.7  | 4.5  | 323.9  | 25.4  | 14.6  |
| Spot 74  | 973619   | 779632   | 13662.5   | 1.9  | 9.3  | 1.0 | 4.3 | 2.6 | 0.3 | 2.4 | 0.924125901 | 1642.5 | 35.3 | 1688.8 | 21.7 | 1746.9 | 18.5  | 6.0   |
| Spot 76  | 6780348  | 5429413  | 2490.2    | 79.8 | 13.9 | 5.8 | 0.2 | 6.2 | 0.0 | 1.1 | 0.177132538 | 113.1  | 1.2  | 152.7  | 8.8  | 822.8  | 128.0 | 86.3  |
| Spot 77  | 2907199  | 2327961  | 6796.0    | 4.0  | 17.8 | 2.4 | 0.4 | 3.2 | 0.0 | 1.9 | 0.592043175 | 308.7  | 5.6  | 316.2  | 8.6  | 371.6  | 57.2  | 16.9  |
| Spot 78  | 6828963  | 5468342  | 25876.8   | 1.1  | 19.2 | 1.2 | 0.3 | 1.8 | 0.0 | 1.3 | 0.727733956 | 275.7  | 3.6  | 274.9  | 4.4  | 268.5  | 29.0  | -2.7  |
| Spot 79  | 4251381  | 3404324  | 29564.8   | 1.1  | 19.9 | 1.2 | 0.2 | 1.9 | 0.0 | 1.4 | 0.763717397 | 183.9  | 2.6  | 184.4  | 3.2  | 191.7  | 28.3  | 4.1   |
| Spot 80  | 1771919  | 1418877  | 5292.0    | 0.9  | 13.5 | 4.1 | 0.8 | 5.1 | 0.1 | 2.4 | 0.46098127  | 490.9  | 11.2 | 587.2  | 22.9 | 979.8  | 92.8  | 49.9  |
| Spot 81  | 7251307  | 5806536  | 116209.7  | 1.1  | 17.6 | 1.0 | 0.6 | 1.6 | 0.1 | 1.2 | 0.763465759 | 451.3  | 5.3  | 459.0  | 5.9  | 497.2  | 22.6  | 9.2   |
| Spot 82  | 1402517  | 1123075  | 10425.6   | 1.1  | 13.4 | 0.8 | 1.8 | 1.8 | 0.2 | 1.5 | 0.81399235  | 1045.3 | 14.5 | 1040.6 | 12.0 | 1030.7 | 21.7  | -1.4  |
| Spot 84  | 1693666  | 1356215  | 262997.1  | 3.8  | 11.6 | 0.9 | 2.8 | 1.5 | 0.2 | 1.3 | 0.815508123 | 1343.6 | 15.2 | 1345.0 | 11.4 | 1347.1 | 17.1  | 0.3   |
| Spot 85  | 3772782  | 3021082  | 40794.7   | 2.4  | 12.6 | 0.7 | 2.1 | 1.5 | 0.2 | 1.3 | 0.882760803 | 1118.6 | 13.3 | 1139.2 | 10.1 | 1178.6 | 13.7  | 5.1   |
| Spot 86  | 1744549  | 1396961  | 29878.9   | 3.7  | 12.6 | 1.0 | 2.2 | 2.6 | 0.2 | 2.4 | 0.928698493 | 1157.7 | 25.3 | 1167.8 | 17.8 | 1186.5 | 18.8  | 2.4   |
| Spot 87  | 4496243  | 3600399  | 2414920.3 | 5.6  | 13.7 | 1.2 | 1.5 | 2.1 | 0.1 | 1.7 | 0.81967382  | 870.2  | 14.0 | 915.9  | 12.6 | 1027.8 | 24.3  | 15.3  |
| Spot 88  | 7279147  | 5828830  | 180477.2  | 6.3  | 17.6 | 1.2 | 0.6 | 1.9 | 0.1 | 1.5 | 0.770748712 | 464.9  | 6.5  | 469.4  | 7.1  | 491.7  | 26.6  | 5.5   |
| Spot 89  | 1821661  | 1458708  | 27355.0   | 5.7  | 12.7 | 1.1 | 2.1 | 2.5 | 0.2 | 2.3 | 0.902853293 | 1120.4 | 23.2 | 1135.9 | 17.1 | 1165.4 | 21.3  | 3.9   |
| Spot 90  | 1301252  | 1041987  | 72829.2   | 3.1  | 15.9 | 2.5 | 1.0 | 3.2 | 0.1 | 2.0 | 0.628670262 | 707.1  | 13.4 | 706.3  | 16.2 | 703.9  | 52.5  | -0.4  |
| Spot 92  | 3580126  | 2866812  | 11913.4   | 0.7  | 14.5 | 2.4 | 0.9 | 3.4 | 0.1 | 2.2 | 0.663065317 | 612.8  | 13.1 | 670.0  | 16.6 | 867.4  | 52.4  | 29.4  |
| Spot 93  | 1619591  | 1296899  | 41318.4   | 1.6  | 13.2 | 1.7 | 1.8 | 2.7 | 0.2 | 2.1 | 0.780613184 | 1010.9 | 19.7 | 1035.1 | 17.5 | 1086.6 | 33.8  | 7.0   |
| Spot 94  | 10837800 | 8678447  | 138642.2  | 4.5  | 12.4 | 0.9 | 2.4 | 1.5 | 0.2 | 1.2 | 0.799910427 | 1238.9 | 13.8 | 1231.1 | 10.9 | 1217.4 | 18.0  | -1.8  |
| Spot 95  | 5847283  | 4682254  | 7975.7    | 14.2 | 18.1 | 1.6 | 0.3 | 2.3 | 0.0 | 1.4 | 0.594456354 | 234.6  | 3.1  | 245.6  | 5.0  | 351.7  | 41.6  | 33.3  |
| Spot 97  | 458214   | 366918   | 4179.9    | 2.0  | 12.3 | 1.4 | 1.9 | 2.6 | 0.2 | 1.9 | 0.712752758 | 1057.2 | 18.1 | 1088.0 | 17.4 | 1150.0 | 36.3  | 8.1   |
| Spot 98  | 2503956  | 2005061  | 11919.6   | 4.1  | 19.8 | 1.5 | 0.3 | 2.4 | 0.0 | 1.7 | 0.712526723 | 259.6  | 4.4  | 250.1  | 5.4  | 162.7  | 40.2  | -59.5 |
| Spot 99  | 3086258  | 2471344  | 45899.1   | 4.0  | 10.6 | 1.0 | 3.4 | 1.8 | 0.3 | 1.5 | 0.833564031 | 1500.6 | 20.5 | 1505.3 | 14.4 | 1511.8 | 19.1  | 0.7   |
| Spot 100 | 6084559  | 4872254  | 21614.8   | 2.3  | 19.5 | 1.8 | 0.3 | 2.8 | 0.0 | 2.1 | 0.759115864 | 296.1  | 6.1  | 289.2  | 7.0  | 233.9  | 41.8  | -26.6 |
| Spot 101 | 4390392  | 3515638  | 24986.4   | 0.8  | 18.2 | 1.8 | 0.3 | 2.5 | 0.0 | 1.7 | 0.681865088 | 261.9  | 4.4  | 276.1  | 6.1  | 398.3  | 41.3  | 34.2  |
| Spot 102 | 1680724  | 1345852  | 59954.2   | 3.7  | 11.6 | 0.9 | 2.8 | 1.6 | 0.2 | 1.3 | 0.803223506 | 1359.5 | 15.4 | 1355.4 | 11.7 | 1349.1 | 18.0  | -0.8  |
| Spot 104 | 1529515  | 1224770  | 74947.8   | 3.2  | 10.4 | 0.9 | 3.5 | 1.7 | 0.3 | 1.4 | 0.827778211 | 1518.6 | 18.8 | 1534.1 | 13.3 | 1555.4 | 17.7  | 2.4   |
| Spot 105 | 1827167  | 1463117  | 19388.7   | 2.5  | 9.7  | 1.0 | 4.1 | 1.9 | 0.3 | 1.6 | 0.84291796  | 1653.3 | 22.8 | 1659.7 | 15.1 | 1667.8 | 18.4  | 0.9   |
| Spot 107 | 3056070  | 2447171  | 34233.5   | 4.5  | 12.8 | 1.0 | 2.1 | 2.0 | 0.2 | 1.7 | 0.865313945 | 1141.7 | 17.8 | 1145.0 | 13.5 | 1151.3 | 19.6  | 0.8   |
| Spot 108 | 2822038  | 2259767  | 6134.8    | 1.5  | 18.8 | 1.3 | 0.3 | 2.1 | 0.0 | 1.7 | 0.770392935 | 273.1  | 4.4  | 270.0  | 5.1  | 243.6  | 31.5  | -12.1 |
| Spot 109 | 1272053  | 1018606  | 4619.7    | 1.8  | 19.2 | 2.4 | 0.3 | 2.7 | 0.0 | 1.1 | 0.415227206 | 240.3  | 2.6  | 231.7  | 5.6  | 144.8  | 57.6  | -66.0 |
| Spot 110 | 1002496  | 802756   | 5995.0    | 2.1  | 12.6 | 1.4 | 2.0 | 2.4 | 0.2 | 1.9 | 0.794231461 | 1123.3 | 19.3 | 1126.1 | 16.0 | 1131.5 | 28.4  | 0.7   |
| Spot 111 | 2134864  | 1709508  | 107018.9  | 2.4  | 13.3 | 1.1 | 1.8 | 1.8 | 0.2 | 1.5 | 0.797908503 | 1020.2 | 13.7 | 1041.5 | 11.9 | 1086.3 | 22.0  | 6.1   |
| Spot 112 | 15383158 | 12318176 | 17311.4   | 6.0  | 13.1 | 1.5 | 1.7 | 2.7 | 0.2 | 2.2 | 0.80664046  | 978.4  | 19.6 | 1014.9 | 17.2 | 1094.6 | 31.6  | 10.6  |
| Spot 113 | 2490252  | 1994087  | 58308.8   | 0.7  | 17.5 | 1.2 | 0.7 | 1.9 | 0.1 | 1.5 | 0.786378798 | 519.2  | 7.4  | 517.8  | 7.7  | 511.7  | 25.8  | -1.5  |
| Spot 114 | 1515988  | 1213938  | 15465.5   | 0.9  | 17.7 | 3.2 | 0.3 | 3.8 | 0.0 | 2.1 | 0.542184806 | 274.6  | 5.6  | 294.1  | 9.8  | 452.4  | 71.4  | 39.3  |
| Spot 115 | 594460   | 476018   | 7019.2    | 2.0  | 13.5 | 1.2 | 1.5 | 2.5 | 0.2 | 1.7 | 0.68568871  | 927.2  | 15.0 | 948.6  | 15.6 | 998.5  | 37.5  | 7.1   |
| Spot 116 | 2443512  | 1956660  | 28210.7   | 2.2  | 17.9 | 2.7 | 0.5 | 4.1 | 0.1 | 3.0 | 0.738218491 | 390.9  | 11.4 | 399.8  | 13.4 | 451.6  | 60.8  | 13.4  |
| Spot 117 | 1499523  | 1200754  | 7720.1    | 1.5  | 19.2 | 1.9 | 0.3 | 2.5 | 0.0 | 1.6 | 0.634899552 | 276.5  | 4.3  | 271.5  | 5.9  | 228.7  | 44.5  | -20.9 |
| Spot 118 | 2303474  | 1844523  | 18811.0   | 6.3  | 18.2 | 2.8 | 0.3 | 3.5 | 0.0 | 2.1 | 0.612976041 | 242.5  | 5.1  | 257.3  | 7.9  | 394.7  | 61.9  | 38.6  |
| Spot 119 | 1725406  | 1381631  | 330852.4  | 1.5  | 12.9 | 0.8 | 2.2 | 1.3 | 0.2 | 1.0 | 0.778382078 | 1202.2 | 10.9 | 1182.1 | 8.9  | 1145.5 | 16.0  | -4.9  |
| Spot 120 | 1764496  | 1412933  | 41455.0   | 1.0  | 11.4 | 0.8 | 2.9 | 1.4 | 0.2 | 1.1 | 0.800464975 | 1368.6 | 13.6 | 1375.7 | 10.3 | 1386.8 | 15.8  | 1.3   |
| Spot 122 | 733055   | 586999   | 973.5     | 1.6  | 18.1 | 4.8 | 0.2 | 6.1 | 0.0 | 3.6 | 0.592879258 | 281.2  | 9.9  | 225.0  | 12.2 | NA     | NA    |       |

|          |         |         |          |      |      |     |     |     |     |     |             |        |      |        |      |        |      |        |
|----------|---------|---------|----------|------|------|-----|-----|-----|-----|-----|-------------|--------|------|--------|------|--------|------|--------|
| Spot 124 | 2735317 | 2190325 | 24880.4  | 6.6  | 14.8 | 1.7 | 0.5 | 3.1 | 0.1 | 2.5 | 0.832232308 | 369.6  | 9.1  | 444.6  | 11.0 | 854.3  | 35.2 | 56.7   |
| Spot 125 | 3408850 | 2729662 | 7932.4   | 4.3  | 17.5 | 2.0 | 0.4 | 2.6 | 0.1 | 1.7 | 0.637251557 | 329.7  | 5.4  | 343.6  | 7.7  | 438.8  | 45.1 | 24.9   |
| Spot 126 | 1844511 | 1477005 | 5130.2   | 0.9  | 17.7 | 2.6 | 0.3 | 3.3 | 0.0 | 1.8 | 0.560101346 | 263.9  | 4.7  | 275.4  | 7.8  | 374.2  | 60.6 | 29.5   |
| Spot 127 | 1110391 | 889154  | 1323.6   | 2.1  | 16.2 | 2.8 | 0.2 | 3.3 | 0.0 | 1.7 | 0.501062891 | 166.8  | 2.8  | 172.2  | 5.3  | 246.0  | 66.8 | 32.2   |
| Spot 128 | 1763197 | 1411893 | 8437.1   | 4.9  | 14.1 | 1.4 | 1.5 | 2.1 | 0.2 | 1.5 | 0.699398894 | 915.7  | 12.6 | 918.4  | 12.8 | 925.2  | 31.0 | 1.0    |
| Spot 129 | 8485092 | 6794499 | 22132.7  | 1.7  | 13.0 | 0.8 | 2.0 | 1.6 | 0.2 | 1.4 | 0.840202072 | 1104.3 | 13.9 | 1111.3 | 11.0 | 1125.0 | 17.6 | 1.8    |
| Spot 130 | 2826248 | 2263139 | 1109.7   | 1.5  | 19.3 | 3.6 | 0.1 | 4.2 | 0.0 | 1.9 | 0.444793003 | 82.4   | 1.5  | 67.4   | 2.7  | NA     | NA   |        |
| Spot 131 | 5610955 | 4493013 | 4069.0   | 6.2  | 15.5 | 1.5 | 0.3 | 1.9 | 0.0 | 1.2 | 0.627605884 | 215.2  | 2.6  | 257.5  | 4.4  | 662.2  | 32.2 | 67.5   |
| Spot 132 | 2039166 | 1632877 | 14523.9  | 1.3  | 19.2 | 1.8 | 0.3 | 2.4 | 0.0 | 1.5 | 0.639642084 | 278.4  | 4.2  | 277.8  | 5.9  | 272.5  | 42.6 | -2.1   |
| Spot 133 | 1766417 | 1414471 | 10452.8  | 3.0  | 12.2 | 1.5 | 2.0 | 2.0 | 0.2 | 1.3 | 0.623870841 | 1064.6 | 12.4 | 1120.4 | 13.7 | 1230.2 | 31.0 | 13.5   |
| Spot 134 | 2944534 | 2357857 | 7472.4   | 2.2  | 26.8 | 2.8 | 0.1 | 3.6 | 0.0 | 2.4 | 0.651889522 | 93.5   | 2.2  | 70.7   | 2.5  | NA     | NA   |        |
| Spot 135 | 712434  | 570487  | 22688.8  | 1.8  | 17.9 | 2.7 | 0.7 | 3.8 | 0.1 | 2.7 | 0.716603831 | 564.7  | 14.9 | 541.0  | 16.1 | 442.4  | 59.5 | -27.6  |
| Spot 136 | 2136820 | 1711074 | 175197.7 | 1.6  | 18.2 | 2.1 | 0.3 | 3.2 | 0.0 | 2.3 | 0.736509924 | 268.0  | 6.1  | 285.4  | 7.9  | 431.0  | 47.6 | 37.8   |
| Spot 137 | 2282254 | 1827532 | 83212.1  | 3.1  | 14.1 | 1.1 | 1.5 | 1.8 | 0.2 | 1.4 | 0.791327551 | 903.3  | 12.0 | 923.8  | 10.9 | 973.1  | 22.4 | 7.2    |
| Spot 139 | 2458065 | 1968313 | 6498.7   | 1.2  | 12.2 | 4.4 | 0.5 | 4.7 | 0.0 | 1.2 | 0.260338333 | 268.2  | 3.2  | 393.3  | 15.3 | 1216.0 | 88.9 | 77.9   |
| Spot 140 | 7418979 | 5940801 | 585057.1 | 4.3  | 12.6 | 0.9 | 2.2 | 1.4 | 0.2 | 1.0 | 0.766888279 | 1184.3 | 11.2 | 1188.0 | 9.5  | 1194.7 | 17.1 | 0.9    |
| Spot 141 | 956428  | 765867  | 28618.5  | 3.1  | 14.5 | 1.2 | 1.3 | 1.7 | 0.1 | 1.2 | 0.694658529 | 801.5  | 8.9  | 828.1  | 9.7  | 900.2  | 25.3 | 11.0   |
| Spot 142 | 1885663 | 1509958 | 135790.1 | 3.2  | 12.3 | 0.7 | 2.4 | 1.4 | 0.2 | 1.2 | 0.843815112 | 1220.4 | 12.8 | 1231.4 | 9.7  | 1250.7 | 14.3 | 2.4    |
| Spot 143 | 417971  | 334693  | 885.0    | 3.3  | 16.4 | 4.4 | 0.2 | 6.6 | 0.0 | 1.6 | 0.236515259 | 215.8  | 3.3  | 193.6  | 11.7 | NA     | NA   |        |
| Spot 144 | 886569  | 709927  | 4243.2   | 0.9  | 19.0 | 3.0 | 0.3 | 4.8 | 0.0 | 3.4 | 0.707665938 | 276.3  | 9.1  | 266.6  | 11.2 | 182.3  | 78.7 | -51.5  |
| Spot 146 | 383691  | 307243  | 466868.7 | 2.5  | 13.2 | 2.0 | 1.9 | 3.5 | 0.2 | 2.9 | 0.819041945 | 1092.8 | 29.2 | 1094.8 | 23.8 | 1098.7 | 40.7 | 0.5    |
| Spot 147 | 2013616 | 1612417 | 5905.3   | 0.7  | 20.0 | 1.9 | 0.3 | 5.5 | 0.0 | 5.1 | 0.933857331 | 302.4  | 15.0 | 280.0  | 13.3 | 96.2   | 46.2 | -214.3 |
| Spot 148 | 2767576 | 2216157 | 12537.3  | 1.2  | 18.5 | 2.2 | 0.3 | 2.8 | 0.0 | 1.7 | 0.6030528   | 260.4  | 4.3  | 268.6  | 6.5  | 341.1  | 49.9 | 23.6   |
| Spot 149 | 1322602 | 1059084 | 20094.1  | 1.8  | 18.3 | 2.9 | 0.3 | 3.5 | 0.0 | 1.9 | 0.542155654 | 279.7  | 5.2  | 291.0  | 8.8  | 382.8  | 66.0 | 26.9   |
| Spot 150 | 9542573 | 7641285 | 21995.0  | 1.8  | 18.8 | 0.9 | 0.4 | 1.6 | 0.1 | 1.3 | 0.823429877 | 338.4  | 4.3  | 336.2  | 4.5  | 321.3  | 20.3 | -5.3   |
| Spot 151 | 1631227 | 1306217 | 1585.4   | 0.8  | 19.2 | 1.4 | 0.3 | 2.2 | 0.0 | 1.6 | 0.726222233 | 279.3  | 4.4  | 236.3  | 4.7  | NA     | NA   |        |
| Spot 152 | 1196760 | 958314  | 2785.5   | 1.0  | 18.3 | 2.6 | 0.3 | 4.3 | 0.0 | 2.6 | 0.622784531 | 249.4  | 6.5  | 243.3  | 9.2  | 184.9  | 77.5 | -34.9  |
| Spot 153 | 3849212 | 3082285 | 40604.6  | 0.8  | 12.8 | 0.8 | 2.0 | 1.6 | 0.2 | 1.4 | 0.867641975 | 1103.8 | 14.3 | 1122.6 | 11.0 | 1159.1 | 16.0 | 4.8    |
| Spot 155 | 3994462 | 3198595 | 21159.4  | 1.8  | 17.3 | 0.7 | 0.6 | 1.3 | 0.1 | 1.0 | 0.808178954 | 444.7  | 4.5  | 455.3  | 4.8  | 509.1  | 16.8 | 12.6   |
| Spot 158 | 3642806 | 2917004 | 10218.7  | 13.3 | 19.5 | 1.3 | 0.3 | 1.9 | 0.0 | 1.4 | 0.733913276 | 242.1  | 3.3  | 238.0  | 4.0  | 198.2  | 29.7 | -22.2  |
| Spot 159 | 4476045 | 3584226 | 137914.1 | 9.2  | 7.2  | 1.3 | 1.9 | 6.0 | 0.1 | 5.9 | 0.975762616 | 623.4  | 34.9 | 1096.3 | 40.4 | 2212.8 | 22.8 | 71.8   |
| Spot 160 | 693306  | 555170  | 7967.1   | 3.3  | 14.1 | 1.6 | 1.4 | 2.6 | 0.1 | 2.0 | 0.774845219 | 870.0  | 16.1 | 883.8  | 15.1 | 918.4  | 33.2 | 5.3    |
| Spot 162 | 4834612 | 3871351 | 32479.7  | 2.6  | 11.4 | 0.8 | 2.8 | 1.4 | 0.2 | 1.1 | 0.809732093 | 1346.6 | 13.4 | 1359.0 | 10.2 | 1378.6 | 15.3 | 2.3    |
| Spot 163 | 1108946 | 887997  | 2103.4   | 1.3  | 19.7 | 4.0 | 0.2 | 6.3 | 0.0 | 3.0 | 0.475404056 | 206.6  | 6.1  | 184.0  | 10.6 | NA     | NA   |        |
| Spot 164 | 689461  | 552091  | 4429.7   | 3.4  | 13.8 | 1.2 | 1.5 | 3.0 | 0.2 | 1.5 | 0.508438771 | 921.9  | 13.0 | 925.3  | 18.0 | 933.3  | 52.5 | 1.2    |
| Spot 165 | 1513528 | 1211969 | 15943.4  | 1.1  | 11.6 | 0.8 | 2.7 | 1.5 | 0.2 | 1.3 | 0.844205729 | 1298.6 | 15.2 | 1317.6 | 11.3 | 1348.5 | 15.9 | 3.7    |
| Spot 166 | 1503201 | 1203699 | 10589.9  | 2.2  | 19.1 | 1.6 | 0.3 | 2.3 | 0.0 | 1.6 | 0.700283946 | 284.0  | 4.5  | 281.8  | 5.6  | 263.8  | 37.6 | -7.7   |
| Spot 167 | 3651318 | 2923819 | 403580.2 | 3.6  | 13.6 | 1.1 | 1.6 | 1.9 | 0.2 | 1.5 | 0.797377418 | 946.3  | 13.1 | 977.6  | 11.7 | 1048.8 | 22.7 | 9.8    |
| Spot 168 | 3918738 | 3137958 | 238224.2 | 8.6  | 18.3 | 1.7 | 0.3 | 2.2 | 0.0 | 1.4 | 0.623610415 | 275.9  | 3.8  | 291.3  | 5.7  | 416.7  | 39.1 | 33.8   |
| Spot 169 | 499822  | 400236  | 10461.8  | 2.3  | 13.7 | 2.3 | 1.4 | 3.5 | 0.1 | 2.6 | 0.754640006 | 834.9  | 20.5 | 879.8  | 20.4 | 994.5  | 46.3 | 16.1   |
| Spot 171 | 945488  | 757107  | 8515.5   | 1.0  | 16.8 | 1.7 | 0.6 | 2.7 | 0.1 | 2.1 | 0.777072547 | 444.2  | 9.2  | 460.9  | 10.2 | 545.1  | 37.7 | 18.5   |
| Spot 172 | 3955098 | 3167073 | 35724.1  | 2.7  | 11.4 | 0.7 | 2.4 | 1.6 | 0.2 | 1.5 | 0.899009888 | 1155.7 | 15.4 | 1236.4 | 11.6 | 1379.9 | 13.7 | 16.2   |
| Spot 173 | 1200072 | 960966  | 14908.0  | 2.7  | 12.3 | 1.0 | 2.3 | 1.8 | 0.2 | 1.4 | 0.802719644 | 1216.1 | 15.8 | 1219.8 | 12.6 | 1226.2 | 20.8 | 0.8    |

|          |          |         |          |      |      |     |     |      |     |     |             |        |      |        |      |        |       |        |
|----------|----------|---------|----------|------|------|-----|-----|------|-----|-----|-------------|--------|------|--------|------|--------|-------|--------|
| Spot 174 | 1448604  | 1159980 | 39599.3  | 1.4  | 13.5 | 2.2 | 1.8 | 3.5  | 0.2 | 2.7 | 0.784115883 | 1071.0 | 27.0 | 1061.8 | 23.0 | 1042.9 | 43.7  | -2.7   |
| Spot 176 | 1497845  | 1199410 | 17861.0  | 1.5  | 18.4 | 1.3 | 0.4 | 2.4  | 0.1 | 2.0 | 0.832194637 | 337.9  | 6.6  | 341.7  | 6.9  | 367.4  | 29.9  | 8.0    |
| Spot 177 | 4689006  | 3754756 | 30436.1  | 2.4  | 13.5 | 0.9 | 1.8 | 1.9  | 0.2 | 1.7 | 0.870086012 | 1024.7 | 15.8 | 1029.9 | 12.4 | 1041.0 | 19.1  | 1.6    |
| Spot 178 | 5715340  | 4576600 | 36419.5  | 2.4  | 13.9 | 2.0 | 0.5 | 2.7  | 0.1 | 1.8 | 0.676432845 | 323.6  | 5.8  | 418.6  | 9.3  | 982.4  | 40.8  | 67.1   |
| Spot 179 | 3097916  | 2480679 | 39351.6  | 2.1  | 13.0 | 0.8 | 1.9 | 1.8  | 0.2 | 1.6 | 0.892290812 | 1050.6 | 15.8 | 1076.4 | 12.1 | 1129.1 | 16.4  | 7.0    |
| Spot 181 | 1664523  | 1332879 | 3979.8   | 1.4  | 17.8 | 1.3 | 0.5 | 2.3  | 0.1 | 1.8 | 0.777882479 | 464.2  | 8.0  | 441.5  | 8.3  | 324.7  | 32.9  | -43.0  |
| Spot 182 | 1849264  | 1480811 | 463138.5 | 4.6  | 14.0 | 1.2 | 1.5 | 2.3  | 0.2 | 1.9 | 0.837453752 | 915.6  | 16.2 | 934.7  | 13.8 | 980.0  | 25.2  | 6.6    |
| Spot 183 | 2540435  | 2034272 | 35002.9  | 1.5  | 11.9 | 1.0 | 2.5 | 1.9  | 0.2 | 1.7 | 0.856449703 | 1261.4 | 19.1 | 1278.0 | 14.1 | 1305.9 | 19.5  | 3.4    |
| Spot 184 | 952310   | 762569  | 72459.2  | 3.2  | 11.2 | 1.5 | 2.6 | 2.0  | 0.2 | 1.3 | 0.651133168 | 1244.8 | 14.6 | 1308.2 | 14.6 | 1413.9 | 28.8  | 12.0   |
| Spot 186 | 9085953  | 7275643 | 35329.8  | 26.0 | 13.7 | 1.5 | 1.1 | 2.1  | 0.1 | 1.4 | 0.682278824 | 679.4  | 9.1  | 762.3  | 11.1 | 1013.7 | 30.8  | 33.0   |
| Spot 187 | 2704619  | 2165743 | 11446.4  | 3.3  | 14.7 | 1.5 | 0.9 | 3.0  | 0.1 | 2.5 | 0.830739516 | 573.7  | 13.7 | 633.0  | 14.2 | 851.1  | 34.8  | 32.6   |
| Spot 188 | 798627   | 639507  | 1691.9   | 1.2  | 29.1 | 2.1 | 0.2 | 11.8 | 0.1 | 2.0 | 0.167911383 | 409.9  | 7.8  | 211.7  | 22.5 | NA     | NA    |        |
| Spot 189 | 978015   | 783153  | 17449.9  | 2.2  | 11.5 | 1.0 | 2.5 | 2.8  | 0.2 | 2.6 | 0.926562949 | 1235.2 | 29.0 | 1277.4 | 20.2 | 1349.0 | 20.2  | 8.4    |
| Spot 190 | 1947198  | 1559233 | 5086.2   | 1.2  | 18.5 | 2.4 | 0.3 | 3.5  | 0.0 | 2.4 | 0.673261947 | 299.4  | 6.9  | 294.4  | 9.0  | 255.6  | 59.7  | -17.1  |
| Spot 191 | 5120619  | 4100373 | 8338.5   | 2.3  | 19.0 | 0.9 | 0.4 | 1.4  | 0.1 | 1.2 | 0.803578186 | 398.4  | 4.5  | 376.8  | 4.5  | 246.3  | 19.8  | -61.8  |
| Spot 193 | 9245908  | 7403728 | 169908.0 | 3.3  | 12.8 | 1.1 | 2.1 | 2.6  | 0.2 | 2.4 | 0.914724844 | 1126.1 | 24.7 | 1138.1 | 17.9 | 1160.9 | 21.0  | 3.0    |
| Spot 194 | 841593   | 673912  | 155404.6 | 2.7  | 13.9 | 2.2 | 1.5 | 3.3  | 0.1 | 2.5 | 0.756856681 | 900.8  | 21.0 | 927.7  | 20.1 | 992.1  | 43.9  | 9.2    |
| Spot 195 | 2720698  | 2178618 | 7976.2   | 1.1  | 19.8 | 1.5 | 0.3 | 2.5  | 0.0 | 1.6 | 0.632576215 | 281.4  | 4.4  | 267.1  | 6.0  | 143.0  | 46.3  | -96.9  |
| Spot 196 | 4226763  | 3384611 | 3508.9   | 1.4  | 19.2 | 1.6 | 0.3 | 2.8  | 0.0 | 1.6 | 0.558024844 | 248.5  | 3.8  | 235.0  | 5.8  | 102.6  | 54.7  | -142.1 |
| Spot 197 | 4124941  | 3303077 | 9681.8   | 1.1  | 19.2 | 1.1 | 0.3 | 1.9  | 0.0 | 1.5 | 0.773502767 | 271.2  | 4.0  | 267.5  | 4.6  | 235.1  | 28.5  | -15.3  |
| Spot 198 | 3561050  | 2851537 | 37594.8  | 5.3  | 11.9 | 0.6 | 2.6 | 1.3  | 0.2 | 1.2 | 0.909149819 | 1311.1 | 14.5 | 1303.3 | 9.9  | 1290.4 | 10.9  | -1.6   |
| Spot 199 | 1838363  | 1472082 | 46845.4  | 3.2  | 7.2  | 0.9 | 7.4 | 1.5  | 0.4 | 1.2 | 0.812208549 | 2114.1 | 22.5 | 2163.7 | 13.7 | 2211.0 | 15.5  | 4.4    |
| Spot 200 | 6910253  | 5533435 | 20998.4  | 3.3  | 11.6 | 0.7 | 2.2 | 1.8  | 0.2 | 1.6 | 0.9129273   | 1081.4 | 16.1 | 1168.1 | 12.3 | 1332.6 | 14.0  | 18.8   |
| Spot 201 | 9628872  | 7710389 | 121685.5 | 8.0  | 14.4 | 0.8 | 1.4 | 1.7  | 0.1 | 1.5 | 0.875539514 | 864.9  | 12.2 | 882.9  | 10.1 | 928.2  | 17.1  | 6.8    |
| Spot 202 | 5325128  | 4264135 | 33463.7  | 6.9  | 14.1 | 1.0 | 1.5 | 1.5  | 0.2 | 1.1 | 0.746565997 | 936.4  | 9.9  | 941.4  | 9.3  | 953.2  | 20.6  | 1.8    |
| Spot 203 | 10922452 | 8746233 | 7952.5   | 29.1 | 13.7 | 0.8 | 1.4 | 1.6  | 0.1 | 0.8 | 0.50278154  | 854.4  | 6.6  | 889.8  | 9.8  | 978.8  | 29.0  | 12.7   |
| Spot 204 | 4590856  | 3676161 | 11713.0  | 1.3  | 19.0 | 1.6 | 0.3 | 2.0  | 0.0 | 1.3 | 0.627068004 | 275.9  | 3.4  | 275.6  | 4.9  | 273.3  | 36.3  | -0.9   |
| Spot 205 | 2132488  | 1707605 | 21677.0  | 1.5  | 17.8 | 2.7 | 0.3 | 3.1  | 0.0 | 1.6 | 0.509443591 | 270.0  | 4.2  | 289.7  | 7.8  | 452.1  | 59.0  | 40.3   |
| Spot 206 | 1566871  | 1254683 | 31187.1  | 3.1  | 13.1 | 1.1 | 1.9 | 1.8  | 0.2 | 1.5 | 0.809187709 | 1041.2 | 14.3 | 1064.5 | 12.1 | 1112.3 | 21.5  | 6.4    |
| Spot 207 | 658603   | 527382  | 30995.5  | 2.7  | 12.1 | 1.3 | 2.2 | 2.3  | 0.2 | 1.8 | 0.813613377 | 1127.0 | 19.0 | 1177.5 | 15.8 | 1271.5 | 25.6  | 11.4   |
| Spot 208 | 2888554  | 2313030 | 17186.7  | 1.3  | 18.7 | 1.8 | 0.3 | 2.5  | 0.0 | 1.7 | 0.677032213 | 269.5  | 4.4  | 276.8  | 6.0  | 339.5  | 41.0  | 20.6   |
| Spot 209 | 1793908  | 1436485 | 318288.4 | 2.9  | 9.3  | 1.4 | 4.3 | 2.1  | 0.3 | 1.6 | 0.752818564 | 1614.1 | 22.3 | 1688.2 | 17.1 | 1781.4 | 24.9  | 9.4    |
| Spot 210 | 4548075  | 3641904 | 115382.2 | 8.1  | 12.8 | 1.0 | 2.0 | 1.7  | 0.2 | 1.5 | 0.836737779 | 1075.5 | 14.4 | 1105.0 | 11.7 | 1163.6 | 18.9  | 7.6    |
| Spot 211 | 2179698  | 1745409 | 14093.4  | 2.0  | 12.7 | 1.1 | 2.1 | 1.6  | 0.2 | 1.2 | 0.740102772 | 1123.3 | 12.5 | 1135.2 | 11.2 | 1158.0 | 21.8  | 3.0    |
| Spot 212 | 1375796  | 1101679 | 14326.6  | 2.7  | 12.4 | 1.4 | 2.0 | 2.2  | 0.2 | 1.8 | 0.782952172 | 1087.0 | 17.6 | 1128.3 | 15.3 | 1208.5 | 27.5  | 10.1   |
| Spot 214 | 3266663  | 2615804 | 37267.2  | 2.5  | 13.5 | 0.9 | 1.7 | 2.0  | 0.2 | 1.8 | 0.893963184 | 1000.2 | 16.3 | 1017.3 | 12.6 | 1054.2 | 17.7  | 5.1    |
| Spot 215 | 2322537  | 1859788 | 11533.6  | 1.0  | 16.6 | 2.2 | 0.6 | 2.6  | 0.1 | 1.2 | 0.474353061 | 467.9  | 5.5  | 490.1  | 10.0 | 595.5  | 49.0  | 21.4   |
| Spot 216 | 3243726  | 2597437 | 30184.8  | 4.1  | 18.1 | 4.8 | 0.1 | 5.7  | 0.0 | 2.9 | 0.514741485 | 72.1   | 2.1  | 83.5   | 4.5  | 422.3  | 108.3 | 82.9   |
| Spot 217 | 3461351  | 2771702 | 23764.1  | 1.1  | 10.1 | 0.9 | 3.5 | 2.1  | 0.3 | 1.8 | 0.89062725  | 1479.7 | 24.4 | 1533.8 | 16.4 | 1609.1 | 17.6  | 8.0    |
| Spot 218 | 1283182  | 1027517 | 14052.7  | 1.1  | 13.6 | 1.6 | 1.7 | 2.0  | 0.2 | 1.3 | 0.649085493 | 977.5  | 12.1 | 991.8  | 13.0 | 1023.6 | 31.6  | 4.5    |
| Spot 220 | 3402217  | 2724350 | 27525.9  | 3.7  | 12.6 | 0.6 | 2.1 | 1.3  | 0.2 | 1.2 | 0.872996093 | 1107.2 | 11.8 | 1133.9 | 9.1  | 1185.4 | 12.8  | 6.6    |
| Spot 221 | 1604634  | 1284922 | 2974.1   | 2.1  | 17.9 | 3.2 | 0.3 | 4.5  | 0.0 | 3.0 | 0.671863286 | 276.4  | 8.2  | 275.4  | 10.8 | 266.7  | 76.2  | -3.6   |
| Spot 222 | 3607290  | 2888564 | 213190.7 | 7.7  | 12.5 | 1.0 | 2.1 | 1.5  | 0.2 | 1.1 | 0.731546158 | 1098.4 | 10.9 | 1137.5 | 10.1 | 1212.8 | 19.7  | 9.4    |

|          |         |         |          |      |      |     |     |     |     |     |             |        |      |        |      |        |       |        |
|----------|---------|---------|----------|------|------|-----|-----|-----|-----|-----|-------------|--------|------|--------|------|--------|-------|--------|
| Spot 223 | 6785582 | 5433604 | 181607.0 | 1.6  | 13.9 | 1.3 | 1.0 | 2.2 | 0.1 | 1.8 | 0.816631919 | 596.2  | 10.3 | 689.9  | 11.0 | 1008.6 | 25.8  | 40.9   |
| Spot 224 | 2839653 | 2273873 | 11117.5  | 8.3  | 10.7 | 1.2 | 2.8 | 2.0 | 0.2 | 1.6 | 0.784726014 | 1276.0 | 18.1 | 1355.9 | 14.9 | 1484.1 | 23.4  | 14.0   |
| Spot 225 | 1672529 | 1339290 | 15671.4  | 3.2  | 13.6 | 0.9 | 1.7 | 1.6 | 0.2 | 1.3 | 0.821585832 | 1002.6 | 12.0 | 1006.7 | 10.1 | 1015.6 | 18.2  | 1.3    |
| Spot 226 | 1546107 | 1238056 | 18209.3  | 1.5  | 17.3 | 3.8 | 0.4 | 4.4 | 0.0 | 2.2 | 0.510241707 | 278.3  | 6.1  | 305.2  | 11.6 | 516.4  | 83.2  | 46.1   |
| Spot 227 | 3057117 | 2448009 | 16493.2  | 15.7 | 19.6 | 1.7 | 0.3 | 2.3 | 0.0 | 1.4 | 0.638381411 | 246.1  | 3.5  | 243.6  | 4.9  | 219.5  | 40.4  | -12.2  |
| Spot 228 | 1127907 | 903180  | 11301.2  | 2.7  | 10.3 | 1.3 | 3.3 | 2.3 | 0.2 | 1.9 | 0.832946565 | 1425.5 | 24.5 | 1481.3 | 17.9 | 1562.2 | 23.9  | 8.7    |
| Spot 229 | 1167416 | 934817  | 26975.4  | 0.8  | 16.4 | 5.4 | 0.3 | 6.7 | 0.0 | 4.0 | 0.59987954  | 189.5  | 7.5  | 227.1  | 13.7 | 637.1  | 116.0 | 70.3   |
| Spot 230 | 1147098 | 918547  | 10221.7  | 2.7  | 12.2 | 3.9 | 2.2 | 5.7 | 0.2 | 4.1 | 0.731665679 | 1153.5 | 43.8 | 1180.4 | 39.6 | 1230.1 | 75.9  | 6.2    |
| Spot 231 | 2417033 | 1935456 | 8707.3   | 1.7  | 18.5 | 2.2 | 0.3 | 2.9 | 0.0 | 1.8 | 0.625711111 | 274.3  | 4.8  | 279.5  | 7.0  | 323.2  | 50.7  | 15.1   |
| Spot 232 | 3152465 | 2524359 | 35892.4  | 1.4  | 18.2 | 1.9 | 0.3 | 2.2 | 0.0 | 1.0 | 0.462887015 | 276.6  | 2.7  | 291.3  | 5.5  | 410.7  | 43.1  | 32.6   |
| Spot 233 | 1110033 | 888867  | 5624.9   | 4.0  | 18.1 | 1.6 | 0.4 | 2.5 | 0.1 | 1.9 | 0.749153952 | 327.2  | 6.0  | 327.2  | 7.0  | 327.7  | 37.6  | 0.2    |
| Spot 234 | 5055850 | 4048508 | 87418.8  | 4.7  | 12.8 | 0.8 | 2.1 | 1.5 | 0.2 | 1.3 | 0.86159824  | 1128.1 | 13.2 | 1140.6 | 10.2 | 1164.4 | 14.9  | 3.1    |
| Spot 235 | 1642551 | 1315285 | 42989.4  | 0.9  | 13.9 | 1.5 | 1.6 | 2.2 | 0.2 | 1.6 | 0.72392496  | 986.7  | 14.5 | 989.4  | 13.8 | 995.2  | 30.7  | 0.9    |
| Spot 237 | 2190194 | 1753814 | 29840.0  | 3.5  | 12.9 | 1.0 | 2.1 | 2.0 | 0.2 | 1.7 | 0.84883966  | 1158.5 | 17.7 | 1149.3 | 13.6 | 1132.1 | 20.7  | -2.3   |
| Spot 239 | 1486857 | 1190612 | 23165.4  | 2.0  | 13.9 | 1.0 | 1.6 | 2.1 | 0.2 | 1.9 | 0.888546884 | 948.6  | 16.5 | 960.4  | 13.1 | 987.6  | 19.7  | 4.0    |
| Spot 240 | 1163021 | 931298  | 99915.5  | 1.7  | 17.8 | 2.7 | 0.3 | 3.4 | 0.0 | 2.1 | 0.612658426 | 261.8  | 5.4  | 284.2  | 8.4  | 472.8  | 59.6  | 44.6   |
| Spot 243 | 3236430 | 2591595 | 9324.2   | 1.7  | 18.6 | 1.3 | 0.3 | 2.3 | 0.0 | 1.6 | 0.661258418 | 276.7  | 4.2  | 279.7  | 5.7  | 305.0  | 40.2  | 9.3    |
| Spot 244 | 6835422 | 5473514 | 40266.0  | 3.6  | 12.3 | 0.9 | 2.0 | 1.5 | 0.2 | 1.2 | 0.77629438  | 1044.0 | 11.2 | 1105.4 | 10.1 | 1228.2 | 18.5  | 15.0   |
| Spot 245 | 2304645 | 1845461 | 25018.7  | 2.4  | 10.9 | 0.7 | 3.0 | 1.6 | 0.2 | 1.4 | 0.882860113 | 1378.3 | 17.1 | 1413.2 | 11.9 | 1466.4 | 13.9  | 6.0    |
| Spot 246 | 1600367 | 1281506 | 10243.7  | 0.7  | 19.1 | 2.8 | 0.3 | 3.5 | 0.0 | 2.1 | 0.600633166 | 261.6  | 5.4  | 260.7  | 8.1  | 253.5  | 64.8  | -3.2   |
| Spot 247 | 3236283 | 2591477 | 3918.9   | 8.8  | 18.9 | 2.0 | 0.2 | 3.0 | 0.0 | 2.1 | 0.693849466 | 228.4  | 4.7  | 223.0  | 6.0  | 166.8  | 50.5  | -36.9  |
| Spot 248 | 8283449 | 6633032 | 45694.7  | 7.0  | 12.9 | 0.8 | 2.1 | 1.5 | 0.2 | 1.2 | 0.834054742 | 1158.5 | 13.0 | 1149.0 | 10.1 | 1131.0 | 16.1  | -2.4   |
| Spot 249 | 5051681 | 4045170 | 14458.3  | 8.1  | 19.7 | 1.3 | 0.3 | 1.9 | 0.0 | 1.3 | 0.673306844 | 236.1  | 2.9  | 232.4  | 3.9  | 195.0  | 32.0  | -21.0  |
| Spot 251 | 970953  | 777498  | 14514.4  | 2.2  | 11.4 | 1.2 | 2.7 | 2.3 | 0.2 | 2.0 | 0.841819726 | 1303.5 | 23.2 | 1329.8 | 17.3 | 1372.3 | 24.2  | 5.0    |
| Spot 252 | 1454693 | 1164856 | 924233.1 | 2.7  | 11.8 | 1.1 | 2.6 | 1.7 | 0.2 | 1.4 | 0.788578781 | 1286.3 | 16.1 | 1297.2 | 12.8 | 1315.2 | 20.8  | 2.2    |
| Spot 253 | 909580  | 728353  | 11761.0  | 2.7  | 14.2 | 1.3 | 1.5 | 1.8 | 0.2 | 1.2 | 0.656604547 | 931.9  | 10.3 | 928.8  | 11.0 | 921.4  | 28.1  | -1.1   |
| Spot 254 | 1916830 | 1534916 | 2277.1   | 1.1  | 18.5 | 1.1 | 0.3 | 2.1 | 0.0 | 1.7 | 0.791534703 | 273.3  | 4.5  | 255.4  | 4.8  | 93.6   | 30.7  | -191.9 |
| Spot 255 | 1395409 | 1117384 | 20802.3  | 1.4  | 12.7 | 1.0 | 2.2 | 1.6 | 0.2 | 1.2 | 0.782082773 | 1168.3 | 13.1 | 1165.1 | 10.8 | 1159.0 | 19.3  | -0.8   |
| Spot 256 | 6634956 | 5312989 | 56692.0  | 3.4  | 12.6 | 1.0 | 2.3 | 1.5 | 0.2 | 1.2 | 0.787803033 | 1218.1 | 13.5 | 1206.1 | 10.9 | 1184.8 | 18.8  | -2.8   |
| Spot 259 | 1704155 | 1364614 | 13118.9  | 1.9  | 13.7 | 1.1 | 1.7 | 2.0 | 0.2 | 1.7 | 0.83202172  | 1016.8 | 15.9 | 1011.4 | 13.0 | 999.7  | 22.9  | -1.7   |
| Spot 260 | 3062788 | 2452550 | 35211.3  | 1.2  | 20.1 | 1.4 | 0.3 | 2.1 | 0.0 | 1.5 | 0.716006698 | 230.9  | 3.4  | 227.2  | 4.2  | 188.5  | 33.6  | -22.5  |
| Spot 261 | 2907724 | 2328381 | 36379.8  | 2.5  | 8.8  | 0.8 | 4.3 | 1.9 | 0.3 | 1.7 | 0.893849938 | 1564.0 | 23.4 | 1698.0 | 15.6 | 1867.6 | 15.3  | 16.3   |
| Spot 262 | 1845344 | 1477672 | 28085.2  | 3.5  | 11.6 | 0.8 | 2.8 | 1.5 | 0.2 | 1.2 | 0.822823017 | 1340.1 | 14.7 | 1343.9 | 11.0 | 1350.1 | 16.2  | 0.7    |
| Spot 263 | 1471437 | 1178264 | 9372.4   | 0.7  | 16.9 | 1.3 | 0.8 | 1.8 | 0.1 | 1.2 | 0.662666501 | 579.4  | 6.7  | 569.8  | 7.9  | 531.4  | 29.9  | -9.0   |
| Spot 264 | 4397447 | 3521288 | 5747.3   | 3.8  | 19.2 | 1.6 | 0.3 | 3.3 | 0.0 | 1.3 | 0.395713798 | 288.8  | 3.7  | 278.8  | 8.0  | 195.4  | 70.0  | -47.8  |
| Spot 265 | 582299  | 466280  | 356343.5 | 0.9  | 12.9 | 1.0 | 2.1 | 2.6 | 0.2 | 2.4 | 0.914638353 | 1155.3 | 24.9 | 1151.0 | 17.7 | 1143.0 | 20.7  | -1.1   |
| Spot 266 | 3137339 | 2512247 | 8401.8   | 5.0  | 18.6 | 2.5 | 0.3 | 3.7 | 0.0 | 2.6 | 0.699339711 | 237.6  | 6.1  | 244.0  | 8.1  | 305.4  | 60.6  | 22.2   |
| Spot 267 | 353571  | 283124  | 4043.2   | 2.3  | 14.3 | 1.7 | 1.3 | 3.2 | 0.1 | 2.7 | 0.835959959 | 829.4  | 20.9 | 831.2  | 18.2 | 836.2  | 36.7  | 0.8    |
| Spot 268 | 809583  | 648280  | 8095.8   | 3.4  | 14.3 | 1.5 | 1.4 | 2.3 | 0.2 | 1.7 | 0.757566954 | 907.8  | 14.5 | 904.5  | 13.6 | 896.4  | 30.5  | -1.3   |
| Spot 269 | 2135634 | 1710124 | 28578.2  | 4.0  | 12.5 | 0.9 | 2.2 | 1.4 | 0.2 | 1.1 | 0.785830859 | 1188.3 | 12.0 | 1190.9 | 9.9  | 1195.8 | 17.2  | 0.6    |
| Spot 270 | 675716  | 541085  | 15136.6  | 1.2  | 15.4 | 7.5 | 0.3 | 9.2 | 0.0 | 5.2 | 0.570774147 | 187.7  | 9.7  | 237.2  | 19.4 | 760.7  | 159.1 | 75.3   |
| Spot 271 | 414452  | 331875  | 5211.6   | 1.9  | 12.4 | 1.9 | 2.0 | 3.3 | 0.2 | 2.2 | 0.681697891 | 1085.2 | 22.1 | 1110.1 | 21.9 | 1159.2 | 47.2  | 6.4    |
| Spot 272 | 2766526 | 2215316 | 115278.1 | 2.1  | 11.5 | 1.1 | 2.6 | 2.6 | 0.2 | 2.4 | 0.904918499 | 1273.6 | 27.7 | 1309.5 | 19.5 | 1368.7 | 21.7  | 6.9    |

|          |         |         |          |      |      |     |     |     |     |     |             |        |      |        |      |        |       |       |
|----------|---------|---------|----------|------|------|-----|-----|-----|-----|-----|-------------|--------|------|--------|------|--------|-------|-------|
| Spot 273 | 2340174 | 1873911 | 78644.4  | 4.4  | 12.5 | 0.9 | 2.2 | 1.6 | 0.2 | 1.3 | 0.811551344 | 1167.7 | 14.0 | 1184.1 | 11.3 | 1214.2 | 18.6  | 3.8   |
| Spot 274 | 6298958 | 5043936 | 28927.1  | 0.8  | 19.2 | 1.1 | 0.3 | 1.9 | 0.0 | 1.5 | 0.788770345 | 273.2  | 4.0  | 274.6  | 4.5  | 286.8  | 26.4  | 4.7   |
| Spot 276 | 525449  | 420757  | 5156.1   | 2.6  | 13.8 | 2.8 | 1.4 | 4.4 | 0.1 | 3.3 | 0.74496406  | 846.7  | 25.9 | 870.5  | 25.6 | 931.5  | 60.0  | 9.1   |
| Spot 277 | 2855067 | 2286215 | 7075.3   | 1.8  | 19.7 | 0.9 | 0.3 | 1.6 | 0.0 | 1.3 | 0.808666011 | 270.9  | 3.5  | 259.1  | 3.7  | 153.2  | 22.3  | -76.8 |
| Spot 278 | 661701  | 529862  | 30510.7  | 1.7  | 12.2 | 2.6 | 2.1 | 3.0 | 0.2 | 1.5 | 0.505817156 | 1114.5 | 15.7 | 1164.5 | 21.1 | 1258.7 | 51.3  | 11.5  |
| Spot 279 | 5281350 | 4229079 | 69389.8  | 2.7  | 12.7 | 1.0 | 2.1 | 1.4 | 0.2 | 1.0 | 0.707561984 | 1127.5 | 10.5 | 1147.9 | 9.9  | 1186.6 | 20.0  | 5.0   |
| Spot 280 | 581096  | 465317  | 8439.4   | 2.1  | 12.7 | 1.3 | 2.0 | 1.9 | 0.2 | 1.2 | 0.640146543 | 1120.2 | 12.6 | 1129.8 | 13.0 | 1148.3 | 29.1  | 2.4   |
| Spot 281 | 3727073 | 2984481 | 56733.6  | 2.3  | 12.3 | 0.9 | 2.2 | 1.7 | 0.2 | 1.4 | 0.828363925 | 1159.7 | 14.8 | 1186.5 | 11.8 | 1235.6 | 18.5  | 6.1   |
| Spot 283 | 2237625 | 1791794 | 34674.3  | 1.1  | 17.1 | 1.5 | 0.6 | 2.2 | 0.1 | 1.6 | 0.728931812 | 456.3  | 7.0  | 471.2  | 8.3  | 544.9  | 32.9  | 16.3  |
| Spot 285 | 2161619 | 1730932 | 5536.6   | 4.1  | 16.8 | 1.2 | 0.6 | 2.1 | 0.1 | 1.7 | 0.801548945 | 496.2  | 8.0  | 496.6  | 8.2  | 498.9  | 27.6  | 0.5   |
| Spot 287 | 2874526 | 2301798 | 687.5    | 2.3  | 17.1 | 4.5 | 0.1 | 5.6 | 0.0 | 3.2 | 0.568114443 | 69.3   | 2.2  | 54.3   | 3.0  | NA     | NA    |       |
| Spot 289 | 8507118 | 6812136 | 18417.0  | 2.3  | 19.7 | 2.0 | 0.1 | 2.8 | 0.0 | 2.0 | 0.719737507 | 72.9   | 1.5  | 77.3   | 2.1  | 212.7  | 45.4  | 65.7  |
| Spot 290 | 900955  | 721446  | 32108.3  | 1.6  | 7.8  | 0.8 | 6.5 | 1.4 | 0.4 | 1.1 | 0.806232829 | 2022.2 | 19.3 | 2048.8 | 12.1 | 2075.8 | 14.3  | 2.6   |
| Spot 291 | 1445142 | 1157208 | 375210.8 | 3.3  | 11.8 | 1.6 | 2.6 | 2.5 | 0.2 | 2.0 | 0.776713822 | 1279.4 | 22.8 | 1294.0 | 18.5 | 1318.2 | 30.9  | 2.9   |
| Spot 292 | 6761775 | 5414540 | 35374.4  | 4.2  | 18.2 | 1.3 | 0.3 | 2.0 | 0.0 | 1.5 | 0.757958687 | 267.5  | 4.0  | 282.9  | 5.0  | 412.2  | 29.4  | 35.1  |
| Spot 293 | 1798971 | 1440539 | 10561.3  | 1.5  | 16.5 | 2.3 | 0.6 | 3.2 | 0.1 | 2.3 | 0.705081103 | 483.5  | 10.6 | 501.9  | 12.8 | 587.0  | 49.9  | 17.6  |
| Spot 294 | 1033952 | 827945  | 7685.7   | 5.2  | 16.7 | 2.8 | 0.5 | 4.0 | 0.1 | 2.5 | 0.633831482 | 377.0  | 9.2  | 402.2  | 13.1 | 549.9  | 66.8  | 31.5  |
| Spot 296 | 623702  | 499434  | 12784.3  | 1.0  | 12.8 | 2.2 | 1.7 | 3.7 | 0.2 | 3.0 | 0.795391395 | 952.7  | 26.2 | 1011.9 | 23.8 | 1142.3 | 44.8  | 16.6  |
| Spot 297 | 5963691 | 4775469 | 39594.7  | 1.3  | 9.6  | 1.4 | 3.9 | 2.2 | 0.3 | 1.6 | 0.751627949 | 1550.3 | 22.3 | 1615.6 | 17.4 | 1701.7 | 26.2  | 8.9   |
| Spot 298 | 3432841 | 2748872 | 132671.1 | 3.4  | 13.1 | 1.2 | 2.0 | 2.0 | 0.2 | 1.7 | 0.819090774 | 1137.4 | 17.4 | 1131.2 | 13.9 | 1119.3 | 23.3  | -1.6  |
| Spot 300 | 4439323 | 3554820 | 17217.2  | 1.4  | 17.3 | 1.3 | 0.5 | 2.2 | 0.1 | 1.7 | 0.794723123 | 389.2  | 6.5  | 406.9  | 7.3  | 508.4  | 29.0  | 23.4  |
| Spot 301 | 2992575 | 2396326 | 28124.1  | 3.6  | 10.7 | 2.7 | 2.7 | 3.0 | 0.2 | 1.4 | 0.477668934 | 1233.1 | 16.2 | 1334.6 | 22.4 | 1501.4 | 50.2  | 17.9  |
| Spot 302 | 1498879 | 1200238 | 10773.3  | 3.4  | 13.5 | 0.9 | 1.8 | 1.6 | 0.2 | 1.4 | 0.846567743 | 1041.5 | 13.1 | 1035.7 | 10.5 | 1023.5 | 17.4  | -1.8  |
| Spot 303 | 3162860 | 2532683 | 56269.3  | 9.1  | 18.8 | 2.0 | 0.3 | 2.4 | 0.0 | 1.3 | 0.548295832 | 235.4  | 3.1  | 245.7  | 5.3  | 344.8  | 46.0  | 31.7  |
| Spot 304 | 766767  | 613994  | 51694.4  | 1.2  | 13.9 | 1.6 | 1.7 | 2.3 | 0.2 | 1.7 | 0.717110036 | 1033.4 | 16.0 | 1020.1 | 15.1 | 991.7  | 33.2  | -4.2  |
| Spot 305 | 3196850 | 2559901 | 34204.1  | 2.7  | 12.7 | 2.4 | 0.8 | 3.0 | 0.1 | 1.8 | 0.594819851 | 464.8  | 8.0  | 605.0  | 13.7 | 1172.4 | 48.0  | 60.4  |
| Spot 307 | 3295149 | 2638615 | 34784.6  | 18.1 | 13.7 | 0.9 | 1.7 | 1.5 | 0.2 | 1.2 | 0.811377961 | 981.9  | 11.3 | 993.9  | 9.7  | 1020.4 | 18.1  | 3.8   |
| Spot 308 | 759801  | 608416  | 4773.6   | 0.7  | 19.3 | 5.1 | 0.2 | 7.4 | 0.0 | 5.4 | 0.727532707 | 204.9  | 10.8 | 201.7  | 13.5 | 164.3  | 118.6 | -24.7 |
| Spot 309 | 899290  | 720113  | 9123.0   | 1.9  | 13.9 | 3.2 | 1.4 | 3.8 | 0.1 | 2.1 | 0.544367797 | 890.1  | 17.4 | 909.0  | 23.1 | 955.1  | 66.0  | 6.8   |
| Spot 310 | 600741  | 481047  | 10015.7  | 3.5  | 12.8 | 1.8 | 1.9 | 2.5 | 0.2 | 1.5 | 0.616170694 | 1070.1 | 14.9 | 1093.5 | 16.5 | 1140.3 | 38.5  | 6.2   |
| Spot 311 | 1915749 | 1534050 | 4885.4   | 1.1  | 17.1 | 2.3 | 0.5 | 4.3 | 0.1 | 2.4 | 0.564234314 | 438.0  | 10.3 | 441.8  | 15.4 | 461.5  | 78.7  | 5.1   |
| Spot 312 | 3208438 | 2569180 | 30039.3  | 1.4  | 19.5 | 1.0 | 0.3 | 1.4 | 0.0 | 1.0 | 0.68905515  | 269.2  | 2.6  | 268.4  | 3.4  | 261.4  | 23.9  | -3.0  |
| Spot 313 | 5791383 | 4637492 | 113917.5 | 2.4  | 12.4 | 1.0 | 2.1 | 1.6 | 0.2 | 1.2 | 0.785341115 | 1131.9 | 12.7 | 1164.7 | 10.8 | 1226.2 | 19.0  | 7.7   |
| Spot 314 | 2126240 | 1702602 | 15514.8  | 2.0  | 19.2 | 1.7 | 0.3 | 2.4 | 0.0 | 1.7 | 0.71162806  | 284.4  | 4.8  | 284.0  | 6.0  | 280.5  | 39.2  | -1.4  |
| Spot 315 | 1385364 | 1109341 | 38436.4  | 13.4 | 13.2 | 1.0 | 1.6 | 2.8 | 0.2 | 2.6 | 0.925587593 | 905.1  | 21.6 | 964.2  | 17.2 | 1101.4 | 20.9  | 17.8  |

**Run 2 NMBA (discordant)**

|          |          |         |          |      |      |     |     |      |     |      |             |        |       |        |      |        |      |        |
|----------|----------|---------|----------|------|------|-----|-----|------|-----|------|-------------|--------|-------|--------|------|--------|------|--------|
| Spot 1   | 5899183  | 4723814 | 40478.1  | 4.5  | 6.1  | 0.9 | 4.7 | 2.7  | 0.2 | 2.6  | 0.944988191 | 1209.2 | 28.3  | 1761.6 | 22.7 | 2498.3 | 14.9 | 51.6   |
| Spot 103 | 1033162  | 827312  | 23668.8  | 1.4  | 13.1 | 2.9 | 2.1 | 4.3  | 0.2 | 3.2  | 0.736417765 | 1176.5 | 33.9  | 1150.5 | 29.5 | 1101.9 | 57.9 | -6.8   |
| Spot 106 | 223862   | 179259  | 16823.3  | 2.9  | 13.9 | 2.8 | 1.3 | 5.4  | 0.1 | 4.6  | 0.860251322 | 787.6  | 34.4  | 842.3  | 30.9 | 989.6  | 56.0 | 20.4   |
| Spot 12  | 393275   | 314918  | 3570.1   | 1.3  | 20.6 | 2.8 | 0.3 | 6.9  | 0.0 | 6.3  | 0.912108819 | 278.2  | 17.0  | 262.0  | 15.9 | 119.6  | 66.3 | -132.6 |
| Spot 121 | 11016189 | 8821294 | 135660.8 | 24.5 | 13.8 | 0.8 | 2.0 | 1.4  | 0.2 | 1.2  | 0.810776541 | 1148.5 | 12.2  | 1099.9 | 9.6  | 1004.8 | 17.0 | -14.3  |
| Spot 123 | 10424032 | 8347120 | 31807.7  | 13.1 | 10.0 | 1.1 | 2.2 | 2.1  | 0.2 | 1.8  | 0.857928572 | 958.3  | 15.7  | 1186.0 | 14.4 | 1628.9 | 19.6 | 41.2   |
| Spot 138 | 4439566  | 3555015 | 59616.5  | 8.9  | 29.5 | 1.6 | 0.3 | 30.0 | 0.1 | 30.0 | 0.998577791 | 348.8  | 101.9 | 234.7  | 63.0 | NA     | NA   |        |

|              |          |         |           |      |      |      |     |      |     |      |             |        |       |        |       |        |       |         |
|--------------|----------|---------|-----------|------|------|------|-----|------|-----|------|-------------|--------|-------|--------|-------|--------|-------|---------|
| Spot 145     | 1248748  | 999944  | 2202.9    | 4.9  | 11.2 | 5.8  | 2.0 | 6.4  | 0.2 | 2.6  | 0.413376682 | 991.1  | 24.3  | 1131.0 | 43.7  | 1410.4 | 111.6 | 29.7    |
| Spot 154     | 969812   | 776584  | 424047.7  | 52.0 | 11.1 | 0.9  | 1.9 | 1.4  | 0.2 | 1.1  | 0.793660327 | 930.8  | 9.8   | 1089.4 | 9.5   | 1421.8 | 16.6  | 34.5    |
| Spot 156     | 8954189  | 7170132 | 4375.6    | 0.8  | 26.0 | 4.2  | 0.2 | 30.3 | 0.0 | 30.0 | 0.990156145 | 233.2  | 68.7  | 180.9  | 50.2  | NA     | NA    |         |
| Spot 157     | 780776   | 625212  | 4594.8    | 3.1  | 12.7 | 4.1  | 1.3 | 4.3  | 0.1 | 1.2  | 0.268504819 | 724.7  | 7.9   | 840.5  | 24.6  | 1160.0 | 82.3  | 37.5    |
| Spot 16      | 4046978  | 3240647 | 1734.3    | 1.3  | 14.1 | 2.8  | 1.7 | 3.5  | 0.2 | 2.0  | 0.576623193 | 1029.1 | 19.0  | 1006.3 | 22.1  | 957.1  | 57.7  | -7.5    |
| Spot 161     | 1059616  | 848495  | 15410.8   | 2.4  | 14.1 | 3.6  | 2.1 | 11.7 | 0.2 | 11.1 | 0.951091625 | 1233.2 | 124.4 | 1135.7 | 79.8  | 953.7  | 73.6  | -29.3   |
| Spot 170     | 2545982  | 2038714 | 99737.4   | 4.6  | 13.8 | 1.5  | 1.2 | 2.3  | 0.1 | 1.7  | 0.749323796 | 708.9  | 11.5  | 783.7  | 12.5  | 1002.7 | 30.8  | 29.3    |
| Spot 175     | 1178657  | 943818  | 11220.0   | 3.8  | 13.2 | 3.6  | 2.1 | 6.0  | 0.2 | 4.8  | 0.804864508 | 1193.3 | 52.5  | 1155.7 | 41.3  | 1086.0 | 71.2  | -9.9    |
| Spot 18      | 3078451  | 2465092 | 43756.7   | 1.7  | 20.7 | 2.7  | 1.9 | 17.2 | 0.3 | 17.0 | 0.987620744 | 1624.9 | 244.0 | 1084.2 | 115.0 | 113.9  | 63.6  | -1327.2 |
| Spot 180     | 446286   | 357367  | 3632.8    | 2.7  | 14.9 | 3.5  | 1.4 | 4.0  | 0.1 | 1.9  | 0.479807785 | 887.2  | 16.0  | 875.0  | 23.6  | 844.5  | 73.6  | -5.1    |
| Spot 185     | 10800404 | 8648502 | 85823.4   | 8.0  | 14.3 | 0.9  | 1.6 | 1.5  | 0.2 | 1.2  | 0.82367073  | 1010.2 | 11.6  | 983.9  | 9.5   | 925.9  | 17.6  | -9.1    |
| Spot 192     | 4363832  | 3494370 | 64196.5   | 3.5  | 13.3 | 1.3  | 1.3 | 2.0  | 0.1 | 1.5  | 0.761071672 | 750.6  | 10.7  | 838.5  | 11.3  | 1079.1 | 25.7  | 30.4    |
| Spot 213     | 643504   | 515291  | 934.9     | 1.2  | 34.2 | 5.7  | 0.2 | 8.9  | 0.1 | 6.9  | 0.768120718 | 377.4  | 25.1  | 221.0  | 17.7  | NA     | NA    |         |
| Spot 219     | 565717   | 453002  | 20985.2   | 1.4  | 15.9 | 4.1  | 1.3 | 8.9  | 0.2 | 7.9  | 0.887139916 | 904.3  | 66.6  | 849.0  | 51.3  | 707.3  | 87.4  | -27.9   |
| Spot 236     | 411312   | 329361  | 3232.1    | 3.1  | 15.2 | 3.6  | 1.3 | 5.4  | 0.1 | 4.0  | 0.743349589 | 882.9  | 33.1  | 860.1  | 31.4  | 801.6  | 75.7  | -10.1   |
| Spot 238     | 12035973 | 9637893 | 480607.5  | 0.8  | 13.7 | 0.8  | 1.9 | 1.2  | 0.2 | 0.9  | 0.767708987 | 1128.9 | 9.5   | 1092.1 | 8.0   | 1019.4 | 15.5  | -10.7   |
| Spot 241     | 266268   | 213216  | 2874.3    | 1.3  | 13.7 | 2.0  | 1.9 | 2.6  | 0.2 | 1.6  | 0.630510875 | 1121.8 | 17.0  | 1085.6 | 17.4  | 1013.9 | 41.1  | -10.6   |
| Spot 242     | 3690641  | 2955308 | 338.0     | 2.9  | 5.1  | 32.8 | 0.9 | 33.1 | 0.0 | 4.2  | 0.127933715 | 199.7  | 8.3   | 629.0  | 156.4 | 2808.3 | 553.9 | 92.9    |
| Spot 250     | 560972   | 449202  | 16480.0   | 0.3  | 13.3 | 2.5  | 1.4 | 4.0  | 0.1 | 3.1  | 0.772166465 | 831.8  | 23.8  | 901.5  | 23.6  | 1076.5 | 50.4  | 22.7    |
| Spot 257     | 1012892  | 811080  | 5840.8    | 1.2  | 23.8 | 3.6  | 0.2 | 15.5 | 0.0 | 15.1 | 0.972659886 | 190.4  | 28.3  | 162.7  | 23.3  | NA     | NA    |         |
| Spot 258     | 793508   | 635407  | 13996.8   | 3.6  | 13.4 | 1.9  | 2.0 | 2.8  | 0.2 | 2.1  | 0.751587234 | 1123.1 | 22.0  | 1098.8 | 19.1  | 1051.1 | 37.7  | -6.8    |
| Spot 275     | 387021   | 309910  | 6278.2    | 2.0  | 13.2 | 1.6  | 2.1 | 2.5  | 0.2 | 2.0  | 0.785904688 | 1195.8 | 21.6  | 1158.4 | 17.4  | 1089.0 | 31.1  | -9.8    |
| Spot 282     | 3588339  | 2873388 | 7784.9    | 0.8  | 20.6 | 2.7  | 0.3 | 8.9  | 0.0 | 8.4  | 0.95273762  | 280.9  | 23.2  | 264.9  | 20.6  | 125.5  | 63.3  | -123.9  |
| Spot 284     | 381968   | 305864  | 5496.8    | 0.9  | 14.5 | 4.2  | 1.5 | 8.4  | 0.2 | 7.3  | 0.86968868  | 938.7  | 64.1  | 927.1  | 51.3  | 899.7  | 85.9  | -4.3    |
| Spot 286     | 8310852  | 6654975 | 20193.1   | 17.1 | 25.6 | 1.8  | 0.3 | 29.9 | 0.0 | 29.9 | 0.998130199 | 303.3  | 88.5  | 234.2  | 62.7  | NA     | NA    |         |
| Spot 288     | 1255080  | 1005014 | 22216.7   | 1.9  | 20.7 | 2.7  | 0.3 | 18.3 | 0.0 | 18.0 | 0.988969379 | 296.6  | 52.3  | 276.8  | 44.2  | 112.8  | 63.8  | -162.9  |
| Spot 295     | 2787870  | 2232407 | 41209.9   | 2.2  | 6.5  | 1.0  | 6.5 | 1.9  | 0.3 | 1.6  | 0.848676968 | 1725.0 | 24.7  | 2049.7 | 16.9  | 2394.2 | 17.3  | 28.0    |
| Spot 299     | 1548574  | 1240031 | 332.7     | 2.2  | 4.9  | 16.6 | 8.5 | 18.0 | 0.3 | 7.0  | 0.388377772 | 1707.9 | 105.2 | 2287.9 | 165.4 | 2855.8 | 272.8 | 40.2    |
| Spot 30      | 5436753  | 4353520 | 1936.6    | 1.2  | 23.0 | 10.6 | 0.2 | 30.5 | 0.0 | 28.6 | 0.937523225 | 251.8  | 70.7  | 217.1  | 59.8  | NA     | NA    |         |
| Spot 306     | 1299548  | 1040622 | 41200.8   | 5.1  | 5.4  | 1.6  | 5.5 | 4.3  | 0.2 | 4.0  | 0.930377403 | 1271.5 | 46.4  | 1908.1 | 37.2  | 2694.2 | 26.2  | 52.8    |
| Spot 53      | 11214564 | 8980144 | 216863.6  | 36.9 | 14.4 | 1.6  | 1.7 | 2.4  | 0.2 | 1.8  | 0.754847348 | 1050.9 | 17.6  | 1005.9 | 15.4  | 909.2  | 32.5  | -15.6   |
| Spot 65      | 2149496  | 1721225 | 6273.4    | 2.0  | 32.2 | 3.4  | 0.1 | 30.2 | 0.0 | 30.0 | 0.993679468 | 172.3  | 51.0  | 111.4  | 31.9  | NA     | NA    |         |
| Spot 75      | 4963931  | 3974903 | 23394.2   | 2.7  | 12.6 | 1.0  | 1.7 | 2.1  | 0.2 | 1.9  | 0.8715961   | 933.6  | 16.1  | 1008.9 | 13.6  | 1176.5 | 20.7  | 20.6    |
| Spot 83      | 527334   | 422267  | 527571.1  | 1.3  | 12.5 | 4.1  | 1.7 | 5.1  | 0.2 | 3.0  | 0.596382473 | 920.1  | 25.9  | 1003.8 | 32.3  | 1191.3 | 80.2  | 22.8    |
| Spot 91      | 8167170  | 6539921 | 1571922.4 | 15.1 | 8.5  | 0.9  | 3.4 | 1.8  | 0.2 | 1.6  | 0.872629151 | 1237.9 | 17.8  | 1512.7 | 14.3  | 1921.7 | 15.9  | 35.6    |
| Spot 96      | 1982170  | 1587237 | 38280.2   | 5.9  | 11.8 | 1.0  | 2.8 | 1.8  | 0.2 | 1.5  | 0.842388581 | 1389.9 | 19.0  | 1357.6 | 13.5  | 1307.1 | 18.9  | -6.3    |
| <b>Run 3</b> |          |         |           |      |      |      |     |      |     |      |             |        |       |        |       |        |       |         |
| Spot 1       | 8180843  | 6850867 | 12977.1   | 11.9 | 20.2 | 0.9  | 0.3 | 1.9  | 0.0 | 1.5  | 0.758160384 | 248.2  | 3.5   | 237.0  | 4.0   | 127.6  | 29.4  | -94.5   |
| Spot 2       | 1728089  | 1447150 | 2474.8    | 1.7  | 18.3 | 3.4  | 0.2 | 5.7  | 0.0 | 2.5  | 0.431696561 | 168.8  | 4.1   | 166.9  | 8.8   | 140.4  | 121.6 | -20.2   |
| Spot 3       | 2553928  | 2138731 | 6916.5    | 1.0  | 19.1 | 2.6  | 0.3 | 2.9  | 0.0 | 1.3  | 0.46226276  | 257.0  | 3.4   | 253.0  | 6.5   | 215.8  | 59.6  | -19.1   |
| Spot 4       | 3386202  | 2835701 | 9536.5    | 1.7  | 19.1 | 1.5  | 0.3 | 2.1  | 0.0 | 1.3  | 0.634866893 | 252.6  | 3.3   | 251.6  | 4.7   | 242.5  | 37.6  | -4.1    |
| Spot 5       | 8490427  | 7110121 | 28064.2   | 0.7  | 20.7 | 1.2  | 0.2 | 1.7  | 0.0 | 1.2  | 0.698019814 | 157.5  | 1.8   | 153.8  | 2.4   | 97.6   | 28.6  | -61.3   |
| Spot 6       | 5747073  | 4812760 | 37332.0   | 11.9 | 12.5 | 0.8  | 2.2 | 1.5  | 0.2 | 1.3  | 0.842048307 | 1158.4 | 13.8  | 1168.8 | 10.8  | 1188.3 | 16.5  | 2.5     |

|         |         |         |           |     |      |      |     |      |     |     |             |        |      |        |      |        |       |       |
|---------|---------|---------|-----------|-----|------|------|-----|------|-----|-----|-------------|--------|------|--------|------|--------|-------|-------|
| Spot 7  | 4609062 | 3859758 | 56325.3   | 1.1 | 19.2 | 1.2  | 0.3 | 1.8  | 0.0 | 1.4 | 0.760239921 | 261.0  | 3.5  | 263.8  | 4.1  | 289.2  | 26.5  | 9.8   |
| Spot 8  | 2146387 | 1797444 | 2066.6    | 0.9 | 19.5 | 1.7  | 0.2 | 6.7  | 0.0 | 1.4 | 0.210483797 | 199.1  | 2.8  | 177.8  | 10.9 | NA     | NA    |       |
| Spot 9  | 835802  | 699924  | 39327.0   | 1.5 | 13.4 | 1.3  | 1.7 | 2.0  | 0.2 | 1.5 | 0.761142706 | 973.7  | 13.9 | 994.9  | 12.8 | 1042.0 | 26.4  | 6.5   |
| Spot 10 | 1491156 | 1248736 | 8198.4    | 2.1 | 19.2 | 1.5  | 0.4 | 2.7  | 0.1 | 2.0 | 0.752649085 | 340.3  | 6.6  | 322.0  | 7.3  | 192.1  | 40.6  | -77.1 |
| Spot 11 | 1531116 | 1282200 | 16406.9   | 2.0 | 9.6  | 0.8  | 4.2 | 1.7  | 0.3 | 1.5 | 0.888924139 | 1678.7 | 22.4 | 1674.0 | 14.0 | 1668.1 | 14.5  | -0.6  |
| Spot 12 | 5985781 | 5012661 | 305095.9  | 2.1 | 14.1 | 0.6  | 1.6 | 1.5  | 0.2 | 1.4 | 0.916766113 | 964.4  | 12.2 | 959.9  | 9.3  | 949.5  | 12.2  | -1.6  |
| Spot 14 | 4790936 | 4012064 | 23230.3   | 7.4 | 16.7 | 0.8  | 0.8 | 1.7  | 0.1 | 1.5 | 0.866380813 | 599.9  | 8.3  | 593.6  | 7.5  | 569.3  | 18.2  | -5.4  |
| Spot 15 | 833157  | 697709  | 15829.6   | 1.9 | 18.6 | 3.6  | 0.3 | 4.2  | 0.0 | 2.1 | 0.509676048 | 275.9  | 5.7  | 279.7  | 10.2 | 311.5  | 81.6  | 11.5  |
| Spot 16 | 6393981 | 5354499 | 14709.6   | 2.0 | 19.1 | 1.3  | 0.3 | 1.8  | 0.0 | 1.1 | 0.629292683 | 274.6  | 3.1  | 271.6  | 4.3  | 245.6  | 32.4  | -11.8 |
| Spot 17 | 5402452 | 4524165 | 9307.1    | 1.9 | 19.3 | 1.5  | 0.3 | 2.3  | 0.0 | 1.3 | 0.548157533 | 280.6  | 3.5  | 272.0  | 5.5  | 198.5  | 44.7  | -41.4 |
| Spot 20 | 3589540 | 3005981 | 42970.1   | 6.5 | 12.8 | 0.9  | 1.8 | 1.8  | 0.2 | 1.5 | 0.862556631 | 1015.5 | 14.4 | 1054.4 | 11.7 | 1135.8 | 17.9  | 10.6  |
| Spot 21 | 4855280 | 4065947 | 12551.5   | 1.2 | 19.0 | 1.0  | 0.3 | 1.8  | 0.0 | 1.3 | 0.707608194 | 274.8  | 3.5  | 271.9  | 4.3  | 247.2  | 29.6  | -11.2 |
| Spot 22 | 1474023 | 1234388 | 13569.9   | 1.0 | 20.3 | 2.6  | 0.2 | 4.1  | 0.0 | 3.2 | 0.782293344 | 189.9  | 6.0  | 183.5  | 6.9  | 101.1  | 60.4  | -87.9 |
| Spot 23 | 2048274 | 1715282 | 39337.7   | 5.6 | 11.1 | 0.8  | 3.0 | 1.5  | 0.2 | 1.2 | 0.82521729  | 1396.0 | 15.6 | 1401.1 | 11.5 | 1408.8 | 16.3  | 0.9   |
| Spot 24 | 273132  | 228728  | 984.4     | 1.1 | 10.0 | 11.5 | 0.3 | 13.2 | 0.0 | 4.8 | 0.364539919 | 155.0  | 7.4  | 255.5  | 29.9 | 1321.3 | 239.6 | 88.3  |
| Spot 25 | 5233945 | 4383052 | 25044.7   | 9.3 | 18.0 | 1.5  | 0.5 | 3.2  | 0.1 | 2.8 | 0.886325922 | 443.8  | 12.2 | 437.5  | 11.4 | 404.4  | 33.2  | -9.8  |
| Spot 27 | 5108225 | 4277771 | 2229.3    | 4.6 | 21.0 | 2.9  | 0.1 | 3.7  | 0.0 | 2.0 | 0.551274127 | 67.8   | 1.4  | 58.8   | 2.1  | NA     | NA    |       |
| Spot 28 | 4451651 | 3727937 | 19153.5   | 2.1 | 19.8 | 1.3  | 0.3 | 2.0  | 0.0 | 1.4 | 0.728126719 | 255.1  | 3.6  | 247.3  | 4.3  | 174.0  | 31.2  | -46.6 |
| Spot 29 | 4543480 | 3804838 | 158626.9  | 3.2 | 10.7 | 1.1  | 3.4 | 1.9  | 0.3 | 1.5 | 0.809798398 | 1534.1 | 20.5 | 1512.0 | 14.6 | 1481.0 | 20.7  | -3.6  |
| Spot 30 | 4190297 | 3509072 | 6345.6    | 1.1 | 19.2 | 1.1  | 0.3 | 2.2  | 0.0 | 1.4 | 0.662664154 | 283.9  | 4.0  | 272.9  | 5.2  | 179.2  | 38.2  | -58.4 |
| Spot 31 | 4104993 | 3437636 | 42231.9   | 1.5 | 11.9 | 0.7  | 2.4 | 1.5  | 0.2 | 1.4 | 0.896012242 | 1228.0 | 15.3 | 1247.1 | 11.0 | 1280.2 | 13.2  | 4.1   |
| Spot 32 | 1261091 | 1056073 | 43872.7   | 1.0 | 6.9  | 1.0  | 7.9 | 2.0  | 0.4 | 1.8 | 0.878714214 | 2154.2 | 32.2 | 2214.3 | 18.0 | 2270.5 | 16.5  | 5.1   |
| Spot 33 | 1981797 | 1659612 | 62400.0   | 2.4 | 11.2 | 0.9  | 3.1 | 1.6  | 0.3 | 1.3 | 0.831799109 | 1445.7 | 17.4 | 1425.1 | 12.4 | 1394.4 | 17.2  | -3.7  |
| Spot 35 | 4827185 | 4042420 | 209327.8  | 2.1 | 12.3 | 0.8  | 2.3 | 1.6  | 0.2 | 1.4 | 0.855530714 | 1207.4 | 15.4 | 1213.2 | 11.6 | 1223.4 | 16.7  | 1.3   |
| Spot 36 | 725832  | 607832  | 22121.5   | 2.8 | 13.2 | 3.8  | 1.9 | 6.5  | 0.2 | 5.3 | 0.812157077 | 1106.5 | 53.4 | 1093.0 | 43.3 | 1066.1 | 75.9  | -3.8  |
| Spot 37 | 742359  | 621673  | 1682.2    | 2.3 | 19.4 | 4.4  | 0.2 | 6.7  | 0.0 | 3.3 | 0.499600118 | 171.0  | 5.6  | 149.0  | 9.3  | NA     | NA    |       |
| Spot 38 | 2309134 | 1933734 | 18586.2   | 3.9 | 12.5 | 1.0  | 2.2 | 2.0  | 0.2 | 1.7 | 0.861286795 | 1187.7 | 18.4 | 1179.8 | 13.7 | 1165.4 | 19.8  | -1.9  |
| Spot 39 | 496976  | 416181  | 1989.7    | 1.6 | 13.7 | 6.3  | 0.5 | 8.4  | 0.1 | 2.9 | 0.341349651 | 319.2  | 8.9  | 382.8  | 26.6 | 788.1  | 165.0 | 59.5  |
| Spot 40 | 1434715 | 1201470 | 7027.1    | 2.7 | 21.6 | 3.7  | 0.1 | 6.1  | 0.0 | 4.8 | 0.784704587 | 93.7   | 4.4  | 86.4   | 5.0  | NA     | NA    |       |
| Spot 41 | 3254986 | 2725816 | 182844.6  | 1.2 | 9.2  | 0.8  | 4.7 | 1.5  | 0.3 | 1.4 | 0.873808771 | 1774.2 | 20.9 | 1775.2 | 13.0 | 1776.4 | 13.7  | 0.1   |
| Spot 42 | 5298976 | 4437511 | 39974.6   | 7.6 | 11.8 | 0.9  | 2.0 | 1.5  | 0.2 | 1.2 | 0.81029068  | 1039.7 | 11.7 | 1122.1 | 10.2 | 1285.2 | 17.1  | 19.1  |
| Spot 44 | 7571968 | 6340978 | 62574.3   | 1.2 | 13.6 | 0.7  | 1.7 | 1.6  | 0.2 | 1.5 | 0.900122824 | 984.5  | 13.4 | 991.0  | 10.3 | 1005.4 | 14.4  | 2.1   |
| Spot 45 | 6165862 | 5163466 | 1547453.3 | 9.7 | 16.6 | 2.6  | 0.5 | 6.3  | 0.1 | 5.8 | 0.912696279 | 354.0  | 19.9 | 389.0  | 20.4 | 602.2  | 55.9  | 41.2  |
| Spot 48 | 992228  | 830920  | 90610.2   | 3.3 | 11.8 | 0.9  | 2.5 | 1.8  | 0.2 | 1.6 | 0.878214162 | 1277.1 | 18.7 | 1284.8 | 13.4 | 1297.6 | 17.1  | 1.6   |
| Spot 50 | 1158100 | 969825  | 34862.2   | 1.8 | 9.1  | 1.2  | 4.6 | 1.9  | 0.3 | 1.6 | 0.796648315 | 1732.2 | 23.5 | 1752.8 | 16.2 | 1777.5 | 21.5  | 2.5   |
| Spot 51 | 871618  | 729917  | 136719.4  | 3.9 | 14.1 | 1.4  | 1.5 | 2.8  | 0.1 | 2.5 | 0.87573057  | 900.3  | 20.9 | 912.6  | 17.1 | 942.5  | 28.1  | 4.5   |
| Spot 52 | 1278786 | 1070892 | 33727.8   | 1.7 | 14.1 | 1.1  | 1.5 | 1.7  | 0.2 | 1.3 | 0.761387702 | 914.3  | 11.3 | 917.8  | 10.5 | 926.3  | 23.2  | 1.3   |
| Spot 53 | 1110366 | 929852  | 2361.0    | 2.1 | 17.8 | 1.8  | 0.3 | 4.6  | 0.0 | 2.0 | 0.439659716 | 279.9  | 5.5  | 270.1  | 10.9 | 185.6  | 96.2  | -50.8 |
| Spot 54 | 284571  | 238308  | 77877.6   | 1.2 | 12.5 | 2.2  | 2.0 | 3.5  | 0.2 | 2.7 | 0.766215579 | 1079.3 | 26.5 | 1115.2 | 23.6 | 1185.8 | 44.3  | 9.0   |
| Spot 55 | 2399002 | 2008992 | 96478.8   | 5.1 | 12.9 | 0.8  | 2.0 | 1.5  | 0.2 | 1.3 | 0.851491663 | 1105.5 | 13.3 | 1109.2 | 10.4 | 1116.5 | 16.1  | 1.0   |
| Spot 56 | 1247364 | 1044577 | 30564.6   | 2.5 | 12.7 | 1.3  | 2.2 | 2.1  | 0.2 | 1.6 | 0.770227678 | 1182.2 | 17.2 | 1166.4 | 14.3 | 1137.3 | 26.2  | -3.9  |
| Spot 57 | 2940580 | 2462524 | 167405.7  | 3.1 | 11.6 | 0.9  | 2.8 | 1.8  | 0.2 | 1.6 | 0.877083721 | 1370.6 | 19.6 | 1354.8 | 13.5 | 1329.9 | 16.8  | -3.1  |
| Spot 58 | 4959269 | 4153031 | 9243.1    | 1.4 | 18.5 | 1.9  | 0.3 | 2.3  | 0.0 | 1.2 | 0.521585558 | 275.4  | 3.2  | 277.8  | 5.6  | 297.7  | 45.0  | 7.5   |



|          |         |         |           |       |      |     |     |     |     |     |             |        |      |        |      |        |       |        |
|----------|---------|---------|-----------|-------|------|-----|-----|-----|-----|-----|-------------|--------|------|--------|------|--------|-------|--------|
| Spot 60  | 3731307 | 3124701 | 13806.9   | 10.9  | 19.6 | 2.5 | 0.3 | 3.5 | 0.0 | 2.4 | 0.683277775 | 245.2  | 5.8  | 239.3  | 7.5  | 181.7  | 60.0  | -34.9  |
| Spot 61  | 1754971 | 1469662 | 12589.6   | 2.4   | 19.6 | 1.5 | 0.3 | 2.3 | 0.0 | 1.5 | 0.672104258 | 243.2  | 3.7  | 237.0  | 4.8  | 176.0  | 39.5  | -38.2  |
| Spot 62  | 2853585 | 2389672 | 7277.9    | 2.3   | 19.8 | 1.3 | 0.3 | 1.9 | 0.0 | 1.3 | 0.701470537 | 279.2  | 3.6  | 261.9  | 4.3  | 110.0  | 31.5  | -153.9 |
| Spot 63  | 3738066 | 3130361 | 346833.6  | 27.3  | 19.2 | 1.5 | 0.3 | 2.3 | 0.0 | 1.7 | 0.748565748 | 259.2  | 4.4  | 260.6  | 5.3  | 273.6  | 35.0  | 5.3    |
| Spot 65  | 1035652 | 867284  | 7508.8    | 1.2   | 15.0 | 4.7 | 0.3 | 6.1 | 0.0 | 3.8 | 0.634279593 | 193.4  | 7.3  | 243.4  | 13.1 | 757.7  | 99.0  | 74.5   |
| Spot 66  | 3577342 | 2995767 | 29387.5   | 9.1   | 19.7 | 1.6 | 0.3 | 2.2 | 0.0 | 1.5 | 0.680278162 | 250.6  | 3.7  | 245.8  | 4.8  | 200.5  | 37.7  | -25.0  |
| Spot 67  | 2077517 | 1739771 | 536255.0  | 3.7   | 11.4 | 0.9 | 2.9 | 1.4 | 0.2 | 1.1 | 0.764095384 | 1381.0 | 13.7 | 1376.4 | 10.9 | 1369.3 | 17.9  | -0.9   |
| Spot 68  | 4449123 | 3725820 | 12942.3   | 2.9   | 19.8 | 1.2 | 0.2 | 1.9 | 0.0 | 1.5 | 0.782637722 | 201.2  | 3.0  | 197.5  | 3.5  | 154.6  | 28.2  | -30.1  |
| Spot 69  | 2236887 | 1873232 | 127321.1  | 1.0   | 17.4 | 1.2 | 0.7 | 2.2 | 0.1 | 1.8 | 0.826734354 | 550.5  | 9.5  | 539.4  | 9.1  | 492.7  | 27.1  | -11.7  |
| Spot 71  | 6301327 | 5276908 | 18930.7   | 1.3   | 11.1 | 0.8 | 1.2 | 1.5 | 0.1 | 1.3 | 0.837206969 | 599.3  | 7.2  | 799.9  | 8.3  | 1408.8 | 15.7  | 57.5   |
| Spot 72  | 3108852 | 2603440 | 36197.9   | 19.2  | 11.8 | 0.8 | 2.7 | 1.4 | 0.2 | 1.2 | 0.822107028 | 1337.3 | 14.3 | 1320.6 | 10.7 | 1293.6 | 16.0  | -3.4   |
| Spot 73  | 3829487 | 3206920 | 10755.1   | 17.8  | 15.7 | 1.5 | 0.8 | 2.6 | 0.1 | 2.1 | 0.820175437 | 585.5  | 12.0 | 606.1  | 11.9 | 684.1  | 31.8  | 14.4   |
| Spot 75  | 8174487 | 6845545 | 42396.5   | 303.7 | 19.2 | 0.7 | 0.3 | 1.3 | 0.0 | 1.1 | 0.82091581  | 252.4  | 2.6  | 253.6  | 2.9  | 264.7  | 17.0  | 4.7    |
| Spot 77  | 2508902 | 2101025 | 33980.7   | 1.8   | 19.0 | 1.3 | 0.3 | 2.0 | 0.0 | 1.5 | 0.740697065 | 289.2  | 4.2  | 288.9  | 5.0  | 286.1  | 30.6  | -1.1   |
| Spot 78  | 4897740 | 4101505 | 76449.7   | 2.1   | 18.9 | 1.2 | 0.3 | 1.7 | 0.0 | 1.3 | 0.744351983 | 238.7  | 3.0  | 245.6  | 3.8  | 312.1  | 26.2  | 23.5   |
| Spot 79  | 2882370 | 2413778 | 20027.9   | 3.5   | 16.8 | 1.6 | 0.7 | 1.9 | 0.1 | 1.1 | 0.569766664 | 520.6  | 5.5  | 527.3  | 7.9  | 556.4  | 34.5  | 6.4    |
| Spot 80  | 3170587 | 2655139 | 21557.4   | 1.7   | 19.4 | 1.3 | 0.3 | 2.2 | 0.0 | 1.8 | 0.80319128  | 280.2  | 4.8  | 274.7  | 5.3  | 227.9  | 30.2  | -22.9  |
| Spot 82  | 456981  | 382689  | 2954.0    | 4.3   | 15.5 | 2.4 | 0.8 | 2.9 | 0.1 | 1.5 | 0.537171077 | 614.7  | 9.0  | 607.3  | 13.1 | 579.8  | 52.5  | -6.0   |
| Spot 83  | 1807754 | 1513864 | 32208.3   | 1.5   | 11.9 | 1.5 | 2.1 | 4.5 | 0.2 | 4.3 | 0.945501326 | 1098.0 | 43.3 | 1161.5 | 31.4 | 1282.1 | 28.7  | 14.4   |
| Spot 85  | 3759090 | 3147967 | 22946.9   | 1.6   | 19.6 | 1.0 | 0.3 | 1.6 | 0.0 | 1.2 | 0.769213179 | 313.5  | 3.8  | 301.8  | 4.2  | 212.5  | 23.9  | -47.5  |
| Spot 86  | 7882531 | 6601052 | 26673.3   | 0.9   | 19.3 | 1.0 | 0.3 | 1.4 | 0.0 | 1.0 | 0.713557575 | 271.4  | 2.7  | 268.5  | 3.4  | 243.3  | 23.0  | -11.5  |
| Spot 87  | 2868407 | 2402084 | 3864.3    | 3.7   | 19.2 | 1.4 | 0.3 | 2.0 | 0.0 | 1.4 | 0.685177434 | 239.9  | 3.2  | 228.0  | 4.1  | 106.7  | 34.3  | -124.8 |
| Spot 88  | 1741711 | 1458558 | 24274.1   | 6.3   | 11.7 | 1.1 | 2.5 | 2.0 | 0.2 | 1.7 | 0.835388409 | 1270.6 | 19.5 | 1285.9 | 14.8 | 1311.5 | 21.6  | 3.1    |
| Spot 90  | 1586781 | 1328815 | 12537.8   | 2.3   | 19.6 | 2.5 | 0.3 | 3.3 | 0.0 | 1.9 | 0.58980242  | 294.4  | 5.6  | 282.0  | 8.1  | 180.1  | 62.2  | -63.5  |
| Spot 91  | 1343634 | 1125197 | 44398.1   | 2.4   | 13.9 | 1.4 | 1.6 | 1.9 | 0.2 | 1.3 | 0.678647277 | 954.7  | 11.6 | 960.1  | 12.0 | 972.5  | 28.8  | 1.8    |
| Spot 92  | 1028114 | 860972  | 5381.2    | 1.9   | 19.2 | 2.2 | 0.3 | 3.3 | 0.0 | 2.4 | 0.735963654 | 288.7  | 6.9  | 274.9  | 8.0  | 159.2  | 52.4  | -81.3  |
| Spot 93  | 1737696 | 1455195 | 3622.2    | 1.6   | 18.9 | 2.4 | 0.3 | 5.1 | 0.0 | 1.5 | 0.305520558 | 291.3  | 4.4  | 274.5  | 12.1 | 132.9  | 113.1 | -119.2 |
| Spot 94  | 2141194 | 1793096 | 13556.4   | 3.2   | 13.0 | 4.1 | 0.8 | 6.4 | 0.1 | 5.0 | 0.771780453 | 449.8  | 21.5 | 570.7  | 28.0 | 1087.1 | 81.9  | 58.6   |
| Spot 96  | 4531341 | 3794672 | 30568.8   | 6.7   | 11.4 | 0.8 | 2.7 | 1.4 | 0.2 | 1.1 | 0.803446103 | 1301.1 | 13.3 | 1324.0 | 10.4 | 1361.1 | 16.2  | 4.4    |
| Spot 97  | 3710719 | 3107460 | 187333.9  | 5.1   | 12.5 | 0.7 | 2.2 | 1.7 | 0.2 | 1.6 | 0.910027575 | 1159.0 | 16.6 | 1169.6 | 12.0 | 1189.5 | 14.1  | 2.6    |
| Spot 98  | 7125976 | 5967492 | 2728298.7 | 1.0   | 17.7 | 2.2 | 0.3 | 2.6 | 0.0 | 1.3 | 0.514223107 | 281.6  | 3.7  | 302.5  | 6.9  | 467.0  | 49.8  | 39.7   |
| Spot 99  | 1757092 | 1471438 | 5978.1    | 1.3   | 19.4 | 1.8 | 0.3 | 3.4 | 0.0 | 1.4 | 0.420006706 | 280.1  | 3.9  | 267.3  | 8.0  | 156.4  | 72.3  | -79.1  |
| Spot 100 | 784567  | 657019  | 14805.8   | 2.6   | 17.0 | 1.3 | 0.7 | 1.7 | 0.1 | 0.9 | 0.551847325 | 560.5  | 4.9  | 552.2  | 7.1  | 518.1  | 30.5  | -8.2   |
| Spot 101 | 4171676 | 3493478 | 588815.4  | 7.0   | 13.0 | 1.3 | 2.0 | 2.0 | 0.2 | 1.6 | 0.777764671 | 1100.1 | 15.8 | 1104.7 | 13.5 | 1113.7 | 25.2  | 1.2    |
| Spot 102 | 1496345 | 1253081 | 14309.2   | 3.5   | 12.5 | 1.5 | 2.1 | 2.1 | 0.2 | 1.5 | 0.692440096 | 1121.2 | 15.3 | 1136.6 | 14.7 | 1166.0 | 30.6  | 3.8    |
| Spot 103 | 759229  | 635799  | 7946.0    | 2.7   | 14.4 | 1.7 | 1.4 | 3.0 | 0.1 | 2.3 | 0.75707754  | 887.3  | 19.1 | 878.3  | 17.9 | 855.6  | 41.3  | -3.7   |
| Spot 104 | 4128676 | 3457469 | 146836.3  | 2.2   | 8.3  | 0.8 | 5.6 | 1.6 | 0.3 | 1.4 | 0.876421921 | 1880.1 | 22.6 | 1913.9 | 13.6 | 1950.6 | 13.6  | 3.6    |
| Spot 106 | 432385  | 362091  | 3994.8    | 1.3   | 16.0 | 2.6 | 0.7 | 3.2 | 0.1 | 1.9 | 0.594423813 | 534.6  | 9.9  | 540.2  | 13.5 | 564.0  | 56.6  | 5.2    |
| Spot 107 | 5902575 | 4942981 | 25843.3   | 1.7   | 19.3 | 1.0 | 0.3 | 1.3 | 0.0 | 0.9 | 0.697297869 | 238.1  | 2.2  | 239.0  | 2.9  | 248.0  | 22.2  | 4.0    |
| Spot 108 | 2041052 | 1709234 | 2282.6    | 1.2   | 20.8 | 2.5 | 0.1 | 4.1 | 0.0 | 3.1 | 0.768964578 | 166.4  | 5.2  | 141.8  | 5.4  | NA     | NA    |        |
| Spot 109 | 7320432 | 6130335 | 97761.8   | 0.9   | 13.5 | 0.9 | 1.8 | 1.6 | 0.2 | 1.3 | 0.821683544 | 1032.0 | 12.3 | 1033.4 | 10.1 | 1036.3 | 18.0  | 0.4    |
| Spot 110 | 6673925 | 5588932 | 59597.1   | 17.5  | 19.6 | 1.1 | 0.3 | 1.9 | 0.0 | 1.5 | 0.812084278 | 243.0  | 3.7  | 241.4  | 4.1  | 225.9  | 25.5  | -7.6   |
| Spot 111 | 707799  | 592731  | 850.1     | 1.1   | 18.1 | 3.6 | 0.1 | 5.8 | 0.0 | 2.8 | 0.475736019 | 177.6  | 4.8  | 137.5  | 7.4  | NA     | NA    |        |

|          |         |         |          |      |      |     |     |      |     |     |             |        |      |        |      |        |       |        |
|----------|---------|---------|----------|------|------|-----|-----|------|-----|-----|-------------|--------|------|--------|------|--------|-------|--------|
| Spot 112 | 2030967 | 1700789 | 10213.5  | 3.5  | 19.4 | 1.8 | 0.3 | 2.2  | 0.0 | 1.2 | 0.56527113  | 258.0  | 3.1  | 252.5  | 4.8  | 202.1  | 41.2  | -27.6  |
| Spot 114 | 5786500 | 4845777 | 160837.2 | 31.4 | 13.4 | 0.9 | 1.7 | 1.5  | 0.2 | 1.2 | 0.813710041 | 986.4  | 11.2 | 1010.5 | 9.6  | 1063.0 | 17.6  | 7.2    |
| Spot 115 | 833776  | 698227  | 3952.6   | 2.4  | 19.7 | 3.1 | 0.2 | 4.6  | 0.0 | 3.2 | 0.691940018 | 207.1  | 6.5  | 195.0  | 8.2  | 51.0   | NA    | -306.2 |
| Spot 117 | 490496  | 410755  | 7276.5   | 2.1  | 12.8 | 1.8 | 2.1 | 2.7  | 0.2 | 1.8 | 0.665742739 | 1152.8 | 19.2 | 1135.3 | 18.7 | 1102.0 | 40.9  | -4.6   |
| Spot 118 | 1168251 | 978326  | 14436.6  | 2.4  | 14.0 | 1.1 | 1.6 | 1.9  | 0.2 | 1.5 | 0.803866917 | 960.2  | 13.6 | 953.0  | 11.7 | 936.4  | 23.2  | -2.5   |
| Spot 119 | 561457  | 470180  | 2846.3   | 1.1  | 12.7 | 7.7 | 0.3 | 7.9  | 0.0 | 1.9 | 0.236481982 | 186.4  | 3.4  | 264.7  | 18.5 | 1031.4 | 156.0 | 81.9   |
| Spot 120 | 2275740 | 1905769 | 36122.0  | 1.1  | 18.8 | 1.7 | 0.3 | 2.2  | 0.0 | 1.4 | 0.612986705 | 299.5  | 4.0  | 301.5  | 5.8  | 316.9  | 39.6  | 5.5    |
| Spot 121 | 1065719 | 892463  | 11239.9  | 2.7  | 12.7 | 1.2 | 2.1 | 1.6  | 0.2 | 1.1 | 0.686671441 | 1181.4 | 12.0 | 1164.6 | 11.2 | 1133.6 | 23.4  | -4.2   |
| Spot 122 | 2090654 | 1750772 | 27141.1  | 2.4  | 8.8  | 0.9 | 4.9 | 1.7  | 0.3 | 1.5 | 0.846255282 | 1762.0 | 22.8 | 1808.8 | 14.7 | 1863.1 | 16.8  | 5.4    |
| Spot 123 | 377548  | 316170  | 14717.4  | 6.9  | 13.8 | 2.9 | 1.4 | 4.2  | 0.1 | 3.1 | 0.73031482  | 873.2  | 25.1 | 904.0  | 25.2 | 980.1  | 58.6  | 10.9   |
| Spot 124 | 2671784 | 2237427 | 32405.2  | 1.7  | 19.1 | 1.5 | 0.3 | 2.0  | 0.0 | 1.4 | 0.691045976 | 301.3  | 4.1  | 298.8  | 5.2  | 278.6  | 33.4  | -8.1   |
| Spot 125 | 1267172 | 1061166 | 4123.2   | 1.2  | 18.5 | 1.5 | 0.6 | 2.0  | 0.1 | 1.4 | 0.669581301 | 514.0  | 6.7  | 464.2  | 7.5  | 224.6  | 34.6  | -128.8 |
| Spot 126 | 633971  | 530905  | 5569.0   | 3.6  | 13.5 | 1.8 | 1.6 | 2.6  | 0.2 | 1.5 | 0.584931112 | 970.3  | 13.5 | 970.5  | 16.1 | 970.9  | 42.5  | 0.1    |
| Spot 127 | 5574924 | 4668598 | 45600.5  | 1.6  | 13.7 | 0.9 | 1.7 | 1.5  | 0.2 | 1.1 | 0.765260059 | 1007.3 | 10.4 | 1008.2 | 9.3  | 1009.9 | 19.1  | 0.3    |
| Spot 128 | 408445  | 342043  | 4383.8   | 1.1  | 17.2 | 4.1 | 0.3 | 4.9  | 0.0 | 2.5 | 0.499789294 | 264.7  | 6.4  | 279.4  | 12.0 | 404.6  | 95.5  | 34.6   |
| Spot 129 | 7251410 | 6072534 | 7889.6   | 2.2  | 19.5 | 0.8 | 0.3 | 1.4  | 0.0 | 1.1 | 0.808775346 | 277.8  | 3.0  | 267.1  | 3.2  | 173.8  | 18.8  | -59.9  |
| Spot 131 | 867047  | 726090  | 1249.0   | 5.3  | 20.3 | 5.0 | 0.1 | 8.6  | 0.0 | 6.0 | 0.694645573 | 108.4  | 6.4  | 85.2   | 7.1  | NA     | NA    |        |
| Spot 132 | 2607984 | 2183999 | 2510.5   | 0.9  | 20.2 | 1.4 | 0.2 | 2.2  | 0.0 | 1.7 | 0.756239047 | 198.4  | 3.2  | 175.2  | 3.5  | NA     | NA    |        |
| Spot 133 | 1512007 | 1266197 | 29263.4  | 3.3  | 12.6 | 0.7 | 2.2 | 1.7  | 0.2 | 1.5 | 0.903156857 | 1210.6 | 16.7 | 1194.2 | 11.8 | 1164.6 | 14.3  | -4.0   |
| Spot 134 | 1481515 | 1240662 | 11417.1  | 1.8  | 17.8 | 1.8 | 0.6 | 2.2  | 0.1 | 1.3 | 0.567927055 | 484.3  | 5.8  | 470.7  | 8.3  | 405.2  | 40.6  | -19.5  |
| Spot 135 | 4597132 | 3849767 | 8443.1   | 7.9  | 19.0 | 2.1 | 0.3 | 3.4  | 0.0 | 2.3 | 0.666729631 | 248.3  | 5.5  | 246.9  | 7.4  | 233.8  | 58.1  | -6.2   |
| Spot 136 | 1739843 | 1456993 | 6495.4   | 1.3  | 18.7 | 2.0 | 0.3 | 2.4  | 0.0 | 1.2 | 0.503073042 | 290.0  | 3.4  | 286.4  | 6.0  | 256.8  | 47.8  | -12.9  |
| Spot 137 | 2359425 | 1975849 | 3104.5   | 11.9 | 19.5 | 2.0 | 0.3 | 3.1  | 0.0 | 2.2 | 0.715366523 | 255.7  | 5.6  | 234.3  | 6.6  | 24.7   | NA    | -933.4 |
| Spot 138 | 855296  | 716249  | 3960.1   | 1.3  | 16.6 | 1.5 | 0.8 | 2.4  | 0.1 | 1.7 | 0.6947281   | 666.2  | 10.4 | 624.2  | 11.1 | 474.8  | 37.8  | -40.3  |
| Spot 139 | 3222056 | 2698240 | 65566.5  | 2.2  | 11.4 | 0.6 | 2.9 | 1.9  | 0.2 | 1.8 | 0.940084677 | 1380.6 | 22.0 | 1378.1 | 14.2 | 1374.3 | 12.3  | -0.5   |
| Spot 140 | 445846  | 373364  | 1405.7   | 3.3  | 19.0 | 4.0 | 0.3 | 6.2  | 0.0 | 3.5 | 0.563570616 | 282.1  | 9.6  | 234.8  | 12.9 | NA     | NA    |        |
| Spot 141 | 1447163 | 1211895 | 7298.0   | 1.8  | 18.7 | 2.3 | 0.3 | 3.2  | 0.0 | 1.4 | 0.436522838 | 298.6  | 4.0  | 295.2  | 8.1  | 267.8  | 65.3  | -11.5  |
| Spot 142 | 1721544 | 1441669 | 15236.8  | 1.4  | 16.5 | 1.1 | 0.8 | 1.7  | 0.1 | 1.2 | 0.737029274 | 596.1  | 7.0  | 595.3  | 7.5  | 592.5  | 24.3  | -0.6   |
| Spot 143 | 1193981 | 999873  | 19073.2  | 3.3  | 7.8  | 0.6 | 6.6 | 1.4  | 0.4 | 1.2 | 0.891008041 | 2031.2 | 21.4 | 2052.9 | 12.1 | 2074.7 | 11.0  | 2.1    |
| Spot 144 | 1666408 | 1395496 | 2638.2   | 2.5  | 15.8 | 3.9 | 0.3 | 4.3  | 0.0 | 1.7 | 0.388378383 | 274.6  | 4.5  | 303.3  | 11.3 | 530.4  | 86.9  | 48.2   |
| Spot 146 | 5679392 | 4756082 | 345773.8 | 3.8  | 14.4 | 0.9 | 1.2 | 1.6  | 0.1 | 1.4 | 0.847479837 | 791.7  | 10.4 | 822.5  | 9.3  | 906.8  | 18.0  | 12.7   |
| Spot 147 | 1721168 | 1441355 | 15465.5  | 11.3 | 17.6 | 2.4 | 0.3 | 2.9  | 0.0 | 1.6 | 0.542666182 | 254.1  | 3.9  | 274.5  | 6.9  | 452.7  | 53.4  | 43.9   |
| Spot 148 | 760994  | 637278  | 1979.0   | 1.4  | 24.3 | 2.4 | 0.1 | 3.2  | 0.0 | 1.4 | 0.441329381 | 184.3  | 2.5  | 127.9  | 3.8  | NA     | NA    |        |
| Spot 150 | 1868599 | 1564817 | 10667.8  | 1.8  | 18.0 | 2.7 | 0.4 | 3.1  | 0.0 | 1.4 | 0.454884276 | 298.2  | 4.1  | 307.9  | 8.1  | 381.9  | 61.4  | 21.9   |
| Spot 151 | 249513  | 208949  | 863.6    | 1.8  | 13.6 | 9.1 | 0.2 | 13.1 | 0.0 | 4.4 | 0.340416386 | 190.6  | 8.4  | 214.9  | 25.3 | 491.4  | 271.8 | 61.2   |
| Spot 152 | 9209402 | 7712212 | 14890.3  | 1.4  | 19.4 | 1.0 | 0.3 | 1.5  | 0.0 | 1.1 | 0.752923834 | 243.3  | 2.7  | 241.1  | 3.2  | 219.8  | 22.8  | -10.7  |
| Spot 153 | 1175477 | 984378  | 112703.4 | 1.8  | 6.3  | 0.7 | 9.3 | 1.3  | 0.4 | 1.1 | 0.84118163  | 2283.3 | 20.9 | 2370.7 | 11.8 | 2446.7 | 11.8  | 6.7    |
| Spot 155 | 8082972 | 6768907 | 31123.4  | 12.0 | 17.9 | 1.1 | 0.5 | 2.0  | 0.1 | 1.6 | 0.824412359 | 373.3  | 6.0  | 382.4  | 6.4  | 438.1  | 25.2  | 14.8   |
| Spot 156 | 1612037 | 1349965 | 37037.0  | 1.5  | 10.0 | 1.2 | 3.1 | 2.6  | 0.2 | 2.3 | 0.883922535 | 1324.4 | 27.3 | 1442.1 | 19.9 | 1620.3 | 22.5  | 18.3   |
| Spot 157 | 664793  | 556716  | 1408.3   | 0.7  | 20.3 | 3.3 | 0.2 | 5.5  | 0.0 | 2.8 | 0.510899062 | 189.0  | 5.2  | 149.4  | 7.6  | NA     | NA    |        |
| Spot 158 | 5899979 | 4940808 | 126694.0 | 9.3  | 15.2 | 0.9 | 1.0 | 2.1  | 0.1 | 1.8 | 0.890415797 | 696.9  | 12.2 | 721.1  | 10.7 | 797.2  | 19.7  | 12.6   |
| Spot 159 | 857466  | 718066  | 10764.9  | 2.7  | 15.5 | 1.3 | 1.0 | 2.0  | 0.1 | 1.3 | 0.66596712  | 709.2  | 9.0  | 710.1  | 10.3 | 712.8  | 31.9  | 0.5    |
| Spot 160 | 1758180 | 1472349 | 27230.5  | 4.1  | 12.3 | 1.0 | 2.3 | 1.5  | 0.2 | 1.1 | 0.724458405 | 1208.8 | 11.9 | 1213.7 | 10.5 | 1222.5 | 20.2  | 1.1    |

|          |          |          |          |       |      |     |      |     |     |     |             |        |      |        |      |        |       |        |
|----------|----------|----------|----------|-------|------|-----|------|-----|-----|-----|-------------|--------|------|--------|------|--------|-------|--------|
| Spot 161 | 5400748  | 4522738  | 68154.3  | 2.4   | 13.5 | 1.0 | 1.7  | 1.6 | 0.2 | 1.2 | 0.757934486 | 980.7  | 10.8 | 1001.0 | 10.0 | 1045.9 | 20.6  | 6.2    |
| Spot 162 | 2053782  | 1719895  | 13195.4  | 1.7   | 19.5 | 1.4 | 0.3  | 2.2 | 0.0 | 1.5 | 0.689936549 | 301.8  | 4.4  | 291.4  | 5.5  | 208.4  | 36.3  | -44.8  |
| Spot 163 | 1685669  | 1411627  | 70564.0  | 1.3   | 19.2 | 2.4 | 0.3  | 3.0 | 0.0 | 1.9 | 0.627110967 | 298.0  | 5.5  | 295.7  | 7.8  | 278.1  | 54.0  | -7.2   |
| Spot 165 | 3452141  | 2890920  | 3388.2   | 3.2   | 9.7  | 3.2 | 3.7  | 4.2 | 0.3 | 1.7 | 0.417913745 | 1553.3 | 24.1 | 1578.5 | 33.5 | 1612.2 | 70.8  | 3.7    |
| Spot 166 | 897017   | 751187   | 6593.1   | 1.4   | 15.8 | 1.6 | 0.9  | 2.3 | 0.1 | 1.6 | 0.694967558 | 688.1  | 10.5 | 677.2  | 11.4 | 641.0  | 35.7  | -7.4   |
| Spot 168 | 872361   | 730539   | 9175.9   | 1.9   | 14.1 | 1.8 | 1.4  | 2.4 | 0.1 | 1.5 | 0.620943448 | 876.9  | 12.2 | 884.8  | 14.2 | 904.5  | 38.8  | 3.0    |
| Spot 170 | 5545731  | 4644150  | 114488.3 | 1.9   | 19.5 | 1.1 | 0.3  | 1.9 | 0.0 | 1.5 | 0.797069413 | 268.1  | 4.0  | 266.2  | 4.5  | 250.3  | 26.5  | -7.1   |
| Spot 172 | 1350845  | 1131235  | 4936.9   | 1.5   | 18.8 | 2.6 | 0.3  | 4.4 | 0.0 | 3.5 | 0.790320574 | 290.3  | 9.9  | 280.5  | 10.8 | 199.7  | 62.8  | -45.4  |
| Spot 173 | 3807772  | 3188735  | 471678.9 | 7.2   | 8.4  | 1.5 | 5.6  | 2.5 | 0.3 | 2.0 | 0.814488783 | 1901.3 | 33.8 | 1921.7 | 21.7 | 1943.7 | 26.1  | 2.2    |
| Spot 174 | 20746589 | 17373775 | 11566.7  | 17.9  | 13.9 | 0.8 | 0.8  | 1.8 | 0.1 | 1.6 | 0.89136315  | 481.8  | 7.6  | 572.2  | 8.0  | 949.6  | 17.0  | 49.3   |
| Spot 176 | 5233043  | 4382297  | 831375.8 | 1.8   | 12.1 | 0.9 | 2.5  | 1.4 | 0.2 | 1.0 | 0.77053532  | 1295.5 | 12.2 | 1282.0 | 9.9  | 1259.4 | 16.9  | -2.9   |
| Spot 177 | 1427178  | 1195159  | 8396.1   | 4.4   | 13.8 | 1.4 | 1.6  | 2.1 | 0.2 | 1.5 | 0.724895701 | 984.9  | 13.9 | 973.3  | 13.1 | 947.4  | 29.6  | -4.0   |
| Spot 178 | 2084415  | 1745547  | 18559.4  | 18.6  | 16.2 | 2.0 | 0.5  | 2.6 | 0.1 | 1.7 | 0.644990648 | 358.8  | 6.0  | 398.8  | 8.7  | 637.3  | 43.5  | 43.7   |
| Spot 179 | 5531983  | 4632637  | 14179.2  | 3.1   | 19.9 | 1.3 | 0.2  | 2.6 | 0.0 | 2.1 | 0.835266748 | 197.9  | 4.2  | 194.6  | 4.5  | 155.3  | 32.9  | -27.5  |
| Spot 180 | 1670827  | 1399198  | 58862.5  | 282.0 | 15.2 | 1.8 | 1.0  | 2.2 | 0.1 | 1.3 | 0.588812261 | 699.4  | 8.5  | 719.7  | 11.3 | 783.8  | 37.1  | 10.8   |
| Spot 181 | 1229764  | 1029839  | 11560.1  | 1.8   | 12.6 | 1.4 | 1.8  | 2.4 | 0.2 | 1.9 | 0.787540506 | 988.9  | 17.3 | 1038.1 | 15.6 | 1143.1 | 29.4  | 13.5   |
| Spot 184 | 721601   | 604289   | 3993.4   | 1.1   | 16.3 | 3.3 | 0.7  | 4.2 | 0.1 | 2.5 | 0.598176502 | 510.4  | 12.2 | 510.7  | 16.7 | 511.8  | 73.1  | 0.3    |
| Spot 185 | 3230140  | 2705010  | 3993.9   | 1.8   | 18.8 | 1.0 | 0.3  | 1.8 | 0.0 | 1.5 | 0.83393081  | 281.9  | 4.2  | 270.4  | 4.4  | 171.5  | 23.7  | -64.4  |
| Spot 186 | 2617024  | 2191569  | 55297.6  | 3.1   | 12.3 | 1.0 | 2.3  | 1.7 | 0.2 | 1.4 | 0.808053583 | 1213.3 | 14.9 | 1214.2 | 11.8 | 1215.8 | 19.4  | 0.2    |
| Spot 187 | 2325848  | 1947730  | 126233.9 | 1.8   | 8.7  | 0.8 | 5.2  | 1.7 | 0.3 | 1.5 | 0.878171567 | 1839.7 | 23.4 | 1857.8 | 14.2 | 1878.0 | 14.4  | 2.0    |
| Spot 188 | 1078315  | 903011   | 10933.6  | 3.3   | 9.8  | 1.1 | 3.5  | 3.4 | 0.3 | 3.2 | 0.947646801 | 1453.5 | 41.7 | 1524.6 | 26.7 | 1624.8 | 20.1  | 10.5   |
| Spot 189 | 577491   | 483607   | 3474.9   | 2.2   | 12.8 | 1.5 | 1.7  | 3.2 | 0.2 | 1.6 | 0.49674996  | 977.4  | 14.6 | 993.0  | 20.6 | 1027.6 | 57.0  | 4.9    |
| Spot 191 | 5672136  | 4750006  | 11422.9  | 5.2   | 19.4 | 1.4 | 0.3  | 1.8 | 0.0 | 1.2 | 0.633626523 | 235.1  | 2.7  | 231.8  | 3.8  | 198.0  | 32.7  | -18.7  |
| Spot 193 | 182596   | 152911   | 2125.1   | 1.4   | 11.4 | 4.0 | 2.1  | 5.7 | 0.2 | 2.0 | 0.348608897 | 1113.6 | 20.2 | 1147.1 | 39.0 | 1210.9 | 104.8 | 8.0    |
| Spot 194 | 3502809  | 2933350  | 13822.8  | 1.7   | 19.2 | 0.9 | 0.3  | 1.7 | 0.0 | 1.4 | 0.834132287 | 287.6  | 3.9  | 282.2  | 4.1  | 238.2  | 21.3  | -20.7  |
| Spot 195 | 6888964  | 5769012  | 31269.5  | 3.1   | 18.5 | 1.2 | 0.3  | 1.7 | 0.0 | 1.2 | 0.718715968 | 249.0  | 3.0  | 258.2  | 3.9  | 342.7  | 27.3  | 27.4   |
| Spot 196 | 4875109  | 4082553  | 13518.2  | 1.3   | 19.5 | 0.9 | 0.3  | 2.0 | 0.0 | 1.8 | 0.879724546 | 268.8  | 4.7  | 261.7  | 4.7  | 199.0  | 22.3  | -35.1  |
| Spot 197 | 2157362  | 1806635  | 14452.1  | 1.5   | 17.1 | 0.9 | 0.7  | 1.7 | 0.1 | 1.4 | 0.812243815 | 543.0  | 7.2  | 536.4  | 7.1  | 508.4  | 21.9  | -6.8   |
| Spot 198 | 8543713  | 7154745  | 33175.2  | 1.0   | 18.7 | 1.8 | 0.3  | 2.4 | 0.0 | 1.5 | 0.644282353 | 262.1  | 3.9  | 268.5  | 5.6  | 324.6  | 41.2  | 19.3   |
| Spot 199 | 3491535  | 2923909  | 3393.2   | 1.7   | 18.9 | 1.4 | 0.3  | 2.2 | 0.0 | 1.7 | 0.757229889 | 287.1  | 4.7  | 269.8  | 5.2  | 122.6  | 34.1  | -134.2 |
| Spot 200 | 3432548  | 2874512  | 5476.0   | 3.6   | 17.9 | 3.0 | 0.1  | 3.9 | 0.0 | 2.2 | 0.562062345 | 72.8   | 1.6  | 81.0   | 3.0  | 329.9  | 73.4  | 77.9   |
| Spot 202 | 10098234 | 8456545  | 4710.7   | 3.5   | 19.9 | 1.9 | 0.1  | 3.1 | 0.0 | 1.3 | 0.438893774 | 67.9   | 0.9  | 67.1   | 2.0  | 40.5   | NA    | -67.6  |
| Spot 203 | 904198   | 757201   | 1386.2   | 1.3   | 16.1 | 4.6 | 0.3  | 5.3 | 0.0 | 2.0 | 0.38091094  | 281.0  | 5.6  | 278.9  | 13.0 | 261.3  | 113.2 | -7.5   |
| Spot 204 | 2675856  | 2240837  | 32858.0  | 1.5   | 5.5  | 0.6 | 11.0 | 1.6 | 0.4 | 1.5 | 0.920469301 | 2373.1 | 29.0 | 2527.2 | 14.8 | 2653.4 | 10.3  | 10.6   |
| Spot 205 | 8412558  | 7044912  | 32485.8  | 1.0   | 19.2 | 0.9 | 0.3  | 1.8 | 0.0 | 1.5 | 0.85143489  | 288.1  | 4.3  | 285.8  | 4.4  | 267.6  | 21.5  | -7.6   |
| Spot 206 | 1603824  | 1343087  | 584699.7 | 2.1   | 12.6 | 1.2 | 2.2  | 1.9 | 0.2 | 1.5 | 0.795088866 | 1200.0 | 16.8 | 1191.7 | 13.5 | 1176.6 | 23.2  | -2.0   |
| Spot 207 | 3048991  | 2553311  | 11520.9  | 3.7   | 19.3 | 1.4 | 0.3  | 2.3 | 0.0 | 1.5 | 0.66547394  | 270.4  | 4.1  | 264.4  | 5.4  | 212.3  | 40.0  | -27.3  |
| Spot 208 | 10816903 | 9058378  | 244317.9 | 18.9  | 12.3 | 1.0 | 2.4  | 2.0 | 0.2 | 1.7 | 0.858682064 | 1276.0 | 20.2 | 1255.5 | 14.6 | 1220.4 | 20.4  | -4.6   |
| Spot 209 | 2435697  | 2039721  | 39384.1  | 1.3   | 19.3 | 2.1 | 0.3  | 2.6 | 0.0 | 1.5 | 0.574496926 | 284.1  | 4.1  | 281.2  | 6.3  | 256.8  | 48.5  | -10.7  |
| Spot 210 | 14370985 | 12034666 | 91664.4  | 32.7  | 14.0 | 1.0 | 1.6  | 1.9 | 0.2 | 1.6 | 0.852791965 | 995.8  | 14.9 | 982.3  | 11.9 | 952.4  | 20.2  | -4.6   |
| Spot 212 | 7019494  | 5878321  | 9110.0   | 0.9   | 19.3 | 0.9 | 0.3  | 1.4 | 0.0 | 1.1 | 0.787922411 | 271.9  | 2.9  | 263.7  | 3.2  | 191.6  | 19.9  | -41.9  |
| Spot 213 | 1558909  | 1305474  | 17855.8  | 2.1   | 17.0 | 1.2 | 0.7  | 1.8 | 0.1 | 1.4 | 0.753975569 | 556.7  | 7.4  | 550.4  | 7.8  | 524.4  | 26.4  | -6.2   |
| Spot 214 | 3122734  | 2615065  | 558253.8 | 338.0 | 17.0 | 0.9 | 0.7  | 1.9 | 0.1 | 1.6 | 0.868272027 | 526.6  | 8.2  | 531.9  | 7.8  | 554.4  | 20.3  | 5.0    |

|          |          |         |            |      |      |     |     |     |     |     |             |        |      |        |      |        |       |        |
|----------|----------|---------|------------|------|------|-----|-----|-----|-----|-----|-------------|--------|------|--------|------|--------|-------|--------|
| Spot 215 | 5624554  | 4710159 | 20089.9    | 45.0 | 17.1 | 0.9 | 0.7 | 1.6 | 0.1 | 1.3 | 0.817084013 | 554.0  | 7.1  | 547.0  | 6.9  | 518.2  | 20.7  | -6.9   |
| Spot 216 | 6700063  | 5610821 | 201364.0   | 37.9 | 12.4 | 0.7 | 2.3 | 1.3 | 0.2 | 1.1 | 0.843531217 | 1198.7 | 11.6 | 1201.2 | 8.8  | 1205.8 | 13.3  | 0.6    |
| Spot 218 | 1469873  | 1230913 | 1763.5     | 1.4  | 18.2 | 4.2 | 0.2 | 6.3 | 0.0 | 1.7 | 0.273229516 | 174.6  | 3.0  | 164.7  | 9.5  | 24.1   | NA    | -625.0 |
| Spot 219 | 4119902  | 3450121 | 41746.0    | 1.6  | 19.1 | 1.1 | 0.3 | 1.8 | 0.0 | 1.5 | 0.795709564 | 270.8  | 3.9  | 271.1  | 4.4  | 273.6  | 25.4  | 1.0    |
| Spot 220 | 1094860  | 916867  | 15775.5    | 3.5  | 12.4 | 1.2 | 2.2 | 1.8 | 0.2 | 1.3 | 0.738940328 | 1162.9 | 14.1 | 1173.4 | 12.5 | 1192.8 | 23.8  | 2.5    |
| Spot 222 | 6193006  | 5186197 | 36988.9    | 47.3 | 12.6 | 0.8 | 2.1 | 1.4 | 0.2 | 1.2 | 0.825769697 | 1131.7 | 12.3 | 1145.1 | 9.8  | 1170.5 | 16.0  | 3.3    |
| Spot 224 | 1308164  | 1095493 | 6213.6     | 3.3  | 16.6 | 2.6 | 0.6 | 3.5 | 0.1 | 1.5 | 0.4128075   | 435.8  | 6.1  | 449.9  | 12.8 | 522.2  | 70.5  | 16.5   |
| Spot 226 | 3258554  | 2728804 | 6877.8     | 2.2  | 19.5 | 1.1 | 0.3 | 1.9 | 0.0 | 1.5 | 0.796529367 | 277.7  | 4.2  | 264.3  | 4.5  | 147.0  | 27.4  | -88.9  |
| Spot 227 | 6808794  | 5701875 | 49311.2    | 3.3  | 15.2 | 1.2 | 1.0 | 1.6 | 0.1 | 1.1 | 0.686362717 | 690.2  | 7.4  | 712.1  | 8.4  | 781.8  | 25.0  | 11.7   |
| Spot 228 | 2338158  | 1958039 | 3497.4     | 1.2  | 20.1 | 3.5 | 0.1 | 4.5 | 0.0 | 2.6 | 0.57574083  | 77.3   | 2.0  | 73.8   | 3.2  | NA     | NA    |        |
| Spot 230 | 1463508  | 1225583 | 4517.2     | 1.2  | 21.5 | 2.1 | 0.2 | 4.8 | 0.0 | 2.1 | 0.428847905 | 192.2  | 3.9  | 168.8  | 7.4  | NA     | NA    |        |
| Spot 231 | 1798294  | 1505942 | 14278.3    | 3.7  | 19.0 | 1.9 | 0.4 | 3.2 | 0.1 | 2.5 | 0.779382869 | 326.1  | 7.9  | 319.0  | 8.7  | 268.0  | 45.9  | -21.7  |
| Spot 232 | 2993911  | 2507185 | 76412.2    | 2.0  | 11.2 | 1.1 | 2.9 | 1.9 | 0.2 | 1.5 | 0.816337488 | 1364.4 | 18.9 | 1380.7 | 14.2 | 1406.0 | 20.8  | 3.0    |
| Spot 233 | 1426992  | 1195003 | 4376.3     | 1.5  | 18.7 | 2.2 | 0.3 | 3.2 | 0.0 | 1.8 | 0.560379659 | 281.3  | 4.9  | 273.7  | 7.6  | 209.6  | 60.7  | -34.2  |
| Spot 234 | 1028619  | 861394  | 41557.0    | 2.5  | 14.2 | 1.1 | 1.4 | 2.2 | 0.1 | 1.9 | 0.861990219 | 855.4  | 15.5 | 879.2  | 13.2 | 939.5  | 23.3  | 9.0    |
| Spot 236 | 5388885  | 4512803 | 31369.8    | 4.0  | 11.7 | 0.8 | 2.5 | 2.0 | 0.2 | 1.8 | 0.907873513 | 1241.0 | 20.6 | 1270.5 | 14.5 | 1320.8 | 16.3  | 6.0    |
| Spot 237 | 4972102  | 4163778 | 17613.1    | 2.6  | 19.4 | 0.8 | 0.3 | 1.5 | 0.0 | 1.3 | 0.838394897 | 240.0  | 3.0  | 238.9  | 3.3  | 228.3  | 19.3  | -5.1   |
| Spot 239 | 2689397  | 2252177 | 20768.3    | 2.5  | 18.8 | 1.9 | 0.3 | 2.5 | 0.0 | 1.7 | 0.656890816 | 289.6  | 4.7  | 291.9  | 6.4  | 310.2  | 43.4  | 6.6    |
| Spot 240 | 2439080  | 2042554 | 33172.8    | 2.5  | 13.5 | 0.8 | 1.7 | 1.7 | 0.2 | 1.5 | 0.878968136 | 1014.4 | 14.3 | 1019.9 | 11.2 | 1031.9 | 16.7  | 1.7    |
| Spot 241 | 1305151  | 1092970 | 37229.1    | 1.5  | 12.7 | 0.8 | 2.1 | 2.6 | 0.2 | 2.4 | 0.948279135 | 1135.3 | 25.3 | 1144.5 | 17.6 | 1161.9 | 16.1  | 2.3    |
| Spot 242 | 2166643  | 1814407 | 13257.8    | 2.3  | 12.5 | 1.1 | 2.1 | 2.4 | 0.2 | 2.1 | 0.877106228 | 1122.1 | 21.5 | 1142.9 | 16.4 | 1182.5 | 22.7  | 5.1    |
| Spot 243 | 1610221  | 1348444 | 25131.0    | 1.3  | 18.7 | 1.8 | 0.3 | 2.1 | 0.0 | 1.1 | 0.517086558 | 279.0  | 3.0  | 284.8  | 5.3  | 332.8  | 41.0  | 16.2   |
| Spot 244 | 11220530 | 9396386 | 11938.3    | 12.7 | 16.0 | 1.5 | 0.3 | 1.8 | 0.0 | 1.0 | 0.549758885 | 224.8  | 2.2  | 266.8  | 4.2  | 653.4  | 32.5  | 65.6   |
| Spot 245 | 4883372  | 4089473 | 10343.8    | 7.0  | 19.7 | 1.6 | 0.2 | 2.3 | 0.0 | 1.2 | 0.530215021 | 174.8  | 2.1  | 174.8  | 3.6  | 174.7  | 44.7  | 0.0    |
| Spot 246 | 1335370  | 1118277 | 3721.7     | 1.7  | 19.4 | 1.7 | 0.3 | 2.7 | 0.0 | 1.7 | 0.615870402 | 275.3  | 4.5  | 256.4  | 6.1  | 87.1   | 50.3  | -216.0 |
| Spot 247 | 813978   | 681648  | 121782.7   | 3.2  | 13.9 | 1.6 | 1.5 | 2.2 | 0.1 | 1.5 | 0.681092999 | 888.0  | 12.2 | 917.5  | 13.0 | 989.2  | 32.1  | 10.2   |
| Spot 248 | 1877706  | 1572444 | 22172.1    | 0.7  | 10.5 | 0.8 | 3.6 | 1.5 | 0.3 | 1.2 | 0.835216217 | 1557.7 | 17.1 | 1542.5 | 11.8 | 1521.7 | 15.4  | -2.4   |
| Spot 249 | 739423   | 619214  | 20004.9    | 2.2  | 12.6 | 1.6 | 2.0 | 2.5 | 0.2 | 1.9 | 0.766820122 | 1100.3 | 19.7 | 1123.3 | 17.2 | 1167.9 | 32.2  | 5.8    |
| Spot 250 | 445796   | 373322  | 3397.9     | 2.0  | 12.8 | 7.3 | 0.3 | 7.7 | 0.0 | 2.4 | 0.310140479 | 179.9  | 4.2  | 258.0  | 17.6 | 1045.3 | 148.2 | 82.8   |
| Spot 251 | 2341789  | 1961080 | 52545.2    | 3.5  | 11.0 | 0.8 | 2.9 | 1.4 | 0.2 | 1.2 | 0.842675066 | 1347.2 | 14.7 | 1389.6 | 10.9 | 1455.3 | 14.7  | 7.4    |
| Spot 252 | 4293760  | 3595715 | 105242.7   | 2.3  | 17.6 | 1.3 | 0.6 | 1.9 | 0.1 | 1.4 | 0.727884052 | 477.2  | 6.3  | 480.1  | 7.2  | 493.8  | 28.3  | 3.4    |
| Spot 253 | 2151298  | 1801557 | 36724.4    | 4.8  | 12.3 | 0.8 | 2.4 | 1.3 | 0.2 | 1.0 | 0.77763019  | 1274.5 | 11.5 | 1256.1 | 9.2  | 1224.8 | 15.8  | -4.1   |
| Spot 254 | 4714438  | 3948002 | 78583564.0 | 6.6  | 12.7 | 0.9 | 1.8 | 1.7 | 0.2 | 1.4 | 0.824666311 | 997.7  | 12.8 | 1054.5 | 11.0 | 1174.2 | 18.7  | 15.0   |
| Spot 255 | 790508   | 661994  | 10230.3    | 1.9  | 16.0 | 1.7 | 0.8 | 2.4 | 0.1 | 1.6 | 0.663774894 | 605.4  | 9.1  | 613.2  | 10.9 | 642.1  | 38.0  | 5.7    |
| Spot 256 | 6140609  | 5142318 | 62824.9    | 14.3 | 13.8 | 0.9 | 1.5 | 1.7 | 0.1 | 1.5 | 0.84951883  | 877.8  | 12.0 | 914.0  | 10.4 | 1002.3 | 18.5  | 12.4   |
| Spot 258 | 4247055  | 3556603 | 7873.5     | 1.6  | 18.6 | 2.7 | 0.2 | 3.1 | 0.0 | 1.5 | 0.488515542 | 164.4  | 2.4  | 172.5  | 4.9  | 286.1  | 61.4  | 42.5   |
| Spot 259 | 2311285  | 1935534 | 5202.2     | 2.6  | 18.0 | 1.6 | 0.3 | 2.5 | 0.0 | 1.9 | 0.732767957 | 298.5  | 5.4  | 301.4  | 6.6  | 323.4  | 39.3  | 7.7    |
| Spot 260 | 1162198  | 973257  | 25740.7    | 1.8  | 11.2 | 0.9 | 2.8 | 1.8 | 0.2 | 1.6 | 0.875633613 | 1311.4 | 18.5 | 1347.0 | 13.3 | 1404.0 | 16.5  | 6.6    |
| Spot 261 | 577889   | 483940  | 5305.1     | 3.9  | 12.9 | 1.2 | 1.9 | 1.9 | 0.2 | 1.4 | 0.744488026 | 1110.4 | 14.3 | 1096.0 | 12.7 | 1067.6 | 25.4  | -4.0   |
| Spot 262 | 579202   | 485040  | 3009.3     | 1.6  | 18.1 | 3.9 | 0.2 | 5.5 | 0.0 | 3.6 | 0.654998429 | 185.9  | 6.5  | 188.3  | 9.4  | 217.9  | 95.4  | 14.7   |
| Spot 263 | 1583638  | 1326183 | 13363.7    | 1.9  | 16.4 | 2.7 | 0.4 | 3.3 | 0.0 | 1.8 | 0.557509641 | 296.3  | 5.3  | 334.3  | 9.3  | 607.8  | 58.6  | 51.2   |
| Spot 264 | 1999862  | 1674741 | 32801.8    | 3.0  | 12.2 | 1.0 | 2.2 | 1.7 | 0.2 | 1.3 | 0.796533006 | 1167.6 | 14.3 | 1189.8 | 11.8 | 1230.6 | 19.9  | 5.1    |
| Spot 265 | 4003216  | 3352406 | 9666.6     | 10.5 | 19.1 | 1.6 | 0.3 | 2.3 | 0.0 | 1.5 | 0.628599063 | 261.8  | 3.8  | 258.5  | 5.3  | 229.2  | 41.9  | -14.2  |

|          |          |          |          |      |      |     |     |      |     |     |             |        |      |        |      |        |      |        |
|----------|----------|----------|----------|------|------|-----|-----|------|-----|-----|-------------|--------|------|--------|------|--------|------|--------|
| Spot 266 | 3947671  | 3305891  | 19518.5  | 2.4  | 18.4 | 1.3 | 0.4 | 1.8  | 0.1 | 1.3 | 0.713166397 | 324.1  | 4.1  | 328.2  | 5.0  | 357.4  | 28.5 | 9.3    |
| Spot 267 | 2032836  | 1702354  | 11902.7  | 0.9  | 18.8 | 2.9 | 0.2 | 3.6  | 0.0 | 2.2 | 0.608272649 | 217.3  | 4.7  | 223.1  | 7.3  | 284.3  | 66.0 | 23.6   |
| Spot 268 | 1988872  | 1665537  | 28636.5  | 2.0  | 19.5 | 1.5 | 0.3 | 2.1  | 0.0 | 1.6 | 0.732010513 | 274.4  | 4.2  | 269.9  | 5.1  | 231.6  | 33.7 | -18.5  |
| Spot 271 | 4103638  | 3436502  | 226605.9 | 8.9  | 12.6 | 0.9 | 2.1 | 1.7  | 0.2 | 1.4 | 0.853663938 | 1137.6 | 15.1 | 1150.8 | 11.7 | 1175.8 | 17.5 | 3.3    |
| Spot 272 | 1109485  | 929114   | 441311.4 | 3.2  | 9.9  | 1.2 | 3.8 | 2.0  | 0.3 | 1.6 | 0.80188987  | 1551.7 | 22.1 | 1587.9 | 16.0 | 1636.3 | 22.2 | 5.2    |
| Spot 273 | 1614965  | 1352417  | 9499.2   | 1.8  | 18.7 | 1.7 | 0.3 | 2.2  | 0.0 | 1.4 | 0.628943234 | 287.3  | 3.9  | 285.8  | 5.6  | 273.3  | 39.7 | -5.1   |
| Spot 274 | 7142389  | 5981237  | 80678.0  | 1.6  | 12.9 | 0.8 | 1.9 | 1.8  | 0.2 | 1.6 | 0.892291526 | 1063.5 | 15.6 | 1084.4 | 11.9 | 1126.6 | 16.1 | 5.6    |
| Spot 275 | 2651996  | 2220856  | 27512.0  | 2.5  | 13.3 | 1.1 | 1.8 | 1.8  | 0.2 | 1.3 | 0.76453495  | 1041.4 | 12.9 | 1045.6 | 11.5 | 1054.4 | 22.8 | 1.2    |
| Spot 276 | 2421898  | 2028165  | 18726.7  | 4.4  | 14.1 | 0.9 | 1.6 | 1.8  | 0.2 | 1.6 | 0.86820294  | 965.4  | 14.3 | 953.7  | 11.4 | 926.8  | 18.8 | -4.2   |
| Spot 277 | 3100442  | 2596397  | 16203.4  | 1.2  | 18.1 | 1.5 | 0.5 | 2.9  | 0.1 | 2.4 | 0.839199902 | 412.5  | 9.6  | 406.7  | 9.6  | 373.8  | 35.0 | -10.4  |
| Spot 278 | 4308844  | 3608347  | 16802.7  | 1.3  | 18.8 | 1.9 | 0.3 | 2.5  | 0.0 | 1.6 | 0.639791283 | 302.0  | 4.7  | 300.8  | 6.4  | 291.6  | 43.4 | -3.6   |
| Spot 279 | 2582821  | 2162927  | 47170.6  | 8.9  | 12.2 | 1.0 | 2.4 | 1.6  | 0.2 | 1.3 | 0.784765467 | 1251.4 | 14.4 | 1244.6 | 11.6 | 1232.8 | 19.6 | -1.5   |
| Spot 280 | 1174861  | 983862   | 37218.5  | 5.1  | 13.7 | 1.6 | 1.7 | 1.9  | 0.2 | 1.1 | 0.554635194 | 1004.3 | 10.0 | 1001.6 | 12.4 | 995.5  | 32.8 | -0.9   |
| Spot 281 | 616846   | 516564   | 3324.3   | 0.7  | 12.8 | 4.5 | 0.6 | 5.3  | 0.1 | 2.5 | 0.471460333 | 385.1  | 9.3  | 491.7  | 20.5 | 1025.1 | 93.9 | 62.4   |
| Spot 283 | 2101637  | 1759970  | 30082.3  | 8.3  | 12.6 | 0.8 | 2.2 | 1.8  | 0.2 | 1.6 | 0.888962734 | 1182.0 | 16.9 | 1172.6 | 12.2 | 1155.2 | 16.0 | -2.3   |
| Spot 285 | 452659   | 379069   | 11580.7  | 4.1  | 14.0 | 1.9 | 1.4 | 2.7  | 0.1 | 1.9 | 0.70067337  | 870.8  | 15.6 | 886.1  | 16.2 | 924.5  | 40.2 | 5.8    |
| Spot 286 | 2070410  | 1733819  | 54846.1  | 3.1  | 13.1 | 0.8 | 1.9 | 1.4  | 0.2 | 1.2 | 0.840875274 | 1102.1 | 12.2 | 1098.2 | 9.6  | 1090.5 | 15.5 | -1.1   |
| Spot 287 | 203569   | 170474   | 6223.6   | 1.6  | 11.9 | 1.8 | 2.1 | 2.6  | 0.2 | 1.8 | 0.693494325 | 1086.2 | 17.9 | 1138.3 | 17.6 | 1239.1 | 36.4 | 12.3   |
| Spot 288 | 11529318 | 9654974  | 839582.7 | 8.5  | 13.9 | 0.8 | 1.5 | 1.6  | 0.2 | 1.4 | 0.875735753 | 903.2  | 11.8 | 923.8  | 9.7  | 973.3  | 15.8 | 7.2    |
| Spot 289 | 1799310  | 1506793  | 34262.4  | 1.7  | 17.1 | 2.5 | 0.5 | 3.7  | 0.1 | 2.7 | 0.729714913 | 373.7  | 9.9  | 394.7  | 12.2 | 519.5  | 55.9 | 28.1   |
| Spot 290 | 436301   | 365371   | 1063.4   | 1.0  | 16.1 | 7.3 | 0.2 | 11.7 | 0.0 | 5.3 | 0.458006604 | 201.0  | 10.6 | 193.0  | 20.5 | 96.2   | NA   | -108.9 |
| Spot 291 | 458482   | 383946   | 3477.0   | 3.6  | 12.5 | 1.4 | 2.0 | 2.1  | 0.2 | 1.4 | 0.658978657 | 1122.5 | 14.2 | 1108.4 | 14.1 | 1080.8 | 31.5 | -3.9   |
| Spot 292 | 1621620  | 1357990  | 2023.9   | 1.8  | 20.1 | 1.7 | 0.2 | 2.5  | 0.0 | 1.8 | 0.714659154 | 246.7  | 4.3  | 208.2  | 4.7  | NA     | NA   |        |
| Spot 294 | 557824   | 467138   | 33375.1  | 2.2  | 14.1 | 1.1 | 1.4 | 1.8  | 0.1 | 1.5 | 0.803235963 | 861.9  | 11.8 | 880.0  | 10.7 | 925.7  | 22.2 | 6.9    |
| Spot 295 | 1078988  | 903575   | 16650.8  | 2.2  | 13.6 | 1.3 | 1.7 | 1.8  | 0.2 | 1.2 | 0.66170154  | 1008.3 | 11.1 | 1000.1 | 11.4 | 982.1  | 27.4 | -2.7   |
| Spot 296 | 3844097  | 3219154  | 201651.2 | 2.1  | 12.7 | 1.1 | 2.0 | 2.5  | 0.2 | 2.2 | 0.89634278  | 1103.9 | 22.3 | 1119.3 | 16.6 | 1149.4 | 21.6 | 4.0    |
| Spot 297 | 2866603  | 2400574  | 62145.4  | 1.5  | 11.9 | 0.7 | 2.7 | 1.4  | 0.2 | 1.2 | 0.852013044 | 1339.5 | 14.8 | 1316.9 | 10.6 | 1280.3 | 14.6 | -4.6   |
| Spot 298 | 176786   | 148046   | 3013.6   | 0.6  | 9.3  | 2.0 | 3.5 | 3.3  | 0.2 | 2.6 | 0.795878039 | 1426.0 | 33.3 | 1524.3 | 25.8 | 1663.6 | 36.7 | 14.3   |
| Spot 299 | 1388896  | 1163101  | 11646.4  | 2.2  | 18.2 | 1.8 | 0.5 | 2.6  | 0.1 | 1.7 | 0.662717622 | 430.1  | 7.1  | 416.6  | 8.8  | 342.2  | 43.7 | -25.7  |
| Spot 300 | 3278585  | 2745579  | 13466.1  | 1.0  | 18.9 | 1.7 | 0.3 | 2.5  | 0.0 | 1.8 | 0.711419802 | 280.9  | 4.8  | 277.8  | 6.0  | 251.7  | 40.1 | -11.6  |
| Spot 301 | 1911908  | 1601085  | 4449.3   | 0.8  | 18.3 | 1.5 | 0.3 | 2.1  | 0.0 | 1.4 | 0.674342592 | 237.4  | 3.2  | 236.7  | 4.3  | 229.6  | 35.0 | -3.4   |
| Spot 302 | 512970   | 429576   | 3679.2   | 1.1  | 15.2 | 4.1 | 0.8 | 5.5  | 0.1 | 3.6 | 0.652648914 | 591.2  | 20.2 | 602.9  | 25.0 | 647.3  | 89.3 | 8.7    |
| Spot 303 | 629066   | 526798   | 49202.0  | 1.7  | 13.9 | 1.7 | 1.5 | 2.5  | 0.1 | 1.8 | 0.718629882 | 898.8  | 14.9 | 915.3  | 14.9 | 955.4  | 35.1 | 5.9    |
| Spot 304 | 12152626 | 10176950 | 264856.0 | 9.0  | 12.4 | 0.8 | 2.3 | 1.3  | 0.2 | 1.1 | 0.819782475 | 1212.1 | 12.1 | 1206.4 | 9.4  | 1196.2 | 15.1 | -1.3   |
| Spot 305 | 3543887  | 2967750  | 10419.0  | 3.7  | 18.3 | 1.3 | 0.4 | 1.7  | 0.0 | 1.1 | 0.635604992 | 309.5  | 3.3  | 310.1  | 4.6  | 314.7  | 30.5 | 1.7    |
| Spot 306 | 2799597  | 2344461  | 44755.6  | 3.1  | 13.5 | 0.7 | 1.6 | 2.2  | 0.2 | 2.1 | 0.946156236 | 956.0  | 18.8 | 973.6  | 14.0 | 1013.6 | 14.7 | 5.7    |
| Spot 308 | 2296274  | 1922964  | 543299.8 | 2.2  | 10.6 | 0.7 | 3.3 | 1.5  | 0.3 | 1.2 | 0.858302661 | 1470.5 | 16.4 | 1478.2 | 11.3 | 1489.2 | 14.1 | 1.3    |
| Spot 310 | 778182   | 651671   | 6617.5   | 2.8  | 13.8 | 1.5 | 1.5 | 2.5  | 0.2 | 1.6 | 0.653278221 | 921.6  | 13.9 | 921.1  | 15.0 | 920.1  | 38.5 | -0.2   |
| Spot 312 | 1461845  | 1224190  | 5955.2   | 2.6  | 14.4 | 1.0 | 1.3 | 1.8  | 0.1 | 1.5 | 0.84711151  | 828.4  | 12.0 | 824.7  | 10.3 | 814.9  | 20.2 | -1.7   |
| Spot 313 | 2171738  | 1818674  | 9387.4   | 3.0  | 18.4 | 1.1 | 0.6 | 1.9  | 0.1 | 1.3 | 0.682980323 | 505.6  | 6.2  | 470.4  | 7.0  | 302.3  | 30.9 | -67.3  |
| Spot 314 | 2526574  | 2115824  | 37747.0  | 3.3  | 13.0 | 0.9 | 1.9 | 1.9  | 0.2 | 1.7 | 0.891338231 | 1084.3 | 16.8 | 1089.0 | 12.6 | 1098.4 | 17.1 | 1.3    |
| Spot 315 | 11378427 | 9528614  | 59842.7  | 11.5 | 13.8 | 0.8 | 1.7 | 1.5  | 0.2 | 1.2 | 0.83384798  | 1002.3 | 11.3 | 990.8  | 9.2  | 965.4  | 16.4 | -3.8   |

Run 3 NM8A (discordant)

|          |          |         |          |      |      |      |      |      |     |      |             |        |       |        |      |        |       |        |
|----------|----------|---------|----------|------|------|------|------|------|-----|------|-------------|--------|-------|--------|------|--------|-------|--------|
| Spot 105 | 5793     | 4851    | 1000.0   | 2.0  | 5.2  | 1.0  | 27.0 | 1.2  | 1.0 | 0.6  | 0.514177533 | 4540.9 | 19.6  | 3383.6 | 11.4 | 2755.1 | 16.4  | -64.8  |
| Spot 113 | 2386145  | 1998225 | 34181.0  | 8.2  | 12.1 | 1.0  | 2.6  | 1.6  | 0.2 | 1.3  | 0.794084573 | 1342.8 | 15.8  | 1313.6 | 12.1 | 1266.3 | 19.5  | -6.0   |
| Spot 116 | 1608673  | 1347148 | 90411.7  | 1.2  | 12.4 | 1.0  | 2.5  | 1.6  | 0.2 | 1.3  | 0.789521254 | 1282.9 | 14.8  | 1258.6 | 11.6 | 1217.1 | 19.4  | -5.4   |
| Spot 13  | 653340   | 547125  | 3483.4   | 3.5  | 15.5 | 1.6  | 1.3  | 2.8  | 0.1 | 2.4  | 0.831081022 | 871.4  | 19.3  | 841.3  | 16.3 | 762.4  | 33.4  | -14.3  |
| Spot 130 | 1541698  | 1291061 | 362660.1 | 2.9  | 12.3 | 0.8  | 2.5  | 1.9  | 0.2 | 1.8  | 0.905126945 | 1304.3 | 20.7  | 1274.5 | 14.1 | 1224.7 | 16.2  | -6.5   |
| Spot 145 | 756017   | 633110  | 13475.2  | 2.7  | 14.5 | 3.7  | 1.6  | 5.2  | 0.2 | 3.6  | 0.701641297 | 1002.9 | 33.9  | 970.0  | 32.5 | 896.1  | 76.4  | -11.9  |
| Spot 149 | 435992   | 365112  | 5363.0   | 1.3  | 32.7 | 3.6  | 0.2  | 30.2 | 0.1 | 30.0 | 0.992705622 | 330.4  | 96.6  | 203.4  | 55.8 | NA     | NA    |        |
| Spot 154 | 452042   | 378553  | 5368.5   | 2.9  | 15.6 | 1.8  | 1.3  | 2.7  | 0.2 | 2.0  | 0.73590203  | 913.3  | 16.9  | 866.8  | 15.7 | 749.7  | 38.6  | -21.8  |
| Spot 164 | 1549783  | 1297831 | 20559.4  | 3.6  | 13.2 | 4.0  | 2.4  | 9.8  | 0.2 | 8.9  | 0.913441651 | 1321.3 | 106.7 | 1237.2 | 70.1 | 1093.7 | 79.7  | -20.8  |
| Spot 167 | 965797   | 808785  | 8139.2   | 3.1  | 13.2 | 1.1  | 2.1  | 1.7  | 0.2 | 1.3  | 0.737856918 | 1168.2 | 13.4  | 1140.5 | 11.6 | 1088.1 | 22.9  | -7.4   |
| Spot 169 | 4725399  | 3957182 | 21392.6  | 7.5  | 16.1 | 1.1  | 1.0  | 1.6  | 0.1 | 1.2  | 0.750669503 | 708.7  | 8.1   | 699.7  | 8.1  | 670.6  | 22.7  | -5.7   |
| Spot 171 | 2096731  | 1755862 | 19560.5  | 2.7  | 9.7  | 0.9  | 2.6  | 2.1  | 0.2 | 1.8  | 0.897726095 | 1094.2 | 18.5  | 1306.9 | 15.1 | 1675.4 | 16.7  | 34.7   |
| Spot 175 | 1556667  | 1303596 | 41660.8  | 7.8  | 14.7 | 1.0  | 1.5  | 1.7  | 0.2 | 1.3  | 0.781804908 | 955.4  | 11.5  | 928.8  | 10.1 | 866.3  | 21.5  | -10.3  |
| Spot 18  | 7089212  | 5936705 | 35632.3  | 3.1  | 11.8 | 1.1  | 2.0  | 2.2  | 0.2 | 1.9  | 0.868522634 | 1038.5 | 18.4  | 1127.3 | 15.1 | 1302.6 | 21.3  | 20.3   |
| Spot 182 | 2301731  | 1927534 | 24142.8  | 8.9  | 12.3 | 1.6  | 2.5  | 2.2  | 0.2 | 1.5  | 0.683856678 | 1306.1 | 18.1  | 1279.6 | 16.3 | 1235.4 | 32.1  | -5.7   |
| Spot 183 | 589617   | 493761  | 5065.5   | 2.3  | 4.1  | 11.1 | 5.5  | 11.5 | 0.2 | 2.9  | 0.249072802 | 980.1  | 26.0  | 1899.4 | 99.1 | 3137.1 | 177.7 | 68.8   |
| Spot 19  | 1249015  | 1045961 | 6046.3   | 1.7  | 20.9 | 2.3  | 0.6  | 16.1 | 0.1 | 15.9 | 0.99015684  | 516.6  | 79.2  | 445.6  | 58.2 | 93.6   | 53.4  | -451.7 |
| Spot 190 | 442105   | 370231  | 565.9    | 1.2  | 15.1 | 7.1  | 0.3  | 7.4  | 0.0 | 2.2  | 0.292497817 | 185.4  | 4.0   | 239.4  | 15.8 | 808.6  | 148.5 | 77.1   |
| Spot 192 | 2693968  | 2256004 | 37466.9  | 17.1 | 8.8  | 9.6  | 2.0  | 10.2 | 0.1 | 3.5  | 0.346916226 | 766.7  | 25.5  | 1105.7 | 68.7 | 1851.2 | 173.1 | 58.6   |
| Spot 201 | 511165   | 428064  | 2659.5   | 1.9  | 15.9 | 4.4  | 1.1  | 5.4  | 0.1 | 3.1  | 0.578223957 | 753.2  | 22.0  | 741.7  | 28.2 | 706.9  | 93.1  | -6.5   |
| Spot 211 | 5454288  | 4567573 | 297508.4 | 5.6  | 14.1 | 2.6  | 1.8  | 3.8  | 0.2 | 2.9  | 0.747172556 | 1087.2 | 28.7  | 1043.3 | 25.0 | 952.7  | 52.2  | -14.1  |
| Spot 217 | 858383   | 718834  | 25652.7  | 2.9  | 12.4 | 0.8  | 2.5  | 1.6  | 0.2 | 1.4  | 0.861653713 | 1286.1 | 16.4  | 1261.1 | 11.8 | 1218.7 | 16.3  | -5.5   |
| Spot 221 | 690419   | 578176  | 2048.8   | 1.3  | 23.2 | 5.9  | 0.2  | 13.8 | 0.0 | 12.5 | 0.905592294 | 190.1  | 23.5  | 166.1  | 21.2 | NA     | NA    |        |
| Spot 223 | 1007636  | 843822  | 5867.2   | 3.0  | 17.3 | 2.0  | 1.0  | 2.8  | 0.1 | 1.9  | 0.677857416 | 786.0  | 13.9  | 721.2  | 14.3 | 524.6  | 44.7  | -49.8  |
| Spot 225 | 2506770  | 2099240 | 8203.5   | 1.9  | 21.8 | 2.7  | 0.2  | 10.9 | 0.0 | 10.6 | 0.968943947 | 216.4  | 22.4  | 198.7  | 19.7 | NA     | NA    |        |
| Spot 229 | 3573578  | 2992614 | 45901.6  | 20.2 | 11.4 | 0.8  | 2.1  | 1.7  | 0.2 | 1.5  | 0.895363607 | 1054.6 | 14.9  | 1164.0 | 11.8 | 1373.8 | 14.6  | 23.2   |
| Spot 235 | 274817   | 230139  | 3951.4   | 1.7  | 14.1 | 4.3  | 1.8  | 8.6  | 0.2 | 7.5  | 0.867406659 | 1098.7 | 75.7  | 1050.9 | 56.6 | 952.9  | 88.0  | -15.3  |
| Spot 238 | 614729   | 514791  | 1795.8   | 3.4  | 16.3 | 1.8  | 1.3  | 2.6  | 0.1 | 1.8  | 0.715336927 | 896.7  | 15.4  | 828.7  | 14.5 | 650.4  | 38.5  | -37.9  |
| Spot 257 | 625794   | 524057  | 2654.8   | 1.4  | 28.2 | 5.8  | 0.8  | 8.0  | 0.2 | 5.5  | 0.688195706 | 1005.2 | 51.3  | 611.3  | 36.8 | NA     | NA    |        |
| Spot 26  | 2484758  | 2080806 | 19378.9  | 8.8  | 14.1 | 1.0  | 1.7  | 1.5  | 0.2 | 1.2  | 0.774858113 | 1032.9 | 11.3  | 1006.1 | 9.8  | 948.0  | 19.8  | -9.0   |
| Spot 269 | 556692   | 466190  | 547.1    | 1.8  | 26.2 | 10.4 | 0.1  | 12.0 | 0.0 | 6.0  | 0.502181155 | 178.0  | 10.6  | 139.3  | 15.7 | NA     | NA    |        |
| Spot 270 | 1019146  | 853461  | 7255.0   | 5.0  | 23.2 | 4.1  | 0.1  | 8.8  | 0.0 | 7.7  | 0.883052116 | 112.1  | 8.6   | 100.7  | 8.4  | NA     | NA    |        |
| Spot 282 | 893250   | 748032  | 12781.1  | 1.6  | 14.2 | 1.1  | 1.7  | 1.9  | 0.2 | 1.5  | 0.815288538 | 1012.6 | 14.1  | 991.5  | 11.7 | 945.1  | 22.0  | -7.1   |
| Spot 284 | 852012   | 713499  | 37195.5  | 1.9  | 16.2 | 2.0  | 1.0  | 2.7  | 0.1 | 1.9  | 0.697242315 | 745.3  | 13.4  | 726.6  | 14.1 | 669.1  | 41.8  | -11.4  |
| Spot 293 | 630880   | 528317  | 1352.9   | 4.7  | 19.5 | 7.4  | 0.1  | 12.1 | 0.0 | 9.5  | 0.789719547 | 100.4  | 9.5   | 106.8  | 12.2 | 253.7  | 170.4 | 60.4   |
| Spot 307 | 529363   | 443303  | 19721.9  | 3.4  | 14.7 | 1.5  | 1.5  | 1.9  | 0.2 | 1.2  | 0.620455157 | 933.7  | 10.1  | 915.8  | 11.3 | 873.0  | 30.5  | -7.0   |
| Spot 309 | 1899863  | 1590998 | 33286.5  | 8.6  | 7.3  | 2.1  | 2.3  | 2.7  | 0.1 | 1.7  | 0.640089738 | 749.6  | 12.3  | 1219.2 | 19.2 | 2184.5 | 36.2  | 65.7   |
| Spot 311 | 2743952  | 2297862 | 90752.6  | 2.8  | 13.2 | 1.6  | 1.3  | 2.4  | 0.1 | 1.8  | 0.746807646 | 746.2  | 12.6  | 836.0  | 13.7 | 1083.0 | 32.0  | 31.1   |
| Spot 34  | 10219419 | 8558028 | 20199.0  | 1.9  | 10.3 | 1.1  | 2.1  | 2.3  | 0.2 | 2.0  | 0.870995098 | 934.2  | 17.6  | 1143.7 | 16.0 | 1566.1 | 21.4  | 40.3   |
| Spot 43  | 322965   | 270460  | 28405.4  | 11.7 | 13.4 | 2.2  | 1.3  | 5.1  | 0.1 | 4.7  | 0.903766411 | 792.3  | 34.7  | 866.6  | 30.0 | 1061.6 | 44.3  | 25.4   |
| Spot 46  | 551262   | 461643  | 1883.6   | 4.2  | 15.2 | 1.6  | 1.4  | 2.1  | 0.2 | 1.4  | 0.650970224 | 944.4  | 12.1  | 903.2  | 12.6 | 803.5  | 33.6  | -17.5  |
| Spot 47  | 1756492  | 1470935 | 5815.5   | 3.7  | 14.8 | 1.1  | 1.5  | 1.7  | 0.2 | 1.3  | 0.766836509 | 982.4  | 12.2  | 942.0  | 10.7 | 848.8  | 23.2  | -15.7  |
| Spot 49  | 137158   | 114860  | 518.1    | 1.4  | 26.6 | 15.3 | 0.2  | 25.2 | 0.0 | 19.9 | 0.792562239 | 206.8  | 40.6  | 158.6  | 37.0 | NA     | NA    |        |

|         |         |         |          |     |      |     |      |      |     |      |             |        |      |        |      |        |       |        |
|---------|---------|---------|----------|-----|------|-----|------|------|-----|------|-------------|--------|------|--------|------|--------|-------|--------|
| Spot 59 | 1598666 | 1338768 | 233978.8 | 2.8 | 21.3 | 4.2 | 0.1  | 11.7 | 0.0 | 11.0 | 0.934715282 | 99.1   | 10.8 | 96.9   | 10.8 | 40.8   | NA    | -143.0 |
| Spot 64 | 1069447 | 895585  | 48051.9  | 1.9 | 15.0 | 1.1 | 1.5  | 2.1  | 0.2 | 1.8  | 0.858200489 | 963.8  | 16.2 | 921.8  | 12.8 | 822.8  | 22.6  | -17.1  |
| Spot 70 | 2125918 | 1780303 | 12827.9  | 2.0 | 15.8 | 0.9 | 1.1  | 1.7  | 0.1 | 1.4  | 0.827042483 | 762.2  | 10.0 | 751.0  | 8.9  | 717.9  | 20.0  | -6.2   |
| Spot 74 | 1484897 | 1243495 | 15149.4  | 3.2 | 13.2 | 1.1 | 2.1  | 1.8  | 0.2 | 1.4  | 0.77824703  | 1204.2 | 15.4 | 1164.6 | 12.5 | 1091.7 | 22.7  | -10.3  |
| Spot 76 | 2499201 | 2092901 | 59402.1  | 3.5 | 10.7 | 0.8 | 3.6  | 1.6  | 0.3 | 1.4  | 0.86711957  | 1586.8 | 19.0 | 1545.2 | 12.4 | 1488.8 | 14.7  | -6.6   |
| Spot 81 | 1054998 | 883485  | 13986.4  | 0.7 | 13.9 | 7.0 | 0.3  | 9.3  | 0.0 | 6.1  | 0.658560116 | 200.0  | 12.0 | 276.5  | 22.4 | 986.6  | 142.0 | 79.7   |
| Spot 84 | 5615514 | 4702589 | 1918.1   | 0.6 | 10.7 | 5.1 | 2.0  | 5.5  | 0.2 | 2.2  | 0.39353189  | 908.6  | 18.5 | 1098.9 | 37.2 | 1498.2 | 96.3  | 39.4   |
| Spot 89 | 14203   | 11894   | 1000.0   | 0.8 | 5.2  | 1.0 | 27.0 | 1.2  | 1.0 | 0.6  | 0.51417895  | 4545.3 | 19.6 | 3384.8 | 11.4 | 2755.1 | 16.4  | -65.0  |
| Spot 95 | 363006  | 303991  | 2698.7   | 3.3 | 14.5 | 3.8 | 1.7  | 4.2  | 0.2 | 1.7  | 0.406410475 | 1043.0 | 16.5 | 997.6  | 26.7 | 899.0  | 79.4  | -16.0  |

**Run 4**

|         |          |          |           |       |      |     |     |     |     |     |             |        |      |        |      |        |      |       |
|---------|----------|----------|-----------|-------|------|-----|-----|-----|-----|-----|-------------|--------|------|--------|------|--------|------|-------|
| Spot 1  | 2960639  | 4730156  | 13287.1   | 1.2   | 17.4 | 1.2 | 0.5 | 2.3 | 0.1 | 1.9 | 0.841986968 | 396.8  | 7.4  | 409.4  | 7.6  | 480.6  | 27.0 | 17.4  |
| Spot 2  | 11291205 | 18039739 | 34857.6   | 2.8   | 20.1 | 2.1 | 0.1 | 2.4 | 0.0 | 1.2 | 0.495950331 | 70.9   | 0.8  | 73.9   | 1.7  | 170.5  | 49.0 | 58.4  |
| Spot 3  | 975135   | 1557955  | 13346.4   | 0.7   | 16.8 | 1.4 | 0.7 | 2.3 | 0.1 | 1.7 | 0.766714071 | 562.9  | 9.3  | 562.9  | 9.7  | 563.1  | 31.5 | 0.0   |
| Spot 4  | 906579   | 1448424  | 20982.9   | 3.3   | 14.6 | 2.4 | 1.4 | 3.7 | 0.1 | 2.8 | 0.757061425 | 882.6  | 22.9 | 877.7  | 21.6 | 865.5  | 49.7 | -2.0  |
| Spot 5  | 2369646  | 3785938  | 32923.6   | 2.6   | 13.3 | 0.9 | 1.7 | 1.8 | 0.2 | 1.6 | 0.869203288 | 998.1  | 14.8 | 1020.6 | 11.8 | 1069.0 | 18.3 | 6.6   |
| Spot 6  | 16716187 | 26707127 | 401094.7  | 10.9  | 12.9 | 0.8 | 1.9 | 1.4 | 0.2 | 1.1 | 0.811078336 | 1060.5 | 11.1 | 1085.1 | 9.3  | 1134.9 | 16.3 | 6.6   |
| Spot 7  | 6599626  | 10544093 | 1058804.7 | 5.9   | 16.5 | 1.0 | 0.8 | 1.6 | 0.1 | 1.3 | 0.775754324 | 587.6  | 7.1  | 598.2  | 7.4  | 638.5  | 22.1 | 8.0   |
| Spot 8  | 4790081  | 7653020  | 152593.9  | 4.8   | 11.5 | 0.8 | 2.7 | 1.5 | 0.2 | 1.2 | 0.844256979 | 1294.8 | 14.6 | 1323.0 | 10.9 | 1369.1 | 15.2 | 5.4   |
| Spot 9  | 6565869  | 10490162 | 130011.4  | 7.7   | 12.7 | 0.7 | 2.0 | 1.3 | 0.2 | 1.1 | 0.856531048 | 1082.3 | 11.4 | 1116.0 | 9.1  | 1182.3 | 13.7 | 8.5   |
| Spot 10 | 1597562  | 2552393  | 7109.1    | 17.8  | 16.2 | 1.5 | 0.9 | 2.0 | 0.1 | 1.3 | 0.666842687 | 634.9  | 7.9  | 628.1  | 9.2  | 603.3  | 31.8 | -5.2  |
| Spot 11 | 1233109  | 1970114  | 13251.8   | 0.6   | 15.6 | 2.5 | 1.1 | 3.7 | 0.1 | 2.7 | 0.722918488 | 741.9  | 18.8 | 737.1  | 19.4 | 722.7  | 54.3 | -2.6  |
| Spot 13 | 451075   | 720674   | 8440.5    | 2.6   | 13.2 | 3.1 | 1.6 | 4.6 | 0.2 | 3.3 | 0.716093643 | 959.6  | 29.2 | 987.3  | 28.9 | 1049.5 | 64.5 | 8.6   |
| Spot 15 | 1392644  | 2225000  | 41222.1   | 8.5   | 12.5 | 0.9 | 2.2 | 1.7 | 0.2 | 1.5 | 0.855763487 | 1151.7 | 15.5 | 1168.9 | 11.9 | 1200.8 | 17.5 | 4.1   |
| Spot 16 | 2194554  | 3506196  | 6223.1    | 3.1   | 19.3 | 1.5 | 0.3 | 3.4 | 0.0 | 2.1 | 0.606152964 | 235.8  | 4.8  | 231.4  | 7.1  | 186.9  | 63.3 | -26.1 |
| Spot 17 | 731557   | 1168795  | 740.6     | 1.2   | 17.9 | 4.6 | 0.1 | 5.0 | 0.0 | 1.9 | 0.384865704 | 173.7  | 3.3  | 128.7  | 6.0  | NA     | NA   |       |
| Spot 18 | 6004265  | 9592898  | 36820.6   | 21.5  | 12.2 | 0.8 | 2.3 | 1.4 | 0.2 | 1.1 | 0.820136873 | 1166.3 | 12.1 | 1196.9 | 9.7  | 1252.5 | 15.5 | 6.9   |
| Spot 19 | 3961053  | 6328497  | 104379.5  | 3.3   | 12.2 | 0.9 | 2.3 | 1.7 | 0.2 | 1.4 | 0.850690812 | 1211.6 | 16.0 | 1225.9 | 12.1 | 1251.1 | 17.5 | 3.2   |
| Spot 20 | 3117913  | 4981429  | 180060.1  | 8.3   | 12.1 | 0.7 | 2.3 | 1.7 | 0.2 | 1.5 | 0.896921997 | 1187.6 | 16.2 | 1214.9 | 11.8 | 1263.8 | 14.4 | 6.0   |
| Spot 21 | 2609975  | 4169906  | 14841.1   | 7.5   | 10.2 | 1.6 | 1.1 | 2.1 | 0.1 | 1.3 | 0.604805841 | 507.2  | 6.1  | 754.9  | 11.0 | 1581.5 | 30.8 | 67.9  |
| Spot 22 | 2918899  | 4663468  | 339169.0  | 3.8   | 12.1 | 0.9 | 2.3 | 1.7 | 0.2 | 1.5 | 0.860563891 | 1171.4 | 16.0 | 1207.0 | 12.3 | 1271.2 | 17.3 | 7.9   |
| Spot 23 | 2847349  | 4549155  | 90857.6   | 6.1   | 13.7 | 1.2 | 1.7 | 2.1 | 0.2 | 1.7 | 0.809060804 | 1005.4 | 15.5 | 1013.4 | 13.2 | 1030.8 | 24.5 | 2.5   |
| Spot 24 | 2062631  | 3295425  | 13623.6   | 256.1 | 16.3 | 1.2 | 0.8 | 2.3 | 0.1 | 1.9 | 0.836885789 | 609.8  | 11.3 | 613.9  | 10.7 | 628.8  | 27.4 | 3.0   |
| Spot 25 | 753719   | 1204202  | 8338.8    | 3.0   | 12.8 | 2.6 | 1.9 | 5.5 | 0.2 | 4.8 | 0.881087842 | 1083.4 | 48.3 | 1097.0 | 36.9 | 1124.1 | 51.8 | 3.6   |
| Spot 26 | 4349726  | 6949473  | 28088.2   | 24.0  | 12.4 | 0.9 | 2.1 | 1.7 | 0.2 | 1.4 | 0.830226383 | 1132.8 | 14.5 | 1164.6 | 11.6 | 1224.1 | 18.4 | 7.5   |
| Spot 27 | 2493154  | 3983263  | 825.5     | 3.8   | 19.7 | 3.8 | 0.0 | 4.9 | 0.0 | 2.6 | 0.539334469 | 68.3   | 1.8  | 47.8   | 2.3  | NA     | NA   |       |
| Spot 28 | 3288667  | 5254239  | 105093.3  | 4.4   | 13.9 | 0.8 | 1.6 | 1.4 | 0.2 | 1.2 | 0.831617118 | 941.8  | 10.5 | 960.3  | 9.0  | 1002.7 | 16.2 | 6.1   |
| Spot 31 | 1054129  | 1684161  | 5723.4    | 1.1   | 16.9 | 1.4 | 0.6 | 2.1 | 0.1 | 1.3 | 0.632972212 | 509.0  | 6.4  | 506.0  | 8.3  | 492.1  | 35.5 | -3.4  |
| Spot 32 | 10270882 | 16409588 | 22138.4   | 17.9  | 17.6 | 0.8 | 0.4 | 1.5 | 0.0 | 1.3 | 0.830280131 | 292.6  | 3.6  | 313.7  | 4.1  | 473.1  | 18.6 | 38.1  |
| Spot 33 | 10450097 | 16695917 | 29771.2   | 9.4   | 17.3 | 0.9 | 0.6 | 1.5 | 0.1 | 1.2 | 0.77713275  | 479.1  | 5.4  | 485.9  | 5.8  | 518.5  | 20.8 | 7.6   |
| Spot 34 | 2660958  | 4251361  | 10717.7   | 10.6  | 19.5 | 1.6 | 0.3 | 2.4 | 0.0 | 1.5 | 0.636776397 | 232.8  | 3.5  | 230.2  | 4.9  | 203.7  | 42.8 | -14.3 |
| Spot 35 | 1508846  | 2410654  | 30720.3   | 1.7   | 19.2 | 1.8 | 0.3 | 3.2 | 0.0 | 2.6 | 0.823317039 | 265.5  | 6.9  | 268.1  | 7.5  | 290.7  | 41.5 | 8.7   |
| Spot 36 | 4345406  | 6942570  | 2403354.5 | 44.5  | 11.2 | 0.8 | 3.1 | 1.3 | 0.3 | 1.1 | 0.824115025 | 1442.1 | 14.3 | 1433.9 | 10.3 | 1421.8 | 14.5 | -1.4  |
| Spot 37 | 964734   | 1541337  | 39910.7   | 4.2   | 11.7 | 0.9 | 2.6 | 1.5 | 0.2 | 1.2 | 0.786091192 | 1256.2 | 13.4 | 1287.4 | 10.9 | 1339.8 | 17.8 | 6.2   |

|         |          |          |          |      |      |     |     |     |     |     |             |        |      |        |      |        |      |       |
|---------|----------|----------|----------|------|------|-----|-----|-----|-----|-----|-------------|--------|------|--------|------|--------|------|-------|
| Spot 38 | 385494   | 615897   | 17438.3  | 2.1  | 14.0 | 1.8 | 1.4 | 2.5 | 0.1 | 1.8 | 0.697771077 | 863.0  | 14.4 | 892.3  | 15.1 | 965.7  | 37.3 | 10.6  |
| Spot 40 | 4509056  | 7204031  | 145081.0 | 19.4 | 19.9 | 1.0 | 0.3 | 1.7 | 0.0 | 1.3 | 0.799402005 | 243.0  | 3.2  | 240.6  | 3.6  | 217.9  | 23.3 | -11.5 |
| Spot 41 | 6806526  | 10874654 | 12035.9  | 4.4  | 20.1 | 2.5 | 0.1 | 3.4 | 0.0 | 2.3 | 0.672941604 | 77.7   | 1.8  | 79.9   | 2.6  | 145.1  | 58.6 | 46.5  |
| Spot 42 | 1625898  | 2597666  | 38978.2  | 1.3  | 10.1 | 0.8 | 3.7 | 1.8 | 0.3 | 1.6 | 0.882675382 | 1538.1 | 21.4 | 1574.6 | 14.2 | 1623.8 | 15.5 | 5.3   |
| Spot 44 | 736701   | 1177013  | 14423.2  | 1.6  | 12.0 | 1.1 | 2.4 | 2.0 | 0.2 | 1.6 | 0.794304397 | 1214.4 | 17.2 | 1237.0 | 14.0 | 1276.7 | 23.2 | 4.9   |
| Spot 45 | 3012446  | 4812926  | 34070.2  | 2.0  | 18.1 | 1.4 | 0.5 | 2.0 | 0.1 | 1.4 | 0.714466803 | 431.0  | 5.8  | 430.4  | 6.9  | 426.7  | 30.6 | -1.0  |
| Spot 46 | 4985726  | 7965598  | 25398.0  | 4.9  | 16.3 | 0.8 | 0.9 | 1.8 | 0.1 | 1.6 | 0.884846105 | 628.3  | 9.5  | 632.5  | 8.4  | 647.6  | 17.9 | 3.0   |
| Spot 47 | 1521020  | 2430103  | 653.3    | 3.3  | 20.8 | 3.3 | 0.0 | 4.5 | 0.0 | 2.0 | 0.440219464 | 66.6   | 1.3  | 35.6   | 1.6  | NA     | NA   |       |
| Spot 48 | 10816115 | 17280697 | 35179.7  | 2.3  | 11.3 | 0.9 | 2.8 | 1.7 | 0.2 | 1.4 | 0.837093245 | 1333.5 | 17.2 | 1358.9 | 12.8 | 1398.9 | 17.9 | 4.7   |
| Spot 49 | 1627885  | 2600840  | 13543.8  | 2.6  | 12.8 | 0.9 | 1.9 | 1.6 | 0.2 | 1.2 | 0.780541709 | 1061.8 | 11.9 | 1087.3 | 10.4 | 1138.7 | 19.3 | 6.8   |
| Spot 50 | 4433427  | 7083200  | 303462.6 | 13.2 | 8.1  | 0.8 | 5.8 | 1.6 | 0.3 | 1.4 | 0.864039696 | 1874.2 | 22.4 | 1950.3 | 13.8 | 2032.0 | 14.2 | 7.8   |
| Spot 51 | 2050961  | 3276780  | 16307.4  | 1.4  | 18.6 | 1.9 | 0.3 | 2.4 | 0.0 | 1.5 | 0.603574522 | 259.2  | 3.8  | 267.9  | 5.8  | 344.5  | 44.2 | 24.8  |
| Spot 52 | 1069328  | 1708445  | 8241.9   | 3.4  | 13.5 | 1.2 | 1.7 | 1.8 | 0.2 | 1.4 | 0.761373384 | 994.7  | 12.6 | 1000.9 | 11.5 | 1014.4 | 23.6 | 1.9   |
| Spot 53 | 3213078  | 5133472  | 32469.3  | 4.2  | 15.9 | 0.9 | 1.0 | 1.7 | 0.1 | 1.4 | 0.832860931 | 675.8  | 9.0  | 683.4  | 8.4  | 708.4  | 19.8 | 4.6   |
| Spot 54 | 4491501  | 7175983  | 66981.3  | 4.4  | 13.2 | 1.0 | 1.8 | 1.5 | 0.2 | 1.1 | 0.731024095 | 1015.7 | 10.1 | 1041.0 | 9.6  | 1094.4 | 20.1 | 7.2   |
| Spot 55 | 1860239  | 2972068  | 9361.8   | 1.4  | 16.8 | 0.9 | 0.7 | 1.7 | 0.1 | 1.4 | 0.844415104 | 567.2  | 7.8  | 563.2  | 7.3  | 546.7  | 19.8 | -3.8  |
| Spot 57 | 226760   | 362291   | 2797.0   | 2.8  | 12.3 | 3.7 | 2.0 | 5.5 | 0.2 | 3.7 | 0.662912082 | 1115.6 | 37.5 | 1115.8 | 37.4 | 1116.3 | 82.6 | 0.1   |
| Spot 58 | 523940   | 837089   | 4033.0   | 2.9  | 12.0 | 2.4 | 2.0 | 3.1 | 0.2 | 1.9 | 0.608692359 | 1081.8 | 18.5 | 1122.3 | 20.8 | 1201.6 | 47.8 | 10.0  |
| Spot 59 | 715302   | 1142823  | 34481.3  | 2.4  | 14.1 | 1.5 | 1.5 | 2.3 | 0.2 | 1.7 | 0.732402094 | 946.6  | 14.6 | 946.9  | 13.9 | 947.6  | 31.6 | 0.1   |
| Spot 60 | 1654821  | 2643875  | 11545.0  | 2.5  | 18.2 | 2.0 | 0.4 | 2.6 | 0.1 | 1.6 | 0.610382407 | 347.7  | 5.4  | 350.3  | 7.8  | 368.2  | 46.7 | 5.6   |
| Spot 61 | 1602293  | 2559953  | 197463.4 | 7.3  | 12.4 | 1.0 | 2.3 | 1.8 | 0.2 | 1.5 | 0.82958433  | 1210.2 | 16.7 | 1213.8 | 12.9 | 1220.4 | 20.1 | 0.8   |
| Spot 62 | 1627598  | 2600381  | 32392.1  | 5.7  | 12.9 | 2.6 | 1.9 | 2.8 | 0.2 | 1.2 | 0.410343997 | 1040.4 | 11.1 | 1071.0 | 18.6 | 1133.8 | 51.2 | 8.2   |
| Spot 63 | 429682   | 686494   | 3349.8   | 3.4  | 12.4 | 3.1 | 1.6 | 3.5 | 0.2 | 1.6 | 0.438844208 | 909.3  | 13.2 | 971.5  | 22.2 | 1114.9 | 63.6 | 18.4  |
| Spot 64 | 1188949  | 1899560  | 39537.3  | 2.3  | 19.1 | 1.4 | 0.3 | 1.9 | 0.0 | 1.3 | 0.688978225 | 275.4  | 3.5  | 276.9  | 4.6  | 290.1  | 31.5 | 5.1   |
| Spot 65 | 18382634 | 29369578 | 53023.3  | 18.5 | 13.3 | 0.9 | 1.5 | 1.6 | 0.1 | 1.3 | 0.834169088 | 886.2  | 11.1 | 940.9  | 9.9  | 1071.3 | 17.8 | 17.3  |
| Spot 66 | 6744889  | 10776179 | 42896.7  | 9.4  | 13.4 | 0.9 | 1.2 | 2.7 | 0.1 | 2.6 | 0.938952826 | 692.6  | 16.8 | 785.9  | 14.9 | 1060.8 | 18.9 | 34.7  |
| Spot 67 | 1102164  | 1760905  | 57437.1  | 2.7  | 14.3 | 2.6 | 1.6 | 4.8 | 0.2 | 4.0 | 0.841051925 | 972.3  | 36.2 | 959.2  | 29.6 | 929.3  | 53.0 | -4.6  |
| Spot 68 | 1945240  | 3107872  | 214053.7 | 2.6  | 10.7 | 0.8 | 3.2 | 1.5 | 0.2 | 1.2 | 0.830057276 | 1407.4 | 15.7 | 1446.6 | 11.6 | 1504.6 | 15.8 | 6.5   |
| Spot 69 | 1875655  | 2996698  | 5260.6   | 1.1  | 18.4 | 1.7 | 0.3 | 3.2 | 0.0 | 2.0 | 0.605500604 | 282.9  | 5.4  | 282.6  | 8.0  | 279.9  | 59.0 | -1.1  |
| Spot 70 | 3713837  | 5933526  | 20066.8  | 10.0 | 15.9 | 0.9 | 0.9 | 1.4 | 0.1 | 1.1 | 0.743554088 | 659.8  | 6.7  | 665.2  | 7.0  | 683.5  | 20.4 | 3.5   |
| Spot 71 | 5938327  | 9487549  | 12119.6  | 14.0 | 20.1 | 1.6 | 0.2 | 2.7 | 0.0 | 2.2 | 0.799224066 | 226.4  | 4.9  | 218.6  | 5.4  | 134.9  | 38.6 | -67.8 |
| Spot 73 | 2312275  | 3694276  | 20405.0  | 2.0  | 18.8 | 1.2 | 0.3 | 2.0 | 0.0 | 1.6 | 0.7890935   | 260.5  | 4.0  | 265.6  | 4.7  | 311.0  | 28.0 | 16.2  |
| Spot 74 | 2237394  | 3574642  | 89494.1  | 1.1  | 17.3 | 1.9 | 0.6 | 2.9 | 0.1 | 2.1 | 0.745046753 | 450.6  | 9.3  | 461.6  | 10.6 | 516.8  | 41.9 | 12.8  |
| Spot 75 | 2805662  | 4482552  | 92736.9  | 3.0  | 12.5 | 1.0 | 2.1 | 1.6 | 0.2 | 1.3 | 0.792744794 | 1142.8 | 13.1 | 1160.6 | 10.9 | 1194.0 | 19.0 | 4.3   |
| Spot 76 | 858732   | 1371980  | 3128.1   | 4.3  | 16.6 | 2.5 | 0.4 | 3.7 | 0.1 | 1.4 | 0.375171491 | 347.9  | 4.7  | 358.3  | 11.3 | 426.0  | 77.3 | 18.3  |
| Spot 77 | 1818358  | 2905156  | 98380.8  | 2.8  | 16.2 | 1.7 | 0.8 | 2.4 | 0.1 | 1.6 | 0.693987478 | 564.9  | 8.9  | 582.4  | 10.5 | 651.1  | 36.6 | 13.2  |
| Spot 78 | 1606635  | 2566890  | 17263.2  | 2.0  | 19.0 | 1.7 | 0.3 | 2.4 | 0.0 | 1.7 | 0.68299664  | 273.0  | 4.4  | 273.1  | 5.8  | 273.5  | 40.5 | 0.2   |
| Spot 79 | 5354014  | 8554003  | 8019.0   | 1.6  | 19.1 | 1.2 | 0.3 | 1.7 | 0.0 | 1.2 | 0.723041449 | 262.2  | 3.2  | 258.2  | 3.9  | 221.9  | 27.3 | -18.2 |
| Spot 81 | 1491724  | 2383299  | 7989.2   | 1.2  | 18.5 | 3.0 | 0.3 | 3.6 | 0.0 | 1.9 | 0.520133934 | 267.1  | 4.9  | 269.4  | 8.6  | 289.5  | 70.7 | 7.7   |
| Spot 83 | 1578025  | 2521179  | 50507.3  | 3.2  | 13.8 | 0.9 | 1.6 | 1.4 | 0.2 | 1.1 | 0.788351244 | 980.3  | 10.0 | 980.4  | 8.8  | 980.5  | 17.5 | 0.0   |
| Spot 84 | 494706   | 790382   | 6675.9   | 1.8  | 13.4 | 2.1 | 1.4 | 4.8 | 0.1 | 4.3 | 0.899778173 | 835.2  | 33.9 | 882.5  | 28.3 | 1003.0 | 42.6 | 16.7  |
| Spot 85 | 1702978  | 2720815  | 16078.3  | 1.2  | 13.7 | 1.1 | 1.5 | 1.9 | 0.2 | 1.5 | 0.791188865 | 931.2  | 12.9 | 947.9  | 11.6 | 986.8  | 23.5 | 5.6   |
| Spot 86 | 1613642  | 2578084  | 1805.0   | 1.1  | 20.6 | 2.0 | 0.2 | 3.6 | 0.0 | 3.0 | 0.811149719 | 176.3  | 5.1  | 145.3  | 4.9  | NA     | NA   |       |



|          |         |          |           |      |      |      |     |      |     |     |             |        |      |        |      |        |       |        |
|----------|---------|----------|-----------|------|------|------|-----|------|-----|-----|-------------|--------|------|--------|------|--------|-------|--------|
| Spot 87  | 8800814 | 14060889 | 35757.8   | 1.9  | 19.1 | 0.9  | 0.3 | 1.4  | 0.0 | 1.1 | 0.775720871 | 267.7  | 2.9  | 268.5  | 3.3  | 275.7  | 20.3  | 2.9    |
| Spot 89  | 4471581 | 7144158  | 43265.7   | 1.5  | 19.4 | 1.4  | 0.2 | 2.2  | 0.0 | 1.7 | 0.777327078 | 223.2  | 3.7  | 224.9  | 4.4  | 242.0  | 31.9  | 7.7    |
| Spot 90  | 1018082 | 1626569  | 3601.3    | 1.6  | 17.7 | 4.0  | 0.2 | 4.5  | 0.0 | 2.0 | 0.436762035 | 166.8  | 3.3  | 175.6  | 7.3  | 296.5  | 92.8  | 43.8   |
| Spot 91  | 3569954 | 5703646  | 31236.5   | 2.5  | 12.6 | 1.1  | 2.0 | 1.6  | 0.2 | 1.2 | 0.746974201 | 1079.1 | 11.9 | 1109.1 | 10.8 | 1168.3 | 21.1  | 7.6    |
| Spot 92  | 2154421 | 3442076  | 5586.1    | 10.0 | 17.7 | 2.9  | 0.3 | 3.7  | 0.0 | 1.8 | 0.493805798 | 240.2  | 4.3  | 251.4  | 8.2  | 357.4  | 72.6  | 32.8   |
| Spot 93  | 1678063 | 2681009  | 9099.3    | 1.3  | 19.1 | 2.7  | 0.2 | 3.6  | 0.0 | 2.3 | 0.642860039 | 200.8  | 4.5  | 202.7  | 6.6  | 225.0  | 63.2  | 10.7   |
| Spot 95  | 2723227 | 4350846  | 864.7     | 1.8  | 20.7 | 3.4  | 0.0 | 5.7  | 0.0 | 3.6 | 0.628589959 | 56.6   | 2.0  | 37.3   | 2.1  | NA     | NA    |        |
| Spot 96  | 1764285 | 2818763  | 4912.4    | 1.6  | 20.6 | 2.3  | 0.2 | 3.3  | 0.0 | 2.1 | 0.645795788 | 165.0  | 3.4  | 152.3  | 4.6  | NA     | NA    |        |
| Spot 97  | 1448346 | 2313993  | 18164.9   | 1.9  | 18.4 | 1.3  | 0.3 | 2.0  | 0.0 | 1.5 | 0.752024525 | 267.3  | 4.0  | 274.5  | 4.9  | 337.1  | 30.2  | 20.7   |
| Spot 99  | 1790248 | 2860244  | 32652.8   | 3.7  | 14.2 | 1.1  | 1.5 | 4.6  | 0.2 | 4.4 | 0.971874528 | 923.1  | 38.3 | 920.2  | 27.7 | 913.2  | 22.2  | -1.1   |
| Spot 100 | 2026083 | 3237033  | 17362.5   | 13.1 | 13.8 | 1.1  | 1.6 | 1.8  | 0.2 | 1.4 | 0.77548757  | 981.0  | 12.7 | 977.2  | 11.3 | 968.8  | 23.3  | -1.2   |
| Spot 101 | 351095  | 560938   | 8325.7    | 2.3  | 14.1 | 1.5  | 1.4 | 2.4  | 0.1 | 1.5 | 0.640811342 | 895.9  | 12.6 | 893.7  | 14.0 | 888.1  | 37.4  | -0.9   |
| Spot 102 | 1742121 | 2783353  | 364795.2  | 2.5  | 12.1 | 1.0  | 2.4 | 1.5  | 0.2 | 1.2 | 0.770461696 | 1214.9 | 13.1 | 1228.1 | 10.9 | 1251.4 | 19.1  | 2.9    |
| Spot 103 | 6224514 | 9944786  | 4572.3    | 1.7  | 14.1 | 1.2  | 0.7 | 1.9  | 0.1 | 1.5 | 0.786701353 | 449.6  | 6.6  | 522.5  | 7.9  | 855.1  | 24.8  | 47.4   |
| Spot 105 | 639546  | 1021791  | 1343.5    | 1.0  | 16.8 | 4.3  | 0.3 | 5.5  | 0.0 | 3.2 | 0.59055595  | 247.8  | 7.8  | 235.5  | 11.5 | 114.3  | 103.9 | -116.8 |
| Spot 106 | 791873  | 1265159  | 4568.4    | 3.0  | 16.6 | 2.4  | 0.6 | 2.9  | 0.1 | 1.6 | 0.549616472 | 472.1  | 7.3  | 473.9  | 11.0 | 482.9  | 53.8  | 2.3    |
| Spot 107 | 484171  | 773551   | 5380.7    | 2.4  | 12.4 | 1.3  | 2.2 | 2.5  | 0.2 | 1.8 | 0.693902199 | 1197.3 | 19.2 | 1178.1 | 17.6 | 1142.9 | 36.2  | -4.8   |
| Spot 108 | 2956230 | 4723112  | 12814.7   | 1.1  | 19.9 | 2.1  | 0.2 | 3.0  | 0.0 | 2.2 | 0.736145624 | 163.3  | 3.6  | 162.1  | 4.6  | 144.0  | 48.3  | -13.5  |
| Spot 109 | 4776414 | 7631184  | 4821026.6 | 7.4  | 11.9 | 0.9  | 2.4 | 1.8  | 0.2 | 1.6 | 0.859142954 | 1218.1 | 17.6 | 1240.4 | 13.2 | 1279.3 | 18.4  | 4.8    |
| Spot 110 | 723938  | 1156621  | 5841.0    | 1.4  | 5.2  | 16.6 | 0.7 | 17.0 | 0.0 | 3.6 | 0.215120695 | 179.5  | 6.5  | 562.1  | 73.4 | 2741.5 | 274.6 | 93.5   |

**Run 4 NM8A (discordant)**

|          |         |         |          |     |      |      |     |      |     |      |             |        |       |        |      |        |       |        |
|----------|---------|---------|----------|-----|------|------|-----|------|-----|------|-------------|--------|-------|--------|------|--------|-------|--------|
| Spot 104 | 340681  | 544300  | 7526.6   | 1.7 | 11.9 | 2.8  | 1.9 | 4.4  | 0.2 | 3.4  | 0.774972995 | 986.9  | 31.4  | 1086.8 | 29.6 | 1293.0 | 54.4  | 23.7   |
| Spot 12  | 358968  | 573516  | 1191.3   | 1.4 | 17.8 | 6.6  | 0.2 | 8.9  | 0.0 | 6.0  | 0.676079042 | 175.6  | 10.5  | 197.1  | 16.0 | 463.1  | 146.1 | 62.1   |
| Spot 14  | 2651014 | 4235473 | 5667.2   | 1.3 | 20.5 | 2.5  | 0.3 | 7.1  | 0.0 | 6.7  | 0.935729808 | 287.3  | 18.8  | 271.7  | 17.0 | 139.3  | 59.1  | -106.3 |
| Spot 29  | 316169  | 505137  | 592.9    | 1.7 | 31.6 | 12.2 | 0.1 | 14.2 | 0.0 | 7.2  | 0.507756888 | 192.7  | 13.7  | 126.2  | 16.8 | NA     | NA    |        |
| Spot 30  | 1892053 | 3022896 | 5059.6   | 0.7 | 20.9 | 2.5  | 0.2 | 9.6  | 0.0 | 9.2  | 0.964907601 | 188.8  | 17.2  | 181.5  | 15.9 | 87.0   | 59.6  | -117.1 |
| Spot 39  | 853750  | 1364020 | 664929.8 | 2.4 | 11.7 | 1.6  | 2.9 | 4.3  | 0.2 | 4.0  | 0.928641057 | 1429.4 | 51.2  | 1388.5 | 32.5 | 1326.3 | 30.9  | -7.8   |
| Spot 43  | 201351  | 321694  | 304.7    | 1.4 | 31.2 | 12.9 | 0.1 | 18.8 | 0.0 | 13.7 | 0.726172518 | 169.9  | 22.9  | 113.2  | 20.2 | NA     | NA    |        |
| Spot 56  | 615365  | 983156  | 2723.8   | 2.8 | 15.6 | 1.7  | 1.3 | 2.3  | 0.1 | 1.5  | 0.665396863 | 882.0  | 12.6  | 845.0  | 13.1 | 749.1  | 36.1  | -17.7  |
| Spot 72  | 299074  | 477824  | 259.3    | 1.3 | 91.9 | 8.9  | 0.0 | 10.1 | 0.0 | 4.8  | 0.478858447 | 189.3  | 9.0   | 44.4   | 4.4  | NA     | NA    |        |
| Spot 80  | 3873664 | 6188877 | 144188.9 | 5.5 | 15.9 | 2.9  | 1.3 | 14.8 | 0.2 | 14.5 | 0.980719735 | 930.3  | 126.0 | 864.0  | 86.5 | 697.4  | 61.7  | -33.4  |
| Spot 82  | 1754750 | 2803530 | 4539.2   | 1.6 | 23.7 | 2.2  | 0.2 | 9.7  | 0.0 | 9.4  | 0.972995699 | 263.5  | 24.3  | 220.2  | 19.2 | NA     | NA    |        |
| Spot 88  | 1381537 | 2207255 | 32285.2  | 3.9 | 13.0 | 1.0  | 2.2 | 1.5  | 0.2 | 1.2  | 0.781809447 | 1206.3 | 13.3  | 1174.6 | 10.7 | 1116.7 | 19.2  | -8.0   |
| Spot 94  | 271791  | 434235  | 711.3    | 2.2 | 17.1 | 14.5 | 0.3 | 19.5 | 0.0 | 12.9 | 0.664517535 | 201.7  | 25.7  | 231.0  | 40.2 | 540.8  | 319.6 | 62.7   |
| Spot 98  | 490018  | 782892  | 9515.8   | 3.4 | 16.3 | 2.3  | 1.0 | 3.2  | 0.1 | 2.2  | 0.687646786 | 752.4  | 15.5  | 727.7  | 16.5 | 652.3  | 49.5  | -15.3  |

**TABLE S21: NM8A (CA) LA-ICPMS U-Pb ZIRCON GEOCHRONOLOGY**

| Zircon<br>#  | Composition    |                       |                 |       |                                |                               |                               |                |                | Ages               |                |                    |                 |                    |      |        | % Disc. |        |
|--------------|----------------|-----------------------|-----------------|-------|--------------------------------|-------------------------------|-------------------------------|----------------|----------------|--------------------|----------------|--------------------|-----------------|--------------------|------|--------|---------|--------|
|              | U<br>(238 cps) | U (norm)<br>(238 cps) | 206Pb/<br>204Pb | U/Th  | 206Pb/ 1 $\sigma$<br>207Pb (%) | 207Pb/ 1 $\sigma$<br>235U (%) | 206Pb/ 1 $\sigma$<br>238U (%) | Error<br>Corr. | 206Pb/<br>238U | 1 $\sigma$<br>(Ma) | 207Pb/<br>235U | 1 $\sigma$<br>(Ma) | 206Pb/<br>207Pb | 1 $\sigma$<br>(Ma) |      |        |         |        |
| <b>Run 1</b> |                |                       |                 |       |                                |                               |                               |                |                |                    |                |                    |                 |                    |      |        |         |        |
| Spot 1       | 463595         | 451050                | 1366.9          | 1.7   | 23.6                           | 4.0                           | 0.2                           | 5.4            | 0.0            | 3.6                | 0.6737943      | 192.1              | 6.9             | 165.0              | 8.2  | NA     | NA      |        |
| Spot 10      | 747837         | 727600                | 14651.5         | 1.9   | 19.3                           | 3.6                           | 0.2                           | 6.9            | 0.0            | 5.9                | 0.8521062      | 210.3              | 12.1            | 216.3              | 13.4 | 281.7  | 82.4    | 25.4   |
| Spot 100     | 685833         | 667273                | 6282.3          | 2.8   | 12.7                           | 2.1                           | 2.2                           | 2.4            | 0.2            | 1.3                | 0.5137164      | 1167.4             | 13.4            | 1165.9             | 17.0 | 1162.9 | 41.6    | -0.4   |
| Spot 101     | 1386480        | 1348959               | 18225.5         | 4.0   | 11.9                           | 1.0                           | 2.4                           | 1.8            | 0.2            | 1.5                | 0.8391952      | 1227.6             | 16.9            | 1248.4             | 12.9 | 1284.5 | 19.1    | 4.4    |
| Spot 102     | 1016159        | 988660                | 1143.2          | 3.0   | 29.0                           | 6.7                           | 0.0                           | 7.5            | 0.0            | 3.4                | 0.4568288      | 56.8               | 1.9             | 41.8               | 3.1  | NA     | NA      |        |
| Spot 103     | 3327115        | 3237077               | 67225.5         | 2.5   | 14.1                           | 1.0                           | 1.4                           | 2.9            | 0.1            | 2.7                | 0.9365422      | 871.8              | 22.1            | 895.5              | 17.2 | 954.4  | 20.7    | 8.7    |
| Spot 104     | 715609         | 696243                | 13185.7         | 1.2   | 20.2                           | 2.7                           | 0.3                           | 3.8            | 0.0            | 2.6                | 0.6973488      | 304.8              | 7.8             | 289.9              | 9.5  | 171.2  | 63.1    | -78.1  |
| Spot 105     | 911613         | 886943                | 17214.8         | 2.4   | 12.8                           | 1.5                           | 2.2                           | 2.1            | 0.2            | 1.4                | 0.6776112      | 1176.5             | 15.1            | 1169.3             | 14.4 | 1155.9 | 30.3    | -1.8   |
| Spot 108     | 2067378        | 2011431               | 8014.8          | 1.3   | 20.1                           | 1.9                           | 0.3                           | 2.3            | 0.0            | 1.4                | 0.5915896      | 274.4              | 3.7             | 265.0              | 5.4  | 182.5  | 43.7    | -50.3  |
| Spot 113     | 2035225        | 1980148               | 61531.1         | 1.7   | 12.1                           | 0.9                           | 2.4                           | 2.0            | 0.2            | 1.8                | 0.8913702      | 1246.0             | 20.3            | 1250.8             | 14.4 | 1259.1 | 17.8    | 1.0    |
| Spot 114     | 353179         | 343621                | 9859.2          | 2.3   | 18.2                           | 4.0                           | 0.3                           | 4.5            | 0.0            | 2.1                | 0.4680306      | 228.9              | 4.8             | 245.4              | 9.8  | 405.5  | 89.4    | 43.5   |
| Spot 116     | 1030991        | 1003091               | 4344.4          | 2.1   | 19.5                           | 2.9                           | 0.3                           | 4.2            | 0.0            | 3.1                | 0.732879       | 256.4              | 7.8             | 255.6              | 9.5  | 248.7  | 66.1    | -3.1   |
| Spot 118     | 1902760        | 1851267               | 29485.8         | 1.5   | 19.4                           | 1.5                           | 0.3                           | 2.3            | 0.0            | 1.8                | 0.7730178      | 279.4              | 4.9             | 277.6              | 5.7  | 262.8  | 34.0    | -6.3   |
| Spot 12      | 3444230        | 3351023               | 339857.5        | 39.5  | 14.8                           | 3.1                           | 0.9                           | 3.5            | 0.1            | 1.6                | 0.4684793      | 614.2              | 9.6             | 669.6              | 17.2 | 860.9  | 64.2    | 28.7   |
| Spot 120     | 528868         | 514556                | 18568.0         | 1.3   | 14.7                           | 7.1                           | 0.3                           | 9.2            | 0.0            | 5.8                | 0.6297216      | 170.5              | 9.7             | 228.2              | 18.8 | 874.7  | 148.2   | 80.5   |
| Spot 121     | 453775         | 441495                | 651.5           | 1.5   | 20.6                           | 25.0                          | 0.2                           | 25.2           | 0.0            | 3.6                | 0.1417415      | 190.8              | 6.7             | 186.2              | 42.9 | 128.3  | NA      | -48.7  |
| Spot 122     | 3316014        | 3226277               | 27434.6         | 7.5   | 12.3                           | 0.7                           | 2.3                           | 1.5            | 0.2            | 1.3                | 0.8770754      | 1211.3             | 14.5            | 1219.9             | 10.6 | 1235.3 | 14.1    | 1.9    |
| Spot 123     | 2836352        | 2759595               | 44967.1         | 1.5   | 19.9                           | 2.6                           | 0.1                           | 3.2            | 0.0            | 1.8                | 0.5596839      | 61.0               | 1.1             | 64.8               | 2.0  | 207.9  | 61.3    | 70.7   |
| Spot 124     | 2575192        | 2505503               | 8498.2          | 4.9   | 19.8                           | 1.4                           | 0.3                           | 1.9            | 0.0            | 1.3                | 0.6954399      | 245.9              | 3.2             | 243.1              | 4.1  | 215.9  | 31.3    | -13.9  |
| Spot 125     | 1999448        | 1945340               | 3963.2          | 3.4   | 21.2                           | 1.9                           | 0.1                           | 2.6            | 0.0            | 1.8                | 0.6704559      | 146.5              | 2.5             | 141.5              | 3.5  | 57.6   | 46.3    | -154.3 |
| Spot 126     | 2726050        | 2652278               | 35456.6         | 3.2   | 19.6                           | 1.5                           | 0.3                           | 2.3            | 0.0            | 1.8                | 0.7726921      | 243.1              | 4.3             | 243.0              | 5.1  | 241.7  | 34.4    | -0.6   |
| Spot 128     | 1936562        | 1884155               | 9759.0          | 3.7   | 20.5                           | 3.3                           | 0.2                           | 6.4            | 0.0            | 5.4                | 0.8523262      | 192.0              | 10.3            | 187.5              | 10.9 | 131.5  | 78.6    | -46.1  |
| Spot 129     | 591657         | 575646                | 7664.9          | 4.6   | 13.0                           | 1.1                           | 1.9                           | 2.3            | 0.2            | 2.0                | 0.8709683      | 1081.9             | 19.7            | 1094.7             | 15.2 | 1120.3 | 22.3    | 3.4    |
| Spot 13      | 1653408        | 1608664               | 35493.2         | 6.0   | 19.0                           | 2.5                           | 0.3                           | 3.8            | 0.0            | 3.0                | 0.7699817      | 242.2              | 7.0             | 248.4              | 8.5  | 306.7  | 55.9    | 21.0   |
| Spot 130     | 1417306        | 1378952               | 6861.2          | 1.8   | 20.4                           | 1.7                           | 0.3                           | 2.5            | 0.0            | 1.9                | 0.7538698      | 275.7              | 5.2             | 262.4              | 5.9  | 146.0  | 39.1    | -88.8  |
| Spot 131     | 1756718        | 1709178               | 23251.5         | 193.9 | 16.3                           | 1.9                           | 0.7                           | 4.3            | 0.1            | 3.9                | 0.9005616      | 496.6              | 18.5            | 524.2              | 17.6 | 646.4  | 40.1    | 23.2   |
| Spot 132     | 1032143        | 1004211               | 26832.4         | 1.7   | 14.2                           | 1.0                           | 1.4                           | 1.8            | 0.1            | 1.5                | 0.821668       | 894.9              | 12.4            | 906.0              | 10.8 | 933.3  | 21.1    | 4.1    |
| Spot 133     | 1532094        | 1490633               | 10796.0         | 3.5   | 13.1                           | 0.7                           | 1.9                           | 3.3            | 0.2            | 3.3                | 0.975334       | 1053.9             | 31.6            | 1072.3             | 22.1 | 1110.0 | 14.7    | 5.1    |
| Spot 134     | 1053403        | 1024896               | 36080.1         | 1.7   | 11.6                           | 1.0                           | 2.7                           | 1.9            | 0.2            | 1.7                | 0.8619635      | 1306.8             | 19.6            | 1318.7             | 14.2 | 1337.9 | 18.8    | 2.3    |
| Spot 135     | 1197225        | 1164826               | 13791.8         | 2.9   | 12.3                           | 1.2                           | 2.3                           | 1.6            | 0.2            | 1.1                | 0.6759719      | 1227.1             | 12.3            | 1227.5             | 11.6 | 1228.4 | 23.5    | 0.1    |
| Spot 136     | 1489408        | 1449102               | 30055.0         | 4.9   | 13.9                           | 1.0                           | 1.6                           | 2.2            | 0.2            | 2.0                | 0.9005995      | 967.8              | 17.9            | 973.2              | 13.8 | 985.5  | 19.5    | 1.8    |
| Spot 137     | 664351         | 646372                | 14313.4         | 2.5   | 13.6                           | 2.5                           | 1.4                           | 3.8            | 0.1            | 2.9                | 0.7639931      | 846.1              | 23.1            | 899.7              | 22.8 | 1033.8 | 49.8    | 18.2   |
| Spot 138     | 2372052        | 2307860               | 9099.0          | 1.2   | 19.5                           | 1.2                           | 0.3                           | 1.8            | 0.0            | 1.4                | 0.7368186      | 273.6              | 3.6             | 271.4              | 4.4  | 252.7  | 28.7    | -8.3   |
| Spot 139     | 302840         | 294645                | 970.6           | 1.3   | 29.1                           | 15.2                          | 0.2                           | 16.1           | 0.0            | 5.3                | 0.3300656      | 203.5              | 10.6            | 143.5              | 21.6 | NA     | NA      |        |
| Spot 140     | 864730         | 841329                | 6950.3          | 5.6   | 15.3                           | 2.7                           | 1.0                           | 3.6            | 0.1            | 2.4                | 0.674998       | 700.0              | 16.1            | 720.5              | 18.6 | 784.6  | 55.9    | 10.8   |
| Spot 141     | 1801996        | 1753231               | 39748.3         | 4.0   | 10.6                           | 0.9                           | 3.5                           | 1.6            | 0.3            | 1.4                | 0.8343084      | 1529.1             | 18.5            | 1525.4             | 12.8 | 1520.1 | 16.9    | -0.6   |
| Spot 142     | 3492020        | 3397519               | 71091.1         | 0.7   | 20.5                           | 1.3                           | 0.2                           | 1.8            | 0.0            | 1.2                | 0.6791409      | 171.4              | 2.0             | 169.0              | 2.7  | 134.5  | 30.2    | -27.5  |
| Spot 143     | 1311761        | 1276263               | 7066.4          | 4.2   | 12.5                           | 1.6                           | 2.3                           | 2.3            | 0.2            | 1.6                | 0.7171186      | 1204.3             | 18.1            | 1199.5             | 16.2 | 1190.8 | 31.6    | -1.1   |

|          |         |         |          |      |      |      |     |      |     |     |           |        |      |        |      |        |       |        |
|----------|---------|---------|----------|------|------|------|-----|------|-----|-----|-----------|--------|------|--------|------|--------|-------|--------|
| Spot 144 | 1714269 | 1667878 | 31743.8  | 3.1  | 13.5 | 1.0  | 1.8 | 1.7  | 0.2 | 1.3 | 0.8038831 | 1019.4 | 12.5 | 1027.8 | 10.7 | 1045.5 | 19.9  | 2.5    |
| Spot 145 | 1125750 | 1095286 | 14939.9  | 2.5  | 12.8 | 0.9  | 2.0 | 1.5  | 0.2 | 1.2 | 0.8218622 | 1088.6 | 12.3 | 1110.6 | 10.1 | 1153.8 | 16.9  | 5.6    |
| Spot 146 | 407105  | 396088  | 3581.1   | 3.0  | 14.7 | 3.8  | 1.2 | 7.1  | 0.1 | 6.0 | 0.8444627 | 757.2  | 42.7 | 784.9  | 38.7 | 864.2  | 78.6  | 12.4   |
| Spot 147 | 1886992 | 1835926 | 6490.4   | 9.7  | 20.3 | 1.5  | 0.3 | 1.9  | 0.0 | 1.2 | 0.6240334 | 239.1  | 2.7  | 232.3  | 3.9  | 164.5  | 33.9  | -45.4  |
| Spot 148 | 569187  | 553783  | 6770.0   | 2.6  | 20.1 | 2.7  | 0.3 | 3.4  | 0.0 | 2.1 | 0.6213561 | 247.0  | 5.1  | 241.3  | 7.3  | 186.5  | 61.8  | -32.4  |
| Spot 15  | 1114443 | 1084284 | 26587.7  | 3.0  | 12.7 | 1.0  | 2.1 | 2.0  | 0.2 | 1.7 | 0.8757939 | 1156.5 | 18.4 | 1161.3 | 13.7 | 1170.4 | 19.0  | 1.2    |
| Spot 150 | 2932570 | 2853209 | 38684.5  | 1.4  | 19.9 | 2.3  | 0.2 | 3.0  | 0.0 | 1.9 | 0.6428239 | 171.6  | 3.3  | 173.9  | 4.8  | 205.1  | 53.2  | 16.4   |
| Spot 153 | 1563580 | 1521267 | 35513.5  | 2.6  | 12.7 | 0.8  | 2.2 | 1.4  | 0.2 | 1.2 | 0.8246656 | 1183.2 | 12.6 | 1175.3 | 9.9  | 1160.9 | 15.9  | -1.9   |
| Spot 156 | 939437  | 914014  | 16998.4  | 3.0  | 12.9 | 1.1  | 2.0 | 2.0  | 0.2 | 1.6 | 0.8140849 | 1085.5 | 16.0 | 1102.3 | 13.3 | 1135.8 | 22.8  | 4.4    |
| Spot 157 | 1159771 | 1128386 | 6597.2   | 15.7 | 15.3 | 1.2  | 1.1 | 2.0  | 0.1 | 1.6 | 0.7998159 | 740.0  | 11.3 | 751.2  | 10.8 | 784.8  | 25.6  | 5.7    |
| Spot 158 | 1077997 | 1048825 | 9031.3   | 3.9  | 14.2 | 1.2  | 1.4 | 1.9  | 0.1 | 1.5 | 0.7798786 | 889.1  | 12.6 | 903.4  | 11.7 | 938.4  | 25.0  | 5.2    |
| Spot 159 | 1036186 | 1008145 | 16808.3  | 1.9  | 14.0 | 1.7  | 1.4 | 2.0  | 0.1 | 1.0 | 0.518724  | 878.2  | 8.6  | 903.0  | 12.0 | 964.0  | 35.1  | 8.9    |
| Spot 16  | 152484  | 148358  | 2081.6   | 1.7  | 12.2 | 5.5  | 2.0 | 6.8  | 0.2 | 3.9 | 0.5805813 | 1062.0 | 38.6 | 1121.6 | 46.1 | 1238.9 | 108.4 | 14.3   |
| Spot 160 | 1570129 | 1527638 | 15672.3  | 2.9  | 12.9 | 0.7  | 2.1 | 1.2  | 0.2 | 0.9 | 0.7890422 | 1138.1 | 9.7  | 1135.4 | 8.1  | 1130.2 | 14.4  | -0.7   |
| Spot 161 | 1539504 | 1497842 | 173801.2 | 3.9  | 12.5 | 0.8  | 2.3 | 1.9  | 0.2 | 1.7 | 0.9054171 | 1204.9 | 19.0 | 1203.9 | 13.5 | 1201.9 | 16.0  | -0.3   |
| Spot 162 | 2490298 | 2422906 | 71155.7  | 1.3  | 18.9 | 1.5  | 0.3 | 2.7  | 0.0 | 2.2 | 0.8218453 | 262.7  | 5.7  | 269.4  | 6.4  | 328.2  | 34.8  | 20.0   |
| Spot 164 | 1115619 | 1085428 | 24568.2  | 1.8  | 13.1 | 1.0  | 1.9 | 1.4  | 0.2 | 1.0 | 0.6796886 | 1066.4 | 9.4  | 1077.0 | 9.3  | 1098.4 | 20.6  | 2.9    |
| Spot 165 | 4243241 | 4128411 | 17092.8  | 2.0  | 20.5 | 1.4  | 0.2 | 2.1  | 0.0 | 1.6 | 0.7591759 | 166.0  | 2.7  | 164.1  | 3.2  | 136.2  | 32.7  | -21.9  |
| Spot 167 | 4548387 | 4425299 | 26531.1  | 1.2  | 19.2 | 1.4  | 0.3 | 1.9  | 0.0 | 1.3 | 0.6776723 | 281.0  | 3.6  | 281.8  | 4.7  | 288.5  | 32.0  | 2.6    |
| Spot 168 | 3336185 | 3245902 | 6826.8   | 1.0  | 19.7 | 1.7  | 0.3 | 2.9  | 0.0 | 2.3 | 0.8011866 | 282.0  | 6.5  | 275.8  | 7.1  | 223.6  | 40.5  | -26.1  |
| Spot 169 | 1717052 | 1670585 | 2565.6   | 1.5  | 22.0 | 2.5  | 0.3 | 2.9  | 0.0 | 1.4 | 0.4946789 | 290.7  | 4.0  | 258.2  | 6.5  | NA     | NA    |        |
| Spot 17  | 2038418 | 1983255 | 428800.1 | 3.2  | 12.5 | 1.3  | 2.2 | 3.1  | 0.2 | 2.8 | 0.9098996 | 1159.4 | 29.5 | 1171.7 | 21.2 | 1194.5 | 25.0  | 2.9    |
| Spot 170 | 3338266 | 3247926 | 13443.8  | 1.2  | 19.6 | 1.6  | 0.3 | 2.4  | 0.0 | 1.8 | 0.7437313 | 281.0  | 4.9  | 276.3  | 5.8  | 237.0  | 37.1  | -18.6  |
| Spot 172 | 2367120 | 2303061 | 30490.3  | 3.6  | 12.4 | 1.0  | 2.2 | 1.9  | 0.2 | 1.6 | 0.8384468 | 1175.4 | 16.9 | 1189.9 | 13.1 | 1216.4 | 20.1  | 3.4    |
| Spot 173 | 1511771 | 1470859 | 11371.6  | 2.3  | 12.8 | 0.9  | 2.2 | 1.9  | 0.2 | 1.7 | 0.8825285 | 1195.7 | 18.6 | 1179.8 | 13.4 | 1150.7 | 18.0  | -3.9   |
| Spot 174 | 1438589 | 1399658 | 194742.4 | 1.6  | 13.4 | 1.0  | 1.8 | 1.6  | 0.2 | 1.3 | 0.8042949 | 1033.3 | 12.3 | 1041.6 | 10.5 | 1058.9 | 19.2  | 2.4    |
| Spot 176 | 1389826 | 1352215 | 3955.8   | 1.5  | 18.5 | 1.2  | 0.6 | 2.1  | 0.1 | 1.7 | 0.8169964 | 485.1  | 7.9  | 465.9  | 7.7  | 372.3  | 26.9  | -30.3  |
| Spot 177 | 5560652 | 5410171 | 32069.7  | 4.6  | 19.7 | 1.3  | 0.3 | 1.9  | 0.0 | 1.4 | 0.7453273 | 234.0  | 3.3  | 233.1  | 4.0  | 223.7  | 29.8  | -4.6   |
| Spot 179 | 671604  | 653429  | 1389.0   | 1.6  | 24.3 | 3.4  | 0.2 | 4.2  | 0.0 | 2.5 | 0.5938901 | 198.4  | 4.9  | 165.9  | 6.4  | NA     | NA    |        |
| Spot 180 | 3758143 | 3656441 | 26145.8  | 1.5  | 19.3 | 1.5  | 0.3 | 2.2  | 0.0 | 1.5 | 0.7052508 | 282.0  | 4.2  | 281.6  | 5.3  | 278.1  | 35.2  | -1.4   |
| Spot 181 | 610846  | 594315  | 1158.3   | 1.1  | 27.1 | 11.6 | 0.2 | 12.1 | 0.0 | 3.4 | 0.2808338 | 197.0  | 6.6  | 148.7  | 16.7 | NA     | NA    |        |
| Spot 182 | 1609308 | 1565757 | 877.2    | 2.8  | 18.9 | 4.8  | 0.1 | 5.5  | 0.0 | 2.7 | 0.4904746 | 74.5   | 2.0  | 82.6   | 4.4  | 321.7  | 109.0 | 76.8   |
| Spot 183 | 3631692 | 3533412 | 189779.9 | 2.4  | 11.2 | 0.8  | 2.9 | 1.6  | 0.2 | 1.4 | 0.8582781 | 1378.3 | 16.9 | 1390.5 | 12.0 | 1409.3 | 15.6  | 2.2    |
| Spot 184 | 577997  | 562355  | 3836.2   | 4.8  | 12.1 | 1.2  | 2.1 | 4.8  | 0.2 | 4.6 | 0.969165  | 1075.4 | 45.8 | 1137.6 | 32.6 | 1258.4 | 22.9  | 14.5   |
| Spot 185 | 1541748 | 1500025 | 23619.8  | 1.7  | 15.1 | 1.5  | 1.2 | 1.9  | 0.1 | 1.2 | 0.6141254 | 790.9  | 8.8  | 796.2  | 10.6 | 811.0  | 31.8  | 2.5    |
| Spot 186 | 1008821 | 981520  | 25621.9  | 3.2  | 12.4 | 1.1  | 2.2 | 1.8  | 0.2 | 1.4 | 0.7694909 | 1163.4 | 14.5 | 1182.5 | 12.4 | 1217.5 | 22.3  | 4.4    |
| Spot 187 | 1053596 | 1025083 | 8755.9   | 3.5  | 14.0 | 1.2  | 1.6 | 1.7  | 0.2 | 1.2 | 0.7273151 | 972.1  | 11.0 | 971.5  | 10.5 | 970.0  | 23.5  | -0.2   |
| Spot 188 | 1022818 | 995139  | 2424.2   | 1.7  | 22.1 | 2.7  | 0.3 | 3.1  | 0.0 | 1.5 | 0.4723381 | 277.0  | 4.0  | 245.7  | 6.8  | NA     | NA    |        |
| Spot 189 | 3923725 | 3817541 | 5673.5   | 3.3  | 20.1 | 1.3  | 0.2 | 1.6  | 0.0 | 1.1 | 0.6486337 | 225.3  | 2.4  | 221.4  | 3.3  | 180.7  | 29.1  | -24.7  |
| Spot 19  | 2419267 | 2353798 | 11237.7  | 1.2  | 19.1 | 1.9  | 0.3 | 3.1  | 0.0 | 2.4 | 0.7814481 | 276.0  | 6.5  | 278.8  | 7.5  | 302.8  | 43.6  | 8.9    |
| Spot 190 | 1452086 | 1412790 | 8863.1   | 1.2  | 19.5 | 4.3  | 0.1 | 4.6  | 0.0 | 1.7 | 0.3774173 | 57.4   | 1.0  | 62.2   | 2.8  | 251.5  | 98.3  | 77.2   |
| Spot 191 | 1595806 | 1552620 | 2989.5   | 16.7 | 21.7 | 2.1  | 0.2 | 2.8  | 0.0 | 1.9 | 0.6711452 | 236.6  | 4.4  | 216.4  | 5.5  | 1.4    | NA    | #####  |
| Spot 192 | 1284328 | 1249572 | 2693.4   | 2.4  | 21.0 | 2.4  | 0.3 | 3.1  | 0.0 | 2.0 | 0.6456296 | 270.3  | 5.3  | 251.1  | 7.0  | 75.2   | 56.8  | -259.2 |

|          |         |         |          |      |      |      |     |      |     |     |           |        |      |        |      |        |       |        |
|----------|---------|---------|----------|------|------|------|-----|------|-----|-----|-----------|--------|------|--------|------|--------|-------|--------|
| Spot 193 | 1418082 | 1379706 | 1531.5   | 1.9  | 20.2 | 11.6 | 0.1 | 11.9 | 0.0 | 2.7 | 0.2239134 | 68.9   | 1.8  | 71.9   | 8.3  | 171.9  | NA    | 59.9   |
| Spot 194 | 4029117 | 3920082 | 34891.5  | 11.3 | 12.1 | 1.1  | 2.0 | 2.0  | 0.2 | 1.6 | 0.8208796 | 1034.4 | 15.7 | 1106.9 | 13.5 | 1252.5 | 22.4  | 17.4   |
| Spot 195 | 3575928 | 3479157 | 12118.5  | 1.2  | 20.3 | 1.7  | 0.2 | 2.4  | 0.0 | 1.7 | 0.7012034 | 226.9  | 3.7  | 220.9  | 4.7  | 157.8  | 39.6  | -43.8  |
| Spot 196 | 3383079 | 3291527 | 47743.4  | 1.3  | 18.7 | 2.2  | 0.3 | 3.3  | 0.0 | 2.5 | 0.7421937 | 272.9  | 6.6  | 280.7  | 8.1  | 346.2  | 50.3  | 21.2   |
| Spot 197 | 1067588 | 1038698 | 540782.4 | 2.0  | 13.3 | 1.2  | 1.8 | 2.0  | 0.2 | 1.6 | 0.8090962 | 1012.4 | 15.1 | 1030.0 | 12.9 | 1067.7 | 23.6  | 5.2    |
| Spot 198 | 1213191 | 1180359 | 33057.8  | 2.0  | 17.7 | 1.9  | 0.3 | 2.2  | 0.0 | 1.2 | 0.5306615 | 274.3  | 3.2  | 295.5  | 5.7  | 467.0  | 41.6  | 41.3   |
| Spot 20  | 3523834 | 3428473 | 14269.3  | 10.7 | 19.1 | 1.9  | 0.3 | 2.6  | 0.0 | 1.8 | 0.6936717 | 252.4  | 4.4  | 256.9  | 5.9  | 298.6  | 42.4  | 15.5   |
| Spot 200 | 2001726 | 1947556 | 8616.4   | 2.3  | 17.5 | 3.6  | 0.3 | 4.0  | 0.0 | 1.7 | 0.4224318 | 271.6  | 4.5  | 295.9  | 10.2 | 492.9  | 79.5  | 44.9   |
| Spot 201 | 1253403 | 1219484 | 12322.2  | 1.1  | 12.9 | 0.8  | 2.0 | 1.4  | 0.2 | 1.1 | 0.8124001 | 1126.3 | 11.5 | 1126.8 | 9.3  | 1127.8 | 15.9  | 0.1    |
| Spot 202 | 1324631 | 1288784 | 14249.7  | 2.4  | 13.1 | 1.1  | 1.7 | 1.7  | 0.2 | 1.3 | 0.7830902 | 979.9  | 12.1 | 1017.9 | 10.9 | 1100.5 | 21.1  | 11.0   |
| Spot 203 | 510324  | 496514  | 5768.9   | 1.9  | 14.5 | 2.3  | 1.4 | 2.5  | 0.1 | 1.1 | 0.4268764 | 873.9  | 8.8  | 880.6  | 14.8 | 897.4  | 47.0  | 2.6    |
| Spot 205 | 407491  | 396464  | 404109.1 | 5.8  | 11.9 | 1.9  | 2.2 | 3.7  | 0.2 | 3.2 | 0.8642334 | 1143.1 | 33.3 | 1195.3 | 25.9 | 1290.8 | 36.0  | 11.4   |
| Spot 206 | 607801  | 591353  | 22106.4  | 2.6  | 13.6 | 1.1  | 1.6 | 1.5  | 0.2 | 1.1 | 0.6965653 | 925.2  | 9.1  | 958.2  | 9.4  | 1034.6 | 22.0  | 10.6   |
| Spot 207 | 933450  | 908189  | 1940.7   | 1.2  | 20.9 | 2.6  | 0.3 | 2.9  | 0.0 | 1.3 | 0.4450693 | 272.9  | 3.4  | 255.0  | 6.5  | 92.9   | 60.9  | -193.8 |
| Spot 209 | 2717807 | 2644258 | 74302.2  | 4.2  | 11.5 | 0.9  | 2.7 | 1.7  | 0.2 | 1.4 | 0.8416187 | 1324.8 | 17.3 | 1336.1 | 12.8 | 1354.3 | 17.9  | 2.2    |
| Spot 21  | 3903700 | 3798059 | 20351.7  | 0.8  | 21.4 | 1.2  | 0.2 | 2.1  | 0.0 | 1.6 | 0.7977844 | 191.7  | 3.1  | 180.5  | 3.4  | 35.6   | 29.8  | -437.8 |
| Spot 210 | 2984476 | 2903711 | 9439.6   | 10.6 | 19.4 | 1.2  | 0.3 | 1.7  | 0.0 | 1.2 | 0.7246843 | 279.5  | 3.4  | 277.7  | 4.1  | 262.7  | 27.0  | -6.4   |
| Spot 211 | 443707  | 431699  | 33694.5  | 3.8  | 14.1 | 1.4  | 1.5 | 1.8  | 0.1 | 1.2 | 0.6378264 | 900.2  | 9.8  | 915.6  | 11.1 | 952.8  | 28.9  | 5.5    |
| Spot 212 | 2419384 | 2353911 | 5649.0   | 1.7  | 20.3 | 1.5  | 0.3 | 2.2  | 0.0 | 1.6 | 0.7141867 | 287.0  | 4.4  | 273.3  | 5.3  | 157.7  | 36.0  | -82.0  |
| Spot 214 | 858309  | 835082  | 5883.2   | 4.6  | 14.6 | 1.2  | 1.4 | 1.7  | 0.1 | 1.3 | 0.7204351 | 898.7  | 10.5 | 895.0  | 10.3 | 885.8  | 24.9  | -1.5   |
| Spot 215 | 861258  | 837950  | 2134.5   | 2.5  | 20.5 | 4.4  | 0.2 | 5.3  | 0.0 | 3.0 | 0.568173  | 179.9  | 5.3  | 177.2  | 8.6  | 140.6  | 102.5 | -28.0  |
| Spot 217 | 711063  | 691821  | 1461.1   | 5.6  | 23.6 | 8.7  | 0.1 | 9.5  | 0.0 | 3.7 | 0.3928203 | 100.5  | 3.7  | 89.0   | 8.1  | NA     | NA    |        |
| Spot 218 | 5710446 | 5555911 | 106077.9 | 27.7 | 12.4 | 0.9  | 2.2 | 1.7  | 0.2 | 1.4 | 0.8468915 | 1173.0 | 15.4 | 1187.5 | 11.9 | 1214.1 | 17.8  | 3.4    |
| Spot 22  | 490074  | 476812  | 30066.0  | 1.1  | 11.1 | 2.1  | 3.1 | 3.6  | 0.2 | 3.0 | 0.8211351 | 1435.4 | 38.5 | 1434.2 | 28.0 | 1432.3 | 39.6  | -0.2   |
| Spot 221 | 288419  | 280614  | 876.6    | 2.4  | 21.1 | 9.2  | 0.3 | 10.3 | 0.0 | 4.6 | 0.4509762 | 251.9  | 11.4 | 234.7  | 21.5 | 66.5   | NA    | -278.8 |
| Spot 222 | 4407184 | 4287918 | 22464.0  | 2.1  | 18.9 | 1.0  | 0.3 | 1.6  | 0.0 | 1.2 | 0.7686923 | 283.6  | 3.4  | 287.4  | 3.9  | 318.7  | 22.9  | 11.0   |
| Spot 223 | 2379814 | 2315412 | 58690.0  | 3.6  | 9.7  | 0.9  | 4.2 | 1.7  | 0.3 | 1.4 | 0.820411  | 1649.7 | 19.7 | 1666.8 | 13.5 | 1688.5 | 17.4  | 2.3    |
| Spot 224 | 6770556 | 6587333 | 159471.7 | 1.1  | 19.2 | 0.9  | 0.3 | 1.7  | 0.0 | 1.4 | 0.8378552 | 290.5  | 4.0  | 289.7  | 4.2  | 283.4  | 20.9  | -2.5   |
| Spot 225 | 362930  | 353109  | 3818.1   | 3.7  | 13.7 | 1.8  | 1.8 | 2.6  | 0.2 | 1.9 | 0.7233    | 1054.3 | 18.1 | 1041.0 | 16.7 | 1013.2 | 36.0  | -4.1   |
| Spot 226 | 1256305 | 1222307 | 2462.8   | 2.8  | 22.5 | 2.3  | 0.2 | 3.8  | 0.0 | 3.0 | 0.7887867 | 162.0  | 4.8  | 146.8  | 5.2  | NA     | NA    |        |
| Spot 227 | 806882  | 785046  | 27982.4  | 2.6  | 20.5 | 1.9  | 0.4 | 3.2  | 0.1 | 2.5 | 0.7936519 | 361.4  | 8.8  | 333.2  | 9.0  | 140.9  | 45.3  | -156.6 |
| Spot 228 | 1469677 | 1429905 | 54746.3  | 2.3  | 12.6 | 1.1  | 2.1 | 1.6  | 0.2 | 1.2 | 0.7591505 | 1149.3 | 13.1 | 1162.5 | 11.4 | 1187.1 | 21.1  | 3.2    |
| Spot 229 | 953701  | 927892  | 24393.5  | 2.1  | 11.3 | 1.1  | 2.9 | 2.3  | 0.2 | 2.0 | 0.8659778 | 1357.2 | 23.9 | 1369.2 | 17.0 | 1388.1 | 21.7  | 2.2    |
| Spot 231 | 3169272 | 3083505 | 30421.4  | 3.1  | 10.7 | 0.7  | 3.1 | 1.2  | 0.2 | 1.0 | 0.8273956 | 1382.6 | 11.9 | 1425.5 | 8.9  | 1490.0 | 12.3  | 7.2    |
| Spot 232 | 1046553 | 1018231 | 9876.1   | 1.6  | 12.5 | 1.5  | 2.0 | 3.1  | 0.2 | 2.7 | 0.8697172 | 1081.0 | 26.9 | 1121.8 | 21.1 | 1201.7 | 30.3  | 10.0   |
| Spot 234 | 2220350 | 2160263 | 8367.4   | 1.7  | 19.7 | 1.7  | 0.3 | 2.6  | 0.0 | 2.0 | 0.7616329 | 274.4  | 5.4  | 270.1  | 6.3  | 232.9  | 39.5  | -17.8  |
| Spot 235 | 1343746 | 1307382 | 32305.3  | 1.6  | 13.7 | 1.2  | 1.8 | 2.0  | 0.2 | 1.7 | 0.8230527 | 1042.9 | 16.1 | 1035.5 | 13.2 | 1019.8 | 23.4  | -2.3   |
| Spot 236 | 906510  | 881979  | 67443.4  | 4.8  | 13.7 | 1.2  | 1.6 | 2.6  | 0.2 | 2.3 | 0.8835009 | 927.2  | 20.0 | 952.3  | 16.2 | 1010.9 | 24.9  | 8.3    |
| Spot 237 | 770764  | 749906  | 48028.4  | 1.9  | 16.0 | 3.1  | 0.7 | 3.4  | 0.1 | 1.4 | 0.4085068 | 483.0  | 6.4  | 519.6  | 13.8 | 683.9  | 66.0  | 29.4   |
| Spot 238 | 1342162 | 1305841 | 6485.8   | 2.0  | 17.1 | 1.0  | 0.7 | 2.4  | 0.1 | 2.1 | 0.9067628 | 566.1  | 11.6 | 562.5  | 10.2 | 547.8  | 21.7  | -3.3   |
| Spot 239 | 2340808 | 2277462 | 122093.4 | 1.3  | 19.3 | 1.1  | 0.3 | 1.9  | 0.0 | 1.6 | 0.8213586 | 225.6  | 3.5  | 230.2  | 4.0  | 277.7  | 25.1  | 18.8   |
| Spot 24  | 809975  | 788056  | 6800.0   | 2.8  | 13.0 | 1.2  | 2.0 | 2.3  | 0.2 | 2.0 | 0.8601445 | 1103.8 | 20.1 | 1107.6 | 15.6 | 1115.1 | 23.5  | 1.0    |
| Spot 240 | 1796428 | 1747813 | 49729.5  | 5.7  | 12.9 | 1.1  | 2.1 | 1.5  | 0.2 | 1.0 | 0.7017595 | 1133.7 | 10.8 | 1133.2 | 10.1 | 1132.0 | 20.9  | -0.1   |

|          |         |         |           |      |      |     |     |     |     |     |           |        |      |        |      |        |       |        |
|----------|---------|---------|-----------|------|------|-----|-----|-----|-----|-----|-----------|--------|------|--------|------|--------|-------|--------|
| Spot 242 | 869025  | 845508  | 9564.8    | 3.3  | 13.4 | 1.5 | 1.6 | 3.9 | 0.2 | 3.6 | 0.9248601 | 915.9  | 30.9 | 960.0  | 24.3 | 1062.5 | 29.9  | 13.8   |
| Spot 243 | 4255164 | 4140011 | 3223.2    | 3.4  | 21.6 | 3.9 | 0.1 | 4.2 | 0.0 | 1.7 | 0.4015656 | 68.1   | 1.2  | 66.5   | 2.7  | 7.1    | NA    | -855.5 |
| Spot 244 | 2256766 | 2195694 | 8046.3    | 1.2  | 20.4 | 2.1 | 0.2 | 2.4 | 0.0 | 1.2 | 0.4970963 | 180.4  | 2.1  | 178.5  | 3.9  | 152.6  | 48.9  | -18.3  |
| Spot 245 | 1358975 | 1322199 | 96226.6   | 1.6  | 11.1 | 1.3 | 2.9 | 2.2 | 0.2 | 1.7 | 0.788887  | 1362.4 | 21.1 | 1385.1 | 16.5 | 1420.2 | 25.6  | 4.1    |
| Spot 246 | 3292235 | 3203141 | 33476.0   | 1.5  | 19.1 | 1.0 | 0.3 | 1.5 | 0.0 | 1.1 | 0.7237105 | 284.7  | 3.1  | 285.9  | 3.8  | 295.2  | 23.9  | 3.5    |
| Spot 247 | 827710  | 805311  | 2334.5    | 2.4  | 19.5 | 3.7 | 0.3 | 4.1 | 0.0 | 1.6 | 0.3934404 | 266.7  | 4.2  | 264.8  | 9.5  | 247.6  | 85.9  | -7.7   |
| Spot 248 | 5817778 | 5660338 | 44417.8   | 12.3 | 13.4 | 0.8 | 1.7 | 1.4 | 0.2 | 1.2 | 0.8084245 | 1004.0 | 10.7 | 1020.6 | 9.2  | 1056.5 | 16.9  | 5.0    |
| Spot 249 | 2773153 | 2698106 | 46523.6   | 1.1  | 19.6 | 2.0 | 0.2 | 2.6 | 0.0 | 1.8 | 0.6618393 | 165.6  | 2.9  | 170.3  | 4.1  | 235.8  | 45.8  | 29.8   |
| Spot 25  | 1648423 | 1603814 | 5060.3    | 2.3  | 19.2 | 1.7 | 0.5 | 2.2 | 0.1 | 1.3 | 0.6077101 | 454.3  | 5.8  | 427.1  | 7.5  | 283.3  | 39.3  | -60.4  |
| Spot 250 | 3850031 | 3745842 | 1884.1    | 4.3  | 22.7 | 3.5 | 0.1 | 4.1 | 0.0 | 2.1 | 0.5256768 | 71.3   | 1.5  | 66.4   | 2.6  | NA     | NA    |        |
| Spot 251 | 1376149 | 1338908 | 18860.2   | 3.6  | 16.3 | 2.1 | 0.8 | 2.6 | 0.1 | 1.6 | 0.6059705 | 614.0  | 9.2  | 622.3  | 12.1 | 652.6  | 44.4  | 5.9    |
| Spot 252 | 2938220 | 2858706 | 29588.9   | 4.1  | 13.9 | 0.9 | 1.4 | 1.7 | 0.1 | 1.5 | 0.8403881 | 866.0  | 11.9 | 901.5  | 10.4 | 989.7  | 19.2  | 12.5   |
| Spot 253 | 540271  | 525650  | 2980.8    | 1.6  | 20.2 | 4.6 | 0.2 | 5.4 | 0.0 | 2.7 | 0.508702  | 200.9  | 5.4  | 198.2  | 9.7  | 165.5  | 108.6 | -21.4  |
| Spot 254 | 837738  | 815067  | 22574.4   | 2.5  | 14.3 | 1.1 | 1.5 | 1.7 | 0.2 | 1.3 | 0.7573445 | 904.1  | 11.1 | 911.9  | 10.5 | 930.8  | 23.4  | 2.9    |
| Spot 255 | 1240936 | 1207354 | 3357.3    | 0.9  | 20.3 | 1.8 | 0.3 | 2.5 | 0.0 | 1.7 | 0.6806065 | 285.6  | 4.8  | 272.4  | 6.0  | 160.1  | 42.8  | -78.5  |
| Spot 256 | 3958035 | 3850924 | 24806.7   | 1.8  | 13.9 | 0.9 | 1.5 | 1.8 | 0.2 | 1.6 | 0.8746562 | 910.6  | 13.2 | 931.3  | 10.9 | 980.9  | 17.6  | 7.2    |
| Spot 257 | 827324  | 804935  | 794.4     | 3.6  | 34.6 | 2.5 | 0.2 | 3.1 | 0.0 | 1.8 | 0.5938545 | 277.8  | 5.0  | 164.1  | 4.7  | NA     | NA    |        |
| Spot 259 | 2153472 | 2095195 | 89897.1   | 2.0  | 16.3 | 1.0 | 0.9 | 1.8 | 0.1 | 1.5 | 0.8419823 | 639.0  | 9.2  | 641.6  | 8.5  | 650.6  | 20.8  | 1.8    |
| Spot 26  | 1593989 | 1550853 | 18327.8   | 4.0  | 12.7 | 1.0 | 2.2 | 1.6 | 0.2 | 1.2 | 0.7879889 | 1206.0 | 13.5 | 1189.2 | 10.9 | 1158.9 | 19.0  | -4.1   |
| Spot 260 | 1390978 | 1353335 | 31060.7   | 1.4  | 14.3 | 1.2 | 1.5 | 1.9 | 0.2 | 1.4 | 0.7479882 | 906.4  | 11.8 | 912.5  | 11.2 | 927.6  | 25.4  | 2.3    |
| Spot 262 | 2060887 | 2005116 | 197301.9  | 3.2  | 10.7 | 0.7 | 3.4 | 1.6 | 0.3 | 1.4 | 0.8886382 | 1494.5 | 19.1 | 1497.0 | 12.6 | 1500.6 | 14.0  | 0.4    |
| Spot 263 | 1544379 | 1502585 | 19997.0   | 1.7  | 14.4 | 1.2 | 1.5 | 2.1 | 0.2 | 1.7 | 0.8275565 | 928.0  | 14.9 | 924.3  | 12.7 | 915.7  | 24.2  | -1.3   |
| Spot 265 | 1354060 | 1317417 | 7373.6    | 3.8  | 14.4 | 1.5 | 1.4 | 2.1 | 0.1 | 1.5 | 0.6940429 | 882.4  | 12.1 | 891.8  | 12.6 | 915.0  | 31.4  | 3.6    |
| Spot 266 | 3052460 | 2969855 | 22826.2   | 1.2  | 19.6 | 1.1 | 0.3 | 1.7 | 0.0 | 1.4 | 0.7895133 | 265.6  | 3.6  | 263.6  | 4.0  | 245.8  | 24.4  | -8.1   |
| Spot 267 | 1789388 | 1740964 | 21837.1   | 1.7  | 19.1 | 1.4 | 0.3 | 1.9 | 0.0 | 1.3 | 0.6764066 | 263.3  | 3.2  | 267.3  | 4.4  | 302.6  | 31.1  | 13.0   |
| Spot 268 | 2179299 | 2120323 | 16416.9   | 1.6  | 19.9 | 1.6 | 0.2 | 1.9 | 0.0 | 1.0 | 0.5530991 | 222.9  | 2.3  | 221.2  | 3.7  | 203.0  | 36.5  | -9.8   |
| Spot 269 | 1541871 | 1500145 | 6578.9    | 1.5  | 19.9 | 2.4 | 0.3 | 2.6 | 0.0 | 1.1 | 0.4158393 | 239.3  | 2.5  | 236.7  | 5.5  | 211.1  | 55.0  | -13.4  |
| Spot 27  | 791872  | 770443  | 314714.7  | 2.1  | 12.6 | 1.4 | 2.1 | 2.0 | 0.2 | 1.4 | 0.7132069 | 1144.4 | 14.9 | 1158.0 | 13.8 | 1183.6 | 27.7  | 3.3    |
| Spot 270 | 3104836 | 3020813 | 10215.5   | 9.0  | 15.5 | 1.4 | 0.6 | 2.1 | 0.1 | 1.6 | 0.7708488 | 422.2  | 6.7  | 477.4  | 8.1  | 751.8  | 28.7  | 43.8   |
| Spot 273 | 979673  | 953161  | 100649.3  | 5.3  | 11.4 | 0.9 | 2.9 | 1.4 | 0.2 | 1.1 | 0.7800432 | 1393.8 | 13.3 | 1384.9 | 10.3 | 1371.2 | 16.4  | -1.6   |
| Spot 276 | 3503171 | 3408369 | 1023942.4 | 1.1  | 20.2 | 1.4 | 0.3 | 2.9 | 0.0 | 2.5 | 0.8705269 | 276.7  | 6.8  | 265.8  | 6.7  | 170.9  | 32.9  | -62.0  |
| Spot 277 | 855133  | 831992  | 16029.5   | 3.0  | 14.5 | 0.8 | 1.5 | 2.2 | 0.2 | 2.0 | 0.92583   | 919.9  | 17.3 | 913.7  | 13.2 | 898.7  | 17.0  | -2.4   |
| Spot 278 | 357507  | 347832  | 5105.6    | 1.2  | 13.2 | 2.0 | 1.9 | 2.6 | 0.2 | 1.6 | 0.6275237 | 1085.9 | 16.1 | 1088.3 | 17.1 | 1093.0 | 39.9  | 0.6    |
| Spot 279 | 3727822 | 3626940 | 35771.2   | 9.0  | 17.2 | 0.9 | 0.6 | 1.5 | 0.1 | 1.2 | 0.805266  | 491.7  | 5.5  | 500.0  | 5.7  | 538.5  | 18.9  | 8.7    |
| Spot 28  | 4652902 | 4526986 | 102141.1  | 6.2  | 13.8 | 0.7 | 1.5 | 1.4 | 0.2 | 1.2 | 0.8604    | 928.5  | 10.0 | 949.3  | 8.3  | 998.0  | 14.0  | 7.0    |
| Spot 280 | 693259  | 674498  | 68424.9   | 5.6  | 12.4 | 1.3 | 2.3 | 2.0 | 0.2 | 1.5 | 0.7399362 | 1227.7 | 16.5 | 1220.8 | 14.2 | 1208.7 | 26.5  | -1.6   |
| Spot 281 | 988403  | 961655  | 2270.6    | 1.7  | 20.3 | 3.0 | 0.3 | 3.8 | 0.0 | 2.4 | 0.6161147 | 240.8  | 5.6  | 233.6  | 8.0  | 160.9  | 70.4  | -49.7  |
| Spot 282 | 2728588 | 2654747 | 7377.0    | 1.1  | 19.6 | 1.9 | 0.3 | 2.3 | 0.0 | 1.3 | 0.5650747 | 281.1  | 3.5  | 277.4  | 5.5  | 246.2  | 43.3  | -14.2  |
| Spot 283 | 1255338 | 1221366 | 10091.7   | 4.3  | 14.4 | 1.2 | 1.5 | 1.9 | 0.2 | 1.4 | 0.7499589 | 914.3  | 12.1 | 911.7  | 11.4 | 905.4  | 25.7  | -1.0   |
| Spot 284 | 1856400 | 1806162 | 88276.2   | 1.5  | 18.7 | 2.6 | 0.3 | 3.2 | 0.0 | 1.8 | 0.5674827 | 294.7  | 5.2  | 301.1  | 8.3  | 350.8  | 59.2  | 16.0   |
| Spot 285 | 3104099 | 3020096 | 12340.3   | 1.8  | 19.6 | 1.5 | 0.3 | 2.4 | 0.0 | 1.8 | 0.756006  | 284.1  | 4.9  | 279.7  | 5.7  | 243.5  | 35.4  | -16.7  |
| Spot 286 | 2746247 | 2671928 | 8800.7    | 3.8  | 19.5 | 1.9 | 0.3 | 2.3 | 0.0 | 1.4 | 0.6032418 | 237.2  | 3.3  | 238.4  | 5.0  | 249.4  | 43.0  | 4.9    |
| Spot 287 | 2336238 | 2273015 | 44894.7   | 1.4  | 19.7 | 2.0 | 0.3 | 4.1 | 0.0 | 3.6 | 0.8723552 | 293.5  | 10.4 | 286.6  | 10.3 | 230.8  | 46.8  | -27.2  |

|          |         |         |          |      |      |      |     |      |     |     |           |        |      |        |      |        |      |         |
|----------|---------|---------|----------|------|------|------|-----|------|-----|-----|-----------|--------|------|--------|------|--------|------|---------|
| Spot 289 | 2607069 | 2536517 | 201411.7 | 2.2  | 9.9  | 0.8  | 3.6 | 1.3  | 0.3 | 1.0 | 0.7527313 | 1492.7 | 12.7 | 1555.3 | 10.1 | 1641.3 | 15.5 | 9.1     |
| Spot 29  | 2007198 | 1952879 | 14276.6  | 1.8  | 19.5 | 1.4  | 0.3 | 2.4  | 0.0 | 2.0 | 0.811473  | 279.1  | 5.4  | 276.5  | 5.9  | 255.0  | 32.7 | -9.4    |
| Spot 291 | 967139  | 940967  | 14735.6  | 2.7  | 13.3 | 1.2  | 1.9 | 1.9  | 0.2 | 1.4 | 0.7592807 | 1071.6 | 14.1 | 1072.2 | 12.5 | 1073.4 | 24.6 | 0.2     |
| Spot 292 | 1563953 | 1521630 | 17546.6  | 3.0  | 13.6 | 1.0  | 1.8 | 1.7  | 0.2 | 1.4 | 0.8073294 | 1042.3 | 13.3 | 1037.3 | 11.1 | 1026.7 | 20.4 | -1.5    |
| Spot 293 | 484288  | 471182  | 12213.1  | 1.1  | 12.8 | 1.8  | 2.0 | 2.4  | 0.2 | 1.6 | 0.6537667 | 1094.2 | 16.0 | 1110.4 | 16.5 | 1142.2 | 36.7 | 4.2     |
| Spot 294 | 4939693 | 4806016 | 69289.0  | 1.9  | 19.7 | 1.4  | 0.3 | 2.0  | 0.0 | 1.5 | 0.7427585 | 285.6  | 4.2  | 279.8  | 5.0  | 231.6  | 31.6 | -23.3   |
| Spot 295 | 2359595 | 2295740 | 245335.6 | 2.4  | 15.2 | 2.3  | 1.0 | 4.5  | 0.1 | 3.9 | 0.8626113 | 703.5  | 26.1 | 728.3  | 23.6 | 805.4  | 48.1 | 12.7    |
| Spot 296 | 1223953 | 1190831 | 18764.0  | 5.5  | 11.6 | 1.6  | 2.8 | 1.9  | 0.2 | 1.2 | 0.5948574 | 1372.2 | 14.2 | 1357.9 | 14.5 | 1335.6 | 30.1 | -2.7    |
| Spot 297 | 911300  | 886639  | 5987.0   | 2.1  | 12.7 | 2.0  | 2.1 | 2.8  | 0.2 | 2.0 | 0.7050113 | 1140.7 | 21.0 | 1147.6 | 19.5 | 1160.6 | 40.0 | 1.7     |
| Spot 298 | 2054077 | 1998489 | 38795.6  | 3.2  | 12.8 | 0.6  | 2.1 | 1.7  | 0.2 | 1.6 | 0.9257558 | 1144.8 | 16.4 | 1148.1 | 11.6 | 1154.3 | 12.7 | 0.8     |
| Spot 299 | 2726547 | 2652762 | 4767.4   | 1.1  | 20.5 | 1.4  | 0.3 | 1.9  | 0.0 | 1.3 | 0.6968263 | 273.6  | 3.6  | 260.2  | 4.4  | 141.5  | 32.1 | -93.4   |
| Spot 3   | 1615635 | 1571913 | 15421.5  | 3.4  | 12.6 | 1.2  | 2.2 | 1.6  | 0.2 | 1.2 | 0.7063246 | 1204.2 | 12.7 | 1195.2 | 11.5 | 1178.9 | 22.8 | -2.1    |
| Spot 30  | 2259025 | 2197892 | 18971.4  | 3.7  | 12.7 | 0.8  | 2.2 | 1.7  | 0.2 | 1.5 | 0.8757086 | 1198.4 | 16.0 | 1184.7 | 11.7 | 1159.6 | 16.0 | -3.3    |
| Spot 301 | 2861065 | 2783640 | 29764.6  | 40.8 | 13.2 | 1.6  | 1.9 | 2.8  | 0.2 | 2.3 | 0.8278695 | 1095.0 | 23.4 | 1091.4 | 18.7 | 1084.1 | 31.5 | -1.0    |
| Spot 302 | 2258010 | 2196904 | 11042.4  | 1.3  | 18.7 | 2.5  | 0.3 | 2.8  | 0.0 | 1.3 | 0.4533186 | 286.2  | 3.6  | 292.6  | 7.1  | 343.5  | 56.7 | 16.7    |
| Spot 303 | 814721  | 792673  | 7997.9   | 1.5  | 18.1 | 1.9  | 0.6 | 2.9  | 0.1 | 2.1 | 0.7486512 | 462.9  | 9.5  | 455.0  | 10.5 | 415.3  | 42.3 | -11.5   |
| Spot 304 | 3384736 | 3293139 | 9611.0   | 15.1 | 12.2 | 1.7  | 0.7 | 2.6  | 0.1 | 1.9 | 0.7490169 | 392.4  | 7.4  | 544.1  | 10.9 | 1243.7 | 33.5 | 68.4    |
| Spot 305 | 1130666 | 1100069 | 20083.5  | 1.5  | 18.8 | 2.1  | 0.3 | 2.6  | 0.0 | 1.6 | 0.6081622 | 278.4  | 4.4  | 285.2  | 6.6  | 341.4  | 47.5 | 18.5    |
| Spot 306 | 3576756 | 3479963 | 18949.9  | 10.5 | 16.7 | 1.2  | 0.7 | 2.5  | 0.1 | 2.2 | 0.8866663 | 494.8  | 10.6 | 514.5  | 10.1 | 603.1  | 25.1 | 18.0    |
| Spot 308 | 537834  | 523280  | 10900.7  | 1.9  | 13.6 | 1.0  | 1.7 | 1.9  | 0.2 | 1.6 | 0.8440627 | 976.6  | 14.8 | 994.0  | 12.2 | 1032.6 | 21.0 | 5.4     |
| Spot 309 | 1992828 | 1938898 | 8002.9   | 4.0  | 19.4 | 2.3  | 0.3 | 2.8  | 0.0 | 1.7 | 0.5960558 | 285.9  | 4.7  | 283.1  | 7.0  | 260.2  | 52.1 | -9.9    |
| Spot 31  | 1338077 | 1301866 | 114110.6 | 0.6  | 11.9 | 0.8  | 2.6 | 1.6  | 0.2 | 1.4 | 0.8608486 | 1315.4 | 16.3 | 1307.1 | 11.7 | 1293.5 | 15.8 | -1.7    |
| Spot 310 | 1300950 | 1265744 | 5196.0   | 1.3  | 19.2 | 4.2  | 0.2 | 5.2  | 0.0 | 3.1 | 0.5909747 | 184.7  | 5.6  | 192.6  | 9.1  | 290.9  | 95.4 | 36.5    |
| Spot 311 | 3394472 | 3302612 | 18808.1  | 1.4  | 17.4 | 1.7  | 0.6 | 2.3  | 0.1 | 1.5 | 0.6733492 | 465.0  | 6.8  | 471.6  | 8.5  | 503.8  | 36.8 | 7.7     |
| Spot 313 | 754511  | 734092  | 3139.5   | 2.3  | 21.5 | 4.5  | 0.3 | 5.3  | 0.0 | 2.8 | 0.5225574 | 276.6  | 7.5  | 251.7  | 11.9 | 25.0   | NA   | -1007.0 |
| Spot 314 | 472335  | 459552  | 12989.2  | 3.4  | 14.6 | 1.4  | 1.4 | 2.1  | 0.2 | 1.6 | 0.7472688 | 905.7  | 13.2 | 897.3  | 12.4 | 876.5  | 28.7 | -3.3    |
| Spot 315 | 646873  | 629367  | 6656.9   | 1.6  | 12.8 | 2.2  | 2.1 | 3.0  | 0.2 | 2.0 | 0.6779505 | 1151.2 | 21.5 | 1151.3 | 20.7 | 1151.5 | 44.0 | 0.0     |
| Spot 32  | 789340  | 767979  | 20654.6  | 1.8  | 12.1 | 1.0  | 2.5 | 1.8  | 0.2 | 1.5 | 0.8374612 | 1292.7 | 17.6 | 1279.7 | 13.1 | 1257.9 | 19.2 | -2.8    |
| Spot 33  | 6855087 | 6669576 | 13277.5  | 0.8  | 21.5 | 1.8  | 0.1 | 2.7  | 0.0 | 2.0 | 0.7520436 | 56.2   | 1.1  | 55.5   | 1.4  | 27.5   | NA   | -104.4  |
| Spot 34  | 329399  | 320484  | 1046.1   | 1.5  | 20.6 | 16.0 | 0.2 | 16.3 | 0.0 | 3.2 | 0.1960289 | 177.1  | 5.6  | 173.6  | 26.0 | 126.6  | NA   | -39.9   |
| Spot 35  | 2091075 | 2034487 | 4927.5   | 1.7  | 20.3 | 3.4  | 0.2 | 5.0  | 0.0 | 3.6 | 0.7297658 | 171.5  | 6.2  | 170.8  | 7.8  | 160.9  | 79.8 | -6.6    |
| Spot 36  | 8254365 | 8030986 | 78593.3  | 26.5 | 13.9 | 0.7  | 1.4 | 1.4  | 0.1 | 1.1 | 0.8431063 | 878.5  | 9.4  | 907.5  | 8.1  | 978.6  | 14.8 | 10.2    |
| Spot 37  | 227601  | 221442  | 8704.5   | 1.7  | 16.2 | 4.2  | 0.7 | 5.9  | 0.1 | 4.2 | 0.7070747 | 508.5  | 20.5 | 537.8  | 24.8 | 664.1  | 90.0 | 23.4    |
| Spot 38  | 837979  | 815302  | 9235.0   | 2.9  | 14.5 | 2.5  | 1.5 | 4.5  | 0.2 | 3.7 | 0.8349083 | 931.8  | 32.5 | 920.7  | 27.2 | 894.2  | 51.0 | -4.2    |
| Spot 39  | 485160  | 472030  | 12673.5  | 2.5  | 12.5 | 1.9  | 2.2 | 2.4  | 0.2 | 1.5 | 0.6308697 | 1168.6 | 16.2 | 1180.6 | 16.7 | 1202.5 | 36.7 | 2.8     |
| Spot 4   | 5288345 | 5145233 | 7571.4   | 14.5 | 20.3 | 1.6  | 0.2 | 2.2  | 0.0 | 1.5 | 0.6949774 | 230.8  | 3.5  | 224.6  | 4.4  | 160.1  | 37.0 | -44.2   |
| Spot 40  | 874795  | 851121  | 22704.2  | 2.2  | 12.9 | 1.2  | 2.0 | 2.0  | 0.2 | 1.6 | 0.7863719 | 1100.9 | 15.8 | 1113.4 | 13.5 | 1137.9 | 24.4 | 3.3     |
| Spot 41  | 757945  | 737434  | 9745.4   | 2.6  | 12.3 | 2.2  | 2.2 | 2.7  | 0.2 | 1.6 | 0.5876191 | 1144.7 | 16.5 | 1174.7 | 18.7 | 1230.4 | 42.6 | 7.0     |
| Spot 42  | 814964  | 792909  | 26292.9  | 2.1  | 18.8 | 3.0  | 0.3 | 4.4  | 0.0 | 3.2 | 0.7235943 | 286.3  | 8.8  | 291.3  | 11.0 | 331.4  | 68.2 | 13.6    |
| Spot 43  | 791852  | 770423  | 34600.8  | 1.7  | 12.3 | 1.2  | 2.3 | 1.9  | 0.2 | 1.5 | 0.7733722 | 1208.0 | 16.3 | 1212.4 | 13.6 | 1220.3 | 23.9 | 1.0     |
| Spot 44  | 2429509 | 2363762 | 40829.6  | 17.1 | 19.0 | 1.8  | 0.3 | 2.5  | 0.0 | 1.7 | 0.6764602 | 257.4  | 4.2  | 262.5  | 5.7  | 309.0  | 41.3 | 16.7    |
| Spot 46  | 1119282 | 1088992 | 23056.3  | 1.6  | 17.8 | 3.4  | 0.3 | 3.7  | 0.0 | 1.5 | 0.4038843 | 253.7  | 3.7  | 274.8  | 9.0  | 458.6  | 75.7 | 44.7    |
| Spot 47  | 322450  | 313724  | 18580.7  | 1.1  | 12.5 | 2.3  | 1.9 | 4.8  | 0.2 | 4.2 | 0.8811855 | 1035.4 | 40.6 | 1090.4 | 32.2 | 1202.0 | 44.9 | 13.9    |

|         |         |         |          |      |      |     |     |     |     |     |           |        |      |        |      |        |       |        |
|---------|---------|---------|----------|------|------|-----|-----|-----|-----|-----|-----------|--------|------|--------|------|--------|-------|--------|
| Spot 48 | 502868  | 489260  | 3911.4   | 1.8  | 16.9 | 6.2 | 0.2 | 7.5 | 0.0 | 4.3 | 0.5687789 | 173.7  | 7.3  | 204.3  | 13.9 | 573.1  | 134.5 | 69.7   |
| Spot 49 | 1380922 | 1343552 | 1406.3   | 3.6  | 25.3 | 4.6 | 0.1 | 5.0 | 0.0 | 2.1 | 0.4210005 | 99.3   | 2.1  | 82.3   | 4.0  | NA     | NA    |        |
| Spot 5  | 343091  | 333807  | 8060.9   | 2.2  | 12.5 | 1.8 | 2.2 | 2.9 | 0.2 | 2.3 | 0.7946621 | 1155.0 | 24.7 | 1170.5 | 20.4 | 1199.3 | 35.2  | 3.7    |
| Spot 50 | 401161  | 390305  | 3606.4   | 1.2  | 18.0 | 5.9 | 0.2 | 7.1 | 0.0 | 3.9 | 0.5516819 | 199.4  | 7.6  | 218.4  | 13.9 | 428.7  | 131.2 | 53.5   |
| Spot 52 | 1431139 | 1392410 | 9028.7   | 2.0  | 13.8 | 1.1 | 1.7 | 1.7 | 0.2 | 1.3 | 0.7757011 | 1041.6 | 12.8 | 1026.0 | 11.1 | 993.0  | 22.0  | -4.9   |
| Spot 53 | 1252794 | 1218891 | 38862.5  | 0.9  | 8.2  | 0.8 | 6.2 | 1.3 | 0.4 | 1.0 | 0.8025975 | 2023.7 | 18.0 | 2000.1 | 11.3 | 1975.7 | 13.7  | -2.4   |
| Spot 54 | 452424  | 440180  | 2375.5   | 0.8  | 19.8 | 5.9 | 0.2 | 7.4 | 0.0 | 4.4 | 0.6005617 | 191.1  | 8.4  | 192.9  | 13.0 | 215.2  | 137.2 | 11.2   |
| Spot 55 | 796394  | 774842  | 18644.9  | 2.6  | 14.2 | 0.8 | 1.5 | 1.5 | 0.2 | 1.2 | 0.8291333 | 927.6  | 10.7 | 931.8  | 9.1  | 941.8  | 17.2  | 1.5    |
| Spot 56 | 842640  | 819837  | 8722.4   | 2.6  | 19.0 | 3.1 | 0.4 | 6.1 | 0.1 | 5.2 | 0.8578907 | 317.2  | 16.1 | 316.5  | 16.5 | 311.2  | 70.8  | -1.9   |
| Spot 57 | 1971093 | 1917751 | 3403.7   | 1.6  | 21.4 | 1.7 | 0.3 | 2.2 | 0.0 | 1.4 | 0.6316073 | 298.2  | 4.1  | 270.7  | 5.3  | 38.5   | NA    | -674.3 |
| Spot 58 | 3763833 | 3661977 | 254702.2 | 2.0  | 16.5 | 1.3 | 0.7 | 1.9 | 0.1 | 1.5 | 0.7632555 | 548.5  | 7.8  | 562.7  | 8.4  | 620.4  | 27.1  | 11.6   |
| Spot 59 | 527199  | 512932  | 10549.8  | 1.7  | 16.5 | 2.9 | 0.7 | 4.7 | 0.1 | 3.7 | 0.7857054 | 484.3  | 17.2 | 509.3  | 18.8 | 623.3  | 62.7  | 22.3   |
| Spot 6  | 2255061 | 2194035 | 25666.6  | 1.9  | 18.7 | 2.1 | 0.3 | 2.6 | 0.0 | 1.5 | 0.5610969 | 280.1  | 4.0  | 287.6  | 6.5  | 349.4  | 48.4  | 19.8   |
| Spot 61 | 1160502 | 1129097 | 2109.3   | 1.1  | 20.8 | 2.9 | 0.3 | 4.3 | 0.0 | 3.1 | 0.7258612 | 240.8  | 7.3  | 228.4  | 8.7  | 102.1  | 69.3  | -136.0 |
| Spot 62 | 3240664 | 3152966 | 840362.6 | 19.5 | 11.4 | 0.9 | 2.8 | 1.6 | 0.2 | 1.3 | 0.8434339 | 1335.0 | 16.1 | 1347.5 | 11.8 | 1367.3 | 16.4  | 2.4    |
| Spot 64 | 975425  | 949028  | 295339.5 | 2.6  | 14.5 | 1.2 | 1.4 | 3.2 | 0.1 | 2.9 | 0.9272302 | 890.1  | 24.5 | 892.0  | 18.9 | 896.4  | 24.6  | 0.7    |
| Spot 65 | 1039331 | 1011205 | 1601.3   | 1.7  | 21.9 | 3.4 | 0.3 | 3.8 | 0.0 | 1.7 | 0.4542837 | 285.9  | 4.8  | 255.3  | 8.5  | NA     | NA    |        |
| Spot 66 | 5839601 | 5681571 | 5205.7   | 1.5  | 21.4 | 1.5 | 0.2 | 2.1 | 0.0 | 1.5 | 0.7166822 | 166.4  | 2.5  | 158.2  | 3.1  | 37.0   | 35.7  | -349.6 |
| Spot 67 | 376239  | 366057  | 9128.3   | 4.7  | 12.5 | 2.1 | 1.8 | 6.1 | 0.2 | 5.7 | 0.9372974 | 1000.0 | 52.6 | 1061.2 | 39.9 | 1189.2 | 41.7  | 15.9   |
| Spot 68 | 1791288 | 1742813 | 31345.1  | 4.5  | 19.3 | 1.7 | 0.3 | 2.9 | 0.0 | 2.3 | 0.8058171 | 234.7  | 5.3  | 238.7  | 6.1  | 278.1  | 38.7  | 15.6   |
| Spot 69 | 1254587 | 1220636 | 894.9    | 2.0  | 29.0 | 4.0 | 0.1 | 5.0 | 0.0 | 3.0 | 0.6092438 | 179.4  | 5.4  | 128.0  | 6.0  | NA     | NA    |        |
| Spot 7  | 8696679 | 8461331 | 26003.2  | 1.2  | 19.1 | 1.0 | 0.3 | 1.6 | 0.0 | 1.2 | 0.7858618 | 274.6  | 3.4  | 276.8  | 3.9  | 295.3  | 22.4  | 7.0    |
| Spot 70 | 379262  | 368998  | 1508.5   | 0.8  | 22.7 | 7.8 | 0.2 | 9.0 | 0.0 | 4.6 | 0.5045958 | 180.7  | 8.1  | 162.0  | 13.5 | NA     | NA    |        |
| Spot 71 | 2418268 | 2352825 | 34810.7  | 4.8  | 19.1 | 2.5 | 0.3 | 3.0 | 0.0 | 1.8 | 0.5897311 | 246.3  | 4.3  | 250.9  | 6.8  | 294.3  | 56.1  | 16.3   |
| Spot 72 | 1225923 | 1192748 | 25066.4  | 2.2  | 12.6 | 0.9 | 2.2 | 1.7 | 0.2 | 1.4 | 0.8458924 | 1177.6 | 15.4 | 1177.1 | 11.8 | 1176.1 | 17.9  | -0.1   |
| Spot 73 | 1034916 | 1006910 | 14805.2  | 2.4  | 18.6 | 4.3 | 0.2 | 5.4 | 0.0 | 3.2 | 0.5983937 | 131.4  | 4.2  | 144.3  | 7.2  | 361.8  | 97.4  | 63.7   |
| Spot 74 | 511965  | 498110  | 2937.7   | 1.6  | 17.1 | 4.0 | 0.4 | 4.5 | 0.1 | 2.0 | 0.4428129 | 315.5  | 6.1  | 344.4  | 13.0 | 544.1  | 87.5  | 42.0   |
| Spot 75 | 2203996 | 2144352 | 19910.6  | 2.3  | 12.3 | 0.6 | 2.5 | 1.5 | 0.2 | 1.4 | 0.9243157 | 1287.1 | 16.6 | 1265.9 | 11.2 | 1230.2 | 11.5  | -4.6   |
| Spot 76 | 2401079 | 2336101 | 11877.5  | 1.8  | 18.8 | 2.7 | 0.3 | 3.1 | 0.0 | 1.4 | 0.4695961 | 243.6  | 3.4  | 252.1  | 6.8  | 332.1  | 61.4  | 26.6   |
| Spot 77 | 1824500 | 1775125 | 12266.7  | 1.2  | 17.7 | 1.5 | 0.6 | 2.2 | 0.1 | 1.6 | 0.7190488 | 475.5  | 7.2  | 474.4  | 8.3  | 469.3  | 33.8  | -1.3   |
| Spot 79 | 4058349 | 3948522 | 7473.4   | 18.3 | 20.8 | 1.4 | 0.2 | 1.9 | 0.0 | 1.4 | 0.7107685 | 237.4  | 3.2  | 225.7  | 3.9  | 105.2  | 32.1  | -125.6 |
| Spot 8  | 637877  | 620615  | 9800.7   | 2.0  | 13.5 | 2.7 | 1.6 | 3.2 | 0.2 | 1.7 | 0.5350175 | 961.2  | 15.3 | 987.9  | 20.2 | 1048.0 | 54.4  | 8.3    |
| Spot 80 | 679316  | 660932  | 1461.9   | 1.8  | 22.9 | 4.3 | 0.3 | 6.9 | 0.0 | 5.4 | 0.7819407 | 279.4  | 14.8 | 240.2  | 14.8 | NA     | NA    |        |
| Spot 82 | 1015894 | 988403  | 9145.1   | 2.0  | 14.0 | 1.3 | 1.6 | 1.8 | 0.2 | 1.3 | 0.7235543 | 944.6  | 11.6 | 954.0  | 11.3 | 975.7  | 25.7  | 3.2    |
| Spot 83 | 1202656 | 1170110 | 172626.1 | 2.4  | 12.7 | 1.0 | 2.2 | 1.8 | 0.2 | 1.4 | 0.8038437 | 1173.7 | 15.1 | 1169.0 | 12.2 | 1160.1 | 20.7  | -1.2   |
| Spot 84 | 2114144 | 2056932 | 10198.9  | 2.3  | 19.9 | 1.7 | 0.3 | 2.3 | 0.0 | 1.5 | 0.6594862 | 286.6  | 4.2  | 278.3  | 5.5  | 209.6  | 39.6  | -36.7  |
| Spot 85 | 372872  | 362781  | 3786.7   | 2.8  | 14.7 | 2.2 | 1.3 | 2.8 | 0.1 | 1.8 | 0.6409285 | 863.6  | 14.8 | 866.6  | 16.6 | 874.2  | 45.3  | 1.2    |
| Spot 86 | 816859  | 794754  | 4378.6   | 1.8  | 21.0 | 4.4 | 0.2 | 4.8 | 0.0 | 2.0 | 0.4170713 | 210.7  | 4.1  | 199.9  | 8.7  | 74.2   | NA    | -183.9 |
| Spot 88 | 2574211 | 2504548 | 205600.9 | 2.4  | 10.8 | 1.2 | 3.0 | 1.9 | 0.2 | 1.5 | 0.7896748 | 1385.9 | 18.8 | 1419.8 | 14.6 | 1470.9 | 22.2  | 5.8    |
| Spot 89 | 897447  | 873161  | 6101.6   | 1.8  | 20.2 | 2.6 | 0.3 | 3.2 | 0.0 | 1.9 | 0.6000296 | 290.1  | 5.5  | 277.7  | 7.9  | 174.9  | 60.6  | -65.8  |
| Spot 9  | 831987  | 809472  | 33834.3  | 3.5  | 12.8 | 0.9 | 2.0 | 2.4 | 0.2 | 2.3 | 0.9321492 | 1124.0 | 23.4 | 1132.1 | 16.6 | 1147.7 | 17.5  | 2.1    |
| Spot 90 | 945377  | 919793  | 22954.4  | 1.1  | 12.0 | 1.0 | 2.5 | 1.8 | 0.2 | 1.5 | 0.8441037 | 1271.3 | 17.6 | 1270.8 | 13.1 | 1269.8 | 18.9  | -0.1   |
| Spot 91 | 214830  | 209016  | 4267.8   | 1.8  | 13.3 | 1.8 | 1.9 | 2.3 | 0.2 | 1.5 | 0.6411082 | 1099.6 | 15.2 | 1090.2 | 15.7 | 1071.5 | 36.2  | -2.6   |

|                           |         |         |          |     |      |      |     |      |     |      |           |        |       |        |      |        |       |        |
|---------------------------|---------|---------|----------|-----|------|------|-----|------|-----|------|-----------|--------|-------|--------|------|--------|-------|--------|
| Spot 92                   | 702972  | 683948  | 27218.3  | 2.4 | 14.5 | 2.1  | 1.5 | 3.2  | 0.2 | 2.4  | 0.7550511 | 936.7  | 20.8  | 925.6  | 19.2 | 899.4  | 42.8  | -4.1   |
| Spot 93                   | 714930  | 695582  | 8475.2   | 1.6 | 12.4 | 1.5  | 2.2 | 2.2  | 0.2 | 1.6  | 0.7382121 | 1189.3 | 17.7  | 1196.7 | 15.5 | 1210.2 | 29.2  | 1.7    |
| Spot 95                   | 2966522 | 2886242 | 14663.4  | 5.7 | 16.6 | 2.2  | 0.5 | 2.5  | 0.1 | 1.3  | 0.5084743 | 396.1  | 4.9   | 429.4  | 8.8  | 612.3  | 46.5  | 35.3   |
| Spot 96                   | 1954626 | 1901731 | 13091.4  | 4.3 | 19.7 | 1.9  | 0.3 | 2.5  | 0.0 | 1.7  | 0.6710478 | 244.4  | 4.1   | 242.7  | 5.4  | 226.0  | 43.2  | -8.1   |
| Spot 97                   | 3491048 | 3396574 | 22606.2  | 3.9 | 13.8 | 1.5  | 1.6 | 2.4  | 0.2 | 1.9  | 0.7876913 | 970.8  | 17.4  | 980.1  | 15.4 | 1000.9 | 30.6  | 3.0    |
| Spot 98                   | 2809726 | 2733690 | 6230.7   | 1.9 | 19.3 | 2.1  | 0.3 | 2.9  | 0.0 | 2.0  | 0.6812623 | 278.3  | 5.4   | 277.9  | 7.0  | 274.4  | 48.5  | -1.4   |
| <b>Run 1 (discordant)</b> |         |         |          |     |      |      |     |      |     |      |           |        |       |        |      |        |       |        |
| Spot 106                  | 1511094 | 1470201 | 46892.0  | 2.9 | 11.9 | 1.0  | 2.8 | 1.8  | 0.2 | 1.5  | 0.8383974 | 1385.9 | 18.8  | 1352.0 | 13.5 | 1298.8 | 19.1  | -6.7   |
| Spot 107                  | 985481  | 958812  | 7042.9   | 2.2 | 14.7 | 1.3  | 1.5 | 1.8  | 0.2 | 1.2  | 0.6601156 | 936.2  | 10.2  | 916.6  | 10.7 | 869.7  | 27.7  | -7.6   |
| Spot 109                  | 1554732 | 1512658 | 96607.2  | 1.7 | 8.7  | 1.5  | 3.9 | 2.6  | 0.2 | 2.2  | 0.8225148 | 1430.0 | 27.8  | 1620.4 | 21.3 | 1877.3 | 27.0  | 23.8   |
| Spot 11                   | 2189541 | 2130288 | 11804.5  | 4.0 | 14.3 | 0.8  | 1.6 | 1.7  | 0.2 | 1.5  | 0.8780885 | 1007.5 | 14.2  | 980.1  | 10.9 | 919.4  | 17.0  | -9.6   |
| Spot 110                  | 1285921 | 1251122 | 21617.7  | 1.1 | 13.7 | 1.3  | 1.8 | 1.8  | 0.2 | 1.3  | 0.7287204 | 1078.5 | 13.4  | 1055.0 | 12.1 | 1006.6 | 25.6  | -7.1   |
| Spot 111                  | 439357  | 427467  | 126881.5 | 2.1 | 13.2 | 3.2  | 2.3 | 4.3  | 0.2 | 2.8  | 0.6525495 | 1262.1 | 31.9  | 1198.6 | 30.0 | 1086.0 | 64.8  | -16.2  |
| Spot 112                  | 432680  | 420971  | 2072.4   | 3.9 | 16.1 | 1.6  | 1.2 | 2.6  | 0.1 | 2.1  | 0.7992152 | 874.9  | 17.1  | 822.0  | 14.7 | 681.5  | 33.5  | -28.4  |
| Spot 115                  | 219672  | 213728  | 12871.4  | 2.6 | 10.7 | 3.4  | 2.5 | 4.7  | 0.2 | 3.4  | 0.7074638 | 1149.7 | 35.3  | 1273.9 | 34.4 | 1490.0 | 63.5  | 22.8   |
| Spot 117                  | 710467  | 691241  | 3252.6   | 1.2 | 18.6 | 5.0  | 0.3 | 10.6 | 0.0 | 9.3  | 0.8824936 | 220.3  | 20.2  | 232.3  | 22.0 | 355.3  | 112.4 | 38.0   |
| Spot 119                  | 109893  | 106919  | 991.2    | 3.7 | 15.8 | 5.7  | 1.4 | 7.0  | 0.2 | 4.1  | 0.5852841 | 935.1  | 35.6  | 873.4  | 41.0 | 720.2  | 120.5 | -29.8  |
| Spot 127                  | 369605  | 359603  | 7235.5   | 0.8 | 15.0 | 1.4  | 1.3 | 1.9  | 0.1 | 1.3  | 0.6702897 | 881.7  | 10.3  | 864.3  | 10.9 | 819.7  | 29.0  | -7.6   |
| Spot 14                   | 863520  | 840151  | 7160.4   | 2.9 | 10.4 | 4.0  | 2.0 | 4.3  | 0.2 | 1.5  | 0.3629806 | 912.4  | 13.2  | 1123.4 | 29.0 | 1557.9 | 74.6  | 41.4   |
| Spot 149                  | 698412  | 679512  | 14300.4  | 1.4 | 15.3 | 3.1  | 1.4 | 7.7  | 0.2 | 7.1  | 0.9154025 | 930.6  | 61.4  | 886.9  | 45.8 | 779.4  | 65.5  | -19.4  |
| Spot 151                  | 1327848 | 1291914 | 19673.0  | 3.2 | 10.9 | 4.9  | 2.2 | 9.6  | 0.2 | 8.2  | 0.8586532 | 1031.0 | 78.3  | 1178.9 | 66.8 | 1461.5 | 93.3  | 29.5   |
| Spot 152                  | 745702  | 725522  | 7174.2   | 0.7 | 23.1 | 3.8  | 0.3 | 30.2 | 0.0 | 30.0 | 0.9919806 | 266.2  | 78.2  | 227.7  | 61.8 | NA     | NA    |        |
| Spot 154                  | 598083  | 581898  | 5096.7   | 1.0 | 14.3 | 1.2  | 1.6 | 1.6  | 0.2 | 1.2  | 0.7118507 | 984.9  | 10.7  | 965.8  | 10.3 | 922.5  | 23.8  | -6.8   |
| Spot 155                  | 1352019 | 1315431 | 45356.2  | 4.3 | 13.1 | 4.1  | 2.7 | 11.3 | 0.3 | 10.6 | 0.9337758 | 1477.6 | 139.6 | 1333.6 | 84.2 | 1109.2 | 81.0  | -33.2  |
| Spot 163                  | 2265467 | 2204159 | 5629.2   | 1.3 | 23.7 | 2.4  | 0.2 | 14.3 | 0.0 | 14.0 | 0.9854819 | 198.9  | 27.5  | 169.9  | 22.3 | NA     | NA    |        |
| Spot 166                  | 1273526 | 1239062 | 37897.0  | 8.7 | 14.4 | 0.9  | 1.6 | 1.7  | 0.2 | 1.4  | 0.8570534 | 983.6  | 13.2  | 959.4  | 10.5 | 904.1  | 17.9  | -8.8   |
| Spot 171                  | 1971933 | 1918569 | 7233.6   | 1.6 | 22.5 | 2.1  | 0.3 | 17.4 | 0.0 | 17.2 | 0.9929379 | 290.5  | 49.0  | 252.8  | 38.9 | NA     | NA    |        |
| Spot 175                  | 657368  | 639578  | 593.7    | 1.8 | 29.8 | 6.7  | 0.1 | 10.8 | 0.0 | 8.5  | 0.7852573 | 193.6  | 16.1  | 133.9  | 13.5 | NA     | NA    |        |
| Spot 178                  | 308723  | 300368  | 3633.1   | 1.7 | 18.2 | 4.3  | 0.7 | 17.4 | 0.1 | 16.8 | 0.9693787 | 596.6  | 96.0  | 558.6  | 74.8 | 406.4  | 95.5  | -46.8  |
| Spot 18                   | 2189541 | 2130288 | 22092.7  | 3.4 | 12.2 | 0.9  | 2.7 | 2.2  | 0.2 | 2.0  | 0.9109932 | 1389.3 | 25.3  | 1335.9 | 16.5 | 1251.1 | 17.9  | -11.0  |
| Spot 199                  | 653044  | 635371  | 74949.2  | 3.9 | 13.5 | 4.4  | 2.1 | 8.5  | 0.2 | 7.3  | 0.8524485 | 1209.8 | 80.0  | 1151.7 | 58.7 | 1043.8 | 89.8  | -15.9  |
| Spot 2                    | 726113  | 706463  | 5049.2   | 2.4 | 14.7 | 1.3  | 1.5 | 3.0  | 0.2 | 2.7  | 0.8994381 | 930.9  | 23.1  | 911.4  | 17.8 | 864.7  | 26.8  | -7.7   |
| Spot 204                  | 166408  | 161905  | 4500.4   | 3.2 | 15.3 | 2.2  | 1.3 | 3.0  | 0.1 | 2.0  | 0.6740317 | 892.9  | 17.1  | 862.4  | 17.7 | 784.9  | 47.2  | -13.8  |
| Spot 208                  | 3013395 | 2931847 | 18699.8  | 0.3 | 11.2 | 1.7  | 2.2 | 2.6  | 0.2 | 2.0  | 0.7615086 | 1054.6 | 19.2  | 1174.3 | 18.0 | 1402.0 | 32.1  | 24.8   |
| Spot 213                  | 139229  | 135461  | 3380.8   | 2.4 | 19.1 | 7.4  | 0.2 | 12.0 | 0.0 | 9.4  | 0.7863961 | 202.2  | 18.8  | 210.0  | 22.7 | 297.8  | 169.1 | 32.1   |
| Spot 216                  | 1179056 | 1147149 | 4479.0   | 2.5 | 21.2 | 3.3  | 0.2 | 9.1  | 0.0 | 8.4  | 0.9296265 | 178.6  | 14.8  | 170.3  | 14.2 | 56.5   | NA    | -216.0 |
| Spot 219                  | 95851   | 93257   | 1352.0   | 0.3 | 15.9 | 4.9  | 1.8 | 8.3  | 0.2 | 6.7  | 0.8105993 | 1196.9 | 73.4  | 1034.9 | 53.9 | 706.8  | 103.4 | -69.3  |
| Spot 220                  | 765087  | 744382  | 894.5    | 2.6 | 53.8 | 13.5 | 0.0 | 32.9 | 0.0 | 30.0 | 0.9118153 | 120.6  | 35.9  | 47.9   | 15.4 | NA     | NA    |        |
| Spot 23                   | 228062  | 221890  | 4102.5   | 1.5 | 13.5 | 2.1  | 2.0 | 2.8  | 0.2 | 1.8  | 0.6663395 | 1131.5 | 19.2  | 1102.5 | 18.7 | 1045.5 | 41.7  | -8.2   |
| Spot 230                  | 690277  | 671597  | 25484.1  | 4.4 | 12.9 | 1.3  | 2.5 | 1.6  | 0.2 | 1.0  | 0.6019421 | 1371.0 | 12.0  | 1280.5 | 11.7 | 1131.7 | 25.6  | -21.1  |
| Spot 233                  | 3814774 | 3711539 | 20615.7  | 9.7 | 14.2 | 1.0  | 1.2 | 2.3  | 0.1 | 2.1  | 0.9085678 | 726.3  | 14.4  | 782.6  | 12.6 | 946.9  | 19.7  | 23.3   |
| Spot 241                  | 883700  | 859785  | 25402.1  | 2.7 | 12.9 | 0.9  | 2.2 | 1.8  | 0.2 | 1.5  | 0.8663161 | 1199.6 | 16.9  | 1178.9 | 12.4 | 1141.3 | 17.7  | -5.1   |
| Spot 258                  | 1010152 | 982816  | 9339.9   | 3.9 | 7.9  | 4.0  | 3.9 | 4.3  | 0.2 | 1.5  | 0.3565532 | 1292.3 | 17.9  | 1612.2 | 34.7 | 2059.5 | 70.8  | 37.3   |



|          |         |         |          |      |      |      |     |      |     |      |           |        |       |        |       |        |       |         |
|----------|---------|---------|----------|------|------|------|-----|------|-----|------|-----------|--------|-------|--------|-------|--------|-------|---------|
| Spot 261 | 693734  | 674960  | 3069.3   | 3.3  | 14.9 | 1.0  | 1.4 | 1.9  | 0.2 | 1.6  | 0.8408587 | 912.7  | 13.4  | 893.3  | 11.1  | 845.7  | 21.1  | -7.9    |
| Spot 264 | 285281  | 277561  | 3006.9   | 3.2  | 15.0 | 2.7  | 1.4 | 6.0  | 0.1 | 5.4  | 0.8973944 | 887.9  | 44.7  | 872.1  | 35.2  | 832.2  | 55.3  | -6.7    |
| Spot 271 | 1240380 | 1206813 | 9494.8   | 3.5  | 13.8 | 1.6  | 1.8 | 2.3  | 0.2 | 1.7  | 0.7267268 | 1051.9 | 16.5  | 1034.2 | 15.1  | 996.8  | 32.6  | -5.5    |
| Spot 272 | 1582631 | 1539803 | 109880.2 | 1.7  | 13.5 | 1.6  | 1.2 | 3.0  | 0.1 | 2.5  | 0.8363107 | 722.0  | 17.2  | 804.7  | 16.7  | 1040.8 | 33.3  | 30.6    |
| Spot 274 | 116778  | 113618  | 1287.0   | 2.2  | 15.2 | 3.7  | 1.4 | 4.4  | 0.2 | 2.5  | 0.5587065 | 949.4  | 21.8  | 905.3  | 26.4  | 799.3  | 76.7  | -18.8   |
| Spot 275 | 475379  | 462514  | 809.9    | 1.5  | 25.9 | 25.1 | 0.2 | 28.8 | 0.0 | 14.0 | 0.4884643 | 209.7  | 29.0  | 164.7  | 43.7  | NA     | NA    |         |
| Spot 288 | 845949  | 823056  | 8323.3   | 1.2  | 16.0 | 1.5  | 1.1 | 2.1  | 0.1 | 1.4  | 0.6868541 | 757.2  | 10.1  | 740.9  | 10.9  | 691.9  | 32.0  | -9.4    |
| Spot 290 | 2700586 | 2627503 | 7143.0   | 5.3  | 24.4 | 2.8  | 0.3 | 18.7 | 0.0 | 18.5 | 0.9886936 | 295.8  | 53.5  | 238.4  | 39.8  | NA     | NA    |         |
| Spot 300 | 325101  | 316303  | 2952.4   | 2.6  | 19.9 | 2.9  | 1.3 | 3.2  | 0.2 | 1.5  | 0.4639574 | 1104.8 | 15.2  | 844.1  | 18.5  | 208.7  | 66.2  | -429.3  |
| Spot 307 | 375755  | 365586  | 12209.8  | 3.4  | 11.1 | 7.4  | 2.6 | 30.9 | 0.2 | 30.0 | 0.9710694 | 1225.7 | 335.2 | 1299.9 | 230.4 | 1424.5 | 141.1 | 14.0    |
| Spot 312 | 480035  | 467044  | 3799.5   | 2.1  | 14.7 | 1.9  | 1.5 | 3.2  | 0.2 | 2.5  | 0.8040695 | 936.1  | 22.1  | 915.0  | 19.0  | 864.2  | 38.9  | -8.3    |
| Spot 45  | 368716  | 358738  | 2042.8   | 1.7  | 15.4 | 2.6  | 1.4 | 3.2  | 0.2 | 1.8  | 0.5733901 | 920.1  | 15.5  | 879.3  | 18.6  | 777.8  | 54.4  | -18.3   |
| Spot 51  | 877832  | 854076  | 295114.7 | 3.7  | 11.9 | 4.5  | 2.8 | 8.4  | 0.2 | 7.1  | 0.8434666 | 1411.7 | 90.2  | 1365.1 | 63.4  | 1292.8 | 88.1  | -9.2    |
| Spot 60  | 1273756 | 1239286 | 14106.6  | 6.0  | 14.1 | 1.4  | 1.7 | 2.1  | 0.2 | 1.5  | 0.7311149 | 1010.1 | 14.1  | 992.0  | 13.0  | 952.4  | 28.7  | -6.1    |
| Spot 63  | 1122475 | 1092099 | 100729.4 | 3.2  | 12.4 | 1.0  | 2.5 | 1.8  | 0.2 | 1.5  | 0.8374231 | 1296.2 | 17.5  | 1263.2 | 12.9  | 1207.3 | 19.2  | -7.4    |
| Spot 78  | 1102353 | 1072522 | 11018.5  | 4.3  | 14.3 | 1.3  | 1.6 | 1.7  | 0.2 | 1.2  | 0.6875087 | 1015.8 | 11.2  | 989.5  | 11.0  | 931.8  | 25.9  | -9.0    |
| Spot 81  | 1149376 | 1118272 | 8753.6   | 2.1  | 14.4 | 1.5  | 1.5 | 2.3  | 0.2 | 1.8  | 0.7624385 | 964.7  | 15.7  | 948.2  | 14.2  | 909.9  | 30.7  | -6.0    |
| Spot 87  | 924287  | 899274  | 18636.3  | 2.0  | 12.8 | 1.2  | 2.3 | 2.3  | 0.2 | 1.9  | 0.8410582 | 1225.3 | 21.5  | 1199.9 | 16.2  | 1154.4 | 24.7  | -6.1    |
| Spot 94  | 4384799 | 4266139 | 22142.6  | 62.8 | 21.7 | 1.8  | 0.3 | 13.6 | 0.0 | 13.5 | 0.9910982 | 260.3  | 34.5  | 235.9  | 28.7  | -0.4   | NA    | 63440.2 |
| Spot 99  | 884362  | 860430  | 6418.1   | 2.8  | 14.9 | 1.7  | 1.6 | 5.0  | 0.2 | 4.7  | 0.9440415 | 1024.6 | 45.0  | 968.0  | 31.4  | 841.7  | 34.5  | -21.7   |

**Run 2**

|         |         |         |           |      |      |     |     |     |     |     |           |        |      |        |      |        |       |       |
|---------|---------|---------|-----------|------|------|-----|-----|-----|-----|-----|-----------|--------|------|--------|------|--------|-------|-------|
| Spot 1  | 1995192 | 2054170 | 4302.7    | 1.1  | 19.0 | 2.3 | 0.2 | 3.5 | 0.0 | 1.9 | 0.5374204 | 158.0  | 2.9  | 160.3  | 5.1  | 194.9  | 67.7  | 18.9  |
| Spot 2  | 296974  | 305753  | 12815.7   | 1.8  | 12.5 | 2.7 | 2.1 | 3.5 | 0.2 | 2.2 | 0.6392367 | 1104.8 | 22.5 | 1139.4 | 23.7 | 1205.8 | 52.5  | 8.4   |
| Spot 3  | 1207231 | 1242918 | 9383.3    | 2.3  | 13.2 | 1.0 | 1.9 | 1.9 | 0.2 | 1.6 | 0.8310189 | 1082.6 | 16.1 | 1079.1 | 12.9 | 1071.9 | 21.7  | -1.0  |
| Spot 4  | 653597  | 672918  | 14220.8   | 1.3  | 13.7 | 1.5 | 1.6 | 3.0 | 0.2 | 2.5 | 0.8550675 | 934.2  | 22.1 | 958.6  | 18.4 | 1015.0 | 31.2  | 8.0   |
| Spot 5  | 294639  | 303348  | 2010.1    | 1.3  | 15.8 | 6.7 | 0.3 | 8.0 | 0.0 | 4.0 | 0.5041015 | 257.6  | 10.2 | 282.1  | 19.7 | 490.7  | 152.3 | 47.5  |
| Spot 6  | 1170704 | 1205310 | 3927.1    | 2.2  | 17.1 | 3.2 | 0.4 | 3.6 | 0.0 | 1.6 | 0.4390255 | 287.8  | 4.5  | 304.8  | 9.6  | 436.9  | 72.7  | 34.1  |
| Spot 8  | 1351591 | 1391545 | 20092.0   | 3.4  | 14.2 | 1.0 | 1.5 | 1.7 | 0.2 | 1.3 | 0.8026998 | 938.9  | 11.8 | 943.5  | 10.3 | 954.4  | 20.5  | 1.6   |
| Spot 10 | 4276434 | 4402848 | 12802.8   | 1.4  | 19.1 | 1.2 | 0.3 | 2.0 | 0.0 | 1.4 | 0.7102169 | 265.9  | 3.6  | 268.1  | 4.6  | 286.8  | 31.7  | 7.3   |
| Spot 11 | 1246128 | 1282964 | 57880.7   | 3.4  | 12.3 | 1.1 | 2.0 | 3.5 | 0.2 | 3.3 | 0.946373  | 1057.1 | 32.4 | 1123.0 | 23.9 | 1252.8 | 22.2  | 15.6  |
| Spot 12 | 1185648 | 1220696 | 18016.0   | 5.1  | 13.4 | 1.5 | 1.7 | 2.2 | 0.2 | 1.6 | 0.7125958 | 1008.8 | 14.5 | 1026.0 | 14.1 | 1062.7 | 30.7  | 5.1   |
| Spot 13 | 1815386 | 1869049 | 12368.2   | 1.3  | 19.6 | 1.2 | 0.3 | 1.9 | 0.0 | 1.4 | 0.7513856 | 279.7  | 3.8  | 273.3  | 4.5  | 219.4  | 28.4  | -27.5 |
| Spot 14 | 473547  | 487545  | 1459.7    | 1.5  | 19.2 | 2.5 | 0.3 | 3.8 | 0.0 | 2.0 | 0.5237807 | 292.4  | 5.7  | 245.0  | 8.3  | NA     | NA    |       |
| Spot 15 | 4151508 | 4274229 | 170930.2  | 1.4  | 12.8 | 0.7 | 2.2 | 1.9 | 0.2 | 1.8 | 0.9358375 | 1160.9 | 19.2 | 1168.1 | 13.4 | 1181.5 | 13.4  | 1.7   |
| Spot 16 | 3119421 | 3211633 | 1421634.5 | 4.7  | 11.6 | 0.9 | 2.7 | 2.0 | 0.2 | 1.8 | 0.9053376 | 1305.1 | 21.8 | 1329.1 | 15.1 | 1367.9 | 16.7  | 4.6   |
| Spot 17 | 5616938 | 5782977 | 47652.2   | 13.7 | 14.3 | 1.0 | 1.5 | 1.8 | 0.2 | 1.5 | 0.8447193 | 929.2  | 13.1 | 934.4  | 10.9 | 946.7  | 19.6  | 1.8   |
| Spot 18 | 438559  | 451523  | 2522.9    | 1.1  | 16.4 | 3.9 | 0.7 | 8.2 | 0.1 | 4.9 | 0.5982342 | 592.1  | 27.7 | 564.6  | 35.4 | 455.3  | 145.6 | -30.1 |
| Spot 20 | 458146  | 471689  | 56074.0   | 3.6  | 12.5 | 1.5 | 2.3 | 2.1 | 0.2 | 1.5 | 0.6999486 | 1219.3 | 16.3 | 1221.8 | 14.9 | 1226.1 | 29.4  | 0.6   |
| Spot 24 | 4112063 | 4233618 | 5609.2    | 2.3  | 19.5 | 1.0 | 0.3 | 3.1 | 0.0 | 1.4 | 0.4586195 | 238.8  | 3.3  | 232.2  | 6.4  | 166.4  | 63.6  | -43.5 |
| Spot 25 | 5363979 | 5522541 | 34118.4   | 1.6  | 19.1 | 1.2 | 0.3 | 1.9 | 0.0 | 1.5 | 0.7673663 | 274.6  | 4.0  | 278.9  | 4.7  | 315.4  | 28.0  | 12.9  |
| Spot 26 | 507996  | 523013  | 12859.5   | 1.1  | 12.3 | 1.4 | 2.3 | 2.2 | 0.2 | 1.6 | 0.7574275 | 1212.9 | 18.2 | 1217.6 | 15.4 | 1226.0 | 27.9  | 1.1   |
| Spot 28 | 1299265 | 1337671 | 11955.0   | 2.7  | 20.2 | 3.5 | 0.2 | 5.2 | 0.0 | 3.8 | 0.7358276 | 172.2  | 6.5  | 170.1  | 8.1  | 141.9  | 82.5  | -21.3 |
| Spot 30 | 691402  | 711841  | 6836.5    | 3.6  | 12.9 | 1.1 | 1.8 | 2.0 | 0.2 | 1.5 | 0.7775389 | 1037.1 | 14.8 | 1058.7 | 13.1 | 1103.6 | 25.0  | 6.0   |

|         |         |         |          |     |      |     |     |      |     |     |           |        |      |        |      |        |       |        |
|---------|---------|---------|----------|-----|------|-----|-----|------|-----|-----|-----------|--------|------|--------|------|--------|-------|--------|
| Spot 32 | 5481133 | 5643158 | 28978.7  | 5.8 | 19.4 | 1.5 | 0.3 | 2.1  | 0.0 | 1.4 | 0.6989395 | 236.2  | 3.3  | 239.7  | 4.4  | 274.1  | 33.6  | 13.8   |
| Spot 33 | 5867202 | 6040640 | 38051.7  | 0.8 | 18.9 | 0.8 | 0.3 | 2.0  | 0.0 | 1.8 | 0.901528  | 266.8  | 4.7  | 273.7  | 4.8  | 333.8  | 19.5  | 20.1   |
| Spot 34 | 1690823 | 1740805 | 2481.6   | 1.7 | 19.3 | 2.2 | 0.2 | 7.1  | 0.0 | 1.8 | 0.2595047 | 202.8  | 3.7  | 189.1  | 12.3 | 22.0   | NA    | -819.6 |
| Spot 36 | 2561837 | 2637566 | #####    | 2.0 | 10.0 | 1.0 | 3.8 | 1.9  | 0.3 | 1.7 | 0.8595423 | 1534.1 | 22.6 | 1584.9 | 15.5 | 1653.2 | 18.3  | 7.2    |
| Spot 37 | 1475460 | 1519076 | 8472.2   | 1.4 | 19.7 | 2.6 | 0.2 | 2.9  | 0.0 | 1.3 | 0.4388483 | 168.2  | 2.1  | 169.0  | 4.5  | 179.3  | 60.0  | 6.2    |
| Spot 38 | 3256587 | 3352854 | 30477.0  | 3.0 | 11.8 | 0.7 | 2.7 | 1.4  | 0.2 | 1.2 | 0.8685816 | 1318.4 | 14.0 | 1318.5 | 10.0 | 1318.7 | 13.0  | 0.0    |
| Spot 39 | 2213846 | 2279288 | 4286.4   | 1.7 | 19.0 | 1.8 | 0.3 | 2.5  | 0.0 | 1.6 | 0.6239899 | 277.9  | 4.3  | 268.5  | 6.0  | 187.1  | 46.2  | -48.6  |
| Spot 40 | 892128  | 918500  | 1885.8   | 1.0 | 16.8 | 3.5 | 0.3 | 6.6  | 0.0 | 2.4 | 0.3645802 | 280.2  | 6.6  | 283.1  | 16.3 | 306.5  | 140.4 | 8.6    |
| Spot 41 | 5411927 | 5571907 | 10244.0  | 1.4 | 19.0 | 1.4 | 0.3 | 1.9  | 0.0 | 1.2 | 0.6538225 | 260.4  | 3.1  | 261.9  | 4.3  | 275.6  | 32.6  | 5.5    |
| Spot 42 | 354161  | 364630  | 58628.9  | 2.6 | 13.4 | 2.4 | 1.6 | 3.1  | 0.2 | 2.1 | 0.6583184 | 931.6  | 17.8 | 973.7  | 19.6 | 1070.1 | 47.3  | 12.9   |
| Spot 43 | 617644  | 635901  | 24599.6  | 5.0 | 17.7 | 5.8 | 0.1 | 7.5  | 0.0 | 4.8 | 0.6344979 | 106.4  | 5.0  | 123.7  | 8.8  | 472.3  | 128.7 | 77.5   |
| Spot 44 | 9451582 | 9730976 | 34373.9  | 1.8 | 17.4 | 1.0 | 0.7 | 1.6  | 0.1 | 1.2 | 0.7796978 | 537.5  | 6.4  | 534.1  | 6.6  | 519.3  | 21.9  | -3.5   |
| Spot 45 | 1614888 | 1662625 | 11142.2  | 2.7 | 11.9 | 0.8 | 2.5 | 1.3  | 0.2 | 1.1 | 0.8019399 | 1260.4 | 12.3 | 1267.1 | 9.7  | 1278.5 | 15.6  | 1.4    |
| Spot 46 | 504539  | 519453  | 1218.0   | 0.6 | 9.9  | 7.0 | 1.0 | 7.6  | 0.1 | 2.4 | 0.3208583 | 500.3  | 11.8 | 709.4  | 39.0 | 1443.7 | 137.9 | 65.3   |
| Spot 47 | 6455215 | 6646034 | 31400.5  | 1.6 | 18.8 | 1.0 | 0.3 | 1.8  | 0.0 | 1.5 | 0.8292076 | 268.3  | 3.8  | 277.1  | 4.3  | 351.4  | 22.3  | 23.6   |
| Spot 48 | 498002  | 512723  | 9042.7   | 1.5 | 13.8 | 1.9 | 1.5 | 2.8  | 0.1 | 2.0 | 0.7136415 | 893.1  | 16.4 | 918.3  | 16.6 | 979.4  | 39.3  | 8.8    |
| Spot 49 | 836364  | 861088  | 1479.7   | 0.8 | 19.5 | 2.7 | 0.2 | 4.1  | 0.0 | 2.7 | 0.6627429 | 192.6  | 5.2  | 163.7  | 6.2  | NA     | NA    |        |
| Spot 50 | 657459  | 676894  | 3335.9   | 2.9 | 14.0 | 1.2 | 1.3 | 2.2  | 0.1 | 1.9 | 0.8411322 | 849.3  | 14.9 | 853.7  | 12.8 | 865.2  | 24.9  | 1.8    |
| Spot 51 | 1219171 | 1255211 | 949.5    | 2.3 | 21.3 | 3.5 | 0.0 | 20.0 | 0.0 | 2.7 | 0.1361254 | 68.4   | 1.9  | 45.9   | 9.0  | NA     | NA    |        |
| Spot 52 | 1106989 | 1139712 | 2877.5   | 4.6 | 17.9 | 2.3 | 0.3 | 4.1  | 0.0 | 1.9 | 0.4606037 | 269.5  | 4.9  | 267.9  | 9.6  | 254.1  | 83.0  | -6.1   |
| Spot 53 | 6052915 | 6231842 | 14741.1  | 1.5 | 19.3 | 1.2 | 0.3 | 1.9  | 0.0 | 1.3 | 0.6935802 | 270.5  | 3.4  | 268.8  | 4.4  | 254.6  | 31.0  | -6.2   |
| Spot 54 | 810034  | 833979  | 5258.5   | 2.1 | 13.5 | 2.3 | 1.5 | 2.6  | 0.2 | 1.3 | 0.4780145 | 919.8  | 10.8 | 942.1  | 16.2 | 994.6  | 47.0  | 7.5    |
| Spot 57 | 1023575 | 1053833 | 143426.6 | 2.8 | 13.6 | 1.3 | 1.6 | 2.1  | 0.2 | 1.7 | 0.8021813 | 942.3  | 15.1 | 972.8  | 13.4 | 1042.2 | 25.8  | 9.6    |
| Spot 58 | 1271007 | 1308579 | 5277.4   | 1.4 | 19.3 | 2.0 | 0.3 | 2.8  | 0.0 | 2.0 | 0.6945225 | 283.5  | 5.5  | 271.8  | 6.8  | 171.6  | 47.7  | -65.2  |
| Spot 59 | 446808  | 460016  | 9026.6   | 1.4 | 13.4 | 2.3 | 1.7 | 3.1  | 0.2 | 2.0 | 0.6538877 | 969.7  | 18.0 | 990.3  | 19.3 | 1036.0 | 46.7  | 6.4    |
| Spot 60 | 633801  | 652536  | 6981.9   | 4.1 | 13.5 | 1.2 | 1.7 | 2.4  | 0.2 | 1.6 | 0.6636808 | 1004.0 | 14.7 | 1005.5 | 15.2 | 1008.7 | 36.2  | 0.5    |
| Spot 61 | 3869872 | 3984267 | 13754.9  | 1.2 | 19.2 | 1.0 | 0.3 | 1.8  | 0.0 | 1.4 | 0.7829439 | 265.2  | 3.6  | 265.5  | 4.1  | 268.2  | 25.3  | 1.1    |
| Spot 63 | 1820484 | 1874299 | 7906.9   | 1.2 | 19.3 | 1.2 | 0.3 | 2.0  | 0.0 | 1.6 | 0.7961997 | 279.0  | 4.4  | 272.6  | 4.8  | 218.1  | 28.3  | -27.9  |
| Spot 64 | 2497497 | 2571324 | 18997.5  | 1.3 | 19.4 | 1.3 | 0.3 | 1.9  | 0.0 | 1.3 | 0.7238584 | 285.8  | 3.8  | 282.4  | 4.6  | 254.3  | 29.5  | -12.4  |
| Spot 66 | 895905  | 922388  | 21427.6  | 2.5 | 13.5 | 1.3 | 1.8 | 1.8  | 0.2 | 1.2 | 0.684324  | 1060.2 | 11.9 | 1055.5 | 11.6 | 1045.7 | 26.1  | -1.4   |
| Spot 67 | 900629  | 927252  | 4651.8   | 1.2 | 18.6 | 3.0 | 0.3 | 3.9  | 0.0 | 1.4 | 0.3661478 | 273.5  | 3.8  | 271.8  | 9.2  | 256.8  | 82.8  | -6.5   |
| Spot 68 | 967976  | 996589  | 5571.9   | 1.9 | 16.9 | 3.6 | 0.3 | 4.3  | 0.0 | 2.3 | 0.5349891 | 264.2  | 6.0  | 290.5  | 10.9 | 507.7  | 80.2  | 48.0   |
| Spot 69 | 3326320 | 3424648 | 11028.6  | 1.5 | 19.9 | 1.4 | 0.3 | 2.4  | 0.0 | 1.9 | 0.7790039 | 272.7  | 4.9  | 262.9  | 5.5  | 176.4  | 34.8  | -54.6  |
| Spot 70 | 664657  | 684305  | 22664.7  | 2.9 | 17.8 | 4.4 | 0.4 | 5.2  | 0.0 | 2.8 | 0.5396684 | 312.5  | 8.5  | 330.8  | 14.6 | 462.1  | 96.5  | 32.4   |
| Spot 71 | 995539  | 1024968 | 18655.4  | 2.7 | 12.4 | 1.0 | 2.3 | 1.8  | 0.2 | 1.4 | 0.8175347 | 1216.4 | 16.1 | 1218.4 | 12.6 | 1222.0 | 20.0  | 0.5    |
| Spot 72 | 2595924 | 2672661 | 5853.4   | 3.1 | 19.0 | 1.5 | 0.3 | 2.5  | 0.0 | 1.8 | 0.7394258 | 233.5  | 4.2  | 233.8  | 5.2  | 237.4  | 38.7  | 1.6    |
| Spot 73 | 512693  | 527848  | 1705.6   | 1.1 | 18.9 | 4.5 | 0.2 | 6.6  | 0.0 | 4.8 | 0.7264974 | 186.4  | 8.8  | 169.6  | 10.3 | NA     | NA    |        |
| Spot 74 | 1543239 | 1588858 | 28526.3  | 3.0 | 12.6 | 1.1 | 2.2 | 1.9  | 0.2 | 1.5 | 0.8082002 | 1164.0 | 16.4 | 1176.5 | 13.3 | 1199.7 | 22.1  | 3.0    |
| Spot 75 | 2874917 | 2959901 | 19705.9  | 9.8 | 18.3 | 1.6 | 0.3 | 2.5  | 0.0 | 1.9 | 0.7738739 | 232.3  | 4.4  | 247.3  | 5.5  | 391.8  | 35.8  | 40.7   |
| Spot 77 | 2718545 | 2798907 | 4669.8   | 1.9 | 20.3 | 2.3 | 0.2 | 4.0  | 0.0 | 2.4 | 0.5887745 | 149.0  | 3.5  | 142.3  | 5.4  | 32.1   | NA    | -364.2 |
| Spot 78 | 797394  | 820966  | 1091.8   | 0.7 | 17.9 | 4.7 | 0.2 | 6.5  | 0.0 | 4.3 | 0.6672596 | 197.8  | 8.4  | 172.1  | 10.2 | NA     | NA    |        |
| Spot 79 | 3272897 | 3369645 | 17674.6  | 2.5 | 18.9 | 2.4 | 0.4 | 6.3  | 0.0 | 5.8 | 0.9235056 | 309.7  | 17.7 | 311.0  | 17.0 | 320.6  | 55.2  | 3.4    |
| Spot 80 | 1505978 | 1550496 | 2509.3   | 2.8 | 18.3 | 3.2 | 0.2 | 7.7  | 0.0 | 6.0 | 0.7801915 | 165.6  | 9.8  | 166.2  | 11.7 | 173.8  | 111.8 | 4.7    |

|          |         |         |          |      |      |     |     |      |     |     |           |        |      |        |      |        |       |        |
|----------|---------|---------|----------|------|------|-----|-----|------|-----|-----|-----------|--------|------|--------|------|--------|-------|--------|
| Spot 81  | 771356  | 794158  | 33624.6  | 1.0  | 18.1 | 4.3 | 0.2 | 4.6  | 0.0 | 1.4 | 0.3088289 | 190.3  | 2.6  | 210.0  | 8.6  | 437.6  | 96.4  | 56.5   |
| Spot 82  | 531104  | 546803  | 1097.3   | 1.3  | 18.2 | 4.7 | 0.2 | 10.1 | 0.0 | 3.4 | 0.3397036 | 189.6  | 6.4  | 161.6  | 15.0 | NA     | NA    |        |
| Spot 83  | 1873556 | 1928939 | 100709.1 | 2.5  | 12.1 | 1.0 | 2.4 | 1.8  | 0.2 | 1.5 | 0.8168184 | 1223.2 | 16.3 | 1246.1 | 12.9 | 1285.8 | 20.2  | 4.9    |
| Spot 84  | 972754  | 1001509 | 3671.7   | 1.3  | 18.0 | 3.9 | 0.3 | 4.4  | 0.0 | 2.0 | 0.4464565 | 279.4  | 5.3  | 282.1  | 10.8 | 304.5  | 89.1  | 8.2    |
| Spot 85  | 478885  | 493041  | 13671.9  | 3.0  | 14.0 | 1.7 | 1.6 | 2.6  | 0.2 | 1.9 | 0.7320824 | 977.3  | 17.0 | 976.6  | 16.0 | 974.9  | 35.5  | -0.2   |
| Spot 86  | 1607060 | 1654565 | 40235.4  | 2.9  | 12.4 | 0.9 | 2.4 | 1.8  | 0.2 | 1.6 | 0.8652743 | 1220.8 | 17.3 | 1228.0 | 12.8 | 1240.8 | 17.6  | 1.6    |
| Spot 87  | 1328081 | 1367340 | 12994.8  | 1.8  | 19.6 | 1.7 | 0.3 | 2.6  | 0.0 | 2.0 | 0.7552924 | 286.1  | 5.5  | 280.1  | 6.4  | 230.3  | 39.6  | -24.2  |
| Spot 88  | 2194515 | 2259386 | 9287.2   | 1.7  | 18.7 | 2.3 | 0.3 | 2.7  | 0.0 | 1.3 | 0.4721798 | 280.4  | 3.5  | 284.4  | 6.7  | 316.9  | 54.1  | 11.5   |
| Spot 89  | 1239274 | 1275908 | 37167.4  | 1.6  | 9.7  | 0.9 | 4.1 | 1.8  | 0.3 | 1.6 | 0.8677846 | 1619.6 | 22.7 | 1658.6 | 14.9 | 1708.4 | 16.7  | 5.2    |
| Spot 90  | 663592  | 683208  | 5232.9   | 3.2  | 13.6 | 1.0 | 1.5 | 2.0  | 0.2 | 1.6 | 0.8057143 | 921.8  | 14.1 | 940.4  | 12.5 | 984.3  | 24.6  | 6.4    |
| Spot 91  | 632643  | 651345  | 26822.3  | 0.7  | 11.8 | 1.0 | 2.7 | 2.3  | 0.2 | 2.0 | 0.8866367 | 1348.5 | 24.6 | 1341.1 | 17.0 | 1329.3 | 20.4  | -1.4   |
| Spot 92  | 981673  | 1010692 | 24748.9  | 0.9  | 12.9 | 1.0 | 2.2 | 1.5  | 0.2 | 1.2 | 0.7738979 | 1195.1 | 12.9 | 1179.9 | 10.7 | 1152.0 | 19.2  | -3.7   |
| Spot 93  | 2348080 | 2417490 | 7265.5   | 1.8  | 19.0 | 2.1 | 0.3 | 2.6  | 0.0 | 1.4 | 0.5337096 | 270.5  | 3.7  | 270.3  | 6.2  | 268.5  | 50.6  | -0.7   |
| Spot 94  | 573313  | 590260  | 10562.4  | 3.2  | 14.4 | 1.5 | 1.5 | 2.9  | 0.2 | 2.4 | 0.8288927 | 934.5  | 20.8 | 927.9  | 17.6 | 912.2  | 33.3  | -2.4   |
| Spot 96  | 2630734 | 2708500 | 7301.9   | 1.5  | 19.0 | 1.2 | 0.3 | 2.7  | 0.0 | 1.8 | 0.640422  | 267.4  | 4.6  | 267.0  | 6.4  | 264.0  | 48.2  | -1.3   |
| Spot 97  | 8225608 | 8468761 | 3953.1   | 8.0  | 20.0 | 3.3 | 0.1 | 6.0  | 0.0 | 3.0 | 0.5085451 | 70.6   | 2.1  | 70.1   | 4.0  | 54.7   | NA    | -29.1  |
| Spot 98  | 1919817 | 1976568 | 5008.9   | 1.9  | 18.9 | 2.0 | 0.3 | 3.5  | 0.0 | 1.9 | 0.5320433 | 266.7  | 4.9  | 263.6  | 8.1  | 236.7  | 68.4  | -12.7  |
| Spot 99  | 522744  | 538196  | 20139.2  | 2.6  | 14.1 | 1.3 | 1.5 | 2.1  | 0.2 | 1.7 | 0.8025981 | 919.0  | 14.6 | 933.3  | 13.0 | 967.3  | 25.9  | 5.0    |
| Spot 102 | 177104  | 182340  | 1622.4   | 2.0  | 12.7 | 3.1 | 1.5 | 5.6  | 0.2 | 2.4 | 0.4358757 | 917.2  | 20.9 | 927.5  | 34.1 | 952.2  | 103.3 | 3.7    |
| Spot 103 | 1509241 | 1553855 | 6914.6   | 7.2  | 17.5 | 2.3 | 0.7 | 3.5  | 0.1 | 2.6 | 0.7437338 | 539.8  | 13.4 | 523.2  | 14.2 | 451.2  | 51.7  | -19.7  |
| Spot 105 | 716247  | 737420  | 3815.6   | 1.0  | 16.4 | 1.5 | 0.8 | 2.1  | 0.1 | 1.4 | 0.6589232 | 623.6  | 8.2  | 604.4  | 9.5  | 532.9  | 34.3  | -17.0  |
| Spot 106 | 439642  | 452638  | 25135.2  | 3.1  | 13.9 | 1.0 | 1.5 | 1.4  | 0.1 | 1.0 | 0.7038354 | 889.9  | 8.5  | 923.4  | 8.8  | 1004.3 | 20.9  | 11.4   |
| Spot 108 | 1620001 | 1667889 | 176116.9 | 2.7  | 11.8 | 0.9 | 2.5 | 1.6  | 0.2 | 1.3 | 0.8258402 | 1226.3 | 14.7 | 1267.5 | 11.5 | 1338.1 | 17.3  | 8.4    |
| Spot 111 | 374451  | 385520  | 22444.2  | 3.7  | 12.8 | 1.9 | 2.0 | 2.4  | 0.2 | 1.4 | 0.5942042 | 1081.9 | 14.0 | 1112.1 | 16.0 | 1171.8 | 37.6  | 7.7    |
| Spot 112 | 407996  | 420057  | 7288.8   | 0.8  | 8.8  | 1.3 | 5.0 | 1.9  | 0.3 | 1.3 | 0.7070142 | 1768.0 | 20.7 | 1811.6 | 16.0 | 1862.1 | 24.1  | 5.1    |
| Spot 113 | 382048  | 393341  | 11915.7  | 1.5  | 12.6 | 1.3 | 1.9 | 2.2  | 0.2 | 1.7 | 0.8064821 | 1015.8 | 16.4 | 1070.9 | 14.3 | 1185.0 | 25.3  | 14.3   |
| Spot 114 | 808171  | 832061  | 1222.9   | 2.3  | 20.7 | 4.0 | 0.1 | 10.3 | 0.0 | 4.1 | 0.3952724 | 128.3  | 5.2  | 98.5   | 9.7  | NA     | NA    |        |
| Spot 115 | 1880205 | 1935785 | 19879.5  | 0.9  | 19.1 | 2.7 | 0.3 | 4.3  | 0.0 | 3.3 | 0.7661873 | 270.7  | 8.6  | 274.5  | 10.2 | 307.0  | 62.3  | 11.8   |
| Spot 116 | 573057  | 589997  | 15544.1  | 3.3  | 7.6  | 0.9 | 7.1 | 2.4  | 0.4 | 2.3 | 0.9347099 | 2109.9 | 40.7 | 2127.2 | 21.6 | 2144.0 | 15.0  | 1.6    |
| Spot 117 | 2391798 | 2462501 | 9356.5   | 2.4  | 19.7 | 1.9 | 0.3 | 2.5  | 0.0 | 1.3 | 0.5337747 | 248.8  | 3.3  | 243.1  | 5.5  | 188.9  | 49.8  | -31.7  |
| Spot 118 | 6416451 | 6606124 | 69052.4  | 55.7 | 16.2 | 1.2 | 0.8 | 2.4  | 0.1 | 2.1 | 0.8588357 | 602.1  | 11.9 | 622.1  | 11.2 | 695.4  | 26.3  | 13.4   |
| Spot 119 | 2671210 | 2750173 | 10217.6  | 2.2  | 19.8 | 1.3 | 0.2 | 1.8  | 0.0 | 1.2 | 0.6734657 | 192.2  | 2.3  | 192.0  | 3.2  | 189.3  | 31.6  | -1.5   |
| Spot 122 | 5854158 | 6027210 | 91661.1  | 31.8 | 14.3 | 0.8 | 1.4 | 1.6  | 0.1 | 1.4 | 0.8728879 | 885.0  | 11.8 | 904.3  | 9.8  | 951.6  | 16.3  | 7.0    |
| Spot 123 | 1272439 | 1310052 | 28096.9  | 0.7  | 11.4 | 1.2 | 3.1 | 2.0  | 0.2 | 1.6 | 0.7915799 | 1436.0 | 20.3 | 1423.2 | 15.2 | 1404.2 | 23.3  | -2.3   |
| Spot 126 | 2015730 | 2075316 | 4885.5   | 6.4  | 16.8 | 1.4 | 0.6 | 2.4  | 0.1 | 1.8 | 0.7386692 | 433.5  | 7.4  | 446.6  | 8.7  | 514.5  | 35.6  | 15.7   |
| Spot 127 | 2247746 | 2314190 | 23862.6  | 3.3  | 14.2 | 1.1 | 1.6 | 1.8  | 0.2 | 1.4 | 0.789033  | 970.9  | 13.0 | 969.8  | 11.4 | 967.1  | 23.0  | -0.4   |
| Spot 128 | 2054439 | 2115170 | 16669.1  | 1.1  | 19.0 | 1.4 | 0.3 | 2.2  | 0.0 | 1.6 | 0.7605683 | 286.2  | 4.6  | 290.1  | 5.5  | 321.4  | 31.9  | 10.9   |
| Spot 130 | 3153797 | 3247024 | 6237.8   | 1.1  | 30.0 | 1.0 | 0.3 | 1.4  | 0.1 | 0.9 | 0.638034  | 451.9  | 3.8  | 279.0  | 3.3  | NA     | NA    |        |
| Spot 132 | 868476  | 894149  | 1476.0   | 1.5  | 18.5 | 3.9 | 0.2 | 8.8  | 0.0 | 2.6 | 0.2984645 | 191.8  | 5.0  | 173.8  | 14.0 | NA     | NA    |        |
| Spot 133 | 1335872 | 1375361 | 41772.3  | 2.5  | 12.9 | 0.9 | 2.1 | 1.6  | 0.2 | 1.3 | 0.8143769 | 1151.1 | 13.7 | 1155.8 | 11.0 | 1164.7 | 18.4  | 1.2    |
| Spot 134 | 2356700 | 2426366 | 31842.2  | 2.5  | 21.3 | 0.9 | 0.3 | 1.5  | 0.1 | 1.2 | 0.7873474 | 321.8  | 3.8  | 292.7  | 3.9  | 66.8   | 22.4  | -381.7 |
| Spot 135 | 1132479 | 1165956 | 56786.5  | 1.6  | 19.3 | 2.6 | 0.3 | 3.6  | 0.0 | 2.6 | 0.7033123 | 287.3  | 7.2  | 289.5  | 9.1  | 308.0  | 58.8  | 6.7    |
| Spot 137 | 903485  | 930192  | 1505.1   | 1.2  | 17.9 | 4.4 | 0.2 | 5.9  | 0.0 | 3.7 | 0.6284116 | 177.4  | 6.5  | 168.7  | 9.2  | 48.8   | NA    | -263.9 |

|          |         |         |          |     |      |     |     |      |     |     |           |        |      |        |      |        |       |       |
|----------|---------|---------|----------|-----|------|-----|-----|------|-----|-----|-----------|--------|------|--------|------|--------|-------|-------|
| Spot 138 | 3526326 | 3630566 | 37555.8  | 1.6 | 19.4 | 1.0 | 0.3 | 1.7  | 0.0 | 1.4 | 0.8293974 | 282.7  | 4.0  | 283.7  | 4.3  | 291.7  | 22.1  | 3.1   |
| Spot 139 | 648806  | 667985  | 60955.4  | 1.9 | 13.9 | 1.6 | 1.6 | 2.1  | 0.2 | 1.4 | 0.6749114 | 924.1  | 12.3 | 951.7  | 13.0 | 1016.1 | 31.6  | 9.1   |
| Spot 140 | 2878472 | 2963562 | 32062.4  | 5.7 | 12.5 | 0.9 | 2.3 | 2.1  | 0.2 | 1.9 | 0.9055783 | 1188.5 | 21.0 | 1206.2 | 15.1 | 1238.1 | 17.8  | 4.0   |
| Spot 141 | 2390565 | 2461231 | 428111.5 | 8.7 | 12.4 | 0.7 | 2.4 | 2.0  | 0.2 | 1.9 | 0.9339037 | 1227.2 | 20.7 | 1240.3 | 14.2 | 1263.2 | 13.9  | 2.9   |
| Spot 142 | 2141372 | 2204672 | 4150.2   | 1.6 | 18.9 | 2.6 | 0.3 | 3.3  | 0.0 | 2.0 | 0.6143159 | 279.2  | 5.6  | 272.8  | 8.0  | 217.6  | 60.8  | -28.3 |
| Spot 143 | 505487  | 520430  | 3816.5   | 2.6 | 13.9 | 1.8 | 1.4 | 3.0  | 0.1 | 1.3 | 0.446409  | 880.7  | 10.8 | 891.5  | 17.5 | 918.5  | 54.3  | 4.1   |
| Spot 144 | 569451  | 586285  | 55089.6  | 4.0 | 12.2 | 1.0 | 2.4 | 1.7  | 0.2 | 1.3 | 0.7971413 | 1208.1 | 14.8 | 1232.0 | 12.0 | 1274.0 | 19.8  | 5.2   |
| Spot 145 | 442008  | 455074  | 8282.9   | 2.7 | 11.6 | 1.4 | 2.5 | 1.9  | 0.2 | 1.2 | 0.6343836 | 1242.7 | 13.3 | 1278.3 | 13.5 | 1338.7 | 27.7  | 7.2   |
| Spot 146 | 677473  | 697500  | 4064.4   | 2.6 | 16.1 | 4.3 | 0.4 | 4.9  | 0.0 | 2.2 | 0.4484796 | 269.0  | 5.8  | 305.0  | 12.9 | 590.7  | 94.8  | 54.5  |
| Spot 148 | 804802  | 828592  | 37476.9  | 1.9 | 14.0 | 1.2 | 1.5 | 3.1  | 0.1 | 2.8 | 0.9134558 | 896.8  | 23.4 | 926.7  | 18.6 | 998.4  | 25.3  | 10.2  |
| Spot 149 | 2309479 | 2377749 | 38422.9  | 1.7 | 19.7 | 1.9 | 0.2 | 2.5  | 0.0 | 1.6 | 0.6388027 | 163.6  | 2.6  | 170.5  | 3.9  | 267.5  | 44.0  | 38.8  |
| Spot 151 | 328589  | 338302  | 4833.6   | 1.4 | 16.2 | 5.2 | 0.3 | 5.9  | 0.0 | 2.4 | 0.4012318 | 208.6  | 4.9  | 244.8  | 12.9 | 607.6  | 117.2 | 65.7  |
| Spot 152 | 1268163 | 1305650 | 2910.5   | 3.4 | 18.6 | 4.0 | 0.1 | 4.9  | 0.0 | 2.4 | 0.4834846 | 69.8   | 1.7  | 72.9   | 3.5  | 178.9  | 100.8 | 61.0  |
| Spot 153 | 1834465 | 1888693 | 90910.1  | 2.6 | 12.6 | 1.1 | 2.1 | 1.8  | 0.2 | 1.4 | 0.7876225 | 1105.4 | 14.4 | 1142.8 | 12.3 | 1214.3 | 21.8  | 9.0   |
| Spot 154 | 708284  | 729221  | 3883.2   | 1.1 | 19.1 | 3.0 | 0.2 | 5.8  | 0.0 | 3.1 | 0.5390475 | 183.1  | 5.7  | 182.6  | 9.8  | 175.2  | 114.9 | -4.5  |
| Spot 155 | 3347586 | 3446543 | 16200.0  | 1.1 | 18.0 | 2.3 | 0.3 | 2.5  | 0.0 | 1.0 | 0.3902976 | 281.8  | 2.7  | 299.6  | 6.6  | 440.8  | 51.9  | 36.1  |
| Spot 156 | 1949119 | 2006736 | 36252.8  | 4.6 | 12.8 | 1.7 | 2.2 | 3.0  | 0.2 | 2.4 | 0.8113649 | 1203.7 | 26.3 | 1196.6 | 20.7 | 1183.7 | 34.1  | -1.7  |
| Spot 157 | 4251100 | 4376764 | 176158.3 | 3.7 | 12.6 | 1.2 | 2.4 | 2.0  | 0.2 | 1.6 | 0.7998865 | 1242.5 | 17.9 | 1234.4 | 14.1 | 1220.4 | 23.3  | -1.8  |
| Spot 158 | 434601  | 447448  | 1385.5   | 1.2 | 18.0 | 4.8 | 0.2 | 12.9 | 0.0 | 3.8 | 0.2952726 | 194.4  | 7.3  | 180.1  | 21.3 | NA     | NA    |       |
| Spot 159 | 2769495 | 2851362 | 46894.2  | 2.1 | 19.5 | 1.1 | 0.3 | 2.1  | 0.0 | 1.8 | 0.8483048 | 292.6  | 5.2  | 292.0  | 5.4  | 287.2  | 25.9  | -1.9  |
| Spot 160 | 782520  | 805652  | 1758.5   | 2.0 | 17.6 | 4.5 | 0.2 | 5.5  | 0.0 | 3.0 | 0.5488594 | 193.3  | 5.7  | 192.3  | 9.6  | 179.9  | 106.6 | -7.5  |
| Spot 161 | 850603  | 875747  | 3231.8   | 0.9 | 20.4 | 2.7 | 0.2 | 6.0  | 0.0 | 2.5 | 0.4128344 | 191.9  | 4.7  | 176.5  | 9.8  | NA     | NA    |       |
| Spot 162 | 1165265 | 1199710 | 32461.1  | 1.9 | 11.7 | 0.9 | 2.9 | 1.7  | 0.2 | 1.4 | 0.8313715 | 1400.9 | 18.0 | 1384.6 | 13.0 | 1359.6 | 18.4  | -3.0  |
| Spot 164 | 900136  | 926744  | 4071.3   | 2.1 | 12.7 | 1.3 | 2.0 | 1.8  | 0.2 | 1.3 | 0.705382  | 1103.7 | 13.0 | 1109.6 | 12.3 | 1121.3 | 25.8  | 1.6   |
| Spot 165 | 2489911 | 2563514 | 191099.7 | 3.0 | 11.7 | 1.0 | 2.6 | 1.9  | 0.2 | 1.5 | 0.8333998 | 1277.1 | 17.9 | 1310.5 | 13.6 | 1365.5 | 19.7  | 6.5   |
| Spot 166 | 1377499 | 1418219 | 39094.4  | 1.2 | 10.6 | 1.2 | 3.4 | 2.1  | 0.3 | 1.7 | 0.8096587 | 1465.6 | 22.3 | 1499.6 | 16.5 | 1547.9 | 23.2  | 5.3   |
| Spot 167 | 1619125 | 1666988 | 32598.0  | 1.4 | 12.7 | 1.1 | 2.2 | 1.8  | 0.2 | 1.4 | 0.7828579 | 1185.6 | 15.3 | 1188.7 | 12.7 | 1194.2 | 22.2  | 0.7   |
| Spot 168 | 2807344 | 2890331 | 7114.5   | 1.2 | 18.9 | 1.5 | 0.3 | 2.2  | 0.0 | 1.4 | 0.6398426 | 272.9  | 3.7  | 272.5  | 5.2  | 269.2  | 38.5  | -1.4  |
| Spot 169 | 678191  | 698239  | 19832.2  | 3.0 | 14.4 | 1.5 | 1.5 | 2.3  | 0.2 | 1.6 | 0.7214924 | 952.1  | 14.4 | 945.4  | 13.9 | 929.9  | 32.2  | -2.4  |
| Spot 170 | 991673  | 1020987 | 3907.5   | 1.6 | 18.9 | 1.7 | 0.3 | 2.5  | 0.0 | 1.6 | 0.6419937 | 279.7  | 4.5  | 271.2  | 6.1  | 198.4  | 45.4  | -41.0 |
| Spot 172 | 483335  | 497622  | 31418.9  | 3.1 | 14.2 | 2.3 | 1.6 | 4.1  | 0.2 | 3.3 | 0.815507  | 955.9  | 29.4 | 956.7  | 25.1 | 958.3  | 48.0  | 0.3   |
| Spot 174 | 1132911 | 1166401 | 8062.9   | 6.8 | 13.7 | 1.0 | 1.6 | 1.8  | 0.2 | 1.3 | 0.7118026 | 981.6  | 11.6 | 989.0  | 11.3 | 1005.3 | 25.5  | 2.4   |
| Spot 175 | 1758522 | 1810505 | 3572.9   | 0.9 | 19.5 | 2.4 | 0.2 | 4.5  | 0.0 | 1.8 | 0.3892866 | 178.1  | 3.1  | 173.0  | 7.2  | 103.7  | 98.6  | -71.7 |
| Spot 176 | 861534  | 887001  | 57776.9  | 0.8 | 12.7 | 0.8 | 2.1 | 1.5  | 0.2 | 1.3 | 0.8487068 | 1137.2 | 13.1 | 1158.2 | 10.2 | 1197.6 | 15.5  | 5.0   |
| Spot 177 | 1941032 | 1998410 | 14983.5  | 1.8 | 20.3 | 2.3 | 0.2 | 6.1  | 0.0 | 5.6 | 0.9278973 | 168.5  | 9.4  | 167.4  | 9.4  | 151.9  | 53.1  | -10.9 |
| Spot 178 | 5321260 | 5478559 | 8421.4   | 2.7 | 19.1 | 1.4 | 0.3 | 2.1  | 0.0 | 1.6 | 0.7410761 | 249.7  | 3.9  | 250.7  | 4.7  | 259.9  | 33.0  | 3.9   |
| Spot 179 | 1758341 | 1810318 | 7690.5   | 1.6 | 19.5 | 1.5 | 0.3 | 2.8  | 0.0 | 1.6 | 0.5936463 | 274.5  | 4.4  | 267.3  | 6.5  | 204.0  | 51.6  | -34.6 |
| Spot 180 | 412498  | 424692  | 19353.7  | 2.9 | 14.6 | 3.3 | 1.4 | 6.8  | 0.2 | 5.9 | 0.8735591 | 903.3  | 50.0 | 898.7  | 40.6 | 887.6  | 68.4  | -1.8  |
| Spot 181 | 1435763 | 1478205 | 419555.7 | 6.0 | 11.1 | 1.2 | 3.1 | 2.0  | 0.2 | 1.7 | 0.8207621 | 1431.5 | 21.3 | 1438.6 | 15.5 | 1449.1 | 22.0  | 1.2   |
| Spot 183 | 1830390 | 1884497 | 64578.3  | 2.9 | 13.8 | 0.9 | 1.8 | 1.8  | 0.2 | 1.6 | 0.8596867 | 1077.6 | 15.5 | 1062.6 | 11.9 | 1032.0 | 18.7  | -4.4  |
| Spot 184 | 2548782 | 2624125 | 31066.0  | 2.7 | 13.8 | 0.7 | 1.8 | 1.6  | 0.2 | 1.4 | 0.8858602 | 1030.2 | 13.4 | 1027.9 | 10.3 | 1022.9 | 14.9  | -0.7  |
| Spot 185 | 1237215 | 1273788 | 18482.1  | 5.5 | 13.9 | 0.9 | 1.7 | 1.5  | 0.2 | 1.2 | 0.7980407 | 1000.0 | 11.1 | 995.2  | 9.6  | 984.5  | 18.5  | -1.6  |
| Spot 186 | 250403  | 257805  | 2374.1   | 2.7 | 13.4 | 3.3 | 1.3 | 5.0  | 0.1 | 2.6 | 0.5260333 | 808.4  | 20.0 | 835.4  | 28.5 | 908.0  | 87.8  | 11.0  |

|          |         |         |          |      |      |     |     |      |     |     |           |        |      |        |      |        |       |        |
|----------|---------|---------|----------|------|------|-----|-----|------|-----|-----|-----------|--------|------|--------|------|--------|-------|--------|
| Spot 187 | 1447974 | 1490776 | 11980.8  | 2.5  | 12.7 | 0.8 | 2.2 | 1.7  | 0.2 | 1.5 | 0.8840401 | 1186.2 | 16.3 | 1175.3 | 11.8 | 1155.3 | 15.8  | -2.7   |
| Spot 188 | 5418272 | 5578439 | 29015.1  | 15.9 | 19.7 | 1.0 | 0.3 | 1.7  | 0.0 | 1.4 | 0.8056584 | 238.7  | 3.2  | 238.2  | 3.6  | 232.8  | 23.5  | -2.6   |
| Spot 189 | 8772447 | 9031765 | 40975.7  | 0.6  | 19.2 | 0.9 | 0.3 | 2.0  | 0.0 | 1.8 | 0.8926322 | 277.2  | 4.8  | 280.5  | 4.9  | 307.7  | 20.4  | 9.9    |
| Spot 190 | 1383482 | 1424379 | 24540.3  | 21.2 | 13.5 | 1.0 | 1.7 | 1.5  | 0.2 | 1.1 | 0.7352175 | 1017.3 | 10.6 | 1026.5 | 9.9  | 1046.1 | 21.0  | 2.8    |
| Spot 191 | 622669  | 641075  | 19649.1  | 3.0  | 14.4 | 2.0 | 1.4 | 3.5  | 0.1 | 2.9 | 0.8219159 | 889.0  | 24.1 | 896.2  | 21.0 | 914.1  | 41.4  | 2.7    |
| Spot 193 | 723501  | 744888  | 30864.6  | 2.2  | 12.8 | 1.2 | 2.2 | 1.8  | 0.2 | 1.4 | 0.7571028 | 1178.2 | 14.8 | 1172.9 | 12.7 | 1163.0 | 23.6  | -1.3   |
| Spot 194 | 590983  | 608452  | 12342.0  | 1.5  | 12.6 | 1.5 | 2.1 | 1.9  | 0.2 | 1.2 | 0.6276561 | 1133.6 | 12.3 | 1146.8 | 13.0 | 1172.1 | 29.1  | 3.3    |
| Spot 195 | 3642761 | 3750443 | 272150.6 | 2.6  | 13.7 | 0.9 | 1.8 | 1.5  | 0.2 | 1.2 | 0.8135016 | 1027.2 | 11.8 | 1028.9 | 9.9  | 1032.6 | 18.0  | 0.5    |
| Spot 196 | 722223  | 743573  | 19444.8  | 3.2  | 12.2 | 1.0 | 2.4 | 1.7  | 0.2 | 1.4 | 0.8187466 | 1231.8 | 15.7 | 1235.8 | 12.2 | 1242.7 | 19.2  | 0.9    |
| Spot 197 | 1165209 | 1199654 | 245698.8 | 2.4  | 16.6 | 1.1 | 0.8 | 1.5  | 0.1 | 1.0 | 0.6987124 | 617.8  | 6.2  | 620.6  | 7.0  | 630.8  | 23.1  | 2.1    |
| Spot 198 | 972986  | 1001748 | 20166.7  | 2.9  | 12.4 | 0.9 | 2.4 | 1.8  | 0.2 | 1.5 | 0.8575047 | 1232.9 | 17.3 | 1229.3 | 12.8 | 1223.0 | 18.2  | -0.8   |
| Spot 199 | 2064065 | 2125080 | 4944.4   | 1.3  | 8.9  | 1.0 | 4.7 | 2.7  | 0.3 | 2.2 | 0.8071125 | 1733.5 | 33.3 | 1766.2 | 22.7 | 1805.1 | 29.2  | 4.0    |
| Spot 200 | 367799  | 378671  | 2093.4   | 1.8  | 15.4 | 5.4 | 0.2 | 6.8  | 0.0 | 4.1 | 0.601402  | 186.7  | 7.5  | 215.2  | 13.1 | 540.5  | 118.1 | 65.5   |
| Spot 203 | 1255979 | 1293106 | 24064.8  | 3.0  | 11.8 | 0.9 | 2.8 | 1.7  | 0.2 | 1.5 | 0.8486631 | 1382.0 | 18.3 | 1357.7 | 13.0 | 1319.7 | 17.7  | -4.7   |
| Spot 204 | 742241  | 764182  | 2709.9   | 1.1  | 16.4 | 4.9 | 0.4 | 5.4  | 0.0 | 2.1 | 0.3969701 | 295.2  | 6.2  | 314.7  | 14.6 | 461.6  | 110.1 | 36.0   |
| Spot 205 | 550163  | 566426  | 1044.1   | 3.1  | 17.6 | 2.5 | 0.4 | 4.2  | 0.1 | 2.9 | 0.6825847 | 405.0  | 11.2 | 329.0  | 11.8 | NA     | NA    |        |
| Spot 206 | 2637572 | 2715540 | 24916.2  | 1.7  | 19.3 | 1.4 | 0.3 | 1.8  | 0.0 | 1.1 | 0.616576  | 267.9  | 2.9  | 267.4  | 4.2  | 263.1  | 32.5  | -1.8   |
| Spot 207 | 2295334 | 2363185 | 100847.4 | 1.6  | 14.2 | 3.2 | 1.6 | 4.8  | 0.2 | 3.6 | 0.754018  | 993.8  | 33.4 | 980.7  | 30.3 | 951.5  | 64.6  | -4.4   |
| Spot 208 | 1559324 | 1605418 | 3231.3   | 1.3  | 19.0 | 2.1 | 0.3 | 3.0  | 0.0 | 2.0 | 0.6727846 | 300.5  | 5.9  | 280.8  | 7.3  | 119.5  | 52.1  | -151.5 |
| Spot 210 | 272369  | 280420  | 923.5    | 2.5  | 19.0 | 4.4 | 0.2 | 10.2 | 0.0 | 4.1 | 0.4047234 | 275.8  | 11.1 | 203.0  | 18.8 | NA     | NA    |        |
| Spot 211 | 882986  | 909088  | 1059.7   | 2.0  | 20.2 | 2.6 | 0.2 | 3.6  | 0.0 | 1.8 | 0.4926727 | 242.6  | 4.2  | 176.0  | 5.8  | NA     | NA    |        |
| Spot 212 | 1362484 | 1402760 | 7566.4   | 2.6  | 17.2 | 1.1 | 0.7 | 1.7  | 0.1 | 1.2 | 0.7235914 | 541.6  | 6.4  | 529.2  | 7.0  | 476.1  | 26.0  | -13.8  |
| Spot 214 | 3005523 | 3094368 | 147864.3 | 4.2  | 12.3 | 1.6 | 2.2 | 2.2  | 0.2 | 1.4 | 0.6617321 | 1160.1 | 15.2 | 1187.8 | 15.1 | 1238.6 | 31.8  | 6.3    |
| Spot 215 | 1680059 | 1729722 | 149192.6 | 1.6  | 16.9 | 1.2 | 0.9 | 1.9  | 0.1 | 1.5 | 0.7823067 | 641.2  | 9.2  | 630.7  | 9.0  | 593.2  | 26.0  | -8.1   |
| Spot 217 | 830538  | 855089  | 2685.1   | 0.9  | 18.7 | 3.4 | 0.2 | 4.6  | 0.0 | 2.2 | 0.4810001 | 186.6  | 4.1  | 181.8  | 7.7  | 120.1  | 96.1  | -55.4  |
| Spot 218 | 1031056 | 1061534 | 2446.1   | 1.1  | 19.0 | 3.3 | 0.2 | 4.8  | 0.0 | 3.0 | 0.6341974 | 197.7  | 5.9  | 186.8  | 8.1  | 50.8   | NA    | -289.5 |
| Spot 219 | 3155742 | 3249027 | 84035.9  | 2.3  | 19.9 | 1.1 | 0.3 | 1.8  | 0.0 | 1.4 | 0.7769872 | 233.1  | 3.2  | 232.0  | 3.8  | 220.5  | 26.4  | -5.7   |
| Spot 220 | 623166  | 641587  | 17017.0  | 2.8  | 14.2 | 1.5 | 1.5 | 2.2  | 0.2 | 1.6 | 0.7229967 | 938.4  | 13.6 | 938.6  | 13.2 | 939.0  | 30.6  | 0.1    |
| Spot 221 | 1484190 | 1528063 | 44914.9  | 3.0  | 20.3 | 2.3 | 0.1 | 3.1  | 0.0 | 2.0 | 0.6533021 | 98.3   | 2.0  | 101.1  | 3.0  | 166.5  | 54.6  | 41.0   |
| Spot 222 | 1567111 | 1613436 | 81883.8  | 0.9  | 13.7 | 1.3 | 1.8 | 2.0  | 0.2 | 1.5 | 0.7504299 | 1063.8 | 14.8 | 1052.6 | 13.2 | 1029.5 | 27.0  | -3.3   |
| Spot 223 | 1825465 | 1879426 | 16500.7  | 2.9  | 13.0 | 1.0 | 2.1 | 1.8  | 0.2 | 1.4 | 0.8004761 | 1151.1 | 14.9 | 1136.3 | 12.1 | 1108.0 | 21.2  | -3.9   |
| Spot 225 | 2348145 | 2417558 | 34381.0  | 1.9  | 14.2 | 0.9 | 1.5 | 1.5  | 0.2 | 1.2 | 0.8242564 | 918.9  | 10.7 | 925.0  | 9.2  | 939.6  | 17.5  | 2.2    |
| Spot 226 | 2253716 | 2320337 | 35683.6  | 1.9  | 18.9 | 1.3 | 0.3 | 1.9  | 0.0 | 1.3 | 0.7057014 | 271.4  | 3.5  | 277.5  | 4.5  | 329.5  | 30.1  | 17.6   |
| Spot 227 | 1802468 | 1855750 | 3264.1   | 0.7  | 20.2 | 2.6 | 0.2 | 5.1  | 0.0 | 3.1 | 0.6202179 | 204.8  | 6.4  | 187.2  | 8.7  | NA     | NA    |        |
| Spot 228 | 2090367 | 2152159 | 2015.6   | 1.7  | 20.3 | 3.4 | 0.1 | 4.9  | 0.0 | 1.8 | 0.3705586 | 55.2   | 1.0  | 49.7   | 2.4  | NA     | NA    |        |
| Spot 229 | 252793  | 260266  | 11594.2  | 3.9  | 11.9 | 1.5 | 2.2 | 2.4  | 0.2 | 1.9 | 0.7656316 | 1111.9 | 19.0 | 1172.8 | 16.9 | 1287.1 | 30.4  | 13.6   |
| Spot 230 | 1854877 | 1909708 | 97654.7  | 1.0  | 19.3 | 2.1 | 0.3 | 2.6  | 0.0 | 1.6 | 0.6213302 | 282.7  | 4.5  | 283.3  | 6.5  | 288.2  | 47.1  | 1.9    |
| Spot 231 | 4911900 | 5057098 | 34683.5  | 8.6  | 16.6 | 1.2 | 0.8 | 1.9  | 0.1 | 1.5 | 0.7783593 | 596.9  | 8.3  | 600.6  | 8.5  | 614.6  | 25.4  | 2.9    |
| Spot 232 | 2372291 | 2442417 | 44230.8  | 3.6  | 11.5 | 0.9 | 2.9 | 1.3  | 0.2 | 0.9 | 0.7007019 | 1406.4 | 11.6 | 1393.5 | 10.0 | 1373.9 | 18.0  | -2.4   |
| Spot 233 | 1695522 | 1745643 | 45181.6  | 3.0  | 11.4 | 1.1 | 2.7 | 3.5  | 0.2 | 3.3 | 0.9512843 | 1298.6 | 38.9 | 1333.1 | 25.8 | 1389.1 | 20.6  | 6.5    |
| Spot 234 | 6165613 | 6347872 | 17414.3  | 0.8  | 19.2 | 1.4 | 0.3 | 1.9  | 0.0 | 1.3 | 0.6747184 | 270.4  | 3.4  | 270.7  | 4.5  | 273.1  | 32.3  | 1.0    |
| Spot 235 | 432512  | 445298  | 31611.7  | 4.1  | 14.4 | 2.5 | 1.5 | 4.1  | 0.2 | 3.3 | 0.7911204 | 927.7  | 28.3 | 926.0  | 25.2 | 922.1  | 52.1  | -0.6   |
| Spot 236 | 1228285 | 1264593 | 21777.1  | 1.9  | 13.7 | 1.4 | 1.8 | 1.9  | 0.2 | 1.2 | 0.6638402 | 1039.6 | 11.9 | 1032.4 | 12.1 | 1017.4 | 28.4  | -2.2   |

|          |         |         |          |      |      |     |     |     |     |     |           |        |      |        |      |        |       |        |
|----------|---------|---------|----------|------|------|-----|-----|-----|-----|-----|-----------|--------|------|--------|------|--------|-------|--------|
| Spot 238 | 576621  | 593666  | 16839.0  | 1.9  | 12.6 | 1.3 | 2.2 | 2.0 | 0.2 | 1.5 | 0.7441991 | 1203.2 | 16.5 | 1194.6 | 14.2 | 1179.2 | 26.8  | -2.0   |
| Spot 239 | 1561222 | 1607373 | 20328.6  | 3.5  | 13.8 | 1.0 | 1.7 | 1.9 | 0.2 | 1.6 | 0.8255395 | 995.4  | 14.4 | 999.2  | 12.0 | 1007.7 | 21.6  | 1.2    |
| Spot 240 | 398280  | 410053  | 9639.8   | 2.7  | 12.5 | 1.5 | 2.2 | 2.4 | 0.2 | 1.9 | 0.7830877 | 1171.5 | 20.4 | 1175.6 | 17.0 | 1183.2 | 30.0  | 1.0    |
| Spot 241 | 218467  | 224925  | 2499.6   | 1.1  | 11.7 | 2.7 | 2.2 | 3.4 | 0.2 | 2.0 | 0.5752474 | 1139.2 | 20.5 | 1168.6 | 23.7 | 1223.6 | 54.8  | 6.9    |
| Spot 242 | 1288056 | 1326131 | 39728.4  | 16.8 | 12.3 | 0.8 | 2.4 | 1.7 | 0.2 | 1.5 | 0.8853459 | 1258.0 | 17.1 | 1251.6 | 12.2 | 1240.6 | 15.4  | -1.4   |
| Spot 243 | 305955  | 314999  | 11755.8  | 2.6  | 14.7 | 2.4 | 1.3 | 4.7 | 0.1 | 4.0 | 0.8639448 | 869.3  | 32.9 | 865.4  | 27.3 | 855.7  | 48.9  | -1.6   |
| Spot 244 | 3730235 | 3840502 | 217454.0 | 3.3  | 14.2 | 0.7 | 1.5 | 1.2 | 0.2 | 1.0 | 0.8004279 | 937.7  | 8.7  | 943.3  | 7.7  | 956.3  | 15.3  | 1.9    |
| Spot 245 | 817005  | 841156  | 30422.6  | 2.8  | 12.3 | 1.6 | 2.2 | 2.2 | 0.2 | 1.6 | 0.7115666 | 1169.1 | 17.1 | 1191.5 | 15.8 | 1232.4 | 31.0  | 5.1    |
| Spot 247 | 1975394 | 2033787 | 37186.8  | 13.5 | 13.4 | 1.6 | 1.0 | 2.6 | 0.1 | 2.1 | 0.7980995 | 610.6  | 12.2 | 719.6  | 13.5 | 1076.3 | 31.7  | 43.3   |
| Spot 249 | 691527  | 711969  | 7477.1   | 1.0  | 14.9 | 4.6 | 0.4 | 5.3 | 0.0 | 2.7 | 0.5035821 | 308.8  | 8.1  | 375.4  | 16.7 | 810.1  | 96.5  | 61.9   |
| Spot 252 | 1411715 | 1453446 | 3035.5   | 1.7  | 18.9 | 1.8 | 0.3 | 3.3 | 0.0 | 1.5 | 0.4443756 | 277.6  | 4.0  | 262.1  | 7.6  | 125.2  | 69.2  | -121.8 |
| Spot 254 | 1616888 | 1664684 | 27251.1  | 3.8  | 11.1 | 0.8 | 3.2 | 1.4 | 0.3 | 1.2 | 0.8261255 | 1476.7 | 15.8 | 1463.6 | 11.2 | 1444.6 | 15.5  | -2.2   |
| Spot 255 | 1899069 | 1955207 | 3491.5   | 1.4  | 18.8 | 1.9 | 0.3 | 2.2 | 0.0 | 1.2 | 0.5250861 | 278.8  | 3.2  | 268.2  | 5.2  | 176.3  | 43.7  | -58.2  |
| Spot 256 | 3583723 | 3689659 | 15081.8  | 1.4  | 19.2 | 1.5 | 0.3 | 2.4 | 0.0 | 1.8 | 0.7402553 | 271.5  | 4.7  | 272.7  | 5.7  | 283.4  | 36.7  | 4.2    |
| Spot 258 | 4459620 | 4591448 | 11211.0  | 2.1  | 19.1 | 1.1 | 0.3 | 1.7 | 0.0 | 1.3 | 0.7432838 | 280.1  | 3.6  | 279.4  | 4.3  | 273.7  | 26.8  | -2.3   |
| Spot 259 | 3968331 | 4085637 | 44004.3  | 2.8  | 14.4 | 0.8 | 1.5 | 1.6 | 0.2 | 1.3 | 0.8387208 | 915.8  | 11.2 | 918.3  | 9.4  | 924.4  | 17.5  | 0.9    |
| Spot 260 | 4395077 | 4524997 | 868.5    | 0.9  | 20.0 | 2.3 | 0.0 | 3.7 | 0.0 | 1.5 | 0.3934154 | 54.4   | 0.8  | 38.5   | 1.4  | NA     | NA    |        |
| Spot 261 | 1251413 | 1288406 | 14177.0  | 1.7  | 10.2 | 0.8 | 3.8 | 1.8 | 0.3 | 1.6 | 0.8869635 | 1601.5 | 22.5 | 1596.7 | 14.4 | 1590.4 | 15.4  | -0.7   |
| Spot 262 | 3125341 | 3217728 | 3308.5   | 9.7  | 16.6 | 2.0 | 0.4 | 2.5 | 0.1 | 1.5 | 0.6154135 | 316.4  | 4.7  | 336.0  | 7.1  | 473.9  | 43.6  | 33.2   |
| Spot 263 | 3509336 | 3613074 | 9370.6   | 1.2  | 19.0 | 1.4 | 0.3 | 2.3 | 0.0 | 1.7 | 0.7334363 | 275.6  | 4.5  | 275.8  | 5.5  | 277.6  | 35.2  | 0.8    |
| Spot 264 | 1493983 | 1538146 | 937.5    | 3.0  | 19.4 | 3.8 | 0.1 | 5.5 | 0.0 | 2.6 | 0.4739124 | 81.7   | 2.1  | 62.5   | 3.3  | NA     | NA    |        |
| Spot 265 | 1187673 | 1222781 | 6473.0   | 4.0  | 13.6 | 1.2 | 1.7 | 1.9 | 0.2 | 1.5 | 0.7935853 | 1018.0 | 14.2 | 1013.3 | 12.2 | 1003.1 | 23.4  | -1.5   |
| Spot 266 | 2984640 | 3072868 | 22965.0  | 0.8  | 18.5 | 2.6 | 0.3 | 2.9 | 0.0 | 1.4 | 0.4643851 | 252.6  | 3.4  | 265.1  | 6.8  | 377.2  | 58.3  | 33.0   |
| Spot 267 | 629983  | 648606  | 18223.8  | 1.8  | 14.4 | 1.6 | 1.5 | 2.3 | 0.2 | 1.7 | 0.7116322 | 943.9  | 14.7 | 934.3  | 14.3 | 911.5  | 33.9  | -3.6   |
| Spot 269 | 1080567 | 1112509 | 5212.0   | 2.7  | 14.2 | 1.6 | 1.5 | 2.7 | 0.2 | 2.2 | 0.8029125 | 925.7  | 18.8 | 913.7  | 16.4 | 884.7  | 33.6  | -4.6   |
| Spot 270 | 6886558 | 7090129 | 19417.8  | 15.1 | 19.9 | 0.9 | 0.3 | 1.3 | 0.0 | 0.9 | 0.683616  | 255.4  | 2.2  | 250.2  | 2.8  | 201.8  | 21.7  | -26.6  |
| Spot 271 | 1372607 | 1413182 | 4507.8   | 1.3  | 16.9 | 6.1 | 0.1 | 8.2 | 0.0 | 5.0 | 0.606723  | 61.9   | 3.1  | 73.8   | 5.8  | 480.0  | 143.9 | 87.1   |
| Spot 272 | 4465761 | 4597771 | 101004.5 | 0.8  | 19.0 | 2.2 | 0.3 | 3.5 | 0.0 | 2.7 | 0.7841998 | 282.9  | 7.5  | 289.5  | 8.8  | 342.4  | 48.8  | 17.4   |
| Spot 273 | 1011826 | 1041736 | 103476.2 | 3.7  | 12.7 | 1.0 | 2.2 | 1.6 | 0.2 | 1.2 | 0.7719671 | 1174.2 | 13.1 | 1179.9 | 11.0 | 1190.2 | 19.8  | 1.3    |
| Spot 274 | 2872069 | 2956969 | 45964.4  | 1.7  | 12.7 | 0.8 | 2.3 | 1.5 | 0.2 | 1.3 | 0.8447143 | 1215.6 | 14.1 | 1202.0 | 10.6 | 1177.6 | 15.9  | -3.2   |
| Spot 277 | 3883025 | 3997809 | 26135.3  | 2.6  | 17.5 | 0.8 | 0.6 | 1.6 | 0.1 | 1.3 | 0.8476666 | 496.2  | 6.4  | 498.9  | 6.2  | 511.2  | 18.4  | 2.9    |
| Spot 279 | 2469853 | 2542863 | 170322.8 | 4.0  | 12.5 | 0.8 | 2.2 | 1.6 | 0.2 | 1.4 | 0.8638653 | 1138.7 | 14.1 | 1166.4 | 10.8 | 1218.3 | 15.5  | 6.5    |
| Spot 280 | 3153189 | 3246398 | 2630.6   | 3.5  | 20.6 | 2.2 | 0.1 | 4.3 | 0.0 | 1.6 | 0.381203  | 69.4   | 1.1  | 63.7   | 2.6  | NA     | NA    |        |
| Spot 281 | 913880  | 940895  | 64827.4  | 3.2  | 11.5 | 1.1 | 2.8 | 1.7 | 0.2 | 1.3 | 0.7707378 | 1336.8 | 15.9 | 1352.0 | 12.8 | 1375.9 | 20.9  | 2.8    |
| Spot 282 | 1030195 | 1060648 | 58080.0  | 4.0  | 14.3 | 1.0 | 1.6 | 1.6 | 0.2 | 1.3 | 0.8027378 | 988.7  | 12.1 | 978.4  | 10.3 | 955.3  | 20.1  | -3.5   |
| Spot 283 | 2567403 | 2643296 | 26077.8  | 1.3  | 13.4 | 0.9 | 1.7 | 1.6 | 0.2 | 1.3 | 0.8073637 | 982.8  | 11.6 | 1010.2 | 10.0 | 1070.1 | 18.6  | 8.2    |
| Spot 285 | 1071951 | 1103638 | 35258.5  | 1.7  | 14.4 | 1.1 | 1.5 | 1.9 | 0.2 | 1.6 | 0.8054956 | 908.9  | 13.2 | 916.2  | 11.7 | 933.6  | 23.5  | 2.6    |
| Spot 286 | 471535  | 485474  | 33536.4  | 2.3  | 12.8 | 1.4 | 2.1 | 2.3 | 0.2 | 1.8 | 0.7795143 | 1138.4 | 18.6 | 1145.7 | 15.7 | 1159.7 | 28.3  | 1.8    |
| Spot 287 | 5529785 | 5693248 | 11191.1  | 11.4 | 18.9 | 1.3 | 0.3 | 1.8 | 0.0 | 1.2 | 0.6867519 | 268.8  | 3.3  | 271.3  | 4.3  | 293.1  | 30.1  | 8.3    |
| Spot 288 | 442385  | 455462  | 10052.1  | 1.5  | 12.9 | 1.1 | 2.1 | 2.2 | 0.2 | 1.8 | 0.8019289 | 1155.6 | 18.6 | 1142.8 | 15.1 | 1118.5 | 26.1  | -3.3   |
| Spot 290 | 1748907 | 1800605 | 10570.2  | 2.9  | 12.6 | 1.1 | 2.2 | 1.7 | 0.2 | 1.2 | 0.7024445 | 1173.9 | 12.9 | 1170.3 | 11.9 | 1163.7 | 24.2  | -0.9   |
| Spot 292 | 1545742 | 1591435 | 13947.6  | 1.7  | 19.0 | 1.9 | 0.3 | 2.7 | 0.0 | 2.0 | 0.7293586 | 272.0  | 5.3  | 273.8  | 6.5  | 289.2  | 42.6  | 6.0    |
| Spot 293 | 1723173 | 1774111 | 53593.7  | 1.5  | 19.7 | 2.0 | 0.2 | 2.6 | 0.0 | 1.7 | 0.6434947 | 174.7  | 2.9  | 179.3  | 4.3  | 239.5  | 45.8  | 27.0   |

|                           |         |         |           |      |      |      |     |      |     |      |           |        |       |        |       |        |       |         |
|---------------------------|---------|---------|-----------|------|------|------|-----|------|-----|------|-----------|--------|-------|--------|-------|--------|-------|---------|
| Spot 294                  | 778367  | 801376  | 9571.2    | 1.6  | 12.9 | 1.1  | 1.9 | 3.6  | 0.2 | 3.4  | 0.9470021 | 1077.9 | 33.7  | 1089.5 | 24.0  | 1112.9 | 23.0  | 3.1     |
| Spot 295                  | 5286174 | 5442437 | 54472.4   | 9.4  | 14.1 | 1.4  | 0.5 | 2.2  | 0.1 | 1.8  | 0.7909653 | 322.3  | 5.5   | 414.7  | 7.6   | 967.8  | 27.7  | 66.7    |
| Spot 296                  | 973325  | 1002097 | 4099.7    | 1.8  | 19.3 | 2.4  | 0.2 | 3.2  | 0.0 | 1.7  | 0.5271401 | 188.0  | 3.1   | 184.5  | 5.3   | 139.9  | 63.2  | -34.4   |
| Spot 297                  | 3078490 | 3169492 | 66887.6   | 8.8  | 14.3 | 1.0  | 1.5 | 2.4  | 0.2 | 2.2  | 0.9166875 | 935.9  | 19.4  | 936.8  | 14.9  | 939.0  | 19.9  | 0.3     |
| Spot 298                  | 3066589 | 3157239 | 182832.0  | 1.1  | 19.6 | 1.0  | 0.3 | 1.6  | 0.0 | 1.3  | 0.7749578 | 276.0  | 3.5   | 275.5  | 4.0   | 271.2  | 23.9  | -1.8    |
| Spot 299                  | 486302  | 500678  | 3192.6    | 1.6  | 18.2 | 3.6  | 0.3 | 4.4  | 0.0 | 2.4  | 0.5412083 | 282.7  | 6.6   | 277.9  | 10.7  | 237.7  | 85.2  | -19.0   |
| Spot 300                  | 533384  | 549151  | 7217.1    | 1.6  | 10.9 | 7.7  | 0.4 | 8.1  | 0.0 | 2.5  | 0.3083901 | 203.3  | 5.0   | 341.7  | 23.5  | 1436.9 | 147.4 | 85.9    |
| Spot 304                  | 1741180 | 1792650 | 4815.8    | 1.8  | 18.8 | 1.7  | 0.3 | 3.0  | 0.0 | 1.8  | 0.5937815 | 296.9  | 5.1   | 288.8  | 7.5   | 224.0  | 55.5  | -32.5   |
| Spot 305                  | 3761418 | 3872607 | 8536.2    | 26.7 | 18.7 | 2.7  | 0.3 | 3.1  | 0.0 | 1.4  | 0.4599956 | 243.5  | 3.4   | 249.3  | 6.8   | 303.4  | 62.3  | 19.7    |
| Spot 306                  | 570711  | 587582  | 3962.8    | 6.0  | 13.6 | 1.4  | 1.6 | 3.7  | 0.2 | 2.2  | 0.5951233 | 1002.9 | 20.2  | 988.4  | 23.1  | 956.3  | 60.0  | -4.9    |
| Spot 307                  | 2613620 | 2690880 | 4013.5    | 3.0  | 20.0 | 1.4  | 0.2 | 3.5  | 0.0 | 1.5  | 0.4396729 | 233.1  | 3.5   | 216.6  | 6.7   | 40.5   | NA    | -475.0  |
| Spot 308                  | 757700  | 780098  | 1986.7    | 1.6  | 18.0 | 3.3  | 0.3 | 5.4  | 0.0 | 1.7  | 0.3057279 | 271.9  | 4.4   | 257.6  | 12.3  | 129.4  | 121.2 | -110.1  |
| Spot 309                  | 699816  | 720503  | 10522.8   | 3.9  | 12.8 | 1.1  | 2.1 | 1.6  | 0.2 | 1.2  | 0.7484137 | 1159.9 | 13.0  | 1154.4 | 11.3  | 1144.0 | 21.6  | -1.4    |
| Spot 311                  | 532108  | 547838  | 3371.0    | 1.9  | 17.1 | 2.1  | 0.6 | 2.8  | 0.1 | 1.7  | 0.6090091 | 466.1  | 7.7   | 456.3  | 10.4  | 407.1  | 50.0  | -14.5   |
| Spot 313                  | 3133141 | 3225758 | 26157.5   | 3.4  | 14.2 | 1.6  | 1.3 | 2.6  | 0.1 | 2.1  | 0.7898213 | 831.4  | 16.0  | 861.8  | 15.1  | 940.8  | 32.7  | 11.6    |
| Spot 314                  | 1294853 | 1333130 | 11998.2   | 1.5  | 19.0 | 2.9  | 0.3 | 3.7  | 0.0 | 2.4  | 0.6336236 | 279.7  | 6.5   | 280.0  | 9.1   | 282.7  | 65.9  | 1.1     |
| <b>Run 2 (discordant)</b> |         |         |           |      |      |      |     |      |     |      |           |        |       |        |       |        |       |         |
| Spot 100                  | 240704  | 247820  | 1247.7    | 1.8  | 15.5 | 6.1  | 1.3 | 8.1  | 0.1 | 5.4  | 0.6670492 | 872.3  | 44.3  | 839.8  | 46.6  | 754.7  | 128.2 | -15.6   |
| Spot 101                  | 269019  | 276971  | 6593.0    | 3.2  | 16.6 | 2.2  | 1.5 | 3.0  | 0.2 | 2.1  | 0.6915202 | 1054.1 | 20.5  | 921.9  | 18.4  | 617.4  | 47.4  | -70.7   |
| Spot 104                  | 1882959 | 1938620 | 18643.9   | 2.1  | 12.5 | 1.5  | 2.6 | 4.2  | 0.2 | 4.0  | 0.9386719 | 1358.2 | 48.7  | 1297.9 | 31.0  | 1199.7 | 28.8  | -13.2   |
| Spot 107                  | 4908372 | 5053466 | 4955484.8 | 6.4  | 13.1 | 1.4  | 1.4 | 2.3  | 0.1 | 1.9  | 0.799264  | 803.8  | 14.0  | 888.1  | 13.7  | 1104.4 | 27.8  | 27.2    |
| Spot 109                  | 590610  | 608069  | 15253.6   | 3.1  | 13.6 | 2.6  | 1.4 | 4.9  | 0.1 | 4.1  | 0.8419608 | 813.0  | 31.4  | 872.7  | 28.6  | 1027.3 | 53.3  | 20.9    |
| Spot 110                  | 463136  | 476827  | 4512.6    | 1.9  | 13.1 | 1.4  | 2.1 | 2.3  | 0.2 | 1.8  | 0.8019013 | 1162.3 | 19.3  | 1141.6 | 15.6  | 1102.5 | 27.1  | -5.4    |
| Spot 120                  | 3363128 | 3462544 | 64946.9   | 18.3 | 9.1  | 0.8  | 3.8 | 1.9  | 0.2 | 1.7  | 0.8979763 | 1435.9 | 21.7  | 1587.6 | 15.1  | 1795.5 | 15.0  | 20.0    |
| Spot 121                  | 498534  | 513271  | 11228.8   | 0.8  | 27.5 | 2.8  | 0.2 | 30.1 | 0.0 | 30.0 | 0.9956886 | 259.6  | 76.3  | 190.1  | 52.3  | NA     | NA    |         |
| Spot 124                  | 302152  | 311084  | 386.8     | 0.3  | 57.5 | 61.7 | 0.1 | 61.7 | 0.0 | 2.6  | 0.042672  | 190.4  | 4.9   | 70.5   | 42.1  | NA     | NA    |         |
| Spot 125                  | 3321464 | 3419649 | 5229.3    | 1.5  | 20.5 | 3.9  | 0.1 | 10.0 | 0.0 | 9.3  | 0.9222403 | 77.4   | 7.1   | 79.4   | 7.7   | 139.2  | 91.3  | 44.4    |
| Spot 129                  | 3724533 | 3834632 | 30436.8   | 5.0  | 20.0 | 1.8  | 0.3 | 6.5  | 0.0 | 6.3  | 0.959664  | 277.8  | 17.1  | 268.7  | 15.5  | 189.5  | 42.8  | -46.6   |
| Spot 131                  | 2092212 | 2154059 | 94112.5   | 3.9  | 5.8  | 2.4  | 6.2 | 3.6  | 0.3 | 2.7  | 0.7470358 | 1489.7 | 36.1  | 2001.1 | 31.8  | 2580.2 | 40.4  | 42.3    |
| Spot 136                  | 368855  | 379758  | 3374.4    | 2.5  | 15.1 | 2.9  | 1.5 | 3.5  | 0.2 | 2.0  | 0.564344  | 964.2  | 17.5  | 919.1  | 20.9  | 812.6  | 59.8  | -18.7   |
| Spot 147                  | 464255  | 477978  | 38280.1   | 2.2  | 13.9 | 1.7  | 2.4 | 2.1  | 0.2 | 1.3  | 0.6008448 | 1399.9 | 16.0  | 1241.4 | 15.1  | 976.1  | 34.4  | -43.4   |
| Spot 150                  | 310380  | 319555  | 1293.9    | 1.5  | 16.5 | 3.7  | 1.2 | 5.0  | 0.1 | 3.4  | 0.6693126 | 859.3  | 27.1  | 797.2  | 27.8  | 627.2  | 80.6  | -37.0   |
| Spot 163                  | 905820  | 932596  | 1917.6    | 0.6  | 22.7 | 3.9  | 0.2 | 15.5 | 0.0 | 15.0 | 0.9685002 | 203.1  | 30.0  | 180.3  | 25.6  | NA     | NA    |         |
| Spot 171                  | 576579  | 593623  | 734.4     | 4.5  | 25.2 | 7.7  | 0.1 | 13.9 | 0.0 | 11.6 | 0.8331311 | 102.8  | 11.8  | 85.7   | 11.4  | NA     | NA    |         |
| Spot 173                  | 171674  | 176749  | 304.6     | 2.2  | 8.0  | 25.3 | 0.5 | 27.7 | 0.0 | 11.3 | 0.4083299 | 191.0  | 21.3  | 424.9  | 96.6  | 2033.2 | 455.9 | 90.6    |
| Spot 182                  | 362978  | 373708  | 1657.1    | 1.0  | 16.1 | 8.2  | 0.3 | 11.7 | 0.0 | 8.4  | 0.7124267 | 197.4  | 16.3  | 240.2  | 25.1  | 682.7  | 176.2 | 71.1    |
| Spot 19                   | 773050  | 795902  | 29837.9   | 1.2  | 10.2 | 1.3  | 4.1 | 2.2  | 0.3 | 1.7  | 0.7921412 | 1696.8 | 25.7  | 1651.9 | 17.7  | 1595.3 | 24.8  | -6.4    |
| Spot 192                  | 218001  | 224446  | 1863.5    | 1.2  | 16.3 | 4.1  | 1.7 | 20.3 | 0.2 | 19.9 | 0.9797562 | 1180.8 | 214.3 | 1008.7 | 130.3 | 651.8  | 87.1  | -81.2   |
| Spot 201                  | 333955  | 343826  | 4171.1    | 1.7  | 15.2 | 3.2  | 1.4 | 3.7  | 0.2 | 1.9  | 0.4956811 | 903.0  | 15.6  | 872.3  | 21.9  | 795.1  | 68.0  | -13.6   |
| Spot 202                  | 1329627 | 1368932 | 17925.6   | 3.0  | 12.9 | 3.0  | 1.6 | 3.4  | 0.1 | 1.6  | 0.4743028 | 892.6  | 13.5  | 966.6  | 21.3  | 1138.9 | 59.8  | 21.6    |
| Spot 209                  | 1955418 | 2013222 | 210240.8  | 1.4  | 21.6 | 1.8  | 0.3 | 15.0 | 0.0 | 14.9 | 0.9923919 | 306.3  | 44.5  | 274.8  | 36.1  | 14.3   | NA    | -2048.1 |
| Spot 21                   | 180860  | 186206  | 81274.2   | 1.9  | 13.3 | 2.7  | 1.4 | 3.6  | 0.1 | 2.4  | 0.6655292 | 797.9  | 18.2  | 874.7  | 21.4  | 1074.6 | 54.7  | 25.8    |
| Spot 213                  | 3500422 | 3603896 | 66551.6   | 7.5  | 12.5 | 0.8  | 2.4 | 1.6  | 0.2 | 1.4  | 0.8704749 | 1268.5 | 16.5  | 1241.8 | 11.8  | 1195.7 | 15.9  | -6.1    |

|          |         |         |          |      |       |      |     |      |     |      |           |        |       |        |       |        |       |        |
|----------|---------|---------|----------|------|-------|------|-----|------|-----|------|-----------|--------|-------|--------|-------|--------|-------|--------|
| Spot 216 | 85347   | 87870   | 838.5    | 2.3  | 19.6  | 8.7  | 1.1 | 10.2 | 0.2 | 5.4  | 0.5283981 | 968.4  | 48.6  | 771.9  | 55.4  | 238.6  | 200.7 | -305.8 |
| Spot 22  | 644151  | 663193  | 5072.9   | 2.7  | 14.9  | 1.0  | 1.4 | 1.6  | 0.2 | 1.3  | 0.7892122 | 911.5  | 10.7  | 889.5  | 9.4   | 835.1  | 20.3  | -9.1   |
| Spot 224 | 484585  | 498910  | 4873.5   | 4.0  | 14.7  | 1.7  | 1.6 | 2.4  | 0.2 | 1.7  | 0.7088479 | 988.0  | 15.6  | 952.5  | 14.8  | 871.4  | 35.0  | -13.4  |
| Spot 23  | 486279  | 500653  | 4483.1   | 3.7  | 14.9  | 2.1  | 1.4 | 3.1  | 0.2 | 2.3  | 0.7499618 | 913.5  | 19.8  | 890.8  | 18.4  | 835.0  | 42.8  | -9.4   |
| Spot 237 | 676077  | 696062  | 1209.4   | 1.6  | 28.5  | 4.7  | 0.1 | 9.8  | 0.0 | 8.5  | 0.8747699 | 194.3  | 16.3  | 140.0  | 12.8  | NA     | NA    |        |
| Spot 248 | 649446  | 668644  | 2324.2   | 1.7  | 23.2  | 4.1  | 0.3 | 18.9 | 0.1 | 18.5 | 0.9757338 | 332.3  | 59.9  | 277.1  | 46.0  | NA     | NA    |        |
| Spot 250 | 575838  | 592860  | 35831.2  | 1.9  | 15.0  | 3.1  | 1.5 | 5.8  | 0.2 | 4.9  | 0.8408079 | 990.5  | 44.6  | 940.1  | 35.4  | 824.0  | 65.3  | -20.2  |
| Spot 251 | 955800  | 984054  | 7985.5   | 4.5  | 13.4  | 3.9  | 1.7 | 7.3  | 0.2 | 6.2  | 0.8477359 | 982.5  | 56.2  | 1004.8 | 46.4  | 1053.9 | 77.7  | 6.8    |
| Spot 253 | 5546712 | 5710675 | 110978.1 | 9.9  | 12.5  | 0.8  | 2.4 | 1.6  | 0.2 | 1.4  | 0.8587317 | 1281.4 | 16.0  | 1251.0 | 11.5  | 1199.0 | 16.2  | -6.9   |
| Spot 257 | 1745502 | 1797100 | 38683.3  | 4.2  | 11.4  | 1.4  | 3.1 | 2.7  | 0.3 | 2.4  | 0.8649667 | 1479.0 | 31.4  | 1439.8 | 21.1  | 1382.5 | 26.5  | -7.0   |
| Spot 268 | 534335  | 550130  | 3778.5   | 2.0  | 13.0  | 1.8  | 2.1 | 2.7  | 0.2 | 2.0  | 0.7416746 | 1170.2 | 21.2  | 1150.5 | 18.4  | 1113.6 | 35.8  | -5.1   |
| Spot 27  | 343656  | 353815  | 21412.1  | 1.4  | 17.1  | 4.1  | 1.1 | 10.5 | 0.1 | 9.7  | 0.9207586 | 854.1  | 77.5  | 772.4  | 57.0  | 542.9  | 89.8  | -57.3  |
| Spot 275 | 604396  | 622262  | 4905.6   | 1.0  | 12.9  | 2.4  | 2.2 | 3.7  | 0.2 | 2.9  | 0.7681656 | 1205.6 | 31.7  | 1182.8 | 26.2  | 1141.4 | 47.7  | -5.6   |
| Spot 276 | 749860  | 772026  | 2759.6   | 1.2  | 19.2  | 5.2  | 0.2 | 12.5 | 0.0 | 11.4 | 0.9080619 | 207.6  | 23.2  | 214.6  | 24.2  | 291.7  | 119.7 | 28.8   |
| Spot 278 | 644446  | 663496  | 383.0    | 4.9  | 501.6 | 74.4 | 0.0 | 80.3 | 0.0 | 30.0 | 0.3737598 | 109.5  | 32.6  | 4.8    | 3.8   | NA     | NA    |        |
| Spot 284 | 534716  | 550522  | 2880.2   | 2.4  | 15.4  | 3.1  | 1.4 | 3.5  | 0.2 | 1.6  | 0.4677473 | 908.2  | 13.8  | 869.6  | 20.3  | 772.5  | 64.7  | -17.6  |
| Spot 289 | 435630  | 448508  | 2129.1   | 3.2  | 15.9  | 1.7  | 1.3 | 2.5  | 0.2 | 1.9  | 0.7441415 | 925.3  | 16.3  | 863.0  | 14.8  | 706.2  | 36.1  | -31.0  |
| Spot 29  | 658337  | 677798  | 2943.8   | 1.5  | 14.9  | 2.4  | 1.4 | 2.7  | 0.2 | 1.3  | 0.490026  | 929.3  | 11.6  | 902.3  | 16.3  | 836.8  | 49.5  | -11.1  |
| Spot 291 | 1493642 | 1537795 | 36495.3  | 3.5  | 11.9  | 1.0  | 2.8 | 2.0  | 0.2 | 1.8  | 0.8795678 | 1372.5 | 21.8  | 1342.8 | 15.0  | 1295.7 | 18.6  | -5.9   |
| Spot 301 | 443911  | 457033  | 135471.4 | 2.1  | 14.2  | 1.6  | 1.7 | 2.2  | 0.2 | 1.6  | 0.7046726 | 1035.5 | 15.1  | 1006.2 | 14.3  | 942.8  | 32.5  | -9.8   |
| Spot 302 | 436050  | 448940  | 2513.4   | 2.7  | 15.5  | 1.7  | 1.4 | 2.4  | 0.2 | 1.6  | 0.6905573 | 919.4  | 14.0  | 874.2  | 13.9  | 761.5  | 36.1  | -20.7  |
| Spot 303 | 4164129 | 4287222 | 30051.7  | 0.9  | 19.4  | 2.1  | 0.3 | 12.1 | 0.0 | 11.9 | 0.9845691 | 276.6  | 32.2  | 275.8  | 29.2  | 269.0  | 48.5  | -2.8   |
| Spot 31  | 456668  | 470167  | 36536.5  | 3.5  | 13.6  | 3.9  | 1.4 | 8.2  | 0.1 | 7.3  | 0.8826983 | 856.0  | 58.3  | 904.5  | 49.4  | 1024.8 | 78.3  | 16.5   |
| Spot 310 | 567570  | 584348  | 2456.9   | 3.3  | 15.4  | 1.6  | 1.4 | 2.3  | 0.2 | 1.6  | 0.7231673 | 938.2  | 14.2  | 890.5  | 13.4  | 773.8  | 32.8  | -21.2  |
| Spot 312 | 2337199 | 2406288 | 23843.3  | 4.2  | 12.0  | 0.8  | 2.7 | 1.4  | 0.2 | 1.1  | 0.8114087 | 1372.9 | 14.2  | 1338.4 | 10.5  | 1283.8 | 16.1  | -6.9   |
| Spot 315 | 380677  | 391930  | 4516.6   | 1.3  | 27.6  | 6.2  | 0.3 | 28.8 | 0.1 | 28.1 | 0.9763828 | 429.5  | 116.7 | 300.3  | 74.9  | NA     | NA    |        |
| Spot 35  | 1664225 | 1713421 | 9443.2   | 0.6  | 29.6  | 1.6  | 0.6 | 30.0 | 0.1 | 30.0 | 0.9985578 | 746.1  | 211.4 | 459.0  | 111.4 | NA     | NA    |        |
| Spot 55  | 542137  | 558163  | 2438.7   | 2.0  | 13.9  | 1.6  | 1.8 | 2.1  | 0.2 | 1.4  | 0.6440161 | 1093.5 | 13.7  | 1055.1 | 13.9  | 976.5  | 33.0  | -12.0  |
| Spot 56  | 361687  | 372379  | 5567.7   | 18.9 | 15.3  | 3.3  | 1.4 | 5.2  | 0.2 | 3.9  | 0.7623093 | 962.6  | 35.2  | 909.2  | 31.0  | 781.7  | 70.3  | -23.1  |
| Spot 62  | 7458655 | 7679137 | 136382.9 | 3.4  | 13.5  | 0.9  | 2.0 | 2.5  | 0.2 | 2.3  | 0.9287031 | 1158.9 | 24.8  | 1119.0 | 17.0  | 1042.1 | 18.8  | -11.2  |
| Spot 65  | 1289045 | 1327150 | 37187.4  | 1.0  | 20.1  | 2.7  | 0.3 | 13.7 | 0.1 | 13.5 | 0.979834  | 318.7  | 41.8  | 302.2  | 35.9  | 176.9  | 64.0  | -80.2  |
| Spot 7   | 602020  | 619816  | 347245.1 | 0.9  | 17.5  | 3.9  | 0.2 | 8.6  | 0.0 | 7.6  | 0.8900227 | 200.8  | 15.1  | 225.6  | 17.4  | 492.9  | 86.3  | 59.3   |
| Spot 76  | 1043004 | 1073835 | 2810.0   | 1.1  | 18.1  | 6.0  | 0.2 | 12.7 | 0.0 | 11.2 | 0.8802939 | 201.1  | 22.2  | 219.8  | 25.2  | 425.1  | 134.8 | 52.7   |
| Spot 9   | 601898  | 619690  | 1154.8   | 1.8  | 25.6  | 4.5  | 0.2 | 25.5 | 0.0 | 25.1 | 0.9843358 | 231.9  | 57.2  | 183.0  | 42.7  | NA     | NA    |        |
| Spot 95  | 1334552 | 1374002 | 17264.3  | 1.4  | 15.7  | 4.7  | 0.4 | 9.3  | 0.0 | 8.0  | 0.8614709 | 313.7  | 24.6  | 368.8  | 28.8  | 731.5  | 100.3 | 57.1   |



**Table S22.** DZStats Quantitative Comparison Statistics

**NM8A**

|                               |       |
|-------------------------------|-------|
| Cross correlation Coefficient | 0.851 |
| Likeness                      | 0.816 |
| Similarity                    | 0.957 |
| K-S p value                   | 0.004 |
| K-S test k statistic          | 0.097 |
| Kuiper Test p value           | 0.042 |
| Kuiper Test v statistic       | 0.098 |

**Rora Med**

|                               |       |
|-------------------------------|-------|
| Cross correlation Coefficient | 0.569 |
| Likeness                      | 0.695 |
| Similarity                    | 0.929 |
| K-S p value                   | 0.000 |
| K-S test k statistic          | 0.196 |
| Kuiper Test p value           | 0.000 |
| Kuiper Test v statistic       | 0.199 |
